# Supplementary material
Source: PubMed Central journal article supplement (PMC2818196)
Supplement: supp_123_4_586__1.pdf [file supp_123_4_586__1.pdf]

**Table S1. Complete protein list detected by proteomic assays.**

| Uniprot Accession ID                                      | Protein Description.                                                                        | prot_mass | prot_score MS08135_AA | prot_score ms08135_BB | prot_matches MS08135_AA(WT) | prot_matches ms08135_BB(KO) |
|-----------------------------------------------------------|---------------------------------------------------------------------------------------------|-----------|-----------------------|-----------------------|-----------------------------|-----------------------------|
| -----                                                     |                                                                                             |           | 0                     | 0                     | 0                           | 0                           |
| MS08135 A                                                 |                                                                                             |           | 0                     | 0                     | 0                           | 0                           |
| 2008-08-28T14:02:17Z                                      |                                                                                             |           | 0                     | 0                     | 0                           | 0                           |
| haiteng                                                   |                                                                                             |           | 0                     | 0                     | 0                           | 0                           |
| http://ms-searching2.rockefeller.edu/mascot/cgi/master_re |                                                                                             |           | 0                     | 0                     | 0                           | 0                           |
| C:\DATA\ms08135\ms08135_A.dta                             |                                                                                             |           | 0                     | 0                     | 0                           | 0                           |
| Sequest (.DTA)                                            |                                                                                             |           | 0                     | 0                     | 0                           | 0                           |
| MIS                                                       |                                                                                             |           | 0                     | 0                     | 0                           | 0                           |
| 2.2.1                                                     |                                                                                             |           | 0                     | 0                     | 0                           | 0                           |
| SwissProt                                                 |                                                                                             |           | 0                     | 0                     | 0                           | 0                           |
| SwissProt_51.6.fasta                                      |                                                                                             |           | 0                     | 0                     | 0                           | 0                           |
| 257964                                                    |                                                                                             |           | 0                     | 0                     | 0                           | 0                           |
| 93947433                                                  |                                                                                             |           | 0                     | 0                     | 0                           | 0                           |
| 12420                                                     |                                                                                             |           | 0                     | 0                     | 0                           | 0                           |
| 33749                                                     |                                                                                             |           | 0                     | 0                     | 0                           | 0                           |
| -----                                                     |                                                                                             |           | 0                     | 0                     | 0                           | 0                           |
| Name                                                      | Delta                                                                                       |           | 0                     | 0                     | 0                           | 0                           |
| Oxidation (N)                                             | 15.994919                                                                                   | 0         | 63.998285             | 63.998285             | 0                           | 0                           |
| -----                                                     |                                                                                             |           | 0                     | 0                     | 0                           | 0                           |
| ..... Mus musculus (house mouse)                          |                                                                                             |           | 0                     | 0                     | 0                           | 0                           |
| Trypsin                                                   |                                                                                             |           | 0                     | 0                     | 0                           | 0                           |
| 1                                                         |                                                                                             |           | 0                     | 0                     | 0                           | 0                           |
| Carbamidomethyl (C)                                       |                                                                                             |           | 0                     | 0                     | 0                           | 0                           |
| None                                                      |                                                                                             |           | 0                     | 0                     | 0                           | 0                           |
| Oxidation (M)                                             |                                                                                             |           | 0                     | 0                     | 0                           | 0                           |
| 5                                                         |                                                                                             |           | 0                     | 0                     | 0                           | 0                           |
| ppm                                                       |                                                                                             |           | 0                     | 0                     | 0                           | 0                           |
| 1                                                         |                                                                                             |           | 0                     | 0                     | 0                           | 0                           |
| Da                                                        |                                                                                             |           | 0                     | 0                     | 0                           | 0                           |
| Monoisotopic                                              |                                                                                             |           | 0                     | 0                     | 0                           | 0                           |
| Default                                                   |                                                                                             |           | 0                     | 0                     | 0                           | 0                           |
| 0                                                         |                                                                                             |           | 0                     | 0                     | 0                           | 0                           |
| -----                                                     |                                                                                             |           | 0                     | 0                     | 0                           | 0                           |
| 0.05                                                      |                                                                                             |           | 0                     | 0                     | 0                           | 0                           |
| 0                                                         |                                                                                             |           | 0                     | 0                     | 0                           | 0                           |
| 1                                                         |                                                                                             |           | 0                     | 0                     | 0                           | 0                           |
| 0                                                         |                                                                                             |           | 0                     | 0                     | 0                           | 0                           |
| 0                                                         |                                                                                             |           | 0                     | 0                     | 0                           | 0                           |
| 0                                                         |                                                                                             |           | 0                     | 0                     | 0                           | 0                           |
| 0                                                         |                                                                                             |           | 0                     | 0                     | 0                           | 0                           |
| 0                                                         |                                                                                             |           | 0                     | 0                     | 0                           | 0                           |
| 0                                                         |                                                                                             |           | 0                     | 0                     | 0                           | 0                           |
| Q04447                                                    | Creatine kinase B-type (EC 2.7.3.2) (Creatine kinase B chain) (B-CK) - Mus musculus (Mouse) | 42971     | 9079                  | 7277                  | 434                         | 406                         |
| P60710                                                    | Actin, cytoplasmic 1 (Beta-actin) - Mus musculus (Mouse)                                    | 42052     | 5140                  | 4496                  | 282                         | 208                         |

|        |                                                                                                                                                                                                                                                           |        |      |      |     |     |
|--------|-----------------------------------------------------------------------------------------------------------------------------------------------------------------------------------------------------------------------------------------------------------|--------|------|------|-----|-----|
| P68033 | Actin, alpha cardiac muscle 1 (Alpha-cardiac actin) - Mus musculus (Mouse)                                                                                                                                                                                | 42334  | 3948 | 2726 | 234 | 155 |
| P11499 | Heat shock protein HSP 90-beta (HSP 84) (Tumor-specific transplantation 84 kDa antigen) (TSTA) - Mus musculus (Mouse)                                                                                                                                     | 83615  | 2943 | 3523 | 208 | 205 |
| P10126 | Elongation factor 1-alpha 1 (EF-1-alpha-1) (Elongation factor 1 A-1) (eEF1A-1) (Elongation factor Tu) (EF-Tu) - Mus musculus (Mouse)                                                                                                                      | 50424  | 2004 | 2344 | 305 | 330 |
| P52480 | Pyruvate kinase isozyme M2 (EC 2.7.1.40) - Mus musculus (Mouse)                                                                                                                                                                                           | 58420  | 1954 | 3481 | 138 | 233 |
| P19096 | Fatty acid synthase (EC 2.3.1.85) [Includes: [Acyl-carrier-protein] S-acetyltransferase (EC 2.3.1.38); [Acyl-carrier-protein] S-malonyltransferase (EC 2.3.1.39); 3-oxoacyl-[acyl-carrier-protein] synthase (EC 2.3.1.41); 3-oxoacyl-[acyl-carrier-protei | 274994 | 1869 | 1524 | 163 | 135 |
| P20152 | Vimentin - Mus musculus (Mouse)                                                                                                                                                                                                                           | 53712  | 1749 | 2397 | 125 | 157 |
| P63017 | Heat shock cognate 71 kDa protein (Heat shock 70 kDa protein 8) - Mus musculus (Mouse)                                                                                                                                                                    | 71055  | 1719 | 959  | 119 | 70  |
| P58252 | Elongation factor 2 (EF-2) - Mus musculus (Mouse)                                                                                                                                                                                                         | 96222  | 1630 | 1718 | 128 | 126 |
| P07901 | Heat shock protein HSP 90-alpha (HSP 86) (Tumor-specific transplantation 86 kDa antigen) (TSTA) - Mus musculus (Mouse)                                                                                                                                    | 85134  | 1529 | 2324 | 134 | 146 |
| P16858 | Glyceraldehyde-3-phosphate dehydrogenase (EC 1.2.1.12) (GAPDH) - Mus musculus (Mouse)                                                                                                                                                                     | 36072  | 1514 | 1781 | 84  | 89  |
| Q9CWF2 | Tubulin beta-2B chain - Mus musculus (Mouse)                                                                                                                                                                                                              | 50377  | 1435 | 825  | 86  | 59  |
| Q7TMM9 | Tubulin beta-2A chain - Mus musculus (Mouse)                                                                                                                                                                                                              | 50274  | 1422 | 775  | 83  | 52  |
| P02551 | Tubulin alpha-1 chain (Alpha-tubulin 1) (Alpha-tubulin isotype M-alpha-1) - Mus musculus (Mouse)                                                                                                                                                          | 50788  | 1385 | 1867 | 75  | 114 |

|        |                                                                                                                                           |       |      |      |     |     |
|--------|-------------------------------------------------------------------------------------------------------------------------------------------|-------|------|------|-----|-----|
| P63101 | 14-3-3 protein zeta/delta (Protein kinase C inhibitor protein 1) (KCIP-1) (SEZ-2) - Mus musculus (Mouse)                                  | 27925 | 1383 | 1947 | 96  | 120 |
| P99024 | Tubulin beta-5 chain - Mus musculus (Mouse)                                                                                               | 50095 | 1377 | 976  | 88  | 60  |
| P68372 | Tubulin beta-2C chain - Mus musculus (Mouse)                                                                                              | 50255 | 1300 | 891  | 78  | 51  |
| P62631 | Elongation factor 1-alpha 2 (EF-1-alpha-2) (Elongation factor 1 A-2) (eEF1A-2) (Statin S1) - Mus musculus (Mouse)                         | 50764 | 1275 | 1549 | 258 | 285 |
| P05216 | Tubulin alpha-6 chain (Alpha-tubulin 6) (Alpha-tubulin isotype M-alpha-6) - Mus musculus (Mouse)                                          | 50562 | 1259 | 0    | 72  | 0   |
| P05213 | Tubulin alpha-2 chain (Alpha-tubulin 2) (Alpha-tubulin isotype M-alpha-2) - Mus musculus (Mouse)                                          | 50804 | 1247 | 0    | 72  | 0   |
| P62259 | 14-3-3 protein epsilon (14-3-3E) - Mus musculus (Mouse)                                                                                   | 29326 | 1202 | 998  | 116 | 95  |
| P05214 | Tubulin alpha-3/alpha-7 chain (Alpha-tubulin 3/7) (Alpha-tubulin isotype M-alpha-3/7) - Mus musculus (Mouse)                              | 50612 | 1112 | 1288 | 61  | 84  |
| P68254 | 14-3-3 protein theta (14-3-3 protein tau) - Mus musculus (Mouse)                                                                          | 28046 | 1104 | 994  | 92  | 91  |
| P10649 | Glutathione S-transferase Mu 1 (EC 2.5.1.18) (GST class-mu 1) (Glutathione S-transferase GT8.7) (pmGT10) (GST 1-1) - Mus musculus (Mouse) | 26067 | 1081 | 522  | 61  | 31  |
| P06151 | L-lactate dehydrogenase A chain (EC 1.1.1.27) (LDH-A) (LDH muscle subunit) (LDH-M) - Mus musculus (Mouse)                                 | 36817 | 1033 | 421  | 74  | 57  |
| Q9CQV8 | 14-3-3 protein beta/alpha (Protein kinase C inhibitor protein 1) (KCIP-1) - Mus musculus (Mouse)                                          | 28183 | 983  | 971  | 71  | 80  |
| P17182 | Alpha-enolase (EC 4.2.1.11) (2-phospho-D-glycerate hydrolyase) (Non-neural enolase) (NNE) (Enolase 1) - Mus musculus (Mouse)              | 47453 | 976  | 802  | 62  | 50  |
| P17156 | Heat shock-related 70 kDa protein 2 (Heat shock protein 70.2) - Mus musculus (Mouse)                                                      | 69983 | 964  | 544  | 60  | 37  |

|        |                                                                                                                                                                                                                                         |        |     |      |     |     |
|--------|-----------------------------------------------------------------------------------------------------------------------------------------------------------------------------------------------------------------------------------------|--------|-----|------|-----|-----|
| P18760 | Cofilin-1 (Cofilin, non-muscle isoform) - Mus musculus (Mouse)                                                                                                                                                                          | 18776  | 959 | 2552 | 70  | 122 |
| Q68FD5 | Clathrin heavy chain - Mus musculus (Mouse)                                                                                                                                                                                             | 193202 | 944 | 884  | 88  | 78  |
| P51880 | Fatty acid-binding protein, brain (B-FABP) (Brain lipid-binding protein) (BLBP) - Mus musculus (Mouse)                                                                                                                                  | 15169  | 933 | 856  | 31  | 38  |
| Q99PT1 | Rho GDP-dissociation inhibitor 1 (Rho GDI 1) (Rho-GDI alpha) (GDI-1) - Mus musculus (Mouse)                                                                                                                                             | 23450  | 923 | 675  | 37  | 31  |
| P97351 | 40S ribosomal protein S3a - Mus musculus (Mouse)                                                                                                                                                                                        | 30094  | 899 | 392  | 50  | 26  |
| Q9D6F9 | Tubulin beta-4 chain - Mus musculus (Mouse)                                                                                                                                                                                             | 49976  | 888 | 493  | 58  | 31  |
| P17742 | Peptidyl-prolyl cis-trans isomerase A (EC 5.2.1.8) (PPlase A) (Rotamase A) (Cyclophilin A) (Cyclosporin A-binding protein) (SP18) - Mus musculus (Mouse)                                                                                | 18131  | 855 | 1549 | 38  | 66  |
| P35700 | Peroxiredoxin-1 (EC 1.11.1.15) (Thioredoxin peroxidase 2) (Thioredoxin-dependent peroxide reductase 2) (Osteoblast-specific factor 3) (OSF-3) (Macrophage 23 kDa stress protein) - Mus musculus (Mouse)                                 | 22390  | 836 | 1095 | 75  | 99  |
| Q9JHU4 | Dynein heavy chain, cytosolic (DYHC) (Cytoplasmic dynein heavy chain 1) (DHC1) (Dynein heavy chain 1, cytoplasmic 1) - Mus musculus (Mouse)                                                                                             | 534427 | 822 | 395  | 157 | 123 |
| P62806 | Histone H4 - Mus musculus (Mouse)                                                                                                                                                                                                       | 11360  | 815 | 1617 | 47  | 78  |
| Q8VDD5 | Myosin-9 (Myosin heavy chain 9) (Myosin heavy chain, nonmuscle IIa) (Nonmuscle myosin heavy chain IIa) (NMMHC II-a) (NMMHC-IIA) (Cellular myosin heavy chain, type A) (Nonmuscle myosin heavy chain-A) (NMMHC-A) - Mus musculus (Mouse) | 227414 | 780 | 839  | 127 | 115 |
| Q9ERD7 | Tubulin beta-3 chain - Mus musculus (Mouse)                                                                                                                                                                                             | 50842  | 780 | 383  | 52  | 27  |
| P62908 | 40S ribosomal protein S3 - Mus musculus (Mouse)                                                                                                                                                                                         | 26828  | 778 | 762  | 39  | 44  |

|         |                                                                                                                                                                          |        |     |      |     |    |
|---------|--------------------------------------------------------------------------------------------------------------------------------------------------------------------------|--------|-----|------|-----|----|
| P09405  | Nucleolin (Protein C23) - Mus musculus (Mouse)                                                                                                                           | 76734  | 775 | 872  | 78  | 65 |
| P62827  | GTP-binding nuclear protein Ran (GTPase Ran) (Ras-like protein TC4) - Mus musculus                                                                                       | 24579  | 756 | 656  | 38  | 36 |
| P47963  | 60S ribosomal protein L13 (A52) - Mus musculus (Mouse)                                                                                                                   | 24348  | 744 | 379  | 47  | 27 |
| P68510  | 14-3-3 protein eta - Mus musculus (Mouse)                                                                                                                                | 28365  | 707 | 962  | 58  | 80 |
| P17751  | Triosephosphate isomerase (EC 5.3.1.1) (TIM) (Triose-phosphate isomerase) - Mus musculus (Mouse)                                                                         | 27038  | 706 | 519  | 35  | 25 |
| Q01853  | Transitional endoplasmic reticulum ATPase (TER ATPase) (15S Mg(2+)-ATPase p97 subunit) (Valosin-containing protein) (VCP) - Mus musculus (Mouse)                         | 89936  | 691 | 699  | 56  | 51 |
| Q02053  | Ubiquitin-activating enzyme E1 X (Ubiquitin-activating enzyme E1) - Mus musculus (Mouse)                                                                                 | 118931 | 660 | 1086 | 63  | 55 |
| P61982  | 14-3-3 protein gamma - Mus musculus (Mouse)                                                                                                                              | 28456  | 653 | 841  | 53  | 79 |
| Q9DBJ1  | Phosphoglycerate mutase 1 (EC 5.4.2.1) (EC 5.4.2.4) (EC 3.1.3.13) (Phosphoglycerate mutase isozyme B) (PGAM-B) (BPG-dependent PGAM 1) - Mus musculus (Mouse)             | 28928  | 612 | 746  | 35  | 31 |
| Q922F4  | Tubulin beta-6 chain - Mus musculus (Mouse)                                                                                                                              | 50514  | 583 | 382  | 40  | 21 |
| O70456  | 14-3-3 protein sigma (Stratifin) - Mus musculus (Mouse)                                                                                                                  | 27810  | 573 | 666  | 56  | 71 |
| Q61171  | Peroxiredoxin-2 (EC 1.11.1.15) (Thioredoxin peroxidase 1) (Thioredoxin-dependent peroxide reductase 1) (Thiol-specific antioxidant protein) (TSA) - Mus musculus (Mouse) | 21936  | 568 | 898  | 47  | 55 |
| Q61820  | GTP-binding nuclear protein Ran, testis-specific isoform - Mus musculus (Mouse)                                                                                          | 24608  | 564 | 570  | 23  | 24 |
| P40142  | Transketolase (EC 2.2.1.1) (TK) (P68) - Mus musculus (Mouse)                                                                                                             | 68272  | 562 | 250  | 117 | 75 |
| Q6Z WV3 | 60S ribosomal protein L10 (QM protein homolog) - Mus musculus (Mouse)                                                                                                    | 25044  | 556 | 148  | 29  | 13 |
| P07724  | Serum albumin precursor - Mus musculus (Mouse)                                                                                                                           | 70700  | 550 | 572  | 22  | 21 |

|        |                                                                                                                                                                                    |       |     |     |    |    |
|--------|------------------------------------------------------------------------------------------------------------------------------------------------------------------------------------|-------|-----|-----|----|----|
| P68040 | Guanine nucleotide-binding protein subunit beta 2-like 1 (Receptor of activated protein kinase C 1) (RACK1) (Receptor for activated C kinase) (p205) (12-3) - Mus musculus (Mouse) | 35511 | 541 | 153 | 35 | 24 |
| P70296 | Phosphatidylethanolamine-binding protein 1 (PEBP-1) (HCNPpp) [Contains: Hippocampal cholinergic neurostimulating peptide (HCNP)] - Mus musculus (Mouse)                            | 20988 | 532 | 730 | 25 | 33 |
| P45591 | Cofilin-2 (Cofilin, muscle isoform) - Mus musculus (Mouse)                                                                                                                         | 18812 | 528 | 431 | 39 | 38 |
| Q9CR57 | 60S ribosomal protein L14 - Mus musculus (Mouse)                                                                                                                                   | 23663 | 508 | 391 | 33 | 24 |
| Q6GSS7 | Histone H2A type 2-A (H2A.2) (H2a-614) (H2a-615) - Mus musculus (Mouse)                                                                                                            | 14087 | 505 | 763 | 18 | 21 |
| P14152 | Malate dehydrogenase, cytoplasmic (EC 1.1.1.37) (Cytosolic malate dehydrogenase) - Mus musculus (Mouse)                                                                            | 36659 | 495 | 300 | 45 | 22 |
| P62242 | 40S ribosomal protein S8 - Mus musculus (Mouse)                                                                                                                                    | 24475 | 479 | 372 | 18 | 19 |
| P19157 | Glutathione S-transferase P 1 (EC 2.5.1.18) (GST YF-YF) (GST-piB) (GST class-pi) (Gst P1) (Preadipocyte growth factor) - Mus musculus (Mouse)                                      | 23765 | 473 | 572 | 10 | 16 |
| P63325 | 40S ribosomal protein S10 - Mus musculus (Mouse)                                                                                                                                   | 18904 | 468 | 168 | 42 | 33 |
| Q6ZWN5 | 40S ribosomal protein S9 - Mus musculus (Mouse)                                                                                                                                    | 22635 | 459 | 248 | 47 | 40 |
| P09411 | Phosphoglycerate kinase 1 (EC 2.7.2.3) - Mus musculus (Mouse)                                                                                                                      | 44907 | 448 | 136 | 45 | 19 |
| Q64475 | Histone H2B type 1-P - Mus musculus (Mouse)                                                                                                                                        | 13984 | 436 | 999 | 46 | 77 |
| Q8CGP2 | Histone H2B type 1-B (h2B-143) - Mus musculus (Mouse)                                                                                                                              | 13944 | 436 | 999 | 46 | 75 |
| Q64525 | Histone H2B type 2-B (H2b 616) - Mus musculus (Mouse)                                                                                                                              | 13912 | 436 | 0   | 43 | 0  |
| Q9JJZ2 | Tubulin alpha-8 chain (Alpha-tubulin 8) - Mus musculus (Mouse)                                                                                                                     | 50704 | 428 | 841 | 25 | 50 |
| P47962 | 60S ribosomal protein L5 - Mus musculus (Mouse)                                                                                                                                    | 34607 | 419 | 120 | 29 | 13 |

|        |                                                                                                                                                                                |        |     |     |    |    |
|--------|--------------------------------------------------------------------------------------------------------------------------------------------------------------------------------|--------|-----|-----|----|----|
| P62702 | 40S ribosomal protein S4, X isoform - Mus musculus (Mouse)                                                                                                                     | 29807  | 402 | 304 | 30 | 23 |
| P50446 | Keratin, type II cytoskeletal 6A (Cytokeratin-6A) (CK 6A) (K6a keratin) (Keratin-6 alpha) (mK6-alpha) - Mus musculus (Mouse)                                                   | 59641  | 396 | 0   | 24 | 0  |
| Q922U2 | Keratin, type II cytoskeletal 5 (Cytokeratin-5) (CK-5) (Keratin-5) (K5) - Mus musculus (Mouse)                                                                                 | 61957  | 396 | 550 | 23 | 38 |
| Q9Z1Q9 | Valyl-tRNA synthetase (EC 6.1.1.9) (Valine--tRNA ligase) (ValRS) (Protein G7a) - Mus musculus (Mouse)                                                                          | 141439 | 380 | 302 | 37 | 32 |
| Q61316 | Heat shock 70 kDa protein 4 (Heat shock 70-related protein APG-2) - Mus musculus (Mouse)                                                                                       | 94872  | 379 | 792 | 42 | 52 |
| Q99MD9 | Nuclear autoantigenic sperm protein (NASP) - Mus musculus (Mouse)                                                                                                              | 84188  | 365 | 293 | 34 | 27 |
| Q9CY58 | Plasminogen activator inhibitor 1 RNA-binding protein (PAI1 RNA-binding protein 1) (PAI-RBP1) (SERPINE1 mRNA-binding protein 1) - Mus musculus (Mouse)                         | 44801  | 359 | 281 | 17 | 8  |
| Q8BP67 | 60S ribosomal protein L24 - Mus musculus (Mouse)                                                                                                                               | 17882  | 354 | 214 | 24 | 19 |
| Q91V92 | ATP-citrate synthase (EC 2.3.3.8) (ATP-citrate (pro-S)-lyase) (Citrate cleavage enzyme) - Mus musculus (Mouse)                                                                 | 120564 | 349 | 488 | 45 | 43 |
| Q05816 | Fatty acid-binding protein, epidermal (E-FABP) (Psoriasis-associated fatty acid-binding protein homolog) (PA-FABP) (Keratinocyte lipid-binding protein) - Mus musculus (Mouse) | 15470  | 331 | 206 | 18 | 15 |
| P16627 | Heat shock 70 kDa protein 1L (Heat shock 70 kDa protein 1-like) (Heat shock 70 kDa-like protein 1) (Spermatid-specific heat shock protein 70) - Mus musculus (Mouse)           | 70992  | 319 | 238 | 33 | 25 |
| P16125 | L-lactate dehydrogenase B chain (EC 1.1.1.27) (LDH-B) (LDH heart subunit) (LDH-H) - Mus musculus (Mouse)                                                                       | 36834  | 315 | 214 | 34 | 21 |

|        |                                                                                                                                                                            |       |     |     |     |     |
|--------|----------------------------------------------------------------------------------------------------------------------------------------------------------------------------|-------|-----|-----|-----|-----|
| P21550 | Beta-enolase (EC 4.2.1.11) (2-phospho-D-glycerate hydro-lyase) (Muscle-specific enolase) (MSE) (Skeletal muscle enolase) (Enolase 3) - Mus musculus (Mouse)                | 47337 | 313 | 146 | 30  | 26  |
| Q8C3X4 | GTP-binding protein GUF1 homolog - Mus musculus (Mouse)                                                                                                                    | 72760 | 311 | 506 | 412 | 483 |
| P47911 | 60S ribosomal protein L6 (TAX-responsive enhancer element-binding protein 107) (TAXREB107) - Mus musculus (Mouse)                                                          | 33546 | 307 | 148 | 36  | 14  |
| P27661 | Histone H2A.x (H2a/x) - Mus musculus (Mouse)                                                                                                                               | 15133 | 301 | 426 | 15  | 19  |
| Q3THW5 | Histone H2AV (H2A.F/Z) - Mus musculus (Mouse)                                                                                                                              | 13501 | 297 | 426 | 11  | 16  |
| O08553 | Dihydropyrimidinase-related protein 2 (DRP-2) (ULIP 2 protein) - Mus musculus (Mouse)                                                                                      | 62638 | 282 | 104 | 32  | 13  |
| P80318 | T-complex protein 1 subunit gamma (TCP-1-gamma) (CCT-gamma) (Matricin) (mTRiC-P5) - Mus musculus (Mouse)                                                                   | 61162 | 282 | 49  | 28  | 14  |
| O08807 | Peroxiredoxin-4 (EC 1.11.1.15) (Prx-IV) (Thioredoxin peroxidase AO372) (Thioredoxin-dependent peroxide reductase A0372) (Antioxidant enzyme AOE372) - Mus musculus (Mouse) | 31261 | 273 | 421 | 25  | 34  |
| P17918 | Proliferating cell nuclear antigen (PCNA) (Cyclin) - Mus musculus (Mouse)                                                                                                  | 29108 | 273 | 207 | 20  | 11  |
| Q61696 | Heat shock 70 kDa protein 1A (Heat shock 70 kDa protein 3) (HSP70.3) (Hsp68) - Mus musculus (Mouse)                                                                        | 70321 | 266 | 236 | 33  | 24  |
| P20029 | 78 kDa glucose-regulated protein precursor (GRP 78) (Heat shock 70 kDa protein 5) (Immunoglobulin heavy chain-binding protein) (BiP) - Mus musculus (Mouse)                | 72492 | 262 | 312 | 25  | 21  |
| Q60864 | Stress-induced-phosphoprotein 1 (STI1) (Hsc70/Hsp90-organizing protein) (Hop) (mSTI1) - Mus musculus (Mouse)                                                               | 63170 | 257 | 245 | 19  | 21  |



|        |                                                                                                                                                              |        |     |      |    |    |
|--------|--------------------------------------------------------------------------------------------------------------------------------------------------------------|--------|-----|------|----|----|
| Q8BTM8 | Filamin-A (Alpha-filamin) (Filamin-1) (Endothelial actin-binding protein) (Actin-binding protein 280) (ABP-280) (Nonmuscle filamin) - Mus musculus (Mouse)   | 283869 | 254 | 1031 | 46 | 86 |
| P02535 | Keratin, type I cytoskeletal 10 (Cytokeratin-10) (CK-10) (Keratin-10) (K10) (56 kDa cyokeratin) (Keratin, type I cytoskeletal 59 kDa) - Mus musculus (Mouse) | 57906  | 252 | 152  | 19 | 17 |
| P60843 | Eukaryotic initiation factor 4A-I (EC 3.6.1.-) (ATP-dependent RNA helicase eIF4A-1) (eIF4A-I) (eIF-4A-I) - Mus musculus (Mouse)                              | 46353  | 251 | 112  | 21 | 10 |
| P61164 | Alpha-centractin (Centractin) (Centrosome-associated actin homolog) (Actin-RPV) (ARP1) - Mus musculus (Mouse)                                                | 42701  | 247 | 124  | 27 | 18 |
| P61161 | Actin-like protein 2 (Actin-related protein 2) - Mus musculus (Mouse)                                                                                        | 45017  | 247 | 124  | 28 | 18 |
| P62717 | 60S ribosomal protein L18a - Mus musculus (Mouse)                                                                                                            | 21004  | 242 | 62   | 21 | 13 |
| P80316 | T-complex protein 1 subunit epsilon (TCP-1-epsilon) (CCT-epsilon) - Mus musculus (Mouse)                                                                     | 60042  | 239 | 102  | 17 | 14 |
| Q07813 | Apoptosis regulator BAX, membrane isoform alpha - Mus musculus (Mouse)                                                                                       | 21495  | 238 | 117  | 14 | 5  |
| Q8BGD9 | Eukaryotic translation initiation factor 4B (eIF-4B) - Mus musculus (Mouse)                                                                                  | 68970  | 238 | 306  | 13 | 16 |
| Q9WVA4 | Transgelin-2 - Mus musculus (Mouse)                                                                                                                          | 23810  | 234 | 56   | 14 | 3  |
| P17183 | Gamma-enolase (EC 4.2.1.11) (2-phospho-D-glycerate hydrolyase) (Neural enolase) (Neuron-specific enolase) (NSE) (Enolase 2) - Mus musculus (Mouse)           | 47609  | 228 | 181  | 12 | 15 |
| P61979 | Heterogeneous nuclear ribonucleoprotein K - Mus musculus (Mouse)                                                                                             | 51230  | 225 | 46   | 18 | 12 |
| Q9CZM2 | 60S ribosomal protein L15 - Mus musculus (Mouse)                                                                                                             | 24245  | 225 | 107  | 21 | 18 |
| P62843 | 40S ribosomal protein S15 (RIG protein) - Mus musculus (Mouse)                                                                                               | 17029  | 223 | 43   | 15 | 6  |

|        |                                                                                                                                                                                                                  |        |     |     |    |    |
|--------|------------------------------------------------------------------------------------------------------------------------------------------------------------------------------------------------------------------|--------|-----|-----|----|----|
| P27924 | Ubiquitin-conjugating enzyme E2-25 kDa (EC 6.3.2.19) (Ubiquitin-protein ligase) (Ubiquitin carrier protein) (E2(25K)) (Huntingtin-interacting protein 2) (HIP-2) - Mus musculus (Mouse)                          | 22507  | 222 | 88  | 11 | 6  |
| P08113 | Endoplasmic precursor (Heat shock protein 90 kDa beta member 1) (94 kDa glucose-regulated protein) (GRP94) (ERP99) (Polymorphic tumor rejection antigen 1) (Tumor rejection antigen gp96) - Mus musculus (Mouse) | 92703  | 221 | 298 | 25 | 27 |
| Q6ZQ38 | Cullin-associated NEDD8-dissociated protein 1 (Cullin-associated and neddylation-dissociated protein 1) (p120 CAND1) - Mus musculus (Mouse)                                                                      | 137955 | 221 | 246 | 33 | 27 |
| P62137 | Serine/threonine-protein phosphatase PP1-alpha catalytic subunit (EC 3.1.3.16) (PP-1A) - Mus musculus (Mouse)                                                                                                    | 38257  | 219 | 0   | 6  | 0  |
| P25444 | 40S ribosomal protein S2 (S4) (LLRep3 protein) - Mus musculus (Mouse)                                                                                                                                            | 31497  | 217 | 50  | 26 | 19 |
| O70250 | Phosphoglycerate mutase 2 (EC 5.4.2.1) (EC 5.4.2.4) (EC 3.1.3.13) (Phosphoglycerate mutase isozyme M) (PGAM-M) (BPG-dependent PGAM 2) (Muscle-specific phosphoglycerate mutase) - Mus musculus (Mouse)           | 28980  | 212 | 160 | 13 | 6  |
| P58044 | Isopentenyl-diphosphate Delta-isomerase 1 (EC 5.3.3.2) (IPP isomerase 1) (Isopentenyl pyrophosphate isomerase 1) (IPPI1) - Mus musculus (Mouse)                                                                  | 26615  | 211 | 0   | 8  | 0  |
| P05064 | Fructose-bisphosphate aldolase A (EC 4.1.2.13) (Muscle-type aldolase) (Aldolase 1) - Mus musculus (Mouse)                                                                                                        | 39787  | 211 | 567 | 36 | 46 |
| O08638 | Myosin-11 (Myosin heavy chain 11) (Myosin heavy chain, smooth muscle isoform) (SMMHC) - Mus musculus (Mouse)                                                                                                     | 227743 | 211 | 221 | 79 | 76 |

|        |                                                                                                                                                                                    |        |     |     |    |    |
|--------|------------------------------------------------------------------------------------------------------------------------------------------------------------------------------------|--------|-----|-----|----|----|
| P62270 | 40S ribosomal protein S18 (Ke3) (Ke3) - Mus musculus (Mouse)                                                                                                                       | 17708  | 210 | 209 | 15 | 17 |
| P35979 | 60S ribosomal protein L12 - Mus musculus (Mouse)                                                                                                                                   | 17965  | 208 | 389 | 14 | 12 |
| P68433 | Histone H3.1 - Mus musculus (Mouse)                                                                                                                                                | 15509  | 208 | 0   | 37 | 0  |
| P84244 | Histone H3.3 - Mus musculus (Mouse)                                                                                                                                                | 15376  | 208 | 0   | 37 | 0  |
| Q9CZX8 | 40S ribosomal protein S19 - Mus musculus (Mouse)                                                                                                                                   | 16076  | 206 | 146 | 19 | 11 |
| P30275 | Creatine kinase, ubiquitous mitochondrial precursor (EC 2.7.3.2) (U-MtCK) (Mia-CK) (Acidic-type mitochondrial creatine kinase) - Mus musculus (Mouse)                              | 47373  | 205 | 121 | 32 | 30 |
| P23116 | Eukaryotic translation initiation factor 3 subunit 10 (eIF-3 theta) (eIF3 p167) (eIF3 p180) (eIF3 p185) (eIF3a) (p162 protein) (Centrosomin) - Mus musculus (Mouse)                | 162251 | 199 | 166 | 58 | 56 |
| P42932 | T-complex protein 1 subunit theta (TCP-1-theta) (CCT-theta) - Mus musculus (Mouse)                                                                                                 | 60088  | 197 | 57  | 23 | 15 |
| Q9CQN1 | Heat shock protein 75 kDa, mitochondrial precursor (HSP 75) (Tumor necrosis factor type 1 receptor-associated protein) (TRAP-1) (TNFR-associated protein 1) - Mus musculus (Mouse) | 80501  | 197 | 335 | 13 | 11 |
| P10630 | Eukaryotic initiation factor 4A-II (EC 3.6.1.-) (ATP-dependent RNA helicase eIF4A-2) (eIF4A-II) (eIF-4A-II) - Mus musculus (Mouse)                                                 | 46601  | 194 | 78  | 17 | 10 |
| P27659 | 60S ribosomal protein L3 (J1 protein) - Mus musculus (Mouse)                                                                                                                       | 46380  | 192 | 75  | 25 | 18 |
| P49722 | Proteasome subunit alpha type 2 (EC 3.4.25.1) (Proteasome component C3) (Macropain subunit C3) (Multicatalytic endopeptidase complex subunit C3) - Mus musculus (Mouse)            | 26023  | 188 | 103 | 16 | 9  |
| Q9CPR4 | 60S ribosomal protein L17 (L23) - Mus musculus (Mouse)                                                                                                                             | 21637  | 187 | 135 | 15 | 14 |
| P51410 | 60S ribosomal protein L9 - Mus musculus (Mouse)                                                                                                                                    | 21982  | 187 | 212 | 17 | 12 |

|        |                                                                                                                                                                                                                                     |        |     |     |    |    |
|--------|-------------------------------------------------------------------------------------------------------------------------------------------------------------------------------------------------------------------------------------|--------|-----|-----|----|----|
| Q8BKC5 | Importin beta-3 (Karyopherin beta-3) (Ran-binding protein 5) (RanBP5) - Mus musculus (Mouse)                                                                                                                                        | 124993 | 185 | 91  | 12 | 13 |
| Q9CWS0 | NG,NG-dimethylarginine dimethylaminohydrolase 1 (EC 3.5.3.18) (Dimethylargininase-1) (Dimethylarginine dimethylaminohydrolase 1) (DDAHI) (DDAH-1) - Mus musculus (Mouse)                                                            | 31760  | 185 | 51  | 18 | 7  |
| Q62093 | Splicing factor, arginine/serine-rich 2 (Splicing factor SC35) (SC35) (Splicing component, 35 kDa) (Protein PR264) (Putative myelin regulatory factor 1) (MRF-1) - Mus musculus (Mouse)                                             | 25461  | 184 | 117 | 15 | 19 |
| P15626 | Glutathione S-transferase Mu 2 (EC 2.5.1.18) (GST class-mu 2) (Glutathione S-transferase pmGT2) (GST 5-5) - Mus musculus (Mouse)                                                                                                    | 25871  | 183 | 80  | 22 | 11 |
| Q8BGQ7 | Alanyl-tRNA synthetase, cytoplasmic (EC 6.1.1.7) (Alanine--tRNA ligase) (AlaRS) - Mus musculus (Mouse)                                                                                                                              | 107697 | 179 | 216 | 23 | 22 |
| P62141 | Serine/threonine-protein phosphatase PP1-beta catalytic subunit (EC 3.1.3.16) (PP-1B) - Mus musculus (Mouse)                                                                                                                        | 37961  | 177 | 57  | 4  | 4  |
| Q9CPU0 | Lactoylglutathione lyase (EC 4.4.1.5) (Methylglyoxalase) (Aldoketomutase) (Glyoxalase I) (Glx I) (Ketone-aldehyde mutase) (S-D-lactoylglutathione methylglyoxal lyase) - Mus musculus (Mouse)                                       | 20967  | 174 | 141 | 17 | 8  |
| P31001 | Desmin - Mus musculus (Mouse)                                                                                                                                                                                                       | 53522  | 169 | 224 | 25 | 31 |
| P10639 | Thioredoxin (Trx) (ATL-derived factor) (ADF) - Mus musculus (Mouse)                                                                                                                                                                 | 12010  | 169 | 914 | 22 | 42 |
| Q55234 | Proteasome subunit beta type 5 precursor (EC 3.4.25.1) (Proteasome epsilon chain) (Macropain epsilon chain) (Multicatalytic endopeptidase complex epsilon chain) (Proteasome subunit X) (Proteasome chain 6) - Mus musculus (Mouse) | 23123  | 168 | 227 | 10 | 11 |

|        |                                                                                                                                                                                                                  |        |     |     |    |    |
|--------|------------------------------------------------------------------------------------------------------------------------------------------------------------------------------------------------------------------|--------|-----|-----|----|----|
| P14824 | Annexin A6 (Annexin VI)<br>(Lipocortin VI) (P68) (P70)<br>(Protein III) (Chromobindin-20)<br>(67 kDa calelectrin)<br>(Calphobindin-II) (CPB-II) - Mus<br>musculus (Mouse)                                        | 76295  | 168 | 591 | 33 | 51 |
| P62281 | 40S ribosomal protein S11 - Mus<br>musculus (Mouse)                                                                                                                                                              | 18590  | 166 | 132 | 27 | 28 |
| Q62188 | Dihydropyrimidinase-related<br>protein 3 (DRP-3) (Unc-33-like<br>phosphoprotein) (ULIP protein) -<br>Mus musculus (Mouse)                                                                                        | 62296  | 165 | 0   | 11 | 0  |
| P45376 | Aldose reductase (EC 1.1.1.21)<br>(AR) (Aldehyde reductase) -<br>Mus musculus (Mouse)                                                                                                                            | 36052  | 163 | 37  | 16 | 8  |
| P62264 | 40S ribosomal protein S14 - Mus<br>musculus (Mouse)                                                                                                                                                              | 16434  | 163 | 166 | 15 | 11 |
| P09041 | Phosphoglycerate kinase, testis<br>specific (EC 2.7.2.3) - Mus<br>musculus (Mouse)                                                                                                                               | 45253  | 162 | 73  | 17 | 10 |
| Q99K85 | Phosphoserine<br>aminotransferase (EC 2.6.1.52)<br>(PSAT) (Endometrial<br>progesterone-induced protein)<br>(EPIP) - Mus musculus (Mouse)                                                                         | 40732  | 162 | 541 | 16 | 24 |
| P31254 | Ubiquitin-activating enzyme E1<br>Y (Ubiquitin-activating enzyme<br>E1) - Mus musculus (Mouse)                                                                                                                   | 119388 | 161 | 77  | 22 | 17 |
| P80317 | T-complex protein 1 subunit zeta<br>(TCP-1-zeta) (CCT-zeta) (CCT-<br>zeta-1) - Mus musculus (Mouse)                                                                                                              | 58424  | 160 | 52  | 22 | 13 |
| P14131 | 40S ribosomal protein S16 - Mus<br>musculus (Mouse)                                                                                                                                                              | 16549  | 160 | 126 | 19 | 16 |
| P48774 | Glutathione S-transferase Mu 5<br>(EC 2.5.1.18) (GST class-mu 5)<br>(Fibrous sheath component 2)<br>(Fsc2) - Mus musculus (Mouse)                                                                                | 27016  | 160 | 82  | 18 | 9  |
| O88844 | Isocitrate dehydrogenase<br>[NADP] cytoplasmic (EC<br>1.1.1.42) (Cytosolic NADP-<br>isocitrate dehydrogenase)<br>(Oxalosuccinate decarboxylase)<br>(IDH) (NADP(+)-specific ICDH)<br>(IDP) - Mus musculus (Mouse) | 47030  | 155 | 163 | 15 | 8  |
| P61255 | 60S ribosomal protein L26<br>(Silica-induced gene 20 protein)<br>(SIG-20) - Mus musculus<br>(Mouse)                                                                                                              | 17248  | 153 | 126 | 24 | 12 |

|        |                                                                                                                                                                                                                                  |       |     |     |    |    |
|--------|----------------------------------------------------------------------------------------------------------------------------------------------------------------------------------------------------------------------------------|-------|-----|-----|----|----|
| P63158 | High mobility group protein B1 (High mobility group protein 1) (HMG-1) - Mus musculus (Mouse)                                                                                                                                    | 25049 | 153 | 405 | 25 | 38 |
| Q7TQI3 | Ubiquitin thioesterase protein OTUB1 (EC 3.4.-.-) (Otubain-1) (OTU domain-containing ubiquitin aldehyde-binding protein 1) (Ubiquitin-specific-processing protease OTUB1) (Deubiquitinating enzyme OTUB1) - Mus musculus (Mouse) | 31478 | 152 | 109 | 10 | 7  |
| Q9Z2U1 | Proteasome subunit alpha type 5 (EC 3.4.25.1) (Proteasome zeta chain) (Macropain zeta chain) (Multicatalytic endopeptidase complex zeta chain) - Mus musculus (Mouse)                                                            | 26565 | 150 | 38  | 5  | 2  |
| P15532 | Nucleoside diphosphate kinase A (EC 2.7.4.6) (NDK A) (NDP kinase A) (Tumor metastatic process-associated protein) (Metastasis inhibition factor NM23) (NDPK-A) (nm23-M1) - Mus musculus (Mouse)                                  | 17311 | 150 | 261 | 8  | 13 |
| P29391 | Ferritin light chain 1 (Ferritin L subunit 1) - Mus musculus (Mouse)                                                                                                                                                             | 20847 | 150 | 159 | 6  | 4  |
| Q9CQ60 | 6-phosphogluconolactonase (EC 3.1.1.31) (6PGL) - Mus musculus (Mouse)                                                                                                                                                            | 27465 | 148 | 41  | 11 | 11 |
| P26638 | Seryl-tRNA synthetase, cytoplasmic (EC 6.1.1.11) (Serine--tRNA ligase) (SerRS) - Mus musculus (Mouse)                                                                                                                            | 58865 | 147 | 0   | 12 | 0  |
| P70696 | Histone H2B type 1-A (Histone H2B, testis) (Testis-specific histone H2B) - Mus musculus (Mouse)                                                                                                                                  | 14285 | 146 | 378 | 37 | 51 |
| P14148 | 60S ribosomal protein L7 - Mus musculus (Mouse)                                                                                                                                                                                  | 31457 | 145 | 52  | 14 | 10 |
| P53657 | Pyruvate kinase isozymes R/L (EC 2.7.1.40) (L-PK) - Mus musculus (Mouse)                                                                                                                                                         | 62612 | 144 | 270 | 26 | 38 |
| Q8BVI4 | Dihydropteridine reductase (EC 1.5.1.34) (HDHPR) (Quinoid dihydropteridine reductase) - Mus musculus (Mouse)                                                                                                                     | 25782 | 144 | 277 | 7  | 10 |
| P08228 | Superoxide dismutase [Cu-Zn] (EC 1.15.1.1) - Mus musculus (Mouse)                                                                                                                                                                | 16104 | 143 | 32  | 8  | 4  |

|        |                                                                                                                                                                                                        |        |     |     |    |    |
|--------|--------------------------------------------------------------------------------------------------------------------------------------------------------------------------------------------------------|--------|-----|-----|----|----|
| Q76MZ3 | Serine/threonine-protein phosphatase 2A 65 kDa regulatory subunit A alpha isoform (PP2A, subunit A, PR65-alpha isoform) (PP2A, subunit A, R1-alpha isoform) - Mus musculus (Mouse)                     | 66079  | 142 | 242 | 22 | 23 |
| Q9R1Q8 | Transgelin-3 (Neuronal protein NP25) - Mus musculus (Mouse)                                                                                                                                            | 22627  | 142 | 60  | 19 | 4  |
| Q91VC3 | Probable ATP-dependent RNA helicase DDX48 (EC 3.6.1.-) (DEAD box protein 48) - Mus musculus (Mouse)                                                                                                    | 47095  | 139 | 0   | 11 | 0  |
| Q9Z1Q5 | Chloride intracellular channel protein 1 (Nuclear chloride ion channel 27) (NCC27) - Mus musculus (Mouse)                                                                                              | 27338  | 137 | 139 | 9  | 5  |
| P62918 | 60S ribosomal protein L8 - Mus musculus (Mouse)                                                                                                                                                        | 28235  | 136 | 75  | 16 | 8  |
| Q9D9P2 | Coiled-coil domain-containing protein 103 - Mus musculus (Mouse)                                                                                                                                       | 26958  | 136 | 63  | 12 | 7  |
| P26041 | Moesin (Membrane-organizing extension spike protein) - Mus musculus (Mouse)                                                                                                                            | 67839  | 136 | 127 | 44 | 39 |
| P14206 | 40S ribosomal protein SA (p40) (34/67 kDa laminin receptor) - Mus musculus (Mouse)                                                                                                                     | 32812  | 131 | 112 | 11 | 9  |
| Q8CGC7 | Bifunctional aminoacyl-tRNA synthetase [Includes: Glutamyl-tRNA synthetase (EC 6.1.1.17) (Glutamate--tRNA ligase); Prolyl-tRNA synthetase (EC 6.1.1.15) (Proline--tRNA ligase)] - Mus musculus (Mouse) | 171597 | 130 | 102 | 32 | 29 |
| Q8K045 | Serine/threonine-protein kinase N3 (EC 2.7.11.13) (Protein kinase PKN-beta) (Protein-kinase C-related kinase 3) - Mus musculus (Mouse)                                                                 | 99017  | 130 | 126 | 36 | 27 |
| Q01768 | Nucleoside diphosphate kinase B (EC 2.7.4.6) (NDK B) (NDP kinase B) (nm23-M2) (P18) - Mus musculus (Mouse)                                                                                             | 17466  | 130 | 344 | 6  | 21 |
| P62754 | 40S ribosomal protein S6 (Phosphoprotein NP33) - Mus musculus (Mouse)                                                                                                                                  | 28834  | 127 | 283 | 19 | 15 |
| P26040 | Ezrin (p81) (Cytovillin) (Villin-2) - Mus musculus (Mouse)                                                                                                                                             | 69478  | 127 | 106 | 27 | 16 |
| P26043 | Radixin (ESP10) - Mus musculus (Mouse)                                                                                                                                                                 | 68672  | 127 | 106 | 23 | 13 |

|        |                                                                                                                                                                                                                                           |        |     |     |    |    |
|--------|-------------------------------------------------------------------------------------------------------------------------------------------------------------------------------------------------------------------------------------------|--------|-----|-----|----|----|
| Q9R0Q7 | Prostaglandin E synthase 3 (EC 5.3.99.3) (Cytosolic prostaglandin E2 synthase) (cPGES) (Telomerase-binding protein p23) (Hsp90 co-chaperone) (Progesterone receptor complex p23) (Sid 3177) - Mus musculus (Mouse)                        | 18995  | 124 | 239 | 10 | 11 |
| P62900 | 60S ribosomal protein L31 - Mus musculus (Mouse)                                                                                                                                                                                          | 14454  | 124 | 62  | 12 | 7  |
| P26039 | Talin-1 - Mus musculus (Mouse)                                                                                                                                                                                                            | 271832 | 123 | 161 | 41 | 42 |
| Q61879 | Myosin-10 (Myosin heavy chain 10) (Myosin heavy chain, nonmuscle IIb) (Nonmuscle myosin heavy chain IIb) (NMMHC II-b) (NMMHC-IIb) (Cellular myosin heavy chain, type B) (Nonmuscle myosin heavy chain-B) (NMMHC-B) - Mus musculus (Mouse) | 229824 | 122 | 101 | 65 | 40 |
| Q9CWH6 | Proteasome subunit alpha type 7-like (EC 3.4.25.1) - Mus musculus (Mouse)                                                                                                                                                                 | 28020  | 121 | 0   | 11 | 0  |
| Q9Z2U0 | Proteasome subunit alpha type 7 (EC 3.4.25.1) (Proteasome subunit RC6-1) - Mus musculus (Mouse)                                                                                                                                           | 28009  | 121 | 253 | 15 | 12 |
| P54227 | Stathmin (Phosphoprotein p19) (pp19) (Oncoprotein 18) (Op18) (Leukemia-associated phosphoprotein p18) (pp17) (Prosolin) (Metablastin) (Pr22 protein) (Leukemia-associated gene protein) - Mus musculus (Mouse)                            | 17264  | 121 | 120 | 10 | 12 |
| Q61553 | Fascin (Singed-like protein) - Mus musculus (Mouse)                                                                                                                                                                                       | 55112  | 117 | 307 | 10 | 21 |
| Q9QUI0 | Transforming protein RhoA precursor - Mus musculus (Mouse)                                                                                                                                                                                | 22110  | 117 | 231 | 11 | 12 |
| P62855 | 40S ribosomal protein S26 - Mus musculus (Mouse)                                                                                                                                                                                          | 13292  | 115 | 59  | 9  | 2  |
| P14869 | 60S acidic ribosomal protein P0 (L10E) - Mus musculus (Mouse)                                                                                                                                                                             | 34366  | 115 | 334 | 28 | 20 |
| Q8VDM4 | 26S proteasome non-ATPase regulatory subunit 2 (26S proteasome regulatory subunit RPN1) (26S proteasome regulatory subunit S2) (26S proteasome subunit p97) - Mus musculus (Mouse)                                                        | 100937 | 113 | 157 | 18 | 29 |



|        |                                                                                                                                                                                                                                                 |       |     |     |    |    |
|--------|-------------------------------------------------------------------------------------------------------------------------------------------------------------------------------------------------------------------------------------------------|-------|-----|-----|----|----|
| P68037 | Ubiquitin-conjugating enzyme E2 L3 (EC 6.3.2.19) (Ubiquitin-protein ligase L3) (Ubiquitin carrier protein L3) (UbcM4) - Mus musculus (Mouse)                                                                                                    | 18021 | 112 | 50  | 8  | 3  |
| Q9QUM9 | Proteasome subunit alpha type 6 (EC 3.4.25.1) (Proteasome iota chain) (Macropain iota chain) (Multicatalytic endopeptidase complex iota chain) - Mus musculus (Mouse)                                                                           | 27811 | 112 | 225 | 18 | 5  |
| P12970 | 60S ribosomal protein L7a (Surfeit locus protein 3) - Mus musculus (Mouse)                                                                                                                                                                      | 30129 | 111 | 31  | 15 | 12 |
| P97311 | DNA replication licensing factor MCM6 (Mis5 homolog) - Mus musculus (Mouse)                                                                                                                                                                     | 93721 | 110 | 395 | 20 | 38 |
| P63073 | Eukaryotic translation initiation factor 4E (eIF4E) (eIF-4E) (mRNA cap-binding protein) (eIF-4F 25 kDa subunit) - Mus musculus (Mouse)                                                                                                          | 25266 | 110 | 25  | 9  | 5  |
| P57776 | Elongation factor 1-delta (EF-1-delta) - Mus musculus (Mouse)                                                                                                                                                                                   | 31388 | 109 | 35  | 3  | 5  |
| Q91WK2 | Eukaryotic translation initiation factor 3 subunit 3 (eIF-3 gamma) (eIF3 p40 subunit) (eIF3h) - Mus musculus (Mouse)                                                                                                                            | 39978 | 109 | 0   | 7  | 0  |
| O35711 | Liprin-beta-2 (Protein tyrosine phosphatase receptor type f polypeptide-interacting protein-binding protein 2) (PTPRF-interacting protein-binding protein 2) (Coiled-coil-like protein 1) - Mus musculus (Mouse)                                | 99260 | 108 | 79  | 14 | 20 |
| Q920E5 | Farnesyl pyrophosphate synthetase (FPP synthetase) (FPS) (Farnesyl diphosphate synthetase) (Cholesterol-regulated 39 kDa protein) (CR 39) [Includes: Dimethylallyltransferase (EC 2.5.1.1); Geranyltransferase (EC 2.5.1.10)] - Mus musculus (M | 40898 | 107 | 43  | 17 | 12 |
| P47757 | F-actin capping protein subunit beta (CapZ beta) - Mus musculus (Mouse)                                                                                                                                                                         | 31611 | 107 | 68  | 7  | 4  |

|        |                                                                                                                                                                                                                                                   |        |     |     |     |     |
|--------|---------------------------------------------------------------------------------------------------------------------------------------------------------------------------------------------------------------------------------------------------|--------|-----|-----|-----|-----|
| Q9DBP5 | UMP-CMP kinase (EC 2.7.4.14) (Cytidylate kinase) (Deoxycytidylate kinase) (Cytidine monophosphate kinase) (Uridine monophosphate/cytidine monophosphate kinase) (UMP/CMP kinase) (UMP/CMPK) (Uridine monophosphate kinase) - Mus musculus (Mouse) | 22379  | 107 | 93  | 12  | 9   |
| Q61753 | D-3-phosphoglycerate dehydrogenase (EC 1.1.1.95) (3-PGDH) (A10) - Mus musculus (Mouse)                                                                                                                                                            | 57347  | 105 | 158 | 14  | 18  |
| P62082 | 40S ribosomal protein S7 - Mus musculus (Mouse)                                                                                                                                                                                                   | 22113  | 104 | 126 | 9   | 14  |
| Q9DCH4 | Eukaryotic translation initiation factor 3 subunit 5 (eIF-3 epsilon) (eIF3 p47 subunit) (eIF3f) - Mus musculus (Mouse)                                                                                                                            | 38090  | 104 | 76  | 2   | 1   |
| Q99LD8 | NG,NG-dimethylarginine dimethylaminohydrolase 2 (EC 3.5.3.18) (Dimethylargininase-2) (Dimethylarginine dimethylaminohydrolase 2) (DDAHII) (DDAH-2) - Mus musculus (Mouse)                                                                         | 29969  | 103 | 92  | 9   | 6   |
| Q61768 | Kinesin heavy chain (Ubiquitous kinesin heavy chain) (UKHC) - Mus musculus (Mouse)                                                                                                                                                                | 110223 | 102 | 303 | 43  | 41  |
| Q9QYX7 | Protein piccolo (Aczonin) (Multidomain presynaptic cytomatrix protein) (Brain-derived HLMN protein) - Mus musculus (Mouse)                                                                                                                        | 549115 | 101 | 117 | 114 | 114 |
| P62852 | 40S ribosomal protein S25 - Mus musculus (Mouse)                                                                                                                                                                                                  | 13791  | 101 | 100 | 15  | 12  |
| Q3TXS7 | 26S proteasome non-ATPase regulatory subunit 1 (26S proteasome regulatory subunit RPN2) (26S proteasome regulatory subunit S1) - Mus musculus (Mouse)                                                                                             | 106689 | 100 | 89  | 16  | 12  |
| O35660 | Glutathione S-transferase Mu 6 (EC 2.5.1.18) (GST class-mu 6) (Glutathione-S-transferase class M5) - Mus musculus (Mouse)                                                                                                                         | 25760  | 100 | 37  | 14  | 6   |

|        |                                                                                                                                                                                                     |        |    |     |    |    |
|--------|-----------------------------------------------------------------------------------------------------------------------------------------------------------------------------------------------------|--------|----|-----|----|----|
| P16406 | Glutamyl aminopeptidase (EC 3.4.11.7) (EAP) (Aminopeptidase A) (APA) (BP-1/6C3 antigen) - Mus musculus (Mouse)                                                                                      | 108401 | 98 | 90  | 48 | 46 |
| P00342 | L-lactate dehydrogenase C chain (EC 1.1.1.27) (LDH-C) (LDH testis subunit) (LDH-X) - Mus musculus (Mouse)                                                                                           | 36231  | 97 | 122 | 15 | 12 |
| O70435 | Proteasome subunit alpha type 3 (EC 3.4.25.1) (Proteasome component C8) (Macropain subunit C8) (Multicatalytic endopeptidase complex subunit C8) (Proteasome subunit K) - Mus musculus (Mouse)      | 28615  | 95 | 76  | 14 | 9  |
| P53026 | 60S ribosomal protein L10a (CSA-19) (Protein NEDD6) (Neural precursor cell expressed developmentally down-regulated protein 6) - Mus musculus (Mouse)                                               | 25072  | 95 | 61  | 19 | 8  |
| P30681 | High mobility group protein B2 (High mobility group protein 2) (HMG-2) - Mus musculus (Mouse)                                                                                                       | 24318  | 94 | 222 | 24 | 24 |
| P27546 | Microtubule-associated protein 4 (MAP 4) - Mus musculus (Mouse)                                                                                                                                     | 117899 | 94 | 41  | 33 | 36 |
| P99026 | Proteasome subunit beta type 4 precursor (EC 3.4.25.1) (Proteasome beta chain) (Macropain beta chain) (Multicatalytic endopeptidase complex beta chain) (Proteasome chain 3) - Mus musculus (Mouse) | 29211  | 93 | 289 | 11 | 16 |
| Q9JHR7 | Insulin-degrading enzyme (EC 3.4.24.56) (Insulysin) (Insulinase) (Insulin protease) - Mus musculus (Mouse)                                                                                          | 118438 | 93 | 0   | 12 | 0  |
| P63028 | Translationally-controlled tumor protein (TCTP) (p23) (21 kDa polypeptide) (p21) - Mus musculus (Mouse)                                                                                             | 19564  | 92 | 216 | 4  | 8  |
| Q61937 | Nucleophosmin (NPM) (Nucleolar phosphoprotein B23) (Numatrin) (Nucleolar protein NO38) - Mus musculus (Mouse)                                                                                       | 32711  | 92 | 66  | 11 | 15 |
| P14115 | 60S ribosomal protein L27a (L29) - Mus musculus (Mouse)                                                                                                                                             | 16693  | 92 | 32  | 14 | 5  |

|        |                                                                                                                                                             |        |    |     |    |    |
|--------|-------------------------------------------------------------------------------------------------------------------------------------------------------------|--------|----|-----|----|----|
| Q8K183 | Pyridoxal kinase (EC 2.7.1.35) (Pyridoxine kinase) - Mus musculus (Mouse)                                                                                   | 35278  | 92 | 0   | 5  | 0  |
| P50247 | Adenosylhomocysteinase (EC 3.3.1.1) (S-adenosyl-L-homocysteine hydrolase) (AdoHcyase) (Liver copper-binding protein) (CUBP) - Mus musculus (Mouse)          | 48170  | 90 | 106 | 10 | 15 |
| Q61656 | Probable ATP-dependent RNA helicase DDX5 (EC 3.6.1.-) (DEAD box protein 5) (RNA helicase p68) (DEAD box RNA helicase DEAD1) (mDEAD1) - Mus musculus (Mouse) | 69790  | 90 | 43  | 11 | 8  |
| Q501J6 | Probable ATP-dependent RNA helicase DDX17 (EC 3.6.1.-) (DEAD box protein 17) - Mus musculus (Mouse)                                                         | 72981  | 90 | 43  | 7  | 11 |
| P97461 | 40S ribosomal protein S5 - Mus musculus (Mouse)                                                                                                             | 23046  | 89 | 33  | 32 | 18 |
| Q9DBR7 | Protein phosphatase 1 regulatory subunit 12A (Myosin phosphatase-targeting subunit 1) (Myosin phosphatase target subunit 1) - Mus musculus (Mouse)          | 112198 | 88 | 67  | 18 | 19 |
| Q6P3Y5 | Suppressor of hairy wing homolog 3 - Mus musculus (Mouse)                                                                                                   | 84861  | 87 | 142 | 43 | 32 |
| Q61598 | Rab GDP dissociation inhibitor beta (Rab GDI beta) (Guanosine diphosphate dissociation inhibitor 2) (GDI-2) (GDI-3) - Mus musculus (Mouse)                  | 51018  | 87 | 0   | 8  | 0  |
| P04104 | Keratin, type II cytoskeletal 1 (Cytokeratin-1) (CK-1) (Keratin-1) (K1) (67 kDa cyokeratin) - Mus musculus (Mouse)                                          | 65696  | 87 | 124 | 14 | 27 |
| Q9R1P1 | Proteasome subunit beta type 3 (EC 3.4.25.1) (Proteasome theta chain) (Proteasome chain 13) (Proteasome component C10-II) - Mus musculus (Mouse)            | 23235  | 87 | 135 | 7  | 7  |
| Q91X97 | Neurocalcin-delta - Mus musculus (Mouse)                                                                                                                    | 22345  | 85 | 82  | 8  | 9  |
| Q6PDI5 | Proteasome-associated protein ECM29 homolog (Ecm29) - Mus musculus (Mouse)                                                                                  | 205412 | 85 | 0   | 21 | 0  |

|        |                                                                                                                                                                                                           |        |    |     |     |     |
|--------|-----------------------------------------------------------------------------------------------------------------------------------------------------------------------------------------------------------|--------|----|-----|-----|-----|
| Q8BU30 | Isoleucyl-tRNA synthetase, cytoplasmic (EC 6.1.1.5) (Isoleucine--tRNA ligase) (IleRS) (IRS) - Mus musculus (Mouse)                                                                                        | 145533 | 85 | 46  | 30  | 37  |
| O09061 | Proteasome subunit beta type 1 precursor (EC 3.4.25.1) (Proteasome component C5) (Macropain subunit C5) (Multicatalytic endopeptidase complex subunit C5) (Proteasome gamma chain) - Mus musculus (Mouse) | 26583  | 84 | 94  | 11  | 11  |
| Q9CZY3 | Ubiquitin-conjugating enzyme E2 variant 1 (UEV-1) (CROC-1) - Mus musculus (Mouse)                                                                                                                         | 16458  | 83 | 163 | 166 | 201 |
| Q9D2M8 | Ubiquitin-conjugating enzyme E2 variant 2 (Ubc-like protein MMS2) - Mus musculus (Mouse)                                                                                                                  | 16413  | 83 | 0   | 165 | 0   |
| P62821 | Ras-related protein Rab-1A (YPT1-related protein) - Mus musculus (Mouse)                                                                                                                                  | 22891  | 82 | 0   | 5   | 0   |
| P26645 | Myristoylated alanine-rich C-kinase substrate (MARCKS) - Mus musculus (Mouse)                                                                                                                             | 29701  | 82 | 0   | 2   | 0   |
| Q80YX1 | Tenascin precursor (TN) (Tenascin-C) (TN-C) (Hexabrachion) - Mus musculus (Mouse)                                                                                                                         | 237304 | 80 | 200 | 22  | 45  |
| P50518 | Vacuolar ATP synthase subunit E (EC 3.6.3.14) (V-ATPase E subunit) (Vacuolar proton pump E subunit) (V-ATPase 31 kDa subunit) (P31) - Mus musculus (Mouse)                                                | 26685  | 80 | 0   | 15  | 0   |
| Q9Z1R2 | Large proline-rich protein BAT3 (HLA-B-associated transcript 3) - Mus musculus (Mouse)                                                                                                                    | 121475 | 80 | 49  | 15  | 26  |
| O08810 | 116 kDa U5 small nuclear ribonucleoprotein component (U5 snRNP-specific protein, 116 kDa) (U5-116 kDa) (Elongation factor Tu GTP-binding domain protein 2) - Mus musculus (Mouse)                         | 110261 | 80 | 68  | 21  | 25  |
| Q8CIQ7 | Dedicator of cytokinesis protein 3 (Modifier of cell adhesion) (Presenilin-binding protein) (PBP) - Mus musculus (Mouse)                                                                                  | 234756 | 80 | 56  | 33  | 26  |

|        |                                                                                                                                                                                                                  |        |    |     |     |     |
|--------|------------------------------------------------------------------------------------------------------------------------------------------------------------------------------------------------------------------|--------|----|-----|-----|-----|
| P16045 | Galectin-1 (Lectin galactoside-binding soluble 1) (Beta-galactoside-binding lectin L-14-I) (Lactose-binding lectin 1) (S-Lac lectin 1) (Galaptin) (14 kDa lectin) - Mus musculus (Mouse)                         | 15198  | 79 | 85  | 6   | 9   |
| Q61206 | Platelet-activating factor acetylhydrolase IB subunit beta (EC 3.1.1.47) (PAF acetylhydrolase 30 kDa subunit) (PAF-AH 30 kDa subunit) (PAF-AH subunit beta) (PAFAH subunit beta) - Mus musculus (Mouse)          | 25647  | 79 | 98  | 7   | 3   |
| Q8BT18 | Serine/arginine repetitive matrix protein 2 - Mus musculus (Mouse)                                                                                                                                               | 295356 | 78 | 70  | 92  | 86  |
| Q91ZU6 | Bullous pemphigoid antigen 1, isoforms 1/2/3/4 (BPA) (Hemidesmosomal plaque protein) (Dystonia musculorum protein) (Dystonin) - Mus musculus (Mouse)                                                             | 838425 | 78 | 38  | 126 | 100 |
| P43277 | Histone H1.3 (H1 VAR.4) (H1d) - Mus musculus (Mouse)                                                                                                                                                             | 22086  | 78 | 99  | 18  | 16  |
| Q91Z67 | SLIT-ROBO Rho GTPase-activating protein 2 (srGAP2) (Formin-binding protein 2) (Formin-binding protein 27) (FBP-27) - Mus musculus (Mouse)                                                                        | 121920 | 77 | 48  | 11  | 8   |
| Q8VI56 | Low-density lipoprotein receptor-related protein 4 precursor (LDLR dan) - Mus musculus (Mouse)                                                                                                                   | 217151 | 77 | 30  | 19  | 20  |
| P15864 | Histone H1.2 (H1 VAR.1) (H1c) - Mus musculus (Mouse)                                                                                                                                                             | 21254  | 77 | 222 | 12  | 29  |
| P28271 | Iron-responsive element-binding protein 1 (IRE-BP 1) (Iron regulatory protein 1) (IRP1) (Ferritin repressor protein) (Aconitate hydratase) (EC 4.2.1.3) (Citrate hydro-lyase) (Aconitase) - Mus musculus (Mouse) | 98744  | 77 | 122 | 147 | 184 |
| P62301 | 40S ribosomal protein S13 - Mus musculus (Mouse)                                                                                                                                                                 | 17212  | 77 | 100 | 23  | 14  |
| P47915 | 60S ribosomal protein L29 - Mus musculus (Mouse)                                                                                                                                                                 | 17633  | 75 | 68  | 9   | 2   |

|        |                                                                                                                                                                                   |        |    |     |    |    |
|--------|-----------------------------------------------------------------------------------------------------------------------------------------------------------------------------------|--------|----|-----|----|----|
| Q88705 | Potassium/sodium hyperpolarization-activated cyclic nucleotide-gated channel 3 (Hyperpolarization-activated cation channel 3) (HAC-3) - Mus musculus (Mouse)                      | 87042  | 75 | 67  | 8  | 15 |
| Q64467 | Glyceraldehyde-3-phosphate dehydrogenase, testis-specific (EC 1.2.1.12) (Spermatogenic cell-specific glyceraldehyde 3-phosphate dehydrogenase 2) (GAPDH-2) - Mus musculus (Mouse) | 48367  | 75 | 781 | 26 | 29 |
| P62751 | 60S ribosomal protein L23a - Mus musculus (Mouse)                                                                                                                                 | 17684  | 75 | 49  | 16 | 12 |
| P25206 | DNA replication licensing factor MCM3 (DNA polymerase alpha holoenzyme-associated protein P1) (P1-MCM3) - Mus musculus (Mouse)                                                    | 92230  | 74 | 185 | 15 | 15 |
| Q920R0 | Alsin (Amyotrophic lateral sclerosis protein 2 homolog) - Mus musculus (Mouse)                                                                                                    | 184207 | 74 | 88  | 72 | 75 |
| P63042 | Stathmin-4 (Stathmin-like protein B3) (RB3) - Mus musculus (Mouse)                                                                                                                | 22301  | 74 | 53  | 8  | 5  |
| P55821 | Stathmin-2 (SCG10 protein) (Superior cervical ganglion-10 protein) - Mus musculus (Mouse)                                                                                         | 20929  | 74 | 73  | 6  | 7  |
| P07310 | Creatine kinase M-type (EC 2.7.3.2) (Creatine kinase M chain) (M-CK) - Mus musculus (Mouse)                                                                                       | 43246  | 73 | 107 | 31 | 28 |
| Q8JZK9 | Hydroxymethylglutaryl-CoA synthase, cytoplasmic (EC 2.3.3.10) (HMG-CoA synthase) (3-hydroxy-3-methylglutaryl coenzyme A synthase) - Mus musculus (Mouse)                          | 58160  | 72 | 49  | 15 | 4  |
| Q9CXW4 | 60S ribosomal protein L11 - Mus musculus (Mouse)                                                                                                                                  | 20468  | 72 | 79  | 11 | 7  |
| P11440 | Cell division control protein 2 homolog (EC 2.7.11.22) (EC 2.7.11.23) (p34 protein kinase) (Cyclin-dependent kinase 1) (CDK1) - Mus musculus (Mouse)                              | 34142  | 72 | 0   | 6  | 0  |
| Q11011 | Puromycin-sensitive aminopeptidase (EC 3.4.11.-) (PSA) - Mus musculus (Mouse)                                                                                                     | 103970 | 71 | 141 | 30 | 26 |

|        |                                                                                                                                                |        |    |     |     |     |
|--------|------------------------------------------------------------------------------------------------------------------------------------------------|--------|----|-----|-----|-----|
| Q9EST5 | Acidic leucine-rich nuclear phosphoprotein 32 family member B (Proliferation-related acidic leucine-rich protein PAL31) - Mus musculus (Mouse) | 31231  | 71 | 89  | 8   | 4   |
| Q8BGY2 | Eukaryotic translation initiation factor 5A-2 (eIF-5A-2) (eIF-5A2) (Eukaryotic initiation factor 5A isoform 2) - Mus musculus (Mouse)          | 17124  | 70 | 331 | 6   | 14  |
| Q9D1H6 | UPF0240 protein C6orf66 homolog - Mus musculus (Mouse)                                                                                         | 20070  | 70 | 38  | 6   | 9   |
| Q811J3 | Iron-responsive element-binding protein 2 (IRE-BP 2) (Iron regulatory protein 2) (IRP2) - Mus musculus (Mouse)                                 | 105896 | 69 | 119 | 142 | 176 |
| P60867 | 40S ribosomal protein S20 - Mus musculus (Mouse)                                                                                               | 13478  | 69 | 37  | 4   | 2   |
| Q9EQH3 | Vacuolar protein sorting-associated protein 35 (Vesicle protein sorting 35) (Maternal-embryonic 3) - Mus musculus (Mouse)                      | 92453  | 68 | 28  | 18  | 7   |
| P16546 | Spectrin alpha chain, brain (Spectrin, non-erythroid alpha chain) (Alpha-II spectrin) (Fodrin alpha chain) - Mus musculus (Mouse)              | 285221 | 68 | 86  | 66  | 69  |
| Q91Z69 | SLIT-ROBO Rho GTPase-activating protein 1 (srGAP1) (Rho GTPase-activating protein 13) - Mus musculus (Mouse)                                   | 122266 | 68 | 0   | 9   | 0   |
| P55200 | Zinc finger protein HRX (ALL-1) - Mus musculus (Mouse)                                                                                         | 434172 | 67 | 26  | 39  | 44  |
| P54276 | DNA mismatch repair protein MSH6 (MutS-alpha 160 kDa subunit) (G/T mismatch-binding protein) (GTBP) (GTMBP) (p160) - Mus musculus (Mouse)      | 152805 | 67 | 0   | 17  | 0   |
| Q9D8W5 | 26S proteasome non-ATPase regulatory subunit 12 (26S proteasome regulatory subunit p55) - Mus musculus (Mouse)                                 | 53243  | 67 | 78  | 7   | 11  |
| P03966 | N-myc proto-oncogene protein - Mus musculus (Mouse)                                                                                            | 49998  | 65 | 46  | 18  | 17  |
| Q8CAY6 | Acetyl-CoA acetyltransferase, cytosolic (EC 2.3.1.9) (Cytosolic acetoacetyl-CoA thiolase) - Mus musculus (Mouse)                               | 41727  | 65 | 18  | 9   | 6   |



|        |                                                                                                                                                                                                                                    |        |    |     |    |    |
|--------|------------------------------------------------------------------------------------------------------------------------------------------------------------------------------------------------------------------------------------|--------|----|-----|----|----|
| P97820 | Mitogen-activated protein kinase kinase kinase 4 (EC 2.7.11.1) (MAPK/ERK kinase kinase 4) (MEK kinase kinase 4) (MEKKK 4) (HPK/GCK-like kinase HGK) (Nck-interacting kinase) - Mus musculus (Mouse)                                | 141257 | 65 | 54  | 15 | 17 |
| O08788 | Dynactin-1 (150 kDa dynein-associated polypeptide) (DP-150) (DAP-150) (p150-glued) - Mus musculus (Mouse)                                                                                                                          | 142320 | 64 | 70  | 19 | 19 |
| O55236 | mRNA capping enzyme (HCE) (MCE1) [Includes: Polynucleotide 5~-triphosphatase (EC 3.1.3.33) (mRNA 5~-triphosphatase) (TPase); mRNA guanylyltransferase (EC 2.7.7.50) (GTP--RNA guanylyltransferase) (GTase)] - Mus musculus (Mouse) | 69495  | 64 | 33  | 33 | 15 |
| Q8R5F3 | Uncharacterized protein C6orf130 homolog - Mus musculus (Mouse)                                                                                                                                                                    | 17367  | 64 | 29  | 31 | 23 |
| O88811 | Signal transducing adapter molecule 2 (STAM-2) (Hrs-binding protein) - Mus musculus (Mouse)                                                                                                                                        | 57818  | 63 | 18  | 24 | 12 |
| P03995 | Glial fibrillary acidic protein, astrocyte (GFAP) - Mus musculus (Mouse)                                                                                                                                                           | 49935  | 63 | 90  | 22 | 20 |
| Q80X90 | Filamin-B (FLN-B) (Beta-filamin) (Actin-binding-like protein) (ABP-280-like protein) - Mus musculus (Mouse)                                                                                                                        | 280031 | 63 | 279 | 32 | 41 |
| Q923A2 | Coiled-coil domain-containing protein 99 - Mus musculus (Mouse)                                                                                                                                                                    | 70820  | 63 | 0   | 15 | 0  |
| Q80X50 | Ubiquitin-associated protein 2-like - Mus musculus (Mouse)                                                                                                                                                                         | 116842 | 63 | 54  | 4  | 5  |
| Q9D289 | Trafficking protein particle complex subunit 6B - Mus musculus (Mouse)                                                                                                                                                             | 18152  | 62 | 69  | 9  | 9  |
| Q9Z1F9 | SUMO-activating enzyme subunit 2 (EC 6.3.2.-) (Ubiquitin-like 1-activating enzyme E1B) (Anthracycline-associated resistance ARX) - Mus musculus (Mouse)                                                                            | 71209  | 62 | 77  | 10 | 14 |

|        |                                                                                                                                                                |        |    |     |    |    |
|--------|----------------------------------------------------------------------------------------------------------------------------------------------------------------|--------|----|-----|----|----|
| Q9R0P5 | Destrin (Actin-depolymerizing factor) (ADF) (Sid 23) - Mus musculus (Mouse)                                                                                    | 18852  | 61 | 81  | 8  | 7  |
| P11679 | Keratin, type II cytoskeletal 8 (Cytokeratin-8) (CK-8) (Keratin-8) (K8) (Cytokeratin endo A) - Mus musculus (Mouse)                                            | 54531  | 61 | 175 | 13 | 29 |
| P12813 | Orphan nuclear receptor NR4A1 (Orphan nuclear receptor HMR) (Nuclear hormone receptor NUR/77) (N10 nuclear protein) - Mus musculus (Mouse)                     | 66009  | 61 | 31  | 7  | 10 |
| P80315 | T-complex protein 1 subunit delta (TCP-1-delta) (CCT-delta) (A45) - Mus musculus (Mouse)                                                                       | 58543  | 61 | 59  | 15 | 18 |
| Q5XJY5 | Coatmer subunit delta (Delta-coat protein) (Delta-COP) (Archain) - Mus musculus (Mouse)                                                                        | 57637  | 61 | 45  | 10 | 8  |
| P62991 | Ubiquitin - Mus musculus (Mouse)                                                                                                                               | 8560   | 61 | 54  | 11 | 8  |
| Q91VX2 | Ubiquitin-associated protein 2 (Protein lingerer homolog 1) (MLig-1) - Mus musculus (Mouse)                                                                    | 118293 | 60 | 41  | 10 | 9  |
| P47753 | F-actin capping protein subunit alpha-1 (CapZ alpha-1) - Mus musculus (Mouse)                                                                                  | 33090  | 60 | 33  | 7  | 9  |
| P47754 | F-actin capping protein subunit alpha-2 (CapZ alpha-2) - Mus musculus (Mouse)                                                                                  | 33118  | 60 | 33  | 5  | 6  |
| P35278 | Ras-related protein Rab-5C - Mus musculus (Mouse)                                                                                                              | 23626  | 60 | 79  | 4  | 12 |
| Q6URW6 | Myosin-14 (Myosin heavy chain 14) (Myosin heavy chain, nonmuscle IIc) (Nonmuscle myosin heavy chain IIc) (NMHC II-C) - Mus musculus (Mouse)                    | 229359 | 60 | 48  | 53 | 44 |
| P97822 | Acidic leucine-rich nuclear phosphoprotein 32 family member E (LANP-like protein) (LANP-L) (Cerebellar postnatal development protein 1) - Mus musculus (Mouse) | 29832  | 60 | 0   | 7  | 0  |
| P59999 | Actin-related protein 2/3 complex subunit 4 (ARP2/3 complex 20 kDa subunit) (p20-ARC) - Mus musculus (Mouse)                                                   | 19768  | 60 | 0   | 6  | 0  |

|        |                                                                                                                                                                     |        |    |     |    |    |
|--------|---------------------------------------------------------------------------------------------------------------------------------------------------------------------|--------|----|-----|----|----|
| P62748 | Hippocalcin-like protein 1 (Visinin-like protein 3) (VILIP-3) (Neural visinin-like protein 3) (NVL-3) (NVP-3) - Mus musculus (Mouse)                                | 22438  | 59 | 97  | 13 | 10 |
| Q9WUJ8 | Origin recognition complex subunit 6 - Mus musculus (Mouse)                                                                                                         | 29683  | 59 | 37  | 13 | 7  |
| P67984 | 60S ribosomal protein L22 (Heparin-binding protein HBp15) - Mus musculus (Mouse)                                                                                    | 14807  | 59 | 48  | 7  | 6  |
| Q9DCT8 | Cysteine-rich protein 2 (CRP2) (Heart LIM protein) - Mus musculus (Mouse)                                                                                           | 23510  | 58 | 17  | 2  | 1  |
| P08249 | Malate dehydrogenase, mitochondrial precursor (EC 1.1.1.37) - Mus musculus (Mouse)                                                                                  | 36030  | 58 | 31  | 13 | 5  |
| Q62084 | Protein phosphatase 1 regulatory subunit 14B (Phosphatase holoenzyme inhibitor 1) (PHI-1) (Phospholipase C beta 3 neighbouring gene protein) - Mus musculus (Mouse) | 16061  | 58 | 14  | 4  | 2  |
| P97427 | Dihydropyrimidinase-related protein 1 (DRP-1) (Collapsin response mediator protein 1) (CRMP-1) (ULIP3 protein) - Mus musculus (Mouse)                               | 62471  | 57 | 0   | 13 | 0  |
| Q9CXW3 | Calcyclin-binding protein (CacyBP) (Siah-interacting protein) - Mus musculus (Mouse)                                                                                | 26608  | 57 | 39  | 7  | 13 |
| P62830 | 60S ribosomal protein L23 - Mus musculus (Mouse)                                                                                                                    | 14970  | 57 | 89  | 15 | 5  |
| Q9QUR6 | Prolyl endopeptidase (EC 3.4.21.26) (Post-proline cleaving enzyme) (PE) - Mus musculus (Mouse)                                                                      | 81669  | 56 | 20  | 15 | 18 |
| Q62261 | Spectrin beta chain, brain 1 (Spectrin, non-erythroid beta chain 1) (Beta-II spectrin) (Fodrin beta chain) - Mus musculus (Mouse)                                   | 274908 | 56 | 54  | 48 | 48 |
| P60335 | Poly(rC)-binding protein 1 (Alpha CP1) (hnRNP-E1) - Mus musculus (Mouse)                                                                                            | 37987  | 56 | 350 | 9  | 13 |

|        |                                                                                                                                                                                                                                                           |        |    |     |    |    |
|--------|-----------------------------------------------------------------------------------------------------------------------------------------------------------------------------------------------------------------------------------------------------------|--------|----|-----|----|----|
| P62960 | Nuclease sensitive element-binding protein 1 (Y-box-binding protein 1) (Y-box transcription factor) (YB-1) (CCAAT-binding transcription factor I subunit A) (CBF-A) (Enhancer factor I subunit A) (EFI-A) (DNA-binding protein B) (DBPB) - Mus musculus ( | 35709  | 56 | 126 | 6  | 10 |
| Q9ERU9 | E3 SUMO-protein ligase RanBP2 (Ran-binding protein 2) - Mus musculus (Mouse)                                                                                                                                                                              | 344640 | 56 | 49  | 40 | 53 |
| P83741 | Serine/threonine-protein kinase WNK1 (EC 2.7.11.1) (Protein kinase with no lysine 1) (Protein kinase, lysine-deficient 1) - Mus musculus (Mouse)                                                                                                          | 251978 | 56 | 36  | 18 | 27 |
| Q99020 | Heterogeneous nuclear ribonucleoprotein A/B (hnRNP A/B) (CArG-binding factor-A) (CBF-A) - Mus musculus (Mouse)                                                                                                                                            | 30926  | 56 | 138 | 5  | 11 |
| O08709 | Peroxiredoxin-6 (EC 1.11.1.15) (Antioxidant protein 2) (1-Cys peroxiredoxin) (1-Cys PRX) (Acidic calcium-independent phospholipase A2) (EC 3.1.1.-) (aiPLA2) (Non-selenium glutathione peroxidase) (EC 1.11.1.7) (NSGPx) - Mus musculus (Mouse)           | 24969  | 56 | 29  | 5  | 3  |
| Q64674 | Spermidine synthase (EC 2.5.1.16) (Putrescine aminopropyltransferase) (SPDSY) - Mus musculus (Mouse)                                                                                                                                                      | 34543  | 55 | 29  | 4  | 7  |
| Q9D868 | Peptidyl-prolyl cis-trans isomerase H (EC 5.2.1.8) (PPIase H) (Rotamase H) - Mus musculus (Mouse)                                                                                                                                                         | 20735  | 55 | 31  | 7  | 6  |
| P24369 | Peptidyl-prolyl cis-trans isomerase B precursor (EC 5.2.1.8) (PPIase) (Rotamase) (Cyclophilin B) (S-cyclophilin) (SCYLP) (CYP-S1) - Mus musculus (Mouse)                                                                                                  | 22699  | 55 | 31  | 6  | 3  |
| P30412 | Peptidyl-prolyl cis-trans isomerase C (EC 5.2.1.8) (PPIase) (Rotamase) (Cyclophilin C) - Mus musculus (Mouse)                                                                                                                                             | 22894  | 55 | 0   | 5  | 0  |

|        |                                                                                                                                    |        |    |     |    |    |
|--------|------------------------------------------------------------------------------------------------------------------------------------|--------|----|-----|----|----|
| Q640P2 | Angiopoietin-related protein 1 precursor (Angiopoietin-like 1) - Mus musculus (Mouse)                                              | 56743  | 55 | 41  | 21 | 28 |
| Q61390 | T-complex protein 1 subunit zeta 2 (TCP-1-zeta-2) (CCT-zeta-2) (Cctz-2) - Mus musculus (Mouse)                                     | 58661  | 55 | 52  | 15 | 8  |
| Q64514 | Tripeptidyl-peptidase 2 (EC 3.4.14.10) (Tripeptidyl-peptidase II) (TPP-II) (Tripeptidyl aminopeptidase) - Mus musculus (Mouse)     | 141330 | 54 | 76  | 24 | 20 |
| P97310 | DNA replication licensing factor MCM2 (Minichromosome maintenance protein 2 homolog) (Nuclear protein BM28) - Mus musculus (Mouse) | 102698 | 54 | 168 | 30 | 15 |
| Q8BFY9 | Transportin-1 (Importin beta-2) (Karyopherin beta-2) - Mus musculus (Mouse)                                                        | 102729 | 54 | 43  | 10 | 12 |
| Q4VGL6 | Roquin (RING finger and C3H zinc finger protein 1) (Sanroque protein) - Mus musculus (Mouse)                                       | 126269 | 54 | 54  | 23 | 17 |
| Q8BHG1 | Nardilysin precursor (EC 3.4.24.61) (N-arginine dibasic convertase) (NRD convertase) (NRD-C) - Mus musculus (Mouse)                | 133720 | 53 | 54  | 13 | 21 |
| Q99LX0 | Protein DJ-1 - Mus musculus (Mouse)                                                                                                | 20236  | 53 | 178 | 9  | 9  |
| Q9JIC3 | DNA cross-link repair 1A protein - Mus musculus (Mouse)                                                                            | 115206 | 52 | 19  | 34 | 14 |
| Q7TSG2 | RNA polymerase II subunit A C-terminal domain phosphatase (EC 3.1.3.16) (TFIIF-associating CTD phosphatase) - Mus musculus (Mouse) | 105516 | 52 | 0   | 9  | 0  |
| Q9R194 | Cryptochrome-2 - Mus musculus (Mouse)                                                                                              | 67549  | 52 | 42  | 21 | 18 |
| P97784 | Cryptochrome-1 - Mus musculus (Mouse)                                                                                              | 68813  | 52 | 42  | 21 | 18 |
| Q8BMJ2 | Leucyl-tRNA synthetase, cytoplasmic (EC 6.1.1.4) (Leucine--tRNA ligase) (LeuRS) - Mus musculus (Mouse)                             | 135360 | 52 | 45  | 47 | 33 |
| P62492 | Ras-related protein Rab-11A (Rab-11) - Mus musculus (Mouse)                                                                        | 24492  | 52 | 0   | 8  | 0  |

|        |                                                                                                                                                                                                                       |        |    |    |    |    |
|--------|-----------------------------------------------------------------------------------------------------------------------------------------------------------------------------------------------------------------------|--------|----|----|----|----|
| P08551 | Neurofilament triplet L protein (68 kDa neurofilament protein) (Neurofilament light polypeptide) (NF-L) - Mus musculus (Mouse)                                                                                        | 61528  | 51 | 36 | 17 | 12 |
| P56198 | Cell death activator CIDE-3 (Cell death-inducing DFFA-like effector protein C) (Fat-specific protein FSP27) - Mus musculus (Mouse)                                                                                    | 27502  | 51 | 39 | 8  | 14 |
| P63323 | 40S ribosomal protein S12 - Mus musculus (Mouse)                                                                                                                                                                      | 14858  | 50 | 0  | 8  | 0  |
| O54887 | Testis-specific serine kinase substrate (Testis-specific kinase substrate) (STK22 substrate 1) - Mus musculus (Mouse)                                                                                                 | 64221  | 50 | 21 | 16 | 12 |
| P20357 | Microtubule-associated protein 2 (MAP 2) - Mus musculus (Mouse)                                                                                                                                                       | 199259 | 50 | 22 | 30 | 25 |
| Q6P8J7 | Creatine kinase, sarcomeric mitochondrial precursor (EC 2.7.3.2) (S-MtCK) - Mus musculus (Mouse)                                                                                                                      | 47899  | 50 | 66 | 26 | 26 |
| P41105 | 60S ribosomal protein L28 - Mus musculus (Mouse)                                                                                                                                                                      | 15781  | 49 | 41 | 19 | 11 |
| Q62203 | Splicing factor 3A subunit 2 (Spliceosome-associated protein 62) (SAP 62) (SF3a66) - Mus musculus (Mouse)                                                                                                             | 49994  | 49 | 0  | 5  | 0  |
| P80313 | T-complex protein 1 subunit eta (TCP-1-eta) (CCT-eta) - Mus musculus (Mouse)                                                                                                                                          | 60127  | 49 | 50 | 11 | 13 |
| P49025 | Citron Rho-interacting kinase (EC 2.7.11.1) (CRIK) (Rho-interacting, serine/threonine-protein kinase 21) - Mus musculus (Mouse)                                                                                       | 237294 | 49 | 67 | 67 | 81 |
| P61089 | Ubiquitin-conjugating enzyme E2 N (EC 6.3.2.19) (Ubiquitin-protein ligase N) (Ubiquitin carrier protein N) (Ubc13) (Bendless-like ubiquitin-conjugating enzyme) - Mus musculus (Mouse)                                | 17184  | 49 | 31 | 7  | 2  |
| Q8K2Z4 | Condensin complex subunit 1 (Non-SMC condensin I complex subunit D2) (Chromosome condensation-related SMC-associated protein 1) (Chromosome-associated protein D2) (mCAP-D2) (XCAP-D2 homolog) - Mus musculus (Mouse) | 156821 | 49 | 0  | 9  | 0  |

|        |                                                                                                                                                                                                                                                      |        |    |     |    |    |
|--------|------------------------------------------------------------------------------------------------------------------------------------------------------------------------------------------------------------------------------------------------------|--------|----|-----|----|----|
| P34022 | Ran-specific GTPase-activating protein (Ran-binding protein 1) (RANBP1) (HpaII tiny fragments locus 9a protein) - Mus musculus (Mouse)                                                                                                               | 23753  | 49 | 24  | 5  | 10 |
| Q6XUX1 | Receptor-interacting serine/threonine-protein kinase 5 (EC 2.7.11.1) (Dusty protein kinase) (Dusty PK) - Mus musculus (Mouse)                                                                                                                        | 106203 | 49 | 0   | 15 | 0  |
| Q80T14 | Extracellular matrix protein FRAS1 precursor - Mus musculus (Mouse)                                                                                                                                                                                  | 453595 | 48 | 109 | 24 | 19 |
| Q8CI51 | PDZ and LIM domain protein 5 (Enigma homolog) (Enigma-like PDZ and LIM domains protein) - Mus musculus (Mouse)                                                                                                                                       | 64544  | 48 | 0   | 18 | 0  |
| Q9CQ65 | S-methyl-5-thioadenosine phosphorylase (EC 2.4.2.28) (5-methylthioadenosine phosphorylase) (MTA phosphorylase) (MTAPase) - Mus musculus (Mouse)                                                                                                      | 31612  | 48 | 36  | 7  | 5  |
| O55029 | Coatamer subunit beta~ (Beta~coat protein) (Beta~-COP) (p102) - Mus musculus (Mouse)                                                                                                                                                                 | 103240 | 48 | 31  | 4  | 8  |
| P70168 | Importin beta-1 subunit (Karyopherin beta-1 subunit) (Nuclear factor P97) (Pore targeting complex 97 kDa subunit) (PTAC97) (SCG) - Mus musculus (Mouse)                                                                                              | 98345  | 48 | 17  | 13 | 17 |
| Q9WUU9 | 80 kDa MCM3-associated protein (GANP protein) - Mus musculus (Mouse)                                                                                                                                                                                 | 219228 | 48 | 32  | 17 | 19 |
| Q8R0W0 | Epiplakin - Mus musculus (Mouse)                                                                                                                                                                                                                     | 726989 | 48 | 25  | 49 | 50 |
| Q921Q7 | Ras and Rab interactor 1 (Ras interaction/interference protein 1) - Mus musculus (Mouse)                                                                                                                                                             | 83703  | 48 | 0   | 15 | 0  |
| P63154 | Crooked neck-like protein 1 (Crooked neck homolog) - Mus musculus (Mouse)                                                                                                                                                                            | 83649  | 48 | 0   | 10 | 0  |
| Q9EQZ6 | Rap guanine nucleotide exchange factor 4 (cAMP-regulated guanine nucleotide exchange factor II) (cAMP-GEFII) (Exchange factor directly activated by cAMP 2) (Epac 2) (cAMP-dependent Rap1 guanine nucleotide exchange factor) - Mus musculus (Mouse) | 116444 | 47 | 23  | 20 | 12 |

|        |                                                                                                                                                      |        |    |     |    |    |
|--------|------------------------------------------------------------------------------------------------------------------------------------------------------|--------|----|-----|----|----|
| Q6NZJ6 | Eukaryotic translation initiation factor 4 gamma 1 (eIF-4-gamma 1) (eIF-4G1) (eIF-4G 1) - Mus musculus (Mouse)                                       | 176823 | 47 | 113 | 30 | 18 |
| Q8CDK3 | IQ and ubiquitin-like domain-containing protein FLJ35834 homolog - Mus musculus (Mouse)                                                              | 92756  | 47 | 30  | 10 | 4  |
| Q91XQ0 | Ciliary dynein heavy chain 8 (Axonemal beta dynein heavy chain 8) - Mus musculus (Mouse)                                                             | 544766 | 47 | 51  | 77 | 64 |
| Q8VHE6 | Ciliary dynein heavy chain 5 (Axonemal beta dynein heavy chain 5) (Mdnah5) - Mus musculus (Mouse)                                                    | 531101 | 47 | 44  | 83 | 72 |
| Q8BJY1 | 26S proteasome non-ATPase regulatory subunit 5 (26S proteasome subunit S5B) (26S protease subunit S5 basic) - Mus musculus (Mouse)                   | 56336  | 47 | 41  | 26 | 13 |
| Q8BGR5 | Protein FAM53B - Mus musculus (Mouse)                                                                                                                | 47221  | 47 | 41  | 19 | 12 |
| Q9CR16 | 40 kDa peptidyl-prolyl cis-trans isomerase (EC 5.2.1.8) (PPIase) (Rotamase) (Cyclophilin-40) (CYP-40) - Mus musculus (Mouse)                         | 41116  | 47 | 0   | 9  | 0  |
| Q07133 | Histone H1t (Testicular H1 histone) - Mus musculus (Mouse)                                                                                           | 21527  | 46 | 72  | 54 | 69 |
| P97412 | Lysosomal-trafficking regulator (Beige protein) (CHS1 homolog) - Mus musculus (Mouse)                                                                | 430549 | 46 | 27  | 33 | 31 |
| Q61699 | Heat-shock protein 105 kDa (Heat shock-related 100 kDa protein E71) (HSP-E71) (Heat shock 110 kDa protein) (42 degrees C-HSP) - Mus musculus (Mouse) | 97316  | 46 | 48  | 18 | 13 |
| Q9D2Y5 | Sorting nexin-20 - Mus musculus (Mouse)                                                                                                              | 36432  | 45 | 0   | 8  | 0  |
| P15331 | Peripherin - Mus musculus (Mouse)                                                                                                                    | 54349  | 45 | 181 | 10 | 28 |
| Q9JKV1 | Adhesion-regulating molecule 1 precursor (110 kDa cell membrane glycoprotein) (Gp110) (ARM-1) - Mus musculus (Mouse)                                 | 42342  | 45 | 26  | 7  | 3  |
| Q8CDN8 | Coiled-coil domain-containing protein 38 - Mus musculus (Mouse)                                                                                      | 65908  | 45 | 95  | 15 | 11 |



|        |                                                                                                                                                    |        |    |     |     |     |
|--------|----------------------------------------------------------------------------------------------------------------------------------------------------|--------|----|-----|-----|-----|
| Q35071 | Kinesin-like protein KIF1C - Mus musculus (Mouse)                                                                                                  | 123213 | 45 | 104 | 47  | 23  |
| Q60575 | Kinesin-like protein KIF1B - Mus musculus (Mouse)                                                                                                  | 205322 | 45 | 95  | 30  | 36  |
| P33173 | Kinesin-like protein KIF1A (Axonal transporter of synaptic vesicles) - Mus musculus (Mouse)                                                        | 193144 | 45 | 108 | 25  | 22  |
| Q9JKP5 | Muscleblind-like protein (Triplet-expansion RNA-binding protein) - Mus musculus (Mouse)                                                            | 37807  | 45 | 63  | 244 | 281 |
| P70338 | Zinc finger protein Gfi-1 (Growth factor independence 1) - Mus musculus (Mouse)                                                                    | 46986  | 45 | 39  | 17  | 23  |
| Q8K386 | Ras-related protein Rab-15 - Mus musculus (Mouse)                                                                                                  | 24588  | 44 | 74  | 4   | 6   |
| Q8CIB9 | N-acetyltransferase ESCO2 (EC 2.3.1.-) (Establishment of cohesion 1 homolog 2) (ECO1 homolog 2) - Mus musculus (Mouse)                             | 68314  | 44 | 0   | 11  | 0   |
| P62267 | 40S ribosomal protein S23 - Mus musculus (Mouse)                                                                                                   | 15969  | 44 | 23  | 12  | 4   |
| Q64237 | Dopamine beta-hydroxylase precursor (EC 1.14.17.1) (Dopamine beta-monooxygenase) - Mus musculus (Mouse)                                            | 71054  | 44 | 23  | 7   | 5   |
| Q8BJU0 | Small glutamine-rich tetratricopeptide repeat-containing protein A - Mus musculus (Mouse)                                                          | 34529  | 43 | 0   | 1   | 0   |
| P62315 | Small nuclear ribonucleoprotein Sm D1 (snRNP core protein D1) (Sm-D1) (Sm-D autoantigen) - Mus musculus (Mouse)                                    | 13273  | 43 | 0   | 3   | 0   |
| Q9Z277 | Bromodomain adjacent to zinc finger domain protein 1B (Williams-Beuren syndrome chromosome region 9 protein homolog) (WBR9) - Mus musculus (Mouse) | 172392 | 43 | 17  | 26  | 34  |
| Q64105 | Sepiapterin reductase (EC 1.1.1.153) (SPR) - Mus musculus (Mouse)                                                                                  | 28208  | 43 | 27  | 9   | 5   |
| Q6Y4S4 | Metastasis-suppressor KiSS-1 precursor (Kisspeptin-1) [Contains: Metastin (Kisspeptin-52); Kisspeptin-10 (Metastin45-54)] - Mus musculus (Mouse)   | 14279  | 42 | 31  | 6   | 1   |

|        |                                                                                                                                                                                                                                                            |        |    |     |    |     |
|--------|------------------------------------------------------------------------------------------------------------------------------------------------------------------------------------------------------------------------------------------------------------|--------|----|-----|----|-----|
| Q69Z69 | N-acetyltransferase ESCO1 (EC 2.3.1.-) (Establishment of cohesion 1 homolog 1) (ECO1 homolog 1) - Mus musculus (Mouse)                                                                                                                                     | 96365  | 42 | 173 | 56 | 124 |
| P70398 | Probable ubiquitin carboxyl-terminal hydrolase FAF-X (EC 3.1.2.15) (Ubiquitin thioesterase FAF-X) (Ubiquitin-specific-processing protease FAF-X) (Deubiquitinating enzyme FAF-X) (Fat facets protein-related, X-linked) (Ubiquitin-specific protease 9, X) | 293895 | 42 | 28  | 57 | 61  |
| Q9D415 | Disks large-associated protein 1 (DAP-1) (Guanylate kinase-associated protein) (SAP90/PSD-95-associated protein 1) (SAPAP1) (PSD-95/SAP90-binding protein 1) - Mus musculus (Mouse)                                                                        | 111559 | 42 | 0   | 21 | 0   |
| Q3TY86 | Apoptosis-inducing factor-like protein (EC 1.-.-.-) - Mus musculus (Mouse)                                                                                                                                                                                 | 67377  | 42 | 26  | 28 | 30  |
| P12815 | Programmed cell death protein 6 (Probable calcium-binding protein ALG-2) (PMP41) (ALG-257) - Mus musculus (Mouse)                                                                                                                                          | 21911  | 42 | 19  | 1  | 2   |
| Q8R1S0 | Ubiquinone biosynthesis monooxygenase COQ6 (EC 1.14.13.-) - Mus musculus (Mouse)                                                                                                                                                                           | 50959  | 42 | 92  | 10 | 17  |
| Q9WUM4 | Coronin-1C (Coronin-3) - Mus musculus (Mouse)                                                                                                                                                                                                              | 53771  | 42 | 28  | 18 | 21  |
| Q9ERK4 | Exportin-2 (Exp2) (Importin-alpha re-exporter) (Chromosome segregation 1-like protein) - Mus musculus (Mouse)                                                                                                                                              | 111183 | 42 | 153 | 26 | 44  |
| Q99LG2 | Transportin-2 (Karyopherin beta-2b) - Mus musculus (Mouse)                                                                                                                                                                                                 | 101930 | 42 | 32  | 7  | 5   |
| P21180 | Complement C2 precursor (EC 3.4.21.43) (C3/C5 convertase) [Contains: Complement C2b fragment; Complement C2a fragment] - Mus musculus (Mouse)                                                                                                              | 85927  | 42 | 19  | 17 | 3   |
| Q91VW5 | Golgin subfamily A member 4 (tGolgin-1) - Mus musculus (Mouse)                                                                                                                                                                                             | 258832 | 41 | 60  | 46 | 39  |

|        |                                                                                                                                                                                                                                   |        |    |    |    |    |
|--------|-----------------------------------------------------------------------------------------------------------------------------------------------------------------------------------------------------------------------------------|--------|----|----|----|----|
| Q80Z38 | SH3 and multiple ankyrin repeat domains protein 2 (Shank2) (Cortactin-binding protein 1) (CortBP1) - Mus musculus (Mouse)                                                                                                         | 159394 | 41 | 57 | 21 | 26 |
| O88291 | Zinc finger protein 326 (Zinc finger protein-associated with nuclear matrix of 75 kDa) - Mus musculus (Mouse)                                                                                                                     | 65641  | 41 | 55 | 5  | 3  |
| Q9WV89 | Syntaxin-binding protein 4 (Syntaxin 4-interacting protein) (STX4-interacting protein) (Synip) - Mus musculus (Mouse)                                                                                                             | 62335  | 41 | 19 | 11 | 6  |
| Q9CZW4 | Long-chain-fatty-acid--CoA ligase 3 (EC 6.2.1.3) (Long-chain acyl-CoA synthetase 3) (LACS 3) - Mus musculus (Mouse)                                                                                                               | 81481  | 41 | 37 | 13 | 10 |
| Q3UBX0 | Transmembrane protein 109 precursor (Mitsugumin-23) (Mg23) - Mus musculus (Mouse)                                                                                                                                                 | 26346  | 41 | 22 | 9  | 11 |
| Q8R4K8 | Pappalysin-1 precursor (EC 3.4.24.79) (Pregnancy-associated plasma protein-A) (PAPP-A) (Insulin-like growth factor-dependent IGF-binding protein 4 protease) (IGF-dependent IGFBP-4 protease) (IGFBP-4ase) - Mus musculus (Mouse) | 185990 | 41 | 43 | 25 | 15 |
| P30416 | FK506-binding protein 4 (EC 5.2.1.8) (Peptidyl-prolyl cis-trans isomerase) (PPIase) (Rotamase) (p59 protein) (HSP-binding immunophilin) (HBI) (FKBP52 protein) (52 kDa FK506-binding protein) (FKBP59) - Mus musculus (Mouse)     | 51939  | 40 | 62 | 8  | 8  |
| P49718 | DNA replication licensing factor MCM5 (CDC46 homolog) (P1-CDC46) - Mus musculus (Mouse)                                                                                                                                           | 83145  | 40 | 20 | 18 | 21 |
| Q8VDR7 | dTDP-D-glucose 4,6-dehydratase (EC 4.2.1.46) - Mus musculus (Mouse)                                                                                                                                                               | 40857  | 40 | 0  | 5  | 0  |
| Q9D6I3 | Profilin-4 (Profilin IV) - Mus musculus (Mouse)                                                                                                                                                                                   | 14578  | 39 | 0  | 7  | 0  |

|        |                                                                                                                                                                                                                                                            |        |    |     |    |    |
|--------|------------------------------------------------------------------------------------------------------------------------------------------------------------------------------------------------------------------------------------------------------------|--------|----|-----|----|----|
| Q8BYH8 | Chromodomain-helicase-DNA-binding protein 9 (EC 3.6.1.-) (ATP-dependent helicase CHD9) (CHD-9) (Peroxisomal proliferator-activated receptor A-interacting complex 320 kDa protein) (PPAR-alpha-interacting complex protein 320 kDa) - Mus musculus (Mouse) | 325826 | 39 | 27  | 49 | 27 |
| P84099 | 60S ribosomal protein L19 - Mus musculus (Mouse)                                                                                                                                                                                                           | 23565  | 39 | 47  | 13 | 8  |
| Q8R1A4 | Dedicator of cytokinesis protein 7 - Mus musculus (Mouse)                                                                                                                                                                                                  | 243167 | 39 | 0   | 17 | 0  |
| O70251 | Elongation factor 1-beta (EF-1-beta) - Mus musculus (Mouse)                                                                                                                                                                                                | 24849  | 39 | 102 | 7  | 10 |
| P06745 | Glucose-6-phosphate isomerase (EC 5.3.1.9) (GPI) (Phosphoglucose isomerase) (PGI) (Phosphohexose isomerase) (PHI) (Neuroleukin) (NLK) - Mus musculus (Mouse)                                                                                               | 62956  | 39 | 107 | 12 | 22 |
| Q61839 | C-type natriuretic peptide precursor [Contains: CNP-22; CNP-29; CNP-53] - Mus musculus (Mouse)                                                                                                                                                             | 13483  | 39 | 0   | 6  | 0  |
| Q923G2 | DNA-directed RNA polymerases I, II, and III 17.1 kDa polypeptide (EC 2.7.7.6) (RPB17) (RPB8) - Mus musculus (Mouse)                                                                                                                                        | 17189  | 39 | 0   | 3  | 0  |
| Q62168 | Keratin, type I cuticular Ha2 (Hair keratin, type I Ha2) (Keratin-32) - Mus musculus (Mouse)                                                                                                                                                               | 47501  | 39 | 36  | 9  | 6  |
| P70195 | Proteasome subunit beta type 7 precursor (EC 3.4.25.1) (Proteasome subunit Z) (Macropain chain Z) (Multicatalytic endopeptidase complex chain Z) - Mus musculus (Mouse)                                                                                    | 30214  | 39 | 40  | 8  | 7  |
| P19246 | Neurofilament triplet H protein (200 kDa neurofilament protein) (Neurofilament heavy polypeptide) (NF-H) - Mus musculus (Mouse)                                                                                                                            | 117209 | 38 | 0   | 22 | 0  |
| Q80YA8 | Crumbs homolog 2 (Crumbs-like protein 2) (Fragment) - Mus musculus (Mouse)                                                                                                                                                                                 | 136931 | 38 | 0   | 5  | 0  |

|        |                                                                                                                                                             |        |    |    |    |    |
|--------|-------------------------------------------------------------------------------------------------------------------------------------------------------------|--------|----|----|----|----|
| Q9D009 | Lipoyltransferase 1, mitochondrial precursor (EC 6.-.-) (Lipoate-protein ligase) (Lipoate biosynthesis protein) (Lipoyl ligase) - Mus musculus (Mouse)      | 42746  | 38 | 42 | 11 | 19 |
| Q62522 | Zona pellucida-binding protein 1 precursor (Sp38) - Mus musculus (Mouse)                                                                                    | 40118  | 38 | 42 | 8  | 12 |
| Q99PG2 | Opioid growth factor receptor (OGFr) (Zeta-type opioid receptor) - Mus musculus (Mouse)                                                                     | 71206  | 38 | 24 | 8  | 7  |
| Q99PJ2 | Tripartite motif-containing protein 8 (RING finger protein 27) (Glioblastoma-expressed RING finger protein) - Mus musculus (Mouse)                          | 63105  | 38 | 0  | 11 | 0  |
| Q9CYF5 | Williams-Beuren syndrome chromosome region 16 protein homolog - Mus musculus (Mouse)                                                                        | 50704  | 38 | 28 | 7  | 6  |
| Q68FL6 | Methionyl-tRNA synthetase, cytoplasmic (EC 6.1.1.10) (Methionine--tRNA ligase) (MetRS) - Mus musculus (Mouse)                                               | 102735 | 38 | 35 | 19 | 8  |
| Q9D6Z1 | Nucleolar protein Nop56 (Nucleolar protein 5A) - Mus musculus (Mouse)                                                                                       | 64880  | 38 | 39 | 14 | 13 |
| P63163 | Small nuclear ribonucleoprotein-associated protein N (snRNP-N) (Sm protein N) (Sm-N) (SmN) (Sm-D) (Tissue-specific-splicing protein) - Mus musculus (Mouse) | 24769  | 38 | 17 | 7  | 9  |
| P08553 | Neurofilament triplet M protein (160 kDa neurofilament protein) (Neurofilament medium polypeptide) (NF-M) - Mus musculus (Mouse)                            | 96098  | 38 | 0  | 12 | 0  |
| Q91VR5 | ATP-dependent RNA helicase DDX1 (EC 3.6.1.-) (DEAD box protein 1) - Mus musculus (Mouse)                                                                    | 83474  | 38 | 0  | 12 | 0  |
| Q99MR6 | Arsenite-resistance protein 2 - Mus musculus (Mouse)                                                                                                        | 100846 | 38 | 50 | 18 | 8  |
| Q9D8N3 | Transmembrane protein 86A - Mus musculus (Mouse)                                                                                                            | 26541  | 38 | 27 | 30 | 17 |

|        |                                                                                                                                           |        |    |    |    |    |
|--------|-------------------------------------------------------------------------------------------------------------------------------------------|--------|----|----|----|----|
| Q9QWL7 | Keratin, type I cytoskeletal 17 (Cytokeratin-17) (CK-17) (Keratin-17) (K17) - Mus musculus (Mouse)                                        | 48417  | 38 | 46 | 14 | 11 |
| Q61781 | Keratin, type I cytoskeletal 14 (Cytokeratin-14) (CK-14) (Keratin-14) (K14) - Mus musculus (Mouse)                                        | 53176  | 38 | 37 | 10 | 10 |
| Q8CH62 | Oral cancer overexpressed protein 1 homolog - Mus musculus (Mouse)                                                                        | 15383  | 37 | 31 | 14 | 15 |
| Q60848 | Lymphocyte-specific helicase (EC 3.6.1.-) (Proliferation associated SNF2-like protein) - Mus musculus (Mouse)                             | 95806  | 37 | 35 | 10 | 12 |
| Q8CCP0 | Serologically defined colon cancer antigen 1 - Mus musculus (Mouse)                                                                       | 121739 | 37 | 31 | 21 | 33 |
| Q9D0Q7 | 39S ribosomal protein L45, mitochondrial precursor (L45mt) (MRP-L45) - Mus musculus (Mouse)                                               | 35616  | 37 | 0  | 3  | 0  |
| O08648 | Mitogen-activated protein kinase kinase kinase 4 (EC 2.7.11.25) (MAPK/ERK kinase kinase 4) (MEK kinase 4) (MEKK 4) - Mus musculus (Mouse) | 181602 | 37 | 16 | 19 | 23 |
| P08730 | Keratin, type I cytoskeletal 13 (Cytokeratin-13) (CK-13) (Keratin-13) (K13) (47 kDa cytokeratin) - Mus musculus (Mouse)                   | 48066  | 37 | 46 | 13 | 12 |
| P19001 | Keratin, type I cytoskeletal 19 (Cytokeratin-19) (CK-19) (Keratin-19) (K19) - Mus musculus (Mouse)                                        | 44515  | 37 | 46 | 11 | 12 |
| P05784 | Keratin, type I cytoskeletal 18 (Cytokeratin-18) (CK-18) (Keratin-18) (K18) (Cytokeratin endo B) (Keratin D) - Mus musculus (Mouse)       | 47475  | 37 | 46 | 10 | 12 |
| Q9Z2K1 | Keratin, type I cytoskeletal 16 (Cytokeratin-16) (CK-16) (Keratin-16) (K16) - Mus musculus (Mouse)                                        | 51973  | 37 | 37 | 7  | 8  |
| Q61414 | Keratin, type I cytoskeletal 15 (Cytokeratin-15) (CK-15) (Keratin-15) (K15) - Mus musculus (Mouse)                                        | 49278  | 37 | 46 | 4  | 7  |

|        |                                                                                                                                                                                                                                                           |        |    |    |     |     |
|--------|-----------------------------------------------------------------------------------------------------------------------------------------------------------------------------------------------------------------------------------------------------------|--------|----|----|-----|-----|
| Q61765 | Keratin, type I cuticular Ha1 (Hair keratin, type I Ha1) (Keratin-31) (HKA-1) - Mus musculus (Mouse)                                                                                                                                                      | 48906  | 37 | 0  | 3   | 0   |
| O35664 | Interferon-alpha/beta receptor beta chain precursor (IFN-alpha-REC) (Type I interferon receptor) (IFN-R) (Interferon alpha/beta receptor 2) - Mus musculus (Mouse)                                                                                        | 57160  | 37 | 21 | 11  | 6   |
| P11881 | Inositol 1,4,5-trisphosphate receptor type 1 (Type 1 inositol 1,4,5-trisphosphate receptor) (Type 1 InsP3 receptor) (IP3 receptor isoform 1) (InsP3R1) (Inositol 1,4,5-trisphosphate-binding protein P400) (Purkinje cell protein 1) (Protein PCD-6) - Mu | 316420 | 37 | 42 | 48  | 41  |
| P26618 | Alpha platelet-derived growth factor receptor precursor (EC 2.7.10.1) (PDGF-R-alpha) (CD140a antigen) - Mus musculus (Mouse)                                                                                                                              | 123619 | 37 | 73 | 160 | 178 |
| Q68ED2 | Metabotropic glutamate receptor 7 precursor (mGluR7) - Mus musculus (Mouse)                                                                                                                                                                               | 103750 | 37 | 33 | 13  | 8   |
| Q9JIF7 | Coatomer subunit beta (Beta-coat protein) (Beta-COP) - Mus musculus (Mouse)                                                                                                                                                                               | 108138 | 37 | 22 | 15  | 15  |
| O89112 | LanC-like protein 1 (40 kDa erythrocyte membrane protein) (p40) - Mus musculus (Mouse)                                                                                                                                                                    | 46053  | 37 | 0  | 7   | 0   |
| Q9ET77 | Junctophilin-3 (Junctophilin type 3) (JP-3) - Mus musculus (Mouse)                                                                                                                                                                                        | 81579  | 37 | 31 | 20  | 22  |
| O88693 | Ceramide glucosyltransferase (EC 2.4.1.80) (Glucosylceramide synthase) (GCS) (UDP-glucose:N-acylsphingosine D-glucosyltransferase) (UDP-glucose ceramide glucosyltransferase) (GLCT-1) - Mus musculus (Mouse)                                             | 45436  | 37 | 50 | 7   | 7   |
| P46660 | Alpha-internexin (Alpha-Inx) (66 kDa neurofilament protein) (Neurofilament-66) (NF-66) - Mus musculus (Mouse)                                                                                                                                             | 55879  | 36 | 0  | 7   | 0   |

|        |                                                                                                                                                                                                                                             |        |    |     |    |    |
|--------|---------------------------------------------------------------------------------------------------------------------------------------------------------------------------------------------------------------------------------------------|--------|----|-----|----|----|
| P46664 | Adenylosuccinate synthetase isozyme 2 (EC 6.3.4.4) (Adenylosuccinate synthetase, non-muscle isozyme) (Adenylosuccinate synthetase, acidic isozyme) (IMP--aspartate ligase 2) (AdSS 2) (AMPSase 2) - Mus musculus (Mouse)                    | 50389  | 36 | 66  | 12 | 10 |
| Q7SIG6 | Development and differentiation-enhancing factor 2 (Pyk2 C-terminus-associated protein) (PAP) (Paxillin-associated protein with ARFGAP activity 3) (PAG3) - Mus musculus (Mouse)                                                            | 107992 | 36 | 43  | 7  | 17 |
| Q68FL4 | Putative adenylosuccinate synthetase 3 (EC 3.3.1.1) (S-adenosyl-L-homocysteine hydrolase 3) (AdoHcyase 3) - Mus musculus (Mouse)                                                                                                            | 67883  | 36 | 0   | 39 | 0  |
| Q8VI75 | Importin-4 (Importin 4a) (Imp4a) (Ran-binding protein 4) (RanBP4) - Mus musculus (Mouse)                                                                                                                                                    | 120624 | 36 | 0   | 8  | 0  |
| Q80U62 | Uncharacterized protein KIAA0226 - Mus musculus (Mouse)                                                                                                                                                                                     | 108617 | 36 | 19  | 7  | 15 |
| P48036 | Annexin A5 (Annexin V) (Lipocortin V) (Endonexin II) (Calphobindin I) (CBP-I) (Placental anticoagulant protein I) (PAP-I) (PP4) (Thromboplastin inhibitor) (Vascular anticoagulant-alpha) (VAC-alpha) (Anchorin CII) - Mus musculus (Mouse) | 35787  | 36 | 202 | 5  | 16 |
| P39447 | Tight junction protein ZO-1 (Zonula occludens 1 protein) (Zona occludens 1 protein) (Tight junction protein 1) - Mus musculus (Mouse)                                                                                                       | 194992 | 36 | 15  | 21 | 16 |
| Q8BHK0 | Paraneoplastic antigen Ma2 homolog - Mus musculus (Mouse)                                                                                                                                                                                   | 41631  | 36 | 22  | 9  | 5  |
| Q01065 | Calcium/calmodulin-dependent 3~,5~-cyclic nucleotide phosphodiesterase 1B (EC 3.1.4.17) (Cam-PDE 1B) (63 kDa Cam-PDE) - Mus musculus (Mouse)                                                                                                | 61700  | 36 | 0   | 5  | 0  |



|        |                                                                                                                                                                                                                             |        |    |     |    |    |
|--------|-----------------------------------------------------------------------------------------------------------------------------------------------------------------------------------------------------------------------------|--------|----|-----|----|----|
| Q99M73 | Keratin type II cuticular Hb4 (Type II hair keratin Hb4) (Keratin-84) (K84) (65 kDa type II keratin) - Mus musculus (Mouse)                                                                                                 | 65802  | 36 | 74  | 14 | 19 |
| Q9Z2T6 | Keratin type II cuticular Hb5 (Type II hair keratin Hb5) (Keratin-85) (K85) - Mus musculus (Mouse)                                                                                                                          | 57377  | 36 | 193 | 14 | 33 |
| P97861 | Keratin type II cuticular Hb6 (Type II hair keratin Hb6) (Keratin-86) (K86) - Mus musculus (Mouse)                                                                                                                          | 55098  | 36 | 183 | 14 | 31 |
| P07744 | Keratin, type II cytoskeletal 4 (Cytokeratin-4) (CK-4) (Keratin-4) (K4) (Cytoskeletal 57 kDa keratin) - Mus musculus (Mouse)                                                                                                | 56590  | 36 | 74  | 19 | 27 |
| O35381 | Acidic leucine-rich nuclear phosphoprotein 32 family member A (Potent heat-stable protein phosphatase 2A inhibitor 1PP2A) (Acidic nuclear phosphoprotein pp32) (Leucine-rich acidic nuclear protein) - Mus musculus (Mouse) | 28691  | 36 | 112 | 8  | 14 |
| Q8BSS9 | Liprin-alpha-2 (Protein tyrosine phosphatase receptor type f polypeptide-interacting protein alpha-2) (PTPRF-interacting protein alpha-2) - Mus musculus (Mouse)                                                            | 143659 | 36 | 21  | 22 | 22 |
| Q6DFX2 | Anthrax toxin receptor 2 precursor - Mus musculus (Mouse)                                                                                                                                                                   | 53721  | 36 | 0   | 10 | 0  |
| Q91YE5 | Bromodomain adjacent to zinc finger domain protein 2A (Transcription termination factor I-interacting protein 5) (TTF-I-interacting protein 5) (Tip5) - Mus musculus (Mouse)                                                | 207465 | 36 | 15  | 56 | 55 |
| Q5SPW0 | Vacuolar protein sorting-associated protein 54 (Tumor antigen SLP-8p homolog) - Mus musculus (Mouse)                                                                                                                        | 111467 | 36 | 28  | 13 | 15 |
| Q8VHK5 | Membrane protein MLC1 - Mus musculus (Mouse)                                                                                                                                                                                | 42253  | 35 | 25  | 22 | 17 |
| P02468 | Laminin subunit gamma-1 precursor (Laminin B2 chain) - Mus musculus (Mouse)                                                                                                                                                 | 182830 | 35 | 0   | 7  | 0  |

|        |                                                                                                                                                                                                             |        |    |     |    |    |
|--------|-------------------------------------------------------------------------------------------------------------------------------------------------------------------------------------------------------------|--------|----|-----|----|----|
| P97434 | Myosin phosphatase Rho-interacting protein (Rho-interacting protein 3) (p116Rip) (RIP3) - Mus musculus (Mouse)                                                                                              | 117192 | 35 | 23  | 25 | 19 |
| P05063 | Fructose-bisphosphate aldolase C (EC 4.1.2.13) (Brain-type aldolase) (Aldolase 3) (Zebrin II) (Scrapie-responsive protein 2) - Mus musculus (Mouse)                                                         | 39769  | 35 | 51  | 13 | 10 |
| Q8CJ27 | Abnormal spindle-like microcephaly-associated protein homolog (Calmodulin-binding protein 1) (Spindle and hydroxyurea checkpoint abnormal protein) (Calmodulin-binding protein Sha1) - Mus musculus (Mouse) | 367882 | 35 | 23  | 55 | 48 |
| Q6IFZ6 | Keratin, type II cytoskeletal 1b (Keratin-77) (Type II keratin Kb39) (Embryonic type II keratin-1) - Mus musculus (Mouse)                                                                                   | 61379  | 35 | 0   | 12 | 0  |
| Q922Y1 | SAPK substrate protein 1 (UBA/UBX 33.3 kDa protein) (mY33K) (Protein 2B28) - Mus musculus (Mouse)                                                                                                           | 33666  | 35 | 0   | 5  | 0  |
| Q8R1B4 | Eukaryotic translation initiation factor 3 subunit 8 (eIF3 p110) (eIF3c) - Mus musculus (Mouse)                                                                                                             | 106149 | 34 | 63  | 22 | 21 |
| Q8BRT1 | CLIP-associating protein 2 (Cytoplasmic linker-associated protein 2) - Mus musculus (Mouse)                                                                                                                 | 141564 | 34 | 0   | 6  | 0  |
| P26350 | Prothymosin alpha [Contains: Thymosin alpha] - Mus musculus (Mouse)                                                                                                                                         | 12247  | 34 | 120 | 2  | 2  |
| Q9EQ61 | Pescadillo homolog 1 - Mus musculus (Mouse)                                                                                                                                                                 | 68209  | 34 | 0   | 19 | 0  |
| Q63994 | Myeloid cell surface antigen CD33 precursor (Sialic acid-binding Ig-like lectin 3) (Siglec-3) - Mus musculus (Mouse)                                                                                        | 45822  | 34 | 34  | 7  | 6  |
| Q9D1R9 | 60S ribosomal protein L34 - Mus musculus (Mouse)                                                                                                                                                            | 13513  | 34 | 32  | 10 | 6  |

|        |                                                                                                                                                                                                                                                           |        |    |    |    |    |
|--------|-----------------------------------------------------------------------------------------------------------------------------------------------------------------------------------------------------------------------------------------------------------|--------|----|----|----|----|
| Q03146 | Epithelial discoidin domain-containing receptor 1 precursor (EC 2.7.10.1) (Epithelial discoidin domain receptor 1) (Tyrosine kinase DDR) (Discoidin receptor tyrosine kinase) (Tyrosine-protein kinase CAK) (Cell adhesion kinase) (Protein-tyrosine kina | 102122 | 34 | 0  | 7  | 0  |
| Q3UDW8 | Heparan-alpha-glucosaminide N-acetyltransferase (EC 2.3.1.78) (Transmembrane protein 76) - Mus musculus (Mouse)                                                                                                                                           | 73347  | 34 | 22 | 6  | 9  |
| O54951 | Semaphorin-6B precursor (Semaphorin VIB) (Sema VIB) (Semaphorin N) (Sema N) - Mus musculus (Mouse)                                                                                                                                                        | 96604  | 34 | 25 | 10 | 10 |
| Q8BKT3 | GC-rich sequence DNA-binding factor (GCF) (Transcription factor 9) (TCF-9) - Mus musculus (Mouse)                                                                                                                                                         | 88186  | 34 | 25 | 18 | 6  |
| Q9JI91 | Alpha-actinin-2 (Alpha actinin skeletal muscle isoform 2) (F-actin cross-linking protein) - Mus musculus (Mouse)                                                                                                                                          | 104215 | 34 | 0  | 7  | 0  |
| P41230 | Jumonji/ARID domain-containing protein 1C (Protein SmcX) (Protein Xe169) - Mus musculus (Mouse)                                                                                                                                                           | 177834 | 34 | 32 | 26 | 29 |
| P10148 | Small inducible cytokine A2 precursor (CCL2) (Monocyte chemotactic protein 1) (MCP-1) (Monocyte chemoattractant protein 1) (Platelet-derived growth factor-inducible protein JE) - Mus musculus (Mouse)                                                   | 16544  | 34 | 0  | 3  | 0  |
| Q9WU62 | Inner centromere protein - Mus musculus (Mouse)                                                                                                                                                                                                           | 101660 | 34 | 0  | 16 | 0  |
| Q64707 | U2 small nuclear ribonucleoprotein auxiliary factor 35 kDa subunit-related protein 1 (U2(RNU2) small nuclear RNA auxiliary factor 1-like 1) (CCCH type zinc finger, RNA-binding motif and serine/arginine rich protein 1) (SP2) - Mus musculus (Mouse)    | 51960  | 34 | 22 | 13 | 9  |

|        |                                                                                                                                                                                         |        |    |     |    |    |
|--------|-----------------------------------------------------------------------------------------------------------------------------------------------------------------------------------------|--------|----|-----|----|----|
| P0C1Q2 | Dual 3~,5~-cyclic-AMP and -GMP phosphodiesterase 11A (EC 3.1.4.17) (EC 3.1.4.35) (cAMP and cGMP phosphodiesterase 11A) - Mus musculus (Mouse)                                           | 105523 | 34 | 0   | 16 | 0  |
| P29341 | Polyadenylate-binding protein 1 (Poly(A)-binding protein 1) (PABP 1) - Mus musculus (Mouse)                                                                                             | 70826  | 34 | 0   | 10 | 0  |
| Q61092 | Laminin subunit gamma-2 precursor (Laminin 5 gamma 2 subunit) (Kalinin/nicein/epiligrin 100 kDa subunit) (Laminin B2t chain) - Mus musculus (Mouse)                                     | 133898 | 33 | 29  | 13 | 13 |
| P38647 | Stress-70 protein, mitochondrial precursor (75 kDa glucose-regulated protein) (GRP 75) (Peptide-binding protein 74) (PBP74) (P66 MOT) (Mortalin) - Mus musculus (Mouse)                 | 73768  | 33 | 33  | 12 | 13 |
| Q6ZQ58 | La-related protein 1 (La ribonucleoprotein domain family member 1) (Fragment) - Mus musculus (Mouse)                                                                                    | 42173  | 33 | 0   | 9  | 0  |
| Q99PP7 | Transcription intermediary factor 1-gamma (TIF1-gamma) (Tripartite motif-containing protein 33) - Mus musculus (Mouse)                                                                  | 125931 | 33 | 25  | 12 | 10 |
| Q7TMY8 | HECT, UBA and WWE domain-containing protein 1 (EC 6.3.2.-) (E3 ubiquitin protein ligase URE-B1) (E3Histone) - Mus musculus (Mouse)                                                      | 486295 | 33 | 91  | 39 | 36 |
| O88444 | Adenylate cyclase type 1 (EC 4.6.1.1) (Adenylate cyclase type I) (ATP pyrophosphate-lyase 1) (Adenylyl cyclase 1) (Ca(2+)/calmodulin-activated adenylyl cyclase) - Mus musculus (Mouse) | 125232 | 33 | 31  | 26 | 17 |
| Q8BKX6 | Serine/threonine-protein kinase SMG1 (EC 2.7.11.1) (SMG-1) - Mus musculus (Mouse)                                                                                                       | 413532 | 33 | 27  | 30 | 32 |
| Q8VHX6 | Filamin-C (Gamma-filamin) (Filamin-2) (FLN-C) (Actin-binding-like protein) (ABP-L) (ABP-280-like protein) - Mus musculus (Mouse)                                                        | 293560 | 33 | 115 | 18 | 25 |

|        |                                                                                                                                                                                                          |        |    |    |    |    |
|--------|----------------------------------------------------------------------------------------------------------------------------------------------------------------------------------------------------------|--------|----|----|----|----|
| O09010 | Beta-1,3-N-acetylglucosaminyltransferase lunatic fringe (EC 2.4.1.222) (O-fucosylpeptide 3-beta-N-acetylglucosaminyltransferase) - Mus musculus (Mouse)                                                  | 42439  | 33 | 33 | 8  | 10 |
| Q91V01 | Membrane-bound O-acyltransferase domain-containing protein 5 (EC 2.3.-.-) (O-acyltransferase domain-containing protein 5) (Transmembrane protein PTG) - Mus musculus (Mouse)                             | 56680  | 33 | 0  | 6  | 0  |
| Q9CQS6 | Blottin precursor - Mus musculus (Mouse)                                                                                                                                                                 | 20741  | 33 | 0  | 2  | 0  |
| Q8CIM1 | Leucine-rich repeat-containing protein 45 - Mus musculus (Mouse)                                                                                                                                         | 76763  | 33 | 71 | 27 | 35 |
| P58660 | Caspase recruitment domain-containing protein 10 (Bcl10-interacting MAGUK protein 1) (Bimp1) - Mus musculus (Mouse)                                                                                      | 115598 | 33 | 23 | 15 | 17 |
| Q8VC12 | Probable urocanate hydratase (EC 4.2.1.49) (Urocanase) (Imidazolonepropionate hydrolase) - Mus musculus (Mouse)                                                                                          | 75227  | 33 | 26 | 11 | 12 |
| Q6P8J2 | Diamine acetyltransferase 2 (EC 2.3.1.57) (Spermidine/spermine N(1)-acetyltransferase 2) (Polyamine N-acetyltransferase 2) - Mus musculus (Mouse)                                                        | 19464  | 33 | 23 | 6  | 8  |
| P12367 | cAMP-dependent protein kinase type II-alpha regulatory subunit - Mus musculus (Mouse)                                                                                                                    | 45703  | 33 | 23 | 5  | 5  |
| Q8R2S9 | Actin-related protein 8 - Mus musculus (Mouse)                                                                                                                                                           | 71413  | 33 | 0  | 12 | 0  |
| P63276 | 40S ribosomal protein S17 - Mus musculus (Mouse)                                                                                                                                                         | 15571  | 33 | 0  | 4  | 0  |
| Q60692 | Proteasome subunit beta type 6 precursor (EC 3.4.25.1) (Proteasome delta chain) (Macropain delta chain) (Multicatalytic endopeptidase complex delta chain) (Proteasome subunit Y) - Mus musculus (Mouse) | 25591  | 33 | 89 | 17 | 12 |
| Q7TMK6 | Hook homolog 2 - Mus musculus (Mouse)                                                                                                                                                                    | 83903  | 33 | 36 | 26 | 20 |

|        |                                                                                                                                                      |        |    |     |    |    |
|--------|------------------------------------------------------------------------------------------------------------------------------------------------------|--------|----|-----|----|----|
| Q9JL70 | Fanconi anemia group A protein homolog (Protein FACA) - Mus musculus (Mouse)                                                                         | 163682 | 33 | 0   | 25 | 0  |
| Q35551 | Rab GTPase-binding effector protein 1 (Rabaptin-5) (Rabaptin-5alpha) - Mus musculus (Mouse)                                                          | 99890  | 33 | 26  | 26 | 16 |
| Q62159 | Rho-related GTP-binding protein RhoC precursor (Silica-induced gene 61 protein) (SIG-61) - Mus musculus (Mouse)                                      | 22334  | 33 | 173 | 5  | 9  |
| Q80XA6 | RalBP1-associated Eps domain-containing protein 2 (RalBP1-interacting protein 2) (Partner of RalBP1) - Mus musculus (Mouse)                          | 57999  | 33 | 31  | 6  | 7  |
| Q8CG48 | Structural maintenance of chromosomes protein 2 (Chromosome-associated protein E) (XCAP-E homolog) (FGF-inducible protein 16) - Mus musculus (Mouse) | 134703 | 32 | 36  | 41 | 26 |
| Q9WVP9 | Interferon-induced GTP-binding protein Mx2 - Mus musculus (Mouse)                                                                                    | 74759  | 32 | 22  | 14 | 20 |
| Q9Z0T6 | Polycystic kidney disease and receptor for egg jelly-related protein precursor (PKD and REJ homolog) - Mus musculus (Mouse)                          | 243630 | 32 | 32  | 18 | 12 |
| P35980 | 60S ribosomal protein L18 - Mus musculus (Mouse)                                                                                                     | 21688  | 32 | 22  | 51 | 85 |
| Q8K2A7 | Integrator complex subunit 10 (Int10) - Mus musculus (Mouse)                                                                                         | 83107  | 32 | 47  | 21 | 12 |
| Q8BT60 | Copine-3 (Copine III) - Mus musculus (Mouse)                                                                                                         | 60288  | 32 | 0   | 7  | 0  |
| Q9CQG9 | Transmembrane protein 100 - Mus musculus (Mouse)                                                                                                     | 14723  | 32 | 19  | 2  | 2  |
| Q8R4K2 | Interleukin-1 receptor-associated kinase 4 (EC 2.7.11.1) (IRAK-4) - Mus musculus (Mouse)                                                             | 51410  | 32 | 47  | 22 | 22 |
| Q6A078 | Centrosomal protein Cep290 (Nephrocystin-6) - Mus musculus (Mouse)                                                                                   | 289241 | 32 | 57  | 85 | 66 |
| Q80VC9 | Uncharacterized protein KIAA1543 - Mus musculus (Mouse)                                                                                              | 135890 | 32 | 27  | 10 | 6  |

|        |                                                                                                                                                                                                                                                           |        |    |     |    |    |
|--------|-----------------------------------------------------------------------------------------------------------------------------------------------------------------------------------------------------------------------------------------------------------|--------|----|-----|----|----|
| Q80TZ3 | Putative tyrosine-protein phosphatase auxilin (EC 3.1.3.48) (DnaJ homolog subfamily C member 6) - Mus musculus (Mouse)                                                                                                                                    | 103033 | 32 | 0   | 10 | 0  |
| Q8BZ36 | RAD50-interacting protein 1 (RAD50 interactor 1) (Protein RINT-1) - Mus musculus (Mouse)                                                                                                                                                                  | 90891  | 32 | 0   | 11 | 0  |
| Q80W68 | Kin of IRRE-like protein 1 precursor (Kin of irregular chiasm-like protein 1) (Nephrin-like protein 1) - Mus musculus (Mouse)                                                                                                                             | 87806  | 32 | 38  | 22 | 17 |
| Q8BGT9 | Polypeptide N-acetylgalactosaminyltransferase 12 (EC 2.4.1.41) (Protein-UDP acetylgalactosaminyltransferase 12) (UDP-GalNAc:polypeptide N-acetylgalactosaminyltransferase 12) (Polypeptide GalNAc transferase 12) (GalNAc-T12) (pp-GaNTase 12) - Mus musc | 67354  | 32 | 0   | 15 | 0  |
| Q9R155 | Pendrin (Sodium-independent chloride/iodide transporter) (Solute carrier family 26 member 4) - Mus musculus (Mouse)                                                                                                                                       | 86260  | 32 | 18  | 3  | 6  |
| P61205 | ADP-ribosylation factor 3 - Mus musculus (Mouse)                                                                                                                                                                                                          | 20645  | 32 | 423 | 6  | 17 |
| Q8VC28 | Aldo-keto reductase family 1 member C13 (EC 1.1.1.-) - Mus musculus (Mouse)                                                                                                                                                                               | 37604  | 32 | 23  | 8  | 8  |
| Q6TXD4 | Dynamamin-binding protein (Scaffold protein Tuba) - Mus musculus (Mouse)                                                                                                                                                                                  | 178877 | 32 | 21  | 13 | 12 |
| P28656 | Nucleosome assembly protein 1-like 1 (NAP-1-related protein) (Brain protein DN38) - Mus musculus (Mouse)                                                                                                                                                  | 45602  | 32 | 0   | 7  | 0  |
| P55264 | Adenosine kinase (EC 2.7.1.20) (AK) (Adenosine 5~-phosphotransferase) - Mus musculus (Mouse)                                                                                                                                                              | 40466  | 32 | 0   | 8  | 0  |
| Q9R0K7 | Plasma membrane calcium-transporting ATPase 2 (EC 3.6.3.8) (PMCA2) (Plasma membrane calcium pump isoform 2) (Plasma membrane calcium ATPase isoform 2) - Mus musculus (Mouse)                                                                             | 133701 | 32 | 27  | 70 | 83 |

|        |                                                                                                                                                                                                                                                           |        |    |    |    |     |
|--------|-----------------------------------------------------------------------------------------------------------------------------------------------------------------------------------------------------------------------------------------------------------|--------|----|----|----|-----|
| Q8BHS8 | Syntabulin (Syntaxin-1-binding protein) (Golgi-localized syntaphilin-related protein) (m-Golsyn) - Mus musculus (Mouse)                                                                                                                                   | 73662  | 32 | 19 | 17 | 13  |
| Q3U0P1 | Partner and localizer of BRCA2 - Mus musculus (Mouse)                                                                                                                                                                                                     | 120734 | 32 | 0  | 7  | 0   |
| Q8BGI1 | RING finger protein 24 - Mus musculus (Mouse)                                                                                                                                                                                                             | 17755  | 32 | 0  | 4  | 0   |
| Q8BYC6 | Serine/threonine-protein kinase TAO3 (EC 2.7.11.1) (Thousand and one amino acid protein 3) - Mus musculus (Mouse)                                                                                                                                         | 105726 | 32 | 38 | 9  | 16  |
| Q61983 | Sodium-dependent phosphate transport protein 1 (Sodium/phosphate cotransporter 1) (Na(+)/PI cotransporter 1) (Solute carrier family 17 member 1) (Renal sodium-dependent phosphate transport protein 1) (Renal sodium-phosphate transport protein 1) (Ren | 52239  | 31 | 33 | 8  | 5   |
| Q8BJA3 | Homeobox-containing protein 1 - Mus musculus (Mouse)                                                                                                                                                                                                      | 47258  | 31 | 0  | 4  | 0   |
| P56716 | Oxygen-regulated protein 1 (Retinitis pigmentosa RP1 protein homolog) - Mus musculus (Mouse)                                                                                                                                                              | 236693 | 31 | 49 | 58 | 104 |
| Q921C5 | Protein bicaudal D homolog 2 (Bic-D 2) - Mus musculus (Mouse)                                                                                                                                                                                             | 93562  | 31 | 23 | 26 | 34  |
| Q8VI47 | Canalicular multispecific organic anion transporter 1 (ATP-binding cassette sub-family C member 2) - Mus musculus (Mouse)                                                                                                                                 | 174900 | 31 | 38 | 39 | 31  |
| Q80UN9 | tRNA isopentenyltransferase, mitochondrial precursor (EC 2.5.1.8) (Isopentenyl-diphosphate:tRNA isopentenyltransferase) (IPP transferase) (IPTase) (IPPT) - Mus musculus (Mouse)                                                                          | 52746  | 31 | 24 | 19 | 15  |
| Q8C7H1 | Methylmalonic aciduria type A homolog, mitochondrial precursor - Mus musculus (Mouse)                                                                                                                                                                     | 46359  | 31 | 37 | 16 | 10  |
| Q8C166 | Copine-1 (Copine I) - Mus musculus (Mouse)                                                                                                                                                                                                                | 59591  | 31 | 0  | 6  | 0   |



|        |                                                                                                                                                                                                                                                           |        |    |    |    |    |
|--------|-----------------------------------------------------------------------------------------------------------------------------------------------------------------------------------------------------------------------------------------------------------|--------|----|----|----|----|
| Q35206 | Collagen alpha-1(XV) chain precursor [Contains: Endostatin (Endostatin-XV)] - Mus musculus (Mouse)                                                                                                                                                        | 140894 | 31 | 37 | 12 | 11 |
| Q8C3Y4 | Kinetochores-associated protein 1 - Mus musculus (Mouse)                                                                                                                                                                                                  | 253106 | 31 | 0  | 20 | 0  |
| Q8K1J6 | tRNA-nucleotidyltransferase 1, mitochondrial precursor (EC 2.7.7.25) (mitochondrial tRNA nucleotidyl transferase, CCA-adding) (mt tRNA adenylyltransferase) (mt tRNA CCA-pyrophosphorylase) (mt tRNA CCA-diphosphorylase) (mt CCA-adding enzyme) - Mus mu | 50035  | 31 | 0  | 17 | 0  |
| Q62446 | FK506-binding protein 3 (EC 5.2.1.8) (Peptidyl-prolyl cis-trans isomerase) (PPIase) (Rotamase) (25 kDa FKBP) (FKBP-25) (Rapamycin-selective 25 kDa immunophilin) - Mus musculus (Mouse)                                                                   | 25189  | 31 | 31 | 10 | 11 |
| Q9JJY3 | Sphingomyelin phosphodiesterase 3 (EC 3.1.4.12) (Neutral sphingomyelinase 2) (Neutral sphingomyelinase II) (nSMase2) (nSMase-2) - Mus musculus (Mouse)                                                                                                    | 72406  | 31 | 0  | 7  | 0  |
| Q9Z309 | Calcium and integrin-binding protein 2 (Kinase-interacting protein 2) (KIP 2) - Mus musculus (Mouse)                                                                                                                                                      | 21918  | 31 | 17 | 3  | 5  |
| O70228 | Probable phospholipid-transporting ATPase IIA (EC 3.6.3.1) (ATPase class II type 9A) - Mus musculus (Mouse)                                                                                                                                               | 120163 | 31 | 29 | 37 | 28 |
| Q9D8N0 | Elongation factor 1-gamma (EF-1-gamma) (eEF-1B gamma) - Mus musculus (Mouse)                                                                                                                                                                              | 50371  | 31 | 85 | 11 | 12 |
| Q35464 | Semaphorin-6A precursor (Semaphorin VIA) (Sema VIA) (Semaphorin 6A-1) (SEMA6A-1) (Semaphorin Q) (Sema Q) - Mus musculus (Mouse)                                                                                                                           | 115786 | 31 | 0  | 18 | 0  |
| Q31125 | Zinc transporter SLC39A7 (Solute carrier family 39 member 7) (Histidine-rich membrane protein Ke4) - Mus musculus (Mouse)                                                                                                                                 | 50796  | 31 | 0  | 6  | 0  |
| Q80TS7 | Dendrin - Mus musculus (Mouse)                                                                                                                                                                                                                            | 70861  | 31 | 24 | 11 | 8  |

|        |                                                                                                                                                                               |        |    |    |     |     |
|--------|-------------------------------------------------------------------------------------------------------------------------------------------------------------------------------|--------|----|----|-----|-----|
| Q8BQQ1 | Probable palmitoyltransferase ZDHHC14 (EC 2.3.1.-) (Zinc finger DHHC domain-containing protein 14) (DHHC-14) (NEW1 domain-containing protein) (NEW1CP) - Mus musculus (Mouse) | 54593  | 31 | 0  | 1   | 0   |
| Q9R0P3 | S-formylglutathione hydrolase (EC 3.1.2.12) (FGH) (Esterase D) (Esterase 10) (Sid 478) - Mus musculus (Mouse)                                                                 | 31870  | 31 | 0  | 2   | 0   |
| Q91X52 | L-xylulose reductase (EC 1.1.1.10) (XR) (Dicarbonyl/L-xylulose reductase) - Mus musculus (Mouse)                                                                              | 25958  | 31 | 0  | 11  | 0   |
| P56480 | ATP synthase subunit beta, mitochondrial precursor (EC 3.6.3.14) - Mus musculus (Mouse)                                                                                       | 56265  | 31 | 50 | 8   | 6   |
| Q8R4U7 | Leucine zipper protein 1 (Leucine zipper motif-containing protein) - Mus musculus (Mouse)                                                                                     | 119809 | 31 | 32 | 22  | 20  |
| Q8K1N2 | Pleckstrin homology-like domain family B member 2 (Protein LL5-beta) - Mus musculus (Mouse)                                                                                   | 142253 | 31 | 31 | 48  | 32  |
| P63001 | Ras-related C3 botulinum toxin substrate 1 precursor (p21-Rac1) - Mus musculus (Mouse)                                                                                        | 21835  | 31 | 99 | 7   | 11  |
| Q9D7S1 | Transmembrane protein 54 - Mus musculus (Mouse)                                                                                                                               | 24095  | 31 | 0  | 1   | 0   |
| Q14CH7 | Probable alanyl-tRNA synthetase, mitochondrial precursor (EC 6.1.1.7) (Alanine--tRNA ligase) (AlaRS) (Alanyl-tRNA synthetase-like) - Mus musculus (Mouse)                     | 107743 | 30 | 33 | 197 | 263 |
| Q8K2I9 | F-box only protein 18 (EC 3.6.1.-) (F-box DNA helicase 1) - Mus musculus (Mouse)                                                                                              | 120104 | 30 | 23 | 9   | 5   |
| Q9JJG0 | Transforming acidic coiled-coil-containing protein 2 - Mus musculus (Mouse)                                                                                                   | 124966 | 30 | 0  | 21  | 0   |

|        |                                                                                                                                                                                                                                                         |        |    |    |    |    |
|--------|---------------------------------------------------------------------------------------------------------------------------------------------------------------------------------------------------------------------------------------------------------|--------|----|----|----|----|
| Q9Z104 | SWI/SNF-related matrix-associated actin-dependent regulator of chromatin subfamily E member 1-related (SMARCE1-related protein) (HMG domain protein HMG20B) (Structural DNA-binding protein BRAF35) (BRCA2-associated factor 35) - Mus musculus (Mouse) | 35962  | 30 | 20 | 14 | 15 |
| Q7TT45 | Ras-related GTP-binding protein D (Rag D) - Mus musculus (Mouse)                                                                                                                                                                                        | 51656  | 30 | 0  | 14 | 0  |
| Q8BZQ7 | Anaphase-promoting complex subunit 2 (APC2) (Cyclosome subunit 2) - Mus musculus (Mouse)                                                                                                                                                                | 96116  | 30 | 0  | 10 | 0  |
| P62962 | Profilin-1 (Profilin I) - Mus musculus (Mouse)                                                                                                                                                                                                          | 15119  | 30 | 93 | 4  | 7  |
| Q8VCE1 | J domain-containing protein C21orf55 homolog - Mus musculus (Mouse)                                                                                                                                                                                     | 40958  | 30 | 0  | 3  | 0  |
| O88569 | Heterogeneous nuclear ribonucleoproteins A2/B1 (hnRNP A2 / hnRNP B1) - Mus musculus (Mouse)                                                                                                                                                             | 37437  | 30 | 0  | 5  | 0  |
| Q9QZ41 | Protein DBF4 homolog (MuDBF4) - Mus musculus (Mouse)                                                                                                                                                                                                    | 75042  | 30 | 0  | 19 | 0  |
| P70298 | Homeobox protein cut-like 2 (Homeobox protein Cux-2) (Cut-like 2) - Mus musculus (Mouse)                                                                                                                                                                | 155464 | 30 | 22 | 12 | 13 |
| P36895 | Bone morphogenetic protein receptor type IA precursor (EC 2.7.11.30) (Serine/threonine-protein kinase receptor R5) (SKR5) (Activin receptor-like kinase 3) (ALK-3) (BMP-2/BMP-4 receptor) - Mus musculus (Mouse)                                        | 61392  | 30 | 0  | 2  | 0  |
| Q9CVB6 | Actin-related protein 2/3 complex subunit 2 (ARP2/3 complex 34 kDa subunit) (p34-ARC) - Mus musculus (Mouse)                                                                                                                                            | 34450  | 30 | 0  | 11 | 0  |
| Q8CDU6 | Probable E3 ubiquitin-protein ligase HECTD2 (HECT domain-containing protein 2) - Mus musculus (Mouse)                                                                                                                                                   | 88529  | 30 | 0  | 12 | 0  |
| P54731 | FAS-associated factor 1 (Protein FAF1) - Mus musculus (Mouse)                                                                                                                                                                                           | 74244  | 30 | 0  | 6  | 0  |
| P25233 | Necdin - Mus musculus (Mouse)                                                                                                                                                                                                                           | 36979  | 30 | 23 | 16 | 12 |

|        |                                                                                                                                                                                   |        |    |    |    |    |
|--------|-----------------------------------------------------------------------------------------------------------------------------------------------------------------------------------|--------|----|----|----|----|
| Q8CGM2 | Retinitis pigmentosa 1-like 1 protein (Retinitis pigmentosa 1-like protein 1) - Mus musculus (Mouse)                                                                              | 202299 | 30 | 21 | 58 | 60 |
| Q61122 | NGFI-A-binding protein 1 (EGR-1-binding protein 1) - Mus musculus (Mouse)                                                                                                         | 54461  | 30 | 25 | 6  | 7  |
| P03987 | Ig gamma-3 chain C region, membrane-bound form - Mus musculus (Mouse)                                                                                                             | 44472  | 30 | 34 | 4  | 7  |
| Q80Y17 | Lethal(2) giant larvae protein homolog 1 (LLGL) (Mlg1) (Mgl-1) - Mus musculus (Mouse)                                                                                             | 113801 | 30 | 29 | 7  | 11 |
| Q3TXZ1 | Zinc finger protein 575 - Mus musculus (Mouse)                                                                                                                                    | 27120  | 30 | 25 | 5  | 5  |
| Q8BFQ9 | Kelch domain-containing protein 5 - Mus musculus (Mouse)                                                                                                                          | 56247  | 30 | 22 | 10 | 17 |
| Q8VD72 | Tetratricopeptide repeat protein 8 (TPR repeat protein 8) (Bardet-Biedl syndrome 8 protein homolog) - Mus musculus (Mouse)                                                        | 58916  | 30 | 23 | 13 | 4  |
| Q8K0Z7 | Coiled-coil domain-containing protein 44 - Mus musculus (Mouse)                                                                                                                   | 32750  | 30 | 22 | 12 | 5  |
| Q8BX17 | Gem-associated protein 5 (Gemin5) - Mus musculus (Mouse)                                                                                                                          | 169080 | 30 | 0  | 19 | 0  |
| Q18PE0 | Protein Dok-7 (Downstream of tyrosine kinase 7) - Mus musculus (Mouse)                                                                                                            | 53885  | 30 | 0  | 14 | 0  |
| P04214 | T-cell receptor beta chain V region E1 precursor - Mus musculus (Mouse)                                                                                                           | 15870  | 30 | 0  | 1  | 0  |
| O08983 | Hermansky-Pudlak syndrome 1 protein homolog - Mus musculus (Mouse)                                                                                                                | 80487  | 30 | 17 | 27 | 10 |
| Q8R4B8 | Cold autoinflammatory syndrome 1 protein homolog (PYRIN-containing APAF1-like protein 1) (Mast cell maturation-associated-inducible protein 1) (Cryopyrin) - Mus musculus (Mouse) | 120935 | 30 | 20 | 24 | 23 |
| Q8K0D0 | Serine/threonine-protein kinase PCTAIRE-2 (EC 2.7.11.22) (PCTAIRE-motif protein kinase 2) - Mus musculus (Mouse)                                                                  | 59754  | 30 | 0  | 12 | 0  |
| Q60673 | Receptor-type tyrosine-protein phosphatase-like N precursor (R-PTP-N) (PTP IA-2) - Mus musculus (Mouse)                                                                           | 106990 | 30 | 18 | 14 | 10 |

|        |                                                                                                                                                                                                            |        |    |     |    |    |
|--------|------------------------------------------------------------------------------------------------------------------------------------------------------------------------------------------------------------|--------|----|-----|----|----|
| Q8BYW1 | Rho GTPase-activating protein 25 - Mus musculus (Mouse)                                                                                                                                                    | 73679  | 30 | 26  | 6  | 10 |
| Q61771 | Kinesin-like protein KIF3B (Microtubule plus end-directed kinesin motor 3B) - Mus musculus (Mouse)                                                                                                         | 85350  | 30 | 51  | 16 | 19 |
| Q6P9Z1 | SWI/SNF-related matrix-associated actin-dependent regulator of chromatin subfamily D member 3 (60 kDa BRG-1/Brm-associated factor subunit C) (BRG1-associated factor 60C) (mBAF60c) - Mus musculus (Mouse) | 55180  | 29 | 19  | 46 | 50 |
| Q99PF4 | Cadherin-23 precursor (Otocadherin) - Mus musculus (Mouse)                                                                                                                                                 | 370092 | 29 | 32  | 29 | 27 |
| P24547 | Inosine-5~monophosphate dehydrogenase 2 (EC 1.1.1.205) (IMP dehydrogenase 2) (IMPDH-II) (IMPD 2) - Mus musculus (Mouse)                                                                                    | 56179  | 29 | 0   | 3  | 0  |
| P56959 | RNA-binding protein FUS (Pigpen protein) - Mus musculus (Mouse)                                                                                                                                            | 52870  | 29 | 27  | 11 | 4  |
| Q9D2N9 | Vacuolar protein sorting-associated protein 33A - Mus musculus (Mouse)                                                                                                                                     | 67897  | 29 | 0   | 7  | 0  |
| Q9DBR1 | 5~3~ exoribonuclease 2 (EC 3.1.13.-) (Protein Dhml) - Mus musculus (Mouse)                                                                                                                                 | 109588 | 29 | 20  | 23 | 8  |
| Q9QUM7 | MutS protein homolog 5 - Mus musculus (Mouse)                                                                                                                                                              | 93455  | 29 | 0   | 7  | 0  |
| Q61990 | Poly(rC)-binding protein 2 (Alpha CP2) (Putative heterogeneous nuclear ribonucleoprotein X) (hnRNP X) (CTBP) (CBP) - Mus musculus (Mouse)                                                                  | 38597  | 29 | 194 | 7  | 11 |
| P49717 | DNA replication licensing factor MCM4 (CDC21 homolog) (P1-CDC21) - Mus musculus (Mouse)                                                                                                                    | 97360  | 29 | 18  | 11 | 12 |
| Q80U57 | Regulating synaptic membrane exocytosis protein 3 (Nim3) (Rab 3-interacting molecule 3) (RIM 3) (RIM3 gamma) - Mus musculus (Mouse)                                                                        | 32854  | 29 | 0   | 4  | 0  |

|        |                                                                                                                                                                                                                                                       |        |    |    |    |    |
|--------|-------------------------------------------------------------------------------------------------------------------------------------------------------------------------------------------------------------------------------------------------------|--------|----|----|----|----|
| P35969 | Vascular endothelial growth factor receptor 1 precursor (EC 2.7.10.1) (VEGFR-1) (Tyrosine-protein kinase receptor FLT) (FLT-1) (Embryonic receptor kinase 2) - Mus musculus (Mouse)                                                                   | 151663 | 29 | 36 | 35 | 32 |
| P63143 | Voltage-gated potassium channel subunit beta-1 (K(+) channel subunit beta-1) (Kv-beta-1) - Mus musculus (Mouse)                                                                                                                                       | 45080  | 29 | 76 | 12 | 20 |
| Q80U87 | Ubiquitin carboxyl-terminal hydrolase 8 (EC 3.1.2.15) (Ubiquitin thioesterase 8) (Ubiquitin-specific-processing protease 8) (Deubiquitinating enzyme 8) (mUBPy) - Mus musculus (Mouse)                                                                | 123447 | 29 | 23 | 24 | 15 |
| Q02956 | Protein kinase C zeta type (EC 2.7.11.13) (nPKC-zeta) - Mus musculus (Mouse)                                                                                                                                                                          | 68493  | 29 | 15 | 8  | 6  |
| Q9JIL4 | PDZ domain-containing protein 1 (CFTR-associated protein of 70 kDa) (Na/Pi cotransporter C-terminal-associated protein) (NaPi-Cap1) (Na(+)/H(+) exchanger regulatory factor 3) (Sodium-hydrogen exchanger regulatory factor 3) - Mus musculus (Mouse) | 56863  | 29 | 39 | 9  | 8  |
| Q91ZU8 | Bullous pemphigoid antigen 1, isoform 5 (BPA) (Hemidesmosomal plaque protein) (Dystonia musculorum protein) (Dystonin) - Mus musculus (Mouse)                                                                                                         | 303786 | 29 | 0  | 53 | 0  |
| Q9DB77 | Ubiquinol-cytochrome-c reductase complex core protein 2, mitochondrial precursor (EC 1.10.2.2) (Core protein II) (Complex III subunit II) - Mus musculus (Mouse)                                                                                      | 48262  | 29 | 20 | 13 | 13 |
| Q35685 | Nuclear migration protein nudC (Nuclear distribution protein C homolog) (Silica-induced gene 92 protein) (SIG-92) - Mus musculus (Mouse)                                                                                                              | 38334  | 29 | 0  | 7  | 0  |
| P11983 | T-complex protein 1 subunit alpha B (TCP-1-alpha) (CCT-alpha) (Tailless complex polypeptide 1B) (TCP-1-B) - Mus musculus (Mouse)                                                                                                                      | 60867  | 29 | 66 | 18 | 15 |

|        |                                                                                                                                                                                                                                |        |    |    |    |    |
|--------|--------------------------------------------------------------------------------------------------------------------------------------------------------------------------------------------------------------------------------|--------|----|----|----|----|
| P11984 | T-complex protein 1 subunit alpha A (TCP-1-alpha) (CCT-alpha) (Tailless complex polypeptide 1A) (TCP-1-A) - Mus musculus (Mouse)                                                                                               | 60930  | 29 | 66 | 14 | 15 |
| Q7TQH0 | Ataxin-2-like protein - Mus musculus (Mouse)                                                                                                                                                                                   | 110865 | 29 | 28 | 18 | 8  |
| Q9JI78 | Peptide-N(4)-(N-acetyl-beta-glucosaminy)asparagine amidase (EC 3.5.1.52) (PNGase) (mPNGase) (Peptide:N-glycanase) (N-glycanase 1) - Mus musculus (Mouse)                                                                       | 75198  | 29 | 32 | 19 | 11 |
| Q91ZT5 | FYVE, RhoGEF and PH domain-containing protein 4 (Actin filament-binding protein frabin) (FGD1-related F-actin-binding protein) - Mus musculus (Mouse)                                                                          | 87513  | 29 | 19 | 10 | 11 |
| Q9JJU8 | SH3 domain-binding glutamic acid-rich-like protein - Mus musculus (Mouse)                                                                                                                                                      | 12917  | 29 | 69 | 2  | 4  |
| Q9Z268 | RasGAP-activating-like protein 1 - Mus musculus (Mouse)                                                                                                                                                                        | 90285  | 29 | 0  | 12 | 0  |
| Q9D4Q1 | RIB43A-like with coiled-coils protein 2 - Mus musculus (Mouse)                                                                                                                                                                 | 37528  | 29 | 26 | 16 | 13 |
| Q8CD91 | SPARC-related modular calcium-binding protein 2 precursor (Secreted modular calcium-binding protein 2) (SMOC-2) - Mus musculus (Mouse)                                                                                         | 51171  | 29 | 16 | 16 | 11 |
| P09586 | Chorionic somatomammotropin hormone 2 precursor (Placental lactogen II) (PL-II) - Mus musculus (Mouse)                                                                                                                         | 25428  | 29 | 21 | 2  | 2  |
| P59270 | Galactosylgalactosylxylosylprotein 3-beta-glucuronosyltransferase 2 (EC 2.4.1.135) (Beta-1,3-glucuronosyltransferase 2) (Glucuronosyltransferase-S) (GlcAT-S) (UDP-glucuronosyltransferase-S) (GlcAT-D) - Mus musculus (Mouse) | 37280  | 29 | 16 | 9  | 11 |
| Q91YJ5 | Translation initiation factor IF-2, mitochondrial precursor (IF-2Mt) (IF-2(Mt)) - Mus musculus (Mouse)                                                                                                                         | 81809  | 29 | 23 | 13 | 9  |

|        |                                                                                                                                                                                                                                         |       |    |     |    |    |
|--------|-----------------------------------------------------------------------------------------------------------------------------------------------------------------------------------------------------------------------------------------|-------|----|-----|----|----|
| Q80SW1 | Putative adenosylhomocysteinase 2 (EC 3.3.1.1) (S-adenosyl-L-homocysteine hydrolase 2) (AdoHcyase 2) (S-adenosylhomocysteine hydrolase-like 1) (IP3R-binding protein released with inositol 1,4,5-trisphosphate) - Mus musculus (Mouse) | 59997 | 29 | 0   | 22 | 0  |
| P00536 | Proto-oncogene serine/threonine-protein kinase mos (EC 2.7.11.1) (c-mos) (Oocyte maturation factor mos) - Mus musculus (Mouse)                                                                                                          | 43548 | 29 | 0   | 9  | 0  |
| O54749 | Cytochrome P450 2J5 (EC 1.14.14.1) (CYP11J5) (Arachidonic acid epoxygenase) - Mus musculus (Mouse)                                                                                                                                      | 58032 | 29 | 34  | 7  | 6  |
| Q8CGV2 | Tryptophan 5-hydroxylase 2 (EC 1.14.16.4) (Tryptophan 5-monoxygenase 2) (Neuronal tryptophan hydroxylase) - Mus musculus (Mouse)                                                                                                        | 56623 | 29 | 0   | 11 | 0  |
| O54750 | Cytochrome P450 2J6 (EC 1.14.14.1) (CYP11J6) (Arachidonic acid epoxygenase) - Mus musculus (Mouse)                                                                                                                                      | 58068 | 29 | 34  | 4  | 4  |
| Q9QZ09 | Putative homeodomain transcription factor 1 - Mus musculus (Mouse)                                                                                                                                                                      | 87409 | 29 | 24  | 8  | 5  |
| Q9D365 | Signal peptidase complex subunit 3 (EC 3.4.-.-) (Microsomal signal peptidase 23 kDa subunit) (SPase 22 kDa subunit) (SPC22/23) - Mus musculus (Mouse)                                                                                   | 20191 | 29 | 0   | 3  | 0  |
| P09922 | Interferon-induced GTP-binding protein Mx1 (Influenza resistance protein) - Mus musculus (Mouse)                                                                                                                                        | 72620 | 29 | 0   | 5  | 0  |
| Q9R1P0 | Proteasome subunit alpha type 4 (EC 3.4.25.1) (Proteasome component C9) (Macropain subunit C9) (Multicatalytic endopeptidase complex subunit C9) (Proteasome subunit L) - Mus musculus (Mouse)                                          | 29737 | 29 | 151 | 14 | 17 |
| Q9Z1M8 | Protein Red (Protein RER) (IK factor) (Cytokine IK) - Mus musculus (Mouse)                                                                                                                                                              | 65591 | 29 | 23  | 10 | 8  |



|        |                                                                                                                                                                                                                 |        |    |    |    |    |
|--------|-----------------------------------------------------------------------------------------------------------------------------------------------------------------------------------------------------------------|--------|----|----|----|----|
| P39054 | Dynamin-2 (EC 3.6.5.5) (Dynamin UDNM) - Mus musculus (Mouse)                                                                                                                                                    | 98426  | 29 | 0  | 19 | 0  |
| P39053 | Dynamin-1 (EC 3.6.5.5) - Mus musculus (Mouse)                                                                                                                                                                   | 98140  | 29 | 0  | 13 | 0  |
| Q35973 | Period circadian protein homolog 1 (Circadian clock protein PERIOD 1) (Circadian pacemaker protein Rigi) (mPER1) - Mus musculus (Mouse)                                                                         | 137858 | 29 | 21 | 27 | 28 |
| Q9R0P4 | Small acidic protein (Sid 2057) - Mus musculus (Mouse)                                                                                                                                                          | 20091  | 29 | 0  | 12 | 0  |
| Q8K4E0 | Alstrom syndrome protein 1 homolog - Mus musculus (Mouse)                                                                                                                                                       | 362981 | 29 | 30 | 86 | 86 |
| Q569Z6 | Thyroid hormone receptor-associated protein 3 (Thyroid hormone receptor-associated protein complex 150 kDa component) (Trap150) - Mus musculus (Mouse)                                                          | 108171 | 29 | 48 | 21 | 16 |
| Q9Z0P5 | Twinfilin-2 (Twinfilin-1-like protein) (A6-related protein) (mA6RP) - Mus musculus (Mouse)                                                                                                                      | 39674  | 29 | 32 | 10 | 6  |
| Q923B1 | Lariat debranching enzyme (EC 3.1.-.-) - Mus musculus (Mouse)                                                                                                                                                   | 62934  | 28 | 29 | 15 | 19 |
| Q64676 | 2-hydroxyacylsphingosine 1-beta-galactosyltransferase precursor (EC 2.4.1.45) (UDP-galactose-ceramide galactosyltransferase) (Ceramide UDP-galactosyltransferase) (Cerebroside synthase) - Mus musculus (Mouse) | 61438  | 28 | 0  | 6  | 0  |
| Q9WTU3 | Sodium channel protein type 8 subunit alpha (Sodium channel protein type VIII subunit alpha) (Voltage-gated sodium channel subunit alpha Nav1.6) - Mus musculus (Mouse)                                         | 227276 | 28 | 19 | 20 | 11 |
| Q924W6 | Tripartite motif-containing protein 44 (Protein DIPB) (Protein Mc7) - Mus musculus (Mouse)                                                                                                                      | 38875  | 28 | 23 | 18 | 16 |
| Q61554 | Fibrillin-1 precursor - Mus musculus (Mouse)                                                                                                                                                                    | 332636 | 28 | 0  | 13 | 0  |
| Q9D8E6 | 60S ribosomal protein L4 (L1) - Mus musculus (Mouse)                                                                                                                                                            | 47409  | 28 | 0  | 13 | 0  |

|        |                                                                                                                                                                                                                                                           |        |    |    |    |    |
|--------|-----------------------------------------------------------------------------------------------------------------------------------------------------------------------------------------------------------------------------------------------------------|--------|----|----|----|----|
| Q8VHR5 | Transcriptional repressor p66 beta (p66/p68) (GATA zinc finger domain-containing protein 2B) - Mus musculus (Mouse)                                                                                                                                       | 65712  | 28 | 0  | 15 | 0  |
| Q9WTX2 | Interferon-inducible double stranded RNA-dependent protein kinase activator A (Protein kinase, interferon-inducible double stranded RNA-dependent activator) (Protein activator of the interferon-induced protein kinase) (PKR-associated protein X) (PKR | 34806  | 28 | 39 | 9  | 12 |
| Q6ZPK0 | PHD finger protein 21A (BRAAF35-HDAC complex protein BHC80) (mBHC80) (BHC80a) - Mus musculus (Mouse)                                                                                                                                                      | 73160  | 28 | 37 | 20 | 19 |
| Q8VEM1 | Goliath homolog precursor (RING finger protein 130) (G1-related zinc finger protein) - Mus musculus (Mouse)                                                                                                                                               | 47030  | 28 | 0  | 10 | 0  |
| Q02395 | Metal-response element-binding transcription factor 2 (Zinc-regulated factor 1) (ZiRF1) (Metal-response element DNA-binding protein M96) (Metal-regulatory transcription factor 2) (PCL2) - Mus musculus (Mouse)                                          | 68193  | 28 | 0  | 5  | 0  |
| Q9WUF3 | CASP8-associated protein 2 (FLICE-associated huge protein) - Mus musculus (Mouse)                                                                                                                                                                         | 221847 | 28 | 16 | 26 | 29 |
| Q99PJ1 | Protocadherin-15 precursor - Mus musculus (Mouse)                                                                                                                                                                                                         | 215653 | 28 | 0  | 19 | 0  |
| Q8R2X8 | Golgin 45 (Basic leucine zipper nuclear factor 1) - Mus musculus (Mouse)                                                                                                                                                                                  | 45855  | 28 | 22 | 13 | 16 |
| P61514 | 60S ribosomal protein L37a - Mus musculus (Mouse)                                                                                                                                                                                                         | 10497  | 28 | 0  | 3  | 0  |
| Q00519 | Xanthine dehydrogenase/oxidase [Includes: Xanthine dehydrogenase (EC 1.17.1.4) (XD); Xanthine oxidase (EC 1.17.3.2) (XO) (Xanthine oxidoreductase)] - Mus musculus (Mouse)                                                                                | 148534 | 28 | 0  | 15 | 0  |

|        |                                                                                                                                                                                                                                                          |        |    |    |    |    |
|--------|----------------------------------------------------------------------------------------------------------------------------------------------------------------------------------------------------------------------------------------------------------|--------|----|----|----|----|
| P11247 | Myeloperoxidase precursor (EC 1.11.1.7) (MPO) [Contains: Myeloperoxidase light chain; Myeloperoxidase heavy chain] - Mus musculus (Mouse)                                                                                                                | 81931  | 28 | 0  | 10 | 0  |
| Q9WVS8 | Mitogen-activated protein kinase 7 (EC 2.7.11.24) (Extracellular signal-regulated kinase 5) (ERK-5) (BMK1 kinase) - Mus musculus (Mouse)                                                                                                                 | 88134  | 28 | 0  | 7  | 0  |
| Q8BYK5 | Phosphatase and actin regulator 3 (Scapinin) (Scaffold-associated PP1-inhibiting protein) - Mus musculus (Mouse)                                                                                                                                         | 62842  | 28 | 0  | 12 | 0  |
| P49766 | Vascular endothelial growth factor B precursor (VEGF-B) (VEGF-related factor) (VRF) - Mus musculus (Mouse)                                                                                                                                               | 22356  | 28 | 0  | 3  | 0  |
| Q8BZN6 | Dedicator of cytokinesis protein 10 - Mus musculus (Mouse)                                                                                                                                                                                               | 248054 | 28 | 0  | 17 | 0  |
| P21300 | Aldose reductase-related protein 1 (EC 1.1.1.21) (AR) (Aldehyde reductase) (VAS deferens androgen-dependent protein) (MVDP) (Aldo-keto reductase family 1 member B7) - Mus musculus (Mouse)                                                              | 36137  | 28 | 0  | 6  | 0  |
| P45377 | Aldose reductase-related protein 2 (EC 1.1.1.21) (AR) (Aldehyde reductase) (Fibroblast growth factor-regulated protein) (FR-1 protein) - Mus musculus (Mouse)                                                                                            | 36440  | 28 | 0  | 7  | 0  |
| O35608 | Angiopoietin-2 precursor (ANG-2) - Mus musculus (Mouse)                                                                                                                                                                                                  | 56996  | 28 | 0  | 4  | 0  |
| Q62371 | Discoidin domain-containing receptor 2 precursor (EC 2.7.10.1) (Discoidin domain receptor 2) (Receptor protein-tyrosine kinase TKT) (Tyrosine-protein kinase TYRO 10) (Neurotrophic tyrosine kinase, receptor-related 3) (CD167b antigen) - Mus musculus | 97446  | 28 | 0  | 14 | 0  |
| P51637 | Caveolin-3 (M-caveolin) - Mus musculus (Mouse)                                                                                                                                                                                                           | 17860  | 28 | 0  | 4  | 0  |
| Q8VII8 | Mineralocorticoid receptor (MR) - Mus musculus (Mouse)                                                                                                                                                                                                   | 107805 | 28 | 22 | 18 | 22 |

|        |                                                                                                                                                                                                               |        |    |    |    |    |
|--------|---------------------------------------------------------------------------------------------------------------------------------------------------------------------------------------------------------------|--------|----|----|----|----|
| P62874 | Guanine nucleotide-binding protein G(I)/G(S)/G(T) subunit beta 1 (Transducin beta chain 1) - Mus musculus (Mouse)                                                                                             | 38151  | 28 | 0  | 6  | 0  |
| P26361 | Cystic fibrosis transmembrane conductance regulator (CFTR) (cAMP-dependent chloride channel) (ATP-binding cassette transporter sub-family C member 7) - Mus musculus (Mouse)                                  | 168733 | 28 | 0  | 14 | 0  |
| O35164 | Mast cell protease 9 precursor (EC 3.4.21.-) (MMCP-9) - Mus musculus (Mouse)                                                                                                                                  | 27034  | 28 | 0  | 10 | 0  |
| Q80ZX8 | Sperm-associated antigen 1 (Infertility-related sperm protein Spag-1) (TPR-containing protein involved in spermatogenesis) (TPIS) - Mus musculus (Mouse)                                                      | 101862 | 28 | 0  | 19 | 0  |
| Q61846 | Maternal embryonic leucine zipper kinase (EC 2.7.11.1) (Protein kinase PK38) (mPK38) - Mus musculus (Mouse)                                                                                                   | 73693  | 28 | 32 | 10 | 13 |
| P61358 | 60S ribosomal protein L27 - Mus musculus (Mouse)                                                                                                                                                              | 15788  | 28 | 0  | 5  | 0  |
| Q64512 | Tyrosine-protein phosphatase non-receptor type 13 (EC 3.1.3.48) (Protein tyrosine phosphatase PTP-BL) (Protein-tyrosine phosphatase RIP) (protein tyrosine phosphatase DPZPTP) (PTP36) - Mus musculus (Mouse) | 272048 | 28 | 27 | 26 | 21 |
| Q60862 | Origin recognition complex subunit 2 - Mus musculus (Mouse)                                                                                                                                                   | 65967  | 28 | 0  | 13 | 0  |
| P12658 | Calbindin (Vitamin D-dependent calcium-binding protein, avian-type) (Calbindin D28) (D-28K) (Spot 35 protein) (PCD-29) - Mus musculus (Mouse)                                                                 | 30203  | 28 | 0  | 5  | 0  |
| P43275 | Histone H1.1 (H1 VAR.3) (H1a) - Mus musculus (Mouse)                                                                                                                                                          | 21772  | 28 | 90 | 9  | 6  |
| P43276 | Histone H1.5 (H1 VAR.5) (H1b) - Mus musculus (Mouse)                                                                                                                                                          | 22562  | 28 | 0  | 4  | 0  |
| Q9QYB1 | Chloride intracellular channel protein 4 (mc3s5/mtCLIC) - Mus musculus (Mouse)                                                                                                                                | 28939  | 28 | 33 | 4  | 3  |
| Q99104 | Myosin-Va (Dilute myosin heavy chain, non-muscle) - Mus musculus (Mouse)                                                                                                                                      | 217112 | 28 | 34 | 35 | 31 |

|        |                                                                                                                                                                                    |        |    |    |    |    |
|--------|------------------------------------------------------------------------------------------------------------------------------------------------------------------------------------|--------|----|----|----|----|
| P48754 | Breast cancer type 1 susceptibility protein homolog - Mus musculus (Mouse)                                                                                                         | 201625 | 28 | 25 | 26 | 30 |
| Q99PV0 | Pre-mRNA-processing-splicing factor 8 (Splicing factor Prp8) - Mus musculus (Mouse)                                                                                                | 274738 | 28 | 29 | 51 | 35 |
| Q61216 | Double-strand break repair protein MRE11A (MRE11 homolog 1) (MRE11 meiotic recombination 11 homolog A) (MmMRE11A) - Mus musculus (Mouse)                                           | 80572  | 28 | 0  | 8  | 0  |
| Q9QZH3 | Peptidyl-prolyl cis-trans isomerase E (EC 5.2.1.8) (PPIase E) (Rotamase E) (Cyclophilin E) (Cyclophilin 33) - Mus musculus (Mouse)                                                 | 33713  | 28 | 35 | 10 | 9  |
| Q6ZQ93 | Ubiquitin carboxyl-terminal hydrolase 34 (EC 3.1.2.15) (Ubiquitin thioesterase 34) (Ubiquitin-specific-processing protease 34) (Deubiquitinating enzyme 34) - Mus musculus (Mouse) | 391121 | 28 | 0  | 40 | 0  |
| Q924W6 | Tripartite motif-containing protein 66 - Mus musculus (Mouse)                                                                                                                      | 135635 | 28 | 18 | 23 | 15 |
| Q6PFD5 | Disks large-associated protein 3 (DAP-3) (SAP90/PSD-95-associated protein 3) (SAPAP3) (PSD-95/SAP90-binding protein 3) - Mus musculus (Mouse)                                      | 106777 | 28 | 21 | 21 | 15 |
| Q8K0Q5 | Rho GTPase-activating protein 18 - Mus musculus (Mouse)                                                                                                                            | 75112  | 28 | 0  | 27 | 0  |
| Q5EBG6 | Heat-shock protein beta-6 (HspB6) - Mus musculus (Mouse)                                                                                                                           | 17567  | 27 | 22 | 4  | 2  |
| Q921Y0 | Mps one binder kinase activator-like 1B (Mob1 homolog 1B) - Mus musculus (Mouse)                                                                                                   | 25235  | 27 | 0  | 3  | 0  |
| P58681 | Toll-like receptor 7 precursor - Mus musculus (Mouse)                                                                                                                              | 123127 | 27 | 33 | 23 | 17 |
| Q91YK0 | Leucine-rich repeat-containing protein 49 (Tubulin polyglutamylase complex subunit 4) (PGs4) (p79) - Mus musculus (Mouse)                                                          | 79397  | 27 | 27 | 18 | 23 |

|        |                                                                                                                                                                              |        |    |     |    |    |
|--------|------------------------------------------------------------------------------------------------------------------------------------------------------------------------------|--------|----|-----|----|----|
| P70180 | Atrial natriuretic peptide clearance receptor precursor (ANP-C) (ANPRC) (NPR-C) (Atrial natriuretic peptide C-type receptor) (EF-2) - Mus musculus (Mouse)                   | 60146  | 27 | 0   | 5  | 0  |
| Q6ZWX6 | Eukaryotic translation initiation factor 2 subunit 1 (Eukaryotic translation initiation factor 2 subunit alpha) (eIF-2-alpha) (EIF-2alpha) (EIF-2A) - Mus musculus (Mouse)   | 36371  | 27 | 177 | 7  | 11 |
| Q9QZ39 | Alpha-N-acetylgalactosaminide alpha-2,6-sialyltransferase 1 (EC 2.4.99.3) (GalNAc alpha-2,6-sialyltransferase I) (ST6GalNAc I) (Sialyltransferase 7A) - Mus musculus (Mouse) | 60865  | 27 | 18  | 11 | 16 |
| P19253 | 60S ribosomal protein L13a (Transplantation antigen P198) (Tum-P198 antigen) - Mus musculus (Mouse)                                                                          | 23563  | 27 | 65  | 9  | 10 |
| Q8K1F9 | Lactase-like protein precursor (Klotho/lactase-phlorizin hydrolase-related protein) - Mus musculus (Mouse)                                                                   | 65240  | 27 | 21  | 24 | 18 |
| Q80TP3 | Ubiquitin-protein ligase EDD1 (EC 6.3.2.-) (Hyperplastic discs protein homolog) - Mus musculus (Mouse)                                                                       | 311352 | 27 | 17  | 43 | 29 |
| Q8C7X2 | Uncharacterized protein KIAA0090 precursor - Mus musculus (Mouse)                                                                                                            | 111934 | 27 | 0   | 9  | 0  |
| P22561 | Wilms~ tumor protein homolog - Mus musculus (Mouse)                                                                                                                          | 50127  | 27 | 0   | 4  | 0  |
| Q99JI6 | Ras-related protein Rap-1b precursor (GTP-binding protein smg p21B) - Mus musculus (Mouse)                                                                                   | 21040  | 27 | 0   | 7  | 0  |
| Q9R117 | Non-receptor tyrosine-protein kinase TYK2 (EC 2.7.10.2) - Mus musculus (Mouse)                                                                                               | 134942 | 27 | 30  | 15 | 26 |
| Q62504 | Msx2-interacting protein (SPEN homolog) (SMART/HDAC1-associated repressor protein) - Mus musculus (Mouse)                                                                    | 399881 | 27 | 18  | 72 | 75 |
| Q9R190 | Metastasis-associated protein MTA2 (Metastasis-associated 1-like 1) - Mus musculus (Mouse)                                                                                   | 75724  | 27 | 26  | 9  | 9  |

|        |                                                                                                                                                                                                                                          |        |    |    |    |   |
|--------|------------------------------------------------------------------------------------------------------------------------------------------------------------------------------------------------------------------------------------------|--------|----|----|----|---|
| P62192 | 26S protease regulatory subunit 4 (P26s4) (Proteasome 26S subunit ATPase 1) - Mus musculus (Mouse)                                                                                                                                       | 49325  | 27 | 0  | 23 | 0 |
| Q9Z2Z6 | Mitochondrial carnitine/acylcarnitine carrier protein (Carnitine/acylcarnitine translocase) (CAC) (mCAC) (Solute carrier family 25 member 20) - Mus musculus (Mouse)                                                                     | 33347  | 27 | 0  | 3  | 0 |
| Q8VEE0 | Ribulose-phosphate 3-epimerase (EC 5.1.3.1) (Ribulose-5-phosphate-epimerase) - Mus musculus (Mouse)                                                                                                                                      | 25156  | 27 | 17 | 5  | 2 |
| Q8CH18 | Cell division cycle and apoptosis regulator protein 1 (Cell cycle and apoptosis regulatory protein 1) (CARP-1) - Mus musculus (Mouse)                                                                                                    | 132663 | 27 | 0  | 9  | 0 |
| Q9QYR9 | Acyl-coenzyme A thioesterase 2, mitochondrial precursor (EC 3.1.2.2) (Acyl-CoA thioesterase 2) (Acyl coenzyme A thioester hydrolase) (Very-long-chain acyl-CoA thioesterase) (MTE-I) - Mus musculus (Mouse)                              | 49849  | 27 | 0  | 8  | 0 |
| O55137 | Acyl-coenzyme A thioesterase 1 (EC 3.1.2.2) (Acyl-CoA thioesterase 1) (Inducible cytosolic acyl-coenzyme A thioester hydrolase) (Long chain acyl-CoA thioester hydrolase) (Long chain acyl-CoA hydrolase) (CTE-I) - Mus musculus (Mouse) | 46335  | 27 | 0  | 6  | 0 |
| Q8BWN8 | Acyl-coenzyme A thioesterase 4 (EC 3.1.2.2) (Acyl-CoA thioesterase 4) (Peroxisomal acyl coenzyme A thioester hydrolase Ib) (Peroxisomal long-chain acyl-coA thioesterase Ib) (PTE-Ib) (PTE-2b) - Mus musculus (Mouse)                    | 46793  | 27 | 0  | 3  | 0 |
| Q6Q2Z6 | Acyl-coenzyme A thioesterase 5 (EC 3.1.2.2) (Acyl-CoA thioesterase 5) (Peroxisomal acyl-coenzyme A thioester hydrolase Ic) (Peroxisomal acyl-CoA thioesterase Ic) - Mus musculus (Mouse)                                                 | 46661  | 27 | 0  | 5  | 0 |

|        |                                                                                                                                                                                                                                                    |        |    |    |    |    |
|--------|----------------------------------------------------------------------------------------------------------------------------------------------------------------------------------------------------------------------------------------------------|--------|----|----|----|----|
| Q6A4J8 | Ubiquitin carboxyl-terminal hydrolase 7 (EC 3.1.2.15) (Ubiquitin thioesterase 7) (Ubiquitin-specific-processing protease 7) (Deubiquitinating enzyme 7) (Herpesvirus-associated ubiquitin-specific protease) (mHAUSP) - Mus musculus (Mouse)       | 129477 | 27 | 18 | 14 | 16 |
| Q8K389 | CDK5 regulatory subunit-associated protein 2 (CDK5 activator-binding protein C48) - Mus musculus (Mouse)                                                                                                                                           | 207072 | 27 | 0  | 23 | 0  |
| O88866 | Hormonally up-regulated neu tumor-associated kinase (EC 2.7.11.1) (Serine/threonine-protein kinase MAK-V) - Mus musculus (Mouse)                                                                                                                   | 80294  | 27 | 21 | 14 | 12 |
| Q61466 | SWI/SNF-related matrix-associated actin-dependent regulator of chromatin subfamily D member 1 (SWI/SNF complex 60 kDa subunit) (60 kDa BRG-1/Brm-associated factor subunit A) (BRG1-associated factor 60A) (D15KZ1 protein) - Mus musculus (Mouse) | 55179  | 27 | 29 | 13 | 16 |
| Q09PK2 | Retroviral-like aspartic protease 1 precursor (EC 3.4.23.-) (Skin-specific retroviral-like aspartic protease) (Skin aspartic protease) (SASPase) (TPA-inducible aspartic proteinase-like protein) - Mus musculus (Mouse)                           | 37436  | 27 | 29 | 15 | 12 |
| Q3UZW7 | Protein FAM86A - Mus musculus (Mouse)                                                                                                                                                                                                              | 37430  | 26 | 0  | 11 | 0  |
| P70323 | T-box transcription factor TBX1 (T-box protein 1) (Testis-specific T-box protein) - Mus musculus (Mouse)                                                                                                                                           | 51807  | 26 | 0  | 3  | 0  |
| Q3TGF2 | Protein FAM107B - Mus musculus (Mouse)                                                                                                                                                                                                             | 15562  | 26 | 33 | 6  | 12 |
| Q8BVQ5 | Protein phosphatase methylesterase 1 (EC 3.1.1.-) (PME-1) - Mus musculus (Mouse)                                                                                                                                                                   | 42628  | 26 | 0  | 15 | 0  |
| Q99N50 | Synaptotagmin-like protein 2 (Exophilin-4) - Mus musculus (Mouse)                                                                                                                                                                                  | 107196 | 26 | 77 | 10 | 18 |



|        |                                                                                                                                                                                                                                                            |        |    |     |    |    |
|--------|------------------------------------------------------------------------------------------------------------------------------------------------------------------------------------------------------------------------------------------------------------|--------|----|-----|----|----|
| P59016 | Vacuolar protein sorting-associated protein 33B - Mus musculus (Mouse)                                                                                                                                                                                     | 71166  | 26 | 0   | 4  | 0  |
| Q7TSY8 | Shugoshin-like 2 - Mus musculus (Mouse)                                                                                                                                                                                                                    | 131850 | 26 | 0   | 22 | 0  |
| P08030 | Adenine phosphoribosyltransferase (EC 2.4.2.7) (APRT) - Mus musculus (Mouse)                                                                                                                                                                               | 19895  | 26 | 0   | 5  | 0  |
| Q8VCZ3 | THAP domain-containing protein 7 - Mus musculus (Mouse)                                                                                                                                                                                                    | 35199  | 26 | 18  | 6  | 6  |
| Q5XPT3 | Glycosyltransferase-like protein LARGE2 (EC 2.4.-.-) (Glycosyltransferase-like 1B) - Mus musculus (Mouse)                                                                                                                                                  | 79977  | 26 | 0   | 6  | 0  |
| P56399 | Ubiquitin carboxyl-terminal hydrolase 5 (EC 3.1.2.15) (Ubiquitin thioesterase 5) (Ubiquitin-specific-processing protease 5) (Deubiquitinating enzyme 5) (Isopeptidase T) - Mus musculus (Mouse)                                                            | 96685  | 26 | 71  | 19 | 9  |
| Q08024 | Core-binding factor subunit beta (CBF-beta) (Polyomavirus enhancer-binding protein 2 beta subunit) (PEBP2-beta) (PEA2-beta) (SL3-3 enhancer factor 1 beta subunit) (SL3/AKV core-binding factor beta subunit) - Mus musculus (Mouse)                       | 22245  | 26 | 188 | 2  | 4  |
| Q9QWY8 | 130 kDa phosphatidylinositol 4,5-bisphosphate-dependent ARF1 GTPase-activating protein (PIP2-dependent ARF1 GAP) (ADP-ribosylation factor-directed GTPase-activating protein 1) (ARF GTPase-activating protein 1) (Development and differentiation-enhanci | 128286 | 26 | 23  | 14 | 16 |
| Q91Y97 | Fructose-bisphosphate aldolase B (EC 4.1.2.13) (Liver-type aldolase) (Aldolase 2) - Mus musculus (Mouse)                                                                                                                                                   | 39938  | 26 | 51  | 5  | 11 |
| O08677 | Kininogen-1 precursor [Contains: Kininogen-1 heavy chain; Bradykinin; Kininogen-1 light chain] - Mus musculus (Mouse)                                                                                                                                      | 74140  | 26 | 21  | 5  | 7  |
| Q8C761 | WD repeat protein 60 - Mus musculus (Mouse)                                                                                                                                                                                                                | 115939 | 26 | 0   | 7  | 0  |

|        |                                                                                                                                                                      |        |    |    |    |    |
|--------|----------------------------------------------------------------------------------------------------------------------------------------------------------------------|--------|----|----|----|----|
| Q60695 | Ral guanine nucleotide dissociation stimulator-like 1 (RalGDS-like 1) - Mus musculus (Mouse)                                                                         | 87205  | 26 | 15 | 4  | 6  |
| Q80TH2 | Protein LAP2 (ErbB2-interacting protein) (Erbin) (Densin-180-like protein) - Mus musculus (Mouse)                                                                    | 158047 | 26 | 0  | 9  | 0  |
| Q60879 | Olfactory receptor 3 (Olfactory receptor 136-14) (Odorant receptor K10) - Mus musculus (Mouse)                                                                       | 35515  | 26 | 0  | 2  | 0  |
| P17047 | Lysosome-associated membrane glycoprotein 2 precursor (LAMP-2) (Lysosomal membrane glycoprotein type B) (LGP-B) (CD107b antigen) - Mus musculus (Mouse)              | 46131  | 26 | 29 | 8  | 11 |
| Q62407 | Striated muscle-specific serine/threonine protein kinase (EC 2.7.11.1) (Aortic preferentially expressed protein 1) (APEG-1) - Mus musculus (Mouse)                   | 356975 | 26 | 20 | 31 | 25 |
| Q3TNA1 | Xylulose kinase (EC 2.7.1.17) (Xylulokinase) - Mus musculus (Mouse)                                                                                                  | 60304  | 26 | 0  | 1  | 0  |
| P54869 | Hydroxymethylglutaryl-CoA synthase, mitochondrial precursor (EC 2.3.3.10) (HMG-CoA synthase) (3-hydroxy-3-methylglutaryl coenzyme A synthase) - Mus musculus (Mouse) | 57300  | 26 | 23 | 18 | 17 |
| Q60824 | Bullous pemphigoid antigen 1, isoforms 6/7 (BPA) (Hemidesmosomal plaque protein) (Dystonia musculorum protein) (Dystonin) (Fragments) - Mus musculus (Mouse)         | 193173 | 26 | 0  | 30 | 0  |
| Q99J99 | 3-mercaptopyruvate sulfurtransferase (EC 2.8.1.2) (MST) - Mus musculus (Mouse)                                                                                       | 33231  | 26 | 0  | 6  | 0  |
| Q8R322 | Nucleoporin GLE1 (GLE1-like protein) - Mus musculus (Mouse)                                                                                                          | 79981  | 26 | 0  | 10 | 0  |
| Q88207 | Collagen alpha-1(V) chain precursor - Mus musculus (Mouse)                                                                                                           | 184248 | 26 | 0  | 26 | 0  |

|        |                                                                                                                                                                                                      |        |    |    |     |    |
|--------|------------------------------------------------------------------------------------------------------------------------------------------------------------------------------------------------------|--------|----|----|-----|----|
| Q6P7W0 | Sentrin-specific protease 6 (EC 3.4.22.-) (Sentrin/SUMO-specific protease SENP6) (SUMO-1-specific protease 1) - Mus musculus (Mouse)                                                                 | 128669 | 26 | 0  | 11  | 0  |
| Q60677 | Integrin alpha-E precursor (Integrin alpha M290) (CD103 antigen) [Contains: Integrin alpha-E light chain; Integrin alpha-E heavy chain] - Mus musculus (Mouse)                                       | 130498 | 26 | 0  | 14  | 0  |
| Q8C9S8 | Cysteine protease ATG4A (EC 3.4.22.-) (Autophagy-related protein 4 homolog A) (Autophagin-2) (Autophagy-related cysteine endopeptidase 2) (AUT-like 2 cysteine endopeptidase) - Mus musculus (Mouse) | 45807  | 26 | 21 | 6   | 4  |
| Q8BMA6 | Signal recognition particle 68 kDa protein (SRP68) - Mus musculus (Mouse)                                                                                                                            | 71092  | 26 | 15 | 27  | 13 |
| Q9D1G2 | Phosphomevalonate kinase (EC 2.7.4.2) (PMKase) - Mus musculus (Mouse)                                                                                                                                | 22187  | 26 | 0  | 6   | 0  |
| Q7TNP2 | Serine/threonine-protein phosphatase 2A 65 kDa regulatory subunit A beta isoform (PP2A, subunit A, PR65-beta isoform) (PP2A, subunit A, R1-beta isoform) - Mus musculus (Mouse)                      | 66592  | 26 | 22 | 9   | 9  |
| Q9QXZ0 | Microtubule-actin cross-linking factor 1 (Actin cross-linking family 7) - Mus musculus (Mouse)                                                                                                       | 611249 | 26 | 0  | 125 | 0  |
| Q9Z176 | Protein phosphatase 2A, 59 kDa regulatory subunit B (PP2A PR59) (PP2A B~~-PR59) - Mus musculus (Mouse)                                                                                               | 56298  | 26 | 0  | 15  | 0  |
| Q8R3C6 | Probable RNA-binding protein 19 (RNA-binding motif protein 19) - Mus musculus (Mouse)                                                                                                                | 106474 | 26 | 32 | 11  | 20 |
| Q9QYC1 | Pecanex-like protein 1 (Pecanex homolog) - Mus musculus (Mouse)                                                                                                                                      | 260779 | 26 | 21 | 25  | 17 |

|        |                                                                                                                                                                                                                                                      |        |    |    |     |     |
|--------|------------------------------------------------------------------------------------------------------------------------------------------------------------------------------------------------------------------------------------------------------|--------|----|----|-----|-----|
| Q9JM05 | E3 SUMO-protein ligase PIAS4 (Protein inhibitor of activated STAT protein 4) (Protein inhibitor of activated STAT protein gamma) (PIAS-gamma) (PIASy) - Mus musculus (Mouse)                                                                         | 56504  | 26 | 29 | 162 | 165 |
| Q07104 | Growth/differentiation factor 3 precursor (GDF-3) (VG-1-related protein 2) - Mus musculus (Mouse)                                                                                                                                                    | 42128  | 26 | 0  | 11  | 0   |
| Q99MS8 | Tubulin polyglutamylase complex subunit 1 (PGs1) (p32) - Mus musculus (Mouse)                                                                                                                                                                        | 32833  | 26 | 20 | 2   | 4   |
| P42337 | Phosphatidylinositol-4,5-bisphosphate 3-kinase catalytic subunit alpha isoform (EC 2.7.1.153) (PI3-kinase p110 subunit alpha) (PtdIns-3-kinase p110) (PI3K) - Mus musculus (Mouse)                                                                   | 126141 | 26 | 0  | 13  | 0   |
| Q9Z0W3 | Nuclear pore complex protein Nup160 (Nucleoporin Nup160) (160 kDa nucleoporin) (Gene trap locus 1-13) (GTL-13) - Mus musculus (Mouse)                                                                                                                | 160126 | 26 | 0  | 14  | 0   |
| Q9R269 | Periplakin - Mus musculus (Mouse)                                                                                                                                                                                                                    | 204508 | 26 | 0  | 48  | 0   |
| Q3THS6 | S-adenosylmethionine synthetase isoform type-2 (EC 2.5.1.6) (Methionine adenosyltransferase 2) (AdoMet synthetase 2) - Mus musculus (Mouse)                                                                                                          | 44003  | 26 | 42 | 11  | 12  |
| Q8BR65 | Sin3 histone deacetylase corepressor complex component SDS3 (Suppressor of defective silencing 3 protein homolog) - Mus musculus (Mouse)                                                                                                             | 38197  | 26 | 0  | 7   | 0   |
| P48455 | Serine/threonine-protein phosphatase 2B catalytic subunit gamma isoform (EC 3.1.3.16) (Calmodulin-dependent calcineurin A subunit gamma isoform) (Calcineurin, testis-specific catalytic subunit) (CAM-PRP catalytic subunit) - Mus musculus (Mouse) | 59403  | 26 | 0  | 6   | 0   |

|        |                                                                                                                                            |        |    |    |    |    |
|--------|--------------------------------------------------------------------------------------------------------------------------------------------|--------|----|----|----|----|
| P97287 | Induced myeloid leukemia cell differentiation protein Mcl-1 homolog (Bcl-2-related protein EAT/mcl1) - Mus musculus (Mouse)                | 35309  | 26 | 30 | 7  | 4  |
| Q9QX66 | Zinc-finger protein neuro-d4 (D4, zinc and double PHD fingers family 1) - Mus musculus (Mouse)                                             | 45636  | 26 | 0  | 5  | 0  |
| Q99JI4 | 26S proteasome non-ATPase regulatory subunit 6 (26S proteasome regulatory subunit S10) (p42A) - Mus musculus (Mouse)                       | 45792  | 26 | 0  | 2  | 0  |
| Q8BV13 | COP9 signalosome complex subunit 7b (Signalosome subunit 7b) (SGN7b) (JAB1-containing signalosome subunit 7b) - Mus musculus (Mouse)       | 29956  | 26 | 0  | 3  | 0  |
| Q8R310 | Transmembrane and coiled-coil domains protein 3 - Mus musculus (Mouse)                                                                     | 50541  | 26 | 18 | 21 | 10 |
| Q9JKY5 | Huntingtin-interacting protein 1-related protein (Hip1-related) - Mus musculus (Mouse)                                                     | 120039 | 26 | 0  | 20 | 0  |
| Q61789 | Laminin subunit alpha-3 precursor (Nicein subunit alpha) - Mus musculus (Mouse)                                                            | 374640 | 26 | 26 | 37 | 50 |
| Q8CCG1 | Uncharacterized protein C14orf140 homolog - Mus musculus (Mouse)                                                                           | 60175  | 26 | 0  | 13 | 0  |
| Q9CQY5 | Implantation-associated protein precursor (IAP) (Magnesium transporter protein 1) (MagT1) - Mus musculus (Mouse)                           | 38287  | 26 | 22 | 8  | 12 |
| P14429 | H-2 class I histocompatibility antigen, Q7 alpha chain precursor (QA-2 antigen) - Mus musculus (Mouse)                                     | 38128  | 25 | 0  | 3  | 0  |
| P35175 | Stefin-3 - Mus musculus (Mouse)                                                                                                            | 11056  | 25 | 27 | 6  | 10 |
| Q99N57 | RAF proto-oncogene serine/threonine-protein kinase (EC 2.7.11.1) (Raf-1) (C-RAF) (cRaf) - Mus musculus (Mouse)                             | 73669  | 25 | 0  | 8  | 0  |
| Q03172 | Zinc finger protein 40 (Transcription factor alphaA-CRYBP1) (Alpha A-crystallin-binding protein I) (Alpha A-CRYBP1) - Mus musculus (Mouse) | 291073 | 25 | 24 | 21 | 15 |

|        |                                                                                                                                                                                                                                                       |        |    |     |    |    |
|--------|-------------------------------------------------------------------------------------------------------------------------------------------------------------------------------------------------------------------------------------------------------|--------|----|-----|----|----|
| P97496 | SWI/SNF-related matrix-associated actin-dependent regulator of chromatin subfamily C member 1 (SWI/SNF complex 155 kDa subunit) (BRG1-associated factor 155) (SWI3-related protein) - Mus musculus (Mouse)                                            | 123326 | 25 | 0   | 14 | 0  |
| Q5SXJ3 | Fanconi anemia group J protein homolog (EC 3.6.1.-) (ATP-dependent RNA helicase BRIP1) (Protein FACJ) (BRCA1-interacting protein C-terminal helicase 1) (BRCA1-interacting protein 1) (BRCA1-associated C-terminal helicase 1) - Mus musculus (Mouse) | 133502 | 25 | 18  | 13 | 17 |
| Q9D5Y0 | Uncharacterized protein C7orf31 homolog (Protein TISP74) - Mus musculus (Mouse)                                                                                                                                                                       | 68416  | 25 | 0   | 11 | 0  |
| Q9EPL8 | Importin-7 (Imp7) (Ran-binding protein 7) (RanBP7) - Mus musculus (Mouse)                                                                                                                                                                             | 120721 | 25 | 121 | 9  | 12 |
| Q62312 | TGF-beta receptor type-2 precursor (EC 2.7.11.30) (TGF-beta receptor type II) (TGFR-2) (TGF-beta type II receptor) (Transforming growth factor-beta receptor type II) (TbetaR-II) - Mus musculus (Mouse)                                              | 68561  | 25 | 0   | 10 | 0  |
| Q8BX70 | Vacuolar protein sorting-associated protein 13C - Mus musculus (Mouse)                                                                                                                                                                                | 422162 | 25 | 17  | 53 | 38 |
| Q91VE3 | Kallikrein-7 precursor (EC 3.4.21.117) (Stratum corneum chymotryptic enzyme) (Thymopsin) (Serine protease 6) - Mus musculus (Mouse)                                                                                                                   | 27924  | 25 | 24  | 9  | 23 |
| Q8BZM0 | Kelch-like protein 12 (CUL3-interacting protein 1) - Mus musculus (Mouse)                                                                                                                                                                             | 64175  | 25 | 0   | 4  | 0  |
| Q8BKJ9 | NAD-dependent deacetylase sirtuin-7 (EC 3.5.1.-) (SIR2-like protein 7) - Mus musculus (Mouse)                                                                                                                                                         | 45745  | 25 | 0   | 4  | 0  |

|        |                                                                                                                                                                                                                           |        |    |    |    |    |
|--------|---------------------------------------------------------------------------------------------------------------------------------------------------------------------------------------------------------------------------|--------|----|----|----|----|
| Q3TB82 | Pleckstrin homology domain-containing family F member 1 (PH domain-containing family F member 1) (Lysosome-associated apoptosis-inducing protein containing PH and FYVE domains) - Mus musculus (Mouse)                   | 31822  | 25 | 0  | 10 | 0  |
| Q922G7 | Tektin-2 (Testicular tektin) (Tektin-t) - Mus musculus (Mouse)                                                                                                                                                            | 50736  | 25 | 26 | 9  | 8  |
| P51436 | D(4) dopamine receptor (Dopamine D4 receptor) (D(2C) dopamine receptor) - Mus musculus (Mouse)                                                                                                                            | 42429  | 25 | 0  | 4  | 0  |
| Q9R244 | Short transient receptor potential channel 2 (TrpC2) (mTrp2) - Mus musculus (Mouse)                                                                                                                                       | 131640 | 25 | 55 | 45 | 92 |
| Q61074 | Protein phosphatase 2C isoform gamma (EC 3.1.3.16) (PP2C-gamma) (Protein phosphatase magnesium-dependent 1 gamma) (Protein phosphatase 1C) (Fibroblast growth factor-inducible protein 13) (FIN13) - Mus musculus (Mouse) | 59376  | 25 | 0  | 4  | 0  |
| P26339 | Chromogranin A precursor (CgA) [Contains: Pancreastatin; Beta-granin; WE-14] - Mus musculus (Mouse)                                                                                                                       | 51929  | 25 | 0  | 3  | 0  |
| Q6DFV7 | Nuclear receptor coactivator 7 - Mus musculus (Mouse)                                                                                                                                                                     | 106918 | 25 | 16 | 11 | 9  |
| P53351 | Serine/threonine-protein kinase PLK2 (EC 2.7.11.21) (Polo-like kinase 1) (PLK-2) (Serine/threonine-protein kinase SNK) (Serum-inducible kinase) - Mus musculus (Mouse)                                                    | 78845  | 25 | 0  | 16 | 0  |
| Q9CQI9 | Thyroid hormone receptor-associated protein 6 (Thyroid hormone receptor-associated protein complex 25 kDa component) (Trap25) - Mus musculus (Mouse)                                                                      | 20516  | 25 | 0  | 2  | 0  |

|        |                                                                                                                                                                                                            |        |    |    |    |    |
|--------|------------------------------------------------------------------------------------------------------------------------------------------------------------------------------------------------------------|--------|----|----|----|----|
| Q9QZS6 | Heparan sulfate glucosamine 3-O-sulfotransferase 3B1 (EC 2.8.2.30) (Heparan sulfate D-glucosaminyl 3-O-sulfotransferase 3B1) (Heparan sulfate 3-O-sulfotransferase 3B1) (m3-OST-3B) - Mus musculus (Mouse) | 43641  | 25 | 0  | 8  | 0  |
| Q8BGX3 | Leucine-rich repeat and transmembrane domain-containing protein 2 precursor - Mus musculus (Mouse)                                                                                                         | 41867  | 25 | 0  | 4  | 0  |
| Q80TB8 | Probable oxidoreductase KIAA1576 (EC 1.-.-.-) - Mus musculus (Mouse)                                                                                                                                       | 46130  | 25 | 14 | 25 | 21 |
| Q8CGF6 | WD repeat protein 47 - Mus musculus (Mouse)                                                                                                                                                                | 103826 | 25 | 0  | 15 | 0  |
| O70194 | Eukaryotic translation initiation factor 3 subunit 7 (eIF-3 zeta) (eIF3 p66) (eIF3d) - Mus musculus (Mouse)                                                                                                | 64202  | 25 | 0  | 4  | 0  |
| Q9QZS3 | Protein numb homolog (m-Numb) (m-Nb) - Mus musculus (Mouse)                                                                                                                                                | 71396  | 25 | 0  | 7  | 0  |
| Q8K363 | ATP-dependent RNA helicase DDX18 (EC 3.6.1.-) (DEAD box protein 18) - Mus musculus (Mouse)                                                                                                                 | 74476  | 25 | 0  | 13 | 0  |
| Q9EQC4 | Elongation of very long chain fatty acids protein 4 - Mus musculus (Mouse)                                                                                                                                 | 36668  | 25 | 18 | 5  | 6  |
| Q9CQI6 | Coactosin-like protein - Mus musculus (Mouse)                                                                                                                                                              | 16048  | 25 | 0  | 7  | 0  |
| Q7TPM1 | Uncharacterized protein KIAA0515 - Mus musculus (Mouse)                                                                                                                                                    | 161270 | 25 | 0  | 18 | 0  |
| P10166 | L-myc-1 proto-oncogene protein - Mus musculus (Mouse)                                                                                                                                                      | 41336  | 25 | 15 | 8  | 3  |
| P52927 | High mobility group protein HMGI-C (High mobility group AT-hook protein 2) - Mus musculus (Mouse)                                                                                                          | 11869  | 25 | 0  | 3  | 0  |
| Q569Z5 | Probable ATP-dependent RNA helicase DDX46 (EC 3.6.1.-) (DEAD box protein 46) - Mus musculus (Mouse)                                                                                                        | 117889 | 25 | 17 | 21 | 17 |
| Q8R4U0 | Stabilin-2 precursor [Contains: Short form stabilin-2] - Mus musculus (Mouse)                                                                                                                              | 288924 | 25 | 43 | 12 | 10 |



|        |                                                                                                                                                                                                                                                          |        |    |    |    |    |
|--------|----------------------------------------------------------------------------------------------------------------------------------------------------------------------------------------------------------------------------------------------------------|--------|----|----|----|----|
| Q54988 | STE20-like serine/threonine-protein kinase (EC 2.7.11.1) (STE20-like kinase) (STE20-related serine/threonine-protein kinase) (STE20-related kinase) (mSLK) (Serine/threonine-protein kinase 2) (STE20-related kinase SMAK) (Etk4) - Mus musculus (Mouse) | 142055 | 25 | 0  | 26 | 0  |
| Q8K4L3 | Supervillin (Archvillin) (p205/p250) - Mus musculus (Mouse)                                                                                                                                                                                              | 244551 | 25 | 22 | 18 | 12 |
| P53762 | Aryl hydrocarbon receptor nuclear translocator (ARNT protein) (Dioxin receptor, nuclear translocator) (Hypoxia-inducible factor 1 beta) (HIF-1 beta) - Mus musculus (Mouse)                                                                              | 87778  | 25 | 22 | 7  | 4  |
| Q9WV07 | Epidermis-type lipoxygenase 3 (EC 1.13.11.-) (e-LOX-3) - Mus musculus (Mouse)                                                                                                                                                                            | 82066  | 25 | 22 | 9  | 6  |
| P63321 | Ras-related protein Ral-A - Mus musculus (Mouse)                                                                                                                                                                                                         | 23709  | 25 | 22 | 30 | 39 |
| Q8BGT5 | Alanine aminotransferase 2 (EC 2.6.1.2) (ALT2) (Glutamic--pyruvic transaminase 2) (GPT 2) (Glutamic--alanine transaminase 2) - Mus musculus (Mouse)                                                                                                      | 58705  | 25 | 20 | 15 | 24 |
| Q9DBG5 | Mannose-6-phosphate receptor-binding protein 1 (Cargo selection protein TIP47) - Mus musculus (Mouse)                                                                                                                                                    | 47347  | 25 | 22 | 8  | 6  |
| Q8QZR5 | Alanine aminotransferase 1 (EC 2.6.1.2) (ALT1) (Glutamic--pyruvic transaminase 1) (GPT 1) (Glutamic--alanine transaminase 1) - Mus musculus (Mouse)                                                                                                      | 55905  | 25 | 20 | 15 | 26 |
| Q921P9 | Transcription elongation factor A protein-like 1 (TCEA-like protein 1) (Transcription elongation factor S-II protein-like 1) - Mus musculus (Mouse)                                                                                                      | 19471  | 25 | 22 | 6  | 3  |
| Q60855 | Receptor-interacting serine/threonine-protein kinase 1 (EC 2.7.11.1) (Serine/threonine-protein kinase RIP) (Cell death protein RIP) (Receptor-interacting protein) - Mus musculus (Mouse)                                                                | 75434  | 25 | 0  | 12 | 0  |

|        |                                                                                                                                                                                                                                                              |        |    |    |    |    |
|--------|--------------------------------------------------------------------------------------------------------------------------------------------------------------------------------------------------------------------------------------------------------------|--------|----|----|----|----|
| Q8BM75 | AT-rich interactive domain-containing protein 5B (ARID domain-containing protein 5B) (MRF1-like) (Modulator recognition factor protein 2) (MRF-2) (Developmentally and sexually retarded with transient immune abnormalities protein) - Mus musculus (Mouse) | 132869 | 25 | 0  | 12 | 0  |
| Q8BG95 | Protein phosphatase 1 regulatory subunit 12B (Myosin phosphatase-targeting subunit 2) - Mus musculus (Mouse)                                                                                                                                                 | 109326 | 25 | 24 | 25 | 22 |
| Q8R429 | Sarcoplasmic/endoplasmic reticulum calcium ATPase 1 (EC 3.6.3.8) (Calcium pump 1) (SERCA1) (SR Ca(2+)-ATPase 1) (Calcium-transporting ATPase sarcoplasmic reticulum type, fast twitch skeletal muscle isoform) (Endoplasmic reticulum class 1/2 Ca(2+) AT    | 110723 | 25 | 17 | 17 | 14 |
| Q2VPD4 | Aryl hydrocarbon receptor nuclear translocator-like protein 2 (Brain and muscle ARNT-like 2) - Mus musculus (Mouse)                                                                                                                                          | 65042  | 25 | 0  | 8  | 0  |
| Q6P4S8 | Integrator complex subunit 1 (Int1) - Mus musculus (Mouse)                                                                                                                                                                                                   | 239047 | 25 | 33 | 26 | 27 |
| Q99K82 | Spermine oxidase (EC 1.5.3.-) (Polyamine oxidase 1) (PAO-1) (PAOh1) - Mus musculus (Mouse)                                                                                                                                                                   | 62612  | 25 | 0  | 3  | 0  |
| Q8R0H9 | ADP-ribosylation factor-binding protein GGA1 (Golgi-localized, gamma ear-containing, ARF-binding protein 1) (Gamma-adaptin-related protein 1) - Mus musculus (Mouse)                                                                                         | 70270  | 25 | 0  | 8  | 0  |
| P30545 | Alpha-2B adrenergic receptor (Alpha-2B adrenoceptor) (Alpha-2B adrenoceptor) - Mus musculus (Mouse)                                                                                                                                                          | 50881  | 25 | 0  | 5  | 0  |
| Q9EQP6 | Arrestin-C (Cone arrestin) (cArr) (Retinal cone arrestin-3) - Mus musculus (Mouse)                                                                                                                                                                           | 42180  | 25 | 0  | 3  | 0  |
| Q8BIJ7 | RUN and FYVE domain-containing protein 1 (Rab4-interacting protein) - Mus musculus (Mouse)                                                                                                                                                                   | 81466  | 25 | 0  | 21 | 0  |
| P11531 | Dystrophin - Mus musculus (Mouse)                                                                                                                                                                                                                            | 427662 | 25 | 16 | 66 | 55 |

|        |                                                                                                                                                                  |        |    |    |    |    |
|--------|------------------------------------------------------------------------------------------------------------------------------------------------------------------|--------|----|----|----|----|
| Q9EQ43 | Vomeroneasal type-1 receptor B10 - Mus musculus (Mouse)                                                                                                          | 35773  | 25 | 0  | 3  | 0  |
| Q9D5V2 | Kelch-like protein 10 - Mus musculus (Mouse)                                                                                                                     | 69958  | 25 | 0  | 8  | 0  |
| P82343 | N-acylglucosamine 2-epimerase (EC 5.1.3.8) (GlcNAc 2-epimerase) (N-acetyl-D-glucosamine 2-epimerase) (AGE) (Renin-binding protein) (RnBP) - Mus musculus (Mouse) | 49048  | 24 | 16 | 18 | 9  |
| Q6ZWM4 | U6 snRNA-associated Sm-like protein LSm8 - Mus musculus (Mouse)                                                                                                  | 10396  | 24 | 0  | 2  | 0  |
| Q61881 | DNA replication licensing factor MCM7 (CDC47 homolog) - Mus musculus (Mouse)                                                                                     | 81787  | 24 | 18 | 10 | 6  |
| Q9EQC5 | N-terminal kinase-like protein (SCY1-like protein 1) (105 kDa kinase-like protein) (Mitosis-associated kinase-like protein NTKL) - Mus musculus (Mouse)          | 89731  | 24 | 0  | 5  | 0  |
| Q4U2R1 | HECT domain and RCC1-like domain-containing protein 2 - Mus musculus (Mouse)                                                                                     | 533983 | 24 | 24 | 45 | 49 |
| Q9DCD2 | XPA-binding protein 2 - Mus musculus (Mouse)                                                                                                                     | 100723 | 24 | 0  | 12 | 0  |
| Q92111 | Serotransferrin precursor (Transferrin) (Siderophilin) (Beta-1-metal-binding globulin) - Mus musculus (Mouse)                                                    | 78841  | 24 | 19 | 7  | 8  |
| O55142 | 60S ribosomal protein L35a - Mus musculus (Mouse)                                                                                                                | 12660  | 24 | 50 | 4  | 6  |
| O54834 | Rho GTPase-activating protein 6 (Rho-type GTPase-activating protein RhoGAPX-1) - Mus musculus (Mouse)                                                            | 109518 | 24 | 0  | 6  | 0  |
| Q61329 | Alpha-fetoprotein enhancer-binding protein (AT motif-binding factor) (AT-binding transcription factor 1) - Mus musculus (Mouse)                                  | 410990 | 24 | 16 | 30 | 30 |
| P33174 | Chromosome-associated kinesin KIF4A (Chromokinesin) - Mus musculus (Mouse)                                                                                       | 141061 | 24 | 22 | 15 | 12 |
| Q80W37 | Snurportin-1 (RNA U transporter 1) - Mus musculus (Mouse)                                                                                                        | 41462  | 24 | 0  | 1  | 0  |
| Q9EQD0 | Frizzled-5 precursor (Fz-5) (mFz5) - Mus musculus (Mouse)                                                                                                        | 65692  | 24 | 0  | 5  | 0  |

|        |                                                                                                                                                            |        |    |    |    |    |
|--------|------------------------------------------------------------------------------------------------------------------------------------------------------------|--------|----|----|----|----|
| Q62318 | Transcription intermediary factor 1-beta (TIF1-beta) (Tripartite motif-containing protein 28) (KRAB-A-interacting protein) (KRIP-1) - Mus musculus (Mouse) | 90558  | 24 | 84 | 10 | 20 |
| Q3UGF1 | WD repeat protein 19 - Mus musculus (Mouse)                                                                                                                | 153298 | 24 | 0  | 12 | 0  |
| O89110 | Caspase-8 precursor (EC 3.4.22.-) (CASP-8) [Contains: Caspase-8 subunit p18; Caspase-8 subunit p10] - Mus musculus (Mouse)                                 | 56291  | 24 | 0  | 4  | 0  |
| Q3UTQ8 | Cyclin-dependent kinase-like 5 (EC 2.7.11.22) - Mus musculus (Mouse)                                                                                       | 105767 | 24 | 16 | 11 | 15 |
| Q99JF8 | PC4 and SFRS1-interacting protein (Lens epithelium-derived growth factor) (mLEDGF) - Mus musculus (Mouse)                                                  | 59774  | 24 | 0  | 4  | 0  |
| Q8C5W3 | Tubulin-specific chaperone cofactor E-like protein (Leucine-rich repeat-containing protein 35) - Mus musculus (Mouse)                                      | 48515  | 24 | 0  | 38 | 0  |
| Q6PAL8 | Rab6-interacting protein 1 (Rab6IP1) - Mus musculus (Mouse)                                                                                                | 148213 | 24 | 0  | 17 | 0  |
| Q5SYD0 | Myosin-Ia - Mus musculus (Mouse)                                                                                                                           | 116806 | 24 | 0  | 24 | 0  |
| O08739 | AMP deaminase 3 (EC 3.5.4.6) (AMP deaminase isoform E) (AMP deaminase H-type) (Heart-type AMPD) - Mus musculus (Mouse)                                     | 89122  | 24 | 0  | 8  | 0  |
| Q8CGK7 | Guanine nucleotide-binding protein G(olf) subunit alpha (Adenylate cyclase-stimulating G alpha protein, olfactory type) - Mus musculus (Mouse)             | 44794  | 24 | 0  | 13 | 0  |
| Q5XJE5 | RNA polymerase-associated protein LEO1 - Mus musculus (Mouse)                                                                                              | 75710  | 24 | 0  | 12 | 0  |
| P50752 | Troponin T, cardiac muscle (TnTc) (Cardiac muscle troponin T) (cTnT) - Mus musculus (Mouse)                                                                | 35804  | 24 | 0  | 8  | 0  |
| Q35344 | Importin alpha-3 subunit (Karyopherin alpha-3 subunit) (Importin alpha Q2) - Mus musculus (Mouse)                                                          | 58193  | 24 | 28 | 10 | 6  |

|        |                                                                                                                                                                                         |        |    |    |    |    |
|--------|-----------------------------------------------------------------------------------------------------------------------------------------------------------------------------------------|--------|----|----|----|----|
| Q8CIV7 | Transcription factor Ovo-like 2 (mOvo2) (Zinc finger protein 339) (Zinc finger OVO2) (Zinc finger protein mOVO) - Mus musculus (Mouse)                                                  | 31479  | 24 | 0  | 18 | 0  |
| Q61147 | Ceruloplasmin precursor (EC 1.16.3.1) (Ferroxidase) - Mus musculus (Mouse)                                                                                                              | 121938 | 24 | 27 | 41 | 36 |
| Q62396 | Zinc finger protein 92 (Zfp-92) - Mus musculus (Mouse)                                                                                                                                  | 57010  | 24 | 0  | 5  | 0  |
| Q8CFB4 | Guanylate-binding protein 5 (GTP-binding protein 5) (Guanine nucleotide-binding protein 5) (GBP-5) (MuGBP-5) - Mus musculus (Mouse)                                                     | 67441  | 24 | 18 | 12 | 18 |
| O35468 | Protein Wnt-9b precursor (Wnt-15) (Wnt-14b) - Mus musculus (Mouse)                                                                                                                      | 40382  | 24 | 0  | 9  | 0  |
| Q811D2 | Ankyrin repeat domain-containing protein 26 - Mus musculus (Mouse)                                                                                                                      | 181790 | 24 | 16 | 29 | 33 |
| Q9ERI2 | Ras-related protein Rab-27A - Mus musculus (Mouse)                                                                                                                                      | 25286  | 24 | 0  | 5  | 0  |
| Q8CFQ3 | Intron-binding protein aquarius - Mus musculus (Mouse)                                                                                                                                  | 171440 | 24 | 0  | 14 | 0  |
| P27931 | Interleukin-1 receptor type II precursor (IL-1R-2) (IL-1R-beta) (CD121b antigen) - Mus musculus (Mouse)                                                                                 | 46130  | 24 | 24 | 8  | 3  |
| Q9CQL1 | Protein mago nashi homolog 1-related - Mus musculus (Mouse)                                                                                                                             | 17138  | 24 | 0  | 5  | 0  |
| Q02111 | Protein kinase C theta type (EC 2.7.11.13) (nPKC-theta) - Mus musculus (Mouse)                                                                                                          | 83059  | 24 | 19 | 15 | 7  |
| P20918 | Plasminogen precursor (EC 3.4.21.7) [Contains: Plasmin heavy chain A; Activation peptide; Angiostatin; Plasmin heavy chain A, short form; Plasmin light chain B] - Mus musculus (Mouse) | 93460  | 24 | 0  | 6  | 0  |
| Q922R1 | UPF0183 protein C16orf70 homolog - Mus musculus (Mouse)                                                                                                                                 | 47942  | 24 | 0  | 5  | 0  |
| Q8VIG1 | RE1-silencing transcription factor (Neural-restrictive silencer factor) - Mus musculus (Mouse)                                                                                          | 119420 | 24 | 0  | 59 | 0  |
| Q8BM39 | Pre-mRNA-splicing factor 18 (PRP18 homolog) - Mus musculus (Mouse)                                                                                                                      | 40036  | 24 | 0  | 8  | 0  |
| Q9CY10 | Protein Njmu-R1 - Mus musculus (Mouse)                                                                                                                                                  | 45021  | 24 | 0  | 10 | 0  |

|        |                                                                                                                                                                                            |        |    |    |    |    |
|--------|--------------------------------------------------------------------------------------------------------------------------------------------------------------------------------------------|--------|----|----|----|----|
| Q8K057 | Intraflagellar transport 80 homolog (WD repeat protein 56) - Mus musculus (Mouse)                                                                                                          | 88440  | 24 | 0  | 10 | 0  |
| Q99PW8 | Kinesin-like protein KIF17 (MmKIF17) - Mus musculus (Mouse)                                                                                                                                | 116928 | 24 | 44 | 13 | 35 |
| Q6PDM2 | Splicing factor, arginine/serine-rich 1 - Mus musculus (Mouse)                                                                                                                             | 27842  | 24 | 91 | 5  | 6  |
| Q8CGC6 | RNA-binding protein 28 (RNA-binding motif protein 28) - Mus musculus (Mouse)                                                                                                               | 84665  | 24 | 41 | 71 | 66 |
| Q8K4Q0 | Regulatory-associated protein of mTOR (Raptor) (P150 target of rapamycin (TOR)-scaffold protein) - Mus musculus (Mouse)                                                                    | 151200 | 24 | 0  | 18 | 0  |
| Q8BHE0 | Proline-rich protein 11 - Mus musculus (Mouse)                                                                                                                                             | 41607  | 24 | 25 | 6  | 5  |
| Q9WVK4 | EH domain-containing protein 1 (mPAST1) - Mus musculus (Mouse)                                                                                                                             | 60622  | 24 | 0  | 14 | 0  |
| Q9Z1M4 | Ribosomal protein S6 kinase beta-2 (EC 2.7.11.1) (S6K-beta 2) (70 kDa ribosomal protein S6 kinase 2) (p70-S6KB) (p70 ribosomal S6 kinase beta) (p70 S6Kbeta) (S6K2) - Mus musculus (Mouse) | 53904  | 24 | 0  | 15 | 0  |
| Q9QXY6 | EH domain-containing protein 3 - Mus musculus (Mouse)                                                                                                                                      | 60888  | 24 | 0  | 5  | 0  |
| Q8K450 | Sperm-associated antigen 16 protein (PF20 protein homolog) - Mus musculus (Mouse)                                                                                                          | 72340  | 24 | 0  | 11 | 0  |
| O35906 | Transcription factor Spi-B - Mus musculus (Mouse)                                                                                                                                          | 29575  | 24 | 0  | 6  | 0  |
| Q8K411 | Presequence protease, mitochondrial precursor (EC 3.4.24.-) (Pitrilysin metalloproteinase 1) - Mus musculus (Mouse)                                                                        | 118438 | 24 | 0  | 15 | 0  |
| Q6ZWU9 | 40S ribosomal protein S27 - Mus musculus (Mouse)                                                                                                                                           | 9797   | 24 | 0  | 2  | 0  |
| Q61043 | Ninein - Mus musculus (Mouse)                                                                                                                                                              | 236852 | 24 | 0  | 48 | 0  |
| Q8VHP8 | Ras-related protein Rab-40B (SOCS box-containing protein RAR) - Mus musculus (Mouse)                                                                                                       | 31442  | 24 | 0  | 7  | 0  |
| O88543 | COP9 signalosome complex subunit 3 (Signalosome subunit 3) (SGN3) (JAB1-containing signalosome subunit 3) - Mus musculus (Mouse)                                                           | 48371  | 24 | 20 | 5  | 7  |

|        |                                                                                                                                                                                                                                                                           |        |    |    |    |    |
|--------|---------------------------------------------------------------------------------------------------------------------------------------------------------------------------------------------------------------------------------------------------------------------------|--------|----|----|----|----|
| Q62418 | Drebrin-like protein (SH3 domain containing protein 7) (Actin-binding protein 1) - Mus musculus (Mouse)                                                                                                                                                                   | 48955  | 24 | 39 | 7  | 8  |
| Q9R0L6 | Pericentriolar material 1 protein (PCM-1) (mPCM-1) - Mus musculus (Mouse)                                                                                                                                                                                                 | 230117 | 24 | 30 | 19 | 16 |
| Q6PCN7 | SWI/SNF-related matrix-associated actin-dependent regulator of chromatin subfamily A member 3 (EC 3.6.1.-) (Sucrose nonfermenting protein 2-like 3) (TNF-response element-binding protein) (P113) - Mus musculus (Mouse)                                                  | 114442 | 24 | 24 | 16 | 9  |
| Q9CY14 | Putative RNA-binding protein Luc7-like 1 - Mus musculus (Mouse)                                                                                                                                                                                                           | 44307  | 24 | 24 | 8  | 5  |
| O08756 | 3-hydroxyacyl-CoA dehydrogenase type-2 (EC 1.1.1.35) (3-hydroxyacyl-CoA dehydrogenase type II) (Type II HADH) (3-hydroxy-2-methylbutyryl-CoA dehydrogenase) (EC 1.1.1.178) (Endoplasmic reticulum-associated amyloid beta-peptide-binding protein) - Mus musculus (Mouse) | 27516  | 24 | 0  | 9  | 0  |
| O54785 | LIM domain kinase 2 (EC 2.7.11.1) (LIMK-2) - Mus musculus (Mouse)                                                                                                                                                                                                         | 73524  | 24 | 24 | 9  | 9  |
| Q9CT10 | Ran-binding protein 3 (RanBP3) - Mus musculus (Mouse)                                                                                                                                                                                                                     | 52826  | 23 | 0  | 10 | 0  |
| Q65Z40 | Wings apart-like protein homolog (Dioxin-inducible factor 2) (DIF-2) - Mus musculus (Mouse)                                                                                                                                                                               | 135626 | 23 | 0  | 20 | 0  |
| Q9DAI4 | Zinc finger and BTB domain-containing protein 43 (Zinc finger protein 297B) - Mus musculus (Mouse)                                                                                                                                                                        | 53245  | 23 | 51 | 9  | 9  |
| Q8VE62 | Polyadenylate-binding protein-interacting protein 1 (Poly(A)-binding protein-interacting protein 1) (PABP-interacting protein 1) (PAIP-1) - Mus musculus (Mouse)                                                                                                          | 46015  | 23 | 0  | 4  | 0  |
| Q8VCK5 | Kelch-like protein 20 (Kelch-like ECT2-interacting protein) - Mus musculus (Mouse)                                                                                                                                                                                        | 68338  | 23 | 0  | 22 | 0  |

|        |                                                                                                                                                                                                                                                           |        |    |    |    |    |
|--------|-----------------------------------------------------------------------------------------------------------------------------------------------------------------------------------------------------------------------------------------------------------|--------|----|----|----|----|
| Q8VHN7 | G-protein coupled receptor 98 precursor (Monogenic audiogenic seizure susceptibility protein 1) (Very large G-protein coupled receptor 1) (Neurepin) - Mus musculus (Mouse)                                                                               | 689596 | 23 | 18 | 41 | 35 |
| Q64455 | Receptor-type tyrosine-protein phosphatase eta precursor (EC 3.1.3.48) (Protein-tyrosine phosphatase eta) (R-PTP-eta) (HPTP beta-like tyrosine phosphatase) (Protein-tyrosine phosphatase receptor type J) (Susceptibility to colon cancer 1) - Mus muscu | 137723 | 23 | 0  | 13 | 0  |
| Q9D0E1 | Heterogeneous nuclear ribonucleoprotein M (hnRNP M) - Mus musculus (Mouse)                                                                                                                                                                                | 77940  | 23 | 21 | 12 | 7  |
| Q3U5C8 | Rho guanine nucleotide exchange factor 16 - Mus musculus (Mouse)                                                                                                                                                                                          | 80687  | 23 | 0  | 18 | 0  |
| Q9D8V0 | Minor histocompatibility antigen H13 (EC 3.4.99.-) (Signal peptide peptidase) (Presenilin-like protein 3) - Mus musculus (Mouse)                                                                                                                          | 42006  | 23 | 29 | 28 | 21 |
| P43406 | Integrin alpha-V precursor (Vitronectin receptor subunit alpha) (CD51 antigen) [Contains: Integrin alpha-V heavy chain; Integrin alpha-V light chain] - Mus musculus (Mouse)                                                                              | 116288 | 23 | 35 | 19 | 17 |
| P59764 | Dedicator of cytokinesis protein 4 - Mus musculus (Mouse)                                                                                                                                                                                                 | 228173 | 23 | 17 | 39 | 34 |
| Q6ZPY7 | JmjC domain-containing histone demethylation protein 2B (EC 1.14.11.-) (Jumonji domain-containing protein 1B) - Mus musculus (Mouse)                                                                                                                      | 172479 | 23 | 0  | 13 | 0  |
| Q9ET01 | Glycogen phosphorylase, liver form (EC 2.4.1.1) - Mus musculus (Mouse)                                                                                                                                                                                    | 97825  | 23 | 0  | 12 | 0  |
| Q9WUB3 | Glycogen phosphorylase, muscle form (EC 2.4.1.1) (Myophosphorylase) - Mus musculus (Mouse)                                                                                                                                                                | 97681  | 23 | 0  | 17 | 0  |
| Q8CI94 | Glycogen phosphorylase, brain form (EC 2.4.1.1) - Mus musculus (Mouse)                                                                                                                                                                                    | 97353  | 23 | 0  | 9  | 0  |



|        |                                                                                                                                                                            |        |    |    |    |    |
|--------|----------------------------------------------------------------------------------------------------------------------------------------------------------------------------|--------|----|----|----|----|
| P48758 | Carbonyl reductase [NADPH] 1 (EC 1.1.1.184) (NADPH-dependent carbonyl reductase 1) - Mus musculus (Mouse)                                                                  | 30994  | 23 | 0  | 6  | 0  |
| Q99MN9 | Propionyl-CoA carboxylase beta chain, mitochondrial precursor (EC 6.4.1.3) (PCCase subunit beta) (Propanoyl-CoA:carbon dioxide ligase subunit beta) - Mus musculus (Mouse) | 58984  | 23 | 0  | 4  | 0  |
| Q99JR1 | Sideroflexin-1 - Mus musculus (Mouse)                                                                                                                                      | 35911  | 23 | 0  | 9  | 0  |
| Q8K0E7 | Serine incorporator 2 (Tumor differentially expressed 2-like) - Mus musculus (Mouse)                                                                                       | 51756  | 23 | 0  | 1  | 0  |
| Q8K1G2 | Limbin - Mus musculus (Mouse)                                                                                                                                              | 138237 | 23 | 0  | 13 | 0  |
| O08742 | Platelet glycoprotein V precursor (GPV) (CD42D antigen) - Mus musculus (Mouse)                                                                                             | 63941  | 23 | 17 | 6  | 1  |
| Q8VHS2 | Crumbs homolog 1 precursor - Mus musculus (Mouse)                                                                                                                          | 160377 | 23 | 28 | 10 | 12 |
| Q80YV4 | Pantothenate kinase 4 (EC 2.7.1.33) (Pantothenic acid kinase 4) (mPanK4) - Mus musculus (Mouse)                                                                            | 92433  | 23 | 28 | 13 | 13 |
| Q8BGQ1 | Uncharacterized protein C14orf133 homolog - Mus musculus (Mouse)                                                                                                           | 56875  | 23 | 28 | 5  | 9  |
| Q14B48 | Coiled-coil domain-containing protein 129 - Mus musculus (Mouse)                                                                                                           | 117584 | 23 | 17 | 13 | 14 |
| Q8BN21 | Serine/threonine-protein kinase VRK2 (EC 2.7.11.1) (Vaccinia-related kinase 2) - Mus musculus (Mouse)                                                                      | 58481  | 23 | 0  | 5  | 0  |
| P41216 | Long-chain-fatty-acid--CoA ligase 1 (EC 6.2.1.3) (Long-chain acyl-CoA synthetase 1) (LACS 1) - Mus musculus (Mouse)                                                        | 78900  | 23 | 18 | 23 | 26 |
| Q91WC3 | Long-chain-fatty-acid--CoA ligase 6 (EC 6.2.1.3) (Long-chain acyl-CoA synthetase 6) (LACS 6) - Mus musculus (Mouse)                                                        | 78994  | 23 | 18 | 16 | 26 |
| P27664 | Rod cGMP-specific 3~,5~-cyclic phosphodiesterase subunit alpha (EC 3.1.4.35) (GMP-PDE alpha) - Mus musculus (Mouse)                                                        | 100437 | 23 | 0  | 15 | 0  |

|        |                                                                                                                                                                                                                                                           |        |    |    |    |    |
|--------|-----------------------------------------------------------------------------------------------------------------------------------------------------------------------------------------------------------------------------------------------------------|--------|----|----|----|----|
| Q80YR5 | Scaffold attachment factor B2 - Mus musculus (Mouse)                                                                                                                                                                                                      | 112398 | 23 | 0  | 17 | 0  |
| Q9DBL7 | Bifunctional coenzyme A synthase (CoA synthase) [Includes: Phosphopantetheine adenylyltransferase (EC 2.7.7.3) (Pantetheine-phosphate adenylyltransferase) (PPAT) (Dephospho-CoA pyrophosphorylase); Dephospho-CoA kinase (EC 2.7.1.24) (DPCK) (Dephospho | 62213  | 23 | 0  | 4  | 0  |
| Q924K1 | Aryl-hydrocarbon-interacting protein-like 1 - Mus musculus (Mouse)                                                                                                                                                                                        | 38678  | 23 | 0  | 6  | 0  |
| Q80UE6 | Serine/threonine-protein kinase WNK4 (EC 2.7.11.1) (Protein kinase with no lysine 4) (Protein kinase, lysine-deficient 4) - Mus musculus (Mouse)                                                                                                          | 133354 | 23 | 33 | 29 | 15 |
| Q9WTS5 | Teneurin-2 (Ten-2) (Tenascin-M2) (Ten-m2) (Protein Odd Oz/ten-m homolog 2) - Mus musculus (Mouse)                                                                                                                                                         | 310721 | 23 | 21 | 39 | 31 |
| Q8BP00 | IQ calmodulin-binding motif-containing protein 1 - Mus musculus (Mouse)                                                                                                                                                                                   | 69204  | 23 | 0  | 14 | 0  |
| P07607 | Thymidylate synthase (EC 2.1.1.45) (TS) (TSase) - Mus musculus (Mouse)                                                                                                                                                                                    | 35221  | 23 | 0  | 6  | 0  |
| Q88712 | C-terminal-binding protein 1 (EC 1.1.1.-) (CtBP1) - Mus musculus (Mouse)                                                                                                                                                                                  | 48084  | 23 | 0  | 5  | 0  |
| Q63943 | Myocyte-specific enhancer factor 2D - Mus musculus (Mouse)                                                                                                                                                                                                | 55187  | 23 | 0  | 3  | 0  |
| Q8BWR8 | Rhophilin-2 (GTP-Rho-binding protein 2) - Mus musculus (Mouse)                                                                                                                                                                                            | 77535  | 23 | 0  | 10 | 0  |
| Q80WT0 | Junctophilin-4 (Junctophilin-like 1 protein) - Mus musculus (Mouse)                                                                                                                                                                                       | 66302  | 23 | 0  | 7  | 0  |
| Q8C0R0 | Ubiquitin carboxyl-terminal hydrolase 37 (EC 3.1.2.15) (Ubiquitin thioesterase 37) (Ubiquitin-specific-processing protease 37) (Deubiquitinating enzyme 37) - Mus musculus (Mouse)                                                                        | 111078 | 23 | 23 | 23 | 23 |

|        |                                                                                                                                                                                                                                                           |        |    |    |    |    |
|--------|-----------------------------------------------------------------------------------------------------------------------------------------------------------------------------------------------------------------------------------------------------------|--------|----|----|----|----|
| Q8CF10 | E3 ubiquitin-protein ligase NEDD4-like protein (EC 6.3.2.-) (Nedd4-2) (NEDD4.2) - Mus musculus (Mouse)                                                                                                                                                    | 115746 | 23 | 16 | 16 | 11 |
| O08808 | Protein diaphanous homolog 1 (Diaphanous-related formin-1) (DRF1) (mDIA1) (p140mDIA) - Mus musculus (Mouse)                                                                                                                                               | 140053 | 23 | 24 | 23 | 26 |
| Q62388 | Serine-protein kinase ATM (EC 2.7.11.1) (Ataxia telangiectasia mutated homolog) (A-T, mutated homolog) - Mus musculus (Mouse)                                                                                                                             | 354054 | 23 | 21 | 42 | 21 |
| Q8R079 | Bifunctional apoptosis regulator - Mus musculus (Mouse)                                                                                                                                                                                                   | 53618  | 23 | 0  | 8  | 0  |
| Q6PB97 | F-box/LRR-repeat protein 19 (F-box and leucine-rich repeat protein 19) - Mus musculus (Mouse)                                                                                                                                                             | 75508  | 23 | 0  | 9  | 0  |
| P26516 | 26S proteasome non-ATPase regulatory subunit 7 (26S proteasome regulatory subunit rpn8) (26S proteasome regulatory subunit S12) (Proteasome subunit p40) (Mov34 protein) - Mus musculus (Mouse)                                                           | 36574  | 23 | 16 | 7  | 5  |
| Q9JI90 | E3 ubiquitin-protein ligase RNF14 (EC 6.3.2.-) (RING finger protein 14) (Androgen receptor-associated protein 54) (Protein Triad2) - Mus musculus (Mouse)                                                                                                 | 56629  | 23 | 0  | 6  | 0  |
| Q6A070 | Uncharacterized protein KIAA0423 - Mus musculus (Mouse)                                                                                                                                                                                                   | 194049 | 23 | 22 | 24 | 20 |
| Q80XJ2 | RING finger protein 168 - Mus musculus (Mouse)                                                                                                                                                                                                            | 63855  | 23 | 18 | 27 | 23 |
| Q6PD21 | SH2 domain-containing adapter protein B - Mus musculus (Mouse)                                                                                                                                                                                            | 55472  | 23 | 18 | 3  | 7  |
| Q8BH44 | Coronin-2B - Mus musculus (Mouse)                                                                                                                                                                                                                         | 54911  | 23 | 0  | 5  | 0  |
| Q9CWJ9 | Bifunctional purine biosynthesis protein PURH [Includes: Phosphoribosylaminoimidazolecarboxamide formyltransferase (EC 2.1.2.3) (5-aminoimidazole-4-carboxamide ribonucleotide formyltransferase) (AICAR transformylase); IMP cyclohydrolase (EC 3.5.4.10 | 64687  | 23 | 0  | 17 | 0  |

|        |                                                                                                                                                                                                                                                                                                                                                                                                                                |        |    |    |    |    |
|--------|--------------------------------------------------------------------------------------------------------------------------------------------------------------------------------------------------------------------------------------------------------------------------------------------------------------------------------------------------------------------------------------------------------------------------------|--------|----|----|----|----|
| P41242 | Megakaryocyte-associated tyrosine-protein kinase (EC 2.7.10.2) (Tyrosine-protein kinase CTK) (Protein kinase NTK) - Mus musculus (Mouse)                                                                                                                                                                                                                                                                                       | 56591  | 23 | 0  | 12 | 0  |
| O35066 | Kinesin-like protein KIF3C - Mus musculus (Mouse)                                                                                                                                                                                                                                                                                                                                                                              | 90131  | 23 | 37 | 8  | 18 |
| O54990 | Prominin-1 precursor (Prominin-like protein 1) (Antigen AC133 homolog) - Mus musculus (Mouse)                                                                                                                                                                                                                                                                                                                                  | 98248  | 23 | 0  | 8  | 0  |
| Q6NXY1 | WD repeat protein 67 (Protein 4-B-3) - Mus musculus (Mouse)                                                                                                                                                                                                                                                                                                                                                                    | 116563 | 23 | 0  | 12 | 0  |
| P54103 | Zuotin-related factor 1 - Mus musculus (Mouse)                                                                                                                                                                                                                                                                                                                                                                                 | 59816  | 23 | 27 | 11 | 13 |
| P62245 | 40S ribosomal protein S15a - Mus musculus (Mouse)                                                                                                                                                                                                                                                                                                                                                                              | 14944  | 23 | 19 | 6  | 3  |
| O35887 | Calumenin precursor (Crocabin) - Mus musculus (Mouse)                                                                                                                                                                                                                                                                                                                                                                          | 37155  | 23 | 0  | 5  | 0  |
| P16014 | Secretogranin-1 precursor (Secretogranin I) (Sgl) (Chromogranin B) (CgB) - Mus musculus (Mouse)                                                                                                                                                                                                                                                                                                                                | 78036  | 23 | 0  | 14 | 0  |
| P24527 | Leukotriene A-4 hydrolase (EC 3.3.2.6) (LTA-4 hydrolase) (Leukotriene A(4) hydrolase) - Mus musculus (Mouse)                                                                                                                                                                                                                                                                                                                   | 69604  | 23 | 0  | 21 | 0  |
| Q8VI84 | Nucleolar complex protein 3 homolog (NOC3 protein homolog) (NOC3-like protein) (Nucleolar complex-associated protein 3-like protein) (Factor for adipocyte differentiation 24) - Mus musculus (Mouse)                                                                                                                                                                                                                          | 93737  | 23 | 0  | 13 | 0  |
| P97821 | Dipeptidyl-peptidase 1 precursor (EC 3.4.14.1) (Dipeptidyl-peptidase I) (DPP-I) (DPPI) (Cathepsin C) (Cathepsin J) (Dipeptidyl transferase) [Contains: Dipeptidyl-peptidase 1 exclusion domain chain (Dipeptidyl-peptidase I exclusion domain chain); Dipeptidyl-peptidase 1 heavy chain (Dipeptidyl-peptidase I heavy chain); Dipeptidyl-peptidase 1 light chain (Dipeptidyl-peptidase I light chain)] - Mus musculus (Mouse) | 53141  | 23 | 0  | 3  | 0  |

|        |                                                                                                                                                                                                                                                           |        |    |   |    |   |
|--------|-----------------------------------------------------------------------------------------------------------------------------------------------------------------------------------------------------------------------------------------------------------|--------|----|---|----|---|
| Q91WJ8 | Far upstream element-binding protein 1 (FUSE-binding protein 1) (FBP) - Mus musculus (Mouse)                                                                                                                                                              | 68668  | 23 | 0 | 12 | 0 |
| P56384 | ATP synthase lipid-binding protein, mitochondrial precursor (EC 3.6.3.14) (ATP synthase proteolipid P3) (ATPase protein 9) (ATPase subunit C) - Mus musculus (Mouse)                                                                                      | 14907  | 23 | 0 | 1  | 0 |
| Q6WBX7 | Cell cycle checkpoint control protein RAD9B homolog (RAD9 homolog B) (mRAD9B) - Mus musculus (Mouse)                                                                                                                                                      | 45439  | 23 | 0 | 8  | 0 |
| Q02496 | Mucin-1 precursor (Polymorphic epithelial mucin) (PEMT) (Episialin) - Mus musculus (Mouse)                                                                                                                                                                | 64754  | 23 | 0 | 7  | 0 |
| Q7TT50 | Serine/threonine-protein kinase MRCK beta (EC 2.7.11.1) (CDC42-binding protein kinase beta) (Myotonic dystrophy kinase-related CDC42-binding kinase beta) (Myotonic dystrophy protein kinase-like beta) (MRCK beta) (DMPK-like beta) - Mus musculus (Mous | 196539 | 23 | 0 | 33 | 0 |
| Q8C050 | Ribosomal protein S6 kinase alpha-5 (EC 2.7.11.1) (Nuclear mitogen- and stress-activated protein kinase 1) (90 kDa ribosomal protein S6 kinase 5) (RSK-like protein kinase) (RLSK) - Mus musculus (Mouse)                                                 | 97150  | 23 | 0 | 13 | 0 |
| Q6R0H7 | Guanine nucleotide-binding protein G(s) subunit alpha isoforms XLas (Adenylate cyclase-stimulating G alpha protein) (Extra large alphas protein) (XLalphas) - Mus musculus (Mouse)                                                                        | 122513 | 23 | 0 | 23 | 0 |
| P63094 | Guanine nucleotide-binding protein G(s) subunit alpha isoforms short (Adenylate cyclase-stimulating G alpha protein) - Mus musculus (Mouse)                                                                                                               | 46091  | 23 | 0 | 19 | 0 |
| Q80T74 | Kelch-like protein 29 (Kelch repeat and BTB domain-containing protein 9) - Mus musculus (Mouse)                                                                                                                                                           | 72237  | 23 | 0 | 12 | 0 |

|        |                                                                                                                                                                                                                              |        |    |     |    |    |
|--------|------------------------------------------------------------------------------------------------------------------------------------------------------------------------------------------------------------------------------|--------|----|-----|----|----|
| Q3U3Q1 | Serine/threonine-protein kinase ULK3 (EC 2.7.11.1) (Unc-51-like kinase 3) - Mus musculus (Mouse)                                                                                                                             | 53880  | 23 | 18  | 10 | 9  |
| Q91X86 | Transmembrane protein 98 - Mus musculus (Mouse)                                                                                                                                                                              | 24953  | 23 | 0   | 5  | 0  |
| Q9WV80 | Sorting nexin-1 - Mus musculus (Mouse)                                                                                                                                                                                       | 59030  | 23 | 49  | 11 | 11 |
| Q9WTL7 | Acyl-protein thioesterase 2 (EC 3.1.2.-) (Lysophospholipase II) (Lysophospholipase 2) (mLyso II) - Mus musculus (Mouse)                                                                                                      | 25120  | 23 | 49  | 3  | 5  |
| Q8QZS3 | Folliculin - Mus musculus (Mouse)                                                                                                                                                                                            | 65312  | 23 | 0   | 8  | 0  |
| P58404 | Striatin-4 (Zinedin) - Mus musculus (Mouse)                                                                                                                                                                                  | 82235  | 23 | 0   | 8  | 0  |
| Q80WJ6 | Multidrug resistance-associated protein 9 (ATP-binding cassette transporter sub-family C member 12) - Mus musculus (Mouse)                                                                                                   | 154331 | 23 | 20  | 29 | 13 |
| Q8R550 | SH3 domain-containing kinase-binding protein 1 (SH3-containing, expressed in tumorigenic astrocytes) (Regulator of ubiquitous kinase) (Ruk) - Mus musculus (Mouse)                                                           | 78293  | 23 | 0   | 7  | 0  |
| Q811G0 | Protein PTHB1 (Parathyroid hormone-responsive B1 gene protein homolog) - Mus musculus (Mouse)                                                                                                                                | 100192 | 23 | 0   | 19 | 0  |
| Q9Z329 | Inositol 1,4,5-trisphosphate receptor type 2 (Type 2 inositol 1,4,5-trisphosphate receptor) (Type 2 InsP3 receptor) (IP3 receptor isoform 2) (InsP3R2) (Inositol 1,4,5-trisphosphate type V receptor) - Mus musculus (Mouse) | 310443 | 23 | 0   | 45 | 0  |
| P70170 | ATP-binding cassette transporter sub-family C member 9 (Sulfonylurea receptor 2) - Mus musculus (Mouse)                                                                                                                      | 175495 | 23 | 0   | 6  | 0  |
| Q80T23 | Synaptotagmin-like protein 5 - Mus musculus (Mouse)                                                                                                                                                                          | 84892  | 23 | 0   | 19 | 0  |
| P70670 | Nascent polypeptide-associated complex subunit alpha, muscle-specific form (Alpha-NAC, muscle-specific form) - Mus musculus (Mouse)                                                                                          | 221379 | 22 | 130 | 29 | 22 |

|        |                                                                                                                                                                                      |        |    |    |    |    |
|--------|--------------------------------------------------------------------------------------------------------------------------------------------------------------------------------------|--------|----|----|----|----|
| Q9JIB6 | Baculoviral IAP repeat-containing protein 1f (Neuronal apoptosis inhibitory protein 6) - Mus musculus (Mouse)                                                                        | 161889 | 22 | 0  | 16 | 0  |
| Q69ZA1 | Cell division cycle 2-like protein kinase 5 (EC 2.7.11.22) (CDC2-related protein kinase 5) - Mus musculus (Mouse)                                                                    | 165250 | 22 | 0  | 16 | 0  |
| Q61037 | Tuberin (Tuberous sclerosis 2 homolog protein) - Mus musculus (Mouse)                                                                                                                | 204395 | 22 | 46 | 38 | 91 |
| Q925Q8 | Dachshund homolog 2 (Dach2) - Mus musculus (Mouse)                                                                                                                                   | 68944  | 22 | 30 | 9  | 8  |
| Q9WTR1 | Transient receptor potential cation channel subfamily V member 2 (TrpV2) (osm-9-like TRP channel 2) (OTRPC2) (Growth factor-regulated calcium channel) (GRC) - Mus musculus (Mouse)  | 86709  | 22 | 30 | 5  | 10 |
| Q8VD46 | Ankyrin repeat, SAM and basic leucine zipper domain-containing protein 1 (Germ cell-specific ankyrin, SAM and basic leucine zipper domain-containing protein) - Mus musculus (Mouse) | 53394  | 22 | 0  | 7  | 0  |
| Q99PL5 | Ribosome-binding protein 1 (Ribosome receptor protein) (mRRp) - Mus musculus (Mouse)                                                                                                 | 173232 | 22 | 0  | 40 | 0  |
| Q9WVS7 | Dual specificity mitogen-activated protein kinase kinase 5 (EC 2.7.12.2) (MAP kinase kinase 5) (MAPKK 5) (MAPK/ERK kinase 5) - Mus musculus (Mouse)                                  | 50529  | 22 | 22 | 17 | 11 |
| Q8BIJ6 | Isoleucyl-tRNA synthetase, mitochondrial precursor (EC 6.1.1.5) (Isoleucine--tRNA ligase) (IleRS) - Mus musculus (Mouse)                                                             | 113873 | 22 | 0  | 9  | 0  |
| Q99JH7 | Calsyntenin-3 precursor - Mus musculus (Mouse)                                                                                                                                       | 107117 | 22 | 22 | 7  | 5  |
| Q8R519 | 2-amino-3-carboxymuconate-6-semialdehyde decarboxylase (EC 4.1.1.45) - Mus musculus (Mouse)                                                                                          | 38401  | 22 | 0  | 7  | 0  |

|        |                                                                                                                                                                                                                   |        |    |    |    |    |
|--------|-------------------------------------------------------------------------------------------------------------------------------------------------------------------------------------------------------------------|--------|----|----|----|----|
| P50592 | Tumor necrosis factor ligand superfamily member 10 (TNF-related apoptosis-inducing ligand) (Protein TRAIL) (CD253 antigen) - Mus musculus (Mouse)                                                                 | 33684  | 22 | 0  | 8  | 0  |
| Q80W04 | Transmembrane and coiled-coil domains protein 2 - Mus musculus (Mouse)                                                                                                                                            | 77292  | 22 | 0  | 9  | 0  |
| Q8BG26 | RUN and SH3 domain-containing protein 1 - Mus musculus (Mouse)                                                                                                                                                    | 96333  | 22 | 18 | 8  | 4  |
| Q9WVS0 | Inducible T-cell co-stimulator precursor (Activation-inducible lymphocyte immunomediatory molecule) (CD28 and CTLA-4-like protein) (CCLP) (CD28-related protein 1) (CRP-1) (CD278 antigen) - Mus musculus (Mouse) | 23265  | 22 | 0  | 1  | 0  |
| Q00558 | Factor VIII intron 22 protein (CpG island protein) - Mus musculus (Mouse)                                                                                                                                         | 40920  | 22 | 19 | 3  | 3  |
| Q8C190 | Zinc finger CCCH domain-containing protein C19orf7 homolog - Mus musculus (Mouse)                                                                                                                                 | 141564 | 22 | 0  | 7  | 0  |
| Q9ET80 | Junctophilin-1 (Junctophilin type 1) (JP-1) - Mus musculus (Mouse)                                                                                                                                                | 72374  | 22 | 0  | 22 | 0  |
| Q3V1H1 | Cytoskeleton-associated protein 2 - Mus musculus (Mouse)                                                                                                                                                          | 74440  | 22 | 0  | 11 | 0  |
| P40124 | Adenylyl cyclase-associated protein 1 (CAP 1) - Mus musculus (Mouse)                                                                                                                                              | 51885  | 22 | 43 | 8  | 9  |
| Q3U186 | Probable arginyl-tRNA synthetase, mitochondrial precursor (EC 6.1.1.19) (Arginine--tRNA ligase) (ArgRS) (Arginyl-tRNA synthetase-like) - Mus musculus (Mouse)                                                     | 65865  | 22 | 21 | 37 | 41 |
| P26011 | Integrin beta-7 precursor (Integrin beta-P) (M290 IEL antigen) - Mus musculus (Mouse)                                                                                                                             | 90491  | 22 | 0  | 5  | 0  |
| Q9R1X4 | Timeless homolog (mTim) - Mus musculus (Mouse)                                                                                                                                                                    | 138215 | 22 | 25 | 16 | 9  |



|        |                                                                                                                                                                                                                                                                                      |        |    |    |    |    |
|--------|--------------------------------------------------------------------------------------------------------------------------------------------------------------------------------------------------------------------------------------------------------------------------------------|--------|----|----|----|----|
| Q9Z0R0 | Serine/threonine-protein kinase Haspin (EC 2.7.11.1) (Haploid germ cell-specific nuclear protein kinase) (Germ cell-specific gene 2 protein) - Mus musculus (Mouse)                                                                                                                  | 85326  | 22 | 0  | 7  | 0  |
| P70268 | Serine/threonine-protein kinase N1 (EC 2.7.11.13) (Protein kinase C-like 1) (Protein-kinase C-related kinase 1) (Protein kinase C-like PKN) (Serine-threonine protein kinase N) - Mus musculus (Mouse)                                                                               | 105087 | 22 | 25 | 14 | 4  |
| Q9WTZ2 | Membrane-bound transcription factor site-1 protease precursor (EC 3.4.21.112) (S1P endopeptidase) (Site-1 protease) (Subtilisin/kexin isozyme 1) (SKI-1) (Sterol-regulated luminal protease) - Mus musculus (Mouse)                                                                  | 118124 | 22 | 0  | 7  | 0  |
| Q91XI1 | tRNA-dihydrouridine synthase 3-like (EC 1.-.-.-) - Mus musculus (Mouse)                                                                                                                                                                                                              | 72401  | 22 | 0  | 6  | 0  |
| Q9JL8  | Seryl-tRNA synthetase, mitochondrial precursor (EC 6.1.1.11) (Serine--tRNA ligase) (SerRSmt) - Mus musculus (Mouse)                                                                                                                                                                  | 58779  | 22 | 0  | 6  | 0  |
| Q52KI8 | Serine/arginine repetitive matrix protein 1 (Plenty-of-prolines 101) - Mus musculus (Mouse)                                                                                                                                                                                          | 106885 | 22 | 73 | 29 | 20 |
| Q6PGB8 | Probable global transcription activator SNF2L1 (EC 3.6.1.-) (Nucleosome remodeling factor subunit SNF2L) (ATP-dependent helicase SMARCA1) (SWI/SNF-related matrix-associated actin-dependent regulator of chromatin subfamily A member 1) (DNA-dependent                             | 122322 | 22 | 0  | 24 | 0  |
| P06869 | Urokinase-type plasminogen activator precursor (EC 3.4.21.73) (uPA) (U-plasminogen activator) [Contains: Urokinase-type plasminogen activator long chain A; Urokinase-type plasminogen activator short chain A; Urokinase-type plasminogen activator chain B] - Mus musculus (Mouse) | 49662  | 22 | 0  | 5  | 0  |

|        |                                                                                                                                                                                                  |        |    |    |    |    |
|--------|--------------------------------------------------------------------------------------------------------------------------------------------------------------------------------------------------|--------|----|----|----|----|
| Q9CQL5 | 39S ribosomal protein L18, mitochondrial precursor (L18mt) (MRP-L18) - Mus musculus (Mouse)                                                                                                      | 20949  | 22 | 0  | 6  | 0  |
| Q5XJV6 | Serine/threonine-protein kinase LMTK3 precursor (EC 2.7.11.1) (Lemur tyrosine kinase 3) - Mus musculus (Mouse)                                                                                   | 151881 | 22 | 0  | 7  | 0  |
| Q9Z2Q5 | 39S ribosomal protein L40, mitochondrial precursor (L40mt) (MRP-40) (Nuclear localization signal-containing protein deleted in velocardiofacial syndrome homolog) - Mus musculus (Mouse)         | 24400  | 22 | 0  | 6  | 0  |
| O88799 | Zonadhesin precursor - Mus musculus (Mouse)                                                                                                                                                      | 609345 | 22 | 26 | 25 | 17 |
| Q9D832 | DnaJ homolog subfamily B member 4 - Mus musculus (Mouse)                                                                                                                                         | 37929  | 22 | 0  | 7  | 0  |
| Q8VDX6 | Transmembrane protein 5 - Mus musculus (Mouse)                                                                                                                                                   | 51867  | 22 | 28 | 5  | 11 |
| Q9D187 | Protein FAM96B - Mus musculus (Mouse)                                                                                                                                                            | 17770  | 22 | 0  | 2  | 0  |
| O88520 | Leucine-rich repeat protein SHOC-2 (Ras-binding protein Sur-8) - Mus musculus (Mouse)                                                                                                            | 65309  | 22 | 0  | 19 | 0  |
| Q9QXS6 | Drebrin (Developmentally-regulated brain protein) - Mus musculus (Mouse)                                                                                                                         | 77981  | 22 | 19 | 8  | 11 |
| Q7TNF8 | Peripheral-type benzodiazepine receptor-associated protein 1 (PRAX-1) (Peripheral benzodiazepine receptor-interacting protein) (PBR-IP) (RIM-binding protein 1) (RIM-BP1) - Mus musculus (Mouse) | 202143 | 22 | 0  | 13 | 0  |
| Q8C1B2 | TCDD-inducible poly [ADP-ribose] polymerase (EC 2.4.2.30) - Mus musculus (Mouse)                                                                                                                 | 76764  | 22 | 0  | 6  | 0  |
| Q6PGG2 | GEM-interacting protein (GMIP) - Mus musculus (Mouse)                                                                                                                                            | 108676 | 22 | 16 | 11 | 8  |
| P47738 | Aldehyde dehydrogenase, mitochondrial precursor (EC 1.2.1.3) (ALDH class 2) (AHD-M1) (ALDHI) (ALDH-E2) - Mus musculus (Mouse)                                                                    | 57015  | 22 | 0  | 4  | 0  |
| Q9ES17 | Interleukin-21 precursor (IL-21) - Mus musculus (Mouse)                                                                                                                                          | 17085  | 22 | 25 | 6  | 5  |

|        |                                                                                                                                                                                                                  |        |    |    |    |    |
|--------|------------------------------------------------------------------------------------------------------------------------------------------------------------------------------------------------------------------|--------|----|----|----|----|
| Q8BMG7 | Rab3 GTPase-activating protein non-catalytic subunit (Rab3 GTPase-activating protein 150 kDa subunit) (Rab3-GAP p150) (Rab3-GAP regulatory subunit) (RAB3-GAP150) - Mus musculus (Mouse)                         | 154035 | 22 | 18 | 19 | 23 |
| Q91VN0 | Low-density lipoprotein receptor-related protein 5 precursor (LRP7) (Lr3) - Mus musculus (Mouse)                                                                                                                 | 182033 | 22 | 19 | 21 | 18 |
| Q61087 | Laminin subunit beta-3 precursor (Laminin 5 beta 3) (Kalinin B1 chain) - Mus musculus (Mouse)                                                                                                                    | 132790 | 22 | 23 | 19 | 15 |
| Q9QXL1 | Kinesin family member 21B (Kinesin-like protein KIF6) - Mus musculus (Mouse)                                                                                                                                     | 187873 | 22 | 45 | 26 | 25 |
| Q7TSJ6 | Serine/threonine-protein kinase LATS2 (EC 2.7.11.1) (Large tumor suppressor homolog 2) (Serine/threonine-protein kinase kpm) (Kinase phosphorylated during mitosis protein) - Mus musculus (Mouse)               | 116312 | 22 | 0  | 11 | 0  |
| Q91X17 | Uromodulin precursor (Tamm-Horsfall urinary glycoprotein) (THP) - Mus musculus (Mouse)                                                                                                                           | 73535  | 22 | 0  | 6  | 0  |
| Q8BHC0 | Lymphatic vessel endothelial hyaluronic acid receptor 1 precursor (LYVE-1) (Cell surface retention sequence-binding protein 1) (CRSBP-1) (Extracellular link domain-containing protein 1) - Mus musculus (Mouse) | 35065  | 22 | 0  | 7  | 0  |
| Q62137 | Tyrosine-protein kinase JAK3 (EC 2.7.10.2) (Janus kinase 3) (JAK-3) - Mus musculus (Mouse)                                                                                                                       | 146732 | 22 | 21 | 17 | 8  |
| Q7TMF5 | Serpin A12 precursor (Visceral adipose-specific serpin) (Visceral adipose tissue-derived serine protease inhibitor) (Vaspin) - Mus musculus (Mouse)                                                              | 47660  | 22 | 0  | 14 | 0  |
| Q8VCM3 | Zinc finger FYVE domain-containing protein 21 - Mus musculus (Mouse)                                                                                                                                             | 26885  | 22 | 0  | 9  | 0  |

|        |                                                                                                                                                                        |        |    |    |    |    |
|--------|------------------------------------------------------------------------------------------------------------------------------------------------------------------------|--------|----|----|----|----|
| Q60716 | Prolyl 4-hydroxylase subunit alpha-2 precursor (EC 1.14.11.2) (4-PH alpha-2) (Procollagen-proline,2-oxoglutarate-4-dioxygenase alpha-2 subunit) - Mus musculus (Mouse) | 61306  | 22 | 27 | 8  | 10 |
| Q8CAV0 | UPF0054 protein C21orf57 homolog - Mus musculus (Mouse)                                                                                                                | 19205  | 22 | 0  | 3  | 0  |
| Q7TNF0 | Double C2-like domain-containing protein alpha (Doc2-alpha) - Mus musculus (Mouse)                                                                                     | 45208  | 22 | 0  | 4  | 0  |
| Q5SSE9 | ATP-binding cassette sub-family A member 13 - Mus musculus (Mouse)                                                                                                     | 573209 | 22 | 23 | 33 | 38 |
| Q6PDJ6 | F-box only protein 42 - Mus musculus (Mouse)                                                                                                                           | 78469  | 22 | 0  | 12 | 0  |
| Q5DU25 | IQ motif and Sec7 domain-containing protein 2 - Mus musculus (Mouse)                                                                                                   | 162663 | 22 | 0  | 17 | 0  |
| Q8BGE5 | Fanconi anemia group M protein homolog (EC 3.6.1.-) (ATP-dependent RNA helicase FANCM) (Protein FACM) - Mus musculus (Mouse)                                           | 228328 | 22 | 21 | 22 | 20 |
| Q8VIH1 | Homeobox protein NOBOX (Newborn ovary homeobox protein) (Homeodomain-containing protein OG-2) (Oocyte-specific homeobox protein) - Mus musculus (Mouse)                | 57928  | 22 | 22 | 6  | 12 |
| Q8BH43 | Wiskott-Aldrich syndrome protein family member 2 (WASP-family protein member 2) (Protein WAVE-2) - Mus musculus (Mouse)                                                | 54268  | 22 | 0  | 3  | 0  |
| Q924S8 | Sprouty-related, EVH1 domain-containing protein 1 (Spred-1) - Mus musculus (Mouse)                                                                                     | 51943  | 22 | 0  | 9  | 0  |
| Q9EPW9 | Toll-like receptor 6 precursor (CD286 antigen) - Mus musculus (Mouse)                                                                                                  | 92255  | 22 | 0  | 11 | 0  |
| P09602 | Nonhistone chromosomal protein HMG-17 (High-mobility group nucleosome-binding domain-containing protein 2) - Mus musculus (Mouse)                                      | 9417   | 22 | 0  | 1  | 0  |

|        |                                                                                                                                                                                                                                                           |        |    |    |    |    |
|--------|-----------------------------------------------------------------------------------------------------------------------------------------------------------------------------------------------------------------------------------------------------------|--------|----|----|----|----|
| P97379 | Ras GTPase-activating protein-binding protein 2 (G3BP-2) (GAP SH3 domain-binding protein 2) - Mus musculus (Mouse)                                                                                                                                        | 54112  | 22 | 0  | 6  | 0  |
| Q9DCL9 | Multifunctional protein ADE2 [Includes: Phosphoribosylaminoimidazole-succinocarboxamide synthase (EC 6.3.2.6) (SAICAR synthetase); Phosphoribosylaminoimidazole carboxylase (EC 4.1.1.21) (AIR carboxylase) (AIRC)] - Mus musculus (Mouse)                | 47781  | 22 | 0  | 26 | 0  |
| Q05895 | Thrombospondin-3 precursor - Mus musculus (Mouse)                                                                                                                                                                                                         | 106701 | 22 | 0  | 9  | 0  |
| P61407 | Tudor domain-containing protein 6 - Mus musculus (Mouse)                                                                                                                                                                                                  | 241241 | 22 | 22 | 24 | 28 |
| P27641 | ATP-dependent DNA helicase 2 subunit 2 (EC 3.6.1.-) (ATP-dependent DNA helicase II 80 kDa subunit) (Ku autoantigen protein p86 homolog) (Ku80) (CTC box-binding factor 85 kDa subunit) (CTCBF) (CTC85) (Nuclear factor IV) (DNA-repair protein XRCC5) - M | 84069  | 22 | 29 | 16 | 22 |
| O89029 | Matrilin-4 precursor (MAT-4) - Mus musculus (Mouse)                                                                                                                                                                                                       | 70699  | 22 | 22 | 85 | 89 |
| Q9QXG4 | Acetyl-coenzyme A synthetase, cytoplasmic (EC 6.2.1.1) (Acetate--CoA ligase) (Acyl-activating enzyme) (Acetyl-CoA synthetase) (ACS) (AceCS) (Acyl-CoA synthetase short-chain family member 2) - Mus musculus (Mouse)                                      | 80068  | 22 | 0  | 4  | 0  |
| P20181 | Neurotrophin-3 precursor (NT-3) (Neurotrophic factor) (HDNF) (Nerve growth factor 2) (NGF-2) - Mus musculus (Mouse)                                                                                                                                       | 29911  | 22 | 0  | 8  | 0  |
| P34056 | Transcription factor AP-2 alpha (AP2-alpha) (Activating enhancer-binding protein 2 alpha) (Activator protein 2) (AP-2) - Mus musculus (Mouse)                                                                                                             | 48341  | 22 | 22 | 5  | 3  |
| Q8C190 | Uncharacterized protein C16orf7 homolog (5-day ovary-specific transcript 1 protein) - Mus musculus (Mouse)                                                                                                                                                | 72265  | 22 | 19 | 9  | 14 |

|        |                                                                                                                                                                     |        |    |    |    |    |
|--------|---------------------------------------------------------------------------------------------------------------------------------------------------------------------|--------|----|----|----|----|
| P23881 | Transcription elongation factor A protein 3 (Transcription elongation factor S-II protein 3) (Transcription elongation factor TFIIIS.h) - Mus musculus (Mouse)      | 39566  | 22 | 0  | 7  | 0  |
| Q5SYL3 | UPF0378 family protein KIAA0100 precursor - Mus musculus (Mouse)                                                                                                    | 256817 | 22 | 16 | 34 | 31 |
| Q80UM7 | Mannosyl-oligosaccharide glucosidase (EC 3.2.1.106) (Glycoprotein-processing glucosidase I) (Glucosidase 1) - Mus musculus (Mouse)                                  | 91945  | 22 | 0  | 11 | 0  |
| Q9QXK2 | Postreplication repair protein RAD18 (mRAD18Sc) - Mus musculus (Mouse)                                                                                              | 58345  | 22 | 18 | 21 | 23 |
| Q640M1 | U3 small nucleolar RNA-associated protein 14 homolog A (Juvenile spermatogonial depletion-like X-linked protein) (Jsd-like X-linked protein) - Mus musculus (Mouse) | 87326  | 22 | 31 | 11 | 22 |
| Q3UVK0 | Probable peptidase KIAA1815 (EC 3.4.-.-) - Mus musculus (Mouse)                                                                                                     | 100769 | 22 | 23 | 9  | 9  |
| Q9QYS2 | Metabotropic glutamate receptor 3 precursor (mGluR3) - Mus musculus (Mouse)                                                                                         | 100932 | 22 | 21 | 12 | 15 |
| Q9DAK9 | 14 kDa phosphohistidine phosphatase (EC 3.1.3.-) (Phosphohistidine phosphatase 1) - Mus musculus (Mouse)                                                            | 14159  | 22 | 0  | 3  | 0  |
| Q3UKC1 | Tax1-binding protein 1 homolog - Mus musculus (Mouse)                                                                                                               | 94655  | 22 | 27 | 24 | 30 |
| Q3UXZ6 | Protein FAM81A - Mus musculus (Mouse)                                                                                                                               | 41798  | 22 | 27 | 13 | 8  |
| Q8BGW0 | Uncharacterized protein C6orf190 homolog - Mus musculus (Mouse)                                                                                                     | 73362  | 22 | 0  | 14 | 0  |
| Q9D9T8 | EF-hand domain-containing protein 1 - Mus musculus (Mouse)                                                                                                          | 75493  | 22 | 15 | 10 | 12 |
| Q63ZV0 | Insulinoma-associated protein 1 (Zinc finger protein IA-1) - Mus musculus (Mouse)                                                                                   | 55042  | 22 | 16 | 24 | 28 |
| Q8C196 | Carbamoyl-phosphate synthase [ammonia], mitochondrial precursor (EC 6.3.4.16) (Carbamoyl-phosphate synthetase I) (CPSase I) - Mus musculus (Mouse)                  | 165711 | 22 | 25 | 19 | 15 |

|        |                                                                                                                                                                                              |        |    |    |    |    |
|--------|----------------------------------------------------------------------------------------------------------------------------------------------------------------------------------------------|--------|----|----|----|----|
| Q62209 | Synaptonemal complex protein 1 (SCP-1) - Mus musculus (Mouse)                                                                                                                                | 116518 | 22 | 0  | 16 | 0  |
| Q8BIA3 | Homeobox protein Mohawk - Mus musculus (Mouse)                                                                                                                                               | 39491  | 22 | 0  | 6  | 0  |
| Q9CWL8 | Beta-catenin-like protein 1 (Nuclear-associated protein) (NAP) - Mus musculus (Mouse)                                                                                                        | 65395  | 22 | 0  | 59 | 0  |
| Q80TN4 | DnaJ homolog subfamily C member 16 precursor - Mus musculus (Mouse)                                                                                                                          | 89479  | 22 | 0  | 4  | 0  |
| Q8R3N1 | Probable nucleolar complex protein 14 - Mus musculus (Mouse)                                                                                                                                 | 99396  | 22 | 21 | 23 | 31 |
| Q9R016 | Baculoviral IAP repeat-containing protein 1e (Neuronal apoptosis inhibitory protein 5) - Mus musculus (Mouse)                                                                                | 161761 | 21 | 28 | 20 | 8  |
| Q9QWK5 | Baculoviral IAP repeat-containing protein 1a (Neuronal apoptosis inhibitory protein 1) - Mus musculus (Mouse)                                                                                | 160872 | 21 | 28 | 20 | 12 |
| Q9QUK4 | Baculoviral IAP repeat-containing protein 1b (Neuronal apoptosis inhibitory protein 2) - Mus musculus (Mouse)                                                                                | 166324 | 21 | 28 | 14 | 8  |
| Q9JIB3 | Baculoviral IAP repeat-containing protein 1g (Neuronal apoptosis inhibitory protein 7) - Mus musculus (Mouse)                                                                                | 161785 | 21 | 0  | 15 | 0  |
| Q50L41 | Cytosolic phospholipase A2 zeta (EC 3.1.1.4) (cPLA2-zeta) (Phospholipase A2 group IVF) - Mus musculus (Mouse)                                                                                | 97381  | 21 | 0  | 14 | 0  |
| P47867 | Secretogranin-3 precursor (Secretogranin III) (SgIII) - Mus musculus (Mouse)                                                                                                                 | 53294  | 21 | 26 | 6  | 8  |
| Q91ZX6 | Sentrin-specific protease 2 (EC 3.4.22.-) (Sentrin/SUMO-specific protease SENP2) (SUMO-1/Smt3-specific isopeptidase 2) (Smt3ip2) (Axam2) (SUMO-1 protease 1) (SuPr-1) - Mus musculus (Mouse) | 68164  | 21 | 17 | 11 | 9  |
| Q9WVS4 | MAPK/MAK/MRK overlapping kinase (EC 2.7.11.22) (MOK protein kinase) - Mus musculus (Mouse)                                                                                                   | 48661  | 21 | 0  | 9  | 0  |
| Q9QXS1 | Plectin-1 (Plectin-6) (PLTN) (PCN) - Mus musculus (Mouse)                                                                                                                                    | 535828 | 21 | 0  | 87 | 0  |

|        |                                                                                                                                                                |        |    |    |    |    |
|--------|----------------------------------------------------------------------------------------------------------------------------------------------------------------|--------|----|----|----|----|
| Q61493 | DNA polymerase zeta catalytic subunit (EC 2.7.7.7) (Seizure-related protein 4) - Mus musculus (Mouse)                                                          | 353975 | 21 | 0  | 29 | 0  |
| Q810U4 | Neuronal cell adhesion molecule precursor (Nr-CAM) (NgCAM-related cell adhesion molecule) (Ng-CAM-related) (mBravo) - Mus musculus (Mouse)                     | 139290 | 21 | 0  | 26 | 0  |
| Q61457 | G1/S-specific cyclin-E1 - Mus musculus (Mouse)                                                                                                                 | 56916  | 21 | 0  | 3  | 0  |
| Q80UG5 | Septin-9 (SL3-3 integration site 1 protein) - Mus musculus (Mouse)                                                                                             | 65876  | 21 | 0  | 10 | 0  |
| Q9WU66 | Secreted frizzled-related protein 5 precursor (sFRP-5) - Mus musculus (Mouse)                                                                                  | 36270  | 21 | 0  | 1  | 0  |
| P11103 | Poly [ADP-ribose] polymerase 1 (EC 2.4.2.30) (PARP-1) (ADPRT) (NAD(+)) ADP-ribosyltransferase 1) (Poly[ADP-ribose] synthetase 1) (msPARP) Mus musculus (Mouse) | 113827 | 21 | 26 | 17 | 9  |
| Q921J2 | GTP-binding protein Rheb (Ras homolog enriched in brain) - Mus musculus (Mouse)                                                                                | 20496  | 21 | 44 | 31 | 25 |
| Q8VIM6 | Stereocilin precursor - Mus musculus (Mouse)                                                                                                                   | 198560 | 21 | 21 | 40 | 56 |
| Q9R0H5 | Keratin, type II cytoskeletal 6G (Cytokeratin-6G) (CK 6G) (K6g keratin) (Keratin-K6irs) (mK6irs1/Krt2-6g) (Keratin-71) - Mus musculus (Mouse)                  | 57860  | 21 | 22 | 14 | 11 |
| P70335 | Rho-associated protein kinase 1 (EC 2.7.11.1) (Rho-associated, coiled-coil-containing protein kinase 1) (p160 ROCK-1) (p160ROCK) - Mus musculus (Mouse)        | 159041 | 21 | 0  | 30 | 0  |
| P50220 | Thyroid transcription factor 1 (Thyroid nuclear factor 1) (TTF-1) (Homeobox protein Nkx-2.1) - Mus musculus (Mouse)                                            | 38774  | 21 | 0  | 7  | 0  |



|        |                                                                                                                                                                                                                                                           |       |    |    |    |   |
|--------|-----------------------------------------------------------------------------------------------------------------------------------------------------------------------------------------------------------------------------------------------------------|-------|----|----|----|---|
| P28474 | Alcohol dehydrogenase class 3 (EC 1.1.1.1) (Alcohol dehydrogenase class III) (Alcohol dehydrogenase 2) (S-(hydroxymethyl)glutathione dehydrogenase) (EC 1.1.1.284) (Glutathione-dependent formaldehyde dehydrogenase) (FDH) (FALDH) (Alcohol dehydrogenas | 40320 | 21 | 21 | 4  | 6 |
| Q9D305 | THAP domain-containing protein 2 - Mus musculus (Mouse)                                                                                                                                                                                                   | 25433 | 21 | 0  | 3  | 0 |
| O35286 | Putative pre-mRNA-splicing factor ATP-dependent RNA helicase DHX15 (EC 3.6.1.-) (DEAH box protein 15) - Mus musculus (Mouse)                                                                                                                              | 91748 | 21 | 0  | 15 | 0 |
| P27808 | Alpha-1,3-mannosyl-glycoprotein 2-beta-N-acetylglucosaminyltransferase (EC 2.4.1.101) (N-glycosyl-oligosaccharide-glycoprotein N-acetylglucosaminyltransferase I) (GNT-I) (GlcNAc-T I) - Mus musculus (Mouse)                                             | 51943 | 21 | 0  | 8  | 0 |
| Q8R574 | Phosphoribosyl pyrophosphate synthetase-associated protein 2 (PRPP synthetase-associated protein 2) (41 kDa phosphoribosypyrophosphate synthetase-associated protein) (PAP41) - Mus musculus (Mouse)                                                      | 41254 | 21 | 0  | 7  | 0 |
| Q9D0M1 | Phosphoribosyl pyrophosphate synthetase-associated protein 1 (PRPP synthetase-associated protein 1) (39 kDa phosphoribosypyrophosphate synthetase-associated protein) (PAP39) - Mus musculus (Mouse)                                                      | 39692 | 21 | 0  | 5  | 0 |
| P70351 | Enhancer of zeste homolog 1 (ENX-2) - Mus musculus (Mouse)                                                                                                                                                                                                | 87242 | 21 | 0  | 15 | 0 |
| Q9CZW5 | Mitochondrial precursor proteins import receptor (Translocase of outer membrane TOM70) - Mus musculus (Mouse)                                                                                                                                             | 68219 | 21 | 0  | 6  | 0 |

|        |                                                                                                                                                                                                                                       |        |    |    |    |    |
|--------|---------------------------------------------------------------------------------------------------------------------------------------------------------------------------------------------------------------------------------------|--------|----|----|----|----|
| P47934 | Carnitine O-acetyltransferase (EC 2.3.1.7) (Carnitine acetylase) (CAT) (Carnitine acetyltransferase) (CrAT) - Mus musculus (Mouse)                                                                                                    | 71335  | 21 | 0  | 8  | 0  |
| Q8BMI0 | F-box only protein 38 (Modulator of KLF7 activity) (MoKA) - Mus musculus (Mouse)                                                                                                                                                      | 135895 | 21 | 0  | 13 | 0  |
| Q6ZQF7 | Protein Jade-2 (PHD finger protein 15) - Mus musculus (Mouse)                                                                                                                                                                         | 93598  | 21 | 0  | 6  | 0  |
| Q62249 | SOX-19 protein (Fragment) - Mus musculus (Mouse)                                                                                                                                                                                      | 6858   | 21 | 0  | 5  | 0  |
| Q9ESH5 | WAP four-disulfide core domain protein 1 precursor (Prostate stromal protein ps20) (ps20 growth inhibitor) - Mus musculus (Mouse)                                                                                                     | 23806  | 21 | 0  | 8  | 0  |
| Q923Z0 | G-protein coupled receptor family C group 5 member B precursor (Retinoic acid-induced gene 2 protein) (RAIG-2) - Mus musculus (Mouse)                                                                                                 | 46382  | 21 | 0  | 2  | 0  |
| Q61315 | Adenomatous polyposis coli protein (Protein APC) (mAPC) - Mus musculus (Mouse)                                                                                                                                                        | 313179 | 21 | 22 | 30 | 25 |
| Q921G7 | Electron transfer flavoprotein-ubiquinone oxidoreductase, mitochondrial precursor (EC 1.5.5.1) (ETF-QO) (ETF-ubiquinone oxidoreductase) (ETF dehydrogenase) (Electron-transferring-flavoprotein dehydrogenase) - Mus musculus (Mouse) | 68903  | 21 | 16 | 8  | 6  |
| Q99LU0 | Charged multivesicular body protein 1b-1 (Chromatin-modifying protein 1b-1) (CHMP1b-1) - Mus musculus (Mouse)                                                                                                                         | 22167  | 21 | 0  | 10 | 0  |
| Q8R5G7 | Centaurin-delta 3 (Cnt-d3) (Arf-GAP, Rho-GAP, ankyrin repeat and pleckstrin homology domain-containing protein 3) (Dual specificity Rho- and Arf-GTPase-activating protein 1) - Mus musculus (Mouse)                                  | 171582 | 21 | 27 | 26 | 24 |
| P45448 | Orphan nuclear receptor NR5A2 (Liver receptor homolog 1) (LRH-1) - Mus musculus (Mouse)                                                                                                                                               | 64778  | 21 | 0  | 6  | 0  |
| Q9CPW7 | Zinc finger matrin-type protein 2 - Mus musculus (Mouse)                                                                                                                                                                              | 23768  | 21 | 0  | 9  | 0  |

|        |                                                                                                                                                                                                            |        |    |    |    |    |
|--------|------------------------------------------------------------------------------------------------------------------------------------------------------------------------------------------------------------|--------|----|----|----|----|
| Q3UHQ0 | AP2-associated protein kinase 1 (EC 2.7.11.1) (Adaptor-associated kinase 1) - Mus musculus (Mouse)                                                                                                         | 104024 | 21 | 0  | 11 | 0  |
| P42859 | Huntingtin (Huntington disease protein homolog) (HD protein) - Mus musculus (Mouse)                                                                                                                        | 348520 | 21 | 0  | 27 | 0  |
| Q8CBD1 | Nuclear receptor-interacting protein 1 (Nuclear factor RIP140) (Receptor-interacting protein 140) - Mus musculus (Mouse)                                                                                   | 127172 | 21 | 0  | 12 | 0  |
| Q8JZY2 | COMM domain-containing protein 10 (Down-regulated in W/WV mouse stomach 2) (mDRWMS2) - Mus musculus (Mouse)                                                                                                | 22798  | 21 | 20 | 15 | 14 |
| Q6ZPL9 | ATP-dependent RNA helicase DDX55 (EC 3.6.1.-) (DEAD box protein 55) - Mus musculus (Mouse)                                                                                                                 | 68934  | 21 | 0  | 8  | 0  |
| Q9CQ33 | Leucine-zipper-like transcriptional regulator 1 (LZTR-1) - Mus musculus (Mouse)                                                                                                                            | 95612  | 21 | 0  | 15 | 0  |
| Q9CWX9 | Probable ATP-dependent RNA helicase DDX47 (EC 3.6.1.-) (DEAD box protein 47) - Mus musculus (Mouse)                                                                                                        | 50949  | 21 | 0  | 13 | 0  |
| P70331 | MyoD family inhibitor (Myogenic repressor I-mf) - Mus musculus (Mouse)                                                                                                                                     | 26396  | 21 | 0  | 5  | 0  |
| P08122 | Collagen alpha-2(IV) chain precursor - Mus musculus (Mouse)                                                                                                                                                | 168484 | 21 | 0  | 20 | 0  |
| Q8K4S1 | 1-phosphatidylinositol-4,5-bisphosphate phosphodiesterase epsilon 1 (EC 3.1.4.11) (Phospholipase C-epsilon-1) (PLC-epsilon-1) (Phosphoinositide-specific phospholipase C epsilon-1) - Mus musculus (Mouse) | 258223 | 21 | 0  | 22 | 0  |
| Q99M11 | ELKS/RAB6-interacting/CAST family member 1 (RAB6-interacting protein 2) (ERC protein 1) (ERC1) (CAZ-associated structural protein 2) (CAST2) - Mus musculus (Mouse)                                        | 128480 | 21 | 23 | 30 | 31 |

|        |                                                                                                                                                                                                                                                           |        |    |    |    |     |
|--------|-----------------------------------------------------------------------------------------------------------------------------------------------------------------------------------------------------------------------------------------------------------|--------|----|----|----|-----|
| Q60952 | Centrosome-associated protein CEP250 (Centrosomal protein 2) (Centrosomal Nek2-associated protein 1) (C-Nap1) (Intranuclear matrix protein) - Mus musculus (Mouse)                                                                                        | 277903 | 21 | 42 | 90 | 132 |
| Q8K2P1 | Uncharacterized protein C9orf150 homolog - Mus musculus (Mouse)                                                                                                                                                                                           | 23942  | 21 | 32 | 51 | 91  |
| Q8CGK3 | Lon protease homolog, mitochondrial precursor (EC 3.4.21.-) (Lon protease-like protein) (LONP) (Mitochondrial ATP-dependent protease Lon) (Serine protease 15) - Mus musculus (Mouse)                                                                     | 106347 | 21 | 30 | 43 | 33  |
| Q8BH74 | Nuclear pore complex protein Nup107 (Nucleoporin Nup107) (107 kDa nucleoporin) - Mus musculus (Mouse)                                                                                                                                                     | 107334 | 21 | 0  | 12 | 0   |
| Q9JIQ3 | Diablo homolog, mitochondrial precursor (Second mitochondria-derived activator of caspase) (Smac protein) (Direct IAP-binding protein with low pI) - Mus musculus (Mouse)                                                                                 | 26984  | 21 | 0  | 4  | 0   |
| O55183 | Stanniocalcin-1 precursor (STC-1) - Mus musculus (Mouse)                                                                                                                                                                                                  | 28090  | 21 | 0  | 4  | 0   |
| Q6ZQ29 | Serine/threonine-protein kinase TAO2 (EC 2.7.11.1) (Thousand and one amino acid protein 2) - Mus musculus (Mouse)                                                                                                                                         | 120454 | 21 | 0  | 15 | 0   |
| Q91YN9 | BAG family molecular chaperone regulator 2 (BCL2-associated athanogene 2) (BAG-2) - Mus musculus (Mouse)                                                                                                                                                  | 23630  | 21 | 0  | 10 | 0   |
| Q9DAK3 | Rho-related BTB domain-containing protein 1 - Mus musculus (Mouse)                                                                                                                                                                                        | 80042  | 21 | 0  | 6  | 0   |
| Q9D5R3 | Coiled-coil domain-containing protein 41 - Mus musculus (Mouse)                                                                                                                                                                                           | 82176  | 21 | 0  | 15 | 0   |
| Q07113 | Cation-independent mannose-6-phosphate receptor precursor (CI Man-6-P receptor) (CI-MPR) (M6PR) (Insulin-like growth factor 2 receptor) (Insulin-like growth factor II receptor) (IGF-II receptor) (M6P/IGF2 receptor) (M6P/IGF2R) (300 kDa mannose 6-pho | 280653 | 21 | 0  | 34 | 0   |

|        |                                                                                                                                                                                                                    |        |    |    |    |    |
|--------|--------------------------------------------------------------------------------------------------------------------------------------------------------------------------------------------------------------------|--------|----|----|----|----|
| Q99NH7 | Prestin (Solute carrier family 26 member 5) - Mus musculus (Mouse)                                                                                                                                                 | 81782  | 21 | 18 | 15 | 12 |
| P51827 | AF4/FMR2 family member 3 (Protein LAF-4) (Lymphoid nuclear protein related to AF4) - Mus musculus (Mouse)                                                                                                          | 137244 | 21 | 0  | 12 | 0  |
| Q5QD17 | Trace amine-associated receptor 2 (G-protein coupled receptor 58) - Mus musculus (Mouse)                                                                                                                           | 39289  | 21 | 0  | 4  | 0  |
| P97443 | SET and MYND domain-containing protein 1 (Zinc-finger protein BOP) (m-BOP) (CD8b-opposite) - Mus musculus (Mouse)                                                                                                  | 56939  | 21 | 0  | 10 | 0  |
| Q9Z204 | Heterogeneous nuclear ribonucleoproteins C1/C2 (hnRNP C1 / hnRNP C2) - Mus musculus (Mouse)                                                                                                                        | 34421  | 21 | 15 | 14 | 8  |
| Q8CH02 | Splicing factor 4 - Mus musculus (Mouse)                                                                                                                                                                           | 72718  | 21 | 0  | 9  | 0  |
| P61750 | ADP-ribosylation factor 4 - Mus musculus (Mouse)                                                                                                                                                                   | 20498  | 21 | 56 | 2  | 8  |
| Q9CZA6 | Nuclear distribution protein nudE homolog 1 (NudE) (mNudE) - Mus musculus (Mouse)                                                                                                                                  | 38556  | 21 | 21 | 11 | 13 |
| Q6PE54 | Probable ATP-dependent RNA helicase DHX40 (EC 3.6.1.-) (DEAH box protein 40) - Mus musculus (Mouse)                                                                                                                | 89728  | 21 | 0  | 19 | 0  |
| Q810U5 | Coiled-coil domain-containing protein 50 (Protein Ymer) - Mus musculus (Mouse)                                                                                                                                     | 35471  | 21 | 22 | 9  | 11 |
| Q3UEN2 | Protein FAM35A - Mus musculus (Mouse)                                                                                                                                                                              | 101201 | 21 | 41 | 13 | 15 |
| P58043 | Sestrin-2 - Mus musculus (Mouse)                                                                                                                                                                                   | 54798  | 21 | 34 | 4  | 3  |
| P70388 | DNA repair protein RAD50 (EC 3.6.-.-) (mRad50) - Mus musculus (Mouse)                                                                                                                                              | 154533 | 21 | 0  | 33 | 0  |
| Q9EQG9 | Goodpasture antigen-binding protein (EC 2.7.11.9) (GPBP) (Collagen type IV alpha-3-binding protein) (StAR-related lipid transfer protein 11) (StARD11) (START domain-containing protein 11) - Mus musculus (Mouse) | 71751  | 21 | 14 | 9  | 5  |
| P55850 | Desmocollin-3 precursor - Mus musculus (Mouse)                                                                                                                                                                     | 101959 | 21 | 0  | 8  | 0  |

|        |                                                                                                                                                                                                                           |        |    |    |    |    |
|--------|---------------------------------------------------------------------------------------------------------------------------------------------------------------------------------------------------------------------------|--------|----|----|----|----|
| Q80TJ1 | Calcium-dependent secretion activator 1 (Calcium-dependent activator protein for secretion 1) (CAPS-1) - Mus musculus (Mouse)                                                                                             | 154030 | 21 | 16 | 20 | 10 |
| P97868 | Retinoblastoma-binding protein 6 (p53-associated cellular protein of testis) (Proliferation potential-related protein) (Protein P2P-R) - Mus musculus (Mouse)                                                             | 200492 | 21 | 29 | 24 | 35 |
| Q68FH0 | Plakophilin-4 (Armadillo-related protein) - Mus musculus (Mouse)                                                                                                                                                          | 132268 | 21 | 0  | 25 | 0  |
| Q9ERK0 | Receptor-interacting serine/threonine-protein kinase 4 (EC 2.7.11.1) (Ankyrin repeat domain protein 3) (PKC-associated protein kinase) (PKC-regulated protein kinase) - Mus musculus (Mouse)                              | 87357  | 21 | 0  | 12 | 0  |
| P29351 | Tyrosine-protein phosphatase non-receptor type 6 (EC 3.1.3.48) (Protein-tyrosine phosphatase 1C) (PTP-1C) (Hematopoietic cell protein-tyrosine phosphatase) (70Z-SHP) (SH-PTP1) (SHP-1) (PTPTY-42) - Mus musculus (Mouse) | 67859  | 21 | 0  | 7  | 0  |
| Q00651 | Integrin alpha-4 precursor (Integrin alpha-IV) (VLA-4) (Lymphocyte Peyer patch adhesion molecules subunit alpha) (LPAM subunit alpha) (CD49d antigen) - Mus musculus (Mouse)                                              | 117047 | 21 | 0  | 7  | 0  |
| Q8BVV7 | Coiled-coil domain-containing protein 45 - Mus musculus (Mouse)                                                                                                                                                           | 95497  | 21 | 0  | 9  | 0  |
| Q5STE3 | Follistatin-related protein 4 precursor (Follistatin-like 4) (m-D/Bsp120l 1-1) - Mus musculus (Mouse)                                                                                                                     | 93774  | 21 | 23 | 3  | 8  |
| P63046 | Sulfotransferase 4A1 (EC 2.8.2.-) (Brain sulfotransferase-like protein) (mBR-STL) (Nervous system sulfotransferase) (NST) - Mus musculus (Mouse)                                                                          | 33431  | 21 | 0  | 5  | 0  |

|        |                                                                                                                                                                                                           |        |    |    |    |    |
|--------|-----------------------------------------------------------------------------------------------------------------------------------------------------------------------------------------------------------|--------|----|----|----|----|
| P97929 | Breast cancer type 2 susceptibility protein homolog (Fanconi anemia group D1 protein homolog) - Mus musculus (Mouse)                                                                                      | 374766 | 21 | 23 | 41 | 39 |
| Q9D6D8 | Peptidyl-prolyl cis-trans isomerase-like 6 (EC 5.2.1.8) (PPIase) (Rotamase) (Cyclophilin-like protein PPIL6) - Mus musculus (Mouse)                                                                       | 32304  | 21 | 0  | 1  | 0  |
| Q91X58 | AN1-type zinc finger protein 2B - Mus musculus (Mouse)                                                                                                                                                    | 28847  | 21 | 0  | 5  | 0  |
| Q61125 | B1 bradykinin receptor (BK-1 receptor) (B1R) - Mus musculus (Mouse)                                                                                                                                       | 38431  | 21 | 16 | 25 | 14 |
| P11416 | Retinoic acid receptor alpha (RAR-alpha) - Mus musculus (Mouse)                                                                                                                                           | 51729  | 21 | 0  | 6  | 0  |
| P22605 | Retinoic acid receptor beta (RAR-beta) - Mus musculus (Mouse)                                                                                                                                             | 54380  | 21 | 0  | 6  | 0  |
| Q62205 | Sodium channel protein type 9 subunit alpha (Sodium channel protein type IX subunit alpha) (Voltage-gated sodium channel subunit alpha Nav1.7) (Peripheral sodium channel 1) (PN1) - Mus musculus (Mouse) | 227719 | 21 | 0  | 4  | 0  |
| O55111 | Desmoglein-2 precursor - Mus musculus (Mouse)                                                                                                                                                             | 123119 | 21 | 0  | 10 | 0  |
| Q69Z28 | ADAMTS-16 precursor (EC 3.4.24.-) (A disintegrin and metalloproteinase with thrombospondin motifs 16) (ADAM-TS 16) (ADAM-TS16) - Mus musculus (Mouse)                                                     | 140356 | 21 | 0  | 2  | 0  |
| Q9JHH6 | Carboxypeptidase B2 precursor (EC 3.4.17.20) (Carboxypeptidase U) (CPU) (Thrombin-activable fibrinolysis inhibitor) (TAFI) (Carboxypeptidase R) (CPR) - Mus musculus (Mouse)                              | 49239  | 21 | 0  | 6  | 0  |
| Q7TPD0 | Integrator complex subunit 3 (Int3) - Mus musculus (Mouse)                                                                                                                                                | 119410 | 21 | 0  | 9  | 0  |

|        |                                                                                                                                                                                                                                                           |        |    |    |    |    |
|--------|-----------------------------------------------------------------------------------------------------------------------------------------------------------------------------------------------------------------------------------------------------------|--------|----|----|----|----|
| Q9JME5 | AP-3 complex subunit beta-2 (Adapter-related protein complex 3 beta-2 subunit) (Beta3B-adaptin) (Adaptor protein complex AP-3 beta-2 subunit) (Clathrin assembly protein complex 3 beta-2 large chain) - Mus musculus (Mouse)                             | 119745 | 21 | 0  | 19 | 0  |
| Q61481 | Calcium/calmodulin-dependent 3~,5~-cyclic nucleotide phosphodiesterase 1A (EC 3.1.4.17) (Cam-PDE 1A) (61 kDa Cam-PDE) - Mus musculus (Mouse)                                                                                                              | 64658  | 21 | 30 | 3  | 6  |
| Q80WG7 | Tripartite motif-containing protein 36 (Haprin) (Acrosome RBCC protein) - Mus musculus (Mouse)                                                                                                                                                            | 84334  | 21 | 20 | 11 | 16 |
| P53996 | Cellular nucleic acid-binding protein (CNBP) (Zinc finger protein 9) - Mus musculus (Mouse)                                                                                                                                                               | 20833  | 21 | 24 | 3  | 6  |
| Q6IQX7 | Chondroitin sulfate synthase 2 (EC 2.4.1.175) (Glucuronosyl-N-acetylgalactosaminyl-proteoglycan 4-beta-N-acetylgalactosaminyltransferase II) (N-acetylgalactosaminyl-proteoglycan 3-beta-glucuronosyltransferase II) (EC 2.4.1.226) (Chondroitin glucuron | 86108  | 21 | 0  | 14 | 0  |
| Q8K2L8 | Tetratricopeptide repeat protein 15 (TPR repeat protein 15) - Mus musculus (Mouse)                                                                                                                                                                        | 88125  | 21 | 0  | 10 | 0  |
| Q80UF4 | Serologically defined colon cancer antigen 8 (Centrosomal colon cancer autoantigen protein) (mCCCAP) - Mus musculus (Mouse)                                                                                                                               | 83726  | 21 | 0  | 15 | 0  |
| Q52KR3 | BNIP2 motif-containing molecule at the C-terminal region 1 - Mus musculus (Mouse)                                                                                                                                                                         | 127352 | 21 | 22 | 10 | 7  |
| Q60765 | Cyclic AMP-dependent transcription factor ATF-3 (Activating transcription factor 3) (Transcription factor LRG-21) - Mus musculus (Mouse)                                                                                                                  | 20994  | 21 | 16 | 9  | 3  |



|        |                                                                                                                                                       |        |    |    |    |    |
|--------|-------------------------------------------------------------------------------------------------------------------------------------------------------|--------|----|----|----|----|
| Q9WTX8 | Mitotic spindle assembly checkpoint protein MAD1 (Mitotic arrest deficient-like protein 1) (MAD1-like 1) - Mus musculus (Mouse)                       | 83889  | 21 | 0  | 11 | 0  |
| Q8CHW1 | THAP domain-containing protein 1 - Mus musculus (Mouse)                                                                                               | 25052  | 21 | 0  | 3  | 0  |
| Q9D1M4 | Eukaryotic translation elongation factor 1 epsilon-1 (Multisynthetase complex auxiliary component p18) (Elongation factor p18) - Mus musculus (Mouse) | 19903  | 20 | 0  | 4  | 0  |
| O70405 | Serine/threonine-protein kinase ULK1 (EC 2.7.11.1) (Unc-51-like kinase 1) (Serine/threonine-protein kinase Unc51.1) - Mus musculus (Mouse)            | 113419 | 20 | 0  | 3  | 0  |
| Q8R124 | Kelch repeat and BTB domain-containing protein C16orf44 homolog - Mus musculus (Mouse)                                                                | 70818  | 20 | 0  | 20 | 0  |
| Q9WTU0 | PHD finger protein 2 (GRC5) - Mus musculus (Mouse)                                                                                                    | 121765 | 20 | 0  | 12 | 0  |
| Q3UH53 | Protein sidekick-1 precursor - Mus musculus (Mouse)                                                                                                   | 241468 | 20 | 23 | 22 | 21 |
| Q9D9V7 | Protein FAM116B - Mus musculus (Mouse)                                                                                                                | 67429  | 20 | 0  | 14 | 0  |
| O70157 | DNA topoisomerase 3-alpha (EC 5.99.1.2) (DNA topoisomerase III alpha) - Mus musculus (Mouse)                                                          | 114168 | 20 | 0  | 13 | 0  |
| P32067 | Lupus La protein homolog (La ribonucleoprotein) (La autoantigen homolog) - Mus musculus (Mouse)                                                       | 47898  | 20 | 0  | 16 | 0  |
| Q80YA7 | Dipeptidyl peptidase 8 (EC 3.4.14.5) (Dipeptidyl peptidase VIII) (DP8) - Mus musculus (Mouse)                                                         | 102805 | 20 | 0  | 8  | 0  |
| Q9Z1R3 | Apolipoprotein M (Apo-M) (ApoM) - Mus musculus (Mouse)                                                                                                | 21602  | 20 | 0  | 2  | 0  |
| Q6PH08 | ERC protein 2 (CAZ-associated structural protein 1) (CAST1) - Mus musculus (Mouse)                                                                    | 110742 | 20 | 0  | 31 | 0  |

|        |                                                                                                                                                                                                                                                           |        |    |    |    |    |
|--------|-----------------------------------------------------------------------------------------------------------------------------------------------------------------------------------------------------------------------------------------------------------|--------|----|----|----|----|
| Q9Z0E3 | Autoimmune regulator (Autoimmune polyendocrinopathy candidiasis ectodermal dystrophy protein homolog) (APECED protein homolog) - Mus musculus (Mouse)                                                                                                     | 60146  | 20 | 0  | 9  | 0  |
| Q924T2 | Mitochondrial 28S ribosomal protein S2 (S2mt) (MRP-S2) - Mus musculus (Mouse)                                                                                                                                                                             | 32635  | 20 | 0  | 8  | 0  |
| Q8BKF1 | DNA-directed RNA polymerase, mitochondrial precursor (EC 2.7.7.6) (MtrPOL) - Mus musculus (Mouse)                                                                                                                                                         | 137930 | 20 | 0  | 17 | 0  |
| Q05860 | Formin-1, isoforms I/II/III (Limb deformity protein) - Mus musculus (Mouse)                                                                                                                                                                               | 165020 | 20 | 0  | 14 | 0  |
| Q00422 | GA-binding protein alpha chain (GABP-subunit alpha) - Mus musculus (Mouse)                                                                                                                                                                                | 51844  | 20 | 0  | 6  | 0  |
| Q8K2M0 | 39S ribosomal protein L38, mitochondrial precursor (L38mt) (MRP-L38) - Mus musculus (Mouse)                                                                                                                                                               | 45287  | 20 | 19 | 3  | 2  |
| Q99KK9 | Probable histidyl-tRNA synthetase, mitochondrial precursor (EC 6.1.1.21) (Histidine--tRNA ligase) (HisRS) (Histidine--tRNA ligase-like) - Mus musculus (Mouse)                                                                                            | 57576  | 20 | 41 | 22 | 24 |
| Q8C9W3 | ADAMTS-2 precursor (EC 3.4.24.14) (A disintegrin and metalloproteinase with thrombospondin motifs 2) (ADAM-TS 2) (ADAM-TS2) (Procollagen I/II amino propeptide-processing enzyme) (Procollagen I N-proteinase) (PC I-NP) (Procollagen N-endopeptidase) (p | 138462 | 20 | 0  | 8  | 0  |
| Q93092 | Transaldolase (EC 2.2.1.2) - Mus musculus (Mouse)                                                                                                                                                                                                         | 37534  | 20 | 93 | 10 | 11 |
| Q9CR59 | Growth arrest and DNA-damage-inducible proteins-interacting protein 1 - Mus musculus (Mouse)                                                                                                                                                              | 25861  | 20 | 0  | 1  | 0  |
| Q5NBU5 | F-box only protein 39 - Mus musculus (Mouse)                                                                                                                                                                                                              | 53147  | 20 | 0  | 14 | 0  |
| Q69Z26 | Contactin-4 precursor (Brain-derived immunoglobulin superfamily protein 2) (BIG-2) - Mus musculus (Mouse)                                                                                                                                                 | 114217 | 20 | 0  | 9  | 0  |

|        |                                                                                                                                                                          |        |    |    |    |    |
|--------|--------------------------------------------------------------------------------------------------------------------------------------------------------------------------|--------|----|----|----|----|
| Q2VPQ9 | Uncharacterized protein C1orf149 homolog - Mus musculus (Mouse)                                                                                                          | 21636  | 20 | 0  | 5  | 0  |
| Q9D9B4 | Uncharacterized protein C10orf11 homolog - Mus musculus (Mouse)                                                                                                          | 26143  | 20 | 36 | 1  | 8  |
| Q3TMX7 | Sulfhydryl oxidase 2 precursor (EC 1.8.3.2) (Quiescin Q6-like protein 1) - Mus musculus (Mouse)                                                                          | 78467  | 20 | 0  | 7  | 0  |
| Q8R4W6 | Procollagen C-endopeptidase enhancer 2 precursor (Procollagen COOH-terminal proteinase enhancer 2) (Procollagen C-proteinase enhancer 2) (PCPE-2) - Mus musculus (Mouse) | 46291  | 20 | 0  | 8  | 0  |
| Q7TN83 | Synaptotagmin-16 (Synaptotagmin XIV-related protein) (Synaptotagmin 14-like protein) - Mus musculus (Mouse)                                                              | 71894  | 20 | 38 | 6  | 9  |
| P97950 | Ras-related protein Rab-33A (Small GTP-binding protein S10) - Mus musculus (Mouse)                                                                                       | 26980  | 20 | 0  | 3  | 0  |
| Q9JHA8 | Protein G7c precursor - Mus musculus (Mouse)                                                                                                                             | 96437  | 20 | 17 | 25 | 18 |
| Q8K136 | Sodium channel modifier 1 - Mus musculus (Mouse)                                                                                                                         | 26035  | 20 | 0  | 4  | 0  |
| P97714 | Alpha-1D adrenergic receptor (Alpha 1D-adrenoceptor) (Alpha 1D-adrenoreceptor) (Alpha-1A adrenergic receptor) - Mus musculus (Mouse)                                     | 60846  | 20 | 17 | 9  | 5  |
| Q920A7 | AFG3-like protein 1 (EC 3.4.24.-) - Mus musculus (Mouse)                                                                                                                 | 73888  | 20 | 0  | 11 | 0  |
| Q61542 | StAR-related lipid transfer protein 3 (StARD3) (START domain-containing protein 3) (Protein MLN 64) (Protein ES 64) - Mus musculus (Mouse)                               | 50780  | 20 | 0  | 19 | 0  |
| Q80U22 | RUN and SH3 domain-containing protein 2 - Mus musculus (Mouse)                                                                                                           | 163149 | 20 | 0  | 6  | 0  |
| Q8K4G2 | Collagen alpha-1(XXIII) chain - Mus musculus (Mouse)                                                                                                                     | 51843  | 20 | 0  | 5  | 0  |
| Q64152 | Transcription factor BTF3 (RNA polymerase B transcription factor 3) - Mus musculus (Mouse)                                                                               | 22017  | 20 | 0  | 5  | 0  |

|        |                                                                                                                                                              |        |    |    |    |    |
|--------|--------------------------------------------------------------------------------------------------------------------------------------------------------------|--------|----|----|----|----|
| Q05793 | Basement membrane-specific heparan sulfate proteoglycan core protein precursor (HSPG) (Perlecan) (PLC) - Mus musculus (Mouse)                                | 407847 | 20 | 0  | 24 | 0  |
| P55937 | Golgin subfamily A member 3 (Golgin-160) (Male-enhanced antigen 2) (MEA-2) - Mus musculus (Mouse)                                                            | 167574 | 20 | 0  | 23 | 0  |
| P15116 | Cadherin-2 precursor (Neural-cadherin) (N-cadherin) (CD325 antigen) - Mus musculus (Mouse)                                                                   | 100156 | 20 | 15 | 10 | 18 |
| Q148A4 | Uncharacterized protein C11orf66 homolog (Protein IIIIG9) - Mus musculus (Mouse)                                                                             | 47894  | 20 | 0  | 7  | 0  |
| Q9Z1Z2 | Serine-threonine kinase receptor-associated protein (UNR-interacting protein) - Mus musculus (Mouse)                                                         | 38774  | 20 | 14 | 8  | 4  |
| Q8CEC6 | Peptidylprolyl isomerase domain and WD repeat-containing protein 1 (EC 5.2.1.8) - Mus musculus (Mouse)                                                       | 73954  | 20 | 21 | 12 | 11 |
| Q80VH0 | B-cell scaffold protein with ankyrin repeats (Protein AVIEF) - Mus musculus (Mouse)                                                                          | 90060  | 20 | 21 | 14 | 15 |
| Q61818 | Retinoic acid-induced protein 1 - Mus musculus (Mouse)                                                                                                       | 204311 | 20 | 0  | 15 | 0  |
| P54923 | [Protein ADP-ribosylarginine] hydrolase (EC 3.2.2.19) (ADP-ribosylarginine hydrolase) (ADP-ribose-L-arginine cleaving enzyme) - Mus musculus (Mouse)         | 40328  | 20 | 41 | 15 | 12 |
| Q91ZR2 | Sorting nexin-18 (Sorting nexin-associated Golgi protein 1) - Mus musculus (Mouse)                                                                           | 68204  | 20 | 23 | 11 | 12 |
| Q60865 | GPI-anchored membrane protein 1 (GPI-anchored protein p137) (p137GPI) - Mus musculus (Mouse)                                                                 | 73674  | 20 | 26 | 5  | 5  |
| Q9Z0R6 | Intersectin-2 (SH3 domain-containing protein 1B) (EH and SH3 domains protein 2) (EH domain and SH3 domain regulator of endocytosis 2) - Mus musculus (Mouse) | 189571 | 20 | 0  | 25 | 0  |
| Q99MX0 | Transketolase-like protein 1 (EC 2.2.1.1) (Transketolase 2) (TK 2) - Mus musculus (Mouse)                                                                    | 66371  | 20 | 0  | 55 | 0  |

|        |                                                                                                                                                                                                                  |        |    |     |    |    |
|--------|------------------------------------------------------------------------------------------------------------------------------------------------------------------------------------------------------------------|--------|----|-----|----|----|
| Q99MT7 | Probable G-protein coupled receptor 87 - Mus musculus (Mouse)                                                                                                                                                    | 42014  | 20 | 0   | 9  | 0  |
| Q8CDI2 | F-box only protein 43 (Endogenous meiotic inhibitor 2) - Mus musculus (Mouse)                                                                                                                                    | 72210  | 20 | 0   | 9  | 0  |
| Q5GIG6 | Serine/threonine-protein kinase TNNI3K (EC 2.7.11.1) (TNNI3-interacting kinase) (Cardiac ankyrin repeat kinase) - Mus musculus (Mouse)                                                                           | 93840  | 20 | 0   | 5  | 0  |
| Q8BL66 | Early endosome antigen 1 - Mus musculus (Mouse)                                                                                                                                                                  | 161958 | 20 | 24  | 48 | 51 |
| Q9Z2I8 | Succinyl-CoA ligase [GDP-forming] beta-chain, mitochondrial precursor (EC 6.2.1.4) (Succinyl-CoA synthetase, betaG chain) (SCS-betaG) (GTP-specific succinyl-CoA synthetase subunit beta) - Mus musculus (Mouse) | 47096  | 20 | 0   | 7  | 0  |
| Q9JIP4 | Pannexin-1 - Mus musculus (Mouse)                                                                                                                                                                                | 48792  | 20 | 40  | 12 | 6  |
| Q9R1P3 | Proteasome subunit beta type 2 (EC 3.4.25.1) (Proteasome component C7-l) (Macropain subunit C7-l) (Multicatalytic endopeptidase complex subunit C7-l) - Mus musculus (Mouse)                                     | 23063  | 20 | 103 | 3  | 7  |
| Q9JJK8 | Serine/threonine-protein kinase ATR (EC 2.7.11.1) (Ataxia telangiectasia and Rad3-related protein) - Mus musculus (Mouse)                                                                                        | 303338 | 20 | 25  | 72 | 62 |
| Q8BU03 | Periodic tryptophan protein 2 homolog - Mus musculus (Mouse)                                                                                                                                                     | 103814 | 20 | 0   | 21 | 0  |
| Q8BIL5 | Hook homolog 1 - Mus musculus (Mouse)                                                                                                                                                                            | 84956  | 20 | 14  | 13 | 16 |
| Q8CI04 | Conserved oligomeric Golgi complex component 3 - Mus musculus (Mouse)                                                                                                                                            | 94136  | 20 | 0   | 13 | 0  |
| P31786 | Acyl-CoA-binding protein (ACBP) (Diazepam-binding inhibitor) (DBI) (Endozepine) (EP) - Mus musculus (Mouse)                                                                                                      | 9994   | 20 | 0   | 3  | 0  |
| Q60652 | Killer cell lectin-like receptor 5 (T-cell surface glycoprotein Ly-49E) (Lymphocyte antigen 49e) (Ly-49e) - Mus musculus (Mouse)                                                                                 | 31507  | 20 | 0   | 2  | 0  |

|        |                                                                                                                                                                  |        |    |    |    |    |
|--------|------------------------------------------------------------------------------------------------------------------------------------------------------------------|--------|----|----|----|----|
| Q91YN0 | Uncharacterized protein C12orf4 homolog - Mus musculus (Mouse)                                                                                                   | 64345  | 20 | 0  | 3  | 0  |
| Q924C1 | Exportin-5 (Exp5) (Ran-binding protein 21) - Mus musculus (Mouse)                                                                                                | 139050 | 20 | 62 | 15 | 13 |
| Q7TQ07 | DNA polymerase nu (EC 2.7.7.7) - Mus musculus (Mouse)                                                                                                            | 97640  | 20 | 39 | 14 | 18 |
| Q9R0C8 | Protein vav-3 - Mus musculus (Mouse)                                                                                                                             | 99103  | 20 | 0  | 13 | 0  |
| Q8K2V1 | Serine/threonine-protein phosphatase 4 regulatory subunit 1 - Mus musculus (Mouse)                                                                               | 107884 | 20 | 18 | 11 | 10 |
| Q64511 | DNA topoisomerase 2-beta (EC 5.99.1.3) (DNA topoisomerase II, beta isozyme) - Mus musculus (Mouse)                                                               | 182707 | 20 | 22 | 20 | 21 |
| P35486 | Pyruvate dehydrogenase E1 component alpha subunit, somatic form, mitochondrial precursor (EC 1.2.4.1) (PDHE1-A type I) - Mus musculus (Mouse)                    | 43888  | 20 | 0  | 11 | 0  |
| P61315 | Galactose-3-O-sulfotransferase 3 (EC 2.8.2.-) (Galbeta1-3GalNAc 3~sulfotransferase) (Beta-galactose-3-O-sulfotransferase 3) - Mus musculus (Mouse)               | 49702  | 20 | 0  | 10 | 0  |
| Q8CJG0 | Eukaryotic translation initiation factor 2C 2 (eIF2C 2) (eIF-2C 2) (Argonaute-2) (Slicer protein) (Piwi/argonaute family protein mEIF2C2) - Mus musculus (Mouse) | 98458  | 20 | 0  | 10 | 0  |
| Q9D7P9 | Serpin B12 - Mus musculus (Mouse)                                                                                                                                | 48261  | 20 | 0  | 3  | 0  |
| P11862 | Growth-arrest-specific protein 2 (GAS-2) - Mus musculus (Mouse)                                                                                                  | 35505  | 20 | 0  | 10 | 0  |
| P16277 | Tyrosine-protein kinase BLK (EC 2.7.10.2) (B lymphocyte kinase) (p55-BLK) - Mus musculus (Mouse)                                                                 | 57064  | 20 | 16 | 14 | 13 |

|        |                                                                                                                                                                                                                                           |        |    |    |    |    |
|--------|-------------------------------------------------------------------------------------------------------------------------------------------------------------------------------------------------------------------------------------------|--------|----|----|----|----|
| P18654 | Ribosomal protein S6 kinase alpha-3 (EC 2.7.11.1) (S6K-alpha 3) (90 kDa ribosomal protein S6 kinase 3) (p90-RSK 3) (Ribosomal S6 kinase 2) (RSK-2) (pp90RSK2) (MAP kinase-activated protein kinase 1b) (MAPKAPK1B) - Mus musculus (Mouse) | 83983  | 20 | 0  | 15 | 0  |
| Q9JI74 | Kelch-like protein 1 - Mus musculus (Mouse)                                                                                                                                                                                               | 84019  | 20 | 0  | 20 | 0  |
| Q61188 | Enhancer of zeste homolog 2 (ENX-1) - Mus musculus (Mouse)                                                                                                                                                                                | 87277  | 20 | 0  | 22 | 0  |
| Q9JHS4 | ATP-dependent Clp protease ATP-binding subunit ClpX-like, mitochondrial precursor - Mus musculus (Mouse)                                                                                                                                  | 70069  | 20 | 17 | 17 | 10 |
| Q8K314 | Rab effector MyRIP (Myosin-VIIa- and Rab-interacting protein) (Exophilin-8) (Slp homolog lacking C2 domains c) - Mus musculus (Mouse)                                                                                                     | 96062  | 20 | 0  | 6  | 0  |
| O55047 | Serine/threonine-protein kinase tousled-like 2 (EC 2.7.11.1) (Tousled-like kinase 2) - Mus musculus (Mouse)                                                                                                                               | 83008  | 20 | 0  | 13 | 0  |
| O08644 | Ephrin type-B receptor 6 precursor (Tyrosine-protein kinase-defective receptor EPH-6) (MEP) - Mus musculus (Mouse)                                                                                                                        | 111520 | 20 | 0  | 57 | 0  |
| O35600 | Retinal-specific ATP-binding cassette transporter (ATP-binding cassette sub-family A member 4) (RIM ABC transporter) (RIM protein) (RmP) - Mus musculus (Mouse)                                                                           | 262323 | 20 | 16 | 21 | 18 |
| P84104 | Splicing factor, arginine/serine-rich 3 (Pre-mRNA-splicing factor SRP20) (X16 protein) - Mus musculus (Mouse)                                                                                                                             | 19546  | 20 | 0  | 14 | 0  |
| Q8BL97 | Splicing factor, arginine/serine-rich 7 - Mus musculus (Mouse)                                                                                                                                                                            | 31027  | 20 | 0  | 4  | 0  |
| Q3URD3 | Sarcolemmal membrane-associated protein (Sarcolemmal-associated protein) - Mus musculus (Mouse)                                                                                                                                           | 97729  | 20 | 17 | 18 | 26 |

|        |                                                                                                                                                                                                    |        |    |    |    |    |
|--------|----------------------------------------------------------------------------------------------------------------------------------------------------------------------------------------------------|--------|----|----|----|----|
| Q9D2Z4 | Sentrin-specific protease 8 (EC 3.4.22.-) (Sentrin/SUMO-specific protease SENP8) (NEDD8-specific protease 1) (Deneddylase-1) - Mus musculus (Mouse)                                                | 25441  | 20 | 0  | 2  | 0  |
| Q9Z1S0 | Mitotic checkpoint serine/threonine-protein kinase BUB1 beta (EC 2.7.11.1) (MAD3/BUB1-related protein kinase) (Mitotic checkpoint kinase MAD3L) - Mus musculus (Mouse)                             | 119299 | 20 | 41 | 15 | 23 |
| Q99LJ7 | RCC1 and BTB domain-containing protein 2 (Regulator of chromosome condensation and BTB domain-containing protein 2) (Chromosome condensation 1-like) - Mus musculus (Mouse)                        | 61323  | 20 | 0  | 4  | 0  |
| P36916 | Guanine nucleotide-binding protein-like 1 (GTP-binding protein MMR1) - Mus musculus (Mouse)                                                                                                        | 48081  | 20 | 18 | 13 | 4  |
| Q9Z2C9 | Myotubularin-related protein 7 (EC 3.1.3.-) - Mus musculus (Mouse)                                                                                                                                 | 76587  | 20 | 0  | 7  | 0  |
| Q8BU14 | Translocation protein SEC62 (Translocation protein 1) (TP-1) - Mus musculus (Mouse)                                                                                                                | 45894  | 20 | 16 | 3  | 4  |
| P35492 | Histidine ammonia-lyase (EC 4.3.1.3) (Histidase) - Mus musculus (Mouse)                                                                                                                            | 72897  | 20 | 16 | 6  | 4  |
| Q91WM3 | U3 small nucleolar RNA-interacting protein 2 (U3 small nucleolar ribonucleoprotein-associated 55 kDa protein) (U3 snoRNP-associated 55 kDa protein) (U3-55K) (RRP9 homolog) - Mus musculus (Mouse) | 52645  | 20 | 0  | 9  | 0  |
| Q8CC12 | Codanin-1 (Fragment) - Mus musculus (Mouse)                                                                                                                                                        | 52229  | 20 | 22 | 7  | 8  |
| Q9D0M0 | Exosome complex exonuclease RRP42 (EC 3.1.13.-) (Ribosomal RNA-processing protein 42) (Exosome component 7) - Mus musculus (Mouse)                                                                 | 32329  | 20 | 0  | 11 | 0  |



|        |                                                                                                                                                                                                                                                           |        |    |    |     |     |
|--------|-----------------------------------------------------------------------------------------------------------------------------------------------------------------------------------------------------------------------------------------------------------|--------|----|----|-----|-----|
| Q9Z1J1 | Transcription factor 7-like 1 (HMG box transcription factor 3) (TCF-3) (mTCF-3) - Mus musculus (Mouse)                                                                                                                                                    | 62431  | 20 | 0  | 3   | 0   |
| Q8CGB3 | Uveal autoantigen with coiled-coil domains and ankyrin repeats protein (Nucling) (Nuclear membrane-binding protein) - Mus musculus (Mouse)                                                                                                                | 161969 | 20 | 21 | 33  | 43  |
| Q8C6B2 | Rhotekin - Mus musculus (Mouse)                                                                                                                                                                                                                           | 63742  | 20 | 0  | 14  | 0   |
| Q60749 | KH domain-containing, RNA-binding, signal transduction-associated protein 1 (p21 Ras GTPase-activating protein-associated p62) (GAP-associated tyrosine phosphoprotein p62) (Src-associated in mitosis 68 kDa protein) (Sam68) (p68) - Mus musculus (Mous | 48511  | 20 | 0  | 6   | 0   |
| Q6PGC1 | Putative ATP-dependent RNA helicase DHX29 (EC 3.6.1.-) (DEAH box protein 29) - Mus musculus (Mouse)                                                                                                                                                       | 155020 | 20 | 0  | 20  | 0   |
| Q8K2W3 | Thioredoxin domain-containing protein 11 - Mus musculus (Mouse)                                                                                                                                                                                           | 107146 | 20 | 19 | 13  | 14  |
| Q99KQ4 | Nicotinamide phosphoribosyltransferase (EC 2.4.2.12) (NAmPRTase) (Nampt) (Pre-B-cell colony-enhancing factor 1 homolog) (PBEF) (Visfatin) - Mus musculus (Mouse)                                                                                          | 55698  | 20 | 0  | 9   | 0   |
| Q8BR76 | Meckelin (Meckel syndrome type 3 protein homolog) (Transmembrane protein 67) - Mus musculus (Mouse)                                                                                                                                                       | 113506 | 20 | 0  | 13  | 0   |
| Q7TQP2 | Probable G-protein coupled receptor 135 - Mus musculus (Mouse)                                                                                                                                                                                            | 50184  | 20 | 0  | 5   | 0   |
| Q61245 | Collagen alpha-1(XI) chain precursor - Mus musculus (Mouse)                                                                                                                                                                                               | 181480 | 20 | 20 | 197 | 233 |
| Q01755 | Testis-specific protein PBS13 - Mus musculus (Mouse)                                                                                                                                                                                                      | 62388  | 20 | 0  | 18  | 0   |

|        |                                                                                                                                                                            |        |    |    |     |     |
|--------|----------------------------------------------------------------------------------------------------------------------------------------------------------------------------|--------|----|----|-----|-----|
| Q6NZQ8 | E3 ubiquitin-protein ligase MARCH1 (EC 6.3.2.-) (Membrane-associated RING finger protein 1) (Membrane-associated RING-CH protein 1) (MARCH-1) - Mus musculus (Mouse)       | 33239  | 20 | 0  | 5   | 0   |
| Q3UHD1 | Brain-specific angiogenesis inhibitor 1 precursor - Mus musculus (Mouse)                                                                                                   | 176664 | 20 | 0  | 19  | 0   |
| Q09163 | Delta-like protein precursor (DLK) (Preadipocyte factor 1) (Pref-1) (Adipocyte differentiation inhibitor protein) [Contains: Fetal antigen 1 (FA1)] - Mus musculus (Mouse) | 43459  | 20 | 0  | 11  | 0   |
| Q61083 | Mitogen-activated protein kinase kinase kinase 2 (EC 2.7.11.25) (MAPK/ERK kinase kinase 2) (MEK kinase 2) (MEKK 2) - Mus musculus (Mouse)                                  | 69872  | 20 | 18 | 204 | 253 |
| Q9D5Y1 | Coiled-coil domain-containing protein 39 - Mus musculus (Mouse)                                                                                                            | 110460 | 20 | 0  | 16  | 0   |
| Q64518 | Sarcoplasmic/endoplasmic reticulum calcium ATPase 3 (EC 3.6.3.8) (Calcium pump 3) (SERCA3) (SR Ca(2+)-ATPase 3) - Mus musculus (Mouse)                                     | 114961 | 20 | 0  | 16  | 0   |
| Q920B0 | FERM domain-containing protein 4B (GRP1-binding protein GRSP1) (Golgi-associated band 4.1-like protein) (GOBLIN) - Mus musculus (Mouse)                                    | 112125 | 20 | 18 | 10  | 11  |
| Q9CZT5 | Vasorin precursor (Protein Slit-like 2) - Mus musculus (Mouse)                                                                                                             | 73356  | 20 | 0  | 7   | 0   |
| Q923M0 | Protein phosphatase 1 regulatory subunit 16A (Myosin phosphatase targeting subunit 3) - Mus musculus (Mouse)                                                               | 58121  | 20 | 20 | 9   | 9   |
| Q8BQY8 | Checkpoint protein HUS1 (mHUS1) - Mus musculus (Mouse)                                                                                                                     | 32173  | 20 | 0  | 7   | 0   |
| Q62108 | Discs large homolog 4 (Postsynaptic density protein 95) (PSD-95) (Synapse-associated protein 90) (SAP90) - Mus musculus (Mouse)                                            | 80765  | 20 | 0  | 9   | 0   |
| Q80YR4 | Zinc finger protein 598 - Mus musculus (Mouse)                                                                                                                             | 101125 | 20 | 0  | 10  | 0   |

|        |                                                                                                                                                                                                      |        |    |    |    |     |
|--------|------------------------------------------------------------------------------------------------------------------------------------------------------------------------------------------------------|--------|----|----|----|-----|
| P52431 | DNA polymerase delta catalytic subunit (EC 2.7.7.7) - Mus musculus (Mouse)                                                                                                                           | 125188 | 20 | 21 | 22 | 21  |
| P51557 | Steroidogenic acute regulatory protein, mitochondrial precursor (StAR) (StARD1) (Luteinizing hormone-induced protein) - Mus musculus (Mouse)                                                         | 31891  | 20 | 0  | 8  | 0   |
| Q7TNS7 | Amiloride-sensitive cation channel 4 (Acid-sensing ion channel 4) - Mus musculus (Mouse)                                                                                                             | 60262  | 20 | 28 | 6  | 3   |
| Q8BRH4 | Myeloid/lymphoid or mixed-lineage leukemia protein 3 homolog (EC 2.1.1.43) (Histone-lysine N-methyltransferase, H3 lysine-4 specific MLL3) - Mus musculus (Mouse)                                    | 547487 | 20 | 15 | 47 | 37  |
| Q91YA2 | Serine/threonine-protein kinase H1 (EC 2.7.11.1) (PSK-H1) - Mus musculus (Mouse)                                                                                                                     | 48407  | 20 | 0  | 4  | 0   |
| O89053 | Coronin-1A (Coronin-like protein p57) (Coronin-like protein A) (Clipin-A) (Tryptophan aspartate-containing coat protein) (TACO) - Mus musculus (Mouse)                                               | 51641  | 20 | 39 | 47 | 114 |
| Q9EPL9 | Acyl-coenzyme A oxidase 3, peroxisomal (EC 1.3.3.6) (Pristanoyl-CoA oxidase) (Branched-chain acyl-CoA oxidase) (BRCACox) - Mus musculus (Mouse)                                                      | 79230  | 20 | 26 | 13 | 6   |
| P59438 | Hermansky-Pudlak syndrome 5 protein homolog (Ruby-eye protein 2) (Ru2) - Mus musculus (Mouse)                                                                                                        | 127995 | 20 | 0  | 8  | 0   |
| P49312 | Heterogeneous nuclear ribonucleoprotein A1 (Helix-destabilizing protein) (Single-strand-binding protein) (hnRNP core protein A1) (HDP-1) (Topoisomerase-inhibitor suppressed) - Mus musculus (Mouse) | 34289  | 20 | 0  | 3  | 0   |

|        |                                                                                                                                                                                                                                    |        |    |    |    |    |
|--------|------------------------------------------------------------------------------------------------------------------------------------------------------------------------------------------------------------------------------------|--------|----|----|----|----|
| Q64311 | Protein N-terminal asparagine amidohydrolase (EC 3.5.1.-) (Protein NH2-terminal asparagine deamidase) (N-terminal Asn amidase) (NTN-amidase) (PNAD) (Protein NH2-terminal asparagine amidohydrolase) (PNAA) - Mus musculus (Mouse) | 34916  | 20 | 26 | 8  | 9  |
| Q8BW10 | RNA-binding protein NOB1 - Mus musculus (Mouse)                                                                                                                                                                                    | 45834  | 20 | 0  | 3  | 0  |
| Q91YU6 | Leucine zipper putative tumor suppressor 2 - Mus musculus (Mouse)                                                                                                                                                                  | 73211  | 20 | 0  | 7  | 0  |
| P62881 | Guanine nucleotide-binding protein subunit beta 5 (Transducin beta chain 5) (Gbeta5) - Mus musculus (Mouse)                                                                                                                        | 44620  | 20 | 0  | 2  | 0  |
| Q00724 | Plasma retinol-binding protein precursor (PRBP) (RBP) - Mus musculus (Mouse)                                                                                                                                                       | 23533  | 19 | 14 | 2  | 2  |
| Q99MY8 | Probable histone-lysine N-methyltransferase ASH1L (EC 2.1.1.43) (ASH1-like protein) (Absent small and homeotic disks protein 1 homolog) - Mus musculus (Mouse)                                                                     | 334635 | 19 | 31 | 46 | 35 |
| Q60943 | Interleukin-17 receptor A precursor (IL-17 receptor) (CD217 antigen) - Mus musculus (Mouse)                                                                                                                                        | 99342  | 19 | 0  | 7  | 0  |
| Q9D0F3 | ERGIC-53 protein precursor (ER-Golgi intermediate compartment 53 kDa protein) (Lectin, mannose-binding 1) (p58) - Mus musculus (Mouse)                                                                                             | 58038  | 19 | 15 | 2  | 4  |
| Q88398 | Advillin (p92) (Actin-binding protein DOC6) - Mus musculus (Mouse)                                                                                                                                                                 | 92470  | 19 | 0  | 10 | 0  |
| Q61210 | Rho guanine nucleotide exchange factor 1 (Lymphoid blast crisis-like 2) (Lbc~s second cousin) - Mus musculus (Mouse)                                                                                                               | 103368 | 19 | 0  | 9  | 0  |
| Q8BXC6 | COMM domain-containing protein 2 - Mus musculus (Mouse)                                                                                                                                                                            | 22891  | 19 | 0  | 2  | 0  |
| Q60934 | Glutamate receptor, ionotropic kainate 1 precursor (Glutamate receptor 5) (GluR-5) (GluR5) - Mus musculus (Mouse)                                                                                                                  | 95768  | 19 | 17 | 68 | 96 |

|        |                                                                                                                                   |        |    |    |    |    |
|--------|-----------------------------------------------------------------------------------------------------------------------------------|--------|----|----|----|----|
| Q35382 | Exocyst complex component 4 (Exocyst complex component Sec8) - Mus musculus (Mouse)                                               | 111273 | 19 | 0  | 14 | 0  |
| Q8R3Q0 | Transmembrane protein 66 precursor - Mus musculus (Mouse)                                                                         | 36347  | 19 | 0  | 7  | 0  |
| Q62270 | Tyrosine-protein kinase Srms (EC 2.7.10.2) (PTK70) - Mus musculus (Mouse)                                                         | 56350  | 19 | 0  | 6  | 0  |
| Q9WVM1 | Rac GTPase-activating protein 1 (MgcRacGAP) - Mus musculus (Mouse)                                                                | 70856  | 19 | 0  | 9  | 0  |
| Q60974 | Nuclear receptor corepressor 1 (N-CoR1) (N-CoR) (Retinoid X receptor-interacting protein 13) (RIP13) - Mus musculus (Mouse)       | 271503 | 19 | 17 | 36 | 40 |
| Q3U269 | Uncharacterized protein C9orf97 homolog - Mus musculus (Mouse)                                                                    | 56834  | 19 | 0  | 4  | 0  |
| P59048 | p53 and DNA damage-regulated protein 1 - Mus musculus (Mouse)                                                                     | 15429  | 19 | 15 | 9  | 8  |
| Q80XB4 | Nebulin-related-anchoring protein (N-RAP) - Mus musculus (Mouse)                                                                  | 196735 | 19 | 0  | 26 | 0  |
| Q9D4H4 | Angiotensin-like protein 1 - Mus musculus (Mouse)                                                                                 | 98706  | 19 | 21 | 30 | 65 |
| Q8K371 | Angiotensin-like protein 2 - Mus musculus (Mouse)                                                                                 | 85454  | 19 | 21 | 31 | 64 |
| Q9D2H2 | Putative adenylate kinase 7 (EC 2.7.4.3) - Mus musculus (Mouse)                                                                   | 71087  | 19 | 0  | 13 | 0  |
| Q91WT4 | DnaJ homolog subfamily C member 17 - Mus musculus (Mouse)                                                                         | 34591  | 19 | 21 | 32 | 66 |
| Q9D0I4 | Syntaxin-17 - Mus musculus (Mouse)                                                                                                | 33372  | 19 | 20 | 3  | 5  |
| P51944 | G2/mitotic-specific cyclin-F - Mus musculus (Mouse)                                                                               | 88147  | 19 | 24 | 8  | 9  |
| Q3UMR0 | Ankyrin repeat domain-containing protein 27 (VPS9-ankyrin-repeat protein) (VPS9 domain-containing protein) - Mus musculus (Mouse) | 118674 | 19 | 0  | 7  | 0  |
| Q8BVH9 | Methyltransferase-like protein 6 (EC 2.1.1.-) - Mus musculus (Mouse)                                                              | 33165  | 19 | 0  | 5  | 0  |
| Q8BT07 | Centrosomal protein of 55 kDa - Mus musculus (Mouse)                                                                              | 54239  | 19 | 0  | 14 | 0  |

|        |                                                                                                                                                                                                                   |        |    |    |    |    |
|--------|-------------------------------------------------------------------------------------------------------------------------------------------------------------------------------------------------------------------|--------|----|----|----|----|
| Q99K95 | Uncharacterized protein C20orf43 homolog - Mus musculus (Mouse)                                                                                                                                                   | 34655  | 19 | 0  | 8  | 0  |
| Q923D2 | Flavin reductase (EC 1.5.1.30) (FR) (NADPH-dependent diaphorase) (NADPH-flavin reductase) (FLR) (Biliverdin reductase B) (EC 1.3.1.24) (BVRB) (Biliverdin-IX beta-reductase) - Mus musculus (Mouse)               | 22297  | 19 | 24 | 3  | 5  |
| O88932 | ATP-sensitive inward rectifier potassium channel 15 (Potassium channel, inwardly rectifying subfamily J member 15) (Inward rectifier K(+) channel Kir4.2) - Mus musculus                                          | 43034  | 19 | 0  | 3  | 0  |
| Q9WTL4 | Insulin receptor-related protein precursor (EC 2.7.10.1) (IRR) (IR-related receptor) [Contains: Insulin receptor-related protein alpha chain; Insulin receptor-related protein beta chain] - Mus musculus (Mouse) | 147162 | 19 | 0  | 80 | 0  |
| P19182 | Interferon-related developmental regulator 1 (Nerve growth factor-inducible protein PC4) (TPA-induced sequence 7) (TIS7 protein) - Mus musculus (Mouse)                                                           | 50653  | 19 | 0  | 12 | 0  |
| Q8VI38 | Globoside alpha-1,3-N-acetylgalactosaminyltransferase 1 (EC 2.4.1.88) (Forssman glycolipid synthetase) - Mus musculus (Mouse)                                                                                     | 40714  | 19 | 19 | 6  | 5  |
| Q8BHN1 | Gamma-taxilin - Mus musculus (Mouse)                                                                                                                                                                              | 60841  | 19 | 20 | 19 | 27 |
| P53995 | Anaphase-promoting complex subunit 1 (APC1) (Cyclosome subunit 1) (Protein Tsg24) (Mitotic checkpoint regulator) - Mus musculus (Mouse)                                                                           | 218343 | 19 | 0  | 24 | 0  |
| Q9CQU5 | ZW10 interactor (ZW10-interacting protein 1) (Zwint-1) - Mus musculus (Mouse)                                                                                                                                     | 28866  | 19 | 23 | 9  | 16 |
| Q80ZI6 | E3 ubiquitin-protein ligase LRSAM1 (EC 6.3.2.-) (Leucine-rich repeat and sterile alpha motif-containing protein 1) (Tsg101-associated ligase) - Mus musculus (Mouse)                                              | 85007  | 19 | 35 | 19 | 15 |

|        |                                                                                                                                                                   |        |    |    |    |    |
|--------|-------------------------------------------------------------------------------------------------------------------------------------------------------------------|--------|----|----|----|----|
| P50992 | Potassium-transporting ATPase subunit beta (Proton pump beta chain) (Gastric H(+)/K(+) ATPase beta subunit) - Mus musculus (Mouse)                                | 34058  | 19 | 0  | 4  | 0  |
| P80560 | Receptor-type tyrosine-protein phosphatase N2 precursor (EC 3.1.3.48) (R-PTP-N2) (PTP IA-2beta) (Protein tyrosine phosphatase-NP) (PTP-NP) - Mus musculus (Mouse) | 112284 | 19 | 18 | 26 | 18 |
| Q3THK3 | Transcription initiation factor IIF subunit alpha (EC 2.7.11.1) (TFIIF-alpha) (General transcription factor IIF subunit 1) - Mus musculus (Mouse)                 | 57268  | 19 | 0  | 4  | 0  |
| P62862 | 40S ribosomal protein S30 - Mus musculus (Mouse)                                                                                                                  | 6644   | 19 | 0  | 1  | 0  |
| P28825 | Meprin A subunit alpha precursor (EC 3.4.24.18) (Endopeptidase-2) (MEP-1) - Mus musculus (Mouse)                                                                  | 85227  | 19 | 0  | 6  | 0  |
| P02469 | Laminin subunit beta-1 precursor (Laminin B1 chain) - Mus musculus (Mouse)                                                                                        | 204018 | 19 | 0  | 19 | 0  |
| Q9EPQ1 | Toll-like receptor 1 precursor (Toll/interleukin-1 receptor-like protein) (TIL) (CD281 antigen) - Mus musculus (Mouse)                                            | 91812  | 19 | 18 | 42 | 65 |
| Q5U458 | DnaJ homolog subfamily C member 11 - Mus musculus (Mouse)                                                                                                         | 63550  | 19 | 18 | 15 | 13 |
| Q91W86 | Vacuolar protein sorting-associated protein 11 - Mus musculus (Mouse)                                                                                             | 109013 | 19 | 0  | 19 | 0  |
| Q9D9J7 | Izumo sperm-egg fusion protein 1 precursor (Sperm-specific protein izumo) - Mus musculus (Mouse)                                                                  | 45541  | 19 | 0  | 6  | 0  |
| Q91WF3 | Adenylate cyclase type 4 (EC 4.6.1.1) (Adenylate cyclase type IV) (ATP pyrophosphate-lyase 4) (Adenylyl cyclase 4) - Mus musculus (Mouse)                         | 121785 | 19 | 0  | 12 | 0  |
| Q61647 | Hyaluronan synthase 1 (EC 2.4.1.212) (Hyaluronate synthase 1) (Hyaluronic acid synthase 1) (HA synthase 1) - Mus musculus (Mouse)                                 | 66358  | 19 | 0  | 22 | 0  |

|        |                                                                                                                                                            |        |    |    |    |    |
|--------|------------------------------------------------------------------------------------------------------------------------------------------------------------|--------|----|----|----|----|
| Q9QYJ3 | DnaJ homolog subfamily B member 1 (Heat shock 40 kDa protein 1) (Heat shock protein 40) (HSP40) - Mus musculus (Mouse)                                     | 38314  | 19 | 0  | 7  | 0  |
| P56475 | Gamma-aminobutyric-acid receptor subunit rho-1 precursor (GABA(A) receptor subunit rho-1) - Mus musculus (Mouse)                                           | 55006  | 19 | 0  | 7  | 0  |
| Q80ZM7 | Putative transcription initiation factor IIA gamma chain (TFIIA P12 subunit) (TFIIA-12) (TFIIAS) (TFIIA-gamma) - Mus musculus (Mouse)                      | 12579  | 19 | 0  | 1  | 0  |
| Q9QVY8 | Retinoic acid-induced protein 2 (3f8) - Mus musculus (Mouse)                                                                                               | 57427  | 19 | 22 | 11 | 5  |
| Q80Y44 | Probable ATP-dependent RNA helicase DDX10 (EC 3.6.1.-) (DEAD box protein 10) - Mus musculus (Mouse)                                                        | 101133 | 19 | 16 | 19 | 15 |
| Q8K4C2 | Interleukin-17 receptor C precursor (IL-17 receptor C) (IL-17RC) (Interleukin-17 receptor-like protein) (IL-17RL) - Mus musculus (Mouse)                   | 75978  | 19 | 0  | 8  | 0  |
| Q8BM13 | Noelin-2 precursor (Olfactomedin-2) - Mus musculus (Mouse)                                                                                                 | 51007  | 19 | 0  | 9  | 0  |
| Q9QY76 | Vesicle-associated membrane protein-associated protein B (VAMP-associated protein B) (VAMP-associated protein 33b) (VAMP-B) (VAP-B) - Mus musculus (Mouse) | 27157  | 19 | 23 | 5  | 6  |
| O08672 | Kinesin-like protein KIFC2 - Mus musculus (Mouse)                                                                                                          | 86488  | 19 | 17 | 15 | 7  |
| Q62351 | Transferrin receptor protein 1 (TfR1) (TR) (TfR) (Trfr) (CD71 antigen) - Mus musculus (Mouse)                                                              | 86076  | 19 | 0  | 3  | 0  |
| P16283 | Anion exchange protein 3 (Neuronal band 3-like protein) (Solute carrier family 4 member 3) - Mus musculus (Mouse)                                          | 135593 | 19 | 0  | 19 | 0  |
| Q9JHK0 | Placental prolactin-like protein M precursor (PRL-like protein M) (PLP-M) - Mus musculus (Mouse)                                                           | 25993  | 19 | 0  | 4  | 0  |



|        |                                                                                                                                                                                              |        |    |    |    |    |
|--------|----------------------------------------------------------------------------------------------------------------------------------------------------------------------------------------------|--------|----|----|----|----|
| Q9EQZ7 | Regulating synaptic membrane exocytosis protein 2 (Rab3-interacting molecule 2) (RIM 2) (Rab3-interacting protein 2) - Mus musculus (Mouse)                                                  | 173669 | 19 | 0  | 21 | 0  |
| Q921L3 | Transmembrane and coiled-coil domain-containing protein 1 - Mus musculus (Mouse)                                                                                                             | 21389  | 19 | 0  | 2  | 0  |
| Q8CBW7 | Cysteine-rich hydrophobic domain 1 protein (Brain X-linked protein) - Mus musculus (Mouse)                                                                                                   | 26345  | 19 | 0  | 5  | 0  |
| Q9WTP7 | GTP:AMP phosphotransferase mitochondrial (EC 2.7.4.10) (Adenylate kinase 3) (AK3) (Adenylate kinase 3 alpha-like 1) - Mus musculus (Mouse)                                                   | 25467  | 19 | 0  | 15 | 0  |
| Q60722 | Transcription factor 4 (Immunoglobulin transcription factor 2) (ITF-2) (MITF-2) (SL3-3 enhancer factor 2) (SEF-2) (Class A helix-loop-helix transcription factor ME2) - Mus musculus (Mouse) | 71808  | 19 | 19 | 18 | 22 |
| P58802 | TBC1 domain family member 10A (EBP50-PDX interactor of 64 kDa) (EPI64 protein) - Mus musculus (Mouse)                                                                                        | 56737  | 19 | 16 | 7  | 5  |
| P05201 | Aspartate aminotransferase, cytoplasmic (EC 2.6.1.1) (Transaminase A) (Glutamate oxaloacetate transaminase 1) - Mus musculus (Mouse)                                                         | 46488  | 19 | 0  | 4  | 0  |
| O35085 | Homeobox protein ARX (Aristaless-related homeobox) - Mus musculus (Mouse)                                                                                                                    | 58854  | 19 | 19 | 4  | 10 |
| Q62066 | Paired mesoderm homeobox protein 2A (Paired-like homeobox 2A) (PHOX2A homeodomain protein) (Aristaless homeobox protein homolog) - Mus musculus (Mouse)                                      | 29741  | 19 | 0  | 1  | 0  |
| O55103 | Periaxin - Mus musculus (Mouse)                                                                                                                                                              | 147823 | 19 | 30 | 28 | 23 |

|        |                                                                                                                                                                                                                                                           |        |    |    |    |    |
|--------|-----------------------------------------------------------------------------------------------------------------------------------------------------------------------------------------------------------------------------------------------------------|--------|----|----|----|----|
| Q61191 | Host cell factor (HCF) (HCF-1) (C1 factor) [Contains: HCF N-terminal chain 1; HCF N-terminal chain 2; HCF N-terminal chain 3; HCF N-terminal chain 4; HCF N-terminal chain 5; HCF N-terminal chain 6; HCF C-terminal chain 1; HCF C-terminal chain 2; HCF | 212231 | 19 | 0  | 11 | 0  |
| Q61602 | Zinc finger protein GLI3 - Mus musculus (Mouse)                                                                                                                                                                                                           | 174944 | 19 | 0  | 32 | 0  |
| Q9D0R2 | Threonyl-tRNA synthetase, cytoplasmic (EC 6.1.1.3) (Threonine--tRNA ligase) (ThrRS) - Mus musculus (Mouse)                                                                                                                                                | 84215  | 19 | 51 | 7  | 16 |
| Q8C1F4 | Chondroitin beta-1,4-N-acetylgalactosaminyltransferase 2 (EC 2.4.1.174) (GalNAcT-2) (beta4GalNAcT-2) - Mus musculus (Mouse)                                                                                                                               | 62889  | 19 | 0  | 3  | 0  |
| Q921Q3 | Chitobiosyldiphosphodolichol beta-mannosyltransferase (EC 2.4.1.142) (GDP-mannose-dolichol diphosphochitobiose mannosyltransferase) (GDP-Man:GlcNAc2-PP-dolichol mannosyltransferase) (Beta-1,4-mannosyltransferase) - Mus musculus (Mouse)               | 50464  | 19 | 0  | 13 | 0  |
| Q6P5F9 | Exportin-1 (Exp1) (Chromosome region maintenance 1 protein homolog) - Mus musculus (Mouse)                                                                                                                                                                | 124153 | 19 | 43 | 9  | 9  |
| Q8VD65 | Phosphoinositide 3-kinase regulatory subunit 4 (EC 2.7.11.1) (PI3-kinase regulatory subunit 4) - Mus musculus (Mouse)                                                                                                                                     | 153814 | 19 | 18 | 16 | 13 |
| Q5S006 | Leucine-rich repeat serine/threonine-protein kinase 2 (EC 2.7.11.1) - Mus musculus (Mouse)                                                                                                                                                                | 288544 | 19 | 15 | 25 | 16 |
| Q8CCN1 | NACHT, LRR and PYD-containing protein 10 - Mus musculus (Mouse)                                                                                                                                                                                           | 77288  | 19 | 0  | 12 | 0  |

|        |                                                                                                                                                                                                                                                                            |        |    |    |    |   |
|--------|----------------------------------------------------------------------------------------------------------------------------------------------------------------------------------------------------------------------------------------------------------------------------|--------|----|----|----|---|
| P97402 | N-acetyllactosaminide beta-1,6-N-acetylglucosaminyltransferase (EC 2.4.1.150) (N-acetylglucosaminyltransferase) (I-branching enzyme) (IGNT) (Large I antigen-forming beta-1,6-N-acetylglucosaminyltransferase) - Mus musculus (Mouse)                                      | 46048  | 19 | 0  | 4  | 0 |
| O88621 | Forkhead box protein H1 (Forkhead activin signal transducer 1) (Fast-1) (Forkhead activin signal transducer 2) (Fast-2) - Mus musculus (Mouse)                                                                                                                             | 44372  | 19 | 15 | 11 | 5 |
| P34884 | Macrophage migration inhibitory factor (MIF) (Phenylpyruvate tautomerase) (EC 5.3.2.1) (Glycosylation-inhibiting factor) (GIF) (Delayed early response protein 6) (DER6) - Mus musculus (Mouse)                                                                            | 12667  | 19 | 17 | 5  | 4 |
| Q9R0X4 | Acyl-coenzyme A thioesterase 9, mitochondrial precursor (EC 3.1.2.-) (Acyl-CoA thioesterase 9) (Acyl-CoA thioester hydrolase 9) (Acyl coenzyme A thioester hydrolase 2) (48 kDa acyl-CoA thioester hydrolase) (p48) (Mt-ACT48) (Protein U8) (MTE-2) - Mus musculus (Mouse) | 50813  | 19 | 0  | 2  | 0 |
| Q9WVP1 | AP-1 complex subunit mu-2 (Adaptor-related protein complex 1 mu-2 subunit) (Mu-adaptin 2) (Adaptor protein complex AP-1 mu-2 subunit) (Golgi adaptor HA1/AP1 adaptin mu-2 subunit) (Clathrin assembly protein assembly protein complex 1 medium chain 2)                   | 48220  | 19 | 0  | 14 | 0 |
| Q99PP2 | Zinc finger protein 318 (Testicular zinc finger protein) - Mus musculus (Mouse)                                                                                                                                                                                            | 224986 | 19 | 0  | 24 | 0 |
| P48318 | Glutamate decarboxylase 1 (EC 4.1.1.15) (Glutamate decarboxylase 67 kDa isoform) (GAD-67) (67 kDa glutamic acid decarboxylase) - Mus musculus (Mouse)                                                                                                                      | 67347  | 19 | 0  | 7  | 0 |

|        |                                                                                                                                                                                                                                            |        |    |    |    |    |
|--------|--------------------------------------------------------------------------------------------------------------------------------------------------------------------------------------------------------------------------------------------|--------|----|----|----|----|
| P10749 | Interleukin-1 beta precursor (IL-1 beta) - Mus musculus (Mouse)                                                                                                                                                                            | 31253  | 19 | 0  | 2  | 0  |
| Q9QZL9 | Dickkopf-like protein 1 precursor (Soggy-1 protein) (SGY-1) - Mus musculus (Mouse)                                                                                                                                                         | 26680  | 19 | 17 | 6  | 15 |
| P60330 | Separin (EC 3.4.22.49) (Separase) (Caspase-like protein ESPL1) (Extra spindle poles-like 1 protein) - Mus musculus (Mouse)                                                                                                                 | 236765 | 19 | 18 | 10 | 17 |
| P25318 | Collagen alpha-2(VIII) chain precursor (Endothelial collagen) - Mus musculus (Mouse)                                                                                                                                                       | 67072  | 19 | 0  | 9  | 0  |
| O08785 | Circadian locomotor output cycles protein kaput (mCLOCK) - Mus musculus (Mouse)                                                                                                                                                            | 96846  | 19 | 18 | 10 | 12 |
| Q9CU62 | Structural maintenance of chromosomes protein 1A (SMC1alpha protein) (Chromosome segregation protein SmcB) (Sb1.8) - Mus musculus (Mouse)                                                                                                  | 143754 | 19 | 0  | 36 | 0  |
| P52430 | Serum paraoxonase/arylesterase 1 (EC 3.1.1.2) (EC 3.1.8.1) (PON 1) (Serum aryldialkylphosphatase 1) (A-esterase 1) (Aromatic esterase 1) - Mus musculus (Mouse)                                                                            | 39711  | 19 | 21 | 25 | 15 |
| Q8BY79 | Transmembrane protein 20 - Mus musculus (Mouse)                                                                                                                                                                                            | 40703  | 19 | 15 | 4  | 4  |
| O08908 | Phosphatidylinositol 3-kinase regulatory subunit beta (PI3-kinase p85-subunit beta) (PtdIns-3-kinase p85-beta) - Mus musculus (Mouse)                                                                                                      | 81601  | 19 | 25 | 20 | 24 |
| Q9JKF1 | Ras GTPase-activating-like protein IQGAP1 - Mus musculus (Mouse)                                                                                                                                                                           | 189437 | 19 | 81 | 21 | 25 |
| O89093 | Small inducible cytokine A20 precursor (CCL20) (Macrophage inflammatory protein 3 alpha) (MIP-3-alpha) (Liver and activation-regulated chemokine) (CC chemokine LARC) (Beta chemokine exodus-1) (CC chemokine ST38) - Mus musculus (Mouse) | 11161  | 19 | 0  | 2  | 0  |
| O35621 | Phosphomannomutase 1 (EC 5.4.2.8) (PMM 1) - Mus musculus (Mouse)                                                                                                                                                                           | 30041  | 19 | 0  | 4  | 0  |

|        |                                                                                                                                                                                                       |        |    |    |    |    |
|--------|-------------------------------------------------------------------------------------------------------------------------------------------------------------------------------------------------------|--------|----|----|----|----|
| Q3TY60 | Uncharacterized protein KIAA0773 homolog - Mus musculus (Mouse)                                                                                                                                       | 36107  | 19 | 0  | 3  | 0  |
| Q9QZ05 | Eukaryotic translation initiation factor 2-alpha kinase 4 (EC 2.7.11.1) (GCN2-like protein) (mGCN2) - Mus musculus (Mouse)                                                                            | 187967 | 19 | 19 | 28 | 15 |
| Q6ZQ88 | Lysine-specific histone demethylase 1 (EC 1.-.-.-) (Flavin-containing amine oxidase domain-containing protein 2) (BRAAF35-HDAC complex protein BHC110) - Mus musculus (Mouse)                         | 93306  | 19 | 0  | 8  | 0  |
| P58281 | Dynamin-like 120 kDa protein, mitochondrial precursor (Optic atrophy protein 1 homolog) (Large GTP-binding protein) (LargeG) [Contains: Dynamin-like 120 kDa protein, form S1] - Mus musculus (Mouse) | 111783 | 19 | 0  | 17 | 0  |
| Q8CBY1 | Sterile alpha motif domain-containing protein 4A - Mus musculus (Mouse)                                                                                                                               | 69681  | 19 | 0  | 15 | 0  |
| P62257 | Ubiquitin-conjugating enzyme E2 H (EC 6.3.2.19) (Ubiquitin-protein ligase H) (Ubiquitin carrier protein H) (UBCH2) (E2-20K) - Mus musculus (Mouse)                                                    | 20699  | 19 | 0  | 4  | 0  |
| P23188 | Furin precursor (EC 3.4.21.75) (Paired basic amino acid residue cleaving enzyme) (PACE) (Dibasic-processing enzyme) (Prohormone convertase 3) - Mus musculus (Mouse)                                  | 88061  | 19 | 19 | 19 | 12 |
| Q8VDI7 | Ubiquitin-associated domain-containing protein 1 (E3 ubiquitin-protein ligase subunit KPC2) (Kip1 ubiquitination-promoting complex protein 2) - Mus musculus (Mouse)                                  | 45730  | 19 | 24 | 7  | 16 |
| Q3UHX2 | 28 kDa heat- and acid-stable phosphoprotein (PDGF-associated protein) (PAP) (PDGFA-associated protein 1) (PAP1) - Mus musculus (Mouse)                                                                | 20593  | 19 | 0  | 5  | 0  |

|        |                                                                                                                                                                                                                             |        |    |    |    |    |
|--------|-----------------------------------------------------------------------------------------------------------------------------------------------------------------------------------------------------------------------------|--------|----|----|----|----|
| Q7TNM2 | Tripartite motif-containing protein 46 (Tripartite, fibronectin type-III and C-terminal SPRY motif protein) - Mus musculus (Mouse)                                                                                          | 85203  | 19 | 0  | 6  | 0  |
| P28652 | Calcium/calmodulin-dependent protein kinase type II beta chain (EC 2.7.11.17) (CaM-kinase II beta chain) (CaM kinase II subunit beta) (CaMK-II subunit beta) - Mus musculus (Mouse)                                         | 61164  | 19 | 0  | 7  | 0  |
| Q80X60 | EF-hand calcium-binding domain-containing protein 3 - Mus musculus (Mouse)                                                                                                                                                  | 50021  | 19 | 0  | 8  | 0  |
| P41233 | ATP-binding cassette sub-family A member 1 (ATP-binding cassette transporter 1) (ATP-binding cassette 1) (ABC-1) - Mus musculus (Mouse)                                                                                     | 256092 | 19 | 22 | 23 | 17 |
| Q9R1X5 | Multidrug resistance-associated protein 5 (ATP-binding cassette sub-family C member 5) (ABC transporter MOAT-C) (SMRP) - Mus musculus (Mouse)                                                                               | 162111 | 19 | 20 | 32 | 18 |
| Q71LX4 | Talin-2 - Mus musculus (Mouse)                                                                                                                                                                                              | 255679 | 19 | 0  | 19 | 0  |
| Q8R1Q0 | Syntaxin-19 - Mus musculus (Mouse)                                                                                                                                                                                          | 34302  | 19 | 22 | 7  | 2  |
| Q80XC6 | Uncharacterized protein C14orf102 homolog - Mus musculus (Mouse)                                                                                                                                                            | 134595 | 19 | 0  | 18 | 0  |
| Q8C0V0 | Serine/threonine-protein kinase tousled-like 1 (EC 2.7.11.1) (Tousled-like kinase 1) - Mus musculus (Mouse)                                                                                                                 | 87140  | 19 | 0  | 12 | 0  |
| Q91ZA3 | Propionyl-CoA carboxylase alpha chain, mitochondrial precursor (EC 6.4.1.3) (PCCase subunit alpha) (Propanoyl-CoA:carbon dioxide ligase subunit alpha) - Mus musculus (Mouse)                                               | 80498  | 19 | 0  | 13 | 0  |
| P27046 | Alpha-mannosidase 2 (EC 3.2.1.114) (Alpha-mannosidase II) (Mannosyl-oligosaccharide 1,3-1,6-alpha-mannosidase) (MAN II) (Golgi alpha-mannosidase II) (Mannosidase alpha class 2A member 1) (AMAN II) - Mus musculus (Mouse) | 132247 | 19 | 0  | 19 | 0  |

|        |                                                                                                                                                                                                                                                       |        |    |   |    |   |
|--------|-------------------------------------------------------------------------------------------------------------------------------------------------------------------------------------------------------------------------------------------------------|--------|----|---|----|---|
| P16330 | 2~,3~-cyclic-nucleotide 3~-phosphodiesterase (EC 3.1.4.37) (CNP) (CNPase) - Mus musculus (Mouse)                                                                                                                                                      | 47493  | 19 | 0 | 11 | 0 |
| P51432 | 1-phosphatidylinositol-4,5-bisphosphate phosphodiesterase beta 3 (EC 3.1.4.11) (Phosphoinositide phospholipase C) (Phospholipase C-beta-3) (PLC-beta-3) - Mus musculus (Mouse)                                                                        | 140260 | 19 | 0 | 8  | 0 |
| Q6S5J6 | Krev interaction trapped protein 1 (Krev interaction trapped 1) (Cerebral cavernous malformations 1 protein homolog) - Mus musculus (Mouse)                                                                                                           | 84670  | 19 | 0 | 9  | 0 |
| Q9D2D7 | Zinc finger protein 687 - Mus musculus (Mouse)                                                                                                                                                                                                        | 132891 | 19 | 0 | 5  | 0 |
| Q9Z2A0 | 3-phosphoinositide-dependent protein kinase 1 (EC 2.7.11.1) (mPDK1) - Mus musculus (Mouse)                                                                                                                                                            | 64175  | 19 | 0 | 4  | 0 |
| P09470 | Angiotensin-converting enzyme, somatic isoform precursor (EC 3.4.15.1) (Dipeptidyl carboxypeptidase I) (Kininase II) [Contains: Angiotensin-converting enzyme, somatic isoform, soluble form] - Mus musculus (Mouse)                                  | 151678 | 19 | 0 | 6  | 0 |
| P61290 | Proteasome activator complex subunit 3 (Proteasome activator 28-gamma subunit) (PA28gamma) (PA28g) (Activator of multicatalytic protease subunit 3) (11S regulator complex subunit gamma) (REG-gamma) (Ki nuclear autoantigen) - Mus musculus (Mouse) | 29602  | 19 | 0 | 5  | 0 |
| Q9JIH2 | Nucleoporin 50 kDa (Nuclear pore-associated protein 60 kDa-like) - Mus musculus (Mouse)                                                                                                                                                               | 49921  | 19 | 0 | 2  | 0 |
| Q80X53 | Coiled-coil domain-containing protein 116 - Mus musculus (Mouse)                                                                                                                                                                                      | 60583  | 19 | 0 | 3  | 0 |

|        |                                                                                                                                                                                                                    |        |    |    |    |    |
|--------|--------------------------------------------------------------------------------------------------------------------------------------------------------------------------------------------------------------------|--------|----|----|----|----|
| P28649 | Cytochrome P450 19A1 (EC 1.14.14.1) (Aromatase) (CYPXIX) (Estrogen synthetase) (P-450AROM) - Mus musculus (Mouse)                                                                                                  | 58490  | 19 | 0  | 8  | 0  |
| P32299 | B2 bradykinin receptor (BK-2 receptor) (B2R) - Mus musculus (Mouse)                                                                                                                                                | 45101  | 19 | 0  | 1  | 0  |
| Q3UHC2 | Leucine-rich repeat serine/threonine-protein kinase 1 (EC 2.7.11.1) - Mus musculus (Mouse)                                                                                                                         | 228405 | 19 | 20 | 37 | 23 |
| Q8R059 | UDP-glucose 4-epimerase (EC 5.1.3.2) (Galactowaldenase) (UDP-galactose 4-epimerase) - Mus musculus (Mouse)                                                                                                         | 38542  | 19 | 15 | 20 | 16 |
| Q9D952 | Envoplakin (p210) (210 kDa cornified envelope precursor protein) - Mus musculus (Mouse)                                                                                                                            | 233659 | 19 | 20 | 42 | 28 |
| Q3UVR3 | Tau-tubulin kinase 2 - Mus musculus (Mouse)                                                                                                                                                                        | 137598 | 19 | 19 | 49 | 60 |
| Q99JP0 | Mitogen-activated protein kinase kinase kinase 3 (EC 2.7.11.1) (MAPK/ERK kinase kinase 3) (MEK kinase kinase 3) (MEKKK 3) (Germinal center kinase-related protein kinase) (GLK) (Fragments) - Mus musculus (Mouse) | 78194  | 19 | 0  | 8  | 0  |
| Q9JJC8 | Non-imprinted in Prader-Willi/Angelman syndrome region protein 2 homolog - Mus musculus (Mouse)                                                                                                                    | 39408  | 19 | 0  | 9  | 0  |
| Q9D0U9 | Protein ARV1 - Mus musculus (Mouse)                                                                                                                                                                                | 31142  | 19 | 0  | 9  | 0  |
| Q80ZF8 | Brain-specific angiogenesis inhibitor 3 precursor - Mus musculus (Mouse)                                                                                                                                           | 174707 | 19 | 0  | 14 | 0  |
| Q8CIG3 | Flavin-containing amine oxidase domain-containing protein 1 (EC 1.-.-) - Mus musculus (Mouse)                                                                                                                      | 93885  | 19 | 0  | 14 | 0  |
| Q60739 | BAG family molecular chaperone regulator 1 (BCL-2-binding athanogene-1) (BAG-1) - Mus musculus (Mouse)                                                                                                             | 40001  | 18 | 0  | 5  | 0  |
| Q35691 | Pinin - Mus musculus (Mouse)                                                                                                                                                                                       | 82557  | 18 | 0  | 12 | 0  |
| Q62443 | Neuronal pentraxin-1 precursor (NP1) (Neuronal pentraxin I) (NP I) - Mus musculus (Mouse)                                                                                                                          | 47601  | 18 | 0  | 6  | 0  |



|        |                                                                                                                                                                         |        |    |    |    |    |
|--------|-------------------------------------------------------------------------------------------------------------------------------------------------------------------------|--------|----|----|----|----|
| P57748 | Matrix metalloproteinase-20 precursor (EC 3.4.24.-) (MMP-20) (Enamel metalloproteinase) (Enamelysin) - Mus musculus (Mouse)                                             | 54510  | 18 | 0  | 5  | 0  |
| Q8C525 | Uncharacterized protein C3orf59 homolog - Mus musculus (Mouse)                                                                                                          | 49016  | 18 | 0  | 18 | 0  |
| P43267 | SOX-15 protein - Mus musculus (Mouse)                                                                                                                                   | 25466  | 18 | 0  | 16 | 0  |
| Q9JMH6 | Thioredoxin reductase 1, cytoplasmic (EC 1.8.1.9) (TR) (TR1) - Mus musculus (Mouse)                                                                                     | 55318  | 18 | 0  | 10 | 0  |
| Q5SZA1 | Sodium-dependent phosphate transport protein 3 (Sodium/phosphate cotransporter 3) (Na(+)/Pi cotransporter 3) (Solute carrier family 17 member 2) - Mus musculus (Mouse) | 52558  | 18 | 0  | 3  | 0  |
| P56479 | Galanin receptor type 1 (GAL1-R) (GALR1) - Mus musculus (Mouse)                                                                                                         | 39659  | 18 | 0  | 4  | 0  |
| Q9Z273 | Tubby-related protein 1 (Tubby-like protein 1) - Mus musculus (Mouse)                                                                                                   | 60527  | 18 | 20 | 12 | 7  |
| Q91VS8 | FERM, RhoGEF and pleckstrin domain-containing protein 2 (FERM domain including RhoGEF) (FIR) - Mus musculus (Mouse)                                                     | 122189 | 18 | 0  | 9  | 0  |
| Q62059 | Versican core protein precursor (Large fibroblast proteoglycan) (Chondroitin sulfate proteoglycan core protein 2) (PG-M) - Mus musculus (Mouse)                         | 368613 | 18 | 16 | 27 | 14 |
| P48614 | Protein Wnt-10b precursor (Wnt-12) - Mus musculus (Mouse)                                                                                                               | 44459  | 18 | 0  | 4  | 0  |
| P22361 | Hepatocyte nuclear factor 1-alpha (HNF-1A) (Liver-specific transcription factor LF-B1) (LFB1) - Mus musculus (Mouse)                                                    | 67367  | 18 | 0  | 2  | 0  |
| Q62417 | Sorbin and SH3 domain-containing protein 1 (Ponsin) (c-Cbl-associated protein) (CAP) (SH3 domain protein 5) (SH3P12) - Mus musculus (Mouse)                             | 143952 | 18 | 0  | 14 | 0  |

|        |                                                                                                                                                                                                                      |        |    |    |    |    |
|--------|----------------------------------------------------------------------------------------------------------------------------------------------------------------------------------------------------------------------|--------|----|----|----|----|
| Q5NCE8 | Magnesium transporter MRS2L, mitochondrial precursor (MRS2-like protein) - Mus musculus (Mouse)                                                                                                                      | 49553  | 18 | 0  | 5  | 0  |
| Q61001 | Laminin subunit alpha-5 precursor - Mus musculus (Mouse)                                                                                                                                                             | 416122 | 18 | 17 | 43 | 32 |
| P61759 | Prefoldin subunit 3 (Von Hippel-Lindau-binding protein 1) (VHL-binding protein 1) (VBP-1) - Mus musculus (Mouse)                                                                                                     | 22592  | 18 | 0  | 8  | 0  |
| Q7TT36 | Probable G-protein coupled receptor 125 precursor - Mus musculus (Mouse)                                                                                                                                             | 146741 | 18 | 0  | 26 | 0  |
| Q8VDS7 | Uncharacterized protein C6orf182 homolog - Mus musculus (Mouse)                                                                                                                                                      | 47217  | 18 | 0  | 11 | 0  |
| Q99KN9 | Clathrin interactor 1 (Epsin-4) (Epsin-related protein) (EpsinR) (Enthoprotin) - Mus musculus (Mouse)                                                                                                                | 68811  | 18 | 0  | 6  | 0  |
| Q6ZQ73 | Cullin-associated NEDD8-dissociated protein 2 (Cullin-associated and neddylation-dissociated protein 2) (p120 CAND2) (TBP-interacting protein TIP120B) (TBP-interacting protein of 120 kDa B) - Mus musculus (Mouse) | 137086 | 18 | 20 | 17 | 13 |
| Q01098 | Glutamate [NMDA] receptor subunit epsilon 3 precursor (N-methyl D-aspartate receptor subtype 2C) (NR2C) (NMDAR2C) - Mus musculus (Mouse)                                                                             | 136931 | 18 | 33 | 15 | 15 |
| Q91ZJ0 | Crossover junction endonuclease MUS81 (EC 3.1.22.-) - Mus musculus (Mouse)                                                                                                                                           | 62107  | 18 | 0  | 13 | 0  |
| Q9JLM9 | Growth factor receptor-bound protein 14 (GRB14 adapter protein) - Mus musculus (Mouse)                                                                                                                               | 61162  | 18 | 0  | 6  | 0  |
| Q8BMD2 | Zinc finger protein DZIP1 (DAZ-interacting protein 1 homolog) - Mus musculus (Mouse)                                                                                                                                 | 97855  | 18 | 0  | 10 | 0  |
| Q8CBE3 | WD repeat protein 37 - Mus musculus (Mouse)                                                                                                                                                                          | 55696  | 18 | 0  | 13 | 0  |

|        |                                                                                                                                                                                                                                                          |        |    |    |    |    |
|--------|----------------------------------------------------------------------------------------------------------------------------------------------------------------------------------------------------------------------------------------------------------|--------|----|----|----|----|
| P35585 | AP-1 complex subunit mu-1 (Adaptor-related protein complex 1 mu-1 subunit) (Mu-adaptin 1) (Adaptor protein complex AP-1 mu-1 subunit) (Golgi adaptor HA1/AP1 adaptin mu-1 subunit) (Clathrin assembly protein assembly protein complex 1 medium chain 1) | 48683  | 18 | 0  | 6  | 0  |
| Q6P1E8 | DJ-1-binding protein - Mus musculus (Mouse)                                                                                                                                                                                                              | 174223 | 18 | 16 | 14 | 16 |
| Q5DTH5 | Teashirt homolog 1 (Serologically defined colon cancer antigen 3 homolog) - Mus musculus (Mouse)                                                                                                                                                         | 119463 | 18 | 0  | 14 | 0  |
| Q3V096 | Ankyrin repeat domain-containing protein 42 - Mus musculus (Mouse)                                                                                                                                                                                       | 59067  | 18 | 20 | 8  | 5  |
| Q5SXA9 | WW domain-containing protein 1 (Kidney and brain protein) (KIBRA) - Mus musculus (Mouse)                                                                                                                                                                 | 124946 | 18 | 0  | 15 | 0  |
| O35601 | FYN-binding protein (FYN-T-binding protein) (FYB-120/130) (p120/p130) (SLP-76-associated phosphoprotein) (SLAP-130) (Adhesion and degranulation promoting adaptor protein) (ADAP) - Mus musculus (Mouse)                                                 | 90229  | 18 | 0  | 7  | 0  |
| Q9D0I9 | Arginyl-tRNA synthetase, cytoplasmic (EC 6.1.1.19) (Arginine--tRNA ligase) (ArgRS) - Mus musculus (Mouse)                                                                                                                                                | 76423  | 18 | 0  | 20 | 0  |
| P15539 | Cytochrome P450 11B2, mitochondrial precursor (EC 1.14.15.4) (EC 1.14.15.5) (CYPXIB2) (P450C11) (Steroid 11-beta-hydroxylase) (Aldosterone synthase) - Mus musculus (Mouse)                                                                              | 57449  | 18 | 0  | 32 | 0  |
| P17125 | Transforming growth factor beta-3 precursor (TGF-beta-3) - Mus musculus (Mouse)                                                                                                                                                                          | 47653  | 18 | 0  | 6  | 0  |
| Q80X44 | Zinc finger and BTB domain-containing protein 24 (Zinc finger protein 450) (Bone morphogenetic protein-induced factor 1) (Brain-specific protein 1) - Mus musculus (Mouse)                                                                               | 80013  | 18 | 0  | 5  | 0  |

|        |                                                                                                                                                                                                                               |        |    |    |    |    |
|--------|-------------------------------------------------------------------------------------------------------------------------------------------------------------------------------------------------------------------------------|--------|----|----|----|----|
| P59900 | EMILIN-3 precursor (EMILIN-5) (Elastin microfibril interface located protein 5) (Elastin microfibril interfacier 5) - Mus musculus (Mouse)                                                                                    | 83372  | 18 | 19 | 12 | 6  |
| Q6P1Z5 | Protein FAM113A - Mus musculus (Mouse)                                                                                                                                                                                        | 51771  | 18 | 0  | 12 | 0  |
| P26928 | Hepatocyte growth factor-like protein precursor (Macrophage stimulatory protein) (MSP) [Contains: Hepatocyte growth factor-like protein alpha chain; Hepatocyte growth factor-like protein beta chain] - Mus musculus (Mouse) | 83102  | 18 | 0  | 3  | 0  |
| Q61035 | Histidyl-tRNA synthetase, cytoplasmic (EC 6.1.1.21) (Histidine--tRNA ligase) (HisRS) - Mus musculus (Mouse)                                                                                                                   | 57893  | 18 | 17 | 9  | 13 |
| Q8BH55 | Threonine synthase-like 1 - Mus musculus (Mouse)                                                                                                                                                                              | 84017  | 18 | 0  | 6  | 0  |
| Q8JZV4 | RNA-binding protein 41 (RNA-binding motif protein 41) - Mus musculus (Mouse)                                                                                                                                                  | 47714  | 18 | 0  | 4  | 0  |
| Q63ZW7 | InaD-like protein (Inadl protein) (Pals1-associated tight junction protein) (Protein associated to tight junctions) (Channel-interacting PDZ domain-containing protein) - Mus musculus (Mouse)                                | 199364 | 18 | 30 | 12 | 15 |
| Q7TSC1 | Large proline-rich protein BAT2 (HLA-B-associated transcript 2) - Mus musculus (Mouse)                                                                                                                                        | 229633 | 18 | 0  | 20 | 0  |
| P70266 | 6-phosphofructo-2-kinase/fructose-2,6-biphosphatase 1 (6PF-2-K/Fru-2,6-P2ASE liver isozyme) [Includes: 6-phosphofructo-2-kinase (EC 2.7.1.105); Fructose-2,6-bisphosphatase (EC 3.1.3.46)] - Mus musculus (Mouse)             | 55385  | 18 | 17 | 16 | 23 |
| P97313 | DNA-dependent protein kinase catalytic subunit (EC 2.7.11.1) (DNA-PK catalytic subunit) (DNA-PKcs) (P460) - Mus musculus (Mouse)                                                                                              | 476445 | 18 | 23 | 46 | 42 |
| P70248 | Myosin-Ii - Mus musculus (Mouse)                                                                                                                                                                                              | 126610 | 18 | 0  | 13 | 0  |

|        |                                                                                                                                                           |        |    |    |    |    |
|--------|-----------------------------------------------------------------------------------------------------------------------------------------------------------|--------|----|----|----|----|
| O70458 | Oncostatin-M specific receptor subunit beta precursor - Mus musculus (Mouse)                                                                              | 111414 | 18 | 0  | 5  | 0  |
| Q61599 | Rho GDP-dissociation inhibitor 2 (Rho GDI 2) (Rho-GDI beta) (D4) - Mus musculus (Mouse)                                                                   | 22894  | 18 | 25 | 9  | 10 |
| Q99P47 | Contactin-associated protein-like 4 precursor (Cell recognition molecule Caspr4) - Mus musculus (Mouse)                                                   | 146618 | 18 | 16 | 21 | 10 |
| Q62181 | Semaphorin-3C precursor (Semaphorin E) (Sema E) - Mus musculus (Mouse)                                                                                    | 86517  | 18 | 0  | 9  | 0  |
| P38060 | Hydroxymethylglutaryl-CoA lyase, mitochondrial precursor (EC 4.1.3.4) (HMG-CoA lyase) (HL) (3-hydroxy-3-methylglutarate-CoA lyase) - Mus musculus (Mouse) | 34595  | 18 | 0  | 5  | 0  |
| O88978 | Leucine-rich repeat-containing protein 6 (Leucine-rich testis-specific protein) (Testis-specific leucine-rich repeat protein) - Mus musculus (Mouse)      | 55471  | 18 | 0  | 24 | 0  |
| Q5H8C4 | Vacuolar protein sorting-associated protein 13A (Chorein) (Chorea-acanthocytosis protein homolog) - Mus musculus (Mouse)                                  | 360940 | 18 | 0  | 29 | 0  |
| Q921E2 | Ras-related protein Rab-31 - Mus musculus (Mouse)                                                                                                         | 21660  | 18 | 29 | 7  | 6  |
| Q01405 | Protein transport protein Sec23A (SEC23-related protein A) - Mus musculus (Mouse)                                                                         | 87019  | 18 | 0  | 5  | 0  |
| Q91ZN5 | Adenosine 3~-phospho 5~-phosphosulfate transporter 1 (PAPS transporter 1) (Solute carrier family 35 member B2) - Mus musculus (Mouse)                     | 47795  | 18 | 0  | 7  | 0  |
| Q9JKT3 | Taste receptor type 2 member 4 (T2R4) (Taste receptor type 2 member 8) (T2R8) - Mus musculus (Mouse)                                                      | 34522  | 18 | 0  | 1  | 0  |
| Q62234 | Myomesin-1 (Skelemin) - Mus musculus (Mouse)                                                                                                              | 186470 | 18 | 0  | 27 | 0  |

|        |                                                                                                                                                                                                                                                           |        |    |    |    |    |
|--------|-----------------------------------------------------------------------------------------------------------------------------------------------------------------------------------------------------------------------------------------------------------|--------|----|----|----|----|
| P18155 | Bifunctional methylenetetrahydrofolate dehydrogenase/cyclohydrolase, mitochondrial precursor [Includes: NAD-dependent methylenetetrahydrofolate dehydrogenase (EC 1.5.1.15); Methenyltetrahydrofolate cyclohydrolase (EC 3.5.4.9)] - Mus musculus (Mouse) | 38010  | 18 | 21 | 7  | 10 |
| O70468 | Myosin-binding protein C, cardiac-type (Cardiac MyBP-C) (C-protein, cardiac muscle isoform) - Mus musculus (Mouse)                                                                                                                                        | 141799 | 18 | 17 | 21 | 26 |
| Q8C0D4 | Rho GTPase-activating protein 12 - Mus musculus (Mouse)                                                                                                                                                                                                   | 95693  | 18 | 18 | 34 | 49 |
| Q5XKE0 | Myosin-binding protein C, fast-type (Fast MyBP-C) (C-protein, skeletal muscle fast isoform) - Mus musculus (Mouse)                                                                                                                                        | 128128 | 18 | 17 | 27 | 19 |
| Q60611 | DNA-binding protein SATB1 (Special AT-rich sequence-binding protein 1) - Mus musculus (Mouse)                                                                                                                                                             | 86152  | 18 | 0  | 7  | 0  |
| P10300 | T-cell surface glycoprotein CD8 beta chain precursor (T-cell surface glycoprotein Lyt-3) (T-cell membrane glycoprotein Ly-3) (Lymphocyte antigen 3) (CD8b antigen) - Mus musculus (Mouse)                                                                 | 24614  | 18 | 0  | 2  | 0  |
| Q9CXP4 | Rho GTPase-activating protein 8 - Mus musculus (Mouse)                                                                                                                                                                                                    | 49341  | 18 | 0  | 9  | 0  |
| Q9JIA1 | Leucine-rich glioma-inactivated protein 1 precursor - Mus musculus (Mouse)                                                                                                                                                                                | 64345  | 18 | 0  | 13 | 0  |
| Q9JM52 | Misshapen-like kinase 1 (EC 2.7.11.1) (Mitogen-activated protein kinase kinase kinase 6) (MAPK/ERK kinase kinase 6) (MEK kinase kinase 6) (MEKKK 6) (Misshapen/NIK-related kinase) (GCK family kinase MiNK) - Mus musculus (Mouse)                        | 147917 | 18 | 54 | 13 | 11 |

|        |                                                                                                                                                                                                                                 |        |    |    |    |    |
|--------|---------------------------------------------------------------------------------------------------------------------------------------------------------------------------------------------------------------------------------|--------|----|----|----|----|
| P97445 | Voltage-dependent P/Q-type calcium channel subunit alpha-1A (Voltage-gated calcium channel subunit alpha Cav2.1) (Calcium channel, L type, alpha-1 polypeptide isoform 4) (Brain calcium channel I) (BI) - Mus musculus (Mouse) | 269244 | 18 | 16 | 19 | 13 |
| Q8CAA7 | Phosphoglucosyltransferase-2-like 1 (EC 5.4.2.2) - Mus musculus (Mouse)                                                                                                                                                         | 71147  | 18 | 0  | 12 | 0  |
| Q6ZPR4 | Potassium channel subfamily T member 1 - Mus musculus (Mouse)                                                                                                                                                                   | 140013 | 18 | 0  | 13 | 0  |
| Q62172 | RalA-binding protein 1 (RalBP1) (Ral-interacting protein 1) (Dinitrophenyl S-glutathione ATPase) (DNP-SG ATPase) - Mus musculus (Mouse)                                                                                         | 75441  | 18 | 16 | 8  | 6  |
| Q64441 | Cytochrome P450 24A1, mitochondrial precursor (EC 1.14.-.-) (P450-CC24) (Vitamin D(3) 24-hydroxylase) (1,25-dihydroxyvitamin D(3) 24-hydroxylase) (24-OHase) - Mus musculus (Mouse)                                             | 59928  | 18 | 0  | 8  | 0  |
| Q8CIN4 | Serine/threonine-protein kinase PAK 2 (EC 2.7.11.1) (p21-activated kinase 2) (PAK-2) - Mus musculus (Mouse)                                                                                                                     | 58179  | 18 | 0  | 6  | 0  |
| Q99LI8 | Hepatocyte growth factor-regulated tyrosine kinase substrate - Mus musculus (Mouse)                                                                                                                                             | 86588  | 18 | 0  | 10 | 0  |
| Q99J95 | Cell division protein kinase 9 (EC 2.7.11.22) (EC 2.7.11.23) (Cyclin-dependent kinase 9) - Mus musculus (Mouse)                                                                                                                 | 43133  | 18 | 0  | 4  | 0  |
| Q8CJF7 | AT-hook-containing transcription factor 1 (Embryonic large molecule derived from yolk sac) - Mus musculus (Mouse)                                                                                                               | 249489 | 18 | 20 | 19 | 9  |
| Q8K348 | Activin receptor type 1C precursor (EC 2.7.11.30) (ACTR-IC) (Activin receptor-like kinase 7) (ALK-7) - Mus musculus (Mouse)                                                                                                     | 55903  | 18 | 0  | 4  | 0  |
| Q9QZM9 | F-box only protein 16 - Mus musculus (Mouse)                                                                                                                                                                                    | 39362  | 18 | 0  | 4  | 0  |

|        |                                                                                                                                                                                                                                                    |        |    |    |    |    |
|--------|----------------------------------------------------------------------------------------------------------------------------------------------------------------------------------------------------------------------------------------------------|--------|----|----|----|----|
| Q99KE1 | NAD-dependent malic enzyme, mitochondrial precursor (EC 1.1.1.38) (NAD-ME) (Malic enzyme 2) - Mus musculus (Mouse)                                                                                                                                 | 66441  | 18 | 0  | 5  | 0  |
| Q99KF0 | Caspase recruitment domain-containing protein 14 (Bcl10-interacting MAGUK protein 2) (Bimp2) - Mus musculus (Mouse)                                                                                                                                | 114737 | 18 | 0  | 15 | 0  |
| Q925J9 | Peroxisome proliferator-activated receptor-binding protein (PBP) (PPAR-binding protein) (Thyroid hormone receptor-associated protein complex 220 kDa component) (Trap220) (Thyroid receptor-interacting protein 2) (TRIP-2) - Mus musculus (Mouse) | 168006 | 18 | 0  | 9  | 0  |
| Q35955 | Proteasome subunit beta type 10 precursor (EC 3.4.25.1) (Proteasome MECL-1) (Macropain subunit MECL-1) (Multicatalytic endopeptidase complex subunit MECL-1) - Mus musculus (Mouse)                                                                | 29330  | 18 | 0  | 3  | 0  |
| Q8C4M7 | Centromere protein U (CENP-U) (MLF1-interacting protein) - Mus musculus (Mouse)                                                                                                                                                                    | 46570  | 18 | 0  | 10 | 0  |
| Q7TNB4 | Protein maestro (Male-specific transcription in the developing reproductive organs) - Mus musculus (Mouse)                                                                                                                                         | 28720  | 18 | 0  | 11 | 0  |
| Q05921 | 2-5A-dependent ribonuclease (EC 3.1.26.-) (2-5A-dependent RNase) (Ribonuclease L) (RNase L) (Ribonuclease 4) - Mus musculus (Mouse)                                                                                                                | 84021  | 18 | 23 | 19 | 14 |
| Q80Y56 | Rabenosyn-5 (FYVE finger-containing Rab5 effector protein rabenosyn-5) (Zinc finger FYVE domain-containing protein 20) - Mus musculus (Mouse)                                                                                                      | 89292  | 18 | 0  | 10 | 0  |
| P47878 | Insulin-like growth factor-binding protein 3 precursor (IGFBP-3) (IBP-3) (IGF-binding protein 3) - Mus musculus (Mouse)                                                                                                                            | 32726  | 18 | 26 | 5  | 10 |
| Q7TPM3 | Tripartite motif-containing protein 17 - Mus musculus (Mouse)                                                                                                                                                                                      | 55683  | 18 | 18 | 7  | 9  |
| Q8BZ39 | Neuromedin-U receptor 2 (NMU-R2) - Mus musculus (Mouse)                                                                                                                                                                                            | 45425  | 18 | 0  | 17 | 0  |



|        |                                                                                                                                                                             |        |    |    |     |    |
|--------|-----------------------------------------------------------------------------------------------------------------------------------------------------------------------------|--------|----|----|-----|----|
| Q9JMC8 | Band 4.1-like protein 4B (Protein EHM2) - Mus musculus (Mouse)                                                                                                              | 60110  | 18 | 0  | 4   | 0  |
| P61294 | Ras-related protein Rab-6B - Mus musculus (Mouse)                                                                                                                           | 23561  | 18 | 53 | 10  | 7  |
| Q64FW2 | All-trans-retinol 13,14-reductase precursor (EC 1.3.99.23) (All-trans-13,14-dihydroretinol saturase) (RetSat) - Mus musculus (Mouse)                                        | 67876  | 18 | 0  | 11  | 0  |
| P56183 | NNP-1 protein (Novel nuclear protein 1) (Nop52) - Mus musculus (Mouse)                                                                                                      | 54857  | 18 | 21 | 14  | 13 |
| P57016 | Ladinin 1 (Lad-1) (Linear IgA disease autoantigen) - Mus musculus (Mouse)                                                                                                   | 58886  | 18 | 0  | 8   | 0  |
| Q9D2Z8 | Kinesin-like protein KIF12 - Mus musculus (Mouse)                                                                                                                           | 71687  | 18 | 0  | 8   | 0  |
| P21958 | Antigen peptide transporter 1 (APT1) (Peptide transporter TAP1) (ATP-binding cassette sub-family B member 2) (Histocompatibility antigen modifier 1) - Mus musculus (Mouse) | 79297  | 18 | 0  | 7   | 0  |
| P29754 | Type-1A angiotensin II receptor (AT1) (AT1A) - Mus musculus (Mouse)                                                                                                         | 41399  | 18 | 0  | 122 | 0  |
| P01723 | Ig lambda-1 chain V region precursor - Mus musculus (Mouse)                                                                                                                 | 12328  | 18 | 0  | 2   | 0  |
| Q62513 | Zinc finger protein 260 (Zfp-260) - Mus musculus (Mouse)                                                                                                                    | 47952  | 18 | 0  | 6   | 0  |
| Q07916 | POU domain, class 6, transcription factor 1 (Octamer-binding transcription factor EMB) (Transcription regulatory protein MCP-1) - Mus musculus (Mouse)                      | 33002  | 18 | 0  | 5   | 0  |
| P52792 | Glucokinase (EC 2.7.1.2) (Hexokinase-4) (Hexokinase type IV) (HK IV) (HK4) (Hexokinase-D) - Mus musculus (Mouse)                                                            | 52739  | 18 | 16 | 12  | 6  |
| Q64339 | Ubiquitin cross-reactive protein precursor (Interferon-stimulated protein 15) (IP17) - Mus musculus (Mouse)                                                                 | 18057  | 18 | 0  | 5   | 0  |
| Q66JQ7 | Protein CASC5 (Cancer susceptibility candidate gene 5 protein homolog) - Mus musculus (Mouse)                                                                               | 180895 | 18 | 0  | 25  | 0  |

|        |                                                                                                                                                                                                 |        |    |    |    |    |
|--------|-------------------------------------------------------------------------------------------------------------------------------------------------------------------------------------------------|--------|----|----|----|----|
| Q8R0Y6 | 10-formyltetrahydrofolate dehydrogenase (EC 1.5.1.6) (10-FTHFDH) (Aldehyde dehydrogenase 1 family member L1) - Mus musculus (Mouse)                                                             | 99502  | 18 | 0  | 18 | 0  |
| Q8R0I0 | Angiotensin-converting enzyme 2 precursor (EC 3.4.17.-) (ACE-related carboxypeptidase) - Mus musculus (Mouse)                                                                                   | 92765  | 18 | 0  | 6  | 0  |
| Q9ESK9 | RB1-inducible coiled-coil protein 1 (Coiled-coil-forming protein 1) (LaXp180 protein) - Mus musculus (Mouse)                                                                                    | 184302 | 18 | 0  | 24 | 0  |
| Q925E0 | Gamma-2-syntrophin (G2SYN) (Syntrophin 5) (SYN5) - Mus musculus (Mouse)                                                                                                                         | 60358  | 18 | 0  | 3  | 0  |
| Q8VHY0 | Chondroitin sulfate proteoglycan 4 precursor (Chondroitin sulfate proteoglycan NG2) (AN2 proteoglycan) - Mus musculus (Mouse)                                                                   | 252992 | 18 | 0  | 19 | 0  |
| P98192 | Dihydroxyacetone phosphate acyltransferase (EC 2.3.1.42) (DHAP-AT) (DAP-AT) (Glycerone-phosphate O-acyltransferase) (Acyl-CoA:dihydroxyacetonephosphat eacyltransferase) - Mus musculus (Mouse) | 77504  | 18 | 16 | 7  | 3  |
| Q8CFH6 | Serine/threonine-protein kinase SNF1-like kinase 2 (EC 2.7.11.1) (Salt-inducible kinase 2) - Mus musculus (Mouse)                                                                               | 105044 | 18 | 0  | 3  | 0  |
| P42703 | Leukemia inhibitory factor receptor precursor (LIF receptor) (LIF-R) (D-factor/LIF receptor) (CD118 antigen) - Mus musculus (Mouse)                                                             | 123808 | 18 | 17 | 53 | 67 |
| Q9ES64 | Harmonin (Usher syndrome type-1C protein homolog) (PDZ domain-containing protein) - Mus musculus (Mouse)                                                                                        | 102620 | 18 | 15 | 5  | 8  |
| Q8CJH3 | Plexin-B1 precursor - Mus musculus (Mouse)                                                                                                                                                      | 234579 | 18 | 0  | 23 | 0  |
| Q8VEL9 | GTP-binding protein REM 2 (Rad and Gem-like GTP-binding protein 2) - Mus musculus (Mouse)                                                                                                       | 30235  | 18 | 16 | 3  | 5  |
| P59242 | Cingulin - Mus musculus (Mouse)                                                                                                                                                                 | 136593 | 18 | 21 | 30 | 32 |

|        |                                                                                                                                                                                              |        |    |    |    |    |
|--------|----------------------------------------------------------------------------------------------------------------------------------------------------------------------------------------------|--------|----|----|----|----|
| Q88741 | Ganglioside-induced differentiation-associated protein 1 (GDAP1) - Mus musculus (Mouse)                                                                                                      | 41513  | 18 | 0  | 11 | 0  |
| Q8VE33 | Ganglioside-induced differentiation-associated protein 1-like 1 (GDAP1-L1) - Mus musculus (Mouse)                                                                                            | 42633  | 18 | 0  | 6  | 0  |
| Q9DC16 | Endoplasmic reticulum-Golgi intermediate compartment protein 1 (ER-Golgi intermediate compartment 32 kDa protein) (ERGIC-32) - Mus musculus (Mouse)                                          | 32941  | 18 | 19 | 4  | 2  |
| Q99NB9 | Splicing factor 3B subunit 1 (Spliceosome-associated protein 155) (SAP 155) (SF3b155) (Pre-mRNA-splicing factor SF3b 155 kDa subunit) - Mus musculus (Mouse)                                 | 146465 | 18 | 0  | 11 | 0  |
| Q62178 | Semaphorin-4A precursor (Semaphorin B) (Sema B) - Mus musculus (Mouse)                                                                                                                       | 84375  | 18 | 0  | 8  | 0  |
| Q9JHU2 | Palmdelphin - Mus musculus (Mouse)                                                                                                                                                           | 62833  | 18 | 0  | 25 | 0  |
| Q89017 | Legumain precursor (EC 3.4.22.34) (Asparaginyl endopeptidase) (Protease, cysteine 1) - Mus musculus (Mouse)                                                                                  | 49740  | 18 | 0  | 23 | 0  |
| Q921M7 | Protein FAM49B - Mus musculus (Mouse)                                                                                                                                                        | 37038  | 18 | 0  | 5  | 0  |
| Q61080 | Forkhead box protein F1 (Forkhead-related protein FKHL5) (Forkhead-related transcription factor 1) (FREAC-1) (Hepatocyte nuclear factor 3 forkhead homolog 8) (HFH-8) - Mus musculus (Mouse) | 38174  | 18 | 0  | 3  | 0  |
| Q9JJ28 | Protein flightless-1 homolog - Mus musculus (Mouse)                                                                                                                                          | 146137 | 18 | 0  | 5  | 0  |
| P16015 | Carbonic anhydrase 3 (EC 4.2.1.1) (Carbonic anhydrase III) (Carbonate dehydratase III) (CA-III) - Mus musculus (Mouse)                                                                       | 29633  | 18 | 17 | 9  | 12 |
| Q8VBZ3 | Cleft lip and palate transmembrane protein 1 homolog (Thymic epithelial cell surface antigen) - Mus musculus (Mouse)                                                                         | 75585  | 18 | 0  | 2  | 0  |

|        |                                                                                                                                                                                                                                           |        |    |    |    |    |
|--------|-------------------------------------------------------------------------------------------------------------------------------------------------------------------------------------------------------------------------------------------|--------|----|----|----|----|
| Q00780 | Collagen alpha-1(VIII) chain precursor - Mus musculus (Mouse)                                                                                                                                                                             | 73673  | 18 | 0  | 5  | 0  |
| Q61824 | ADAM 12 precursor (EC 3.4.24.-) (A disintegrin and metalloproteinase domain 12) (Meltrin alpha) - Mus musculus (Mouse)                                                                                                                    | 101217 | 18 | 20 | 7  | 5  |
| Q88572 | Low-density lipoprotein receptor-related protein 6 precursor - Mus musculus (Mouse)                                                                                                                                                       | 183162 | 18 | 0  | 7  | 0  |
| Q9QYH9 | Tumor necrosis factor ligand superfamily member 14 (CD258 antigen) [Contains: Tumor necrosis factor ligand superfamily member 14, membrane form; Tumor necrosis factor ligand superfamily member 14, soluble form] - Mus musculus (Mouse) | 26493  | 18 | 0  | 3  | 0  |
| Q80U70 | Polycomb protein Suz12 (Suppressor of zeste 12 protein homolog) - Mus musculus (Mouse)                                                                                                                                                    | 83715  | 18 | 19 | 6  | 5  |
| Q60631 | Growth factor receptor-bound protein 2 (Adapter protein GRB2) (SH2/SH3 adapter GRB2) - Mus musculus (Mouse)                                                                                                                               | 25336  | 18 | 19 | 2  | 4  |
| Q8K4J2 | Transcription factor COE4 (Early B-cell factor 4) (EBF-4) (Olf-1/EBF-like 4) (OE-4) (O/E-4) - Mus musculus (Mouse)                                                                                                                        | 65267  | 18 | 16 | 12 | 13 |
| Q8R5C5 | Beta-centractin (Actin-related protein 1B) (ARP1B) - Mus musculus (Mouse)                                                                                                                                                                 | 42369  | 18 | 0  | 5  | 0  |
| Q8BP86 | snRNA-activating protein complex subunit 4 (SNAPc subunit 4) (snRNA-activating protein complex 190 kDa subunit) (SNAPc 190 kDa subunit) - Mus musculus (Mouse)                                                                            | 148348 | 18 | 0  | 8  | 0  |
| Q8BGA3 | Leucine-rich repeat transmembrane neuronal protein 2 precursor - Mus musculus (Mouse)                                                                                                                                                     | 59690  | 18 | 0  | 2  | 0  |
| Q8BLA8 | Transient receptor potential cation channel subfamily A member 1 (Ankyrin-like with transmembrane domains protein 1) - Mus musculus (Mouse)                                                                                               | 130151 | 17 | 0  | 15 | 0  |

|        |                                                                                                                                                                                                                                                           |        |    |    |    |    |
|--------|-----------------------------------------------------------------------------------------------------------------------------------------------------------------------------------------------------------------------------------------------------------|--------|----|----|----|----|
| Q7TQG1 | Pleckstrin homology domain-containing family A member 6 (Phosphoinositol 3-phosphate-binding protein 3) (PEPP-3) - Mus musculus (Mouse)                                                                                                                   | 131688 | 17 | 37 | 14 | 21 |
| Q8BHT7 | Ran GTPase-activating protein 1 - Mus musculus (Mouse)                                                                                                                                                                                                    | 64090  | 17 | 23 | 8  | 8  |
| P70365 | Nuclear receptor coactivator 1 (EC 2.3.1.48) (NCoA-1) (Steroid receptor coactivator 1) (SRC-1) (Nuclear receptor coactivator protein 1) (mNRC-1) - Mus musculus (Mouse)                                                                                   | 158285 | 17 | 20 | 9  | 15 |
| Q8C8N2 | Uncharacterized protein C9orf126 homolog - Mus musculus (Mouse)                                                                                                                                                                                           | 70630  | 17 | 0  | 4  | 0  |
| Q9Z2W1 | Serine/threonine-protein kinase 25 (EC 2.7.11.1) (Sterile 20/oxidant stress-response kinase 1) (Ste20/oxidant stress response kinase 1) (SOK-1) (Ste20-like kinase) - Mus musculus (Mouse)                                                                | 48374  | 17 | 0  | 5  | 0  |
| P01027 | Complement C3 precursor (HSE-MSF) [Contains: Complement C3 beta chain; Complement C3 alpha chain; C3a anaphylatoxin; Complement C3b alpha~ chain; Complement C3c alpha~ chain fragment 1; Complement C3dg fragment; Complement C3g fragment; Complement C | 187904 | 17 | 0  | 42 | 0  |
| Q99ME9 | Nucleolar GTP-binding protein 1 (Chronic renal failure gene protein) (GTP-binding protein NGB) - Mus musculus (Mouse)                                                                                                                                     | 74465  | 17 | 0  | 8  | 0  |
| P70336 | Rho-associated protein kinase 2 (EC 2.7.11.1) (Rho-associated, coiled-coil-containing protein kinase 2) (p164 ROCK-2) - Mus musculus (Mouse)                                                                                                              | 161625 | 17 | 21 | 37 | 27 |
| P54071 | Isocitrate dehydrogenase [NADP], mitochondrial precursor (EC 1.1.1.42) (Oxalosuccinate decarboxylase) (IDH) (NADP(+)-specific ICDH) (IDP) (ICD-M) - Mus musculus (Mouse)                                                                                  | 59419  | 17 | 18 | 9  | 6  |

|        |                                                                                                                                                                                                                                                           |        |    |   |    |   |
|--------|-----------------------------------------------------------------------------------------------------------------------------------------------------------------------------------------------------------------------------------------------------------|--------|----|---|----|---|
| P11798 | Calcium/calmodulin-dependent protein kinase type II alpha chain (EC 2.7.11.17) (CaM-kinase II alpha chain) (CaM kinase II alpha subunit) (CaMK-II subunit alpha) - Mus musculus (Mouse)                                                                   | 54651  | 17 | 0 | 6  | 0 |
| Q923T9 | Calcium/calmodulin-dependent protein kinase type II gamma chain (EC 2.7.11.17) (CaM-kinase II gamma chain) (CaM kinase II gamma subunit) (CaMK-II subunit gamma) - Mus musculus (Mouse)                                                                   | 60254  | 17 | 0 | 5  | 0 |
| Q921F4 | Heterogeneous nuclear ribonucleoprotein L-like - Mus musculus (Mouse)                                                                                                                                                                                     | 64940  | 17 | 0 | 14 | 0 |
| O35219 | Potassium voltage-gated channel subfamily H member 2 (Voltage-gated potassium channel subunit Kv11.1) (Ether-a-go-go-related gene potassium channel 1) (ERG1) (MERG) (Merg1) (Ether-a-go-go-related protein 1) (Eag-related protein 1) - Mus musculus (Mo | 128117 | 17 | 0 | 12 | 0 |
| Q8R080 | G2 and S phase expressed protein 1 (Gtse-1) (B99 protein) - Mus musculus (Mouse)                                                                                                                                                                          | 79160  | 17 | 0 | 14 | 0 |
| P50580 | Proliferation-associated protein 2G4 (Proliferation-associated protein 1) (Protein p38-2G4) (Mpp1) (IRES-specific cellular trans-acting factor 45 kDa) (ITAF45) - Mus musculus (Mouse)                                                                    | 44013  | 17 | 0 | 8  | 0 |
| Q99LE6 | ATP-binding cassette sub-family F member 2 - Mus musculus (Mouse)                                                                                                                                                                                         | 72306  | 17 | 0 | 10 | 0 |
| O89084 | cAMP-specific 3~,5~-cyclic phosphodiesterase 4A (EC 3.1.4.17) - Mus musculus (Mouse)                                                                                                                                                                      | 94126  | 17 | 0 | 9  | 0 |
| Q64347 | Chloride channel protein, skeletal muscle (Chloride channel protein 1) (ClC-1) - Mus musculus (Mouse)                                                                                                                                                     | 111120 | 17 | 0 | 6  | 0 |
| Q9D2F7 | Nuclear pore membrane glycoprotein 210-like precursor (Nucleoporin 210 kDa-like) - Mus musculus (Mouse)                                                                                                                                                   | 209594 | 17 | 0 | 18 | 0 |

|        |                                                                                                                                                                                                        |        |    |    |    |    |
|--------|--------------------------------------------------------------------------------------------------------------------------------------------------------------------------------------------------------|--------|----|----|----|----|
| Q8BJS4 | Sad1/unc-84-like protein 2 - Mus musculus (Mouse)                                                                                                                                                      | 78318  | 17 | 0  | 10 | 0  |
| P35546 | Proto-oncogene tyrosine-protein kinase receptor ret precursor (EC 2.7.10.1) (C-ret) - Mus musculus (Mouse)                                                                                             | 125791 | 17 | 0  | 15 | 0  |
| P15327 | Bisphosphoglycerate mutase (EC 5.4.2.4) (2,3-bisphosphoglycerate mutase, erythrocyte) (2,3-bisphosphoglycerate synthase) (BPGM) (EC 5.4.2.1) (EC 3.1.3.13) (BPG-dependent PGAM) - Mus musculus (Mouse) | 30131  | 17 | 23 | 9  | 7  |
| Q99LJ2 | Ankyrin repeat and BTB/POZ domain-containing protein 1 - Mus musculus (Mouse)                                                                                                                          | 55163  | 17 | 0  | 5  | 0  |
| Q8K4L0 | ATP-dependent RNA helicase DDX54 (EC 3.6.1.-) (DEAD box protein 54) - Mus musculus (Mouse)                                                                                                             | 98029  | 17 | 21 | 27 | 24 |
| Q8K0G8 | RNA-binding protein 35B (RNA-binding motif protein 35B) - Mus musculus (Mouse)                                                                                                                         | 78110  | 17 | 0  | 15 | 0  |
| Q511X5 | RelA-associated inhibitor (Inhibitor of ASPP protein) (Protein iASPP) (PPP1R13B-like protein) (NFkB-interacting protein 1) - Mus musculus (Mouse)                                                      | 89263  | 17 | 0  | 10 | 0  |
| Q91WD7 | Kinesin family member 18A - Mus musculus (Mouse)                                                                                                                                                       | 102126 | 17 | 0  | 11 | 0  |
| Q6PCM1 | JmjC domain-containing histone demethylation protein 2A (EC 1.14.11.-) (Jumonji domain-containing protein 1A) - Mus musculus (Mouse)                                                                   | 149978 | 17 | 0  | 21 | 0  |
| Q9D687 | Sodium-dependent neutral amino acid transporter B(0) (System B(0) neutral amino acid transporter) (B(0)AT1) (Solute carrier family 6 member 19) - Mus musculus (Mouse)                                 | 72403  | 17 | 0  | 2  | 0  |
| Q64487 | Receptor-type tyrosine-protein phosphatase delta precursor (EC 3.1.3.48) (Protein-tyrosine phosphatase delta) (R-PTP-delta) - Mus musculus (Mouse)                                                     | 213316 | 17 | 0  | 36 | 0  |
| Q61089 | Frizzled-6 precursor (Fz-6) (mFz6) - Mus musculus (Mouse)                                                                                                                                              | 80740  | 17 | 17 | 17 | 7  |

|        |                                                                                                                                                                                                                                               |       |    |    |    |   |
|--------|-----------------------------------------------------------------------------------------------------------------------------------------------------------------------------------------------------------------------------------------------|-------|----|----|----|---|
| Q9QZL0 | Receptor-interacting serine/threonine-protein kinase 3 (EC 2.7.11.1) (RIP-like protein kinase 3) (Receptor-interacting protein 3) (RIP-3) (mRIP3) - Mus musculus (Mouse)                                                                      | 53816 | 17 | 0  | 8  | 0 |
| Q9CRA5 | Golgi phosphoprotein 3 (Coat-protein GPP34) - Mus musculus (Mouse)                                                                                                                                                                            | 34017 | 17 | 0  | 4  | 0 |
| Q8VBY2 | Calcium/calmodulin-dependent protein kinase kinase 1 (EC 2.7.11.17) (Calcium/calmodulin-dependent protein kinase kinase alpha) (CaM-kinase kinase alpha) (CaM-KK alpha) (CaMKK alpha) (CaMKK 1) (CaM-kinase IV kinase) - Mus musculus (Mouse) | 56430 | 17 | 0  | 8  | 0 |
| P47740 | Fatty aldehyde dehydrogenase (EC 1.2.1.3) (Aldehyde dehydrogenase, microsomal) (Aldehyde dehydrogenase family 3 member A2) (Aldehyde dehydrogenase 10) - Mus musculus (Mouse)                                                                 | 54364 | 17 | 0  | 7  | 0 |
| Q9DB70 | FUN14 domain-containing protein 1 - Mus musculus (Mouse)                                                                                                                                                                                      | 17205 | 17 | 20 | 6  | 3 |
| Q99K30 | Epidermal growth factor receptor kinase substrate 8-like protein 2 (Epidermal growth factor receptor pathway substrate 8-related protein 2) (EPS8-like protein 2) - Mus musculus (Mouse)                                                      | 82691 | 17 | 0  | 9  | 0 |
| O35310 | Heparan sulfate glucosamine 3-O-sulfotransferase 1 precursor (EC 2.8.2.23) (Heparan sulfate D-glucosaminyl 3-O-sulfotransferase 1) (Heparan sulfate 3-O-sulfotransferase 1) - Mus musculus (Mouse)                                            | 35991 | 17 | 18 | 7  | 9 |
| Q8K0B2 | LMBR1 domain-containing protein 1 (Protein N90b) - Mus musculus (Mouse)                                                                                                                                                                       | 61707 | 17 | 0  | 3  | 0 |
| O08970 | Tuftelin - Mus musculus (Mouse)                                                                                                                                                                                                               | 44720 | 17 | 0  | 13 | 0 |
| Q8VBT0 | Thioredoxin domain-containing protein 1 precursor - Mus musculus (Mouse)                                                                                                                                                                      | 31775 | 17 | 0  | 3  | 0 |



|        |                                                                                                                                                                                 |        |    |    |    |    |
|--------|---------------------------------------------------------------------------------------------------------------------------------------------------------------------------------|--------|----|----|----|----|
| Q8BXR9 | Oxysterol-binding protein-related protein 6 (OSBP-related protein 6) (ORP-6) - Mus musculus (Mouse)                                                                             | 109992 | 17 | 0  | 30 | 0  |
| Q9CPY3 | Sororin (Cell division cycle-associated protein 5) - Mus musculus (Mouse)                                                                                                       | 29144  | 17 | 18 | 27 | 59 |
| P97864 | Caspase-7 precursor (EC 3.4.22.-) (CASP-7) (LICE2 cysteine protease) (Apoptotic protease Mch-3) [Contains: Caspase-7 subunit p20; Caspase-7 subunit p11] - Mus musculus (Mouse) | 34666  | 17 | 0  | 5  | 0  |
| Q9JLB4 | Cubilin precursor (Intrinsic factor-cobalamin receptor) - Mus musculus (Mouse)                                                                                                  | 407652 | 17 | 17 | 11 | 16 |
| Q9CPW4 | Actin-related protein 2/3 complex subunit 5 (ARP2/3 complex 16 kDa subunit) (p16-ARC) - Mus musculus (Mouse)                                                                    | 16335  | 17 | 0  | 9  | 0  |
| Q9D9W6 | Uncharacterized protein C6orf146 homolog - Mus musculus (Mouse)                                                                                                                 | 47253  | 17 | 16 | 14 | 8  |
| Q8VBX6 | Multiple PDZ domain protein (Multi-PDZ domain protein 1) - Mus musculus (Mouse)                                                                                                 | 220115 | 17 | 29 | 38 | 28 |
| Q8CHB8 | Tubulin--tyrosine ligase-like protein 5 - Mus musculus (Mouse)                                                                                                                  | 148465 | 17 | 0  | 16 | 0  |
| Q9JJF3 | Nucleolar protein 66 - Mus musculus (Mouse)                                                                                                                                     | 67830  | 17 | 0  | 18 | 0  |
| O09126 | Semaphorin-4D precursor (Semaphorin J) (Sema J) (Semaphorin C-like 2) (M-Sema G) - Mus musculus (Mouse)                                                                         | 96965  | 17 | 0  | 25 | 0  |
| Q9DAT5 | tRNA (5-methylaminomethyl-2-thiouridylate)-methyltransferase (EC 2.1.1.61) - Mus musculus (Mouse)                                                                               | 47780  | 17 | 0  | 3  | 0  |
| Q8K2C6 | NAD-dependent deacetylase sirtuin-5 (EC 3.5.1.-) (SIR2-like protein 5) - Mus musculus (Mouse)                                                                                   | 34854  | 17 | 0  | 2  | 0  |
| Q2VLH6 | Scavenger receptor cysteine-rich type 1 protein M130 precursor (CD163 antigen) [Contains: Soluble CD163 (sCD163)] - Mus musculus (Mouse)                                        | 125095 | 17 | 15 | 9  | 12 |

|        |                                                                                                                                                                                    |        |    |    |    |    |
|--------|------------------------------------------------------------------------------------------------------------------------------------------------------------------------------------|--------|----|----|----|----|
| P55041 | GTP-binding protein GEM (GTP-binding mitogen-induced T-cell protein) (RAS-like protein KIR) - Mus musculus (Mouse)                                                                 | 34160  | 17 | 16 | 12 | 5  |
| Q925T6 | Glutamate receptor-interacting protein 1 (GRIP1 protein) - Mus musculus (Mouse)                                                                                                    | 122894 | 17 | 0  | 34 | 0  |
| P30415 | NK-tumor recognition protein (Natural-killer cells cyclophilin-related protein) (NK-TR protein) - Mus musculus (Mouse)                                                             | 164425 | 17 | 0  | 15 | 0  |
| Q9JMA1 | Ubiquitin carboxyl-terminal hydrolase 14 (EC 3.1.2.15) (Ubiquitin thioesterase 14) (Ubiquitin-specific-processing protease 14) (Deubiquitinating enzyme 14) - Mus musculus (Mouse) | 56422  | 17 | 22 | 6  | 4  |
| Q8BHI9 | Serine/threonine-protein kinase NIM1 (EC 2.7.11.1) - Mus musculus (Mouse)                                                                                                          | 50145  | 17 | 0  | 3  | 0  |
| Q00342 | FL cytokine receptor precursor (EC 2.7.10.1) (Tyrosine-protein kinase receptor flk-2) (Fetal liver kinase 2) (Tyrosine-protein kinase FLT3) (CD135 antigen) - Mus musculus (Mouse) | 114506 | 17 | 34 | 7  | 10 |
| P10284 | Homeobox protein Hox-B4 (Hox-2.6) - Mus musculus (Mouse)                                                                                                                           | 27844  | 17 | 0  | 2  | 0  |
| Q9Z1X4 | Interleukin enhancer-binding factor 3 - Mus musculus (Mouse)                                                                                                                       | 96360  | 17 | 0  | 13 | 0  |
| Q8K330 | Protein phosphatase Slingshot homolog 3 (EC 3.1.3.48) (EC 3.1.3.16) (SSH-3L) (mSSH-3L) - Mus musculus (Mouse)                                                                      | 72468  | 17 | 17 | 71 | 76 |
| Q60767 | Lymphocyte antigen 75 precursor (Ly-75) (DEC-205) (CD205 antigen) - Mus musculus (Mouse)                                                                                           | 200827 | 17 | 16 | 21 | 26 |
| P51612 | DNA-repair protein complementing XP-C cells homolog (Xeroderma pigmentosum group C-complementing protein homolog) (p125) - Mus musculus (Mouse)                                    | 105540 | 17 | 0  | 9  | 0  |

|        |                                                                                                                                                                                                                          |        |    |    |    |   |
|--------|--------------------------------------------------------------------------------------------------------------------------------------------------------------------------------------------------------------------------|--------|----|----|----|---|
| P97751 | Vasoactive intestinal polypeptide receptor 1 precursor (VIP-R-1) (VPAC1) (Pituitary adenylate cyclase-activating polypeptide type II receptor) (PACAP type II receptor) (PACAP-R-2) - Mus musculus (Mouse)               | 53031  | 17 | 0  | 8  | 0 |
| Q60780 | Growth-arrest-specific protein 7 (GAS-7) - Mus musculus (Mouse)                                                                                                                                                          | 48428  | 17 | 0  | 13 | 0 |
| Q6ZQJ5 | DNA2-like helicase (EC 3.6.1.-) (DNA replication ATP-dependent helicase-like homolog) - Mus musculus                                                                                                                     | 120683 | 17 | 0  | 15 | 0 |
| P09528 | Ferritin heavy chain (EC 1.16.3.1) (Ferritin H subunit) - Mus musculus (Mouse)                                                                                                                                           | 21224  | 17 | 0  | 8  | 0 |
| Q9WVA3 | Mitotic checkpoint protein BUB3 (WD repeat type I transmembrane protein A72.5) - Mus musculus (Mouse)                                                                                                                    | 37360  | 17 | 42 | 2  | 4 |
| Q9Z1K5 | Protein ariadne-1 homolog (ARI-1) (Ubiquitin-conjugating enzyme E2-binding protein 1) (UbcH7-binding protein) (UbcM4-interacting protein 77) - Mus musculus (Mouse)                                                      | 65799  | 17 | 0  | 5  | 0 |
| Q923P0 | Collagen alpha-1(XX) chain (Fragment) - Mus musculus (Mouse)                                                                                                                                                             | 81368  | 17 | 0  | 12 | 0 |
| O89019 | Inversin (Inversion of embryo turning protein) (Nephrocystin-2) - Mus musculus (Mouse)                                                                                                                                   | 118481 | 17 | 26 | 11 | 5 |
| Q9CWV7 | Zinc finger SWIM domain-containing protein 1 - Mus musculus (Mouse)                                                                                                                                                      | 52075  | 17 | 0  | 6  | 0 |
| P02319 | Sperm protamine-P1 (Cysteine-rich protamine) - Mus musculus (Mouse)                                                                                                                                                      | 7467   | 17 | 0  | 3  | 0 |
| Q3V125 | Cancer/testis antigen KM-HN-1 homolog - Mus musculus (Mouse)                                                                                                                                                             | 96809  | 17 | 0  | 17 | 0 |
| P52592 | Sphingosine 1-phosphate receptor Edg-5 (S1P receptor Edg-5) (Lysophospholipid receptor B2) (Endothelial differentiation G-protein coupled receptor 5) (Sphingosine 1-phosphate receptor 2) (S1P2) - Mus musculus (Mouse) | 39416  | 17 | 0  | 6  | 0 |

|        |                                                                                                                                                                                                                 |        |    |    |    |    |
|--------|-----------------------------------------------------------------------------------------------------------------------------------------------------------------------------------------------------------------|--------|----|----|----|----|
| Q99J39 | Malonyl-CoA decarboxylase, mitochondrial precursor (EC 4.1.1.9) (MCD) - Mus musculus (Mouse)                                                                                                                    | 55272  | 17 | 0  | 8  | 0  |
| Q9JLV1 | BAG family molecular chaperone regulator 3 (BCL-2-binding athanogene-3) (BAG-3) (Bcl-2-binding protein Bis) - Mus musculus (Mouse)                                                                              | 62018  | 17 | 0  | 6  | 0  |
| P25962 | Beta-3 adrenergic receptor (Beta 3 adrenoceptor) (Beta-3 adrenoreceptor) - Mus musculus (Mouse)                                                                                                                 | 43549  | 17 | 0  | 4  | 0  |
| Q8BHK2 | Sodium channel subunit beta-3 precursor - Mus musculus (Mouse)                                                                                                                                                  | 25115  | 17 | 0  | 3  | 0  |
| Q9R1E0 | Forkhead box protein O1A (Forkhead in rhabdomyosarcoma) - Mus musculus (Mouse)                                                                                                                                  | 69914  | 17 | 0  | 4  | 0  |
| Q99N32 | Beta klotho (BetaKlotho) (Klotho beta-like protein) - Mus musculus (Mouse)                                                                                                                                      | 120854 | 17 | 20 | 25 | 22 |
| Q9WTR0 | Matrix metalloproteinase-16 precursor (EC 3.4.24.-) (MMP-16) (Membrane-type matrix metalloproteinase 3) (MT-MMP3) (MTMMP3) (Membrane-type-3 matrix metalloproteinase) (MT3-MMP) (MT3MMP) - Mus musculus (Mouse) | 70094  | 17 | 36 | 11 | 10 |
| Q9DC53 | Copine-8 (Copine VIII) - Mus musculus (Mouse)                                                                                                                                                                   | 63653  | 17 | 0  | 10 | 0  |
| Q9JJA7 | Cyclin-L2 (Cyclin Ania-6b) (Paneth cell-enhanced expression protein) (PCEE) - Mus musculus (Mouse)                                                                                                              | 58539  | 17 | 0  | 9  | 0  |
| Q9Z140 | Copine-6 (Copine VI) (Neuronal-copine) (N-copine) - Mus musculus (Mouse)                                                                                                                                        | 62597  | 17 | 0  | 8  | 0  |
| Q1RLL3 | Copine-9 (Copine IX) - Mus musculus (Mouse)                                                                                                                                                                     | 62269  | 17 | 0  | 18 | 0  |
| Q8JZW4 | Copine-5 (Copine V) - Mus musculus (Mouse)                                                                                                                                                                      | 66121  | 17 | 0  | 5  | 0  |
| P59108 | Copine-2 (Copine II) - Mus musculus (Mouse)                                                                                                                                                                     | 61681  | 17 | 0  | 7  | 0  |
| Q8BLR2 | Copine-4 (Copine IV) - Mus musculus (Mouse)                                                                                                                                                                     | 63223  | 17 | 0  | 5  | 0  |
| Q8R1F0 | Leydig cell tumor 10 kDa protein homolog - Mus musculus (Mouse)                                                                                                                                                 | 10191  | 17 | 0  | 1  | 0  |

|        |                                                                                                                                                                                 |        |    |    |    |    |
|--------|---------------------------------------------------------------------------------------------------------------------------------------------------------------------------------|--------|----|----|----|----|
| Q9EST3 | Eukaryotic translation initiation factor 4E transporter (eIF4E transporter) (4E-T) (Eukaryotic translation initiation factor 4E nuclear import factor 1) - Mus musculus (Mouse) | 108203 | 17 | 0  | 24 | 0  |
| Q99M28 | RNA-binding protein with serine-rich domain 1 - Mus musculus (Mouse)                                                                                                            | 34188  | 17 | 0  | 8  | 0  |
| P25918 | B-lymphocyte antigen CD19 precursor (Differentiation antigen CD19) - Mus musculus                                                                                               | 60582  | 17 | 0  | 1  | 0  |
| O70372 | Telomerase reverse transcriptase (EC 2.7.7.49) (Telomerase catalytic subunit) - Mus musculus (Mouse)                                                                            | 129892 | 17 | 0  | 12 | 0  |
| P97368 | Homeobox protein Meis3 (Meis1-related protein 2) - Mus musculus (Mouse)                                                                                                         | 42186  | 17 | 0  | 1  | 0  |
| Q9JJJ7 | Probable protein-cysteine N-palmitoyltransferase porcupine (EC 2.3.1.-) (mPORC) - Mus musculus (Mouse)                                                                          | 53101  | 17 | 0  | 5  | 0  |
| P59481 | VIP36-like protein precursor (Lectin, mannose-binding 2-like) (LMAN2-like protein) - Mus musculus (Mouse)                                                                       | 40027  | 17 | 0  | 3  | 0  |
| Q61584 | Fragile X mental retardation syndrome-related protein 1 (mFxr1p) - Mus musculus (Mouse)                                                                                         | 76517  | 17 | 16 | 33 | 38 |
| Q8K440 | ATP-binding cassette sub-family A member 8-B - Mus musculus (Mouse)                                                                                                             | 184347 | 17 | 0  | 13 | 0  |
| Q05915 | GTP cyclohydrolase I precursor (EC 3.5.4.16) (GTP-CH-I) - Mus musculus (Mouse)                                                                                                  | 27168  | 17 | 0  | 34 | 0  |
| Q6PD10 | Inositol hexaphosphate kinase 1 (EC 2.7.4.21) (InsP6 kinase 1) (Inositol hexakisphosphate kinase 1) - Mus musculus (Mouse)                                                      | 49902  | 17 | 0  | 3  | 0  |
| P20334 | Tumor necrosis factor receptor superfamily member 9 precursor (4-1BB ligand receptor) (T-cell antigen 4-1BB) (CD137 antigen) - Mus musculus (Mouse)                             | 29005  | 17 | 17 | 3  | 4  |
| Q8C0N1 | Kinesin-like protein KIF2B - Mus musculus (Mouse)                                                                                                                               | 76333  | 17 | 26 | 8  | 8  |

|        |                                                                                                                                                                                                           |        |    |    |    |    |
|--------|-----------------------------------------------------------------------------------------------------------------------------------------------------------------------------------------------------------|--------|----|----|----|----|
| Q9Z129 | ATP-dependent DNA helicase Q1 (EC 3.6.1.-) (DNA-dependent ATPase Q1) - Mus musculus (Mouse)                                                                                                               | 73475  | 17 | 27 | 13 | 22 |
| P97433 | Rho-guanine nucleotide exchange factor (Rho-interacting protein 2) (RhoGEF) (RIP2) - Mus musculus (Mouse)                                                                                                 | 192146 | 17 | 27 | 10 | 5  |
| P47856 | Glucosamine--fructose-6-phosphate aminotransferase [isomerizing] 1 (EC 2.6.1.16) (Hexosephosphate aminotransferase 1) (D-fructose-6-phosphate amidotransferase 1) (GFAT 1) (GFAT1) - Mus musculus (Mouse) | 79287  | 17 | 29 | 17 | 13 |
| Q9R0L1 | Heat shock factor protein 4 (HSF 4) (Heat shock transcription factor 4) (HSTF 4) (mHSF4) - Mus musculus (Mouse)                                                                                           | 53564  | 17 | 0  | 7  | 0  |
| P70352 | Ecto-ADP-ribosyltransferase 5 precursor (EC 2.4.2.31) (NAD(P)(+)--arginine ADP-ribosyltransferase 5) (Mono(ADP ribosyl)transferase 5) (YAC-2) - Mus musculus (Mouse)                                      | 34593  | 17 | 0  | 3  | 0  |
| Q8C7D2 | Protein cereblon (Protein PiL) - Mus musculus (Mouse)                                                                                                                                                     | 51703  | 17 | 29 | 6  | 3  |
| O35239 | Tyrosine-protein phosphatase non-receptor type 9 (EC 3.1.3.48) (Protein-tyrosine phosphatase MEG2) (PTPase-MEG2) - Mus musculus (Mouse)                                                                   | 68554  | 17 | 29 | 2  | 4  |
| O35618 | Mdm4 protein (p53-binding protein Mdm4) (Mdm2-like p53-binding protein) (Mdmx protein) (Double minute 4 protein) - Mus musculus (Mouse)                                                                   | 56041  | 17 | 29 | 5  | 6  |
| Q99MV7 | RING finger protein 17 - Mus musculus (Mouse)                                                                                                                                                             | 71122  | 17 | 0  | 10 | 0  |
| Q6PHN9 | Ras-related protein Rab-35 - Mus musculus (Mouse)                                                                                                                                                         | 23296  | 17 | 59 | 3  | 2  |
| P61028 | Ras-related protein Rab-8B - Mus musculus (Mouse)                                                                                                                                                         | 23759  | 17 | 59 | 4  | 5  |
| P55258 | Ras-related protein Rab-8A (Oncogene c-mel) - Mus musculus (Mouse)                                                                                                                                        | 23824  | 17 | 0  | 4  | 0  |

|        |                                                                                                                                                                                                                                                     |        |    |    |    |    |
|--------|-----------------------------------------------------------------------------------------------------------------------------------------------------------------------------------------------------------------------------------------------------|--------|----|----|----|----|
| Q8BTW8 | CDK5 regulatory subunit-associated protein 1 (CDK5 activator-binding protein C42) - Mus musculus (Mouse)                                                                                                                                            | 66980  | 17 | 15 | 7  | 6  |
| P42208 | Septin-2 (Protein NEDD5) (Neural precursor cell expressed developmentally down-regulated protein 5) - Mus musculus (Mouse)                                                                                                                          | 41727  | 17 | 0  | 6  | 0  |
| Q3TX51 | Leucine-rich repeat-containing protein 28 - Mus musculus (Mouse)                                                                                                                                                                                    | 42620  | 17 | 15 | 5  | 7  |
| P52293 | Importin alpha-2 subunit (Karyopherin alpha-2 subunit) (SRP1-alpha) (RAG cohort protein 1) (Pendulin) (Pore targeting complex 58 kDa subunit) (PTAC58) (Importin alpha P1) - Mus musculus (Mouse)                                                   | 58234  | 17 | 0  | 6  | 0  |
| Q68FF6 | ARF GTPase-activating protein GIT1 (G protein-coupled receptor kinase-interactor 1) (GRK-interacting protein 1) - Mus musculus (Mouse)                                                                                                              | 86046  | 17 | 24 | 9  | 8  |
| Q8VDM6 | Heterogeneous nuclear ribonucleoprotein U-like protein 1 - Mus musculus (Mouse)                                                                                                                                                                     | 96513  | 17 | 20 | 11 | 11 |
| P53564 | Homeobox protein cut-like 1 (CCAAT displacement protein) (CDP) (Homeobox protein Cux) - Mus musculus (Mouse)                                                                                                                                        | 165951 | 17 | 19 | 20 | 25 |
| Q9Z1B3 | 1-phosphatidylinositol-4,5-bisphosphate phosphodiesterase beta 1 (EC 3.1.4.11) (Phosphoinositide phospholipase C) (Phospholipase C-beta-1) (PLC-beta-1) (PLC-I) (PLC-154) - Mus musculus (Mouse)                                                    | 139093 | 17 | 0  | 11 | 0  |
| Q91Z92 | Beta-1,3-galactosyltransferase 6 (EC 2.4.1.134) (Beta 3GalT6) (Galactosylxylosylprotein 3-beta-galactosyltransferase) (UDP-Gal:betaGal beta 1,3-galactosyltransferase polypeptide 6) (Galactosyltransferase II) (GAG GalTII) - Mus musculus (Mouse) | 37397  | 17 | 0  | 4  | 0  |

|        |                                                                                                                                                                                                      |        |    |    |    |    |
|--------|------------------------------------------------------------------------------------------------------------------------------------------------------------------------------------------------------|--------|----|----|----|----|
| O09008 | Beta-1,3-N-acetylglucosaminyltransferase manic fringe (EC 2.4.1.222) (O-fucosylpeptide 3-beta-N-acetylglucosaminyltransferase) - Mus musculus (Mouse)                                                | 36747  | 17 | 0  | 5  | 0  |
| Q7TPN3 | GPI mannosyltransferase 2 (EC 2.4.1.-) (GPI mannosyltransferase II) (GPI-MT-II) (Phosphatidylinositol-glycan biosynthesis class V protein) (PIG-V) - Mus musculus (Mouse)                            | 56073  | 17 | 16 | 9  | 7  |
| Q5SX39 | Myosin-4 (Myosin heavy chain 4) (Myosin heavy chain 2b) (MyHC-2b) - Mus musculus (Mouse)                                                                                                             | 223632 | 17 | 0  | 42 | 0  |
| Q5SX40 | Myosin-1 (Myosin heavy chain 1) (Myosin heavy chain 2x) (MyHC-2x) (Myosin heavy chain, skeletal muscle, adult 1) - Mus musculus (Mouse)                                                              | 224116 | 17 | 0  | 20 | 0  |
| Q62077 | 1-phosphatidylinositol-4,5-bisphosphate phosphodiesterase gamma 1 (EC 3.1.4.11) (Phosphoinositide phospholipase C) (PLC-gamma-1) (Phospholipase C-gamma-1) (PLC-II) (PLC-148) - Mus musculus (Mouse) | 150999 | 17 | 18 | 12 | 10 |
| Q9CQM9 | Thioredoxin-like protein 2 (PKC-interacting cousin of thioredoxin) (PKC-theta-interacting protein) (PKCq-interacting protein) - Mus musculus (Mouse)                                                 | 38039  | 17 | 77 | 3  | 11 |
| Q6GQV7 | Erythroid differentiation-related factor 1 - Mus musculus (Mouse)                                                                                                                                    | 140343 | 17 | 0  | 15 | 0  |
| P15508 | Spectrin beta chain, erythrocyte (Beta-I spectrin) - Mus musculus (Mouse)                                                                                                                            | 245897 | 17 | 0  | 27 | 0  |
| Q61496 | Probable ATP-dependent RNA helicase DDX4 (EC 3.6.1.-) (DEAD box protein 4) (VASA homolog) (Mvh) - Mus musculus (Mouse)                                                                               | 77278  | 17 | 25 | 44 | 56 |
| Q9CXE0 | PR domain zinc finger protein 5 (PR domain-containing protein 5) - Mus musculus (Mouse)                                                                                                              | 71293  | 17 | 17 | 25 | 26 |



|        |                                                                                                                                                                                            |        |    |    |    |    |
|--------|--------------------------------------------------------------------------------------------------------------------------------------------------------------------------------------------|--------|----|----|----|----|
| P04443 | Hemoglobin subunit beta-H0 (Hemoglobin beta-H0 chain) (Beta-H0-globin) - Mus musculus (Mouse)                                                                                              | 16431  | 17 | 0  | 11 | 0  |
| Q8BUG5 | Calcyphosin-2 (Calcyphosine-2) - Mus musculus (Mouse)                                                                                                                                      | 63168  | 17 | 28 | 8  | 12 |
| Q9D2N4 | Dystrobrevin alpha (Alpha-dystrobrevin) - Mus musculus (Mouse)                                                                                                                             | 84794  | 17 | 0  | 11 | 0  |
| Q6NVF9 | Cleavage and polyadenylation specificity factor 6 - Mus musculus (Mouse)                                                                                                                   | 59287  | 17 | 16 | 7  | 4  |
| Q9JHB4 | WD repeat protein 31 (Spermatid WD repeat protein) (spWD) - Mus musculus (Mouse)                                                                                                           | 41303  | 17 | 0  | 2  | 0  |
| Q8VE09 | TPR repeat-containing protein C18orf17 homolog - Mus musculus (Mouse)                                                                                                                      | 66373  | 17 | 0  | 9  | 0  |
| Q9CXB8 | Alpha-protein kinase 1 (EC 2.7.11.-) (Lymphocyte alpha-protein kinase) - Mus musculus (Mouse)                                                                                              | 137531 | 17 | 0  | 17 | 0  |
| Q99J94 | Solute carrier organic anion transporter family member 1A6 (Solute carrier family 21 member 13) (Kidney-specific organic anion-transporting polypeptide 5) (OATP-5) - Mus musculus (Mouse) | 75806  | 17 | 0  | 7  | 0  |
| Q07563 | Collagen alpha-1(XVII) chain (Bullous pemphigoid antigen 2) (180 kDa bullous pemphigoid antigen 2) - Mus musculus (Mouse)                                                                  | 148402 | 17 | 15 | 11 | 14 |
| Q5YD48 | APOBEC1 complementation factor (APOBEC1-stimulating protein) - Mus musculus (Mouse)                                                                                                        | 65969  | 17 | 0  | 10 | 0  |
| P98078 | Disabled homolog 2 (DOC-2) (Mitogen-responsive phosphoprotein) - Mus musculus (Mouse)                                                                                                      | 82432  | 17 | 0  | 21 | 0  |
| Q9JJT9 | RNA U small nuclear RNA export adapter protein (Phosphorylated adapter RNA export protein) - Mus musculus (Mouse)                                                                          | 43392  | 17 | 0  | 6  | 0  |
| Q8K485 | BTB/POZ domain-containing protein KCTD11 - Mus musculus (Mouse)                                                                                                                            | 26397  | 17 | 19 | 12 | 11 |

|        |                                                                                                                                           |        |    |    |    |    |
|--------|-------------------------------------------------------------------------------------------------------------------------------------------|--------|----|----|----|----|
| Q6PFD7 | Uncharacterized protein C9orf90 homolog - Mus musculus (Mouse)                                                                            | 35358  | 17 | 0  | 5  | 0  |
| Q08091 | Calponin-1 (Calponin H1, smooth muscle) (Basic calponin) - Mus musculus (Mouse)                                                           | 33506  | 16 | 0  | 14 | 0  |
| Q9ER64 | Oxysterol-binding protein-related protein 5 (OSBP-related protein 5) (ORP-5) (Oxysterol-binding protein homolog 1) - Mus musculus (Mouse) | 100057 | 16 | 0  | 12 | 0  |
| Q9CXF4 | TBC1 domain family member 15 - Mus musculus (Mouse)                                                                                       | 77447  | 16 | 0  | 6  | 0  |
| Q8BGP5 | Transmembrane protein 127 - Mus musculus (Mouse)                                                                                          | 26160  | 16 | 0  | 7  | 0  |
| Q68EF6 | Brain-enriched guanylate kinase-associated protein - Mus musculus (Mouse)                                                                 | 65839  | 16 | 0  | 11 | 0  |
| Q8BY16 | Acyltransferase-like 1-A (EC 2.3.1.-) - Mus musculus (Mouse)                                                                              | 60900  | 16 | 18 | 9  | 8  |
| P30678 | Guanine nucleotide-binding protein alpha-15 subunit (G alpha-15) - Mus musculus (Mouse)                                                   | 44021  | 16 | 0  | 6  | 0  |
| Q8BMK0 | Coiled-coil domain-containing protein 21 - Mus musculus (Mouse)                                                                           | 86085  | 16 | 0  | 8  | 0  |
| Q8BW72 | JmjC domain-containing histone demethylation protein 3A (EC 1.14.11.-) (Jumonji domain-containing protein 2A) - Mus musculus (Mouse)      | 122166 | 16 | 16 | 8  | 10 |
| P15089 | Mast cell carboxypeptidase A precursor (EC 3.4.17.1) (MC-CPA) (Carboxypeptidase A3) - Mus musculus (Mouse)                                | 49044  | 16 | 0  | 10 | 0  |
| Q9CPR5 | 39S ribosomal protein L15, mitochondrial precursor (L15mt) (MRP-L15) - Mus musculus (Mouse)                                               | 33692  | 16 | 0  | 8  | 0  |
| Q91X44 | Glucokinase regulatory protein (Glucokinase regulator) - Mus musculus (Mouse)                                                             | 65095  | 16 | 0  | 7  | 0  |
| Q99JW2 | Aminoacylase-1 (EC 3.5.1.14) (N-acyl-L-amino-acid amidohydrolase) (ACY-1) - Mus musculus (Mouse)                                          | 45980  | 16 | 17 | 5  | 8  |

|        |                                                                                                                                                                          |        |    |    |    |    |
|--------|--------------------------------------------------------------------------------------------------------------------------------------------------------------------------|--------|----|----|----|----|
| P41438 | Folate transporter 1 (Solute carrier family 19 member 1) (Intestinal folate carrier protein) (IFC-1) (Reduced folate carrier 1) (RFC1) (RFC-1) - Mus musculus (Mouse)    | 58911  | 16 | 19 | 4  | 3  |
| Q8K298 | Actin-binding protein anillin - Mus musculus (Mouse)                                                                                                                     | 124201 | 16 | 28 | 17 | 23 |
| Q3TCT4 | Ectonucleoside triphosphate diphosphohydrolase 7 (EC 3.6.1.-) (NTPDase 7) (Lysosomal apyrase-like protein 1) - Mus musculus (Mouse)                                      | 69557  | 16 | 33 | 42 | 80 |
| Q6PGF7 | Exocyst complex component 8 (Exocyst complex 84 kDa subunit) - Mus musculus (Mouse)                                                                                      | 81668  | 16 | 0  | 25 | 0  |
| Q80XE1 | Synembryn-B (Protein Ric-8B) - Mus musculus (Mouse)                                                                                                                      | 64110  | 16 | 0  | 14 | 0  |
| Q80Y81 | Zinc phosphodiesterase ELAC protein 2 (EC 3.1.26.11) (Ribonuclease Z 2) (RNase Z 2) (tRNase Z 2) (tRNA 3 endonuclease 2) (ElaC homolog protein 2) - Mus musculus (Mouse) | 93972  | 16 | 0  | 6  | 0  |
| Q64151 | Semaphorin-4C precursor (Semaphorin I) (Sema I) (Semaphorin C-like 1) (M-Sema F) - Mus musculus (Mouse)                                                                  | 93638  | 16 | 0  | 18 | 0  |
| Q9QY53 | Nephrocystin-1 - Mus musculus (Mouse)                                                                                                                                    | 77501  | 16 | 17 | 37 | 35 |
| Q8CJ40 | Rootletin (Ciliary rootlet coiled-coil protein) - Mus musculus (Mouse)                                                                                                   | 227349 | 16 | 21 | 35 | 31 |
| Q61017 | Guanine nucleotide-binding protein G(I)/G(S)/G(O) gamma-T2 subunit precursor (G gamma-C) (G-gamma-8) - Mus musculus (Mouse)                                              | 7854   | 16 | 0  | 3  | 0  |
| Q8VCT3 | Aminopeptidase B (EC 3.4.11.6) (Ap-B) (Arginyl aminopeptidase) (Arginine aminopeptidase) (Cytosol aminopeptidase IV) - Mus musculus (Mouse)                              | 72981  | 16 | 0  | 4  | 0  |
| Q8C784 | Uncharacterized protein C16orf52 homolog - Mus musculus (Mouse)                                                                                                          | 18580  | 16 | 0  | 2  | 0  |
| Q6PAJ1 | Breakpoint cluster region protein (EC 2.7.11.1) - Mus musculus (Mouse)                                                                                                   | 143941 | 16 | 0  | 15 | 0  |

|        |                                                                                                                                                                                                                                                           |        |    |    |    |    |
|--------|-----------------------------------------------------------------------------------------------------------------------------------------------------------------------------------------------------------------------------------------------------------|--------|----|----|----|----|
| Q8BKV1 | Glypican-2 precursor - Mus musculus (Mouse)                                                                                                                                                                                                               | 64160  | 16 | 0  | 5  | 0  |
| Q9Z282 | Probable G-protein coupled receptor 132 (G2 accumulation protein) - Mus musculus (Mouse)                                                                                                                                                                  | 43651  | 16 | 0  | 1  | 0  |
| Q8VDQ8 | NAD-dependent deacetylase sirtuin-2 (EC 3.5.1.-) (SIR2-like protein 2) (mSIR2L2) - Mus musculus (Mouse)                                                                                                                                                   | 43856  | 16 | 0  | 10 | 0  |
| Q8BUL5 | Kelch-like protein 7 - Mus musculus (Mouse)                                                                                                                                                                                                               | 67035  | 16 | 0  | 5  | 0  |
| Q8VCM2 | NADPH oxidase organizer 1 (Nox organizer 1) (Sorting nexin-28) - Mus musculus (Mouse)                                                                                                                                                                     | 39259  | 16 | 0  | 7  | 0  |
| Q08122 | Transducin-like enhancer protein 3 (ESG) (Grg-3) - Mus musculus (Mouse)                                                                                                                                                                                   | 84072  | 16 | 0  | 4  | 0  |
| Q3UA16 | Kinetochores protein Spc25 - Mus musculus (Mouse)                                                                                                                                                                                                         | 26555  | 16 | 81 | 6  | 15 |
| Q60520 | Paired amphipathic helix protein Sin3a (Transcriptional corepressor Sin3a) (Histone deacetylase complex subunit Sin3a) - Mus musculus (Mouse)                                                                                                             | 146889 | 16 | 20 | 14 | 8  |
| P59941 | Mono-ADP-ribosyltransferase sirtuin-6 (EC 2.4.2.31) (SIR2-like protein 6) - Mus musculus (Mouse)                                                                                                                                                          | 37295  | 16 | 0  | 8  | 0  |
| Q80Y75 | DnaJ homolog subfamily B member 13 (Testis spermatocyte apoptosis-related gene 6 protein) (Testis and spermatogenesis cell-related protein 6) (Testis spermatogenesis apoptosis-related gene 6 protein) (Testis spermatogenesis apoptosis-related gene 3) | 36303  | 16 | 15 | 17 | 17 |
| Q8R323 | Replication factor C subunit 3 (Replication factor C 38 kDa subunit) (RFC38) (Activator 1 38 kDa subunit) (A1 38 kDa subunit) (RF-C 38 kDa subunit) - Mus musculus (Mouse)                                                                                | 41241  | 16 | 0  | 28 | 0  |
| Q4KMM3 | Oxidation resistance protein 1 (Protein C7) - Mus musculus (Mouse)                                                                                                                                                                                        | 83364  | 16 | 15 | 9  | 14 |
| Q80UK8 | Integrator complex subunit 2 (Int2) - Mus musculus (Mouse)                                                                                                                                                                                                | 135254 | 16 | 27 | 24 | 24 |

|        |                                                                                                                                                                  |        |    |    |    |    |
|--------|------------------------------------------------------------------------------------------------------------------------------------------------------------------|--------|----|----|----|----|
| P05532 | Mast/stem cell growth factor receptor precursor (EC 2.7.10.1) (SCFR) (Proto-oncogene tyrosine-protein kinase Kit) (c-kit) (CD117 antigen) - Mus musculus (Mouse) | 110186 | 16 | 35 | 12 | 7  |
| Q9ESN6 | Tripartite motif-containing protein 2 (Neural activity-related RING finger protein) - Mus musculus (Mouse)                                                       | 82420  | 16 | 0  | 5  | 0  |
| Q8C0G2 | TRAF3-interacting JNK-activating modulator (TRAF3-interacting protein 3) - Mus musculus (Mouse)                                                                  | 58927  | 16 | 0  | 5  | 0  |
| P42227 | Signal transducer and activator of transcription 3 (Acute-phase response factor) - Mus musculus (Mouse)                                                          | 88796  | 16 | 28 | 33 | 27 |
| Q62376 | U1 small nuclear ribonucleoprotein 70 kDa (U1 SNRNP 70 kDa) (snRNP70) - Mus musculus (Mouse)                                                                     | 52018  | 16 | 16 | 7  | 6  |
| Q4VC17 | ADAMTS-18 precursor (EC 3.4.24.-) (A disintegrin and metalloproteinase with thrombospondin motifs 18) (ADAM-TS 18) (ADAM-TS18) - Mus musculus (Mouse)            | 139589 | 16 | 23 | 8  | 16 |
| O70326 | Gremlin-1 precursor (Cysteine knot superfamily 1, BMP antagonist 1) (Down-regulated in Mos-transformed cells protein) - Mus musculus (Mouse)                     | 21210  | 16 | 0  | 3  | 0  |
| Q8BZ81 | Leucine-rich repeat transmembrane neuronal protein 3 precursor - Mus musculus (Mouse)                                                                            | 66844  | 16 | 15 | 29 | 18 |
| Q8K377 | Leucine-rich repeat transmembrane neuronal protein 1 precursor - Mus musculus (Mouse)                                                                            | 59763  | 16 | 0  | 2  | 0  |
| Q08619 | Interferon-activable protein 205 (IFI-205) (D3 protein) - Mus musculus (Mouse)                                                                                   | 47587  | 16 | 0  | 2  | 0  |
| Q99KD5 | UNC45 homolog A (UNC-45A) (Stromal membrane-associated protein 1) (Smap-1) - Mus musculus (Mouse)                                                                | 104579 | 16 | 0  | 26 | 0  |
| Q9WVE0 | Activation-induced cytidine deaminase (EC 3.5.4.5) (Cytidine aminohydrolase) - Mus musculus (Mouse)                                                              | 24471  | 16 | 15 | 6  | 3  |

|        |                                                                                                                                                                                                                 |        |    |    |    |    |
|--------|-----------------------------------------------------------------------------------------------------------------------------------------------------------------------------------------------------------------|--------|----|----|----|----|
| P97303 | Transcription regulator protein BACH2 (BTB and CNC homolog 2) - Mus musculus (Mouse)                                                                                                                            | 80653  | 16 | 0  | 6  | 0  |
| Q6JPI3 | Thyroid hormone receptor-associated protein 2 (Thyroid hormone receptor-associated protein complex 240 kDa component-like) - Mus musculus (Mouse)                                                               | 244569 | 16 | 15 | 4  | 7  |
| O35607 | Bone morphogenetic protein receptor type-2 precursor (EC 2.7.11.30) (Bone morphogenetic protein receptor type II) (BMP type II receptor) (BMPR-II) (BRK-3) - Mus musculus (Mouse)                               | 116259 | 16 | 0  | 9  | 0  |
| P63005 | Platelet-activating factor acetylhydrolase IB subunit alpha (PAF acetylhydrolase 45 kDa subunit) (PAF-AH 45 kDa subunit) (PAF-AH alpha) (PAFAH alpha) (Lissencephaly-1 protein) (LIS-1) - Mus musculus (Mouse)  | 47210  | 16 | 19 | 9  | 18 |
| Q9CRD2 | Tetratricopeptide repeat protein KIAA0103 - Mus musculus (Mouse)                                                                                                                                                | 35083  | 16 | 0  | 4  | 0  |
| P70275 | Semaphorin-3E precursor (Semaphorin H) (Sema H) - Mus musculus (Mouse)                                                                                                                                          | 90643  | 16 | 0  | 8  | 0  |
| Q5SW75 | Protein phosphatase Slingshot homolog 2 (EC 3.1.3.48) (EC 3.1.3.16) (SSH-2L) (mSSH-2L) - Mus musculus (Mouse)                                                                                                   | 160069 | 16 | 0  | 7  | 0  |
| P59997 | JmjC domain-containing histone demethylation protein 1A (EC 1.14.11.27) ([Histone-H3]-lysine-36 demethylase 1A) (F-box/LRR-repeat protein 11) (F-box and leucine-rich repeat protein 11) - Mus musculus (Mouse) | 134989 | 16 | 0  | 11 | 0  |
| O88910 | MAGUK p55 subfamily member 3 (Protein MPP3) (Dlgh3 protein) - Mus musculus (Mouse)                                                                                                                              | 64774  | 16 | 19 | 13 | 12 |
| Q810U3 | Neurofascin precursor - Mus musculus (Mouse)                                                                                                                                                                    | 138688 | 16 | 0  | 12 | 0  |
| P0C090 | Membrane-associated nucleic acid-binding protein - Mus musculus (Mouse)                                                                                                                                         | 132411 | 16 | 14 | 28 | 18 |

|        |                                                                                                                                                                                                                                                           |        |    |    |    |    |
|--------|-----------------------------------------------------------------------------------------------------------------------------------------------------------------------------------------------------------------------------------------------------------|--------|----|----|----|----|
| Q64323 | N-acetylglucosaminyl-phosphatidylinositol biosynthetic protein (GlcNAc-PI synthesis protein) (Phosphatidylinositol-glycan biosynthesis class A protein) (PIG-A) - Mus musculus (Mouse)                                                                    | 55061  | 16 | 0  | 13 | 0  |
| Q6H1V1 | Bestrophin-3 (Vitelliform macular dystrophy 2-like protein 3) - Mus musculus (Mouse)                                                                                                                                                                      | 76668  | 16 | 0  | 4  | 0  |
| Q60680 | Inhibitor of nuclear factor kappa-B kinase subunit alpha (EC 2.7.11.10) (I kappa-B kinase alpha) (IkbKA) (IKK-alpha) (IKK-A) (IkappaB kinase) (I-kappa-B kinase 1) (IKK1) (Conserved helix-loop-helix ubiquitous kinase) (Nuclear factor NF-kappa-B inhib | 85815  | 16 | 0  | 14 | 0  |
| Q88351 | Inhibitor of nuclear factor kappa-B kinase subunit beta (EC 2.7.11.10) (I-kappa-B-kinase beta) (IkbKB) (IKK-beta) (IKK-B) (I-kappa-B kinase 2) (IKK2) (Nuclear factor NF-kappa-B inhibitor kinase beta) (NFKBIKB) - Mus musculus (Mouse)                  | 87775  | 16 | 0  | 6  | 0  |
| Q9JL25 | Regulator of G-protein signaling 1 (RGS1) - Mus musculus (Mouse)                                                                                                                                                                                          | 22709  | 16 | 0  | 6  | 0  |
| Q9EQW7 | Kinesin-like protein KIF13A - Mus musculus (Mouse)                                                                                                                                                                                                        | 197288 | 16 | 18 | 41 | 46 |
| Q60603 | Potassium voltage-gated channel subfamily H member 1 (Voltage-gated potassium channel subunit Kv10.1) (Ether-a-go-go potassium channel 1) (EAG1) (m-eag) - Mus musculus (Mouse)                                                                           | 112326 | 16 | 19 | 19 | 27 |
| Q920E3 | Potassium voltage-gated channel subfamily H member 5 (Voltage-gated potassium channel subunit Kv10.2) (Ether-a-go-go potassium channel 2) (Eag2) - Mus musculus (Mouse)                                                                                   | 112851 | 16 | 0  | 19 | 0  |

|        |                                                                                                                                                                                                                              |        |    |   |    |   |
|--------|------------------------------------------------------------------------------------------------------------------------------------------------------------------------------------------------------------------------------|--------|----|---|----|---|
| Q54941 | SWI/SNF-related matrix-associated actin-dependent regulator chromatin subfamily E member 1 (BRG1-associated factor 57) - Mus musculus (Mouse)                                                                                | 46667  | 16 | 0 | 8  | 0 |
| Q8VIG0 | Zinc finger CCHC domain-containing protein 14 (BDG-29) - Mus musculus (Mouse)                                                                                                                                                | 100913 | 16 | 0 | 5  | 0 |
| Q8VEM9 | Kelch domain-containing protein 3 (Protein Peas) (Testis intracellular mediator protein) - Mus musculus (Mouse)                                                                                                              | 43795  | 16 | 0 | 28 | 0 |
| Q80U44 | Zinc finger FYVE domain-containing protein 16 (Endofin) (Endosomal-associated FYVE domain protein) - Mus musculus (Mouse)                                                                                                    | 169473 | 16 | 0 | 11 | 0 |
| O70306 | T-box transcription factor TBX15 (T-box protein 15) (MmTBx8) - Mus musculus (Mouse)                                                                                                                                          | 66220  | 16 | 0 | 9  | 0 |
| Q08890 | Iduronate 2-sulfatase precursor (EC 3.1.6.13) (Alpha-L-iduronate sulfate sulfatase) - Mus musculus (Mouse)                                                                                                                   | 62532  | 16 | 0 | 8  | 0 |
| Q91XW8 | FK506-binding protein 6 (EC 5.2.1.8) (Peptidyl-prolyl cis-trans isomerase) (PPIase) (Rotamase) (36 kDa FK506-binding protein) (FKBP-36) (Immunophilin FKBP36) - Mus musculus (Mouse)                                         | 37671  | 16 | 0 | 5  | 0 |
| Q35678 | Monoglyceride lipase (EC 3.1.1.23) (MGL) - Mus musculus (Mouse)                                                                                                                                                              | 33708  | 16 | 0 | 1  | 0 |
| Q8VIJ6 | Splicing factor, proline- and glutamine-rich (Polypyrimidine tract-binding protein-associated-splicing factor) (PTB-associated-splicing factor) (PSF) (DNA-binding p52/p100 complex, 100 kDa subunit) - Mus musculus (Mouse) | 75508  | 16 | 0 | 9  | 0 |
| O55176 | E3 ubiquitin-protein ligase Praja1 (EC 6.3.2.-) - Mus musculus (Mouse)                                                                                                                                                       | 64608  | 16 | 0 | 9  | 0 |



|        |                                                                                                                                                                                              |        |    |    |    |    |
|--------|----------------------------------------------------------------------------------------------------------------------------------------------------------------------------------------------|--------|----|----|----|----|
| Q9R0P9 | Ubiquitin carboxyl-terminal hydrolase isozyme L1 (EC 3.4.19.12) (EC 6.-.-.-) (UCH-L1) (Ubiquitin thioesterase L1) (Neuron cytoplasmic protein 9.5) (PGP 9.5) (PGP9.5) - Mus musculus (Mouse) | 25165  | 16 | 17 | 4  | 3  |
| P52332 | Tyrosine-protein kinase JAK1 (EC 2.7.10.2) (Janus kinase 1) (JAK-1) - Mus musculus (Mouse)                                                                                                   | 135163 | 16 | 0  | 21 | 0  |
| O09100 | Endothelial transcription factor GATA-2 (GATA-binding protein 2) - Mus musculus (Mouse)                                                                                                      | 51177  | 16 | 18 | 13 | 14 |
| Q6GQT1 | Alpha-2-macroglobulin-P precursor (Alpha-2-macroglobulin) - Mus musculus (Mouse)                                                                                                             | 165648 | 16 | 0  | 13 | 0  |
| Q641K5 | NUAK family SNF1-like kinase 1 (EC 2.7.11.1) - Mus musculus (Mouse)                                                                                                                          | 74129  | 16 | 0  | 7  | 0  |
| Q8K561 | Otoancorin precursor - Mus musculus (Mouse)                                                                                                                                                  | 127547 | 16 | 0  | 11 | 0  |
| Q9D1P0 | 39S ribosomal protein L13, mitochondrial (L13mt) (MRP-L13) - Mus musculus (Mouse)                                                                                                            | 20721  | 16 | 0  | 5  | 0  |
| Q80VW5 | Whirlin - Mus musculus (Mouse)                                                                                                                                                               | 96641  | 16 | 0  | 16 | 0  |
| Q99PV5 | Class B basic helix-loop-helix protein 3 (bHLHB3) (Differentially expressed in chondrocytes protein 2) (mDEC2) - Mus musculus (Mouse)                                                        | 44375  | 16 | 20 | 9  | 21 |
| O35185 | Class B basic helix-loop-helix protein 2 (bHLHB2) (E47 interaction protein 1) (eipl) (Stimulated by retinoic acid gene 13 protein) - Mus musculus (Mouse)                                    | 45732  | 16 | 0  | 12 | 0  |
| Q9WV34 | MAGUK p55 subfamily member 2 (Protein MPP2) (Dlgh2 protein) - Mus musculus (Mouse)                                                                                                           | 61802  | 16 | 0  | 49 | 0  |
| Q9CZJ2 | Heat shock 70 kDa protein 12B - Mus musculus (Mouse)                                                                                                                                         | 76812  | 16 | 0  | 19 | 0  |
| Q9ESZ8 | General transcription factor II-I (GTFII-I) (TFII-I) (Bruton tyrosine kinase-associated protein 135) (BTK-associated protein 135) (BAP-135) - Mus musculus (Mouse)                           | 112708 | 16 | 16 | 22 | 21 |

|        |                                                                                                                                                                                                                                           |        |    |    |    |   |
|--------|-------------------------------------------------------------------------------------------------------------------------------------------------------------------------------------------------------------------------------------------|--------|----|----|----|---|
| Q5SUF2 | Cisplatin resistance-associated overexpressed protein - Mus musculus (Mouse)                                                                                                                                                              | 51818  | 16 | 0  | 7  | 0 |
| P55012 | Solute carrier family 12 member 2 (Bumetanide-sensitive sodium-(potassium)-chloride cotransporter 1) (Basolateral Na-K-Cl symporter) - Mus musculus (Mouse)                                                                               | 131666 | 16 | 0  | 36 | 0 |
| Q8R1B5 | Complexin-3 (Complexin III) (CPX III) - Mus musculus (Mouse)                                                                                                                                                                              | 17632  | 16 | 29 | 2  | 4 |
| Q9R0Z9 | Rho GTPase-activating protein 7 (Rho-type GTPase-activating protein 7) (Deleted in liver cancer 1 protein homolog) (Dlc-1) (StAR-related lipid transfer protein 12) (StARD12) (START domain-containing protein 12) - Mus musculus (Mouse) | 124487 | 16 | 0  | 18 | 0 |
| Q64285 | Bile salt-activated lipase precursor (EC 3.1.1.3) (EC 3.1.1.13) (BAL) (Bile salt-stimulated lipase) (BSSL) (Carboxyl ester lipase) (Sterol esterase) (Cholesterol esterase) (Pancreatic lysophospholipase) - Mus musculus (Mouse)         | 66170  | 16 | 0  | 10 | 0 |
| O88509 | DNA (cytosine-5)-methyltransferase 3B (EC 2.1.1.37) (Dnmt3b) (DNA methyltransferase MmullIB) (DNA MTase MmullIB) (M.MmullIB) - Mus musculus (Mouse)                                                                                       | 98592  | 16 | 0  | 23 | 0 |
| Q8VE73 | Cullin-7 (CUL-7) (p185) (p193) - Mus musculus (Mouse)                                                                                                                                                                                     | 193824 | 16 | 0  | 14 | 0 |
| Q8BYJ6 | TBC1 domain family member 4 (Akt substrate of 160 kDa) (AS160) - Mus musculus (Mouse)                                                                                                                                                     | 148954 | 16 | 0  | 20 | 0 |
| P11087 | Collagen alpha-1(I) chain precursor - Mus musculus (Mouse)                                                                                                                                                                                | 138974 | 16 | 0  | 17 | 0 |
| P41778 | Pre-B-cell leukemia transcription factor 1 (Homeobox protein PBX1) - Mus musculus (Mouse)                                                                                                                                                 | 46882  | 16 | 0  | 7  | 0 |

|        |                                                                                                                                                                                                                                              |        |    |    |    |    |
|--------|----------------------------------------------------------------------------------------------------------------------------------------------------------------------------------------------------------------------------------------------|--------|----|----|----|----|
| Q9Z315 | U4/U6.U5 tri-snRNP-associated protein 1 (Squamous cell carcinoma antigen recognized by T-cells 1) (SART-1) (mSART-1) (Hypoxia-associated factor) - Mus musculus (Mouse)                                                                      | 91001  | 16 | 0  | 20 | 0  |
| Q9EPR5 | VPS10 domain-containing receptor SorCS2 precursor - Mus musculus (Mouse)                                                                                                                                                                     | 129875 | 16 | 0  | 10 | 0  |
| Q61292 | Laminin subunit beta-2 precursor (S-laminin) (S-LAM) - Mus musculus (Mouse)                                                                                                                                                                  | 203353 | 16 | 0  | 20 | 0  |
| Q8BMB0 | Protein EMSY - Mus musculus (Mouse)                                                                                                                                                                                                          | 135550 | 16 | 0  | 15 | 0  |
| Q91W40 | Kinesin light chain 3 - Mus musculus (Mouse)                                                                                                                                                                                                 | 56200  | 16 | 0  | 23 | 0  |
| Q921M3 | Splicing factor 3B subunit 3 (Spliceosome-associated protein 130) (SAP 130) (SF3b130) (Pre-mRNA-splicing factor SF3b 130 kDa subunit) - Mus musculus (Mouse)                                                                                 | 136548 | 16 | 34 | 24 | 27 |
| Q8BLN6 | Uncharacterized protein C2orf21 homolog - Mus musculus (Mouse)                                                                                                                                                                               | 44877  | 16 | 0  | 4  | 0  |
| Q91WR3 | Activating signal cointegrator 1 complex subunit 2 (ASC-1 complex subunit p100) (Trip4 complex subunit p100) - Mus musculus (Mouse)                                                                                                          | 86226  | 16 | 0  | 7  | 0  |
| Q80WG5 | Leucine-rich repeat-containing protein 8A - Mus musculus (Mouse)                                                                                                                                                                             | 94972  | 16 | 0  | 8  | 0  |
| Q8BGR9 | Ubiquitin-like domain-containing CTD phosphatase 1 (EC 3.1.3.16) - Mus musculus (Mouse)                                                                                                                                                      | 36927  | 16 | 0  | 9  | 0  |
| Q8BKZ9 | Pyruvate dehydrogenase protein X component, mitochondrial precursor (Dihydrolipoamide dehydrogenase-binding protein of pyruvate dehydrogenase complex) (Lipoyl-containing pyruvate dehydrogenase complex component X) - Mus musculus (Mouse) | 54250  | 16 | 0  | 4  | 0  |
| Q8C159 | Tetratricopeptide repeat protein 22 (TPR repeat protein 22) - Mus musculus (Mouse)                                                                                                                                                           | 63688  | 16 | 0  | 8  | 0  |
| Q91WM1 | Spermatid perinuclear RNA-binding protein - Mus musculus (Mouse)                                                                                                                                                                             | 74342  | 16 | 15 | 14 | 14 |

|        |                                                                                                                                                                                                              |        |    |    |    |   |
|--------|--------------------------------------------------------------------------------------------------------------------------------------------------------------------------------------------------------------|--------|----|----|----|---|
| Q6P9N1 | Protein FAM126A (Down-regulated by CTNNB1 protein A) - Mus musculus (Mouse)                                                                                                                                  | 58069  | 16 | 0  | 5  | 0 |
| Q64127 | Transcription intermediary factor 1-alpha (TIF1-alpha) (Tripartite motif-containing protein 24) - Mus musculus (Mouse)                                                                                       | 118636 | 16 | 0  | 26 | 0 |
| P58468 | Uncharacterized protein C21orf70 homolog - Mus musculus (Mouse)                                                                                                                                              | 24799  | 16 | 0  | 12 | 0 |
| Q9EPT5 | Solute carrier organic anion transporter family member 2A1 (Solute carrier family 21 member 2) (Prostaglandin transporter) (PGT) - Mus musculus (Mouse)                                                      | 71356  | 16 | 0  | 5  | 0 |
| Q8BUM3 | Tyrosine-protein phosphatase non-receptor type 7 (EC 3.1.3.48) - Mus musculus (Mouse)                                                                                                                        | 40839  | 16 | 15 | 6  | 3 |
| Q8VHQ9 | Acyl-coenzyme A thioesterase 11 (EC 3.1.2.-) (Acyl-CoA thioesterase 11) (Acyl-CoA thioester hydrolase 11) (Brown fat-inducible thioesterase) (BFIT) (Adipose-associated thioesterase) - Mus musculus (Mouse) | 68167  | 16 | 0  | 7  | 0 |
| Q9CWT6 | Probable ATP-dependent RNA helicase DDX28 (EC 3.6.1.-) (Mitochondrial DEAD box protein 28) - Mus musculus (Mouse)                                                                                            | 59734  | 16 | 0  | 13 | 0 |
| Q3UZ39 | Leucine-rich repeat flightless-interacting protein 1 (LRR FLII-interacting protein 1) (FLI-LRR-associated protein 1) (Flap-1) (H186 FLAP) - Mus musculus (Mouse)                                             | 79885  | 16 | 0  | 14 | 0 |
| Q91WK0 | Leucine-rich repeat flightless-interacting protein 2 (LRR FLII-interacting protein 2) - Mus musculus (Mouse)                                                                                                 | 47233  | 16 | 0  | 3  | 0 |
| P97793 | ALK tyrosine kinase receptor precursor (EC 2.7.10.1) (Anaplastic lymphoma kinase) (CD246 antigen) - Mus musculus (Mouse)                                                                                     | 176975 | 16 | 0  | 11 | 0 |
| Q5RJI4 | Protein kinase-like protein SgK493 (Sugen kinase 493) - Mus musculus (Mouse)                                                                                                                                 | 33619  | 16 | 0  | 2  | 0 |

|        |                                                                                                                                                                                                                                 |        |    |    |    |    |
|--------|---------------------------------------------------------------------------------------------------------------------------------------------------------------------------------------------------------------------------------|--------|----|----|----|----|
| Q9Z1Q2 | Protein BAT5 (HLA-B-associated transcript 5) - Mus musculus (Mouse)                                                                                                                                                             | 63673  | 16 | 14 | 19 | 14 |
| Q8R307 | Vacuolar protein sorting-associated protein 18 - Mus musculus (Mouse)                                                                                                                                                           | 111574 | 16 | 0  | 20 | 0  |
| Q8BZ21 | Histone acetyltransferase MYST3 (EC 2.3.1.48) (EC 2.3.1.-) (MYST protein 3) (MOZ, YBF2/SAS3, SAS2 and TIP60 protein 3) (Monocytic leukemia zinc finger protein) (Monocytic leukemia zinc finger homolog) - Mus musculus (Mouse) | 227741 | 16 | 19 | 17 | 17 |
| Q9WVL4 | Rhodopsin kinase precursor (EC 2.7.11.14) (RK) (G protein-coupled receptor kinase 1) - Mus musculus (Mouse)                                                                                                                     | 64366  | 16 | 22 | 5  | 6  |
| P17809 | Solute carrier family 2, facilitated glucose transporter member 1 (Glucose transporter type 1, erythrocyte/brain) (GT1) - Mus musculus (Mouse)                                                                                  | 54242  | 15 | 20 | 7  | 7  |
| P70207 | Plexin-A2 precursor (Plexin-2) (Plex 2) - Mus musculus (Mouse)                                                                                                                                                                  | 213299 | 15 | 0  | 15 | 0  |
| Q3V016 | Homeodomain-interacting protein kinase 4 (EC 2.7.11.1) - Mus musculus (Mouse)                                                                                                                                                   | 69748  | 15 | 0  | 4  | 0  |
| P47791 | Glutathione reductase, mitochondrial precursor (EC 1.8.1.7) (GR) (GRase) - Mus musculus (Mouse)                                                                                                                                 | 54256  | 15 | 0  | 8  | 0  |
| P70218 | Mitogen-activated protein kinase kinase kinase 1 (EC 2.7.11.1) (MAPK/ERK kinase kinase 1) (MEK kinase kinase 1) (MEKKK 1) (Hematopoietic progenitor kinase) (HPK) - Mus musculus (Mouse)                                        | 92674  | 15 | 0  | 11 | 0  |
| P00186 | Cytochrome P450 1A2 (EC 1.14.14.1) (CYPIA2) (P450-P2/P450-P3) - Mus musculus (Mouse)                                                                                                                                            | 58489  | 15 | 0  | 27 | 0  |
| Q07456 | AMBIP protein precursor [Contains: Alpha-1-microglobulin; Inter-alpha-trypsin inhibitor light chain (ITI-LC) (Bikunin) (HI-30)] - Mus musculus (Mouse)                                                                          | 39957  | 15 | 0  | 6  | 0  |

|        |                                                                                                                                                                                                                      |        |    |    |    |    |
|--------|----------------------------------------------------------------------------------------------------------------------------------------------------------------------------------------------------------------------|--------|----|----|----|----|
| Q61194 | Phosphatidylinositol-4-phosphate 3-kinase C2 domain-containing alpha polypeptide (EC 2.7.1.154) (Phosphoinositide 3-Kinase-C2-alpha) (PtdIns-3-kinase C2 alpha) (PI3K-C2alpha) (Cpk-m) (p170) - Mus musculus (Mouse) | 192462 | 15 | 20 | 35 | 28 |
| P50284 | Tumor necrosis factor receptor superfamily member 3 precursor (Lymphotoxin-beta receptor) - Mus musculus (Mouse)                                                                                                     | 46466  | 15 | 0  | 12 | 0  |
| P70451 | Proto-oncogene tyrosine-protein kinase FER (EC 2.7.10.2) (p94-FER) (c-FER) - Mus musculus (Mouse)                                                                                                                    | 95203  | 15 | 19 | 20 | 23 |
| Q3U034 | Methyltransferase-like protein 4 (EC 2.1.1.-) - Mus musculus (Mouse)                                                                                                                                                 | 54184  | 15 | 0  | 15 | 0  |
| P63038 | 60 kDa heat shock protein, mitochondrial precursor (Hsp60) (60 kDa chaperonin) (CPN60) (Heat shock protein 60) (HSP-60) (Mitochondrial matrix protein P1) (HSP-65) - Mus musculus (Mouse)                            | 61088  | 15 | 32 | 22 | 13 |
| Q99NE9 | Pre-B-cell leukemia transcription factor 4 (Homeobox protein PBX4) - Mus musculus (Mouse)                                                                                                                            | 42448  | 15 | 0  | 19 | 0  |
| Q8K4R9 | Discs large homolog 7 (Hepatoma up-regulated protein homolog) (HURP) - Mus musculus (Mouse)                                                                                                                          | 90882  | 15 | 20 | 8  | 6  |
| O88622 | Poly(ADP-ribose) glycohydrolase (EC 3.2.1.143) - Mus musculus (Mouse)                                                                                                                                                | 110623 | 15 | 0  | 11 | 0  |
| Q9Z1M0 | P2X purinoceptor 7 (ATP receptor) (P2X7) (Purinergic receptor) (P2Z receptor) - Mus musculus (Mouse)                                                                                                                 | 69974  | 15 | 0  | 7  | 0  |
| P43346 | Deoxycytidine kinase (EC 2.7.1.74) (dCK) - Mus musculus (Mouse)                                                                                                                                                      | 30633  | 15 | 0  | 8  | 0  |
| Q08761 | Vitamin K-dependent protein S precursor - Mus musculus (Mouse)                                                                                                                                                       | 76939  | 15 | 0  | 10 | 0  |
| Q9WTP5 | Cadherin-22 precursor (Pituitary and brain cadherin) (PB-cadherin) - Mus musculus (Mouse)                                                                                                                            | 88253  | 15 | 20 | 15 | 20 |

|        |                                                                                                                                                                                                                                                          |        |    |    |    |    |
|--------|----------------------------------------------------------------------------------------------------------------------------------------------------------------------------------------------------------------------------------------------------------|--------|----|----|----|----|
| Q8K2H6 | Anaphase-promoting complex subunit 10 (APC10) (Cyclosome subunit 10) - Mus musculus (Mouse)                                                                                                                                                              | 21424  | 15 | 0  | 5  | 0  |
| Q9D8X1 | Copper homeostasis protein cutC homolog - Mus musculus (Mouse)                                                                                                                                                                                           | 29384  | 15 | 0  | 6  | 0  |
| Q9JJV4 | Voltage-dependent calcium channel gamma-4 subunit (Neuronal voltage-gated calcium channel gamma-4 subunit) - Mus musculus (Mouse)                                                                                                                        | 36854  | 15 | 0  | 13 | 0  |
| Q9EPC2 | Fibroblast growth factor 23 precursor (FGF-23) - Mus musculus (Mouse)                                                                                                                                                                                    | 28139  | 15 | 0  | 2  | 0  |
| Q91ZI0 | Cadherin EGF LAG seven-pass G-type receptor 3 precursor - Mus musculus (Mouse)                                                                                                                                                                           | 363027 | 15 | 0  | 21 | 0  |
| Q9WUV0 | Origin recognition complex subunit 5 - Mus musculus (Mouse)                                                                                                                                                                                              | 50698  | 15 | 0  | 5  | 0  |
| Q8CIM8 | Integrator complex subunit 4 (Int4) - Mus musculus (Mouse)                                                                                                                                                                                               | 109093 | 15 | 0  | 17 | 0  |
| P14404 | Ecotropic virus integration site 1 protein (EVI-1) - Mus musculus (Mouse)                                                                                                                                                                                | 118370 | 15 | 0  | 13 | 0  |
| Q9CQE1 | Protein NipSnap3A (NipSnap-related protein) - Mus musculus (Mouse)                                                                                                                                                                                       | 28405  | 15 | 25 | 16 | 29 |
| Q9R060 | Nucleotide-binding protein 1 (NBP 1) - Mus musculus (Mouse)                                                                                                                                                                                              | 34690  | 15 | 0  | 1  | 0  |
| Q91VY6 | Pleckstrin homology Sec7 and coiled-coil domains-binding protein (Cytohesin-binding protein HE) (Cbp) - Mus musculus (Mouse)                                                                                                                             | 40517  | 15 | 0  | 64 | 0  |
| Q3V1T4 | Prolyl 3-hydroxylase 1 precursor (EC 1.14.11.7) (Leucine- and proline-enriched proteoglycan 1) (Leprecan-1) (Growth suppressor 1) - Mus musculus (Mouse)                                                                                                 | 84454  | 15 | 21 | 6  | 6  |
| Q61093 | Cytochrome b-245 heavy chain (p22 phagocyte B-cytochrome) (Neutrophil cytochrome b 91 kDa polypeptide) (CGD91-phox) (gp91-phox) (gp91-1) (Heme-binding membrane glycoprotein gp91phox) (Cytochrome b(558) subunit beta) (Cytochrome b558 subunit beta) - | 66175  | 15 | 0  | 5  | 0  |

|        |                                                                                                                                                                                                                                                                                      |        |    |    |    |    |
|--------|--------------------------------------------------------------------------------------------------------------------------------------------------------------------------------------------------------------------------------------------------------------------------------------|--------|----|----|----|----|
| Q8JZQ2 | AFG3-like protein 2 (EC 3.4.24.-)<br>)- Mus musculus (Mouse)                                                                                                                                                                                                                         | 89976  | 15 | 27 | 17 | 13 |
| Q6P4S6 | Serine/threonine-protein kinase<br>QSK (EC 2.7.11.1) - Mus<br>musculus (Mouse)                                                                                                                                                                                                       | 146946 | 15 | 14 | 10 | 10 |
| Q9D1L0 | Coiled-coil-helix-coiled-coil-helix<br>domain-containing protein 2 -<br>Mus musculus (Mouse)                                                                                                                                                                                         | 15879  | 15 | 0  | 3  | 0  |
| Q924C6 | Lysyl oxidase homolog 4<br>precursor (EC 1.4.3.-) (Lysyl<br>oxidase-like protein 4) (Lysyl<br>oxidase-related protein C) - Mus<br>musculus (Mouse)                                                                                                                                   | 86647  | 15 | 28 | 5  | 4  |
| Q6PDN3 | Myosin light chain kinase,<br>smooth muscle (EC 2.7.11.18)<br>(MLCK) (Telokin) (Kinase-<br>related protein) (KRP) - Mus<br>musculus (Mouse)                                                                                                                                          | 215415 | 15 | 0  | 23 | 0  |
| Q8BW70 | Ubiquitin carboxyl-terminal<br>hydrolase 38 (EC 3.1.2.15)<br>(Ubiquitin thioesterase 38)<br>(Ubiquitin-specific-processing<br>protease 38) (Deubiquitinating<br>enzyme 38) - Mus musculus<br>(Mouse)                                                                                 | 117624 | 15 | 0  | 4  | 0  |
| Q9CYN2 | Signal peptidase complex<br>subunit 2 (EC 3.4.-.-)<br>(Microsomal signal peptidase 25<br>kDa subunit) (SPase 25 kDa<br>subunit) - Mus musculus<br>(Mouse)                                                                                                                            | 25190  | 15 | 0  | 3  | 0  |
| P70211 | Netrin receptor DCC precursor<br>(Tumor suppressor protein DCC)<br>- Mus musculus (Mouse)                                                                                                                                                                                            | 159113 | 15 | 0  | 14 | 0  |
| P97467 | Peptidyl-glycine alpha-amidating<br>monooxygenase precursor<br>(PAM) [Includes: Peptidylglycine<br>alpha-hydroxylating<br>monooxygenase (EC 1.14.17.3)<br>(PHM); Peptidyl-alpha-<br>hydroxyglycine alpha-amidating<br>lyase (EC 4.3.2.5)<br>(Peptidylamidoglycolate lyase)<br>(PAL)] | 109834 | 15 | 17 | 5  | 5  |
| Q9Z2V5 | Histone deacetylase 6 (HD6)<br>(Histone deacetylase mHDA2) -<br>Mus musculus (Mouse)                                                                                                                                                                                                 | 127505 | 15 | 0  | 5  | 0  |
| Q684R7 | FRAS1-related extracellular<br>matrix protein 1 precursor<br>(Protein QBRICK) - Mus<br>musculus (Mouse)                                                                                                                                                                              | 246272 | 15 | 0  | 15 | 0  |



|        |                                                                                                                                                             |        |    |    |    |    |
|--------|-------------------------------------------------------------------------------------------------------------------------------------------------------------|--------|----|----|----|----|
| Q88854 | Galanin receptor type 2 (GAL2-R) (GALR2) - Mus musculus (Mouse)                                                                                             | 41306  | 15 | 0  | 10 | 0  |
| P80314 | T-complex protein 1 subunit beta (TCP-1-beta) (CCT-beta) - Mus musculus (Mouse)                                                                             | 57783  | 15 | 0  | 39 | 0  |
| Q3TRR0 | Microtubule-associated protein 9 (Aster-associated protein) - Mus musculus (Mouse)                                                                          | 73580  | 15 | 0  | 14 | 0  |
| P39087 | Glutamate receptor, ionotropic kainate 2 precursor (Glutamate receptor 6) (GluR-6) (GluR6) (Glutamate receptor beta-2) (GluR beta-2) - Mus musculus (Mouse) | 103105 | 15 | 0  | 14 | 0  |
| Q03141 | MAP/microtubule affinity-regulating kinase 3 (EC 2.7.11.1) (MPK-10) (ELKL motif kinase 2) - Mus musculus (Mouse)                                            | 84907  | 15 | 0  | 17 | 0  |
| Q92019 | WD repeat protein 7 (TGF-beta resistance-associated protein TRAG) - Mus musculus (Mouse)                                                                    | 165752 | 15 | 0  | 29 | 0  |
| P08003 | Protein disulfide-isomerase A4 precursor (EC 5.3.4.1) (Protein ERp-72) (ERp72) - Mus musculus (Mouse)                                                       | 72271  | 15 | 0  | 16 | 0  |
| Q8CIA5 | UDP-xylose and UDP-N-acetylglucosamine transporter (Solute carrier family 35 member B4) - Mus musculus (Mouse)                                              | 37834  | 15 | 0  | 4  | 0  |
| Q7TSG3 | F-box only protein 5 (Early mitotic inhibitor 1) - Mus musculus (Mouse)                                                                                     | 48619  | 15 | 27 | 5  | 9  |
| Q9Z207 | Protein diaphanous homolog 3 (Diaphanous-related formin-3) (DRF3) (mDIA2) (p134mDIA2) - Mus musculus (Mouse)                                                | 134684 | 15 | 0  | 21 | 0  |
| Q6PB70 | Transmembrane protein 16H - Mus musculus (Mouse)                                                                                                            | 120109 | 15 | 15 | 20 | 32 |
| Q8BI67 | Zinc finger protein 473 homolog (Zinc finger protein 100) (Zfp-100) - Mus musculus (Mouse)                                                                  | 104755 | 15 | 0  | 2  | 0  |
| Q9Z0J4 | Nitric-oxide synthase, brain (EC 1.14.13.39) (NOS type I) (Neuronal NOS) (N-NOS) (nNOS) (Constitutive NOS) (NC-NOS) (bNOS) - Mus musculus (Mouse)           | 161740 | 15 | 0  | 22 | 0  |
| Q8C3F2 | UPF0318 protein FAM120C - Mus musculus (Mouse)                                                                                                              | 120924 | 15 | 19 | 10 | 8  |

|        |                                                                                                                                                                                                                       |        |    |    |     |    |
|--------|-----------------------------------------------------------------------------------------------------------------------------------------------------------------------------------------------------------------------|--------|----|----|-----|----|
| P11588 | Major urinary protein 1 precursor (MUP 1) - Mus musculus (Mouse)                                                                                                                                                      | 20920  | 15 | 0  | 4   | 0  |
| P56695 | Wolframin - Mus musculus (Mouse)                                                                                                                                                                                      | 101597 | 15 | 0  | 102 | 0  |
| Q52KR2 | Leucine-rich repeats and immunoglobulin-like domains protein 2 precursor - Mus musculus (Mouse)                                                                                                                       | 119214 | 15 | 0  | 9   | 0  |
| Q08509 | Epidermal growth factor receptor kinase substrate 8 - Mus musculus (Mouse)                                                                                                                                            | 92023  | 15 | 0  | 5   | 0  |
| Q6P560 | Zinc finger protein 182 (Zinc finger protein 21) - Mus musculus (Mouse)                                                                                                                                               | 74217  | 15 | 14 | 41  | 16 |
| Q99MR9 | Protein phosphatase 1 regulatory subunit 3A (Protein phosphatase 1 glycogen-associated regulatory subunit) (Protein phosphatase type-1 glycogen targeting subunit) (RGL) - Mus musculus (Mouse)                       | 122473 | 15 | 0  | 10  | 0  |
| Q9WUD1 | STIP1 homology and U box-containing protein 1 (EC 6.3.2.-) (STIP1 homology and U-box-containing protein 1) (Carboxy terminus of Hsp70-interacting protein) (E3 ubiquitin protein ligase CHIP) - Mus musculus (Mouse)  | 35343  | 15 | 0  | 5   | 0  |
| Q922H1 | Protein arginine N-methyltransferase 3 (EC 2.1.1.-) (Heterogeneous nuclear ribonucleoprotein methyltransferase-like protein 3) - Mus musculus (Mouse)                                                                 | 60548  | 15 | 0  | 9   | 0  |
| Q8BHB9 | Chloride intracellular channel 6 - Mus musculus (Mouse)                                                                                                                                                               | 63133  | 15 | 0  | 2   | 0  |
| Q08943 | FACT complex subunit SSRP1 (Facilitates chromatin transcription complex subunit SSRP1) (Structure-specific recognition protein 1) (Recombination signal sequence recognition protein 1) (T160) - Mus musculus (Mouse) | 81152  | 15 | 23 | 9   | 18 |
| Q61595 | Kinectin - Mus musculus (Mouse)                                                                                                                                                                                       | 153068 | 15 | 50 | 43  | 56 |

|        |                                                                                                                                                                                                                                                       |        |    |    |    |    |
|--------|-------------------------------------------------------------------------------------------------------------------------------------------------------------------------------------------------------------------------------------------------------|--------|----|----|----|----|
| Q35674 | ADAM 19 precursor (EC 3.4.24.-)<br>(A disintegrin and metalloproteinase domain 19)<br>(Meltrin beta) - Mus musculus<br>(Mouse)                                                                                                                        | 103703 | 15 | 15 | 11 | 9  |
| P42581 | Homeobox protein HMX3<br>(Homeobox protein Nkx-5.1) -<br>Mus musculus (Mouse)                                                                                                                                                                         | 49411  | 15 | 15 | 4  | 5  |
| Q9JJS6 | Beta,beta-carotene 15,15~-<br>monooxygenase (EC<br>1.14.99.36) (Beta-carotene<br>dioxygenase 1) - Mus musculus<br>(Mouse)                                                                                                                             | 64280  | 15 | 0  | 4  | 0  |
| P97355 | Spermine synthase (EC<br>2.5.1.22) (Spermidine<br>aminopropyltransferase)<br>(SPMSY) - Mus musculus<br>(Mouse)                                                                                                                                        | 41743  | 15 | 0  | 7  | 0  |
| Q8BUR4 | Dedicator of cytokinesis protein<br>1 (180 kDa protein downstream<br>of CRK) (DOCK180) - Mus<br>musculus (Mouse)                                                                                                                                      | 215918 | 15 | 0  | 38 | 0  |
| Q7TNE1 | Uncharacterized protein C7orf10<br>homolog - Mus musculus<br>(Mouse)                                                                                                                                                                                  | 48100  | 15 | 0  | 11 | 0  |
| P81067 | Iroquois-class homeodomain<br>protein IRX-3 (Iroquois<br>homeobox protein 3)<br>(Homeodomain protein IRXB1) -<br>Mus musculus (Mouse)                                                                                                                 | 52833  | 15 | 0  | 4  | 0  |
| Q6ZQ12 | Ninein-like protein - Mus<br>musculus (Mouse)                                                                                                                                                                                                         | 145740 | 15 | 34 | 23 | 16 |
| Q922J3 | Restin - Mus musculus (Mouse)                                                                                                                                                                                                                         | 156345 | 15 | 16 | 37 | 46 |
| P35374 | Type-2 angiotensin II receptor<br>(AT2) - Mus musculus (Mouse)                                                                                                                                                                                        | 42145  | 15 | 0  | 7  | 0  |
| Q9D4H2 | GRIP and coiled-coil domain-<br>containing protein 1 (Golgi<br>coiled coil protein 1) - Mus<br>musculus (Mouse)                                                                                                                                       | 87795  | 15 | 16 | 26 | 24 |
| Q5ND34 | WD repeat protein 81 - Mus<br>musculus (Mouse)                                                                                                                                                                                                        | 96671  | 15 | 20 | 14 | 7  |
| Q88974 | Histone-lysine N-<br>methyltransferase, H3 lysine-9<br>specific 4 (EC 2.1.1.43) (Histone<br>H3-K9 methyltransferase 4) (H3-<br>K9-HMTase 4) (SET domain<br>bifurcated 1) (ERG-associated<br>protein with SET domain)<br>(ESET) - Mus musculus (Mouse) | 146453 | 15 | 0  | 14 | 0  |

|        |                                                                                                                                                                   |        |    |    |    |    |
|--------|-------------------------------------------------------------------------------------------------------------------------------------------------------------------|--------|----|----|----|----|
| Q8C2E4 | Pentatricopeptide repeat protein 1 - Mus musculus (Mouse)                                                                                                         | 78338  | 15 | 0  | 10 | 0  |
| Q91VN6 | Probable ATP-dependent RNA helicase DDX41 (EC 3.6.1.-) (DEAD box protein 41) - Mus musculus (Mouse)                                                               | 70417  | 15 | 0  | 8  | 0  |
| P52963 | Band 4.1-like protein 4A (Protein NBL4) - Mus musculus (Mouse)                                                                                                    | 64726  | 15 | 0  | 6  | 0  |
| Q9CQP0 | Mitochondrial 39S ribosomal protein L33 (L33mt) (MRP-L33) - Mus musculus (Mouse)                                                                                  | 7411   | 15 | 0  | 2  | 0  |
| Q9D1H7 | UPF0363 protein C7orf20 homolog - Mus musculus (Mouse)                                                                                                            | 36730  | 15 | 0  | 7  | 0  |
| Q2EMV9 | Poly [ADP-ribose] polymerase 14 (EC 2.4.2.30) (PARP-14) (Collaborator of STAT6) (CoaSt6) - Mus musculus (Mouse)                                                   | 205661 | 15 | 28 | 63 | 77 |
| Q61079 | Single-minded homolog 2 (SIM transcription factor) (mSIM) - Mus musculus (Mouse)                                                                                  | 73265  | 15 | 0  | 6  | 0  |
| Q61045 | Single-minded homolog 1 (mSIM1) - Mus musculus (Mouse)                                                                                                            | 86399  | 15 | 0  | 4  | 0  |
| Q8CHG3 | GRIP and coiled-coil domain-containing protein 2 (Golgi coiled coil protein GCC185) - Mus musculus (Mouse)                                                        | 195294 | 15 | 19 | 32 | 26 |
| P68500 | Contactin-5 precursor (Neural recognition molecule NB-2) - Mus musculus (Mouse)                                                                                   | 121544 | 15 | 0  | 17 | 0  |
| Q02357 | Ankyrin-1 (Erythrocyte ankyrin) - Mus musculus (Mouse)                                                                                                            | 205355 | 15 | 18 | 22 | 11 |
| Q9CZS1 | Aldehyde dehydrogenase X, mitochondrial precursor (EC 1.2.1.3) (Aldehyde dehydrogenase family 1 member B1) - Mus musculus (Mouse)                                 | 58087  | 15 | 18 | 9  | 6  |
| P17439 | Glucosylceramidase precursor (EC 3.2.1.45) (Beta-glucocerebrosidase) (Acid beta-glucosidase) (D-glucosyl-N-acylsphingosine glucohydrolase) - Mus musculus (Mouse) | 57984  | 15 | 18 | 5  | 9  |

|        |                                                                                                                                                                                  |        |    |    |    |    |
|--------|----------------------------------------------------------------------------------------------------------------------------------------------------------------------------------|--------|----|----|----|----|
| Q9Z2B5 | Eukaryotic translation initiation factor 2-alpha kinase 3 precursor (EC 2.7.11.1) (PRKR-like endoplasmic reticulum kinase) (Pancreatic eIF2-alpha kinase) - Mus musculus (Mouse) | 125744 | 15 | 0  | 7  | 0  |
| Q99PN3 | Tripartite motif-containing protein 26 (Zinc finger protein 173) - Mus musculus (Mouse)                                                                                          | 63679  | 15 | 18 | 7  | 10 |
| Q8R089 | Probable fibrosin-1 long transcript protein - Mus musculus (Mouse)                                                                                                               | 39546  | 15 | 0  | 5  | 0  |
| Q8CF89 | Mitogen-activated protein kinase kinase kinase 7-interacting protein 1 (TGF-beta-activated kinase 1-binding protein 1) (TAK1-binding protein 1) - Mus musculus (Mouse)           | 54867  | 15 | 0  | 4  | 0  |
| Q9EPK6 | Nucleotide exchange factor SIL1 precursor - Mus musculus (Mouse)                                                                                                                 | 52739  | 15 | 20 | 3  | 5  |
| P22091 | T-cell acute lymphocytic leukemia-1 protein homolog (TAL-1 protein) (Stem cell protein) - Mus musculus (Mouse)                                                                   | 34372  | 15 | 0  | 6  | 0  |
| Q60715 | Prolyl 4-hydroxylase subunit alpha-1 precursor (EC 1.14.11.2) (4-PH alpha-1) (Procollagen-proline,2-oxoglutarate-4-dioxygenase alpha-1 subunit) - Mus musculus (Mouse)           | 61157  | 15 | 0  | 3  | 0  |
| P70206 | Plexin-A1 precursor (Plexin-1) (Plex 1) - Mus musculus (Mouse)                                                                                                                   | 214158 | 15 | 0  | 11 | 0  |
| P51150 | Ras-related protein Rab-7 - Mus musculus (Mouse)                                                                                                                                 | 23760  | 15 | 0  | 35 | 0  |
| O08917 | Flotillin-1 - Mus musculus (Mouse)                                                                                                                                               | 47769  | 15 | 0  | 3  | 0  |
| Q99KB8 | Hydroxyacylglutathione hydrolase (EC 3.1.2.6) (Glyoxalase II) (Glx II) - Mus musculus (Mouse)                                                                                    | 29168  | 15 | 0  | 33 | 0  |
| Q61233 | Plastin-2 (L-plastin) (Lymphocyte cytosolic protein 1) (LCP-1) (65 kDa macrophage protein) (pp65) - Mus musculus (Mouse)                                                         | 70732  | 14 | 0  | 11 | 0  |

|        |                                                                                                                                                                                                                                                          |        |    |    |    |    |
|--------|----------------------------------------------------------------------------------------------------------------------------------------------------------------------------------------------------------------------------------------------------------|--------|----|----|----|----|
| Q9JLT4 | Thioredoxin reductase 2, mitochondrial precursor (EC 1.8.1.9) (TR3) - Mus musculus (Mouse)                                                                                                                                                               | 57204  | 14 | 0  | 5  | 0  |
| Q8C6B9 | 40S ribosomal protein S19-binding protein 1 (RPS19-binding protein 1) (S19BP) - Mus musculus (Mouse)                                                                                                                                                     | 16082  | 14 | 0  | 4  | 0  |
| Q78YY6 | DnaJ homolog subfamily C member 15 - Mus musculus (Mouse)                                                                                                                                                                                                | 15943  | 14 | 0  | 4  | 0  |
| Q3U288 | Zinc finger protein 710 - Mus musculus (Mouse)                                                                                                                                                                                                           | 76486  | 14 | 22 | 2  | 6  |
| P32114 | Paired box protein Pax-2 - Mus musculus (Mouse)                                                                                                                                                                                                          | 44964  | 14 | 0  | 3  | 0  |
| Q61464 | Zinc finger protein 638 (Nuclear protein 220) (Zinc-finger matrix-like protein) - Mus musculus (Mouse)                                                                                                                                                   | 219196 | 14 | 0  | 45 | 0  |
| Q60751 | Insulin-like growth factor 1 receptor precursor (EC 2.7.10.1) (Insulin-like growth factor I receptor) (IGF-I receptor) (CD221 antigen) [Contains: Insulin-like growth factor 1 receptor alpha chain; Insulin-like growth factor 1 receptor beta chain] - | 158197 | 14 | 0  | 13 | 0  |
| Q6NX16 | Uncharacterized protein KIAA0460 - Mus musculus (Mouse)                                                                                                                                                                                                  | 157003 | 14 | 16 | 13 | 9  |
| P07903 | DNA excision repair protein ERCC-1 - Mus musculus (Mouse)                                                                                                                                                                                                | 33291  | 14 | 0  | 11 | 0  |
| Q9Z275 | Cellular retinaldehyde-binding protein (CRALBP) - Mus musculus (Mouse)                                                                                                                                                                                   | 36670  | 14 | 0  | 3  | 0  |
| P03985 | T-cell receptor gamma chain C region C7.5 - Mus musculus (Mouse)                                                                                                                                                                                         | 20069  | 14 | 0  | 5  | 0  |
| Q99KK7 | Dipeptidyl-peptidase 3 (EC 3.4.14.4) (Dipeptidyl-peptidase III) (DPP III) (Dipeptidyl aminopeptidase III) (Dipeptidyl arylamidase III) - Mus musculus (Mouse)                                                                                            | 83258  | 14 | 18 | 23 | 19 |
| P97401 | Secreted frizzled-related protein 3 precursor (sFRP-3) (Frizzled-related protein 1) (FrzB-1) (Frezzed) (Fritz) - Mus musculus (Mouse)                                                                                                                    | 37070  | 14 | 0  | 8  | 0  |

|        |                                                                                                                                                                                                                                                           |        |    |    |    |   |
|--------|-----------------------------------------------------------------------------------------------------------------------------------------------------------------------------------------------------------------------------------------------------------|--------|----|----|----|---|
| Q99JG3 | Annexin A13 (Annexin XIII) - Mus musculus (Mouse)                                                                                                                                                                                                         | 36070  | 14 | 0  | 10 | 0 |
| Q8BTY1 | Kynurenine--oxoglutarate transaminase 1 (EC 2.6.1.7) (Kynurenine--oxoglutarate transaminase I) (Kynurenine aminotransferase I) (KATI) (Glutamine--phenylpyruvate transaminase) (EC 2.6.1.64) (Glutamine transaminase K) (GTK) (Cysteine-S-conjugate beta- | 47932  | 14 | 0  | 2  | 0 |
| P98197 | Probable phospholipid-transporting ATPase 1H (EC 3.6.3.1) (ATPase class I type 11A) (ATPase IS) - Mus musculus (Mouse)                                                                                                                                    | 137296 | 14 | 0  | 12 | 0 |
| Q9DCW4 | Electron transfer flavoprotein subunit beta (Beta-ETF) - Mus musculus (Mouse)                                                                                                                                                                             | 27834  | 14 | 0  | 7  | 0 |
| Q9CUN6 | Smad ubiquitination regulatory factor 1 (EC 6.3.2.-) (Ubiquitin--protein ligase SMURF1) (Smad-specific E3 ubiquitin ligase 1) - Mus musculus (Mouse)                                                                                                      | 84159  | 14 | 0  | 5  | 0 |
| P46935 | E3 ubiquitin-protein ligase NEDD4 (EC 6.3.2.-) (Neural precursor cell expressed developmentally down-regulated protein 4) - Mus musculus (Mouse)                                                                                                          | 103155 | 14 | 24 | 4  | 9 |
| Q8K4Z6 | G-protein coupled receptor family C group 6 member A precursor - Mus musculus (Mouse)                                                                                                                                                                     | 106141 | 14 | 0  | 9  | 0 |
| Q6PR54 | Telomere-associated protein RIF1 (Rap1-interacting factor 1 homolog) (mRif1) - Mus musculus (Mouse)                                                                                                                                                       | 268116 | 14 | 0  | 25 | 0 |
| Q8R216 | NAD-dependent deacetylase sirtuin-4 (EC 3.5.1.-) (SIR2-like protein 4) - Mus musculus (Mouse)                                                                                                                                                             | 38044  | 14 | 0  | 4  | 0 |

|        |                                                                                                                                                                                                                                                           |        |    |    |    |    |
|--------|-----------------------------------------------------------------------------------------------------------------------------------------------------------------------------------------------------------------------------------------------------------|--------|----|----|----|----|
| Q9D2G2 | Dihydrolipoyllysine-residue succinyltransferase component of 2-oxoglutarate dehydrogenase complex, mitochondrial precursor (EC 2.3.1.61) (Dihydrolipoamide succinyltransferase component of 2-oxoglutarate dehydrogenase complex) (E2) (E2K) - Mus muscul | 49306  | 14 | 0  | 5  | 0  |
| P06804 | Tumor necrosis factor precursor (TNF-alpha) (Tumor necrosis factor ligand superfamily member 2) (TNF-a) (Cachectin) [Contains: Tumor necrosis factor, membrane form; Tumor necrosis factor, soluble form] - Mus musculus (Mouse)                          | 26164  | 14 | 0  | 3  | 0  |
| Q99P50 | Growth hormone secretagogue receptor type 1 (GHS-R) (GH-releasing peptide receptor) (GHRP) (Ghrelin receptor) - Mus musculus (Mouse)                                                                                                                      | 41513  | 14 | 0  | 9  | 0  |
| Q9DCU9 | Dihydrodipicolinate synthase-like, mitochondrial precursor (EC 4.-.-.-) (DHDPS-like protein) - Mus musculus (Mouse)                                                                                                                                       | 34964  | 14 | 0  | 8  | 0  |
| Q9ERU3 | Zinc finger protein 22 (Zinc finger protein 422) (Krox-25 protein) (Krox-26 protein) - Mus musculus (Mouse)                                                                                                                                               | 28018  | 14 | 0  | 11 | 0  |
| Q69ZZ6 | Transmembrane and coiled-coil domains protein 1 - Mus musculus (Mouse)                                                                                                                                                                                    | 71998  | 14 | 0  | 3  | 0  |
| Q9Z0L0 | Trophoblast glycoprotein precursor (5T4 oncofetal trophoblast glycoprotein) (5T4 oncotrophoblast glycoprotein) - Mus musculus (Mouse)                                                                                                                     | 46983  | 14 | 0  | 1  | 0  |
| P42225 | Signal transducer and activator of transcription 1 - Mus musculus (Mouse)                                                                                                                                                                                 | 87826  | 14 | 0  | 11 | 0  |
| Q9D7D7 | Claudin-23 - Mus musculus (Mouse)                                                                                                                                                                                                                         | 33011  | 14 | 0  | 3  | 0  |
| Q8C3J5 | Dedicator of cytokinesis protein 2 (Protein Hch) - Mus musculus (Mouse)                                                                                                                                                                                   | 212966 | 14 | 0  | 28 | 0  |
| P35761 | Dual specificity protein kinase TTK (EC 2.7.12.1) (ESK) (PYT) - Mus musculus (Mouse)                                                                                                                                                                      | 97063  | 14 | 34 | 9  | 13 |



|                                                                                                                                   |                                                                                                                                                                     |        |    |    |    |    |
|-----------------------------------------------------------------------------------------------------------------------------------|---------------------------------------------------------------------------------------------------------------------------------------------------------------------|--------|----|----|----|----|
| P51910                                                                                                                            | Apolipoprotein D precursor (ApoD) (ApoD) - Mus musculus (Mouse)                                                                                                     | 21744  | 14 | 14 | 3  | 8  |
| Q52KP5                                                                                                                            | Protein FAM55D precursor - Mus musculus (Mouse)                                                                                                                     | 62139  | 14 | 17 | 23 | 8  |
| Q61545                                                                                                                            | RNA-binding protein EWS - Mus musculus (Mouse)                                                                                                                      | 68661  | 14 | 0  | 7  | 0  |
| Q91ZT9                                                                                                                            | Ankyrin repeat and SOCS box protein 8 (ASB-8) - Mus musculus (Mouse)                                                                                                | 32228  | 14 | 0  | 12 | 0  |
| P28828                                                                                                                            | Receptor-type tyrosine-protein phosphatase mu precursor (EC 3.1.3.48) (Protein-tyrosine phosphatase mu) (R-PTP-mu) - Mus musculus (Mouse)                           | 165258 | 14 | 16 | 8  | 4  |
| Q5SYL1                                                                                                                            | Uncharacterized serine/threonine-protein kinase SgK494 (EC 2.7.11.1) (Sugen kinase 494) - Mus musculus (Mouse)                                                      | 32175  | 14 | 0  | 6  | 0  |
| Q80ZW0                                                                                                                            | Serine/threonine-protein kinase 35 (EC 2.7.11.1) - Mus musculus (Mouse)                                                                                             | 45317  | 14 | 50 | 21 | 17 |
| P20826                                                                                                                            | Kit ligand precursor (C-kit ligand) (Stem cell factor) (SCF) (Mast cell growth factor) (MGF) (Hematopoietic growth factor KL) (Steel factor) - Mus musculus (Mouse) | 30911  | 14 | 0  | 12 | 0  |
| O70200                                                                                                                            | Allograft inflammatory factor 1 (AIF-1) (Ionized calcium-binding adapter molecule 1) - Mus musculus (Mouse)                                                         | 16900  | 14 | 14 | 4  | 6  |
| Q8K0T7                                                                                                                            | Unc-13 homolog C (Munc13-3) (Fragment) - Mus musculus (Mouse)                                                                                                       | 162521 | 14 | 0  | 24 | 0  |
| Q9WVB4                                                                                                                            | Slit homolog 3 protein precursor (Slit-3) (Slit3) - Mus musculus (Mouse)                                                                                            | 173590 | 14 | 16 | 17 | 9  |
| Q9Z0T9                                                                                                                            | Integrin beta-6 precursor - Mus musculus (Mouse)                                                                                                                    | 89292  | 14 | 0  | 5  | 0  |
| Q9CR21                                                                                                                            | Acyl carrier protein, mitochondrial precursor (ACP) (NADH-ubiquinone oxidoreductase 9.6 kDa subunit) (CI-SDAP) - Mus musculus (Mouse)                               | 17644  | 14 | 0  | 4  | 0  |
| ms08135_B                                                                                                                         |                                                                                                                                                                     |        | 0  |    | 0  |    |
| 2008-08-28T14:16:19Z                                                                                                              |                                                                                                                                                                     |        | 0  |    | 0  |    |
| <a href="http://ms-searching2.rockefeller.edu/mascot/cgi/master_re">http://ms-searching2.rockefeller.edu/mascot/cgi/master_re</a> |                                                                                                                                                                     |        | 0  |    | 0  |    |
| C:\DATA\ms08135\ms08135_B.dta                                                                                                     |                                                                                                                                                                     |        | 0  |    | 0  |    |
| 31498                                                                                                                             |                                                                                                                                                                     |        | 0  |    | 0  |    |

|        |                                                                                                                                                                                                           |        |   |      |   |    |
|--------|-----------------------------------------------------------------------------------------------------------------------------------------------------------------------------------------------------------|--------|---|------|---|----|
| P05215 | Tubulin alpha-4 chain (Alpha-tubulin 4) (Alpha-tubulin isotype M-alpha-4) - Mus musculus (Mouse)                                                                                                          | 50634  | 0 | 1083 | 0 | 80 |
| P10854 | Histone H2B type 1-M (H2B 291B) - Mus musculus (Mouse)                                                                                                                                                    | 13928  | 0 | 999  | 0 | 77 |
| Q9D2U9 | Histone H2B type 3-A - Mus musculus (Mouse)                                                                                                                                                               | 13986  | 0 | 806  | 0 | 54 |
| Q9Z331 | Keratin, type II cytoskeletal 6B (Cytokeratin-6B) (CK 6B) (K6b keratin) (Keratin-6 beta) (mK6-beta) - Mus musculus (Mouse)                                                                                | 60627  | 0 | 550  | 0 | 33 |
| P14873 | Microtubule-associated protein 1B (MAP 1B) (MAP1.2) (MAP1(X)) [Contains: MAP1 light chain LC1] - Mus musculus (Mouse)                                                                                     | 271556 | 0 | 490  | 0 | 44 |
| P84228 | Histone H3.2 - Mus musculus (Mouse)                                                                                                                                                                       | 15436  | 0 | 417  | 0 | 68 |
| P63242 | Eukaryotic translation initiation factor 5A-1 (eIF-5A-1) (eIF-5A1) (Eukaryotic initiation factor 5A isoform 1) (eIF-5A) (eIF-4D) - Mus musculus (Mouse)                                                   | 17049  | 0 | 379  | 0 | 15 |
| Q8BSL7 | ADP-ribosylation factor 2 - Mus musculus (Mouse)                                                                                                                                                          | 20790  | 0 | 270  | 0 | 10 |
| P84084 | ADP-ribosylation factor 5 - Mus musculus (Mouse)                                                                                                                                                          | 20631  | 0 | 210  | 0 | 13 |
| Q8CDN6 | Thioredoxin-like protein 1 (32 kDa thioredoxin-related protein) - Mus musculus (Mouse)                                                                                                                    | 32616  | 0 | 173  | 0 | 3  |
| Q9JIF0 | Protein arginine N-methyltransferase 1 (EC 2.1.1.-) - Mus musculus (Mouse)                                                                                                                                | 43035  | 0 | 150  | 0 | 9  |
| P61082 | NEDD8-conjugating enzyme Ubc12 (EC 6.3.2.-) (Ubiquitin-conjugating enzyme E2 M) (NEDD8 protein ligase) (NEDD8 carrier protein) - Mus musculus (Mouse)                                                     | 21172  | 0 | 123  | 0 | 3  |
| P57722 | Poly(rC)-binding protein 3 (Alpha CP3) - Mus musculus (Mouse)                                                                                                                                             | 36171  | 0 | 122  | 0 | 8  |
| P14211 | Calreticulin precursor (CRP55) (Calregulin) (HACBP) (ERp60) - Mus musculus (Mouse)                                                                                                                        | 48136  | 0 | 120  | 0 | 7  |
| P63085 | Mitogen-activated protein kinase 1 (EC 2.7.11.24) (Extracellular signal-regulated kinase 2) (ERK-2) (Mitogen-activated protein kinase 2) (MAP kinase 2) (MAPK 2) (p42-MAPK) (ERT1) - Mus musculus (Mouse) | 41648  | 0 | 112  | 0 | 19 |

|        |                                                                                                                                                                                               |       |   |     |   |    |
|--------|-----------------------------------------------------------------------------------------------------------------------------------------------------------------------------------------------|-------|---|-----|---|----|
| Q11136 | Xaa-Pro dipeptidase (EC 3.4.13.9) (X-Pro dipeptidase) (Proline dipeptidase) (Prolidase) (Imidodipeptidase) (Peptidase 4) - Mus musculus (Mouse)                                               | 55962 | 0 | 108 | 0 | 8  |
| P63330 | Serine/threonine-protein phosphatase 2A catalytic subunit alpha isoform (EC 3.1.3.16) (PP2A-alpha) - Mus musculus (Mouse)                                                                     | 36156 | 0 | 101 | 0 | 6  |
| P62889 | 60S ribosomal protein L30 - Mus musculus (Mouse)                                                                                                                                              | 12947 | 0 | 98  | 0 | 3  |
| P27773 | Protein disulfide-isomerase A3 precursor (EC 5.3.4.1) (Disulfide isomerase ER-60) (ERp60) (58 kDa microsomal protein) (p58) (ERp57) - Mus musculus (Mouse)                                    | 57042 | 0 | 98  | 0 | 14 |
| Q9R1P4 | Proteasome subunit alpha type 1 (EC 3.4.25.1) (Proteasome component C2) (Macropain subunit C2) (Multicatalytic endopeptidase complex subunit C2) (Proteasome nu chain) - Mus musculus (Mouse) | 29813 | 0 | 95  | 0 | 8  |
| Q9D1G1 | Ras-related protein Rab-1B - Mus musculus (Mouse)                                                                                                                                             | 22344 | 0 | 91  | 0 | 8  |
| P61027 | Ras-related protein Rab-10 - Mus musculus (Mouse)                                                                                                                                             | 22755 | 0 | 82  | 0 | 3  |
| P62746 | Rho-related GTP-binding protein RhoB precursor - Mus musculus (Mouse)                                                                                                                         | 22565 | 0 | 82  | 0 | 3  |
| P10518 | Delta-aminolevulinic acid dehydratase (EC 4.2.1.24) (Porphobilinogen synthase) (ALADH) - Mus musculus (Mouse)                                                                                 | 36456 | 0 | 78  | 0 | 6  |
| Q9DAR7 | Scavenger mRNA decapping enzyme DcpS (EC 3.-.-.) (DCS-1) (Hint-related 7meGMP-directed hydrolase) (Histidine triad protein member 5) (HINT-5) - Mus musculus (Mouse)                          | 39078 | 0 | 76  | 0 | 8  |
| P35279 | Ras-related protein Rab-6A (Rab-6) - Mus musculus                                                                                                                                             | 23689 | 0 | 76  | 0 | 9  |
| P97855 | Ras GTPase-activating protein-binding protein 1 (EC 3.6.1.-) (G3BP-1) (ATP-dependent DNA helicase VIII) (HDH-VIII) (GAP SH3 domain-binding protein 1) - Mus musculus (Mouse)                  | 51854 | 0 | 75  | 0 | 15 |

|        |                                                                                                                                                                                        |        |   |    |   |    |
|--------|----------------------------------------------------------------------------------------------------------------------------------------------------------------------------------------|--------|---|----|---|----|
| Q61792 | LIM and SH3 domain protein 1 (LASP-1) (MLN 50) - Mus musculus (Mouse)                                                                                                                  | 30374  | 0 | 72 | 0 | 4  |
| P43274 | Histone H1.4 (H1 VAR.2) (H1e) - Mus musculus (Mouse)                                                                                                                                   | 21964  | 0 | 72 | 0 | 7  |
| P62849 | 40S ribosomal protein S24 - Mus musculus (Mouse)                                                                                                                                       | 15413  | 0 | 72 | 0 | 8  |
| P33175 | Kinesin heavy chain isoform 5A (Neuronal kinesin heavy chain) (NKHC) (Kinesin heavy chain neuron-specific 1) - Mus musculus (Mouse)                                                    | 117745 | 0 | 66 | 0 | 20 |
| P28738 | Kinesin heavy chain isoform 5C (Kinesin heavy chain neuron-specific 2) - Mus musculus (Mouse)                                                                                          | 109743 | 0 | 66 | 0 | 15 |
| Q8CG03 | cGMP-specific 3~,5~-cyclic phosphodiesterase (EC 3.1.4.35) (CGB-PDE) (cGMP-binding cGMP-specific phosphodiesterase) - Mus musculus (Mouse)                                             | 99784  | 0 | 65 | 0 | 12 |
| P47857 | 6-phosphofructokinase, muscle type (EC 2.7.1.11) (Phosphofructokinase 1) (Phosphohexokinase) (Phosphofructo-1-kinase isozyme A) (PFK-A) (Phosphofructokinase-M) - Mus musculus (Mouse) | 86070  | 0 | 64 | 0 | 8  |
| Q8BPU7 | Engulfment and cell motility protein 1 (CED-12 homolog) - Mus musculus (Mouse)                                                                                                         | 84623  | 0 | 64 | 0 | 12 |
| Q9R1T2 | SUMO-activating enzyme subunit 1 (Ubiquitin-like 1-activating enzyme E1A) - Mus musculus (Mouse)                                                                                       | 39052  | 0 | 62 | 0 | 6  |
| Q99L47 | Hsc70-interacting protein (Hip) (Protein ST13 homolog) (Protein FAM10A1) - Mus musculus (Mouse)                                                                                        | 41801  | 0 | 62 | 0 | 3  |
| Q9QZD9 | Eukaryotic translation initiation factor 3 subunit 2 (eIF-3 beta) (eIF3 p36) (eIF3i) (TGF-beta receptor-interacting protein 1) (TRIP-1) - Mus musculus (Mouse)                         | 36837  | 0 | 62 | 0 | 6  |

|        |                                                                                                                                                                                                      |        |   |    |   |    |
|--------|------------------------------------------------------------------------------------------------------------------------------------------------------------------------------------------------------|--------|---|----|---|----|
| Q62095 | ATP-dependent RNA helicase DDX3Y (EC 3.6.1.-) (DEAD box protein 3, Y-chromosomal) (DEAD-box RNA helicase DEAD2) (mDEAD2) (D1Pas1-related sequence 1) - Mus musculus (Mouse)                          | 73838  | 0 | 62 | 0 | 65 |
| Q62167 | ATP-dependent RNA helicase DDX3X (EC 3.6.1.-) (DEAD box protein 3, X-chromosomal) (DEAD box RNA helicase DEAD3) (mDEAD3) (Embryonic RNA helicase) (D1Pas1-related sequence 2) - Mus musculus (Mouse) | 73455  | 0 | 62 | 0 | 64 |
| Q80X13 | Eukaryotic translation initiation factor 4 gamma 3 (eIF-4-gamma 3) (eIF-4G 3) (eIF4G 3) (eIF-4-gamma II) (eIF4GII) - Mus musculus (Mouse)                                                            | 176092 | 0 | 58 | 0 | 17 |
| P63087 | Serine/threonine-protein phosphatase PP1-gamma catalytic subunit (EC 3.1.3.16) (PP-1G) (Protein phosphatase 1C catalytic subunit) - Mus musculus (Mouse)                                             | 37701  | 0 | 57 | 0 | 5  |
| P50396 | Rab GDP dissociation inhibitor alpha (Rab GDI alpha) (Guanosine diphosphate dissociation inhibitor 1) (GDI-1) - Mus musculus (Mouse)                                                                 | 51059  | 0 | 56 | 0 | 7  |
| P26883 | FK506-binding protein 1A (EC 5.2.1.8) (Peptidyl-prolyl cis-trans isomerase) (PPIase) (Rotamase) (12 kDa FKBP) (FKBP-12) (Immunophilin FKBP12) - Mus musculus (Mouse)                                 | 11972  | 0 | 55 | 0 | 4  |
| P83510 | Traf2 and NCK-interacting protein kinase (EC 2.7.11.1) (Fragments) - Mus musculus (Mouse)                                                                                                            | 103850 | 0 | 54 | 0 | 17 |
| O70492 | Sorting nexin-3 (SDP3 protein) - Mus musculus (Mouse)                                                                                                                                                | 18803  | 0 | 54 | 0 | 2  |
| P35283 | Ras-related protein Rab-12 (Rab-13) - Mus musculus (Mouse)                                                                                                                                           | 27653  | 0 | 53 | 0 | 11 |
| Q8BHD0 | Ras-related protein Rab-39A (Rab-39) - Mus musculus (Mouse)                                                                                                                                          | 25361  | 0 | 53 | 0 | 4  |
| Q8BHC1 | Ras-related protein Rab-39B - Mus musculus (Mouse)                                                                                                                                                   | 24849  | 0 | 53 | 0 | 5  |

|        |                                                                                                                                                                               |        |   |    |   |    |
|--------|-------------------------------------------------------------------------------------------------------------------------------------------------------------------------------|--------|---|----|---|----|
| P35276 | Ras-related protein Rab-3D - Mus musculus (Mouse)                                                                                                                             | 24629  | 0 | 53 | 0 | 11 |
| Q9JKM7 | Ras-related protein Rab-37 - Mus musculus (Mouse)                                                                                                                             | 24811  | 0 | 53 | 0 | 2  |
| Q9CZT8 | Ras-related protein Rab-3B - Mus musculus (Mouse)                                                                                                                             | 24969  | 0 | 53 | 0 | 3  |
| Q923S9 | Ras-related protein Rab-30 - Mus musculus (Mouse)                                                                                                                             | 23386  | 0 | 53 | 0 | 4  |
| Q8CG50 | Ras-related protein Rab-43 - Mus musculus (Mouse)                                                                                                                             | 23477  | 0 | 53 | 0 | 4  |
| Q91V41 | Ras-related protein Rab-14 - Mus musculus (Mouse)                                                                                                                             | 24110  | 0 | 53 | 0 | 2  |
| Q504M8 | Ras-related protein Rab-26 - Mus musculus (Mouse)                                                                                                                             | 28772  | 0 | 53 | 0 | 3  |
| P63011 | Ras-related protein Rab-3A - Mus musculus (Mouse)                                                                                                                             | 25182  | 0 | 53 | 0 | 3  |
| P62823 | Ras-related protein Rab-3C - Mus musculus (Mouse)                                                                                                                             | 26084  | 0 | 53 | 0 | 2  |
| O35963 | Ras-related protein Rab-33B - Mus musculus (Mouse)                                                                                                                            | 26206  | 0 | 53 | 0 | 1  |
| Q8JZQ9 | Eukaryotic translation initiation factor 3 subunit 9 (eIF-3 eta) (eIF3 p116) - Mus musculus (Mouse)                                                                           | 91712  | 0 | 52 | 0 | 16 |
| P07356 | Annexin A2 (Annexin II) (Lipocortin II) (Calpactin I heavy chain) (Chromobindin-8) (p36) (Protein I) (Placental anticoagulant protein IV) (PAP-IV) - Mus musculus (Mouse)     | 38937  | 0 | 51 | 0 | 9  |
| P46638 | Ras-related protein Rab-11B - Mus musculus (Mouse)                                                                                                                            | 24589  | 0 | 49 | 0 | 4  |
| Q9QXE2 | DNA polymerase lambda (EC 2.7.7.7) (EC 4.2.99.-) (Pol Lambda) (DNA polymerase kappa) - Mus musculus (Mouse)                                                                   | 63530  | 0 | 48 | 0 | 10 |
| Q8BMQ2 | General transcription factor 3C polypeptide 4 (EC 2.3.1.48) (Transcription factor IIIC subunit delta) (TF3C-delta) (TFIIIC 90 kDa subunit) (TFIIIC 90) - Mus musculus (Mouse) | 92905  | 0 | 46 | 0 | 9  |
| Q9QXL2 | Kinesin family member 21A - Mus musculus (Mouse)                                                                                                                              | 187846 | 0 | 45 | 0 | 23 |
| Q9CX34 | Suppressor of G2 allele of SKP1 homolog - Mus musculus (Mouse)                                                                                                                | 38420  | 0 | 44 | 0 | 7  |
| Q9D0J8 | Parathymosin - Mus musculus (Mouse)                                                                                                                                           | 11423  | 0 | 43 | 0 | 3  |
| Q6IRU2 | Tropomyosin alpha-4 chain (Tropomyosin-4) - Mus musculus (Mouse)                                                                                                              | 28564  | 0 | 42 | 0 | 4  |

|        |                                                                                                                                                                                                                      |        |   |    |   |    |
|--------|----------------------------------------------------------------------------------------------------------------------------------------------------------------------------------------------------------------------|--------|---|----|---|----|
| Q99K48 | Non-POU domain-containing octamer-binding protein (NonO protein) - Mus musculus (Mouse)                                                                                                                              | 54620  | 0 | 41 | 0 | 7  |
| Q8BRM2 | N-terminal kinase-like-binding protein 1 (NTKL-binding protein 1) (NTKL-BP1) (mNTKL-BP1) (SCY1-like 1-binding protein 1) (SCYL1-binding protein 1) (SCYL1-BP1) - Mus musculus (Mouse)                                | 41803  | 0 | 41 | 0 | 16 |
| Q8C636 | FACT complex subunit SPT16 (Facilitates chromatin transcription complex subunit SPT16) (FACT 140 kDa subunit) (FACTp140) (Chromatin-specific transcription elongation factor 140 kDa subunit) - Mus musculus (Mouse) | 120320 | 0 | 41 | 0 | 24 |
| Q8C2E7 | Uncharacterized protein KIAA0196 - Mus musculus (Mouse)                                                                                                                                                              | 134880 | 0 | 40 | 0 | 22 |
| P35235 | Tyrosine-protein phosphatase non-receptor type 11 (EC 3.1.3.48) (Protein-tyrosine phosphatase SYP) (SH-PTP2) (SHP-2) (Shp2) - Mus musculus (Mouse)                                                                   | 68988  | 0 | 40 | 0 | 12 |
| Q8BJL1 | F-box only protein 30 - Mus musculus (Mouse)                                                                                                                                                                         | 84599  | 0 | 39 | 0 | 16 |
| P00375 | Dihydrofolate reductase (EC 1.5.1.3) - Mus musculus (Mouse)                                                                                                                                                          | 21649  | 0 | 38 | 0 | 8  |
| Q62048 | Astrocytic phosphoprotein PEA-15 - Mus musculus (Mouse)                                                                                                                                                              | 15102  | 0 | 38 | 0 | 4  |
| Q924W5 | Structural maintenance of chromosomes protein 6 (mSMC6) - Mus musculus (Mouse)                                                                                                                                       | 128201 | 0 | 38 | 0 | 21 |
| Q9CS42 | Ribose-phosphate pyrophosphokinase II (EC 2.7.6.1) (Phosphoribosyl pyrophosphate synthetase II) (PRS-II) - Mus musculus (Mouse)                                                                                      | 35163  | 0 | 38 | 0 | 3  |
| Q61897 | Keratin, type I cuticular Ha3 (Hair keratin, type I Ha3) (Keratin 33B) (Fragment) - Mus musculus (Mouse)                                                                                                             | 38009  | 0 | 37 | 0 | 5  |

|        |                                                                                                                                                                                                                                                           |        |   |    |   |    |
|--------|-----------------------------------------------------------------------------------------------------------------------------------------------------------------------------------------------------------------------------------------------------------|--------|---|----|---|----|
| Q63844 | Mitogen-activated protein kinase 3 (EC 2.7.11.24) (Extracellular signal-regulated kinase 1) (ERK-1) (Insulin-stimulated MAP2 kinase) (MAP kinase 1) (MAPK 1) (p44-ERK1) (ERT2) (p44-MAPK) (Microtubule-associated protein 2 kinase) (MNK1) - Mus musculus | 43381  | 0 | 37 | 0 | 14 |
| Q99JX1 | Transcription initiation factor TFIIID subunit 11 (Transcription initiation factor TFIIID 28 kDa subunit) (TAF(II)28) (TAFII-28) (TAFII28) (TFIID subunit p30-beta) - Mus musculus (Mouse)                                                                | 23376  | 0 | 37 | 0 | 7  |
| P35922 | Fragile X mental retardation protein 1 homolog (Protein FMR-1) (FMRP) (mFmr1p) - Mus musculus (Mouse)                                                                                                                                                     | 69232  | 0 | 36 | 0 | 8  |
| Q80TG1 | Uncharacterized protein KIAA1267 - Mus musculus (Mouse)                                                                                                                                                                                                   | 114022 | 0 | 36 | 0 | 18 |
| Q61211 | Ligatin - Mus musculus (Mouse)                                                                                                                                                                                                                            | 63531  | 0 | 36 | 0 | 5  |
| P70694 | Estradiol 17 beta-dehydrogenase 5 (EC 1.1.1.-) (17-beta-HSD 5) - Mus musculus (Mouse)                                                                                                                                                                     | 37423  | 0 | 36 | 0 | 8  |
| Q91ZR3 | Host cell factor-binding transcription factor Zhangfei (HCF-binding transcription factor Zhangfei) (Tyrosine kinase-associated leucine zipper protein LAZip) - Mus musculus (Mouse)                                                                       | 29266  | 0 | 36 | 0 | 1  |
| Q80TE4 | Signal-induced proliferation-associated 1-like protein 2 - Mus musculus (Mouse)                                                                                                                                                                           | 191248 | 0 | 36 | 0 | 16 |
| Q3UM45 | Protein phosphatase 1 regulatory subunit 7 (Protein phosphatase 1 regulatory subunit 22) - Mus musculus (Mouse)                                                                                                                                           | 41380  | 0 | 35 | 0 | 6  |
| Q9Z2X1 | Heterogeneous nuclear ribonucleoprotein F (hnRNP F) - Mus musculus (Mouse)                                                                                                                                                                                | 46043  | 0 | 35 | 0 | 2  |
| O70423 | Membrane copper amine oxidase (EC 1.4.3.6) (Semicarbazide-sensitive amine oxidase) (SSAO) (Vascular adhesion protein 1) (VAP-1) - Mus musculus (Mouse)                                                                                                    | 85107  | 0 | 35 | 0 | 4  |



|        |                                                                                                                                                                                                     |        |   |    |   |    |
|--------|-----------------------------------------------------------------------------------------------------------------------------------------------------------------------------------------------------|--------|---|----|---|----|
| P10922 | Histone H1.0 (Histone H1(0)) (Histone H1~) - Mus musculus (Mouse)                                                                                                                                   | 20848  | 0 | 35 | 0 | 2  |
| Q60668 | Heterogeneous nuclear ribonucleoprotein D0 (hnRNP D0) (AU-rich element RNA-binding protein 1) - Mus musculus (Mouse)                                                                                | 38501  | 0 | 34 | 0 | 5  |
| Q8CHP6 | Polyhomeotic-like protein 3 - Mus musculus (Mouse)                                                                                                                                                  | 106171 | 0 | 34 | 0 | 6  |
| Q400C8 | Archaemetzincin-2 (EC 3.-.-.-) (Archeobacterial metalloproteinase-like protein 2) - Mus musculus (Mouse)                                                                                            | 41942  | 0 | 34 | 0 | 12 |
| Q8BG05 | Heterogeneous nuclear ribonucleoprotein A3 (hnRNP A3) - Mus musculus (Mouse)                                                                                                                        | 39856  | 0 | 34 | 0 | 5  |
| Q60664 | Lymphoid-restricted membrane protein (Protein Jaw1) - Mus musculus (Mouse)                                                                                                                          | 60235  | 0 | 34 | 0 | 28 |
| P35918 | Vascular endothelial growth factor receptor 2 precursor (EC 2.7.10.1) (VEGFR-2) (Protein-tyrosine kinase receptor flk-1) (Fetal liver kinase 1) (Kinase NYK) (CD309 antigen) - Mus musculus (Mouse) | 154301 | 0 | 34 | 0 | 16 |
| P05622 | Beta platelet-derived growth factor receptor precursor (EC 2.7.10.1) (PDGF-R-beta) (CD140b antigen) - Mus musculus (Mouse)                                                                          | 123811 | 0 | 34 | 0 | 16 |
| P35917 | Vascular endothelial growth factor receptor 3 precursor (EC 2.7.10.1) (VEGFR-3) (Tyrosine-protein kinase receptor FLT4) - Mus musculus (Mouse)                                                      | 155029 | 0 | 34 | 0 | 11 |
| Q80Y86 | Mitogen-activated protein kinase 15 (EC 2.7.11.24) (Extracellular signal-regulated kinase 7) - Mus musculus (Mouse)                                                                                 | 61040  | 0 | 34 | 0 | 8  |
| P00687 | Alpha-amylase 1 precursor (EC 3.2.1.1) (1,4-alpha-D-glucan glucanohydrolase) (Salivary and hepatic alpha-amylase) - Mus musculus (Mouse)                                                            | 58271  | 0 | 34 | 0 | 7  |
| P57780 | Alpha-actinin-4 (Non-muscle alpha-actinin 4) (F-actin cross-linking protein) - Mus musculus (Mouse)                                                                                                 | 105368 | 0 | 34 | 0 | 10 |

|        |                                                                                                                                                                                                             |        |   |    |   |    |
|--------|-------------------------------------------------------------------------------------------------------------------------------------------------------------------------------------------------------------|--------|---|----|---|----|
| Q7TPR4 | Alpha-actinin-1 (Alpha-actinin cytoskeletal isoform) (Non-muscle alpha-actinin-1) (F-actin cross-linking protein) - Mus musculus (Mouse)                                                                    | 103631 | 0 | 34 | 0 | 8  |
| Q9Z1Y4 | Thyroid receptor-interacting protein 6 (TRIP-6) (Zyxin-related protein 1) (ZRP-1) - Mus musculus (Mouse)                                                                                                    | 52383  | 0 | 34 | 0 | 11 |
| Q60654 | Killer cell lectin-like receptor 7 (T-cell surface glycoprotein Ly-49G) (Lymphocyte antigen 49g) (Ly-49g) - Mus musculus (Mouse)                                                                            | 33299  | 0 | 33 | 0 | 2  |
| Q8BWG9 | Calcium release-activated calcium channel protein 1 (Transmembrane protein 142A) (Protein orai-1) - Mus musculus (Mouse)                                                                                    | 33269  | 0 | 33 | 0 | 5  |
| P60762 | Mortality factor 4-like protein 1 (MORF-related gene 15 protein) (Transcription factor-like protein MRG15) (Testis-expressed gene 189 protein) - Mus musculus (Mouse)                                       | 41581  | 0 | 33 | 0 | 9  |
| P48967 | M-phase inducer phosphatase 3 (EC 3.1.3.48) (Dual specificity phosphatase Cdc25C) - Mus musculus (Mouse)                                                                                                    | 50698  | 0 | 33 | 0 | 7  |
| P21107 | Tropomyosin alpha-3 chain (Tropomyosin-3) (Tropomyosin gamma) - Mus musculus (Mouse)                                                                                                                        | 32900  | 0 | 32 | 0 | 2  |
| Q9DC70 | NADH dehydrogenase [ubiquinone] iron-sulfur protein 7, mitochondrial precursor (EC 1.6.5.3) (EC 1.6.99.3) (NADH-ubiquinone oxidoreductase 20 kDa subunit) (Complex I-20kD) (CI-20kD) - Mus musculus (Mouse) | 24952  | 0 | 32 | 0 | 11 |
| P58389 | Serine/threonine-protein phosphatase 2A regulatory subunit B~ (PP2A, subunit B~, PR53 isoform) (Phosphotyrosyl phosphatase activator) (PTPA) - Mus musculus (Mouse)                                         | 36972  | 0 | 32 | 0 | 5  |
| Q3UTH8 | Rho guanine nucleotide exchange factor 9 (Rac/Cdc42 guanine nucleotide exchange factor 9) (Collybistin) - Mus musculus (Mouse)                                                                              | 61458  | 0 | 31 | 0 | 17 |

|        |                                                                                                                                                                                      |        |   |    |   |    |
|--------|--------------------------------------------------------------------------------------------------------------------------------------------------------------------------------------|--------|---|----|---|----|
| Q78T81 | Protein FAM102A - Mus musculus (Mouse)                                                                                                                                               | 43260  | 0 | 31 | 0 | 10 |
| Q60900 | ELAV-like protein 3 (Hu-antigen C) (HuC) - Mus musculus (Mouse)                                                                                                                      | 39679  | 0 | 31 | 0 | 26 |
| Q9ERZ4 | Muscarinic acetylcholine receptor M2 - Mus musculus (Mouse)                                                                                                                          | 52223  | 0 | 31 | 0 | 8  |
| Q60875 | Rho/Rac guanine nucleotide exchange factor 2 (Lymphoid blast crisis-like 1) (LBC~S first cousin) (Oncogene LFC) (RHOBIN) - Mus musculus (Mouse)                                      | 112787 | 0 | 31 | 0 | 12 |
| Q88907 | E3 SUMO-protein ligase PIAS1 (Protein inhibitor of activated STAT protein 1) (DEAD/H box-binding protein 1) - Mus musculus (Mouse)                                                   | 72542  | 0 | 31 | 0 | 9  |
| Q8CFE4 | SCY1-like protein 2 (Coated vesicle-associated kinase of 104 kDa) - Mus musculus (Mouse)                                                                                             | 103935 | 0 | 31 | 0 | 24 |
| Q9CQZ5 | NADH dehydrogenase [ubiquinone] 1 alpha subcomplex subunit 6 (EC 1.6.5.3) (EC 1.6.99.3) (NADH-ubiquinone oxidoreductase B14 subunit) (Complex I-B14) (CI-B14) - Mus musculus (Mouse) | 15273  | 0 | 30 | 0 | 5  |
| Q8C1B7 | Septin-11 - Mus musculus (Mouse)                                                                                                                                                     | 50005  | 0 | 30 | 0 | 9  |
| Q8BG32 | 26S proteasome non-ATPase regulatory subunit 11 (26S proteasome regulatory subunit S9) (26S proteasome regulatory subunit p44.5) - Mus musculus (Mouse)                              | 47692  | 0 | 30 | 0 | 6  |
| Q9JLI8 | Squamous cell carcinoma antigen recognized by T-cells 3 (SART-3) (mSART-3) (Tumor-rejection antigen SART3) - Mus musculus (Mouse)                                                    | 110405 | 0 | 30 | 0 | 5  |
| Q99N16 | Cytochrome P450 4F3 (EC 1.14.13.30) (CYPIVF3) (Leukotriene-B(4) omega-hydroxylase) (Leukotriene-B(4) 20-monooxygenase) (Cytochrome P450-LTB-omega) - Mus musculus (Mouse)            | 60487  | 0 | 30 | 0 | 9  |
| Q9R1T4 | Septin-6 - Mus musculus (Mouse)                                                                                                                                                      | 50044  | 0 | 30 | 0 | 13 |

|        |                                                                                                                                                                                                                                   |        |   |    |   |    |
|--------|-----------------------------------------------------------------------------------------------------------------------------------------------------------------------------------------------------------------------------------|--------|---|----|---|----|
| Q8CHH9 | Septin-8 - Mus musculus (Mouse)                                                                                                                                                                                                   | 50123  | 0 | 30 | 0 | 7  |
| P54822 | Adenylosuccinate lyase (EC 4.3.2.2) (Adenylosuccinase) (ASL) (ASASE) - Mus musculus (Mouse)                                                                                                                                       | 55457  | 0 | 30 | 0 | 11 |
| O88342 | WD repeat protein 1 (Actin-interacting protein 1) (AIP1) - Mus musculus (Mouse)                                                                                                                                                   | 67049  | 0 | 30 | 0 | 6  |
| Q9Z2Y3 | Homer protein homolog 1 (VASP/Ena-related gene up-regulated during seizure and LTP) (Vesl-1) - Mus musculus (Mouse)                                                                                                               | 41502  | 0 | 30 | 0 | 6  |
| Q7TPD3 | Roundabout homolog 2 precursor - Mus musculus (Mouse)                                                                                                                                                                             | 162002 | 0 | 30 | 0 | 4  |
| Q99MK9 | Ras association domain-containing protein 1 (Protein 123F2) - Mus musculus (Mouse)                                                                                                                                                | 39392  | 0 | 29 | 0 | 11 |
| Q7JJ13 | Bromodomain-containing protein 2 (Protein RING3) (Female sterile homeotic-related protein 1) (Fsg-1) - Mus musculus (Mouse)                                                                                                       | 88298  | 0 | 29 | 0 | 10 |
| P70677 | Caspase-3 precursor (EC 3.4.22.-) (CASP-3) (Apopain) (Cysteine protease CPP32) (Yama protein) (CPP-32) (SREBP cleavage activity 1) (SCA-1) (LICE) [Contains: Caspase-3 p17 subunit; Caspase-3 p12 subunit] - Mus musculus (Mouse) | 31911  | 0 | 29 | 0 | 5  |
| Q80XI7 | Vomeromodulin precursor - Mus musculus (Mouse)                                                                                                                                                                                    | 62751  | 0 | 29 | 0 | 9  |
| Q69ZM6 | Serine/threonine-protein kinase 36 (EC 2.7.11.1) (Fused homolog) - Mus musculus (Mouse)                                                                                                                                           | 140163 | 0 | 29 | 0 | 35 |
| Q810T2 | G2/mitotic-specific cyclin-B3 - Mus musculus (Mouse)                                                                                                                                                                              | 159668 | 0 | 29 | 0 | 22 |
| Q62252 | Sperm surface protein Sp17 (Sperm autoantigenic protein 17) - Mus musculus (Mouse)                                                                                                                                                | 17342  | 0 | 29 | 0 | 4  |
| Q80U72 | Protein LAP4 (Protein scribble homolog) - Mus musculus (Mouse)                                                                                                                                                                    | 175150 | 0 | 29 | 0 | 22 |
| Q9CWR8 | DNA (cytosine-5)-methyltransferase 3-like - Mus musculus (Mouse)                                                                                                                                                                  | 49159  | 0 | 29 | 0 | 9  |

|        |                                                                                                                                                                              |        |   |    |   |    |
|--------|------------------------------------------------------------------------------------------------------------------------------------------------------------------------------|--------|---|----|---|----|
| Q7M6U3 | Testis-expressed protein 14 (Testis-expressed sequence 14) - Mus musculus (Mouse)                                                                                            | 163866 | 0 | 28 | 0 | 14 |
| Q64G17 | Acidic leucine-rich nuclear phosphoprotein 32 family member C - Mus musculus (Mouse)                                                                                         | 14229  | 0 | 28 | 0 | 4  |
| Q62383 | Transcription elongation factor SPT6 - Mus musculus (Mouse)                                                                                                                  | 200159 | 0 | 28 | 0 | 17 |
| Q9CWI3 | BRCA2 and CDKN1A-interacting protein - Mus musculus (Mouse)                                                                                                                  | 36262  | 0 | 28 | 0 | 15 |
| P09103 | Protein disulfide-isomerase precursor (EC 5.3.4.1) (PDI) (Prolyl 4-hydroxylase subunit beta) (Cellular thyroid hormone-binding protein) (p55) (Erp59) - Mus musculus (Mouse) | 57507  | 0 | 28 | 0 | 5  |
| Q8VHF2 | Mucin and cadherin-like protein precursor (Mu-protocadherin) - Mus musculus (Mouse)                                                                                          | 88552  | 0 | 28 | 0 | 7  |
| Q9EQM6 | Protein DGCR8 (DiGeorge syndrome critical region 8 homolog) (Gy1) - Mus musculus (Mouse)                                                                                     | 87122  | 0 | 28 | 0 | 29 |
| P15806 | Transcription factor E2-alpha (Immunoglobulin enhancer-binding factor E12/E47) (Transcription factor 3) (TCF-3) (Transcription factor A1) - Mus musculus (Mouse)             | 67773  | 0 | 28 | 0 | 9  |
| Q69ZQ2 | Pre-mRNA-splicing factor ISY1 homolog - Mus musculus (Mouse)                                                                                                                 | 33026  | 0 | 28 | 0 | 8  |
| Q35490 | Betaine--homocysteine S-methyltransferase 1 (EC 2.1.1.5) - Mus musculus (Mouse)                                                                                              | 45448  | 0 | 28 | 0 | 5  |
| Q8BIK4 | Dedicator of cytokinesis protein 9 (Cdc42 guanine nucleotide exchange factor zizimin-1) - Mus musculus (Mouse)                                                               | 237613 | 0 | 28 | 0 | 25 |
| Q8K0V4 | CCR4-NOT transcription complex subunit 3 (CCR4-associated factor 3) - Mus musculus (Mouse)                                                                                   | 82124  | 0 | 27 | 0 | 4  |
| P27612 | Phospholipase A-2-activating protein (PLAP) - Mus musculus (Mouse)                                                                                                           | 88605  | 0 | 27 | 0 | 6  |

|        |                                                                                                                                                                                       |        |   |    |   |    |
|--------|---------------------------------------------------------------------------------------------------------------------------------------------------------------------------------------|--------|---|----|---|----|
| P28658 | Ataxin-10 (Spinocerebellar ataxia type 10 protein homolog) (Brain protein E46) - Mus musculus (Mouse)                                                                                 | 54300  | 0 | 27 | 0 | 16 |
| Q9DAW9 | Calponin-3 (Calponin, acidic isoform) - Mus musculus (Mouse)                                                                                                                          | 36577  | 0 | 27 | 0 | 13 |
| Q8VCB3 | Glycogen [starch] synthase, liver (EC 2.4.1.11) - Mus musculus (Mouse)                                                                                                                | 81575  | 0 | 27 | 0 | 7  |
| Q60598 | Src substrate cortactin - Mus musculus (Mouse)                                                                                                                                        | 61394  | 0 | 27 | 0 | 14 |
| P56960 | Exosome component 10 (Polymyositis/scleroderma autoantigen 2 homolog) (Autoantigen PM/Scl 2 homolog) - Mus musculus (Mouse)                                                           | 101593 | 0 | 27 | 0 | 12 |
| Q91ZD4 | Vang-like protein 2 (Van Gogh-like protein 2) (Loop-tail-associated protein) (Loop-tail protein 1) - Mus musculus (Mouse)                                                             | 59961  | 0 | 27 | 0 | 31 |
| Q8C2S5 | F-box/LRR-repeat protein 5 (F-box and leucine-rich repeat protein 5) - Mus musculus (Mouse)                                                                                           | 79326  | 0 | 27 | 0 | 10 |
| Q61823 | Programmed cell death protein 4 (Topoisomerase-inhibitor suppressed protein) (Protein MA-3) - Mus musculus (Mouse)                                                                    | 52069  | 0 | 27 | 0 | 10 |
| Q8R1U1 | Conserved oligomeric Golgi complex component 4 - Mus musculus (Mouse)                                                                                                                 | 89574  | 0 | 27 | 0 | 16 |
| P35438 | Glutamate [NMDA] receptor subunit zeta 1 precursor (N-methyl-D-aspartate receptor subunit NR1) - Mus musculus (Mouse)                                                                 | 106098 | 0 | 27 | 0 | 15 |
| Q9WVL3 | Solute carrier family 12 member 7 (Electroneutral potassium-chloride cotransporter 4) (K-Cl cotransporter 4) - Mus musculus (Mouse)                                                   | 120715 | 0 | 27 | 0 | 24 |
| Q9D0D5 | Transcription initiation factor IIE subunit alpha (TFIIE-alpha) (General transcription factor IIE subunit 1) (General transcription factor IIE 56 kDa subunit) - Mus musculus (Mouse) | 50018  | 0 | 27 | 0 | 8  |

|        |                                                                                                                                                                                                              |        |   |    |   |    |
|--------|--------------------------------------------------------------------------------------------------------------------------------------------------------------------------------------------------------------|--------|---|----|---|----|
| Q9DAA3 | Uncharacterized protein C4orf36 homolog - Mus musculus (Mouse)                                                                                                                                               | 13771  | 0 | 26 | 0 | 11 |
| Q9EQ06 | Dehydrogenase/reductase SDR family member 8 precursor (EC 1.1.1.-) (17-beta-hydroxysteroid dehydrogenase 11) (17-beta-HSD 11) (17-beta-HSD XI) (17betaHSDXI) (17bHSD11) (17betaHSD11) - Mus musculus (Mouse) | 33145  | 0 | 26 | 0 | 6  |
| P97384 | Annexin A11 (Annexin XI) (Calcyclin-associated annexin 50) (CAP-50) - Mus musculus (Mouse)                                                                                                                   | 54419  | 0 | 26 | 0 | 9  |
| O35639 | Annexin A3 (Annexin III) (Lipocortin III) (Placental anticoagulant protein III) (PAP-III) (35-alpha calcimedlin) - Mus musculus (Mouse)                                                                      | 36520  | 0 | 26 | 0 | 5  |
| P10107 | Annexin A1 (Annexin I) (Lipocortin I) (Calpactin II) (Chromobindin-9) (p35) (Phospholipase A2 inhibitory protein) - Mus musculus (Mouse)                                                                     | 38995  | 0 | 26 | 0 | 6  |
| Q9JHJ7 | Testisin precursor (EC 3.4.21.-) (Serine protease 21) (Trypsin 4) - Mus musculus (Mouse)                                                                                                                     | 36722  | 0 | 26 | 0 | 2  |
| Q91X20 | Set1/Ash2 histone methyltransferase complex subunit ASH2 (ASH2-like protein) - Mus musculus (Mouse)                                                                                                          | 68777  | 0 | 26 | 0 | 6  |
| Q9ER58 | Testican-2 precursor (SPARC/osteonectin, CWCV, and Kazal-like domains proteoglycan 2) - Mus musculus (Mouse)                                                                                                 | 48201  | 0 | 26 | 0 | 5  |
| Q80Y50 | Calmodulin-binding transcription activator 2 - Mus musculus (Mouse)                                                                                                                                          | 133352 | 0 | 26 | 0 | 10 |
| P17408 | Oncogene tlm - Mus musculus (Mouse)                                                                                                                                                                          | 36199  | 0 | 26 | 0 | 5  |
| Q61410 | cGMP-dependent protein kinase 2 (EC 2.7.11.12) (CGK 2) (cGKII) (Type II cGMP-dependent protein kinase) - Mus musculus (Mouse)                                                                                | 87714  | 0 | 26 | 0 | 11 |
| Q9DBY5 | Chromobox protein homolog 6 - Mus musculus (Mouse)                                                                                                                                                           | 44661  | 0 | 26 | 0 | 5  |

|        |                                                                                                                                                                                                                         |        |   |    |   |    |
|--------|-------------------------------------------------------------------------------------------------------------------------------------------------------------------------------------------------------------------------|--------|---|----|---|----|
| Q5XPI3 | E3 ubiquitin-protein ligase RNF123 (EC 6.3.2.-) (RING finger protein 123) (Kip1 ubiquitination-promoting complex protein 1) - Mus musculus (Mouse)                                                                      | 150040 | 0 | 26 | 0 | 7  |
| Q8BK67 | Protein RCC2 - Mus musculus (Mouse)                                                                                                                                                                                     | 56689  | 0 | 26 | 0 | 2  |
| P36898 | Bone morphogenetic protein receptor type IB precursor (EC 2.7.11.30) (Serine/threonine-protein kinase receptor R6) (SKR6) (Activin receptor-like kinase 6) (ALK-6) - Mus musculus (Mouse)                               | 57991  | 0 | 26 | 0 | 10 |
| Q8K2Y7 | 39S ribosomal protein L47, mitochondrial precursor (L47mt) (MRP-L47) - Mus musculus (Mouse)                                                                                                                             | 29992  | 0 | 26 | 0 | 8  |
| P14231 | Sodium/potassium-transporting ATPase subunit beta-2 (Sodium/potassium-dependent ATPase beta-2 subunit) (Glial cell adhesion molecule) (AMOG) - Mus musculus (Mouse)                                                     | 33722  | 0 | 26 | 0 | 3  |
| Q91WW3 | Mas-related G-protein coupled receptor member A3 - Mus musculus (Mouse)                                                                                                                                                 | 35201  | 0 | 26 | 0 | 3  |
| Q8BHZ4 | Zinc finger protein 592 (Zfp-592) - Mus musculus (Mouse)                                                                                                                                                                | 140127 | 0 | 26 | 0 | 24 |
| Q7TM95 | Tigger transposable element-derived protein 3 - Mus musculus (Mouse)                                                                                                                                                    | 52931  | 0 | 26 | 0 | 5  |
| Q62468 | Villin-1 - Mus musculus (Mouse)                                                                                                                                                                                         | 93256  | 0 | 26 | 0 | 22 |
| Q64356 | Seminal vesicle secretory protein 6 precursor (Seminal vesicle secretory protein VI) (SVS VI) (Seminal vesicle protein 6) (SVSP99) - Mus musculus (Mouse)                                                               | 11475  | 0 | 26 | 0 | 6  |
| Q80TJ7 | PHD finger protein 8 - Mus musculus (Mouse)                                                                                                                                                                             | 114508 | 0 | 25 | 0 | 4  |
| Q9CPP6 | NADH dehydrogenase [ubiquinone] 1 alpha subcomplex subunit 5 (EC 1.6.5.3) (EC 1.6.99.3) (NADH-ubiquinone oxidoreductase 13 kDa-B subunit) (Complex I-13kD-B) (CI-13kD-B) (Complex I subunit B13) - Mus musculus (Mouse) | 13408  | 0 | 25 | 0 | 4  |



|        |                                                                                                                                                                                                                                                           |        |   |    |   |    |
|--------|-----------------------------------------------------------------------------------------------------------------------------------------------------------------------------------------------------------------------------------------------------------|--------|---|----|---|----|
| Q9CXR4 | Phosphatidylinositol N-acetylglucosaminyltransferase subunit C (EC 2.4.1.198) (Phosphatidylinositol-glycan biosynthesis class C protein) (PIG-C) - Mus musculus (Mouse)                                                                                   | 34044  | 0 | 25 | 0 | 1  |
| O08532 | Dihydropyridine-sensitive L-type calcium channel subunits alpha-2/delta precursor [Contains: L-type calcium channel subunit alpha-2; L-type calcium channel subunit delta] - Mus musculus (Mouse)                                                         | 125692 | 0 | 25 | 0 | 26 |
| Q9R0X4 | Acyl-coenzyme A thioesterase 9, mitochondrial precursor (EC 3.1.2.-) (Acyl-CoA thioesterase 9) (Acyl-CoA thioester hydrolase 9) (Acyl coenzyme A thioester hydrolase 2) (48 kDa acyl-CoA thioester hydrolase) (p48) (Mt-ACT48) (Protein U8) (MTE-2) - Mus | 50813  | 0 | 25 | 0 | 6  |
| P11404 | Fatty acid-binding protein, heart (H-FABP) (Heart-type fatty acid-binding protein) (Mammary-derived growth inhibitor) (MDGI) - Mus musculus (Mouse)                                                                                                       | 14810  | 0 | 25 | 0 | 3  |
| Q3TPE9 | Ankyrin repeat and MYND domain-containing protein 2 - Mus musculus (Mouse)                                                                                                                                                                                | 49712  | 0 | 25 | 0 | 11 |
| P14685 | 26S proteasome non-ATPase regulatory subunit 3 (26S proteasome regulatory subunit S3) (Proteasome subunit p58) (Transplantation antigen P91A) (Tum-P91A antigen) - Mus musculus (Mouse)                                                                   | 60775  | 0 | 25 | 0 | 12 |
| Q715T0 | Thioredoxin domain-containing protein 3 (Spermatid-specific thioredoxin-2) (Sptrx-2) - Mus musculus (Mouse)                                                                                                                                               | 67271  | 0 | 25 | 0 | 7  |
| Q9D718 | Protein FAM83D - Mus musculus (Mouse)                                                                                                                                                                                                                     | 64740  | 0 | 25 | 0 | 3  |
| Q91YR7 | Pre-mRNA-processing factor 6 (PRP6 homolog) (U5 snRNP-associated 102 kDa protein) (U5-102 kDa protein) - Mus musculus (Mouse)                                                                                                                             | 107453 | 0 | 25 | 0 | 22 |

|        |                                                                                                                                                                                                                                                            |        |   |    |   |    |
|--------|------------------------------------------------------------------------------------------------------------------------------------------------------------------------------------------------------------------------------------------------------------|--------|---|----|---|----|
| Q922D8 | C-1-tetrahydrofolate synthase, cytoplasmic (C1-THF synthase) [Includes: Methylenetetrahydrofolate dehydrogenase (EC 1.5.1.5); Methenyltetrahydrofolate cyclohydrolase (EC 3.5.4.9); Formyltetrahydrofolate synthetase (EC 6.3.4.3)] - Mus musculus (Mouse) | 101876 | 0 | 25 | 0 | 16 |
| Q80WB0 | Uncharacterized protein C20orf195 homolog - Mus musculus (Mouse)                                                                                                                                                                                           | 37560  | 0 | 25 | 0 | 6  |
| Q8BWW9 | Serine/threonine-protein kinase N2 (EC 2.7.11.13) (Protein kinase C-like 2) (Protein-kinase C-related kinase 2) - Mus musculus (Mouse)                                                                                                                     | 112415 | 0 | 25 | 0 | 9  |
| P08071 | Lactotransferrin precursor (EC 3.4.21.-) (Lactoferrin) - Mus musculus (Mouse)                                                                                                                                                                              | 79698  | 0 | 25 | 0 | 16 |
| O09167 | 60S ribosomal protein L21 - Mus musculus (Mouse)                                                                                                                                                                                                           | 18607  | 0 | 25 | 0 | 14 |
| Q5FW52 | Uncharacterized protein C6orf142 homolog - Mus musculus (Mouse)                                                                                                                                                                                            | 29505  | 0 | 25 | 0 | 2  |
| Q99K90 | Mitogen-activated protein kinase kinase kinase 7-interacting protein 2 (TAK1-binding protein 2) (TAB2) - Mus musculus (Mouse)                                                                                                                              | 76908  | 0 | 25 | 0 | 5  |
| Q9D9W0 | Uncharacterized protein C21orf56 homolog - Mus musculus (Mouse)                                                                                                                                                                                            | 38596  | 0 | 24 | 0 | 2  |
| O08756 | 3-hydroxyacyl-CoA dehydrogenase type-2 (EC 1.1.1.35) (3-hydroxyacyl-CoA dehydrogenase type II) (Type II HADH) (3-hydroxy-2-methylbutyryl-CoA dehydrogenase) (EC 1.1.1.178) (Endoplasmic reticulum-associated amyloid beta-peptide-binding protein) - Mus   | 27516  | 0 | 24 | 0 | 7  |

|        |                                                                                                                                                                                                                                                           |        |   |    |   |    |
|--------|-----------------------------------------------------------------------------------------------------------------------------------------------------------------------------------------------------------------------------------------------------------|--------|---|----|---|----|
| Q9CW03 | Structural maintenance of chromosomes protein 3 (Chondroitin sulfate proteoglycan 6) (Chromosome segregation protein SmcD) (Bamacan) (Basement membrane-associated chondroitin proteoglycan) (Mad member-interacting protein 1) - Mus musculus (Mouse)    | 141867 | 0 | 24 | 0 | 33 |
| Q8K1B9 | Putative polypeptide N-acetylgalactosaminyltransferase-like protein 4 (EC 2.4.1.41) (Protein-UDP acetylgalactosaminyltransferase-like protein 4) (UDP-GalNAc:polypeptide N-acetylgalactosaminyltransferase-like protein 4) (Polypeptide GalNAc transferas | 71906  | 0 | 24 | 0 | 5  |
| Q9CXG3 | Peptidyl-prolyl cis-trans isomerase-like 4 (EC 5.2.1.8) (PPIase) (Rotamase) (Cyclophilin-like protein PPIL4) - Mus musculus (Mouse)                                                                                                                       | 57708  | 0 | 24 | 0 | 2  |
| O35655 | Serine/threonine-protein phosphatase with EF-hands 1 (EC 3.1.3.16) (PPEF-1) (Protein phosphatase with EF calcium-binding domain) (PPEF) (DRES10) (Fragment) - Mus musculus (Mouse)                                                                        | 31940  | 0 | 24 | 0 | 2  |
| Q921T2 | Torsin-1A-interacting protein 1 (Lamina-associated polypeptide 1B) - Mus musculus (Mouse)                                                                                                                                                                 | 58608  | 0 | 24 | 0 | 6  |
| Q9Z2L6 | Multiple inositol polyphosphate phosphatase 1 precursor (EC 3.1.3.62) (Inositol (1,3,4,5)-tetrakisphosphate 3-phosphatase) (Ins(1,3,4,5)P(4) 3-phosphatase) - Mus musculus (Mouse)                                                                        | 55156  | 0 | 24 | 0 | 5  |
| Q58A65 | C-jun-amino-terminal kinase-interacting protein 4 (JNK-interacting protein 4) (JIP-4) (JNK-associated leucine-zipper protein) (JLP) (Sperm-associated antigen 9) (Mitogen-activated protein kinase 8-interacting protein 4) (JNK/SAPK-associated protein  | 146984 | 0 | 24 | 0 | 20 |

|        |                                                                                                                                                                                     |       |   |    |   |    |
|--------|-------------------------------------------------------------------------------------------------------------------------------------------------------------------------------------|-------|---|----|---|----|
| O88643 | Serine/threonine-protein kinase<br>PAK 1 (EC 2.7.11.1) (p21-<br>activated kinase 1) (PAK-1)<br>(P65-PAK) (Alpha-PAK)<br>(CDC42/RAC effector kinase<br>PAK-A) - Mus musculus (Mouse) | 61041 | 0 | 24 | 0 | 17 |
| Q5U3K5 | Putative GTP-binding protein<br>Parf - Mus musculus (Mouse)                                                                                                                         | 80067 | 0 | 24 | 0 | 11 |
| P18581 | Low-affinity cationic amino acid<br>transporter 2 (CAT-2) (CAT2)<br>(TEA protein) (T-cell early<br>activation protein) (20.5) - Mus<br>musculus (Mouse)                             | 72675 | 0 | 24 | 0 | 10 |
| Q8BP78 | Protein FRA10AC1 homolog -<br>Mus musculus (Mouse)                                                                                                                                  | 37637 | 0 | 24 | 0 | 7  |
| Q99M87 | DnaJ homolog subfamily A<br>member 3, mitochondrial<br>precursor (Tumorous imaginal<br>discs protein Tid56 homolog)<br>(DnaJ protein Tid-1) (mTid-1) -<br>Mus musculus (Mouse)      | 53095 | 0 | 24 | 0 | 8  |
| Q566J8 | Uncharacterized aarF domain-<br>containing protein kinase 4 (EC<br>2.7.-.-) - Mus musculus (Mouse)                                                                                  | 59936 | 0 | 24 | 0 | 14 |
| P56974 | Pro-neuregulin-2, membrane-<br>bound isoform precursor (Pro-<br>NRG2) [Contains: Neuregulin-2<br>(NRG-2) (Divergent of<br>neuregulin 1) (DON-1)] - Mus<br>musculus (Mouse)          | 83530 | 0 | 24 | 0 | 4  |
| Q7TPD6 | Ribonucleoprotein PTB-binding<br>2 (Protein raver-2) - Mus<br>musculus (Mouse)                                                                                                      | 72556 | 0 | 24 | 0 | 3  |
| Q9QZM3 | Cardiotrophin-like cytokine<br>factor 1 precursor (B cell-<br>stimulating factor 3) (BSF-3)<br>(Novel neurotrophin-1) (NNT-1) -<br>Mus musculus (Mouse)                             | 25473 | 0 | 24 | 0 | 2  |
| Q99MN1 | Lysyl-tRNA synthetase (EC<br>6.1.1.6) (Lysine--tRNA ligase)<br>(LysRS) - Mus musculus<br>(Mouse)                                                                                    | 68253 | 0 | 24 | 0 | 15 |
| Q9CPX7 | 28S ribosomal protein S16,<br>mitochondrial precursor (S16mt)<br>(MRP-S16) - Mus musculus<br>(Mouse)                                                                                | 15410 | 0 | 24 | 0 | 3  |
| Q6PB75 | DNA polymerase sigma (EC<br>2.7.7.7) - Mus musculus<br>(Mouse)                                                                                                                      | 60301 | 0 | 24 | 0 | 4  |

|        |                                                                                                                                                                                                     |        |   |    |   |    |
|--------|-----------------------------------------------------------------------------------------------------------------------------------------------------------------------------------------------------|--------|---|----|---|----|
| Q8R183 | T-cell immunoglobulin and mucin domain-containing protein 2 precursor (TIMD-2) (T cell membrane protein 2) (TIM-2) - Mus musculus (Mouse)                                                           | 33882  | 0 | 24 | 0 | 1  |
| Q80TT8 | p53-associated parkin-like cytoplasmic protein - Mus musculus (Mouse)                                                                                                                               | 212904 | 0 | 24 | 0 | 10 |
| P29037 | TATA-box-binding protein (TATA box factor) (TATA-binding factor) (TATA sequence-binding protein) (Transcription initiation factor TFIID TBP subunit) - Mus musculus (Mouse)                         | 34858  | 0 | 24 | 0 | 4  |
| Q91V80 | Apolipoprotein F precursor (Apo-F) (Leukemia virus-inactivating factor) (LVIF) - Mus musculus (Mouse)                                                                                               | 34680  | 0 | 24 | 0 | 12 |
| Q8CJ53 | Cdc42-interacting protein 4 (Thyroid receptor-interacting protein 10) (TRIP-10) - Mus musculus (Mouse)                                                                                              | 68675  | 0 | 24 | 0 | 11 |
| Q9Z2D8 | Methyl-CpG-binding domain protein 3 (Methyl-CpG-binding protein MBD3) - Mus musculus (Mouse)                                                                                                        | 32376  | 0 | 24 | 0 | 7  |
| Q6XQH0 | Galactose 3-O-sulfotransferase 2 (EC 2.8.2.-) (Gal3ST-2) (Galbeta1-3GalNAc 3~-sulfotransferase 2) (Beta-galactose-3-O-sulfotransferase 2) - Mus musculus (Mouse)                                    | 47107  | 0 | 24 | 0 | 5  |
| Q9DCD0 | 6-phosphogluconate dehydrogenase, decarboxylating (EC 1.1.1.44) - Mus musculus (Mouse)                                                                                                              | 53726  | 0 | 24 | 0 | 11 |
| Q8C7V3 | U3 small nucleolar RNA-associated protein 15 homolog (Src-associated protein SAW) - Mus musculus (Mouse)                                                                                            | 59737  | 0 | 24 | 0 | 6  |
| Q8BR92 | Paralemmin-2 - Mus musculus (Mouse)                                                                                                                                                                 | 42297  | 0 | 24 | 0 | 7  |
| P63328 | Serine/threonine-protein phosphatase 2B catalytic subunit alpha isoform (EC 3.1.3.16) (Calmodulin-dependent calcineurin A subunit alpha isoform) (CAM-PRP catalytic subunit) - Mus musculus (Mouse) | 59291  | 0 | 24 | 0 | 8  |

|        |                                                                                                                                                                                                                                        |        |   |    |   |    |
|--------|----------------------------------------------------------------------------------------------------------------------------------------------------------------------------------------------------------------------------------------|--------|---|----|---|----|
| P48453 | Serine/threonine-protein phosphatase 2B catalytic subunit beta isoform (EC 3.1.3.16) (Calmodulin-dependent calcineurin A subunit beta isoform) (CAM-PRP catalytic subunit) - Mus musculus (Mouse)                                      | 59820  | 0 | 24 | 0 | 8  |
| Q9WVC5 | Short transient receptor potential channel 7 (TrpC7) (mTRP7) - Mus musculus (Mouse)                                                                                                                                                    | 100152 | 0 | 24 | 0 | 4  |
| Q9QZS8 | SH2 domain-containing protein 3C (SH2 domain-containing Eph receptor-binding protein 1) (Cas/HEF1-associated signal transducer) - Mus musculus (Mouse)                                                                                 | 94891  | 0 | 24 | 0 | 12 |
| Q91WQ3 | Tyrosyl-tRNA synthetase, cytoplasmic (EC 6.1.1.1) (Tyrosyl--tRNA ligase) (TyrRS) - Mus musculus (Mouse)                                                                                                                                | 59410  | 0 | 24 | 0 | 10 |
| O54904 | Beta-1,3-galactosyltransferase 1 (EC 2.4.1.-) (Beta-1,3-GalTase 1) (Beta3GalT1) (UDP-galactose:beta-N-acetylglucosamine-beta-1,3-galactosyltransferase 1) (UDP-Gal:betaGlcNAc beta 1,3-galactosyltransferase-I) - Mus musculus (Mouse) | 38425  | 0 | 23 | 0 | 3  |
| O55017 | Voltage-dependent N-type calcium channel subunit alpha-1B (Voltage-gated calcium channel subunit alpha Cav2.2) (Calcium channel, L type, alpha-1 polypeptide isoform 5) (Brain calcium channel III) (BIII) - Mus musculus (Mouse)      | 263538 | 0 | 23 | 0 | 19 |
| Q64331 | Myosin-VI - Mus musculus (Mouse)                                                                                                                                                                                                       | 147686 | 0 | 23 | 0 | 22 |
| Q9D0F9 | Phosphoglucomutase-1 (EC 5.4.2.2) (Glucose phosphomutase 1) (PGM 1) - Mus musculus (Mouse)                                                                                                                                             | 61764  | 0 | 23 | 0 | 2  |
| Q8R5A6 | TBC1 domain family member 22A - Mus musculus (Mouse)                                                                                                                                                                                   | 59610  | 0 | 23 | 0 | 7  |

|        |                                                                                                                                                                                                      |        |   |    |   |     |
|--------|------------------------------------------------------------------------------------------------------------------------------------------------------------------------------------------------------|--------|---|----|---|-----|
| Q6VNS1 | NT-3 growth factor receptor precursor (EC 2.7.10.1) (Neurotrophic tyrosine kinase receptor type 3) (TrkC tyrosine kinase) (GP145-TrkC) (Trk-C) - Mus musculus (Mouse)                                | 93955  | 0 | 23 | 0 | 12  |
| Q8K4Z5 | Splicing factor 3 subunit 1 (SF3a120) - Mus musculus (Mouse)                                                                                                                                         | 88546  | 0 | 23 | 0 | 104 |
| P51655 | Glypican-4 precursor (K-glypican) - Mus musculus (Mouse)                                                                                                                                             | 63629  | 0 | 23 | 0 | 5   |
| P70425 | GTP-binding protein Rit2 (Ras-like protein expressed in neurons) (Ras-like without CAAX protein 2) - Mus musculus (Mouse)                                                                            | 25015  | 0 | 23 | 0 | 3   |
| Q8VC48 | Peroxisome assembly protein 12 (Peroxin-12) - Mus musculus (Mouse)                                                                                                                                   | 40892  | 0 | 23 | 0 | 2   |
| Q61180 | Amiloride-sensitive sodium channel subunit alpha (Epithelial Na(+) channel subunit alpha) (Alpha ENaC) (Nonvoltage-gated sodium channel 1 subunit alpha) (SCNEA) (Alpha NaCH) - Mus musculus (Mouse) | 80097  | 0 | 23 | 0 | 2   |
| P43432 | Interleukin-12 subunit beta precursor (IL-12B) (IL-12 subunit p40) (Cytotoxic lymphocyte maturation factor 40 kDa subunit) (CLMF p40) - Mus musculus (Mouse)                                         | 39009  | 0 | 23 | 0 | 5   |
| O54956 | DNA polymerase epsilon subunit 2 (EC 2.7.7.7) (DNA polymerase II subunit 2) (DNA polymerase epsilon subunit B) - Mus musculus (Mouse)                                                                | 60033  | 0 | 23 | 0 | 4   |
| P11590 | Major urinary protein 4 precursor (MUP 4) - Mus musculus (Mouse)                                                                                                                                     | 20814  | 0 | 23 | 0 | 3   |
| O88879 | Apoptotic protease-activating factor 1 (Apaf-1) - Mus musculus (Mouse)                                                                                                                               | 143137 | 0 | 23 | 0 | 11  |
| Q66JV4 | RNA-binding protein 12B-B (RNA-binding motif protein 12B-B) - Mus musculus (Mouse)                                                                                                                   | 97118  | 0 | 23 | 0 | 12  |
| Q80YR9 | RNA-binding protein 12B-A (RNA-binding motif protein 12B-A) - Mus musculus (Mouse)                                                                                                                   | 97220  | 0 | 23 | 0 | 12  |

|        |                                                                                                                                                                                                                                                           |        |   |    |   |    |
|--------|-----------------------------------------------------------------------------------------------------------------------------------------------------------------------------------------------------------------------------------------------------------|--------|---|----|---|----|
| Q8R3E3 | WD repeat domain phosphoinositide-interacting protein 1 (WIPI-1) (WD40 repeat protein interacting with phosphoinositides of 49 kDa) (WIPI 49 kDa) - Mus musculus (Mouse)                                                                                  | 49354  | 0 | 23 | 0 | 3  |
| P47750 | Thyrotropin receptor precursor (TSH-R) (Thyroid-stimulating hormone receptor) - Mus musculus (Mouse)                                                                                                                                                      | 87782  | 0 | 23 | 0 | 4  |
| Q61048 | WW domain-binding protein 4 (WBP-4) (Formin-binding protein 21) - Mus musculus (Mouse)                                                                                                                                                                    | 42395  | 0 | 23 | 0 | 2  |
| Q80W47 | WD repeat domain phosphoinositide-interacting protein 2 (WIPI-2) - Mus musculus (Mouse)                                                                                                                                                                   | 49244  | 0 | 23 | 0 | 3  |
| Q921W0 | Charged multivesicular body protein 1a (Chromatin-modifying protein 1a) (CHMP1a) - Mus musculus (Mouse)                                                                                                                                                   | 21651  | 0 | 23 | 0 | 8  |
| Q6PD03 | Serine/threonine-protein phosphatase 2A 56 kDa regulatory subunit alpha isoform (PP2A, B subunit, B~ alpha isoform) (PP2A, B subunit, B56 alpha isoform) (PP2A, B subunit, PR61 alpha isoform) (PP2A, B subunit, R5 alpha isoform) (PR61alpha) - Mus musc | 56710  | 0 | 23 | 0 | 10 |
| Q9DC04 | Regulator of G-protein signaling 3 (RGS3) (C2PA) - Mus musculus (Mouse)                                                                                                                                                                                   | 107579 | 0 | 23 | 0 | 7  |
| Q64387 | Nociceptin precursor (N23K/N27K) [Contains: Neuropeptide 1; Nociceptin (Orphanin FQ) (PPNOC); Neuropeptide 2] - Mus musculus (Mouse)                                                                                                                      | 21270  | 0 | 23 | 0 | 3  |
| Q9EPS3 | D-glucuronyl C5-epimerase (EC 5.1.3.-) (Heparin/heparan sulfate:glucuronic acid C5 epimerase) - Mus musculus (Mouse)                                                                                                                                      | 70397  | 0 | 23 | 0 | 15 |
| Q62240 | Jumonji/ARID domain-containing protein 1D (Protein SmcY) (Histocompatibility Y antigen) (H-Y) - Mus musculus (Mouse)                                                                                                                                      | 179812 | 0 | 23 | 0 | 17 |



|        |                                                                                                                                                                                                           |        |   |    |   |    |
|--------|-----------------------------------------------------------------------------------------------------------------------------------------------------------------------------------------------------------|--------|---|----|---|----|
| Q8C398 | Phosphatidylinositol-glycan biosynthesis class W protein (EC 2.3.-.-) (PIG-W) - Mus musculus (Mouse)                                                                                                      | 57545  | 0 | 23 | 0 | 2  |
| Q8R516 | E3 ubiquitin-protein ligase MIB2 (EC 6.3.2.-) (Mind bomb homolog 2) (Mind bomb-2) (Skeletrophin) (Dystrophin-like protein) (Dyslike) - Mus musculus (Mouse)                                               | 107719 | 0 | 23 | 0 | 9  |
| Q8K2I2 | Coiled-coil alpha-helical rod protein 1 (Alpha helical coiled-coil rod protein) - Mus musculus (Mouse)                                                                                                    | 87364  | 0 | 23 | 0 | 14 |
| Q8C3I8 | Brain protein 16 - Mus musculus (Mouse)                                                                                                                                                                   | 43288  | 0 | 23 | 0 | 11 |
| Q8CG46 | Structural maintenance of chromosomes protein 5 (mSMC5) - Mus musculus (Mouse)                                                                                                                            | 129930 | 0 | 23 | 0 | 13 |
| Q9D439 | Coiled-coil domain-containing protein 11 - Mus musculus (Mouse)                                                                                                                                           | 62101  | 0 | 23 | 0 | 7  |
| Q8CFJ9 | WD repeat protein 24 - Mus musculus (Mouse)                                                                                                                                                               | 89838  | 0 | 23 | 0 | 5  |
| Q3U319 | Ubiquitin-protein ligase BRE1B (EC 6.3.2.-) (BRE1-B) (RING finger protein 40) - Mus musculus (Mouse)                                                                                                      | 114809 | 0 | 23 | 0 | 11 |
| Q8BX94 | Oxysterol-binding protein-related protein 2 (OSBP-related protein 2) (ORP-2) - Mus musculus (Mouse)                                                                                                       | 55806  | 0 | 23 | 0 | 7  |
| Q9Z2Z9 | Glucosamine--fructose-6-phosphate aminotransferase [isomerizing] 2 (EC 2.6.1.16) (Hexosephosphate aminotransferase 2) (D-fructose-6-phosphate amidotransferase 2) (GFAT 2) (GFAT2) - Mus musculus (Mouse) | 77758  | 0 | 23 | 0 | 9  |
| Q9CQR2 | 40S ribosomal protein S21 - Mus musculus (Mouse)                                                                                                                                                          | 9250   | 0 | 23 | 0 | 8  |
| O54692 | Centromere/kinetochore protein zw10 homolog - Mus musculus (Mouse)                                                                                                                                        | 89147  | 0 | 22 | 0 | 4  |
| Q9D0B8 | RIB43A-like with coiled-coils protein 1 - Mus musculus (Mouse)                                                                                                                                            | 45106  | 0 | 22 | 0 | 16 |

|        |                                                                                                                                                                                                         |        |   |    |   |    |
|--------|---------------------------------------------------------------------------------------------------------------------------------------------------------------------------------------------------------|--------|---|----|---|----|
| Q811B1 | Xylosyltransferase 1 (EC 2.4.2.26) (Xylosyltransferase I) (Peptide O-xylosyltransferase 1) - Mus musculus (Mouse)                                                                                       | 108086 | 0 | 22 | 0 | 10 |
| Q9Z223 | Molybdenum cofactor synthesis protein 2 large subunit (Molybdopterin synthase large subunit) (MPT synthase large subunit) (MOCS2B) - Mus musculus (Mouse)                                               | 21195  | 0 | 22 | 0 | 1  |
| Q8VC19 | 5-aminolevulinate synthase, nonspecific, mitochondrial precursor (EC 2.3.1.37) (5-aminolevulinic acid synthase) (Delta-aminolevulinate synthase) (Delta-ALA synthetase) (ALAS-H) - Mus musculus (Mouse) | 71827  | 0 | 22 | 0 | 7  |
| Q8C147 | Dedicator of cytokinesis protein 8 - Mus musculus (Mouse)                                                                                                                                               | 119855 | 0 | 22 | 0 | 13 |
| Q9JI33 | Netrin-4 precursor (Beta-netrin) - Mus musculus (Mouse)                                                                                                                                                 | 72587  | 0 | 22 | 0 | 7  |
| P55066 | Neurocan core protein precursor (Chondroitin sulfate proteoglycan 3) - Mus musculus (Mouse)                                                                                                             | 139053 | 0 | 22 | 0 | 9  |
| Q99K70 | Ras-related GTP-binding protein C (Rag C) (GTPase-interacting protein 2) (TIB929) - Mus musculus (Mouse)                                                                                                | 44492  | 0 | 22 | 0 | 9  |
| P47968 | Ribose-5-phosphate isomerase (EC 5.3.1.6) (Phosphoriboisomerase) - Mus musculus (Mouse)                                                                                                                 | 26098  | 0 | 22 | 0 | 7  |
| O88398 | Advillin (p92) (Actin-binding protein DOC6) - Mus musculus (Mouse)                                                                                                                                      | 92471  | 0 | 22 | 0 | 5  |
| P13864 | DNA (cytosine-5)-methyltransferase 1 (EC 2.1.1.37) (Dnmt1) (DNA methyltransferase Mmul) (DNA MTase Mmul) (MCMT) (M.Mmul) (Met-1) - Mus musculus (Mouse)                                                 | 185411 | 0 | 22 | 0 | 21 |
| O08747 | Netrin receptor UNC5C precursor (Unc-5 homolog C) (Unc-5 homolog 3) (Rostral cerebellar malformation protein) - Mus musculus (Mouse)                                                                    | 104879 | 0 | 22 | 0 | 16 |
| Q9JMJ2 | F-box/WD repeat protein 4 (F-box and WD-40 domain protein 4) (Hagoromo protein) - Mus musculus (Mouse)                                                                                                  | 46968  | 0 | 22 | 0 | 3  |

|        |                                                                                                                                                                         |        |   |    |   |    |
|--------|-------------------------------------------------------------------------------------------------------------------------------------------------------------------------|--------|---|----|---|----|
| Q9R0H0 | Acyl-coenzyme A oxidase 1, peroxisomal (EC 1.3.3.6) (Palmitoyl-CoA oxidase) (AOX) - Mus musculus (Mouse)                                                                | 74986  | 0 | 22 | 0 | 5  |
| Q7M723 | Taste receptor type 2 member 104 (T2R104) (mT2R45) - Mus musculus (Mouse)                                                                                               | 35231  | 0 | 22 | 0 | 2  |
| Q5SV06 | Spermatogenesis-associated protein 22 - Mus musculus (Mouse)                                                                                                            | 40480  | 0 | 22 | 0 | 5  |
| Q99NH2 | Partitioning-defective 3 homolog (PARD-3) (PAR-3) (Atypical PKC isotype-specific-interacting protein) (ASIP) (Ephrin-interacting protein) (PHIP) - Mus musculus (Mouse) | 149654 | 0 | 22 | 0 | 26 |
| Q8BH27 | Multiple epidermal growth factor-like domains 9 precursor (EGF-like domain-containing protein 5) (Multiple EGF-like domain protein 5) - Mus musculus (Mouse)            | 65185  | 0 | 22 | 0 | 3  |
| Q9DD03 | Ras-related protein Rab-13 - Mus musculus (Mouse)                                                                                                                       | 22927  | 0 | 22 | 0 | 4  |
| Q8BH69 | Selenide, water dikinase 1 (EC 2.7.9.3) (Selenophosphate synthetase 1) (Selenium donor protein 1) - Mus musculus (Mouse)                                                | 43392  | 0 | 22 | 0 | 3  |
| Q8K2F0 | Bromodomain-containing protein 3 (Bromodomain-containing FSH like protein FSRG2) - Mus musculus (Mouse)                                                                 | 79997  | 0 | 22 | 0 | 13 |
| O54984 | Arsenical pump-driving ATPase (EC 3.6.3.16) (Arsenite-translocating ATPase) (Arsenical resistance ATPase) (Arsenite-transporting ATPase) (ARSA) - Mus musculus (Mouse)  | 39254  | 0 | 22 | 0 | 4  |
| Q9CUS9 | Signal peptide peptidase-like 3 (EC 3.4.23.-) (SPP-like 3 protein) (Intramembrane protease 2) (IMP2) (Presenilin-like protein 4) - Mus musculus (Mouse)                 | 42791  | 0 | 22 | 0 | 2  |
| Q8BX57 | PX domain-containing protein kinase-like protein (Modulator of Na,K-ATPase) (MONaKA) - Mus musculus (Mouse)                                                             | 65760  | 0 | 22 | 0 | 12 |

|        |                                                                                                                                                                                                                                                                 |        |   |    |   |    |
|--------|-----------------------------------------------------------------------------------------------------------------------------------------------------------------------------------------------------------------------------------------------------------------|--------|---|----|---|----|
| Q5U431 | Probable G-protein coupled receptor 39 - Mus musculus (Mouse)                                                                                                                                                                                                   | 52183  | 0 | 22 | 0 | 16 |
| P70419 | Polypeptide N-acetylgalactosaminyltransferase 3 (EC 2.4.1.41) (Protein-UDP acetylgalactosaminyltransferase 3) (UDP-GalNAc:polypeptide N-acetylgalactosaminyltransferase 3) (Polypeptide GalNAc transferase 3) (GalNAc-T3) (pp-GaNTase 3) - Mus musculus (Mouse) | 73768  | 0 | 22 | 0 | 9  |
| Q8C7U7 | Polypeptide N-acetylgalactosaminyltransferase 6 (EC 2.4.1.41) (Protein-UDP acetylgalactosaminyltransferase 6) (UDP-GalNAc:polypeptide N-acetylgalactosaminyltransferase 6) (Polypeptide GalNAc transferase 6) (GalNAc-T6) (pp-GaNTase 6) - Mus musculus (       | 72347  | 0 | 22 | 0 | 2  |
| Q810C0 | SLIT and NTRK-like protein 2 precursor - Mus musculus (Mouse)                                                                                                                                                                                                   | 96517  | 0 | 22 | 0 | 10 |
| P11591 | Major urinary protein 5 precursor (MUP 5) - Mus musculus (Mouse)                                                                                                                                                                                                | 21278  | 0 | 22 | 0 | 2  |
| Q8BUG2 | Beta-Ala-His dipeptidase (EC 3.4.13.20) (Carnosine dipeptidase 1) (CNDP dipeptidase 1) - Mus musculus (Mouse)                                                                                                                                                   | 55226  | 0 | 22 | 0 | 12 |
| Q8CDC7 | Zinc finger and BTB domain-containing protein 9 - Mus musculus (Mouse)                                                                                                                                                                                          | 50303  | 0 | 22 | 0 | 5  |
| Q9ESC8 | AF4/FMR2 family member 4 - Mus musculus (Mouse)                                                                                                                                                                                                                 | 126962 | 0 | 22 | 0 | 15 |
| P70295 | Ancient ubiquitous protein 1 precursor - Mus musculus (Mouse)                                                                                                                                                                                                   | 46491  | 0 | 22 | 0 | 9  |
| Q62481 | Vacuolar protein sorting-associated protein 72 homolog (Transcription factor-like 1) (Protein YL-1) - Mus musculus (Mouse)                                                                                                                                      | 40987  | 0 | 22 | 0 | 3  |
| P01632 | Ig kappa chain V-I region S107A - Mus musculus (Mouse)                                                                                                                                                                                                          | 12823  | 0 | 22 | 0 | 2  |
| P21129 | P3 protein (Solute carrier family 10 member 3) - Mus musculus (Mouse)                                                                                                                                                                                           | 50564  | 0 | 22 | 0 | 2  |

|        |                                                                                                                                                                                                                                                       |        |   |    |   |    |
|--------|-------------------------------------------------------------------------------------------------------------------------------------------------------------------------------------------------------------------------------------------------------|--------|---|----|---|----|
| Q3V0F0 | Uncharacterized protein KIAA1666 - Mus musculus (Mouse)                                                                                                                                                                                               | 165339 | 0 | 22 | 0 | 9  |
| P17533 | Defensin-related sequence cryptdin peptide precursor (Cryptdin-related protein 1C) (CRS1C) - Mus musculus (Mouse)                                                                                                                                     | 13616  | 0 | 22 | 0 | 1  |
| Q5M956 | BTB/POZ domain-containing protein KCTD1 - Mus musculus (Mouse)                                                                                                                                                                                        | 29671  | 0 | 22 | 0 | 4  |
| Q61183 | Poly(A) polymerase alpha (EC 2.7.7.19) (PAP) (Polynucleotide adenylyltransferase) - Mus musculus (Mouse)                                                                                                                                              | 82714  | 0 | 21 | 0 | 8  |
| Q8K3J5 | Zinc finger protein 131 - Mus musculus (Mouse)                                                                                                                                                                                                        | 72003  | 0 | 21 | 0 | 11 |
| Q9WVP6 | Poly(A) polymerase beta (EC 2.7.7.19) (PAP beta) (Polynucleotide adenylyltransferase beta) (Testis specific poly(A) polymerase) - Mus musculus (Mouse)                                                                                                | 72495  | 0 | 21 | 0 | 5  |
| Q9D9F8 | Mirror-image polydactyly gene 1 protein homolog - Mus musculus (Mouse)                                                                                                                                                                                | 32073  | 0 | 21 | 0 | 5  |
| Q7TMY7 | Importin-8 (Imp8) (Ran-binding protein 8) (RanBP8) - Mus musculus (Mouse)                                                                                                                                                                             | 118001 | 0 | 21 | 0 | 9  |
| Q9JL04 | Formin-2 - Mus musculus (Mouse)                                                                                                                                                                                                                       | 167477 | 0 | 21 | 0 | 12 |
| Q9ER47 | Potassium voltage-gated channel subfamily H member 7 (Voltage-gated potassium channel subunit Kv11.3) (Ether-a-go-go-related gene potassium channel 3) (Ether-a-go-go-related protein 3) (Eag-related protein 3) - Mus musculus (Mouse)               | 136253 | 0 | 21 | 0 | 3  |
| Q99PI4 | Lipin-3 - Mus musculus (Mouse)                                                                                                                                                                                                                        | 94999  | 0 | 21 | 0 | 3  |
| Q01815 | Voltage-dependent L-type calcium channel subunit alpha-1C (Voltage-gated calcium channel subunit alpha Cav1.2) (Calcium channel, L type, alpha-1 polypeptide, isoform 1, cardiac muscle) (Mouse brain class C) (MBC) (MELC-CC) - Mus musculus (Mouse) | 242493 | 0 | 21 | 0 | 10 |

|        |                                                                                                                                                                                                                                                           |        |   |    |   |    |
|--------|-----------------------------------------------------------------------------------------------------------------------------------------------------------------------------------------------------------------------------------------------------------|--------|---|----|---|----|
| Q54790 | Transcription factor MafG (V-maf musculoaponeurotic fibrosarcoma oncogene homolog G) - Mus musculus                                                                                                                                                       | 17923  | 0 | 21 | 0 | 6  |
| Q8K1R3 | Polyribonucleotide nucleotidyltransferase 1, mitochondrial precursor (EC 2.7.7.8) (PNPase 1) (Polynucleotide phosphorylase-like protein) (PNPase old-35) (3~-5~ RNA exonuclease OLD35) - Mus musculus (Mouse)                                             | 86541  | 0 | 21 | 0 | 12 |
| Q6ZPV2 | Putative DNA helicase INO80 complex homolog 1 (EC 3.6.1.-) - Mus musculus (Mouse)                                                                                                                                                                         | 177265 | 0 | 21 | 0 | 24 |
| Q9DBG1 | Cytochrome P450 27, mitochondrial precursor (EC 1.14.13.15) (Cytochrome P-450C27/25) (Sterol 26-hydroxylase) (Sterol 27-hydroxylase) (Vitamin D(3) 25-hydroxylase) (5-beta-cholestane-3-alpha,7-alpha,12-alpha-triol 27-hydroxylase) - Mus musculus (Mous | 60910  | 0 | 21 | 0 | 11 |
| Q7TMS5 | ATP-binding cassette sub-family G member 2 (Breast cancer resistance protein 1 homolog) (CD338 antigen) - Mus musculus (Mouse)                                                                                                                            | 73501  | 0 | 21 | 0 | 15 |
| Q9D2C7 | Bax inhibitor 1 (BI-1) (Testis-enhanced gene transcript) - Mus musculus (Mouse)                                                                                                                                                                           | 26745  | 0 | 21 | 0 | 5  |
| Q80US4 | Actin-related protein 5 - Mus musculus (Mouse)                                                                                                                                                                                                            | 68430  | 0 | 21 | 0 | 5  |
| Q9ESN2 | Tripartite motif-containing protein 39 (RING finger protein 23) (Testis-abundant finger protein) - Mus musculus (Mouse)                                                                                                                                   | 57360  | 0 | 21 | 0 | 6  |
| Q6P9P0 | Uncharacterized protein C10orf6 homolog - Mus musculus (Mouse)                                                                                                                                                                                            | 144850 | 0 | 21 | 0 | 22 |
| Q9CUU3 | Synaptonemal complex protein 2 (SCP-2) (Synaptonemal complex lateral element protein) - Mus musculus (Mouse)                                                                                                                                              | 173839 | 0 | 21 | 0 | 18 |

|        |                                                                                                                                                                                                                                     |        |   |    |   |    |
|--------|-------------------------------------------------------------------------------------------------------------------------------------------------------------------------------------------------------------------------------------|--------|---|----|---|----|
| Q8BVE8 | Probable histone-lysine N-methyltransferase NSD2 (EC 2.1.1.43) (Nuclear SET domain-containing protein 2) (Wolf-Hirschhorn syndrome candidate 1 protein homolog) - Mus musculus (Mouse)                                              | 156203 | 0 | 21 | 0 | 12 |
| Q8VBW5 | HMG box transcription factor BBX (Bobby sox homolog) (HMG box-containing protein 2) - Mus musculus (Mouse)                                                                                                                          | 101746 | 0 | 21 | 0 | 17 |
| O35892 | Nuclear autoantigen Sp-100 (Speckled 100 kDa) (Nuclear dot-associated Sp100 protein) - Mus musculus (Mouse)                                                                                                                         | 55433  | 0 | 21 | 0 | 5  |
| Q3UHK6 | Teneurin-4 (Ten-4) (Tenascin-M4) (Ten-m4) (Protein Odd Oz/ten-m homolog 4) (Downstream of CHOP4) - Mus musculus (Mouse)                                                                                                             | 312848 | 0 | 21 | 0 | 26 |
| Q9WTS4 | Teneurin-1 (Ten-1) (Tenascin-M1) (Ten-m1) (Protein Odd Oz/ten-m homolog 1) - Mus musculus (Mouse)                                                                                                                                   | 310447 | 0 | 21 | 0 | 19 |
| Q9WTS6 | Teneurin-3 (Ten-3) (Tenascin-M3) (Ten-m3) (Protein Odd Oz/ten-m homolog 3) - Mus musculus (Mouse)                                                                                                                                   | 307207 | 0 | 21 | 0 | 16 |
| Q8BLG0 | PHD finger protein 20 (Hepatocellular carcinoma-associated antigen 58 homolog) - Mus musculus (Mouse)                                                                                                                               | 116691 | 0 | 21 | 0 | 6  |
| Q99LC8 | Translation initiation factor eIF-2B subunit alpha (eIF-2B GDP-GTP exchange factor subunit alpha) - Mus musculus (Mouse)                                                                                                            | 34023  | 0 | 21 | 0 | 5  |
| O08967 | Cytohesin-3 (PH, SEC7 and coiled-coil domain-containing protein 3) (CLM3) (SEC7 homolog C) (mSec7-3) (ARF nucleotide-binding site opener 3) (Protein ARNO3) (General receptor of phosphoinositides 1) (Grp1) - Mus musculus (Mouse) | 46593  | 0 | 21 | 0 | 13 |
| Q8CDU5 | EF-hand domain-containing family member B - Mus musculus (Mouse)                                                                                                                                                                    | 96366  | 0 | 21 | 0 | 9  |
| Q64701 | Retinoblastoma-like protein 1 (107 kDa retinoblastoma-associated protein) (PRB1) (P107) - Mus musculus (Mouse)                                                                                                                      | 120849 | 0 | 21 | 0 | 11 |

|        |                                                                                                                                                                                                                                                           |        |   |    |   |    |
|--------|-----------------------------------------------------------------------------------------------------------------------------------------------------------------------------------------------------------------------------------------------------------|--------|---|----|---|----|
| Q9QXZ6 | Solute carrier organic anion transporter family member 1A1 (Solute carrier family 21 member 1) (Sodium-independent organic anion-transporting polypeptide 1) (OATP1) - Mus musculus (Mouse)                                                               | 75887  | 0 | 21 | 0 | 9  |
| P60766 | Cell division control protein 42 homolog precursor (G25K GTP-binding protein) - Mus musculus (Mouse)                                                                                                                                                      | 21696  | 0 | 21 | 0 | 4  |
| P35601 | Replication factor C subunit 1 (Replication factor C large subunit) (RF-C 140 kDa subunit) (Activator 1 140 kDa subunit) (Activator 1 large subunit) (A1 140 kDa subunit) (A1-P145) (Differentiation-specific element-binding protein) (ISRE-binding prot | 126705 | 0 | 21 | 0 | 13 |
| Q9CYR6 | Phosphoacetylglucosamine mutase (EC 5.4.2.3) (PAGM) (Acetylglucosamine phosphomutase) (N-acetylglucosamine-phosphate mutase) (Phosphoglucomutase 3) - Mus musculus (Mouse)                                                                                | 60043  | 0 | 21 | 0 | 7  |
| Q8C5R2 | Uncharacterized protein C10orf47 homolog - Mus musculus (Mouse)                                                                                                                                                                                           | 50687  | 0 | 21 | 0 | 6  |
| Q9JLN9 | FKBP12-rapamycin complex-associated protein (FK506-binding protein 12-rapamycin complex-associated protein 1) (Rapamycin target protein) (RAPT1) (Mammalian target of rapamycin) (mTOR) - Mus musculus (Mouse)                                            | 290661 | 0 | 21 | 0 | 19 |
| Q7TN31 | Angiogenic factor with G patch and FHA domains 1 (Angiogenic factor VG5Q) (mVG5Q) - Mus musculus (Mouse)                                                                                                                                                  | 80081  | 0 | 21 | 0 | 4  |
| Q9CWM4 | Prefoldin subunit 1 - Mus musculus (Mouse)                                                                                                                                                                                                                | 14246  | 0 | 21 | 0 | 8  |
| Q5U464 | Development and differentiation-enhancing factor-like 1 - Mus musculus (Mouse)                                                                                                                                                                            | 100355 | 0 | 21 | 0 | 9  |



|        |                                                                                                                                                                                                                      |        |   |    |   |    |
|--------|----------------------------------------------------------------------------------------------------------------------------------------------------------------------------------------------------------------------|--------|---|----|---|----|
| Q9JHW4 | Selenocysteine-specific elongation factor (Elongation factor sec) (Eukaryotic elongation factor, selenocysteine-tRNA-specific) (mSelB) - Mus musculus (Mouse)                                                        | 64060  | 0 | 21 | 0 | 9  |
| Q04690 | Neurofibromin (Neurofibromatosis-related protein NF-1) - Mus musculus (Mouse)                                                                                                                                        | 323097 | 0 | 21 | 0 | 22 |
| Q61091 | Frizzled-8 precursor (Fz-8) (mFz8) - Mus musculus (Mouse)                                                                                                                                                            | 74707  | 0 | 21 | 0 | 8  |
| Q9CSB4 | Partitioning-defective 3 homolog B (PAR3-beta) (Partitioning-defective 3-like protein) (PAR3-L protein) (Amyotrophic lateral sclerosis 2 chromosome region candidate gene 19 protein homolog) - Mus musculus (Mouse) | 133268 | 0 | 21 | 0 | 20 |
| Q62010 | Oviduct-specific glycoprotein precursor (Oviductal glycoprotein) (Oviductin) (Estrogen-dependent oviduct protein) - Mus musculus (Mouse)                                                                             | 78986  | 0 | 21 | 0 | 9  |
| Q9ET26 | Zinc finger protein 313 - Mus musculus (Mouse)                                                                                                                                                                       | 26641  | 0 | 21 | 0 | 14 |
| Q9Z1T6 | FYVE finger-containing phosphoinositide kinase (EC 2.7.1.68) (1-phosphatidylinositol-4-phosphate 5-kinase) (PIP5K) (PtdIns(4)P-5-kinase) (PIKfyve) (p235) - Mus musculus (Mouse)                                     | 235584 | 0 | 21 | 0 | 17 |
| Q99J21 | Mucolipin-1 (Mucolipidin) - Mus musculus (Mouse)                                                                                                                                                                     | 66604  | 0 | 21 | 0 | 7  |
| Q60675 | Laminin subunit alpha-2 precursor (Laminin M chain) (Merosin heavy chain) - Mus musculus (Mouse)                                                                                                                     | 351638 | 0 | 21 | 0 | 35 |
| Q8K2Z2 | Pre-mRNA-processing factor 39 (PRP39 homolog) - Mus musculus (Mouse)                                                                                                                                                 | 73819  | 0 | 21 | 0 | 7  |
| Q61301 | Catenin alpha-2 (Alpha-catenin-related protein) (Alpha N-catenin) - Mus musculus (Mouse)                                                                                                                             | 106018 | 0 | 21 | 0 | 40 |

|        |                                                                                                                                                                                      |        |   |    |   |    |
|--------|--------------------------------------------------------------------------------------------------------------------------------------------------------------------------------------|--------|---|----|---|----|
| Q80V53 | Carbohydrate sulfotransferase D4ST1 (EC 2.8.2.-) (Dermatan 4-sulfotransferase 1) (D4ST-1) - Mus musculus (Mouse)                                                                     | 43517  | 0 | 21 | 0 | 8  |
| Q8K3Z9 | Nuclear envelope pore membrane protein POM 121 (Pore membrane protein of 121 kDa) - Mus musculus (Mouse)                                                                             | 121404 | 0 | 21 | 0 | 2  |
| P06800 | Leukocyte common antigen precursor (EC 3.1.3.48) (L-CA) (Lymphocyte antigen 5) (Ly-5) (T200) (CD45 antigen) - Mus musculus (Mouse)                                                   | 146024 | 0 | 21 | 0 | 19 |
| Q62191 | 52 kDa Ro protein (Sjogren syndrome type A antigen) (SS-A) (Ro(SS-A)) (52 kDa ribonucleoprotein autoantigen Ro/SS-A) (Tripartite motif-containing protein 21) - Mus musculus (Mouse) | 55166  | 0 | 21 | 0 | 6  |
| O35379 | Multidrug resistance-associated protein 1 (ATP-binding cassette sub-family C member 1) (Leukotriene C(4) transporter) (LTC4 transporter) - Mus musculus (Mouse)                      | 172386 | 0 | 21 | 0 | 25 |
| Q8VCT9 | Dual specificity testis-specific protein kinase 2 (EC 2.7.12.1) (Testicular protein kinase 2) - Mus musculus (Mouse)                                                                 | 64057  | 0 | 21 | 0 | 20 |
| P52479 | Ubiquitin carboxyl-terminal hydrolase 10 (EC 3.1.2.15) (Ubiquitin thioesterase 10) (Ubiquitin-specific-processing protease 10) (Deubiquitinating enzyme 10) - Mus musculus (Mouse)   | 87686  | 0 | 21 | 0 | 7  |
| P21183 | Interleukin-5 receptor alpha chain precursor (IL-5R-alpha) (CD125 antigen) - Mus musculus (Mouse)                                                                                    | 47586  | 0 | 21 | 0 | 3  |
| Q91VJ4 | Serine/threonine-protein kinase 38 (EC 2.7.11.1) (NDR1 protein kinase) (Nuclear Dbf2-related kinase 1) - Mus musculus (Mouse)                                                        | 54482  | 0 | 21 | 0 | 9  |
| Q7TSE6 | Serine/threonine-protein kinase 38-like (EC 2.7.11.1) (NDR2 protein kinase) (Nuclear Dbf2-related kinase 2) - Mus musculus (Mouse)                                                   | 53979  | 0 | 21 | 0 | 7  |

|        |                                                                                                                                                                                    |        |   |    |   |    |
|--------|------------------------------------------------------------------------------------------------------------------------------------------------------------------------------------|--------|---|----|---|----|
| P49003 | Bone morphogenetic protein 5 precursor (BMP-5) - Mus musculus (Mouse)                                                                                                              | 51935  | 0 | 21 | 0 | 3  |
| Q920M5 | Coronin-6 (Coronin-like protein E) (Clipin-E) - Mus musculus (Mouse)                                                                                                               | 53022  | 0 | 21 | 0 | 18 |
| Q9DAW6 | U4/U6 small nuclear ribonucleoprotein Prp4 (U4/U6 snRNP 60 kDa protein) (WD splicing factor Prp4) - Mus musculus (Mouse)                                                           | 59018  | 0 | 21 | 0 | 2  |
| O55112 | AF4/FMR2 family member 2 (Fragile X mental retardation protein 2 homolog) (Protein FMR2) (FMR2P) (Protein Ox19) - Mus musculus (Mouse)                                             | 140871 | 0 | 21 | 0 | 15 |
| Q3V0C5 | Ubiquitin carboxyl-terminal hydrolase 48 (EC 3.1.2.15) (Ubiquitin thioesterase 48) (Ubiquitin-specific-processing protease 48) (Deubiquitinating enzyme 48) - Mus musculus (Mouse) | 122607 | 0 | 21 | 0 | 19 |
| Q8BHT6 | Beta-1,3-glucosyltransferase (EC 2.4.1.-) (Beta3Glc-T) (Beta-3-glycosyltransferase-like) - Mus musculus (Mouse)                                                                    | 55964  | 0 | 21 | 0 | 4  |
| Q9ERH6 | Modulator of apoptosis 1 (MAP-1) - Mus musculus (Mouse)                                                                                                                            | 39664  | 0 | 21 | 0 | 7  |
| Q8VEA8 | Ras-related protein Rab-7b - Mus musculus (Mouse)                                                                                                                                  | 22716  | 0 | 21 | 0 | 10 |
| Q8VDC1 | FYVE and coiled-coil domain-containing protein 1 - Mus musculus (Mouse)                                                                                                            | 164060 | 0 | 21 | 0 | 27 |
| Q9D799 | Methionyl-tRNA formyltransferase, mitochondrial precursor (EC 2.1.2.9) (MtFMT) - Mus musculus (Mouse)                                                                              | 43518  | 0 | 21 | 0 | 6  |
| Q9QY61 | Iroquois-class homeodomain protein IRX-4 (Iroquois homeobox protein 4) (Homeodomain protein IRXA3) - Mus musculus (Mouse)                                                          | 55237  | 0 | 21 | 0 | 4  |
| Q64519 | Syndecan-3 precursor (SYND3) - Mus musculus (Mouse)                                                                                                                                | 45973  | 0 | 21 | 0 | 4  |
| P97805 | Protein FAM3D precursor (Oncoprotein-induced protein 1) (Protein EF-7) - Mus musculus (Mouse)                                                                                      | 25200  | 0 | 21 | 0 | 3  |

|        |                                                                                                                                                                                   |        |   |    |   |    |
|--------|-----------------------------------------------------------------------------------------------------------------------------------------------------------------------------------|--------|---|----|---|----|
| Q61334 | B-cell receptor-associated protein 29 (BCR-associated protein Bap29) - Mus musculus (Mouse)                                                                                       | 28003  | 0 | 20 | 0 | 4  |
| Q8CC84 | LysM and putative peptidoglycan binding domain-containing protein 4 - Mus musculus (Mouse)                                                                                        | 31925  | 0 | 20 | 0 | 3  |
| Q8R411 | Ataxin-7 (Spinocerebellar ataxia type 7 protein homolog) - Mus musculus (Mouse)                                                                                                   | 93859  | 0 | 20 | 0 | 17 |
| Q9WVB3 | Transducin-like enhancer protein 6 (Groucho-related protein 6) - Mus musculus                                                                                                     | 65930  | 0 | 20 | 0 | 4  |
| Q8BG67 | Protein EFR3-like - Mus musculus (Mouse)                                                                                                                                          | 93466  | 0 | 20 | 0 | 16 |
| Q60597 | 2-oxoglutarate dehydrogenase E1 component, mitochondrial precursor (EC 1.2.4.2) (Alpha-ketoglutarate dehydrogenase) - Mus musculus (Mouse)                                        | 117298 | 0 | 20 | 0 | 41 |
| Q8BH34 | Semaphorin-3D precursor - Mus musculus (Mouse)                                                                                                                                    | 90632  | 0 | 20 | 0 | 6  |
| P20108 | Thioredoxin-dependent peroxide reductase, mitochondrial precursor (EC 1.11.1.15) (Perioredoxin-3) (PRX III) (Antioxidant protein 1) (AOP-1) (Protein MER5) - Mus musculus (Mouse) | 28337  | 0 | 20 | 0 | 3  |
| Q9Z138 | Tyrosine-protein kinase transmembrane receptor ROR2 precursor (EC 2.7.10.1) (Neurotrophic tyrosine kinase, receptor-related 2) (mROR2) - Mus musculus (Mouse)                     | 106693 | 0 | 20 | 0 | 4  |
| Q9DCC8 | Mitochondrial import receptor subunit TOM20 homolog (Mitochondrial 20 kDa outer membrane protein) (Outer mitochondrial membrane receptor Tom20) - Mus musculus (Mouse)            | 16445  | 0 | 20 | 0 | 2  |
| P46471 | 26S protease regulatory subunit 7 (Proteasome 26S subunit ATPase 2) (Protein MSS1) - Mus musculus (Mouse)                                                                         | 49016  | 0 | 20 | 0 | 7  |
| Q61670 | Homeobox protein HLX1 - Mus musculus (Mouse)                                                                                                                                      | 50276  | 0 | 20 | 0 | 3  |
| Q91WE1 | Sorting nexin-15 - Mus musculus (Mouse)                                                                                                                                           | 37776  | 0 | 20 | 0 | 4  |

|        |                                                                                                                                                                                     |        |   |    |   |    |
|--------|-------------------------------------------------------------------------------------------------------------------------------------------------------------------------------------|--------|---|----|---|----|
| P08775 | DNA-directed RNA polymerase II largest subunit (EC 2.7.7.6) (RPB1) - Mus musculus (Mouse)                                                                                           | 218408 | 0 | 20 | 0 | 31 |
| P97770 | THUMP domain-containing protein 3 (GtROSA26asSor) - Mus musculus (Mouse)                                                                                                            | 57251  | 0 | 20 | 0 | 10 |
| Q9CQZ0 | ORM1-like protein 2 - Mus musculus (Mouse)                                                                                                                                          | 17378  | 0 | 20 | 0 | 5  |
| P25799 | Nuclear factor NF-kappa-B p105 subunit (DNA-binding factor KBF1) (EBP-1) (NF-kappa-B1 p84/NF-kappa-B1 p98) [Contains: Nuclear factor NF-kappa-B p50 subunit] - Mus musculus (Mouse) | 106373 | 0 | 20 | 0 | 13 |
| P01897 | H-2 class I histocompatibility antigen, L-D alpha chain precursor - Mus musculus (Mouse)                                                                                            | 41027  | 0 | 20 | 0 | 2  |
| Q9QXY7 | Membrane transport protein XK (XK-related protein 1) (XK homolog) - Mus musculus (Mouse)                                                                                            | 52107  | 0 | 20 | 0 | 7  |
| Q8C033 | Rho guanine nucleotide exchange factor 10 - Mus musculus (Mouse)                                                                                                                    | 149335 | 0 | 20 | 0 | 9  |
| Q9JK84 | Partitioning defective 6 homolog gamma (PAR-6 gamma) (PAR6A) - Mus musculus (Mouse)                                                                                                 | 42429  | 0 | 20 | 0 | 5  |
| P04444 | Hemoglobin subunit beta-H1 (Hemoglobin beta-H1 chain) (Beta-H1-globin) (Protein Z) - Mus musculus (Mouse)                                                                           | 16541  | 0 | 20 | 0 | 4  |
| Q9DBB4 | NMDA receptor-regulated 1-like protein (NARG1-like protein) - Mus musculus (Mouse)                                                                                                  | 102302 | 0 | 20 | 0 | 15 |
| Q8VE92 | RNA-binding protein 4B (RNA-binding motif protein 4B) (RNA-binding protein 30) (RNA-binding motif protein 30) - Mus musculus (Mouse)                                                | 40308  | 0 | 20 | 0 | 13 |
| Q8R1X6 | Spartin - Mus musculus (Mouse)                                                                                                                                                      | 73237  | 0 | 20 | 0 | 7  |
| Q6EJB6 | U3 small nucleolar RNA-associated protein 14 homolog B (Juvenile spermatogonial depletion protein) - Mus musculus (Mouse)                                                           | 86160  | 0 | 20 | 0 | 18 |

|        |                                                                                                                                                                                                                                                           |        |   |    |   |    |
|--------|-----------------------------------------------------------------------------------------------------------------------------------------------------------------------------------------------------------------------------------------------------------|--------|---|----|---|----|
| Q80XK6 | Uncharacterized protein C14orf103 homolog - Mus musculus (Mouse)                                                                                                                                                                                          | 101278 | 0 | 20 | 0 | 33 |
| Q9WUB0 | RanBP-type and C3HC4-type zinc finger-containing protein 1 (Ubiquitin-conjugating enzyme 7-interacting protein 3) (UbcM4-interacting protein 28) - Mus musculus (Mouse)                                                                                   | 58132  | 0 | 20 | 0 | 6  |
| O88809 | Neuronal migration protein doublecortin (Lissencephalin-X) (Lis-X) (Doublin) - Mus musculus (Mouse)                                                                                                                                                       | 40872  | 0 | 20 | 0 | 4  |
| O35615 | Zinc finger protein ZFPM1 (Zinc finger protein multitype 1) (Friend of GATA protein 1) (Friend of GATA-1) (FOG-1) - Mus musculus (Mouse)                                                                                                                  | 107571 | 0 | 20 | 0 | 7  |
| Q01705 | Neurogenic locus notch homolog protein 1 precursor (Notch 1) (Motch A) (mT14) (p300) [Contains: Notch 1 extracellular truncation; Notch 1 intracellular domain] - Mus musculus (Mouse)                                                                    | 285104 | 0 | 20 | 0 | 5  |
| Q01320 | DNA topoisomerase 2-alpha (EC 5.99.1.3) (DNA topoisomerase II, alpha isozyme) - Mus musculus (Mouse)                                                                                                                                                      | 173567 | 0 | 20 | 0 | 27 |
| Q3UMF0 | Cordon-bleu protein-like 1 (Cobl-related protein 1) - Mus musculus (Mouse)                                                                                                                                                                                | 137924 | 0 | 20 | 0 | 16 |
| Q9EQQ9 | Bifunctional protein NCOAT (Nuclear cytoplasmic O-GlcNAcase and acetyltransferase) (Meningioma-expressed antigen 5) [Includes: Beta-hexosaminidase (EC 3.2.1.52) (N-acetyl-beta-glucosaminidase) (Beta-N-acetylhexosaminidase) (Hexosaminidase C) (N-acet | 104179 | 0 | 20 | 0 | 4  |
| Q64429 | Cytochrome P450 1B1 (EC 1.14.14.1) (CYPIB1) (P450CMEF) (P450EF) - Mus musculus (Mouse)                                                                                                                                                                    | 60999  | 0 | 20 | 0 | 13 |

|        |                                                                                                                                               |       |   |    |   |    |
|--------|-----------------------------------------------------------------------------------------------------------------------------------------------|-------|---|----|---|----|
| Q80ZV0 | Ribonuclease H2 subunit B (RNase H2 subunit B) (Ribonuclease HI subunit B) (Deleted in lymphocytic leukemia 8 homolog) - Mus musculus (Mouse) | 34821 | 0 | 20 | 0 | 8  |
| Q9D8K8 | Solute carrier family 25 member 39 - Mus musculus (Mouse)                                                                                     | 39538 | 0 | 20 | 0 | 1  |
| P20352 | Tissue factor precursor (TF) (Coagulation factor III) (CD142 antigen) - Mus musculus (Mouse)                                                  | 33256 | 0 | 20 | 0 | 1  |
| P40336 | Vacuolar protein sorting-associated protein 26A (Vesicle protein sorting 26A) (mVPS26) (H<beta>58 protein) (H beta 58) - Mus musculus (Mouse) | 38204 | 0 | 20 | 0 | 3  |
| P13412 | Troponin I, fast skeletal muscle (Troponin I, fast-twitch isoform) - Mus musculus (Mouse)                                                     | 21515 | 0 | 20 | 0 | 1  |
| Q9WVC8 | Chloride anion exchanger (Protein DRA) (Down-regulated in adenoma) (Solute carrier family 26 member 3) - Mus musculus (Mouse)                 | 84107 | 0 | 20 | 0 | 5  |
| Q8VCM7 | Fibrinogen gamma chain precursor - Mus musculus (Mouse)                                                                                       | 50044 | 0 | 20 | 0 | 19 |
| Q9EQK5 | Major vault protein (MVP) - Mus musculus (Mouse)                                                                                              | 96178 | 0 | 20 | 0 | 11 |
| Q6PAM1 | Alpha-taxilin - Mus musculus (Mouse)                                                                                                          | 62787 | 0 | 20 | 0 | 48 |
| Q8VBT1 | Beta-taxilin (Muscle-derived protein 77) - Mus musculus (Mouse)                                                                               | 77730 | 0 | 20 | 0 | 5  |
| Q9Z2H5 | Band 4.1-like protein 1 (Neuronal protein 4.1) (4.1N) - Mus musculus (Mouse)                                                                  | 98881 | 0 | 20 | 0 | 7  |
| Q8CCJ3 | Uncharacterized protein KIAA0776 - Mus musculus (Mouse)                                                                                       | 90035 | 0 | 20 | 0 | 17 |
| Q8R016 | Bleomycin hydrolase (EC 3.4.22.40) (BLM hydrolase) (BMH) (BH) - Mus musculus (Mouse)                                                          | 53104 | 0 | 20 | 0 | 8  |

|        |                                                                                                                                                                                                                        |        |   |    |   |    |
|--------|------------------------------------------------------------------------------------------------------------------------------------------------------------------------------------------------------------------------|--------|---|----|---|----|
| Q54732 | Matrix metalloproteinase-15 precursor (EC 3.4.24.-) (MMP-15) (Membrane-type matrix metalloproteinase 2) (MT-MMP2) (MTMMP2) (Membrane-type-2 matrix metalloproteinase) (MT2-MMP) (MT2MMP) - Mus musculus (Mouse)        | 75074  | 0 | 20 | 0 | 1  |
| P08920 | T-cell surface antigen CD2 precursor (T-cell surface antigen T11/Leu-5) (LFA-2) (LFA-3 receptor) (Lymphocyte antigen 37) (Ly-37) - Mus musculus (Mouse)                                                                | 38903  | 0 | 20 | 0 | 4  |
| Q9D4H9 | PHD finger protein 14 - Mus musculus (Mouse)                                                                                                                                                                           | 100811 | 0 | 20 | 0 | 7  |
| Q8K093 | Thyrotropin-releasing hormone-degrading ectoenzyme (EC 3.4.19.6) (TRH-degrading ectoenzyme) (TRH-DE) (TRH-specific aminopeptidase) (Thyroliberinase) (Pyroglutamyl-peptidase II) (PAP-II) - Mus musculus (Mouse)       | 117897 | 0 | 20 | 0 | 6  |
| Q6A068 | Cell division cycle 5-related protein (Cdc5-like protein) - Mus musculus (Mouse)                                                                                                                                       | 92361  | 0 | 20 | 0 | 9  |
| Q9Z0U1 | Tight junction protein ZO-2 (Zonula occludens 2 protein) (Zona occludens 2 protein) (Tight junction protein 2) - Mus musculus (Mouse)                                                                                  | 131428 | 0 | 20 | 0 | 12 |
| P08680 | 5-aminolevulinic acid synthase, erythroid-specific, mitochondrial precursor (EC 2.3.1.37) (5-aminolevulinic acid synthase) (Delta-aminolevulinic acid synthase) (Delta-ALA synthetase) (ALAS-E) - Mus musculus (Mouse) | 65510  | 0 | 20 | 0 | 10 |
| Q68FE8 | Suppressor of hairy wing homolog 4 - Mus musculus (Mouse)                                                                                                                                                              | 109820 | 0 | 20 | 0 | 12 |
| P97926 | Oxytocin receptor (OT-R) - Mus musculus (Mouse)                                                                                                                                                                        | 43579  | 0 | 20 | 0 | 4  |
| Q5SWU9 | Acetyl-CoA carboxylase 1 (EC 6.4.1.2) (ACC-alpha) (Acetyl-CoA carboxylase 265) [Includes: Biotin carboxylase (EC 6.3.4.14)] - Mus musculus (Mouse)                                                                     | 266685 | 0 | 20 | 0 | 33 |
| P51125 | Calpastatin (Calpain inhibitor) - Mus musculus (Mouse)                                                                                                                                                                 | 85099  | 0 | 20 | 0 | 13 |



|        |                                                                                                                                                                                                                                                           |        |   |    |   |    |
|--------|-----------------------------------------------------------------------------------------------------------------------------------------------------------------------------------------------------------------------------------------------------------|--------|---|----|---|----|
| Q923J1 | Transient receptor potential cation channel subfamily M member 7 (EC 2.7.11.1) (Long transient receptor potential channel 7) (LTrpC7) (Channel-kinase 1) (Transient receptor potential-phospholipase C-interacting kinase) (TRP-PLIK) - Mus musculus (Mou | 214372 | 0 | 20 | 0 | 9  |
| Q99MZ3 | Williams-Beuren syndrome chromosome region 14 protein homolog (Mlx interactor) (MLX-interacting protein-like) - Mus musculus (Mouse)                                                                                                                      | 95443  | 0 | 20 | 0 | 7  |
| P30204 | Macrophage scavenger receptor types I and II (Macrophage acetylated LDL receptor I and II) (Scavenger receptor type A) (SR-A) - Mus musculus (Mouse)                                                                                                      | 50669  | 0 | 19 | 0 | 5  |
| Q7TS72 | Inositol-trisphosphate 3-kinase C (EC 2.7.1.127) (Inositol 1,4,5-trisphosphate 3-kinase C) (IP3K-C) - Mus musculus (Mouse)                                                                                                                                | 75359  | 0 | 19 | 0 | 4  |
| Q69ZU6 | Thrombospondin type-1 domain-containing protein 7A precursor - Mus musculus (Mouse)                                                                                                                                                                       | 190990 | 0 | 19 | 0 | 33 |
| Q35136 | Neural cell adhesion molecule 2 precursor (N-CAM 2) (RB-8 neural cell adhesion molecule) (R4B12) - Mus musculus (Mouse)                                                                                                                                   | 93944  | 0 | 19 | 0 | 6  |
| Q88379 | Bromodomain adjacent to zinc finger domain protein 1A (Cbp146) - Mus musculus (Mouse)                                                                                                                                                                     | 179917 | 0 | 19 | 0 | 16 |
| Q99P68 | Sclerostin precursor - Mus musculus (Mouse)                                                                                                                                                                                                               | 24055  | 0 | 19 | 0 | 3  |
| Q9D7X1 | BTB/POZ domain-containing protein KCTD4 - Mus musculus (Mouse)                                                                                                                                                                                            | 30302  | 0 | 19 | 0 | 3  |
| P70404 | Isocitrate dehydrogenase [NAD] subunit gamma, mitochondrial precursor (EC 1.1.1.41) (Isocitric dehydrogenase) (NAD(+)-specific ICDH) - Mus musculus (Mouse)                                                                                               | 43157  | 0 | 19 | 0 | 12 |
| Q99JY9 | Actin-like protein 3 (Actin-related protein 3) - Mus musculus (Mouse)                                                                                                                                                                                     | 47783  | 0 | 19 | 0 | 3  |

|        |                                                                                                                                                                                                                           |        |   |    |   |    |
|--------|---------------------------------------------------------------------------------------------------------------------------------------------------------------------------------------------------------------------------|--------|---|----|---|----|
| Q9WVF7 | DNA polymerase epsilon, catalytic subunit A (EC 2.7.7.7) (DNA polymerase II subunit A) - Mus musculus (Mouse)                                                                                                             | 264597 | 0 | 19 | 0 | 12 |
| Q91ZF0 | DPH4 homolog (CSL-type zinc finger-containing protein 3) (J domain protein DjC7) - Mus musculus (Mouse)                                                                                                                   | 22597  | 0 | 19 | 0 | 5  |
| Q9DBJ3 | Brain-specific angiogenesis inhibitor 1-associated protein 2-like protein 1 (BAI1-associated protein 2-like protein 1) - Mus musculus (Mouse)                                                                             | 57494  | 0 | 19 | 0 | 19 |
| P31230 | Multisynthetase complex auxiliary component p43 [Contains: Endothelial monocyte-activating polypeptide 2 (EMAP-II) (Small inducible cytokine subfamily E member 1)] - Mus musculus (Mouse)                                | 34318  | 0 | 19 | 0 | 10 |
| Q6P5G6 | UBX domain-containing protein 7 - Mus musculus (Mouse)                                                                                                                                                                    | 52531  | 0 | 19 | 0 | 1  |
| Q03265 | ATP synthase subunit alpha, mitochondrial precursor (EC 3.6.3.14) - Mus musculus (Mouse)                                                                                                                                  | 59830  | 0 | 19 | 0 | 15 |
| Q5I2A0 | Serine protease inhibitor A3G (Serine protease inhibitor 2A) (Serp1n A3G) (Serp1n 2A) - Mus musculus (Mouse)                                                                                                              | 49389  | 0 | 19 | 0 | 6  |
| P23578 | Acrosin precursor (EC 3.4.21.10) [Contains: Acrosin light chain; Acrosin heavy chain] - Mus musculus (Mouse)                                                                                                              | 49639  | 0 | 19 | 0 | 7  |
| Q9DCN2 | NADH-cytochrome b5 reductase (EC 1.6.2.2) (B5R) (Diaphorase-1) (Cytochrome b5 reductase 3) [Contains: NADH-cytochrome b5 reductase membrane-bound form; NADH-cytochrome b5 reductase soluble form] - Mus musculus (Mouse) | 34334  | 0 | 19 | 0 | 5  |
| P51175 | Protoporphyrinogen oxidase (EC 1.3.3.4) (PPO) - Mus musculus (Mouse)                                                                                                                                                      | 51238  | 0 | 19 | 0 | 10 |
| Q9QWW1 | Homer protein homolog 2 (Homer-2) (Cupidin) (VASP/Ena-related gene up-regulated during seizure and LTP 2) (Vesl-2) - Mus musculus (Mouse)                                                                                 | 40773  | 0 | 19 | 0 | 3  |
| Q8CGA2 | TBC1 domain family member 14 - Mus musculus (Mouse)                                                                                                                                                                       | 77563  | 0 | 19 | 0 | 10 |

|        |                                                                                                                                                                                                              |        |   |    |   |    |
|--------|--------------------------------------------------------------------------------------------------------------------------------------------------------------------------------------------------------------|--------|---|----|---|----|
| Q7TQ62 | Podocan precursor - Mus musculus (Mouse)                                                                                                                                                                     | 68904  | 0 | 19 | 0 | 2  |
| Q9Z1W9 | STE20/SPS1-related proline-alanine-rich protein kinase (EC 2.7.11.1) (Ste-20-related kinase) (Serine/threonine-protein kinase 39) - Mus musculus (Mouse)                                                     | 60795  | 0 | 19 | 0 | 10 |
| Q6P9R2 | Serine/threonine-protein kinase OSR1 (EC 2.7.11.1) (Oxidative stress-responsive 1 protein) - Mus musculus (Mouse)                                                                                            | 58462  | 0 | 19 | 0 | 7  |
| P70245 | 3-beta-hydroxysteroid-Delta(8),Delta(7)-isomerase (EC 5.3.3.5) (Cholestenol Delta-isomerase) (Delta(8)-Delta(7) sterol isomerase) (D8-D7 sterol isomerase) (Emopamil-binding protein) - Mus musculus (Mouse) | 26426  | 0 | 19 | 0 | 3  |
| Q91W36 | Ubiquitin carboxyl-terminal hydrolase 3 (EC 3.1.2.15) (Ubiquitin thioesterase 3) (Ubiquitin-specific-processing protease 3) (Deubiquitinating enzyme 3) - Mus musculus (Mouse)                               | 60427  | 0 | 19 | 0 | 7  |
| Q9CYH2 | Uncharacterized protein C10orf58 homolog precursor - Mus musculus (Mouse)                                                                                                                                    | 24493  | 0 | 19 | 0 | 3  |
| P70700 | DNA-directed RNA polymerase I 135 kDa polypeptide (EC 2.7.7.6) (RNA polymerase I subunit 2) (RPA135) - Mus musculus (Mouse)                                                                                  | 129603 | 0 | 19 | 0 | 11 |
| P51791 | Chloride channel protein 3 (ClC-3) - Mus musculus (Mouse)                                                                                                                                                    | 85447  | 0 | 19 | 0 | 15 |
| Q99MR1 | PERQ amino acid-rich with GYF domain-containing protein 1 (Grb10-interacting GYF protein 1) - Mus musculus (Mouse)                                                                                           | 116623 | 0 | 19 | 0 | 18 |
| P13020 | Gelsolin precursor (Actin-depolymerizing factor) (ADF) (Brevin) - Mus musculus (Mouse)                                                                                                                       | 86287  | 0 | 19 | 0 | 9  |
| Q05920 | Pyruvate carboxylase, mitochondrial precursor (EC 6.4.1.1) (Pyruvic carboxylase) (PCB) - Mus musculus (Mouse)                                                                                                | 130344 | 0 | 19 | 0 | 16 |

|        |                                                                                                                                                                                                                                   |        |   |    |   |    |
|--------|-----------------------------------------------------------------------------------------------------------------------------------------------------------------------------------------------------------------------------------|--------|---|----|---|----|
| O70481 | E3 ubiquitin-protein ligase UBR1 (EC 6.3.2.-) (N-recognin-1) (Ubiquitin-protein ligase E3-alpha-1) (Ubiquitin-protein ligase E3-alpha-1) - Mus musculus (Mouse)                                                                   | 203451 | 0 | 19 | 0 | 9  |
| Q8K4I3 | Rho guanine nucleotide exchange factor 6 (Rac/Cdc42 guanine nucleotide exchange factor 6) - Mus musculus (Mouse)                                                                                                                  | 88307  | 0 | 19 | 0 | 12 |
| Q7TSH3 | Zinc finger protein 516 - Mus musculus (Mouse)                                                                                                                                                                                    | 126820 | 0 | 19 | 0 | 7  |
| P01849 | T-cell receptor alpha chain C region - Mus musculus (Mouse)                                                                                                                                                                       | 15656  | 0 | 19 | 0 | 8  |
| P46460 | Vesicle-fusing ATPase (EC 3.6.4.6) (Vesicular-fusion protein NSF) (N-ethylmaleimide sensitive fusion protein) (NEM-sensitive fusion protein) (Suppressor of K(+) transport growth defect 2) (Protein SKD2) - Mus musculus (Mouse) | 83083  | 0 | 19 | 0 | 20 |
| Q9QXN3 | Activating signal cointegrator 1 (ASC-1) (Thyroid receptor-interacting protein 4) (TRIP-4) - Mus musculus (Mouse)                                                                                                                 | 67078  | 0 | 19 | 0 | 8  |
| Q9QXV3 | Inhibitor of growth protein 1 - Mus musculus (Mouse)                                                                                                                                                                              | 32545  | 0 | 19 | 0 | 4  |
| Q8C0T5 | Signal-induced proliferation-associated 1-like protein 1 - Mus musculus (Mouse)                                                                                                                                                   | 198106 | 0 | 19 | 0 | 38 |
| Q91XD2 | LIM and senescent cell antigen-like-containing domain protein 2 (Particularly interesting new Cys-His protein 2) (PINCH-2) - Mus musculus (Mouse)                                                                                 | 40943  | 0 | 19 | 0 | 3  |
| Q925U4 | ER degradation-enhancing alpha-mannosidase-like 1 - Mus musculus (Mouse)                                                                                                                                                          | 74167  | 0 | 19 | 0 | 5  |
| Q9WTR5 | Cadherin-13 precursor (Truncated-cadherin) (T-cadherin) (T-cad) (Heart-cadherin) (H-cadherin) - Mus musculus (Mouse)                                                                                                              | 78636  | 0 | 19 | 0 | 8  |
| Q8BMG1 | ATR-interacting protein (ATM and Rad3-related-interacting protein) - Mus musculus (Mouse)                                                                                                                                         | 86848  | 0 | 19 | 0 | 5  |
| Q8BSD5 | SH2 domain-containing adapter protein E - Mus musculus (Mouse)                                                                                                                                                                    | 53605  | 0 | 19 | 0 | 15 |

|        |                                                                                                                                                                                                               |        |   |    |   |    |
|--------|---------------------------------------------------------------------------------------------------------------------------------------------------------------------------------------------------------------|--------|---|----|---|----|
| P13439 | Uridine 5~-monophosphate synthase (UMP synthase) [Includes: Orotate phosphoribosyltransferase (EC 2.4.2.10) (OPRTase); Orotidine 5~-phosphate decarboxylase (EC 4.1.1.23) (OMPdecase)] - Mus musculus (Mouse) | 52773  | 0 | 19 | 0 | 6  |
| Q812A2 | SLIT-ROBO Rho GTPase-activating protein 3 (srGAP3) (srGAP2) (WAVE-associated Rac GTPase-activating protein) (WRP) (Rho GTPase-activating protein 14) - Mus musculus (Mouse)                                   | 125311 | 0 | 19 | 0 | 14 |
| Q9CR29 | Coiled-coil domain-containing protein 43 - Mus musculus (Mouse)                                                                                                                                               | 25091  | 0 | 19 | 0 | 3  |
| Q9D2J7 | Ankyrin repeat domain-containing protein 5 - Mus musculus (Mouse)                                                                                                                                             | 87590  | 0 | 19 | 0 | 11 |
| P15247 | Interleukin-9 precursor (IL-9) (T-cell growth factor P40) (P40 cytokine) - Mus musculus (Mouse)                                                                                                               | 16634  | 0 | 19 | 0 | 7  |
| Q9JMK2 | Casein kinase I isoform epsilon (EC 2.7.11.1) (CKI-epsilon) (CKIe) - Mus musculus (Mouse)                                                                                                                     | 47577  | 0 | 19 | 0 | 34 |
| Q9QZ57 | Heat-shock protein beta-3 (HspB3) - Mus musculus (Mouse)                                                                                                                                                      | 17333  | 0 | 19 | 0 | 9  |
| Q8BYR5 | Calcium-dependent secretion activator 2 (Calcium-dependent activator protein for secretion 2) (CAPS-2) - Mus musculus (Mouse)                                                                                 | 148945 | 0 | 19 | 0 | 52 |
| P15501 | Prostatic spermine-binding protein precursor (SBP) (Major prostatic secretory glycoprotein) (P25) - Mus musculus (Mouse)                                                                                      | 22124  | 0 | 19 | 0 | 2  |
| Q60954 | Homeobox protein Meis1 (Myeloid ecotropic viral integration site 1) - Mus musculus (Mouse)                                                                                                                    | 43317  | 0 | 19 | 0 | 5  |
| Q9R0G8 | Nik-related protein kinase (EC 2.7.11.1) (Nck-interacting kinase-like embryo specific kinase) (NIK-like embryo-specific kinase) (NESK) - Mus musculus (Mouse)                                                 | 164543 | 0 | 19 | 0 | 8  |

|        |                                                                                                                                                               |        |   |    |   |    |
|--------|---------------------------------------------------------------------------------------------------------------------------------------------------------------|--------|---|----|---|----|
| Q9EQU5 | Protein SET (Phosphatase 2A inhibitor I2PP2A) (I-2PP2A) (Template-activating factor I) (TAF-I) - Mus musculus (Mouse)                                         | 33358  | 0 | 19 | 0 | 5  |
| Q6PE01 | WD repeat protein 57 - Mus musculus (Mouse)                                                                                                                   | 39707  | 0 | 19 | 0 | 4  |
| Q78PY7 | Staphylococcal nuclease domain-containing protein 1 (p100 co-activator) (100 kDa coactivator) - Mus musculus (Mouse)                                          | 102709 | 0 | 19 | 0 | 13 |
| Q9CQ56 | Vesicle transport protein USE1 (USE1-like protein) (Protein D12) - Mus musculus (Mouse)                                                                       | 30802  | 0 | 19 | 0 | 14 |
| P52875 | Transmembrane protein 165 (Transmembrane protein TPARG) (TPA-regulated locus protein) (Transmembrane protein PFT27) - Mus musculus (Mouse)                    | 34940  | 0 | 19 | 0 | 3  |
| Q7TQ95 | Protein lunapark (Protein ulnaless) - Mus musculus (Mouse)                                                                                                    | 47755  | 0 | 19 | 0 | 24 |
| P02301 | Histone H3-like (Embryonic) - Mus musculus (Mouse)                                                                                                            | 15088  | 0 | 19 | 0 | 21 |
| Q8CEE6 | PAS domain-containing serine/threonine-protein kinase (EC 2.7.11.1) (PAS-kinase) (PASKIN) - Mus musculus (Mouse)                                              | 153634 | 0 | 18 | 0 | 14 |
| Q9Z2V6 | Histone deacetylase 5 (HD5) (Histone deacetylase mHDA1) - Mus musculus (Mouse)                                                                                | 121779 | 0 | 18 | 0 | 24 |
| P23204 | Peroxisome proliferator-activated receptor alpha (PPAR-alpha) - Mus musculus (Mouse)                                                                          | 53453  | 0 | 18 | 0 | 1  |
| Q9QWF0 | Chromatin assembly factor 1 subunit A (CAF-1 subunit A) (Chromatin assembly factor I p150 subunit) (CAF-I 150 kDa subunit) (CAF-Ip150) - Mus musculus (Mouse) | 103297 | 0 | 18 | 0 | 16 |
| Q9CPV1 | Spindle and kinetochore-associated protein 1 - Mus musculus (Mouse)                                                                                           | 29711  | 0 | 18 | 0 | 8  |
| Q8R0A6 | V-set and transmembrane domain-containing protein 2 precursor - Mus musculus (Mouse)                                                                          | 25900  | 0 | 18 | 0 | 7  |
| Q80TZ9 | Arginine-glutamic acid dipeptide repeats protein (Atrophin-2) - Mus musculus (Mouse)                                                                          | 172759 | 0 | 18 | 0 | 9  |

|        |                                                                                                                                                                                                                                      |        |   |    |   |    |
|--------|--------------------------------------------------------------------------------------------------------------------------------------------------------------------------------------------------------------------------------------|--------|---|----|---|----|
| Q88697 | Serine/threonine-protein kinase 16 (EC 2.7.11.1) (Protein kinase PKL12) (Myristoylated and palmitoylated serine/threonine-protein kinase) (MPSK) (TGF-beta-stimulated factor 1) (TSF-1) (Protein kinase Krct) - Mus musculus (Mouse) | 34759  | 0 | 18 | 0 | 2  |
| P06799 | Interferon alpha-7 precursor - Mus musculus (Mouse)                                                                                                                                                                                  | 22045  | 0 | 18 | 0 | 2  |
| Q8R422 | CD109 antigen homolog precursor (GPI-anchored alpha-2 macroglobulin-related protein) - Mus musculus (Mouse)                                                                                                                          | 162356 | 0 | 18 | 0 | 6  |
| Q9JLJ4 | Elongation of very long chain fatty acids protein 2 - Mus musculus (Mouse)                                                                                                                                                           | 34470  | 0 | 18 | 0 | 3  |
| Q99L88 | Beta-1-syntrophin (59 kDa dystrophin-associated protein A1 basic component 1) (DAPA1B) (Syntrophin 2) - Mus musculus (Mouse)                                                                                                         | 58444  | 0 | 18 | 0 | 12 |
| Q9CQH0 | PDZK1-interacting protein 1 (17 kDa membrane-associated protein) - Mus musculus (Mouse)                                                                                                                                              | 12404  | 0 | 18 | 0 | 2  |
| P21981 | Protein-glutamine gamma-glutamyltransferase 2 (EC 2.3.2.13) (Tissue transglutaminase) (TGase C) (TGC) (TG(C)) (Transglutaminase-2) - Mus musculus (Mouse)                                                                            | 78138  | 0 | 18 | 0 | 5  |
| Q8BX02 | Ankyrin repeat domain-containing protein 25 - Mus musculus (Mouse)                                                                                                                                                                   | 90988  | 0 | 18 | 0 | 6  |
| P35821 | Tyrosine-protein phosphatase non-receptor type 1 (EC 3.1.3.48) (Protein-tyrosine phosphatase 1B) (PTP-1B) (Protein-protein-tyrosine phosphatase HA2) (PTP-HA2) - Mus musculus (Mouse)                                                | 50189  | 0 | 18 | 0 | 3  |
| O70445 | BRCA1-associated RING domain protein 1 (BARD-1) - Mus musculus (Mouse)                                                                                                                                                               | 85683  | 0 | 18 | 0 | 12 |
| Q8K3Z0 | Caspase recruitment domain-containing protein 15 (Protein Nod2) - Mus musculus (Mouse)                                                                                                                                               | 115257 | 0 | 18 | 0 | 8  |
| Q55106 | Striatin - Mus musculus (Mouse)                                                                                                                                                                                                      | 86417  | 0 | 18 | 0 | 17 |

|        |                                                                                                                                         |        |   |    |   |    |
|--------|-----------------------------------------------------------------------------------------------------------------------------------------|--------|---|----|---|----|
| P50429 | Arylsulfatase B precursor (EC 3.1.6.12) (ASB) (N-acetylgalactosamine-4-sulfatase) (G4S) - Mus musculus (Mouse)                          | 60179  | 0 | 18 | 0 | 8  |
| Q9D8P4 | 39S ribosomal protein L17, mitochondrial precursor (L17mt) (MRP-L17) - Mus musculus (Mouse)                                             | 20294  | 0 | 18 | 0 | 5  |
| Q921L5 | Conserved oligomeric Golgi complex component 2 (Low density lipoprotein receptor defect C-complementing protein) - Mus musculus (Mouse) | 82446  | 0 | 18 | 0 | 12 |
| Q8VC34 | UPF0385 protein C1orf82 homolog - Mus musculus (Mouse)                                                                                  | 69343  | 0 | 18 | 0 | 9  |
| Q8R3I3 | Conserved oligomeric Golgi complex component 6 - Mus musculus (Mouse)                                                                   | 68268  | 0 | 18 | 0 | 16 |
| Q9CR53 | Neuromedin-B precursor [Contains: Neuromedin-B-32; Neuromedin-B] - Mus musculus (Mouse)                                                 | 13562  | 0 | 18 | 0 | 16 |
| Q8K382 | DENN domain-containing protein 1A - Mus musculus (Mouse)                                                                                | 112065 | 0 | 18 | 0 | 6  |
| Q9QYR6 | Microtubule-associated protein 1A (MAP 1A) - Mus musculus (Mouse)                                                                       | 301326 | 0 | 18 | 0 | 25 |
| Q9CQW3 | Vitamin K-dependent protein Z precursor - Mus musculus (Mouse)                                                                          | 45587  | 0 | 18 | 0 | 7  |
| Q8VCC1 | 15-hydroxyprostaglandin dehydrogenase [NAD+] (EC 1.1.1.141) (PGDH) (Prostaglandin dehydrogenase 1) - Mus musculus (Mouse)               | 29390  | 0 | 18 | 0 | 9  |
| Q99LH1 | Nucleolar GTP-binding protein 2 - Mus musculus (Mouse)                                                                                  | 83563  | 0 | 18 | 0 | 11 |
| Q810B6 | Ankyrin repeat and FYVE domain-containing protein 1 (Ankyrin repeats hooked to a zinc finger motif) - Mus musculus (Mouse)              | 130177 | 0 | 18 | 0 | 16 |
| Q35367 | Keratocan precursor (KTN) (Keratan sulfate proteoglycan keratocan) - Mus musculus (Mouse)                                               | 40777  | 0 | 18 | 0 | 10 |
| Q923S6 | Neutralized-like protein 1 (m-neutralized 1) (m-neu1) - Mus musculus (Mouse)                                                            | 63107  | 0 | 18 | 0 | 9  |



|        |                                                                                                                                                                                                                                                           |        |   |    |   |    |
|--------|-----------------------------------------------------------------------------------------------------------------------------------------------------------------------------------------------------------------------------------------------------------|--------|---|----|---|----|
| Q4LFA9 | Semaphorin-3G precursor - Mus musculus (Mouse)                                                                                                                                                                                                            | 87895  | 0 | 18 | 0 | 11 |
| P48410 | ATP-binding cassette sub-family D member 1 (Adrenoleukodystrophy protein) (ALDP) - Mus musculus (Mouse)                                                                                                                                                   | 82320  | 0 | 18 | 0 | 6  |
| Q61176 | Arginase-1 (EC 3.5.3.1) (Type I arginase) (Liver-type arginase) - Mus musculus (Mouse)                                                                                                                                                                    | 34957  | 0 | 18 | 0 | 11 |
| P06837 | Neuromodulin (Axonal membrane protein GAP-43) (Growth-associated protein 43) (Calmodulin-binding protein P-57) - Mus musculus (Mouse)                                                                                                                     | 23732  | 0 | 18 | 0 | 8  |
| Q8BVG4 | Dipeptidyl peptidase 9 (EC 3.4.14.5) (Dipeptidyl peptidase IX) (DP9) (Dipeptidyl peptidase-like protein 9) (DPLP9) - Mus musculus (Mouse)                                                                                                                 | 98965  | 0 | 18 | 0 | 1  |
| Q80XR2 | Calcium-transporting ATPase type 2C member 1 (EC 3.6.3.8) (ATPase 2C1) (ATP-dependent Ca(2+) pump PMR1) - Mus musculus (Mouse)                                                                                                                            | 101320 | 0 | 18 | 0 | 19 |
| O35488 | Very-long-chain acyl-CoA synthetase (EC 6.2.1.-) (VLCS) (Very-long-chain-fatty-acid-CoA ligase) (VLACS) (THCA-CoA ligase) (Fatty-acid-coenzyme A ligase, very long-chain 1) (Long-chain-fatty-acid--CoA ligase) (EC 6.2.1.3) (Fatty acid transport protei | 71120  | 0 | 18 | 0 | 5  |
| Q9D424 | Calcium-binding tyrosine phosphorylation-regulated protein (Calcium-binding protein 86) (Testis-specific calcium-binding protein CBP86) - Mus musculus (Mouse)                                                                                            | 48531  | 0 | 18 | 0 | 7  |
| Q7TN58 | Transmembrane channel-like protein 8 (Epidermodysplasia verruciformis protein 2 homolog) - Mus musculus (Mouse)                                                                                                                                           | 83303  | 0 | 18 | 0 | 9  |
| Q9R226 | KH domain-containing, RNA-binding, signal transduction-associated protein 3 (Sam68-like mammalian protein 2) (SLM-2) (RNA-binding protein Etoile) - Mus musculus (Mouse)                                                                                  | 38784  | 0 | 18 | 0 | 6  |

|        |                                                                                                                                                                  |        |   |    |   |    |
|--------|------------------------------------------------------------------------------------------------------------------------------------------------------------------|--------|---|----|---|----|
| P39688 | Proto-oncogene tyrosine-protein kinase Fyn (EC 2.7.10.2) (p59-Fyn) - Mus musculus (Mouse)                                                                        | 60533  | 0 | 18 | 0 | 3  |
| P59281 | Protein KIAA1688 - Mus musculus (Mouse)                                                                                                                          | 126268 | 0 | 18 | 0 | 15 |
| Q7TT79 | Microcephalin - Mus musculus (Mouse)                                                                                                                             | 91514  | 0 | 18 | 0 | 34 |
| P41241 | Tyrosine-protein kinase CSK (EC 2.7.10.2) (C-SRC kinase) (Protein-tyrosine kinase MPK-2) (p50CSK) - Mus musculus (Mouse)                                         | 51094  | 0 | 18 | 0 | 7  |
| Q9CSP9 | Tetratricopeptide repeat protein 14 (TPR repeat protein 14) - Mus musculus (Mouse)                                                                               | 87252  | 0 | 18 | 0 | 16 |
| Q8R368 | Dyslexia susceptibility 1 candidate gene 1 protein homolog - Mus musculus (Mouse)                                                                                | 48552  | 0 | 18 | 0 | 2  |
| Q80YA9 | Connector enhancer of kinase suppressor of ras 2 (Connector enhancer of KSR2) (CNK2) - Mus musculus (Mouse)                                                      | 118463 | 0 | 18 | 0 | 15 |
| Q5XG71 | Small subunit processome component 20 homolog (Down-regulated in metastasis protein) - Mus musculus (Mouse)                                                      | 320222 | 0 | 18 | 0 | 18 |
| Q9CR88 | Mitochondrial 28S ribosomal protein S14 (S14mt) (MRP-S14) - Mus musculus (Mouse)                                                                                 | 15025  | 0 | 18 | 0 | 5  |
| Q9D3E6 | Cohesin subunit SA-1 (Stromal antigen 1) (SCC3 homolog 1) - Mus musculus (Mouse)                                                                                 | 145537 | 0 | 18 | 0 | 18 |
| P60469 | Liprin-alpha-3 (Protein tyrosine phosphatase receptor type f polypeptide-interacting protein alpha-3) (PTPRF-interacting protein alpha-3) - Mus musculus (Mouse) | 116664 | 0 | 18 | 0 | 16 |
| Q35250 | Exocyst complex component 7 (Exocyst complex component Exo70) - Mus musculus (Mouse)                                                                             | 80139  | 0 | 18 | 0 | 16 |
| Q3UHC7 | Disabled homolog 2-interacting protein (DAB2-interacting protein) - Mus musculus (Mouse)                                                                         | 132613 | 0 | 18 | 0 | 9  |
| Q9DBE9 | Putative rRNA methyltransferase 3 (EC 2.1.1.-) (rRNA (uridine-2~-O)-methyltransferase 3) - Mus musculus (Mouse)                                                  | 95873  | 0 | 18 | 0 | 18 |

|        |                                                                                                                                                                                                                                                       |        |   |    |   |    |
|--------|-------------------------------------------------------------------------------------------------------------------------------------------------------------------------------------------------------------------------------------------------------|--------|---|----|---|----|
| P35396 | Peroxisome proliferator-activated receptor delta (PPAR-delta) (PPAR-beta) (Nuclear hormone receptor 1) (NUC1) - Mus musculus (Mouse)                                                                                                                  | 50481  | 0 | 18 | 0 | 5  |
| Q8R2U7 | Leucine-rich repeat-containing protein 42 - Mus musculus (Mouse)                                                                                                                                                                                      | 48660  | 0 | 18 | 0 | 7  |
| Q571F8 | Glutaminase liver isoform, mitochondrial precursor (EC 3.5.1.2) (GLS) (L-glutamine amidohydrolase) (L-glutaminase) - Mus musculus (Mouse)                                                                                                             | 67178  | 0 | 18 | 0 | 6  |
| Q9Z148 | Histone-lysine N-methyltransferase, H3 lysine-9 specific 3 (EC 2.1.1.43) (Histone H3-K9 methyltransferase 3) (H3-K9-HMTase 3) (Euchromatic histone-lysine N-methyltransferase 2) (HLA-B-associated transcript 8) (Protein G9a) - Mus musculus (Mouse) | 140404 | 0 | 18 | 0 | 7  |
| Q6PG04 | Coiled-coil domain-containing protein 82 - Mus musculus (Mouse)                                                                                                                                                                                       | 61484  | 0 | 18 | 0 | 9  |
| Q8K2Y9 | Malcavernin (Cerebral cavernous malformations protein 2 homolog) (Osmosensing scaffold for MEKK3) - Mus musculus (Mouse)                                                                                                                              | 50342  | 0 | 18 | 0 | 5  |
| P17710 | Hexokinase-1 (EC 2.7.1.1) (Hexokinase type I) (HK I) (Hexokinase, tumor isozyme) - Mus musculus (Mouse)                                                                                                                                               | 109544 | 0 | 18 | 0 | 13 |
| Q4PZA2 | Endothelin-converting enzyme 1 (EC 3.4.24.71) (ECE-1) - Mus musculus (Mouse)                                                                                                                                                                          | 87815  | 0 | 18 | 0 | 12 |
| Q8K268 | ATP-binding cassette sub-family F member 3 - Mus musculus (Mouse)                                                                                                                                                                                     | 80214  | 0 | 18 | 0 | 7  |

|        |                                                                                                                                                                                                                                                                       |        |   |    |   |    |
|--------|-----------------------------------------------------------------------------------------------------------------------------------------------------------------------------------------------------------------------------------------------------------------------|--------|---|----|---|----|
| Q91WG8 | Bifunctional UDP-N-acetylglucosamine 2-epimerase/N-acetylmannosamine kinase (UDP-GlcNAc-2-epimerase/ManAc kinase) [Includes: UDP-N-acetylglucosamine 2-epimerase (EC 5.1.3.14) (Uridine diphosphate-N-acetylglucosamine-2-epimerase) (UDP-GlcNAc-2-epimer             | 80174  | 0 | 18 | 0 | 9  |
| Q80V94 | AP-4 complex subunit epsilon-1 (Adapter-related protein complex 4 epsilon-1 subunit) (Epsilon subunit of AP-4) (AP-4 adapter complex epsilon subunit) - Mus musculus (Mouse)                                                                                          | 125867 | 0 | 18 | 0 | 15 |
| Q8BGT9 | Polypeptide N-acetylgalactosaminyltransferase 12 (EC 2.4.1.41) (Protein-UDP acetylgalactosaminyltransferase 12) (UDP-GalNAc:polypeptide N-acetylgalactosaminyltransferase 12) (Polypeptide GalNAc transferase 12) (GalNAc-T12) (pp-GaNTase 12) - Mus musculus (Mouse) | 67354  | 0 | 18 | 0 | 10 |
| Q8CFC7 | Splicing factor, arginine/serine-rich 16 (Suppressor of white-apricot homolog 2) (Clk4-associating SR-related protein) - Mus musculus (Mouse)                                                                                                                         | 75004  | 0 | 18 | 0 | 6  |
| Q6PDZ2 | TATA box-binding protein-associated factor RNA polymerase I subunit C (TATA box-binding protein-associated factor 1C) (TBP-associated factor 1C) (TBP-associated factor RNA polymerase I 95 kDa) (TAFI95) - Mus musculus (Mouse)                                      | 92707  | 0 | 18 | 0 | 8  |
| Q3TQB2 | FAD-dependent oxidoreductase domain-containing protein 1 - Mus musculus (Mouse)                                                                                                                                                                                       | 54486  | 0 | 18 | 0 | 5  |
| P01674 | Ig kappa chain V-III region PC 2154 - Mus musculus (Mouse)                                                                                                                                                                                                            | 11806  | 0 | 18 | 0 | 6  |

|        |                                                                                                                                                                                                                   |        |   |    |   |    |
|--------|-------------------------------------------------------------------------------------------------------------------------------------------------------------------------------------------------------------------|--------|---|----|---|----|
| Q9CQQ4 | Survival of motor neuron protein-interacting protein 1 (SMN-interacting protein 1) (Component of gems 2) (Gemin-2) - Mus musculus (Mouse)                                                                         | 30878  | 0 | 18 | 0 | 8  |
| Q65CL1 | Catenin alpha-3 (Alpha T-catenin) (Cadherin-associated protein) - Mus musculus (Mouse)                                                                                                                            | 100652 | 0 | 18 | 0 | 15 |
| O88874 | Cyclin-K - Mus musculus (Mouse)                                                                                                                                                                                   | 61736  | 0 | 18 | 0 | 6  |
| Q61012 | Guanine nucleotide-binding protein G(T) gamma-T1 subunit precursor (Transducin gamma chain) - Mus musculus (Mouse)                                                                                                | 8693   | 0 | 18 | 0 | 1  |
| P97438 | Potassium channel subfamily K member 2 (Outward rectifying potassium channel protein TREK-1) (Two-pore potassium channel TPKC1) (TREK-1 K(+) channel subunit) - Mus musculus (Mouse)                              | 45554  | 0 | 18 | 0 | 1  |
| Q7TMA4 | G-protein coupled receptor 120 (G-protein coupled receptor GT01) - Mus musculus (Mouse)                                                                                                                           | 41300  | 0 | 18 | 0 | 2  |
| Q3UA37 | Glutamine-rich protein 1 - Mus musculus (Mouse)                                                                                                                                                                   | 86958  | 0 | 18 | 0 | 23 |
| Q9QYB8 | Beta-adducin (Erythrocyte adducin subunit beta) (Add97) - Mus musculus (Mouse)                                                                                                                                    | 81047  | 0 | 18 | 0 | 18 |
| Q9Z0N2 | Eukaryotic translation initiation factor 2 subunit 3, Y-linked (Eukaryotic translation initiation factor 2 subunit gamma, Y-linked) (eIF-2-gamma Y) - Mus musculus (Mouse)                                        | 51668  | 0 | 18 | 0 | 6  |
| Q8C7G5 | Apolipoprotein A-V precursor (Apolipoprotein A5) (ApoAV) (ApoA-V) (Regeneration-associated protein 3) - Mus musculus (Mouse)                                                                                      | 41294  | 0 | 18 | 0 | 4  |
| Q8R2K7 | snRNA-activating protein complex subunit 5 (SNAPc subunit 5) (snRNA-activating protein complex 19 kDa subunit) (SNAPc 19 kDa subunit) (Small nuclear RNA-activating complex polypeptide 5) - Mus musculus (Mouse) | 11390  | 0 | 18 | 0 | 10 |

|        |                                                                                                                                                                                                       |        |   |    |   |    |
|--------|-------------------------------------------------------------------------------------------------------------------------------------------------------------------------------------------------------|--------|---|----|---|----|
| Q8BGA5 | KRR1 small subunit processome component homolog (HIV-1 Rev-binding protein 2 homolog) - Mus musculus (Mouse)                                                                                          | 43739  | 0 | 18 | 0 | 6  |
| Q923Z3 | Protein MTO1 homolog, mitochondrial precursor - Mus musculus (Mouse)                                                                                                                                  | 74855  | 0 | 18 | 0 | 18 |
| P35802 | Neuronal membrane glycoprotein M6-a (M6a) - Mus musculus (Mouse)                                                                                                                                      | 31870  | 0 | 18 | 0 | 1  |
| Q8C9S4 | Uncharacterized protein C10orf118 homolog (Oocyte-testis gene 1 protein) - Mus musculus (Mouse)                                                                                                       | 105635 | 0 | 18 | 0 | 50 |
| P97481 | Endothelial PAS domain-containing protein 1 (EPAS-1) (Hypoxia-inducible factor 2 alpha) (HIF-2 alpha) (HIF2 alpha) (HIF-1 alpha-like factor) (MHLF) (HIF-related factor) (HRF) - Mus musculus (Mouse) | 97847  | 0 | 18 | 0 | 11 |
| Q80Y61 | Brain-specific angiogenesis inhibitor 1-associated protein 2-like protein 2 (BAI1-associated protein 2-like protein 2) - Mus musculus (Mouse)                                                         | 58479  | 0 | 18 | 0 | 16 |
| Q9CQ36 | DNA polymerase epsilon subunit 4 (EC 2.7.7.7) (DNA polymerase II subunit 4) (DNA polymerase epsilon subunit p12) - Mus musculus (Mouse)                                                               | 12346  | 0 | 18 | 0 | 5  |
| P19785 | Estrogen receptor (ER) (Estradiol receptor) (ER-alpha) - Mus musculus (Mouse)                                                                                                                         | 67653  | 0 | 18 | 0 | 6  |
| Q9JLF6 | Protein-glutamine gamma-glutamyltransferase K (EC 2.3.2.13) (Transglutaminase K) (TGase K) (TGK) (TG(K)) (Transglutaminase-1) (Epidermal TGase) - Mus musculus (Mouse)                                | 90682  | 0 | 18 | 0 | 8  |
| Q6VYH9 | Hematopoietic SH2 domain-containing protein (Hematopoietic SH2 protein) (Adaptor in lymphocytes of unknown function X) - Mus musculus (Mouse)                                                         | 37609  | 0 | 18 | 0 | 4  |
| Q3UMG5 | Leucine-rich repeat and calponin homology domain-containing protein 2 - Mus musculus (Mouse)                                                                                                          | 85734  | 0 | 18 | 0 | 5  |

|        |                                                                                                                                                                                    |        |   |    |   |    |
|--------|------------------------------------------------------------------------------------------------------------------------------------------------------------------------------------|--------|---|----|---|----|
| Q3UHK1 | Proton myo-inositol cotransporter (H(+)-myo-inositol cotransporter) (Hmit) - Mus musculus (Mouse)                                                                                  | 67720  | 0 | 18 | 0 | 5  |
| Q8K1L0 | cAMP response element-binding protein 5 (CRE-BPa) - Mus musculus (Mouse)                                                                                                           | 40158  | 0 | 18 | 0 | 6  |
| Q80X73 | Protein pelota homolog - Mus musculus (Mouse)                                                                                                                                      | 43794  | 0 | 18 | 0 | 37 |
| Q3UHF7 | Human immunodeficiency virus type I enhancer-binding protein 2 homolog (Myc intron-binding protein 1) (MIBP-1) - Mus musculus (Mouse)                                              | 268590 | 0 | 18 | 0 | 12 |
| O35719 | DNA repair protein RAD51 homolog 2 (R51H2) (RAD51-like protein 1) - Mus musculus (Mouse)                                                                                           | 38755  | 0 | 18 | 0 | 16 |
| Q8CDV0 | Uncharacterized protein C18orf34 homolog - Mus musculus (Mouse)                                                                                                                    | 103669 | 0 | 18 | 0 | 20 |
| Q61578 | NADPH:adrenodoxin oxidoreductase, mitochondrial precursor (EC 1.18.1.2) (Adrenodoxin reductase) (AR) (Ferredoxin reductase) (Ferredoxin--NADP(+) reductase) - Mus musculus (Mouse) | 54568  | 0 | 18 | 0 | 6  |
| Q9WV27 | Sodium/potassium-transporting ATPase alpha-4 chain (EC 3.6.3.9) (Sodium pump 4) (Na(+)/K(+) ATPase 4) - Mus musculus (Mouse)                                                       | 115940 | 0 | 18 | 0 | 15 |
| Q9QYY0 | GRB2-associated-binding protein 1 (GRB2-associated binder 1) - Mus musculus (Mouse)                                                                                                | 77449  | 0 | 18 | 0 | 3  |
| Q9D0F4 | NF-kappa-B-activating protein - Mus musculus (Mouse)                                                                                                                               | 47370  | 0 | 18 | 0 | 3  |
| P48999 | Arachidonate 5-lipoxygenase (EC 1.13.11.34) (5-lipoxygenase) (5-LO) - Mus musculus (Mouse)                                                                                         | 78634  | 0 | 17 | 0 | 8  |
| O70325 | Phospholipid hydroperoxide glutathione peroxidase, mitochondrial precursor (EC 1.11.1.12) (PHGPx) (GPX-4) - Mus musculus (Mouse)                                                   | 22794  | 0 | 17 | 0 | 3  |

|        |                                                                                                                                                     |        |   |    |   |    |
|--------|-----------------------------------------------------------------------------------------------------------------------------------------------------|--------|---|----|---|----|
| Q88508 | DNA (cytosine-5)-methyltransferase 3A (EC 2.1.1.37) (Dnmt3a) (DNA methyltransferase MmullIA) (DNA MTase MmullIA) (M.MmullIA) - Mus musculus (Mouse) | 103204 | 0 | 17 | 0 | 17 |
| Q9DCN1 | Peroxisomal NADH pyrophosphatase NUDT12 (EC 3.6.1.22) (Nucleoside diphosphate-linked moiety X motif 12) (Nudix motif 12) - Mus musculus (Mouse)     | 52162  | 0 | 17 | 0 | 9  |
| Q62245 | Son of sevenless homolog 1 (SOS-1) (mSOS-1) - Mus musculus (Mouse)                                                                                  | 151758 | 0 | 17 | 0 | 24 |
| Q02384 | Son of sevenless homolog 2 (SOS-2) (mSOS-2) - Mus musculus (Mouse)                                                                                  | 154398 | 0 | 17 | 0 | 16 |
| Q8R3H9 | Tetratricopeptide repeat protein 4 (TPR repeat protein 4) - Mus musculus (Mouse)                                                                    | 44767  | 0 | 17 | 0 | 6  |
| Q8BKC8 | Phosphatidylinositol 4-kinase beta (EC 2.7.1.67) (PtdIns 4-kinase beta) (PI4Kbeta) (PI4K-beta) - Mus musculus (Mouse)                               | 90585  | 0 | 17 | 0 | 6  |
| P10417 | Apoptosis regulator Bcl-2 - Mus musculus (Mouse)                                                                                                    | 26579  | 0 | 17 | 0 | 4  |
| Q55013 | Trafficking protein particle complex subunit 3 (BET3 homolog) - Mus musculus (Mouse)                                                                | 20460  | 0 | 17 | 0 | 3  |
| Q8BH57 | WD repeat protein 48 - Mus musculus (Mouse)                                                                                                         | 76815  | 0 | 17 | 0 | 6  |
| Q9CR00 | 26S proteasome non-ATPase regulatory subunit 9 (26S proteasome regulatory subunit p27) - Mus musculus (Mouse)                                       | 24876  | 0 | 17 | 0 | 4  |
| Q8K010 | 5-oxoprolinase (EC 3.5.2.9) (5-oxo-L-prolinase) (Pyroglutamase) (5-OPase) - Mus musculus (Mouse)                                                    | 138950 | 0 | 17 | 0 | 11 |
| P20917 | Myelin-associated glycoprotein precursor (Siglec-4a) - Mus musculus (Mouse)                                                                         | 70071  | 0 | 17 | 0 | 10 |
| P23804 | Ubiquitin-protein ligase E3 Mdm2 (EC 6.3.2.-) (p53-binding protein Mdm2) (Oncoprotein Mdm2) (Double minute 2 protein) - Mus musculus (Mouse)        | 55479  | 0 | 17 | 0 | 3  |



|        |                                                                                                                                                                                                  |        |   |    |   |    |
|--------|--------------------------------------------------------------------------------------------------------------------------------------------------------------------------------------------------|--------|---|----|---|----|
| P84309 | Adenylate cyclase type 5 (EC 4.6.1.1) (Adenylate cyclase type V) (ATP pyrophosphate-lyase 5) (Adenylyl cyclase 5) - Mus musculus (Mouse)                                                         | 140914 | 0 | 17 | 0 | 9  |
| Q8K083 | Zinc finger protein 536 - Mus musculus (Mouse)                                                                                                                                                   | 143254 | 0 | 17 | 0 | 12 |
| Q9DBC3 | Protein KIAA0082 - Mus musculus (Mouse)                                                                                                                                                          | 96641  | 0 | 17 | 0 | 15 |
| P59530 | Taste receptor type 2 member 7 (T2R7) (T2R6) (T2R30) (STC7-4) (mT2R42) - Mus musculus (Mouse)                                                                                                    | 36056  | 0 | 17 | 0 | 3  |
| Q60931 | Voltage-dependent anion-selective channel protein 3 (VDAC-3) (mVDAC3) (Outer mitochondrial membrane protein porin 3) - Mus musculus (Mouse)                                                      | 31076  | 0 | 17 | 0 | 2  |
| Q8K4P1 | Neuropeptide B precursor (Preproprotein L7) (mPPL7) [Contains: Neuropeptide B-29 (NPB29) (L7C)] - Mus musculus (Mouse)                                                                           | 13295  | 0 | 17 | 0 | 2  |
| P35419 | Thyroid peroxidase precursor (EC 1.11.1.8) (TPO) - Mus musculus (Mouse)                                                                                                                          | 102988 | 0 | 17 | 0 | 6  |
| Q9DBJ6 | Josephin-1 (Josephin domain-containing protein 1) - Mus musculus (Mouse)                                                                                                                         | 23422  | 0 | 17 | 0 | 4  |
| Q9WV06 | Ankyrin repeat domain-containing protein 2 (Skeletal muscle ankyrin repeat protein) (mArpp) - Mus musculus (Mouse)                                                                               | 36855  | 0 | 17 | 0 | 8  |
| Q99K10 | Aconitate hydratase, mitochondrial precursor (EC 4.2.1.3) (Citrate hydro-lyase) (Aconitase) - Mus musculus (Mouse)                                                                               | 86151  | 0 | 17 | 0 | 7  |
| Q9QZQ1 | Afadin (Protein Af-6) (Fragment) Mus musculus (Mouse)                                                                                                                                            | 101095 | 0 | 17 | 0 | 7  |
| Q60902 | Epidermal growth factor receptor substrate 15-like 1 (Eps15-related protein) (Eps15R) (Epidermal growth factor receptor pathway substrate 15-related sequence) (Eps15-rs) - Mus musculus (Mouse) | 99405  | 0 | 17 | 0 | 8  |

|        |                                                                                                                                                                                                                          |        |   |    |   |    |
|--------|--------------------------------------------------------------------------------------------------------------------------------------------------------------------------------------------------------------------------|--------|---|----|---|----|
| P70362 | Ubiquitin fusion degradation protein 1 homolog (UB fusion protein 1) - Mus musculus (Mouse)                                                                                                                              | 34747  | 0 | 17 | 0 | 2  |
| Q920R6 | Vacuolar proton translocating ATPase 116 kDa subunit a isoform 4 (V-ATPase 116 kDa isoform a4) (Vacuolar proton translocating ATPase 116 kDa subunit a kidney isoform) - Mus musculus (Mouse)                            | 96341  | 0 | 17 | 0 | 13 |
| Q8BW49 | Tetratricopeptide repeat protein 12 (TPR repeat protein 12) - Mus musculus (Mouse)                                                                                                                                       | 79901  | 0 | 17 | 0 | 10 |
| Q9JKX3 | Transferrin receptor protein 2 (TfR2) - Mus musculus (Mouse)                                                                                                                                                             | 88689  | 0 | 17 | 0 | 7  |
| P27048 | Small nuclear ribonucleoprotein-associated protein B (snRNP-B) (Sm protein B) (Sm-B) (SmB) - Mus musculus (Mouse)                                                                                                        | 23811  | 0 | 17 | 0 | 7  |
| Q9EPE9 | Probable cation-transporting ATPase 13A1 (EC 3.6.3.-) (CATP) - Mus musculus (Mouse)                                                                                                                                      | 133947 | 0 | 17 | 0 | 6  |
| Q7TPH6 | Probable E3 ubiquitin-protein ligase MYCBP2 (EC 6.3.2.-) (Myc-binding protein 2) (Protein associated with Myc) (Pam/highwire/rpm-1 protein) - Mus musculus (Mouse)                                                       | 525562 | 0 | 17 | 0 | 56 |
| Q9EPW2 | Krüppel-like factor 15 (Cardiovascular Krüppel-like factor) - Mus musculus (Mouse)                                                                                                                                       | 45023  | 0 | 17 | 0 | 7  |
| Q80UJ7 | Rab3 GTPase-activating protein catalytic subunit (RAB3 GTPase-activating protein 130 kDa subunit) (Rab3-GAP p130) (Rab3-GAP) - Mus musculus (Mouse)                                                                      | 111283 | 0 | 17 | 0 | 9  |
| Q6DTY7 | 6-phosphofructo-2-kinase/fructose-2,6-bisphosphatase 4 (6PF-2-K/Fru-2,6-P2ASE testis-type isozyme) [Includes: 6-phosphofructo-2-kinase (EC 2.7.1.105); Fructose-2,6-bisphosphatase (EC 3.1.3.46)] - Mus musculus (Mouse) | 54660  | 0 | 17 | 0 | 5  |

|        |                                                                                                                                                                                                                                                           |        |   |    |   |    |
|--------|-----------------------------------------------------------------------------------------------------------------------------------------------------------------------------------------------------------------------------------------------------------|--------|---|----|---|----|
| P47739 | Aldehyde dehydrogenase, dimeric NADP-preferring (EC 1.2.1.5) (ALDH class 3) (Dioxin-inducible aldehyde dehydrogenase 3) - Mus musculus (Mouse)                                                                                                            | 50834  | 0 | 17 | 0 | 5  |
| O09158 | Cytochrome P450 3A25 (EC 1.14.14.1) (CYP11A25) - Mus musculus (Mouse)                                                                                                                                                                                     | 58369  | 0 | 17 | 0 | 20 |
| Q9JIT0 | Limb region 1 protein - Mus musculus (Mouse)                                                                                                                                                                                                              | 55592  | 0 | 17 | 0 | 4  |
| Q8VEG0 | Coiled-coil domain-containing protein 71 - Mus musculus (Mouse)                                                                                                                                                                                           | 46323  | 0 | 17 | 0 | 5  |
| Q9ERB0 | Synaptosomal-associated protein 29 (SNAP-29) (Vesicle-membrane fusion protein SNAP-29) (Soluble 29 kDa NSF attachment protein) (Golgi SNARE of 32 kDa) (Gs32) - Mus musculus (Mouse)                                                                      | 29554  | 0 | 17 | 0 | 11 |
| O55143 | Sarcoplasmic/endoplasmic reticulum calcium ATPase 2 (EC 3.6.3.8) (Calcium pump 2) (SERCA2) (SR Ca(2+)-ATPase 2) (Calcium-transporting ATPase sarcoplasmic reticulum type, slow twitch skeletal muscle isoform) (Endoplasmic reticulum class 1/2 Ca(2+) AT | 116437 | 0 | 17 | 0 | 19 |
| Q69ZS7 | HBS1-like protein - Mus musculus (Mouse)                                                                                                                                                                                                                  | 75624  | 0 | 17 | 0 | 12 |
| P54987 | Immune-responsive protein 1 - Mus musculus (Mouse)                                                                                                                                                                                                        | 54010  | 0 | 17 | 0 | 8  |
| Q9D711 | Pirin - Mus musculus (Mouse)                                                                                                                                                                                                                              | 32160  | 0 | 17 | 0 | 18 |
| P97318 | Disabled homolog 1 - Mus musculus (Mouse)                                                                                                                                                                                                                 | 63823  | 0 | 17 | 0 | 1  |
| P27889 | Hepatocyte nuclear factor 1-beta (HNF-1beta) (HNF-1B) (Variant hepatic nuclear factor 1) (VHNF1) (Homeoprotein LFB3) - Mus musculus (Mouse)                                                                                                               | 61778  | 0 | 17 | 0 | 4  |
| Q80TB7 | Zinc finger SWIM domain-containing protein 6 (Fragment) - Mus musculus (Mouse)                                                                                                                                                                            | 116410 | 0 | 17 | 0 | 5  |
| P29477 | Nitric oxide synthase, inducible (EC 1.14.13.39) (NOS type II) (Inducible NO synthase) (Inducible NOS) (iNOS) (Macrophage NOS) (MAC-NOS) Mus musculus (Mouse)                                                                                             | 131861 | 0 | 17 | 0 | 18 |

|        |                                                                                                                                                                                                  |        |   |    |   |    |
|--------|--------------------------------------------------------------------------------------------------------------------------------------------------------------------------------------------------|--------|---|----|---|----|
| P97324 | Glucose-6-phosphate 1-dehydrogenase 2 (EC 1.1.1.49) (G6PD) - Mus musculus (Mouse)                                                                                                                | 59601  | 0 | 17 | 0 | 7  |
| Q8JZL1 | Interleukin-17 receptor D precursor (IL-17 receptor D) (IL-17RD) (Interleukin-17D receptor) (IL-17D receptor) (Interleukin-17 receptor-like protein) (Sef homolog) (mSef) - Mus musculus (Mouse) | 83721  | 0 | 17 | 0 | 5  |
| P97490 | Adenylate cyclase type 8 (EC 4.6.1.1) (Adenylate cyclase type VIII) (ATP pyrophosphate-lyase 8) (Adenylyl cyclase 8) (Ca(2+)/calmodulin-activated adenylyl cyclase) - Mus musculus (Mouse)       | 141492 | 0 | 17 | 0 | 8  |
| Q8VDJ3 | Vigilin (High density lipoprotein-binding protein) (HDL-binding protein) - Mus musculus (Mouse)                                                                                                  | 142225 | 0 | 17 | 0 | 19 |
| Q91W50 | Cold shock domain-containing protein E1 - Mus musculus (Mouse)                                                                                                                                   | 89590  | 0 | 17 | 0 | 18 |
| Q8BIQ3 | Zinc finger protein 2 (Zinc finger protein 661) (Zfp-661) - Mus musculus (Mouse)                                                                                                                 | 49863  | 0 | 17 | 0 | 11 |
| P08043 | Zinc finger protein 2 (Zfp-2) (Protein mKR2) - Mus musculus (Mouse)                                                                                                                              | 41027  | 0 | 17 | 0 | 6  |
| Q8R179 | Kelch repeat and BTB domain-containing protein 4 (BTB and kelch domain-containing protein 4) - Mus musculus (Mouse)                                                                              | 60731  | 0 | 17 | 0 | 4  |
| Q02525 | Zinc finger protein 39 (Zfp-39) (CtFIN33) - Mus musculus (Mouse)                                                                                                                                 | 86393  | 0 | 17 | 0 | 5  |
| Q99MD8 | Myoneurin - Mus musculus (Mouse)                                                                                                                                                                 | 69975  | 0 | 17 | 0 | 2  |
| Q9Z2D7 | Methyl-CpG-binding domain protein 4 (EC 3.2.2.-) (Methyl-CpG-binding protein MBD4) (Mismatch-specific DNA N-glycosylase) - Mus musculus (Mouse)                                                  | 63052  | 0 | 17 | 0 | 14 |
| Q6PIC6 | Sodium/potassium-transporting ATPase alpha-3 chain (EC 3.6.3.9) (Sodium pump 3) (Na(+)/K(+) ATPase 3) (Alpha(III)) - Mus musculus (Mouse)                                                        | 113045 | 0 | 17 | 0 | 16 |

|        |                                                                                                                                                                                                                                                           |        |   |    |   |    |
|--------|-----------------------------------------------------------------------------------------------------------------------------------------------------------------------------------------------------------------------------------------------------------|--------|---|----|---|----|
| Q8VDN2 | Sodium/potassium-transporting ATPase alpha-1 chain precursor (EC 3.6.3.9) (Sodium pump 1) (Na(+)/K(+) ATPase 1) - Mus musculus (Mouse)                                                                                                                    | 114221 | 0 | 17 | 0 | 31 |
| Q61025 | Intraflagellar transport 20 homolog (Intraflagellar transport protein 20) (mIFT20) - Mus musculus (Mouse)                                                                                                                                                 | 15341  | 0 | 17 | 0 | 2  |
| P59328 | WD repeat and HMG-box DNA-binding protein 1 (Acidic nucleoplasmic DNA-binding protein 1) (And-1) - Mus musculus (Mouse)                                                                                                                                   | 125887 | 0 | 17 | 0 | 16 |
| Q8CIZ8 | von Willebrand factor precursor (vWF) [Contains: von Willebrand antigen 2 (von Willebrand antigen II)] - Mus musculus (Mouse)                                                                                                                             | 322349 | 0 | 17 | 0 | 17 |
| Q9JK81 | UPF0160 protein MYG1 (Protein Gamm1) - Mus musculus (Mouse)                                                                                                                                                                                               | 43095  | 0 | 17 | 0 | 7  |
| Q8C0D0 | Probable tRNA pseudouridine synthase 1 (EC 5.4.99.-) - Mus musculus (Mouse)                                                                                                                                                                               | 36553  | 0 | 17 | 0 | 6  |
| Q8CEC0 | Nuclear pore complex protein Nup88 (Nucleoporin Nup88) (88 kDa nuclear pore complex protein) - Mus musculus (Mouse)                                                                                                                                       | 86138  | 0 | 17 | 0 | 24 |
| Q8K2I3 | Dimethylaniline monooxygenase [N-oxide-forming] 2 (EC 1.14.13.8) (Pulmonary flavin-containing monooxygenase 2) (FMO 2) (Dimethylaniline oxidase 2) - Mus musculus (Mouse)                                                                                 | 61392  | 0 | 17 | 0 | 8  |
| O35732 | CASP8 and FADD-like apoptosis regulator precursor (Cellular FLICE-like inhibitory protein) (c-FLIP) (Caspase-eight-related protein) (Casper) (Caspase-like apoptosis regulatory protein) (CLARP) (MACH-related inducer of toxicity) (MRIT) (Caspase homol | 55724  | 0 | 17 | 0 | 8  |

|        |                                                                                                                                                                                               |        |   |    |   |    |
|--------|-----------------------------------------------------------------------------------------------------------------------------------------------------------------------------------------------|--------|---|----|---|----|
| P70340 | Mothers against decapentaplegic homolog 1 (SMAD 1) (Mothers against DPP homolog 1) (Mad-related protein 1) (Mothers-against-DPP-related 1) (mMad1) (Dwarfin-A) (Dwf-A) - Mus musculus (Mouse) | 52884  | 0 | 17 | 0 | 8  |
| Q35082 | Klotho precursor (EC 3.2.1.31) [Contains: Klotho peptide] - Mus musculus (Mouse)                                                                                                              | 117036 | 0 | 17 | 0 | 30 |
| Q9JM61 | Thrombospondin type-1 domain-containing protein 1 precursor (Transmembrane molecule with thrombospondin module) - Mus musculus (Mouse)                                                        | 96004  | 0 | 17 | 0 | 5  |
| Q9D9C7 | Uncharacterized protein C3orf62 homolog - Mus musculus (Mouse)                                                                                                                                | 28916  | 0 | 17 | 0 | 6  |
| Q9JKT2 | Taste receptor type 2 member 119 (T2R119) (Taste receptor type 2 member 19) (T2R19) - Mus musculus (Mouse)                                                                                    | 38394  | 0 | 17 | 0 | 4  |
| P63082 | Vacuolar ATP synthase 16 kDa proteolipid subunit (EC 3.6.3.14) (PL16) - Mus musculus (Mouse)                                                                                                  | 15798  | 0 | 17 | 0 | 1  |
| Q88447 | Kinesin light chain 1 (KLC 1) - Mus musculus (Mouse)                                                                                                                                          | 61345  | 0 | 17 | 0 | 7  |
| Q88448 | Kinesin light chain 2 (KLC 2) - Mus musculus (Mouse)                                                                                                                                          | 67020  | 0 | 17 | 0 | 8  |
| Q9DA75 | Major facilitator superfamily domain-containing protein 2 - Mus musculus (Mouse)                                                                                                              | 59573  | 0 | 17 | 0 | 5  |
| Q9DD19 | Ras association domain-containing protein 7 - Mus musculus (Mouse)                                                                                                                            | 39735  | 0 | 17 | 0 | 7  |
| Q9R045 | Angiopoietin-related protein 2 precursor (Angiopoietin-like 2) - Mus musculus (Mouse)                                                                                                         | 57539  | 0 | 17 | 0 | 14 |
| Q3U128 | Protein APCDD1 precursor (Adenomatosis polyposis coli down-regulated 1 protein homolog) - Mus musculus (Mouse)                                                                                | 59342  | 0 | 17 | 0 | 5  |
| Q6PB44 | Tyrosine-protein phosphatase non-receptor type 23 (EC 3.1.3.48) - Mus musculus (Mouse)                                                                                                        | 185956 | 0 | 17 | 0 | 36 |

|        |                                                                                                                                                                               |        |   |    |   |    |
|--------|-------------------------------------------------------------------------------------------------------------------------------------------------------------------------------|--------|---|----|---|----|
| Q9QXX8 | Nuclear fragile X mental retardation-interacting protein 1 (Nuclear FMRP-interacting protein 1) - Mus musculus (Mouse)                                                        | 55078  | 0 | 17 | 0 | 16 |
| Q6A098 | Uncharacterized protein KIAA0256 - Mus musculus (Mouse)                                                                                                                       | 120593 | 0 | 17 | 0 | 13 |
| Q9Z0F1 | Neuroendocrine secretory protein 55 (NESP55) [Contains: LHAL tetrapeptide; GPIPIRRH peptide] - Mus musculus (Mouse)                                                           | 29511  | 0 | 17 | 0 | 2  |
| Q8BMT4 | Leucine-rich repeat-containing protein 33 precursor - Mus musculus (Mouse)                                                                                                    | 78117  | 0 | 17 | 0 | 5  |
| Q91YM2 | Glucocorticoid receptor DNA-binding factor 1 - Mus musculus (Mouse)                                                                                                           | 171825 | 0 | 16 | 0 | 22 |
| Q9QY40 | Plexin-B3 precursor (Plexin-6) - Mus musculus (Mouse)                                                                                                                         | 210425 | 0 | 16 | 0 | 8  |
| Q5SSF7 | Protein FAM46C - Mus musculus (Mouse)                                                                                                                                         | 45225  | 0 | 16 | 0 | 3  |
| P56812 | Programmed cell death protein 5 (Protein TFAR19) (TF-1 cell apoptosis-related gene 19 protein) - Mus musculus (Mouse)                                                         | 14266  | 0 | 16 | 0 | 3  |
| O08710 | Thyroglobulin precursor - Mus musculus (Mouse)                                                                                                                                | 311333 | 0 | 16 | 0 | 15 |
| O35902 | Desmoglein-3 precursor (130 kDa pemphigus vulgaris antigen homolog) - Mus musculus (Mouse)                                                                                    | 109132 | 0 | 16 | 0 | 19 |
| P51830 | Adenylate cyclase type 9 (EC 4.6.1.1) (Adenylate cyclase type IX) (ATP pyrophosphate-lyase 9) (Adenylyl cyclase 9) (Adenylyl cyclase type 10) (ACTP10) - Mus musculus (Mouse) | 153081 | 0 | 16 | 0 | 8  |
| Q99ML1 | Bcl-2-binding component 3 (p53 up-regulated modulator of apoptosis) - Mus musculus (Mouse)                                                                                    | 20906  | 0 | 16 | 0 | 9  |

|        |                                                                                                                                                                                                                                  |        |   |    |   |    |
|--------|----------------------------------------------------------------------------------------------------------------------------------------------------------------------------------------------------------------------------------|--------|---|----|---|----|
| O08715 | A kinase anchor protein 1, mitochondrial precursor (Protein kinase A-anchoring protein 1) (PRKA1) (Dual specificity A-kinase-anchoring protein 1) (D-AKAP-1) (Spermatid A-kinase anchor protein) (S-AKAP) - Mus musculus (Mouse) | 93020  | 0 | 16 | 0 | 9  |
| Q8JZN5 | Acyl-CoA dehydrogenase family member 9, mitochondrial precursor (EC 1.3.99.-) (ACAD-9) - Mus musculus (Mouse)                                                                                                                    | 69177  | 0 | 16 | 0 | 11 |
| O55131 | Septin-7 (CDC10 protein homolog) - Mus musculus (Mouse)                                                                                                                                                                          | 50860  | 0 | 16 | 0 | 6  |
| Q9JIK5 | Nucleolar RNA helicase 2 (EC 3.6.1.-) (Nucleolar RNA helicase II) (Nucleolar RNA helicase Gu) (RH II/Gu) (Gu-alpha) (DEAD box protein 21) - Mus musculus (Mouse)                                                                 | 94151  | 0 | 16 | 0 | 16 |
| P97807 | Fumarate hydratase, mitochondrial precursor (EC 4.2.1.2) (Fumarase) (EF-3) - Mus musculus (Mouse)                                                                                                                                | 54564  | 0 | 16 | 0 | 14 |
| Q80UM3 | NMDA receptor-regulated protein 1 (N-terminal acetyltransferase 1) (Protein tubedown-1) - Mus musculus (Mouse)                                                                                                                   | 102208 | 0 | 16 | 0 | 18 |
| Q9D9X6 | Zinc finger SWIM domain-containing protein 2 - Mus musculus (Mouse)                                                                                                                                                              | 73514  | 0 | 16 | 0 | 8  |
| Q64267 | DNA-repair protein complementing XP-A cells homolog (Xeroderma pigmentosum group A-complementing protein homolog) - Mus musculus (Mouse)                                                                                         | 31778  | 0 | 16 | 0 | 5  |
| Q80V62 | Fanconi anemia group D2 protein homolog (Protein FACD2) - Mus musculus (Mouse)                                                                                                                                                   | 165338 | 0 | 16 | 0 | 15 |
| P48437 | Homeobox prospero-like protein PROX1 (PROX 1) - Mus musculus (Mouse)                                                                                                                                                             | 83701  | 0 | 16 | 0 | 4  |
| Q9Z1J2 | Serine/threonine-protein kinase Nek4 (EC 2.7.11.1) (NimA-related protein kinase 4) (Serine/threonine-protein kinase 2) - Mus musculus (Mouse)                                                                                    | 89680  | 0 | 16 | 0 | 9  |



|        |                                                                                                                                                                                                                                                           |        |   |    |   |    |
|--------|-----------------------------------------------------------------------------------------------------------------------------------------------------------------------------------------------------------------------------------------------------------|--------|---|----|---|----|
| Q99J31 | Oligophrenin 1 - Mus musculus (Mouse)                                                                                                                                                                                                                     | 92554  | 0 | 16 | 0 | 14 |
| Q06770 | Corticosteroid-binding globulin precursor (CBG) (Transcortin) (Serp1n A6) - Mus musculus (Mouse)                                                                                                                                                          | 44911  | 0 | 16 | 0 | 5  |
| Q8BRE0 | Uncharacterized protein C1orf36 homolog - Mus musculus (Mouse)                                                                                                                                                                                            | 22826  | 0 | 16 | 0 | 21 |
| O35317 | Pre-B-cell leukemia transcription factor 3 (Homeobox protein PBX3) - Mus musculus (Mouse)                                                                                                                                                                 | 47459  | 0 | 16 | 0 | 9  |
| Q03391 | Glutamate [NMDA] receptor subunit epsilon 4 precursor (N-methyl D-aspartate receptor subtype 2D) (NR2D) (NMDAR2D) - Mus musculus (Mouse)                                                                                                                  | 144186 | 0 | 16 | 0 | 12 |
| O08848 | 60 kDa SS-A/Ro ribonucleoprotein (60 kDa Ro protein) (60 kDa ribonucleoprotein Ro) (RoRNP) (TROVE domain family member 2) - Mus musculus (Mouse)                                                                                                          | 60826  | 0 | 16 | 0 | 54 |
| Q91WP0 | Mannan-binding lectin serine protease 2 precursor (EC 3.4.21.104) (Mannose-binding protein-associated serine protease 2) (MASP-2) (MBL-associated serine protease 2) [Contains: Mannan-binding lectin serine protease 2 A chain; Mannan-binding lectin se | 76950  | 0 | 16 | 0 | 8  |
| O54863 | Testis-specific serine/threonine-protein kinase 2 (EC 2.7.11.1) (TSSK-2) (Testis-specific kinase 2) (TSK-2) (Serine/threonine-protein kinase 22B) - Mus musculus (Mouse)                                                                                  | 41110  | 0 | 16 | 0 | 4  |
| P97772 | Metabotropic glutamate receptor 1 precursor (mGluR1) - Mus musculus (Mouse)                                                                                                                                                                               | 135008 | 0 | 16 | 0 | 15 |
| P58006 | Sestrin-1 (p53-regulated protein PA26) - Mus musculus (Mouse)                                                                                                                                                                                             | 57254  | 0 | 16 | 0 | 13 |
| O35594 | Intraflagellar transport 81 (Carnitine deficiency-associated protein expressed in ventricle 1) (CDV-1 protein) - Mus musculus (Mouse)                                                                                                                     | 79692  | 0 | 16 | 0 | 18 |

|        |                                                                                                                                                                                                                                                           |        |   |    |   |    |
|--------|-----------------------------------------------------------------------------------------------------------------------------------------------------------------------------------------------------------------------------------------------------------|--------|---|----|---|----|
| Q8BJL0 | SWI/SNF-related matrix-associated actin-dependent regulator of chromatin subfamily A-like protein 1 (EC 3.6.1.-) (Sucrose nonfermenting protein 2-like 1) (HepA-related protein) (mharp) - Mus musculus (Mouse)                                           | 101347 | 0 | 16 | 0 | 5  |
| Q8BIV3 | Ran-binding protein 6 (RanBP6) - Mus musculus (Mouse)                                                                                                                                                                                                     | 126104 | 0 | 16 | 0 | 10 |
| O08832 | Polypeptide N-acetylgalactosaminyltransferase 4 (EC 2.4.1.41) (Protein-UDP acetylgalactosaminyltransferase 4) (UDP-GalNAc:polypeptide N-acetylgalactosaminyltransferase 4) (Polypeptide GalNAc transferase 4) (GalNAc-T4) (pp-GaNTase 4) - Mus musculus ( | 67368  | 0 | 16 | 0 | 4  |
| Q8VDZ4 | Probable palmitoyltransferase ZDHHC5 (EC 2.3.1.-) (Zinc finger DHH domain-containing protein 5) (DHH-5) - Mus musculus (Mouse)                                                                                                                            | 78193  | 0 | 16 | 0 | 3  |
| Q9Z1W4 | Growth/differentiation factor 11 precursor (GDF-11) (Bone morphogenetic protein 11) - Mus musculus (Mouse)                                                                                                                                                | 45659  | 0 | 16 | 0 | 5  |
| Q61136 | Serine/threonine-protein kinase PRP4 homolog (EC 2.7.11.1) (PRP4 pre-mRNA-processing factor 4 homolog) (Pre-mRNA protein kinase) - Mus musculus (Mouse)                                                                                                   | 117276 | 0 | 16 | 0 | 17 |
| O35474 | EGF-like repeat and discoidin I-like domain-containing protein 3 precursor (EGF-like repeats and discoidin I-like domains protein 3) (Developmentally-regulated endothelial cell locus 1 protein) (Integrin-binding protein DEL1) - Mus musculus (Mouse)  | 55074  | 0 | 16 | 0 | 5  |
| Q8K2Q2 | Glutathione transferase omega-2 (EC 2.5.1.18) - Mus musculus (Mouse)                                                                                                                                                                                      | 29436  | 0 | 16 | 0 | 2  |
| P97873 | Lysyl oxidase homolog 1 precursor (EC 1.4.3.-) (Lysyl oxidase-like protein 1) (Lysyl oxidase 2) - Mus musculus (Mouse)                                                                                                                                    | 67149  | 0 | 16 | 0 | 6  |

|        |                                                                                                                                                                                                             |        |   |    |   |    |
|--------|-------------------------------------------------------------------------------------------------------------------------------------------------------------------------------------------------------------|--------|---|----|---|----|
| O70318 | Band 4.1-like protein 2<br>(Generally expressed protein 4.1) (4.1G) - Mus musculus (Mouse)                                                                                                                  | 110280 | 0 | 16 | 0 | 14 |
| Q9ES00 | Ubiquitin conjugation factor E4 B<br>(Ubiquitin fusion degradation protein 2) (Ufd2a) - Mus musculus (Mouse)                                                                                                | 134530 | 0 | 16 | 0 | 5  |
| Q9QXE5 | Thymus-specific serine protease precursor (EC 3.4.-.-) (Serine protease 16) - Mus musculus (Mouse)                                                                                                          | 55059  | 0 | 16 | 0 | 2  |
| Q811B3 | ADAMTS-12 precursor (EC 3.4.24.-) (A disintegrin and metalloproteinase with thrombospondin motifs 12) (ADAM-TS 12) (ADAM-TS12) - Mus musculus (Mouse)                                                       | 182638 | 0 | 16 | 0 | 11 |
| Q8BHE3 | Caytaxin - Mus musculus (Mouse)                                                                                                                                                                             | 42323  | 0 | 16 | 0 | 2  |
| Q61495 | Desmoglein-1 alpha precursor (Dsg1-alpha) (Desmoglein-1) (Desmosomal glycoprotein I) (DG1) (DGI) - Mus musculus (Mouse)                                                                                     | 115551 | 0 | 16 | 0 | 7  |
| O35350 | Calpain-1 catalytic subunit (EC 3.4.22.52) (Calpain-1 large subunit) (Calcium-activated neutral proteinase 1) (CANP 1) (Calpain mu-type) (muCANP) (Micromolar-calpain) - Mus musculus (Mouse)               | 82739  | 0 | 16 | 0 | 12 |
| Q91YE8 | Synaptopodin-2 (Myopodin) - Mus musculus (Mouse)                                                                                                                                                            | 116968 | 0 | 16 | 0 | 31 |
| P49442 | Inositol polyphosphate 1-phosphatase (EC 3.1.3.57) (IPPase) (IPP) - Mus musculus (Mouse)                                                                                                                    | 43775  | 0 | 16 | 0 | 4  |
| Q6P2L6 | Histone-lysine N-methyltransferase NSD3 (EC 2.1.1.43) (Nuclear SET domain-containing protein 3) (WHSC1-like protein 1) (Wolf-Hirschhorn syndrome candidate 1-like protein 1 homolog) - Mus musculus (Mouse) | 164834 | 0 | 16 | 0 | 16 |
| Q9CZQ9 | Bardet-Biedl syndrome 5 protein homolog - Mus musculus (Mouse)                                                                                                                                              | 39009  | 0 | 16 | 0 | 4  |

|        |                                                                                                                                                                                                                                    |        |   |    |   |    |
|--------|------------------------------------------------------------------------------------------------------------------------------------------------------------------------------------------------------------------------------------|--------|---|----|---|----|
| O70293 | G protein-coupled receptor kinase 6 (EC 2.7.11.16) (G protein-coupled receptor kinase GRK6) - Mus musculus (Mouse)                                                                                                                 | 67134  | 0 | 16 | 0 | 14 |
| Q8VEB1 | G protein-coupled receptor kinase 5 (EC 2.7.11.16) (G protein-coupled receptor kinase GRK5) - Mus musculus (Mouse)                                                                                                                 | 68659  | 0 | 16 | 0 | 11 |
| O70291 | G protein-coupled receptor kinase 4 (EC 2.7.11.16) (G protein-coupled receptor kinase GRK4) - Mus musculus (Mouse)                                                                                                                 | 68009  | 0 | 16 | 0 | 9  |
| Q9WUV2 | Alpha-N-acetylgalactosaminide alpha-2,6-sialyltransferase 3 (EC 2.4.99.-) (GalNAc alpha-2,6-sialyltransferase III) (ST6GalNAc III) (Sialyltransferase 7C) (STY) -                                                                  | 35961  | 0 | 16 | 0 | 3  |
| Q9R1M5 | NACHT, LRR and PYD-containing protein 5 (Maternal antigen that embryos require) (Mater protein) (Ooplasm-specific protein 1) (OP1) - Mus musculus (Mouse)                                                                          | 127759 | 0 | 16 | 0 | 13 |
| P97464 | Exostosin-1 (EC 2.4.1.224) (EC 2.4.1.225) (Glucuronosyl-N-acetylglucosaminyl-proteoglycan/N-acetylglucosaminyl-proteoglycan 4-alpha-N-acetylglucosaminyltransferase) (Multiple exostoses protein 1 homolog) - Mus musculus (Mouse) | 86994  | 0 | 16 | 0 | 4  |
| P49429 | 4-hydroxyphenylpyruvate dioxygenase (EC 1.13.11.27) (4HPPD) (HPD) (4-hydroxyphenylpyruvic acid oxidase) (HPPDase) (F protein) (F Alloantigen) - Mus musculus (Mouse)                                                               | 45254  | 0 | 16 | 0 | 5  |
| Q9WU40 | Inner nuclear membrane protein Man1 (LEM domain-containing protein 3) (Fragment) - Mus musculus (Mouse)                                                                                                                            | 34631  | 0 | 16 | 0 | 5  |
| Q9DB20 | ATP synthase O subunit, mitochondrial precursor (EC 3.6.3.14) (Oligomycin sensitivity conferral protein) (OSCP) - Mus musculus (Mouse)                                                                                             | 23406  | 0 | 16 | 0 | 5  |

|        |                                                                                                                                                                                                                                                       |        |   |    |   |    |
|--------|-------------------------------------------------------------------------------------------------------------------------------------------------------------------------------------------------------------------------------------------------------|--------|---|----|---|----|
| Q88491 | Histone-lysine N-methyltransferase, H3 lysine-36 and H4 lysine-20 specific (EC 2.1.1.43) (H3-K36-HMTase) (H4-K20-HMTase) (Nuclear receptor-binding SET domain-containing protein 1) (NR-binding SET domain-containing protein) - Mus musculus (Mouse) | 289037 | 0 | 16 | 0 | 22 |
| Q921G8 | Gamma-tubulin complex component 2 (GCP-2) - Mus musculus (Mouse)                                                                                                                                                                                      | 103796 | 0 | 16 | 0 | 10 |
| Q9JL62 | Glycolipid transfer protein (GLTP) - Mus musculus (Mouse)                                                                                                                                                                                             | 23845  | 0 | 16 | 0 | 5  |
| Q9CX00 | Uncharacterized protein KIAA0174 - Mus musculus (Mouse)                                                                                                                                                                                               | 39615  | 0 | 16 | 0 | 3  |
| O35927 | Catenin delta-2 (Neural plakophilin-related ARM-repeat protein) (NPRAP) (Neurojungin) - Mus musculus (Mouse)                                                                                                                                          | 136000 | 0 | 16 | 0 | 15 |
| Q04592 | Proprotein convertase subtilisin/kexin type 5 precursor (EC 3.4.21.-) (Proprotein convertase PC5) (Subtilisin/kexin-like protease PC5) (PC6) (Subtilisin-like proprotein convertase 6) (SPC6) - Mus musculus (Mouse)                                  | 220210 | 0 | 16 | 0 | 7  |
| O88573 | AF4/FMR2 family member 1 (Protein AF-4) (Proto-oncogene AF4) - Mus musculus (Mouse)                                                                                                                                                                   | 132663 | 0 | 16 | 0 | 23 |
| Q64739 | Collagen alpha-2(XI) chain precursor - Mus musculus (Mouse)                                                                                                                                                                                           | 172229 | 0 | 16 | 0 | 15 |
| Q9D8B1 | Androgen-induced protein 1 (AIG-1) - Mus musculus (Mouse)                                                                                                                                                                                             | 30247  | 0 | 16 | 0 | 1  |
| Q91V87 | Fibroblast growth factor receptor-like 1 precursor (FGF receptor-like protein 1) (Fibroblast growth factor receptor 5) - Mus musculus (Mouse)                                                                                                         | 57719  | 0 | 16 | 0 | 7  |
| Q9JLZ3 | Methylglutaconyl-CoA hydratase, mitochondrial precursor (EC 4.2.1.18) (AU-specific RNA-binding enoyl-CoA hydratase) (AU-binding enoyl-CoA hydratase) (muAUH) - Mus musculus (Mouse)                                                                   | 33659  | 0 | 16 | 0 | 3  |

|        |                                                                                                                                                                                     |        |   |    |   |    |
|--------|-------------------------------------------------------------------------------------------------------------------------------------------------------------------------------------|--------|---|----|---|----|
| Q80U30 | Uncharacterized protein KIAA0350 - Mus musculus (Mouse)                                                                                                                             | 117014 | 0 | 16 | 0 | 12 |
| Q8VI67 | Transcription factor Sp7 (Zinc finger protein osterix) (C22) - Mus musculus (Mouse)                                                                                                 | 45317  | 0 | 16 | 0 | 6  |
| Q8VHJ5 | Serine/threonine-protein kinase MARK1 (EC 2.7.11.1) (MAP/microtubule affinity-regulating kinase 1) (ELKL motif serine/threonine-protein kinase 3) - Mus musculus (Mouse)            | 89061  | 0 | 16 | 0 | 8  |
| Q9ERI6 | Retinol dehydrogenase 14 (EC 1.1.1.-) (Alcohol dehydrogenase PAN2) - Mus musculus (Mouse)                                                                                           | 36742  | 0 | 16 | 0 | 3  |
| Q99KK2 | N-acylneuraminate cytidyltransferase (EC 2.7.7.43) (CMP-N-acetylneuraminic acid synthetase) (CMP-NeuNAc synthetase) - Mus musculus (Mouse)                                          | 48655  | 0 | 16 | 0 | 14 |
| Q61627 | Glutamate receptor delta-1 subunit precursor (GluR delta-1) Mus musculus (Mouse)                                                                                                    | 113142 | 0 | 16 | 0 | 8  |
| P35991 | Tyrosine-protein kinase BTK (EC 2.7.10.2) (Bruton tyrosine kinase) (Agammaglobulinaemia tyrosine kinase) (ATK) (B cell progenitor kinase) (BPK) (Kinase EMB) - Mus musculus (Mouse) | 77073  | 0 | 16 | 0 | 14 |
| Q8CCI5 | RING1 and YY1-binding protein (Death effector domain-associated factor) (DED-associated factor) - Mus musculus (Mouse)                                                              | 24990  | 0 | 16 | 0 | 4  |
| Q6PGH2 | Hematological and neurological expressed 1-like protein (HN1-like protein) - Mus musculus (Mouse)                                                                                   | 20065  | 0 | 16 | 0 | 13 |
| Q61508 | Extracellular matrix protein 1 precursor (Secretory component p85) - Mus musculus (Mouse)                                                                                           | 64388  | 0 | 16 | 0 | 3  |
| Q8BVI5 | Syntaxin-16 - Mus musculus (Mouse)                                                                                                                                                  | 37200  | 0 | 16 | 0 | 5  |
| Q924Z6 | Exportin-6 (Exp6) (Ran-binding protein 20) - Mus musculus (Mouse)                                                                                                                   | 129836 | 0 | 16 | 0 | 7  |
| Q8BND4 | Protein DDX26B - Mus musculus (Mouse)                                                                                                                                               | 97677  | 0 | 16 | 0 | 19 |

|        |                                                                                                                                                                                                                                                           |        |   |    |   |    |
|--------|-----------------------------------------------------------------------------------------------------------------------------------------------------------------------------------------------------------------------------------------------------------|--------|---|----|---|----|
| Q61081 | Hsp90 co-chaperone Cdc37 (Hsp90 chaperone protein kinase-targeting subunit) (p50Cdc37) - Mus musculus (Mouse)                                                                                                                                             | 45078  | 0 | 16 | 0 | 2  |
| P12672 | 43 kDa receptor-associated protein of the synapse (RAPsyn) (Acetylcholine receptor-associated 43 kDa protein) (43 kDa postsynaptic protein) - Mus musculus (Mouse)                                                                                        | 47531  | 0 | 16 | 0 | 6  |
| Q9EPN1 | Protein neurobeachin (Lysosomal-trafficking regulator 2) - Mus musculus (Mouse)                                                                                                                                                                           | 328988 | 0 | 16 | 0 | 22 |
| P35173 | Stefin-1 - Mus musculus (Mouse)                                                                                                                                                                                                                           | 11690  | 0 | 16 | 0 | 10 |
| P48168 | Glycine receptor subunit beta precursor (Glycine receptor 58 kDa subunit) - Mus musculus (Mouse)                                                                                                                                                          | 56741  | 0 | 16 | 0 | 3  |
| Q9EQF6 | Dihydropyrimidinase-related protein 5 (DRP-5) (Collapsin response mediator protein 5) (CRMP-5) - Mus musculus (Mouse)                                                                                                                                     | 62047  | 0 | 16 | 0 | 8  |
| P32233 | Developmentally-regulated GTP-binding protein 1 (DRG 1) (Protein NEDD3) (Neural precursor cell expressed developmentally down-regulated protein 3) - Mus musculus (Mouse)                                                                                 | 40772  | 0 | 15 | 0 | 12 |
| Q35643 | AP-1 complex subunit beta-1 (Adapter-related protein complex 1 beta-1 subunit) (Beta-adaptin 1) (Adaptor protein complex AP-1 beta-1 subunit) (Golgi adaptor HA1/AP1 adaptin beta subunit) (Clathrin assembly protein complex 1 beta large chain) - Mus m | 104768 | 0 | 15 | 0 | 3  |
| Q8BKT8 | 26S proteasome-associated UCH37-interacting protein 1 - Mus musculus (Mouse)                                                                                                                                                                              | 28435  | 0 | 15 | 0 | 2  |
| Q4FZF3 | Probable ATP-dependent RNA helicase DDX49 (EC 3.6.1.-) (DEAD box protein 49) - Mus musculus (Mouse)                                                                                                                                                       | 54744  | 0 | 15 | 0 | 10 |
| Q8R1F1 | Niban-like protein - Mus musculus (Mouse)                                                                                                                                                                                                                 | 85392  | 0 | 15 | 0 | 9  |

|        |                                                                                                                                                                                                                                                           |        |   |    |   |    |
|--------|-----------------------------------------------------------------------------------------------------------------------------------------------------------------------------------------------------------------------------------------------------------|--------|---|----|---|----|
| P49135 | TFIIH basal transcription factor complex helicase XPB subunit (EC 3.6.1.-) (Basic transcription factor 2 89 kDa subunit) (BTF2-p89) (TFIIH 89 kDa subunit) (DNA-repair protein complementing XP-B cells) (Xeroderma pigmentosum group B-complementing pro | 89925  | 0 | 15 | 0 | 13 |
| Q8BLV3 | Sodium/hydrogen exchanger 7 (Na(+)/H(+) exchanger 7) (NHE-7) (Solute carrier family 9 member 7) - Mus musculus (Mouse)                                                                                                                                    | 80751  | 0 | 15 | 0 | 7  |
| P70458 | Plasma serine protease inhibitor precursor (PCI) (Protein C inhibitor) (Serpine A5) (Plasminogen activator inhibitor 3) (PAI-3) (PAI3) - Mus musculus (Mouse)                                                                                             | 45707  | 0 | 15 | 0 | 6  |
| Q68FH4 | N-acetylgalactosamine kinase (EC 2.7.1.157) (GalNAc kinase) (Galactokinase 2) - Mus musculus (Mouse)                                                                                                                                                      | 51440  | 0 | 15 | 0 | 12 |
| Q8CIP4 | MAP/microtubule affinity-regulating kinase 4 (EC 2.7.11.1) - Mus musculus (Mouse)                                                                                                                                                                         | 83391  | 0 | 15 | 0 | 9  |
| P22933 | Gamma-aminobutyric-acid receptor subunit delta precursor (GABA(A) receptor subunit delta) - Mus musculus (Mouse)                                                                                                                                          | 50718  | 0 | 15 | 0 | 8  |
| Q8BMQ3 | Zinc finger protein basonuclin-2 - Mus musculus (Mouse)                                                                                                                                                                                                   | 126822 | 0 | 15 | 0 | 7  |
| Q8BWT5 | Disco-interacting protein 2 homolog A - Mus musculus (Mouse)                                                                                                                                                                                              | 167335 | 0 | 15 | 0 | 18 |
| Q8K1S7 | Kremen protein 2 precursor (Kringle-containing protein marking the eye and the nose) (Kringle domain-containing transmembrane protein 2) (Dickkopf receptor 2) - Mus musculus (Mouse)                                                                     | 50223  | 0 | 15 | 0 | 4  |
| Q99M04 | Lipoic acid synthetase, mitochondrial precursor (Lip-syn) (Lipoate synthase) (mLIP1) - Mus musculus (Mouse)                                                                                                                                               | 42423  | 0 | 15 | 0 | 10 |
| Q8BG51 | Mitochondrial Rho GTPase 1 (EC 3.6.5.-) (MIRO-1) (Ras homolog gene family member T1) - Mus musculus (Mouse)                                                                                                                                               | 73222  | 0 | 15 | 0 | 4  |



|        |                                                                                                                                            |        |   |    |   |    |
|--------|--------------------------------------------------------------------------------------------------------------------------------------------|--------|---|----|---|----|
| P14719 | Interleukin-1 receptor-like 1 precursor (ST2 protein) (T1 protein) (Lymphocyte antigen 84) - Mus musculus (Mouse)                          | 65558  | 0 | 15 | 0 | 13 |
| O70279 | Protein DGCR14 (DiGeorge syndrome critical region 14 homolog) (ES2 protein) (Expressed sequence 2 embryonic lethal) - Mus musculus (Mouse) | 52572  | 0 | 15 | 0 | 2  |
| O54792 | Transcription factor HES-2 (Hairy and enhancer of split 2) - Mus musculus (Mouse)                                                          | 17334  | 0 | 15 | 0 | 8  |
| P06683 | Complement component C9 precursor - Mus musculus (Mouse)                                                                                   | 63217  | 0 | 15 | 0 | 7  |
| Q91VY5 | JmjC domain-containing histone demethylation protein 3B (EC 1.14.11.-) (Jumonji domain-containing protein 2B) - Mus musculus (Mouse)       | 123237 | 0 | 15 | 0 | 22 |
| Q5SV66 | Coiled-coil domain-containing protein 42 - Mus musculus (Mouse)                                                                            | 37577  | 0 | 15 | 0 | 9  |
| Q8BGX7 | Uncharacterized protein KIAA0146 - Mus musculus (Mouse)                                                                                    | 105056 | 0 | 15 | 0 | 5  |
| Q7TSC3 | Serine/threonine-protein kinase Nek5 (EC 2.7.11.1) (NimA-related protein kinase 5) - Mus musculus (Mouse)                                  | 72714  | 0 | 15 | 0 | 7  |
| Q09199 | Beta-1,4 N-acetylgalactosaminyltransferase 2 (EC 2.4.1.-) - Mus musculus (Mouse)                                                           | 58623  | 0 | 15 | 0 | 4  |
| Q9D0K1 | Peroxisomal membrane protein PEX13 (Peroxin-13) - Mus musculus (Mouse)                                                                     | 44639  | 0 | 15 | 0 | 15 |
| Q8BHN5 | Developmentally-regulated RNA-binding protein 1 (RB-1) - Mus musculus (Mouse)                                                              | 53690  | 0 | 15 | 0 | 8  |
| Q9EPB5 | Serine hydrolase-like protein (EC 3.1.-.-) (SHL) - Mus musculus (Mouse)                                                                    | 35573  | 0 | 15 | 0 | 11 |
| Q02566 | Myosin-6 (Myosin heavy chain 6) (Myosin heavy chain, cardiac muscle alpha isoform) (MyHC-alpha) - Mus musculus (Mouse)                     | 224225 | 0 | 15 | 0 | 24 |

|        |                                                                                                                                                                                                                                                             |        |   |    |   |    |
|--------|-------------------------------------------------------------------------------------------------------------------------------------------------------------------------------------------------------------------------------------------------------------|--------|---|----|---|----|
| Q91Z83 | Myosin-7 (Myosin heavy chain 7) (Myosin heavy chain, cardiac muscle beta isoform) (MyHC-beta) (Myosin heavy chain slow isoform) (MyHC-slow) - Mus musculus (Mouse)                                                                                          | 223539 | 0 | 15 | 0 | 19 |
| Q8BJ34 | Limkain-b1 - Mus musculus (Mouse)                                                                                                                                                                                                                           | 194934 | 0 | 15 | 0 | 13 |
| P60191 | Regulating synaptic membrane exocytosis protein 4 (Rab3-interacting molecule 4) (RIM 4) (RIM4 gamma) - Mus musculus (Mouse)                                                                                                                                 | 29539  | 0 | 15 | 0 | 6  |
| Q9QZ88 | Vacuolar protein sorting-associated protein 29 (Vesicle protein sorting 29) - Mus musculus (Mouse)                                                                                                                                                          | 20654  | 0 | 15 | 0 | 3  |
| P39061 | Collagen alpha-1(XVIII) chain precursor [Contains: Endostatin] - Mus musculus (Mouse)                                                                                                                                                                       | 183144 | 0 | 15 | 0 | 20 |
| Q60846 | Tumor necrosis factor receptor superfamily member 8 precursor (CD30L receptor) (Lymphocyte activation antigen CD30) - Mus musculus (Mouse)                                                                                                                  | 54607  | 0 | 15 | 0 | 1  |
| Q925N2 | Sideroflexin-2 - Mus musculus (Mouse)                                                                                                                                                                                                                       | 36517  | 0 | 15 | 0 | 9  |
| P97325 | CMP-N-acetylneuraminate-beta-1,4-galactoside alpha-2,3-sialyltransferase (EC 2.4.99.6) (N-acetylglucosaminidase alpha-2,3-sialyltransferase) (Gal beta-1,3(4) GlcNAc alpha-2,3 sialyltransferase) (ST3N) (ST3GalIII) (Sialyltransferase 6) - Mus musculus ( | 42389  | 0 | 15 | 0 | 6  |
| Q9CWN7 | Uncharacterized protein C2orf29 homolog - Mus musculus (Mouse)                                                                                                                                                                                              | 55266  | 0 | 15 | 0 | 10 |
| P19426 | Negative elongation factor E (NELF-E) (RD protein) - Mus musculus (Mouse)                                                                                                                                                                                   | 42642  | 0 | 15 | 0 | 2  |
| Q8R0W1 | Uncharacterized protein KIAA1737 - Mus musculus (Mouse)                                                                                                                                                                                                     | 46633  | 0 | 15 | 0 | 12 |
| Q9Z210 | Peroxisomal membrane protein 11B (Peroxin-11B) (Peroxisomal biogenesis factor 11B) (PEX11beta) (Pex11pbeta) - Mus musculus (Mouse)                                                                                                                          | 29148  | 0 | 15 | 0 | 4  |

|        |                                                                                                                                                                                                             |        |   |    |   |    |
|--------|-------------------------------------------------------------------------------------------------------------------------------------------------------------------------------------------------------------|--------|---|----|---|----|
| Q7M761 | Ovochymase-2 precursor (EC 3.4.21.-) (Oviductin) - Mus musculus (Mouse)                                                                                                                                     | 68708  | 0 | 15 | 0 | 4  |
| O08976 | Probasin precursor (PB) - Mus musculus (Mouse)                                                                                                                                                              | 20587  | 0 | 15 | 0 | 1  |
| P13595 | Neural cell adhesion molecule 1, 120 kDa isoform precursor (N-CAM 120) (NCAM-120) - Mus musculus (Mouse)                                                                                                    | 80816  | 0 | 15 | 0 | 6  |
| Q8CGQ8 | Sodium/potassium/calcium exchanger 4 precursor (Na(+)/K(+)/Ca(2+)-exchange protein 4) - Mus musculus (Mouse)                                                                                                | 67621  | 0 | 15 | 0 | 8  |
| Q9CVD2 | Ataxin-3 (EC 3.4.22.-) (Machado-Joseph disease protein 1 homolog) - Mus musculus (Mouse)                                                                                                                    | 40793  | 0 | 15 | 0 | 8  |
| P29020 | T-cell surface glycoprotein CD3 eta chain precursor (T-cell receptor T3 eta chain) - Mus musculus (Mouse)                                                                                                   | 23496  | 0 | 15 | 0 | 17 |
| P35123 | Ubiquitin carboxyl-terminal hydrolase 4 (EC 3.1.2.15) (Ubiquitin thioesterase 4) (Ubiquitin-specific-processing protease 4) (Deubiquitinating enzyme 4) (Ubiquitous nuclear protein) - Mus musculus (Mouse) | 109637 | 0 | 15 | 0 | 8  |
| Q9QYE9 | Pleckstrin homology domain-containing family B member 1 (Pleckstrin homology domain retinal protein 1) (PH domain-containing protein in retina 1) (PHRET1) - Mus musculus (Mouse)                           | 27722  | 0 | 15 | 0 | 54 |
| Q9WVG6 | Histone-arginine methyltransferase CARM1 (EC 2.1.1.125) (EC 2.1.1.-) (Protein arginine N-methyltransferase 4) (Coactivator-associated arginine methyltransferase 1) - Mus musculus (Mouse)                  | 66382  | 0 | 15 | 0 | 9  |
| P70158 | Acid sphingomyelinase-like phosphodiesterase 3a precursor (EC 3.1.4.-) (ASM-like phosphodiesterase 3a) - Mus musculus (Mouse)                                                                               | 50320  | 0 | 15 | 0 | 5  |

|        |                                                                                                                                                                                    |        |   |    |   |    |
|--------|------------------------------------------------------------------------------------------------------------------------------------------------------------------------------------|--------|---|----|---|----|
| Q76EC5 | Carbohydrate sulfotransferase 9 (EC 2.8.2.-) (N-acetylgalactosamine-4-O-sulfotransferase 2) (GalNAc-4-O-sulfotransferase 2) (GalNAc-4-ST2) - Mus musculus (Mouse)                  | 48259  | 0 | 15 | 0 | 19 |
| P97369 | Neutrophil cytosol factor 4 (NCF-4) (Neutrophil NADPH oxidase factor 4) (p40-phox) (p40phox) - Mus musculus (Mouse)                                                                | 38881  | 0 | 15 | 0 | 7  |
| Q9CQW2 | ADP-ribosylation factor-like protein 8B (ADP-ribosylation factor-like protein 10C) (Novel small G protein indispensable for equal chromosome segregation 1) - Mus musculus (Mouse) | 21753  | 0 | 15 | 0 | 3  |
| Q9QZZ4 | Myosin-XV (Unconventional myosin-15) - Mus musculus (Mouse)                                                                                                                        | 398024 | 0 | 15 | 0 | 39 |
| Q62432 | Mothers against decapentaplegic homolog 2 (SMAD 2) (Mothers against DPP homolog 2) (MAD homolog 2) (Mad-related protein 2) (mMad2) - Mus musculus (Mouse)                          | 53145  | 0 | 15 | 0 | 23 |
| Q9JJD0 | THAP domain-containing protein 11 - Mus musculus (Mouse)                                                                                                                           | 33597  | 0 | 15 | 0 | 8  |
| Q9JIG8 | PRA1 family protein 2 - Mus musculus (Mouse)                                                                                                                                       | 19694  | 0 | 15 | 0 | 2  |
| Q9QZK7 | Docking protein 3 (Downstream of tyrosine kinase 3) (P62(dok)-like protein) (DOK-L) - Mus musculus (Mouse)                                                                         | 48738  | 0 | 15 | 0 | 6  |
| Q88796 | Ribonuclease P protein subunit p30 (EC 3.1.26.5) (RNaseP protein p30) (RNase P subunit 2) - Mus musculus (Mouse)                                                                   | 29854  | 0 | 15 | 0 | 7  |
| Q8K4F0 | CD226 antigen precursor (Platelet and T-cell activation antigen 1) - Mus musculus (Mouse)                                                                                          | 38495  | 0 | 15 | 0 | 7  |
| Q88630 | Golgi SNAP receptor complex member 1 (28 kDa Golgi SNARE protein) (28 kDa cis-Golgi SNARE p28) (GOS-28) - Mus musculus (Mouse)                                                     | 28526  | 0 | 15 | 0 | 7  |
| Q9D2G5 | Synaptojanin-2 (EC 3.1.3.36) (Synaptic inositol-1,4,5-trisphosphate 5-phosphatase 2) - Mus musculus (Mouse)                                                                        | 159578 | 0 | 15 | 0 | 13 |

|        |                                                                                                                                                                                                                        |        |   |    |   |    |
|--------|------------------------------------------------------------------------------------------------------------------------------------------------------------------------------------------------------------------------|--------|---|----|---|----|
| Q9CPR1 | RWD domain-containing protein 4A - Mus musculus (Mouse)                                                                                                                                                                | 21125  | 0 | 15 | 0 | 7  |
| Q9ESJ0 | Exportin-4 (Exp4) - Mus musculus (Mouse)                                                                                                                                                                               | 131137 | 0 | 15 | 0 | 24 |
| Q91YU8 | Suppressor of SWI4 1 homolog (Ssf-1) (Peter Pan homolog) - Mus musculus (Mouse)                                                                                                                                        | 52807  | 0 | 15 | 0 | 12 |
| Q766D5 | N-acetyl-beta-glucosaminyl-glycoprotein 4-beta-N-acetylgalactosaminyltransferase 1 (EC 2.4.1.244) (NGalNAc-T1) (Beta-1,4-N-acetylgalactosaminyltransferase IV) (Beta4GalNAc-T4) (Beta4GalNAcT4) - Mus musculus (Mouse) | 117813 | 0 | 15 | 0 | 6  |
| Q6PIE5 | Sodium/potassium-transporting ATPase alpha-2 chain precursor (EC 3.6.3.9) (Sodium pump 2) (Na(+)/K(+) ATPase 2) (Alpha(+)) - Mus musculus (Mouse)                                                                      | 113457 | 0 | 15 | 0 | 18 |
| Q62413 | Ephrin type-A receptor 6 precursor (EC 2.7.10.1) (Tyrosine-protein kinase receptor EHK-2) (EPH homology kinase 2) - Mus musculus (Mouse)                                                                               | 117659 | 0 | 15 | 0 | 9  |
| Q8BM85 | TBC domain-containing protein kinase-like protein - Mus musculus (Mouse)                                                                                                                                               | 87571  | 0 | 15 | 0 | 8  |
| P50405 | Pulmonary surfactant-associated protein B precursor (SP-B) (Pulmonary surfactant-associated proteolipid SPL(Phe)) - Mus musculus (Mouse)                                                                               | 43183  | 0 | 15 | 0 | 33 |
| Q99J27 | Acetyl-coenzyme A transporter 1 (AT-1) (Acetyl-CoA transporter) (Solute carrier family 33 member 1) - Mus musculus (Mouse)                                                                                             | 61549  | 0 | 15 | 0 | 4  |
| Q91X88 | Protein O-linked-mannose beta-1,2-N-acetylglucosaminyltransferase 1 (EC 2.4.1.-) (POMGnT1) - Mus musculus (Mouse)                                                                                                      | 75632  | 0 | 15 | 0 | 10 |
| P51658 | Estradiol 17-beta-dehydrogenase 2 (EC 1.1.1.62) (17-beta-HSD 2) (17-beta-hydroxysteroid dehydrogenase 2) - Mus musculus (Mouse)                                                                                        | 42436  | 0 | 15 | 0 | 12 |

|        |                                                                                                                                                                                                                                                           |        |   |    |   |    |
|--------|-----------------------------------------------------------------------------------------------------------------------------------------------------------------------------------------------------------------------------------------------------------|--------|---|----|---|----|
| P70227 | Inositol 1,4,5-trisphosphate receptor type 3 (Type 3 inositol 1,4,5-trisphosphate receptor) (Type 3 InsP3 receptor) (IP3 receptor isoform 3) (InsP3R3) - Mus musculus (Mouse)                                                                             | 306931 | 0 | 15 | 0 | 40 |
| Q6P9Q4 | FH1/FH2 domain-containing protein (Formin homolog overexpressed in spleen) (FHOS) (Formin homology 2 domain-containing protein 1) - Mus musculus (Mouse)                                                                                                  | 130774 | 0 | 15 | 0 | 15 |
| Q9EQM3 | Homeobox protein Nkx-2.4 (Homeobox protein NKX2.4) (Homeobox protein NK-2 homolog D) - Mus musculus (Mouse)                                                                                                                                               | 36316  | 0 | 15 | 0 | 2  |
| Q8R3S6 | Exocyst complex component 1 (Exocyst complex component Sec3) - Mus musculus (Mouse)                                                                                                                                                                       | 102668 | 0 | 15 | 0 | 14 |
| P42866 | Mu-type opioid receptor (MOR-1) - Mus musculus (Mouse)                                                                                                                                                                                                    | 45361  | 0 | 15 | 0 | 2  |
| P70182 | Phosphatidylinositol-4-phosphate 5-kinase type-1 alpha (EC 2.7.1.68) (Phosphatidylinositol-4-phosphate 5-kinase type I alpha) (PtdIns(4)P-5-kinase alpha) (PIP5KIalpha) (Phosphatidylinositol-4-phosphate 5-kinase type I beta) (PI4P5KIbeta) (68 kDa typ | 60789  | 0 | 14 | 0 | 7  |
| Q4LDG0 | Bile acyl-CoA synthetase (EC 6.2.1.7) (BACS) (Bile acid CoA ligase) (BA-CoA ligase) (BAL) (Cholate--CoA ligase) (Very long chain acyl-CoA synthetase-related protein) (VLACS-related) (VLACSR) (Fatty acid transport protein 5) (FATP-5) (Solute carrier  | 77123  | 0 | 14 | 0 | 19 |
| P54285 | Voltage-dependent L-type calcium channel subunit beta-3 (CAB3) (Calcium channel voltage-dependent subunit beta 3) (CCHB3) - Mus musculus (Mouse)                                                                                                          | 54756  | 0 | 14 | 0 | 7  |

|        |                                                                                                                                                                                     |        |   |    |   |    |
|--------|-------------------------------------------------------------------------------------------------------------------------------------------------------------------------------------|--------|---|----|---|----|
| Q3V009 | Transmembrane emp24 domain-containing protein 1 precursor (Interleukin-1 receptor-like 1 ligand) (Putative T1/ST2 receptor-binding protein) - Mus musculus (Mouse)                  | 25418  | 0 | 14 | 0 | 2  |
| O55188 | Dentin matrix acidic phosphoprotein 1 precursor (Dentin matrix protein 1) (DMP-1) (AG1) - Mus musculus (Mouse)                                                                      | 54084  | 0 | 14 | 0 | 4  |
| Q8K448 | ATP-binding cassette sub-family A member 5 - Mus musculus (Mouse)                                                                                                                   | 187371 | 0 | 14 | 0 | 13 |
| Q9CTN4 | Rho-related BTB domain-containing protein 3 - Mus musculus (Mouse)                                                                                                                  | 70498  | 0 | 14 | 0 | 9  |
| Q9D287 | Breast carcinoma amplified sequence 2 homolog (DNA amplified in mammary carcinoma 1 protein) - Mus musculus (Mouse)                                                                 | 26229  | 0 | 14 | 0 | 6  |
| Q8K310 | Matrin-3 - Mus musculus (Mouse)                                                                                                                                                     | 95085  | 0 | 14 | 0 | 10 |
| O35633 | Vesicular inhibitory amino acid transporter (GABA and glycine transporter) (Vesicular GABA transporter) (mVIAAT) (mVGAT) (Solute carrier family 32 member 1) - Mus musculus (Mouse) | 58313  | 0 | 14 | 0 | 13 |
| Q9EST1 | Gasdermin - Mus musculus (Mouse)                                                                                                                                                    | 49847  | 0 | 14 | 0 | 11 |
| Q8BNU0 | Armadillo repeat-containing protein 6 - Mus musculus (Mouse)                                                                                                                        | 51564  | 0 | 14 | 0 | 1  |
| Q9WVL1 | AP-4 complex subunit sigma-1 (Adapter-related protein complex 4 sigma-1 subunit) (Sigma subunit of AP-4) (AP-4 adapter complex sigma subunit) - Mus musculus (Mouse)                | 16978  | 0 | 14 | 0 | 6  |
| Q3TFQ1 | Chronic lymphocytic leukemia deletion region gene 6 protein homolog (CLL deletion region gene 6 protein homolog) - Mus musculus (Mouse)                                             | 22123  | 0 | 14 | 0 | 11 |
| Q9CZW2 | Centromere protein N (CENP-N) - Mus musculus (Mouse)                                                                                                                                | 39557  | 0 | 14 | 0 | 6  |
| Q9D8U8 | Sorting nexin-5 - Mus musculus (Mouse)                                                                                                                                              | 47053  | 0 | 14 | 0 | 1  |

|        |                                                                                                                                                                                                                                                           |        |   |    |   |    |
|--------|-----------------------------------------------------------------------------------------------------------------------------------------------------------------------------------------------------------------------------------------------------------|--------|---|----|---|----|
| P14234 | Proto-oncogene tyrosine-protein kinase FGR (EC 2.7.10.2) (P55-FGR) (C-FGR) - Mus musculus (Mouse)                                                                                                                                                         | 59400  | 0 | 14 | 0 | 12 |
| Q8CHE4 | PH domain leucine-rich repeat-containing protein phosphatase (EC 3.1.3.16) (PH domain leucine-rich repeat protein phosphatase) (Pleckstrin homology domain-containing family E protein 1) (Suprachiasmatic nucleus circadian oscillatory protein) - Mus m | 184875 | 0 | 14 | 0 | 18 |
| P60060 | Protein transport protein SEC61 subunit gamma - Mus musculus (Mouse)                                                                                                                                                                                      | 7793   | 0 | 14 | 0 | 7  |
| P29594 | Caspase-2 precursor (EC 3.4.22.-) (CASP-2) (ICH-1 protease) (NEDD2 protein) (Neural precursor cell expressed developmentally down-regulated protein 2) (NEDD-2) [Contains: Caspase-2 subunit p18; Caspase-2 subunit p13; Caspase-2 subunit p12] - Mus mus | 51598  | 0 | 14 | 0 | 8  |
| P13366 | Granzyme G precursor (EC 3.4.21.-) (CTL serine protease 1) (MCSP-1) - Mus musculus (Mouse)                                                                                                                                                                | 27706  | 0 | 14 | 0 | 7  |
| P60840 | Alpha-endosulfine (ARPP-19e) - Mus musculus (Mouse)                                                                                                                                                                                                       | 13327  | 0 | 14 | 0 | 5  |
| Q64687 | Alpha-N-acetylneuraminide alpha-2,8-sialyltransferase (EC 2.4.99.8) (Ganglioside GD3 synthase) (Ganglioside GT3 synthase) (Alpha-2,8-sialyltransferase 8A) (ST8Sia I) - Mus musculus (Mouse)                                                              | 40736  | 0 | 14 | 0 | 8  |
| P15105 | Glutamine synthetase (EC 6.3.1.2) (Glutamate--ammonia ligase) (GS) - Mus musculus (Mouse)                                                                                                                                                                 | 42803  | 0 | 14 | 0 | 7  |
| Q9R049 | Autocrine motility factor receptor (EC 6.3.2.19) (AMF receptor) - Mus musculus (Mouse)                                                                                                                                                                    | 73913  | 0 | 14 | 0 | 5  |



|        |                                                                                                                                      |        |   |    |   |    |
|--------|--------------------------------------------------------------------------------------------------------------------------------------|--------|---|----|---|----|
| Q62136 | Tyrosine-protein phosphatase non-receptor type 21 (EC 3.1.3.48) (Protein-tyrosine phosphatase PTP-RL10) - Mus musculus (Mouse)       | 134206 | 0 | 14 | 0 | 25 |
| P97718 | Alpha-1A adrenergic receptor (Alpha 1A-adrenoceptor) (Alpha 1A-adrenoreceptor) (Alpha-1C adrenergic receptor) - Mus musculus (Mouse) | 52812  | 0 | 14 | 0 | 6  |
| Q60891 | Olfactory receptor 139 (Olfactory receptor 1) (Olfactory receptor 255-2) (Odorant receptor M5) - Mus musculus (Mouse)                | 35143  | 0 | 14 | 0 | 2  |
| O54803 | P2X purinoceptor 6 (ATP receptor) (P2X6) (Purinergic receptor) (P2XM) (Purinergic receptor P2X-like 1) - Mus musculus (Mouse)        | 42830  | 0 | 14 | 0 | 4  |
| O55201 | Transcription elongation factor SPT5 (DRB sensitivity-inducing factor large subunit) (DSIF large subunit) - Mus musculus (Mouse)     | 120988 | 0 | 14 | 0 | 7  |
| Q05421 | Cytochrome P450 2E1 (EC 1.14.14.1) (CYP11E1) (P450-J) (P450-ALC) - Mus musculus (Mouse)                                              | 57168  | 0 | 14 | 0 | 14 |
| P61166 | UPF0197 protein C11orf10 homolog - Mus musculus (Mouse)                                                                              | 9073   | 0 | 14 | 0 | 3  |
