# Supplementary material
Source: PubMed Central journal article supplement (PMC2818196)
Supplement: supp_123_4_586__2.pdf [file supp_123_4_586__2.pdf]

| Table S2.            | The reference list of proteins affected by Dicer deletion                                                                                                                                           |
|----------------------|-----------------------------------------------------------------------------------------------------------------------------------------------------------------------------------------------------|
| Uniprot Accession ID | Protein Description.                                                                                                                                                                                |
| P05215               | Tubulin alpha-4 chain (Alpha-tubulin 4) (Alpha-tubulin isotype M-alpha-4) - Mus musculus (Mouse)                                                                                                    |
| P10854               | Histone H2B type 1-M (H2B 291B) - Mus musculus (Mouse)                                                                                                                                              |
| P84228               | Histone H3.2 - Mus musculus (Mouse)                                                                                                                                                                 |
| Q62095               | ATP-dependent RNA helicase DDX3Y (EC 3.6.1.-) (DEAD box protein 3, Y-chromosomal) (DEAD-box RNA helicase DEAD2) (mDEAD2) (D1Pas1-related sequence 1) - Mus musculus (Mouse)                         |
| Q62167               | ATP-dependent RNA helicase DDX3X (EC 3.6.1.-) (DEAD box protein 3, X-chromosomal) (DEAD box RNA helicase DEAD3) (mDEAD3) (Embryonic RNA helicase) (D1Pas1-related sequence 2) -                     |
| Q9D2U9               | Histone H2B type 3-A - Mus musculus (Mouse)                                                                                                                                                         |
| P14873               | Microtubule-associated protein 1B (MAP 1B) (MAP1.2) (MAP1(X)) [Contains: MAP1 light chain LC1] -                                                                                                    |
| Q69ZM6               | Serine/threonine-protein kinase 36 (EC 2.7.11.1) (Fused homolog) - Mus musculus (Mouse)                                                                                                             |
| Q9Z331               | Keratin, type II cytoskeletal 6B (Cytokeratin-6B) (CK 6B) (K6b keratin) (Keratin-6 beta) (mK6-beta) -                                                                                               |
| Q91ZD4               | Vang-like protein 2 (Van Gogh-like protein 2) (Loop-tail-associated protein) (Loop-tail protein 1) -                                                                                                |
| Q9EQM6               | Protein DGCR8 (DiGeorge syndrome critical region 8 homolog) (Gy1) - Mus musculus (Mouse)                                                                                                            |
| Q60664               | Lymphoid-restricted membrane protein (Protein Jaw1) - Mus musculus (Mouse)                                                                                                                          |
| O08532               | Dihydropyridine-sensitive L-type calcium channel subunits alpha-2/delta precursor [Contains: L-type calcium channel subunit alpha-2; L-type calcium channel subunit delta] - Mus musculus (Mouse)   |
| Q60900               | ELAV-like protein 3 (Hu-antigen C) (HuC) - Mus musculus (Mouse)                                                                                                                                     |
| Q8BIK4               | Dedicator of cytokinesis protein 9 (Cdc42 guanine nucleotide exchange factor zizimin-1) - Mus                                                                                                       |
| Q8BHZ4               | Zinc finger protein 592 (Zfp-592) - Mus musculus (Mouse)                                                                                                                                            |
| Q9WVL3               | Solute carrier family 12 member 7 (Electroneutral potassium-chloride cotransporter 4) (K-Cl                                                                                                         |
| Q8CFE4               | SCY1-like protein 2 (Coated vesicle-associated kinase of 104 kDa) - Mus musculus (Mouse)                                                                                                            |
| Q8C636               | FACT complex subunit SPT16 (Facilitates chromatin transcription complex subunit SPT16) (FACT 140 kDa subunit) (FACTp140) (Chromatin-specific transcription elongation factor 140 kDa subunit) -     |
| Q9QXL2               | Kinesin family member 21A - Mus musculus (Mouse)                                                                                                                                                    |
| Q91YR7               | Pre-mRNA-processing factor 6 (PRP6 homolog) (U5 snRNP-associated 102 kDa protein) (U5-102                                                                                                           |
| Q62468               | Villin-1 - Mus musculus (Mouse)                                                                                                                                                                     |
| Q810T2               | G2/mitotic-specific cyclin-B3 - Mus musculus (Mouse)                                                                                                                                                |
| Q80U72               | Protein LAP4 (Protein scribble homolog) - Mus musculus (Mouse)                                                                                                                                      |
| Q8C2E7               | Uncharacterized protein KIAA0196 - Mus musculus (Mouse)                                                                                                                                             |
| Q924W5               | Structural maintenance of chromosomes protein 6 (mSMC6) - Mus musculus (Mouse)                                                                                                                      |
| P33175               | Kinesin heavy chain isoform 5A (Neuronal kinesin heavy chain) (NKHC) (Kinesin heavy chain neuron-specific 1) - Mus musculus (Mouse)                                                                 |
| P63085               | Mitogen-activated protein kinase 1 (EC 2.7.11.24) (Extracellular signal-regulated kinase 2) (ERK-2) (Mitogen-activated protein kinase 2) (MAP kinase 2) (MAPK 2) (p42-MAPK) (ERT1) - Mus musculus   |
| Q80TG1               | Uncharacterized protein KIAA1267 - Mus musculus (Mouse)                                                                                                                                             |
| Q62383               | Transcription elongation factor SPT6 - Mus musculus (Mouse)                                                                                                                                         |
| Q3UTH8               | Rho guanine nucleotide exchange factor 9 (Rac/Cdc42 guanine nucleotide exchange factor 9)                                                                                                           |
| P83510               | Traf2 and NCK-interacting protein kinase (EC 2.7.11.1) (Fragments) - Mus musculus (Mouse)                                                                                                           |
| Q80XI3               | Eukaryotic translation initiation factor 4 gamma 3 (eIF-4-gamma 3) (eIF-4G 3) (eIF4G 3) (eIF-4-gamma II) (eIF4GII) - Mus musculus (Mouse)                                                           |
| Q922D8               | C-1-tetrahydrofolate synthase, cytoplasmic (C1-THF synthase) [Includes: Methylenetetrahydrofolate dehydrogenase (EC 1.5.1.5); Methenyltetrahydrofolate cyclohydrolase (EC 3.5.4.9);                 |
| P08071               | Lactotransferrin precursor (EC 3.4.21.-) (Lactoferrin) - Mus musculus (Mouse)                                                                                                                       |
| P28658               | Ataxin-10 (Spinocerebellar ataxia type 10 protein homolog) (Brain protein E46) - Mus musculus                                                                                                       |
| Q8R1U1               | Conserved oligomeric Golgi complex component 4 - Mus musculus (Mouse)                                                                                                                               |
| P35918               | Vascular endothelial growth factor receptor 2 precursor (EC 2.7.10.1) (VEGFR-2) (Protein-tyrosine kinase receptor flk-1) (Fetal liver kinase 1) (Kinase NYK) (CD309 antigen) - Mus musculus (Mouse) |

|        |                                                                                                                                                                                            |
|--------|--------------------------------------------------------------------------------------------------------------------------------------------------------------------------------------------|
| P05622 | Beta platelet-derived growth factor receptor precursor (EC 2.7.10.1) (PDGF-R-beta) (CD140b)                                                                                                |
| Q80TE4 | Signal-induced proliferation-associated 1-like protein 2 - Mus musculus (Mouse)                                                                                                            |
| Q8BJL1 | F-box only protein 30 - Mus musculus (Mouse)                                                                                                                                               |
| Q8BRM2 | N-terminal kinase-like-binding protein 1 (NTKL-binding protein 1) (NTKL-BP1) (mNTKL-BP1) (SCY1-like 1-binding protein 1) (SCYL1-binding protein 1) (SCYL1-BP1) - Mus musculus (Mouse)      |
| Q8JZQ9 | Eukaryotic translation initiation factor 3 subunit 9 (eIF-3 eta) (eIF3 p116) - Mus musculus (Mouse)                                                                                        |
| P35438 | Glutamate [NMDA] receptor subunit zeta 1 precursor (N-methyl-D-aspartate receptor subunit NR1) -                                                                                           |
| Q9CWI3 | BRCA2 and CDKN1A-interacting protein - Mus musculus (Mouse)                                                                                                                                |
| P28738 | Kinesin heavy chain isoform 5C (Kinesin heavy chain neuron-specific 2) - Mus musculus (Mouse)                                                                                              |
| P97855 | Ras GTPase-activating protein-binding protein 1 (EC 3.6.1.-) (G3BP-1) (ATP-dependent DNA helicase VIII) (HDH-VIII) (GAP SH3 domain-binding protein 1) - Mus musculus (Mouse)               |
| P63242 | Eukaryotic translation initiation factor 5A-1 (eIF-5A-1) (eIF-5A1) (Eukaryotic initiation factor 5A isoform 1) (eIF-5A) (eIF-4D) - Mus musculus (Mouse)                                    |
| O09167 | 60S ribosomal protein L21 - Mus musculus (Mouse)                                                                                                                                           |
| Q60598 | Src substrate cortactin - Mus musculus (Mouse)                                                                                                                                             |
| Q7M6U3 | Testis-expressed protein 14 (Testis-expressed sequence 14) - Mus musculus (Mouse)                                                                                                          |
| Q63844 | Mitogen-activated protein kinase 3 (EC 2.7.11.24) (Extracellular signal-regulated kinase 1) (ERK-1) (Insulin-stimulated MAP2 kinase) (MAP kinase 1) (MAPK 1) (p44-ERK1) (ERT2) (p44-MAPK)  |
| P27773 | Protein disulfide-isomerase A3 precursor (EC 5.3.4.1) (Disulfide isomerase ER-60) (ERp60) (58 kDa microsomal protein) (p58) (ERp57) - Mus musculus (Mouse)                                 |
| Q9DAW9 | Calponin-3 (Calponin, acidic isoform) - Mus musculus (Mouse)                                                                                                                               |
| Q9R1T4 | Septin-6 - Mus musculus (Mouse)                                                                                                                                                            |
| P84084 | ADP-ribosylation factor 5 - Mus musculus (Mouse)                                                                                                                                           |
| P14685 | 26S proteasome non-ATPase regulatory subunit 3 (26S proteasome regulatory subunit S3) (Proteasome subunit p58) (Transplantation antigen P91A) (Tum-P91A antigen) - Mus musculus            |
| P56960 | Exosome component 10 (Polymyositis/scleroderma autoantigen 2 homolog) (Autoantigen PM/Sc1 2                                                                                                |
| Q60875 | Rho/Rac guanine nucleotide exchange factor 2 (Lymphoid blast crisis-like 1) (LBC~S first cousin) (Oncogene LFC) (RHOBIN) - Mus musculus (Mouse)                                            |
| Q400C8 | Archaemetzincin-2 (EC 3.-.-.-) (Archeobacterial metalloproteinase-like protein 2) - Mus musculus                                                                                           |
| P35235 | Tyrosine-protein phosphatase non-receptor type 11 (EC 3.1.3.48) (Protein-tyrosine phosphatase SYP) (SH-PTP2) (SHP-2) (Shp2) - Mus musculus (Mouse)                                         |
| Q8BPU7 | Engulfment and cell motility protein 1 (CED-12 homolog) - Mus musculus (Mouse)                                                                                                             |
| Q8CG03 | cGMP-specific 3~5~-cyclic phosphodiesterase (EC 3.1.4.35) (CGB-PDE) (cGMP-binding cGMP-specific phosphodiesterase) - Mus musculus (Mouse)                                                  |
| Q3TPE9 | Ankyrin repeat and MYND domain-containing protein 2 - Mus musculus (Mouse)                                                                                                                 |
| Q9DAA3 | Uncharacterized protein C4orf36 homolog - Mus musculus (Mouse)                                                                                                                             |
| Q61410 | cGMP-dependent protein kinase 2 (EC 2.7.11.12) (CGK 2) (cGKII) (Type II cGMP-dependent protein                                                                                             |
| Q99MK9 | Ras association domain-containing protein 1 (Protein 123F2) - Mus musculus (Mouse)                                                                                                         |
| P54822 | Adenylosuccinate lyase (EC 4.3.2.2) (Adenylosuccinase) (ASL) (ASASE) - Mus musculus (Mouse)                                                                                                |
| Q9DC70 | NADH dehydrogenase [ubiquinone] iron-sulfur protein 7, mitochondrial precursor (EC 1.6.5.3) (EC 1.6.99.3) (NADH-ubiquinone oxidoreductase 20 kDa subunit) (Complex I-20kD) (CI-20kD) - Mus |
| P35917 | Vascular endothelial growth factor receptor 3 precursor (EC 2.7.10.1) (VEGFR-3) (Tyrosine-protein kinase receptor FLT4) - Mus musculus (Mouse)                                             |
| Q9Z1Y4 | Thyroid receptor-interacting protein 6 (TRIP-6) (Zyxin-related protein 1) (ZRP-1) - Mus musculus                                                                                           |
| P35283 | Ras-related protein Rab-12 (Rab-13) - Mus musculus (Mouse)                                                                                                                                 |
| P35276 | Ras-related protein Rab-3D - Mus musculus (Mouse)                                                                                                                                          |
| Q80Y50 | Calmodulin-binding transcription activator 2 - Mus musculus (Mouse)                                                                                                                        |
| P36898 | Bone morphogenetic protein receptor type IB precursor (EC 2.7.11.30) (Serine/threonine-protein kinase receptor R6) (SKR6) (Activin receptor-like kinase 6) (ALK-6) - Mus musculus (Mouse)  |
| Q8C2S5 | F-box/LRR-repeat protein 5 (F-box and leucine-rich repeat protein 5) - Mus musculus (Mouse)                                                                                                |
| Q61823 | Programmed cell death protein 4 (Topoisomerase-inhibitor suppressed protein) (Protein MA-3) - Mus                                                                                          |
| Q7JJ13 | Bromodomain-containing protein 2 (Protein RING3) (Female sterile homeotic-related protein 1) (Fsrq-                                                                                        |

|        |                                                                                                                                                                                        |
|--------|----------------------------------------------------------------------------------------------------------------------------------------------------------------------------------------|
| Q78T81 | Protein FAM102A - Mus musculus (Mouse)                                                                                                                                                 |
| P57780 | Alpha-actinin-4 (Non-muscle alpha-actinin 4) (F-actin cross-linking protein) - Mus musculus (Mouse)                                                                                    |
| Q9QXE2 | DNA polymerase lambda (EC 2.7.7.7) (EC 4.2.99.-) (Pol Lambda) (DNA polymerase kappa) - Mus                                                                                             |
| Q8BSL7 | ADP-ribosylation factor 2 - Mus musculus (Mouse)                                                                                                                                       |
| Q8BWW9 | Serine/threonine-protein kinase N2 (EC 2.7.11.13) (Protein kinase C-like 2) (Protein-kinase C-related kinase 2) - Mus musculus (Mouse)                                                 |
| P97384 | Annexin A11 (Annexin XI) (Calcyclin-associated annexin 50) (CAP-50) - Mus musculus (Mouse)                                                                                             |
| P15806 | Transcription factor E2-alpha (Immunoglobulin enhancer-binding factor E12/E47) (Transcription factor 3) (TCF-3) (Transcription factor A1) - Mus musculus (Mouse)                       |
| Q80XI7 | Vomeromodulin precursor - Mus musculus (Mouse)                                                                                                                                         |
| Q9CWR8 | DNA (cytosine-5)-methyltransferase 3-like - Mus musculus (Mouse)                                                                                                                       |
| Q8C1B7 | Septin-11 - Mus musculus (Mouse)                                                                                                                                                       |
| Q99N16 | Cytochrome P450 4F3 (EC 1.14.13.30) (CYP1V3) (Leukotriene-B(4) omega-hydroxylase) (Leukotriene-B(4) 20-monooxygenase) (Cytochrome P450-LTB-omega) - Mus musculus (Mouse)               |
| O88907 | E3 SUMO-protein ligase PIAS1 (Protein inhibitor of activated STAT protein 1) (DEAD/H box-binding                                                                                       |
| P60762 | Mortality factor 4-like protein 1 (MORF-related gene 15 protein) (Transcription factor-like protein MRG15) (Testis-expressed gene 189 protein) - Mus musculus (Mouse)                  |
| Q8BMQ2 | General transcription factor 3C polypeptide 4 (EC 2.3.1.48) (Transcription factor IIIC subunit delta) (TF3C-delta) (TFIIIC 90 kDa subunit) (TFIIIC 90) - Mus musculus (Mouse)          |
| P07356 | Annexin A2 (Annexin II) (Lipocortin II) (Calpactin I heavy chain) (Chromobindin-8) (p36) (Protein I) (Placental anticoagulant protein IV) (PAP-IV) - Mus musculus (Mouse)              |
| P35279 | Ras-related protein Rab-6A (Rab-6) - Mus musculus (Mouse)                                                                                                                              |
| Q9JIF0 | Protein arginine N-methyltransferase 1 (EC 2.1.1.-) - Mus musculus (Mouse)                                                                                                             |
| Q8K2Y7 | 39S ribosomal protein L47, mitochondrial precursor (L47mt) (MRP-L47) - Mus musculus (Mouse)                                                                                            |
| Q9D0D5 | Transcription initiation factor IIE subunit alpha (TFIIE-alpha) (General transcription factor IIE subunit 1) (General transcription factor IIE 56 kDa subunit) - Mus musculus (Mouse)  |
| Q69ZQ2 | Pre-mRNA-splicing factor ISY1 homolog - Mus musculus (Mouse)                                                                                                                           |
| Q9ERZ4 | Muscarinic acetylcholine receptor M2 - Mus musculus (Mouse)                                                                                                                            |
| Q80Y86 | Mitogen-activated protein kinase 15 (EC 2.7.11.24) (Extracellular signal-regulated kinase 7) - Mus                                                                                     |
| Q7TPR4 | Alpha-actinin-1 (Alpha-actinin cytoskeletal isoform) (Non-muscle alpha-actinin-1) (F-actin cross-linking protein) - Mus musculus (Mouse)                                               |
| P35922 | Fragile X mental retardation protein 1 homolog (Protein FMR-1) (FMRP) (mFmr1p) - Mus musculus                                                                                          |
| P70694 | Estradiol 17 beta-dehydrogenase 5 (EC 1.1.1.-) (17-beta-HSD 5) - Mus musculus (Mouse)                                                                                                  |
| P00375 | Dihydrofolate reductase (EC 1.5.1.3) - Mus musculus (Mouse)                                                                                                                            |
| P47857 | 6-phosphofructokinase, muscle type (EC 2.7.1.11) (Phosphofructokinase 1) (Phosphohexokinase) (Phosphofructo-1-kinase isozyme A) (PFK-A) (Phosphofructokinase-M) - Mus musculus (Mouse) |
| P62849 | 40S ribosomal protein S24 - Mus musculus (Mouse)                                                                                                                                       |
| Q9DAR7 | Scavenger mRNA decapping enzyme DcpS (EC 3.-.-) (DCS-1) (Hint-related 7meGMP-directed hydrolase) (Histidine triad protein member 5) (HINT-5) - Mus musculus (Mouse)                    |
| Q9D1G1 | Ras-related protein Rab-1B - Mus musculus (Mouse)                                                                                                                                      |
| Q9R1P4 | Proteasome subunit alpha type 1 (EC 3.4.25.1) (Proteasome component C2) (Macropain subunit C2) (Multicatalytic endopeptidase complex subunit C2) (Proteasome nu chain) - Mus musculus  |
| Q11136 | Xaa-Pro dipeptidase (EC 3.4.13.9) (X-Pro dipeptidase) (Proline dipeptidase) (Prolidase) (Imidodipeptidase) (Peptidase 4) - Mus musculus (Mouse)                                        |
| P57722 | Poly(rC)-binding protein 3 (Alpha-CP3) - Mus musculus (Mouse)                                                                                                                          |
| Q715T0 | Thioredoxin domain-containing protein 3 (Spermatid-specific thioredoxin-2) (Sptrx-2) - Mus musculus                                                                                    |
| Q5XPI3 | E3 ubiquitin-protein ligase RNF123 (EC 6.3.2.-) (RING finger protein 123) (Kip1 ubiquitination-promoting complex protein 1) - Mus musculus (Mouse)                                     |
| Q8VCB3 | Glycogen [starch] synthase, liver (EC 2.4.1.11) - Mus musculus (Mouse)                                                                                                                 |
| Q8VHF2 | Mucin and cadherin-like protein precursor (Mu-protocadherin) - Mus musculus (Mouse)                                                                                                    |
| Q8CHH9 | Septin-8 - Mus musculus (Mouse)                                                                                                                                                        |
| P48967 | M-phase inducer phosphatase 3 (EC 3.1.3.48) (Dual specificity phosphatase Cdc25C) - Mus                                                                                                |

|        |                                                                                                                                                                                              |
|--------|----------------------------------------------------------------------------------------------------------------------------------------------------------------------------------------------|
| P00687 | Alpha-amylase 1 precursor (EC 3.2.1.1) (1,4-alpha-D-glucan glucanohydrolase) (Salivary and hepatic alpha-amylase) - Mus musculus (Mouse)                                                     |
| Q99JX1 | Transcription initiation factor TFIIID subunit 11 (Transcription initiation factor TFIIID 28 kDa subunit) (TAF(II)28) (TAFII-28) (TAFII28) (TFIID subunit p30-beta) - Mus musculus (Mouse)   |
| Q99K48 | Non-POU domain-containing octamer-binding protein (NonO protein) - Mus musculus (Mouse)                                                                                                      |
| Q9CX34 | Suppressor of G2 allele of SKP1 homolog - Mus musculus (Mouse)                                                                                                                               |
| P50396 | Rab GDP dissociation inhibitor alpha (Rab GDI alpha) (Guanosine diphosphate dissociation inhibitor 1) (GDI-1) - Mus musculus (Mouse)                                                         |
| P43274 | Histone H1.4 (H1 VAR.2) (H1e) - Mus musculus (Mouse)                                                                                                                                         |
| P14211 | Calreticulin precursor (CRP55) (Calregulin) (HACBP) (ERp60) - Mus musculus (Mouse)                                                                                                           |
| Q9R0X4 | Acyl-coenzyme A thioesterase 9, mitochondrial precursor (EC 3.1.2.-) (Acyl-CoA thioesterase 9) (Acyl-CoA thioester hydrolase 9) (Acyl coenzyme A thioester hydrolase 2) (48 kDa acyl-CoA     |
| Q80WB0 | Uncharacterized protein C20orf195 homolog - Mus musculus (Mouse)                                                                                                                             |
| Q9EQ06 | Dehydrogenase/reductase SDR family member 8 precursor (EC 1.1.1.-) (17-beta-hydroxysteroid dehydrogenase 11) (17-beta-HSD 11) (17-beta-HSD XI) (17betaHSDXI) (17bHSD11)                      |
| P10107 | Annexin A1 (Annexin I) (Lipocortin I) (Calpactin II) (Chromobindin-9) (p35) (Phospholipase A2 inhibitory protein) - Mus musculus (Mouse)                                                     |
| Q91X20 | Set1/Ash2 histone methyltransferase complex subunit ASH2 (ASH2-like protein) - Mus musculus                                                                                                  |
| Q64356 | Seminal vesicle secretory protein 6 precursor (Seminal vesicle secretory protein VI) (SVS VI) (Seminal vesicle protein 6) (SVSP99) - Mus musculus (Mouse)                                    |
| P27612 | Phospholipase A-2-activating protein (PLAP) - Mus musculus (Mouse)                                                                                                                           |
| Q8BG32 | 26S proteasome non-ATPase regulatory subunit 11 (26S proteasome regulatory subunit S9) (26S proteasome regulatory subunit p44.5) - Mus musculus (Mouse)                                      |
| Q88342 | WD repeat protein 1 (Actin-interacting protein 1) (AIP1) - Mus musculus (Mouse)                                                                                                              |
| Q922Y3 | Homer protein homolog 1 (VASP/Ena-related gene up-regulated during seizure and LTP) (Vesl-1) -                                                                                               |
| Q8CHP6 | Polyhomeotic-like protein 3 - Mus musculus (Mouse)                                                                                                                                           |
| Q3UM45 | Protein phosphatase 1 regulatory subunit 7 (Protein phosphatase 1 regulatory subunit 22) - Mus                                                                                               |
| Q9R1T2 | SUMO-activating enzyme subunit 1 (Ubiquitin-like 1-activating enzyme E1A) - Mus musculus                                                                                                     |
| Q9QZD9 | Eukaryotic translation initiation factor 3 subunit 2 (eIF-3 beta) (eIF3 p36) (eIF3i) (TGF-beta receptor-interacting protein 1) (TRIP-1) - Mus musculus (Mouse)                               |
| P10518 | Delta-aminolevulinic acid dehydratase (EC 4.2.1.24) (Porphobilinogen synthase) (ALADH) - Mus                                                                                                 |
| P63330 | Serine/threonine-protein phosphatase 2A catalytic subunit alpha isoform (EC 3.1.3.16) (PP2A-alpha)                                                                                           |
| Q99K90 | Mitogen-activated protein kinase kinase kinase 7-interacting protein 2 (TAK1-binding protein 2)                                                                                              |
| Q35639 | Annexin A3 (Annexin III) (Lipocortin III) (Placental anticoagulant protein III) (PAP-III) (35-alpha                                                                                          |
| Q9ER58 | Testican-2 precursor (SPARC/osteonectin, CWCV, and Kazal-like domains proteoglycan 2) - Mus                                                                                                  |
| P17408 | Oncogene tlm - Mus musculus (Mouse)                                                                                                                                                          |
| Q9DBY5 | Chromobox protein homolog 6 - Mus musculus (Mouse)                                                                                                                                           |
| Q7TM95 | Tigger transposable element-derived protein 3 - Mus musculus (Mouse)                                                                                                                         |
| P09103 | Protein disulfide-isomerase precursor (EC 5.3.4.1) (PDI) (Prolyl 4-hydroxylase subunit beta) (Cellular thyroid hormone-binding protein) (p55) (Erp59) - Mus musculus (Mouse)                 |
| Q35490 | Betaine--homocysteine S-methyltransferase 1 (EC 2.1.1.5) - Mus musculus (Mouse)                                                                                                              |
| P70677 | Caspase-3 precursor (EC 3.4.22.-) (CASP-3) (Apopain) (Cysteine protease CPP32) (Yama protein) (CPP-32) (SREBP cleavage activity 1) (SCA-1) (LICE) [Contains: Caspase-3 p17 subunit; Caspase- |
| Q9CQZ5 | NADH dehydrogenase [ubiquinone] 1 alpha subcomplex subunit 6 (EC 1.6.5.3) (EC 1.6.99.3) (NADH ubiquinone oxidoreductase B14 subunit) (Complex I-B14) (CI-B14) - Mus musculus (Mouse)         |
| Q9JLI8 | Squamous cell carcinoma antigen recognized by T-cells 3 (SART-3) (mSART-3) (Tumor-rejection antigen SART3) - Mus musculus (Mouse)                                                            |
| P58389 | Serine/threonine-protein phosphatase 2A regulatory subunit B~ (PP2A, subunit B~, PR53 isoform) (Phosphotyrosyl phosphatase activator) (PTPA) - Mus musculus (Mouse)                          |
| Q8BWG9 | Calcium release-activated calcium channel protein 1 (Transmembrane protein 142A) (Protein orai-1)                                                                                            |
| Q60668 | Heterogeneous nuclear ribonucleoprotein D0 (hnRNP D0) (AU-rich element RNA-binding protein 1) -                                                                                              |
| Q8BG05 | Heterogeneous nuclear ribonucleoprotein A3 (hnRNP A3) - Mus musculus (Mouse)                                                                                                                 |

|        |                                                                                                                                                                                             |
|--------|---------------------------------------------------------------------------------------------------------------------------------------------------------------------------------------------|
| Q61211 | Ligatin - Mus musculus (Mouse)                                                                                                                                                              |
| Q61897 | Keratin, type I cuticular Ha3 (Hair keratin, type I Ha3) (Keratin 33B) (Fragment) - Mus musculus                                                                                            |
| Q8BHC1 | Ras-related protein Rab-39B - Mus musculus (Mouse)                                                                                                                                          |
| P63087 | Serine/threonine-protein phosphatase PP1-gamma catalytic subunit (EC 3.1.3.16) (PP-1G) (Protein phosphatase 1C catalytic subunit) - Mus musculus (Mouse)                                    |
| Q80TJ7 | PHD finger protein 8 - Mus musculus (Mouse)                                                                                                                                                 |
| Q9CPP6 | NADH dehydrogenase [ubiquinone] 1 alpha subcomplex subunit 5 (EC 1.6.5.3) (EC 1.6.99.3) (NADH ubiquinone oxidoreductase 13 kDa-B subunit) (Complex I-13kD-B) (CI-13kD-B) (Complex I subunit |
| Q8K0V4 | CCR4-NOT transcription complex subunit 3 (CCR4-associated factor 3) - Mus musculus (Mouse)                                                                                                  |
| Q64G17 | Acidic leucine-rich nuclear phosphoprotein 32 family member C - Mus musculus (Mouse)                                                                                                        |
| Q62252 | Sperm surface protein Sp17 (Sperm autoantigenic protein 17) - Mus musculus (Mouse)                                                                                                          |
| Q7TPD3 | Roundabout homolog 2 precursor - Mus musculus (Mouse)                                                                                                                                       |
| O70423 | Membrane copper amine oxidase (EC 1.4.3.6) (Semicarbazide-sensitive amine oxidase) (SSAO) (Vascular adhesion protein 1) (VAP-1) - Mus musculus (Mouse)                                      |
| Q62048 | Astrocytic phosphoprotein PEA-15 - Mus musculus (Mouse)                                                                                                                                     |
| Q6IRU2 | Tropomyosin alpha-4 chain (Tropomyosin-4) - Mus musculus (Mouse)                                                                                                                            |
| P46638 | Ras-related protein Rab-11B - Mus musculus (Mouse)                                                                                                                                          |
| Q8BHD0 | Ras-related protein Rab-39A (Rab-39) - Mus musculus (Mouse)                                                                                                                                 |
| Q923S9 | Ras-related protein Rab-30 - Mus musculus (Mouse)                                                                                                                                           |
| Q8CG50 | Ras-related protein Rab-43 - Mus musculus (Mouse)                                                                                                                                           |
| P26883 | FK506-binding protein 1A (EC 5.2.1.8) (Peptidyl-prolyl cis-trans isomerase) (PPIase) (Rotamase) (12 kDa FKBP) (FKBP-12) (Immunophilin FKBP12) - Mus musculus (Mouse)                        |
| Q61792 | LIM and SH3 domain protein 1 (LASP-1) (MLN 50) - Mus musculus (Mouse)                                                                                                                       |
| P11404 | Fatty acid-binding protein, heart (H-FABP) (Heart-type fatty acid-binding protein) (Mammary-derived growth inhibitor) (MDGI) - Mus musculus (Mouse)                                         |
| Q9D718 | Protein FAM83D - Mus musculus (Mouse)                                                                                                                                                       |
| P14231 | Sodium/potassium-transporting ATPase subunit beta-2 (Sodium/potassium-dependent ATPase beta-2 subunit) (Glial cell adhesion molecule) (AMOG) - Mus musculus (Mouse)                         |
| Q91WW3 | Mas-related G-protein coupled receptor member A3 - Mus musculus (Mouse)                                                                                                                     |
| Q9CS42 | Ribose-phosphate pyrophosphokinase II (EC 2.7.6.1) (Phosphoribosyl pyrophosphate synthetase II)                                                                                             |
| Q9D0J8 | Parathyromosin - Mus musculus (Mouse)                                                                                                                                                       |
| Q9CZT8 | Ras-related protein Rab-3B - Mus musculus (Mouse)                                                                                                                                           |
| Q504M8 | Ras-related protein Rab-26 - Mus musculus (Mouse)                                                                                                                                           |
| P63011 | Ras-related protein Rab-3A - Mus musculus (Mouse)                                                                                                                                           |
| Q99L47 | Hsc70-interacting protein (Hip) (Protein ST13 homolog) (Protein FAM10A1) - Mus musculus (Mouse)                                                                                             |
| P61027 | Ras-related protein Rab-10 - Mus musculus (Mouse)                                                                                                                                           |
| P62746 | Rho-related GTP-binding protein RhoB precursor - Mus musculus (Mouse)                                                                                                                       |
| P62889 | 60S ribosomal protein L30 - Mus musculus (Mouse)                                                                                                                                            |
| P61082 | NEDD8-conjugating enzyme Ubc12 (EC 6.3.2.-) (Ubiquitin-conjugating enzyme E2 M) (NEDD8 protein ligase) (NEDD8 carrier protein) - Mus musculus (Mouse)                                       |
| Q8CDN6 | Thioredoxin-like protein 1 (32 kDa thioredoxin-related protein) - Mus musculus (Mouse)                                                                                                      |
| Q5FW52 | Uncharacterized protein C6orf142 homolog - Mus musculus (Mouse)                                                                                                                             |
| Q9JHJ7 | Testisin precursor (EC 3.4.21.-) (Serine protease 21) (Trypsin 4) - Mus musculus (Mouse)                                                                                                    |
| Q8BK67 | Protein RCC2 - Mus musculus (Mouse)                                                                                                                                                         |
| P21107 | Tropomyosin alpha-3 chain (Tropomyosin-3) (Tropomyosin gamma) - Mus musculus (Mouse)                                                                                                        |
| Q60654 | Killer cell lectin-like receptor 7 (T-cell surface glycoprotein Ly-49G) (Lymphocyte antigen 49g) (Ly-                                                                                       |
| Q922X1 | Heterogeneous nuclear ribonucleoprotein F (hnRNP F) - Mus musculus (Mouse)                                                                                                                  |
| P10922 | Histone H1.0 (Histone H1(0)) (Histone H1~) - Mus musculus (Mouse)                                                                                                                           |
| Q9JKM7 | Ras-related protein Rab-37 - Mus musculus (Mouse)                                                                                                                                           |
| Q91V41 | Ras-related protein Rab-14 - Mus musculus (Mouse)                                                                                                                                           |
| P62823 | Ras-related protein Rab-3C - Mus musculus (Mouse)                                                                                                                                           |
| O70492 | Sorting nexin-3 (SDP3 protein) - Mus musculus (Mouse)                                                                                                                                       |

|        |                                                                                                                                                                                           |
|--------|-------------------------------------------------------------------------------------------------------------------------------------------------------------------------------------------|
| Q9CXR4 | Phosphatidylinositol N-acetylglucosaminyltransferase subunit C (EC 2.4.1.198) (Phosphatidylinositol-glycan biosynthesis class C protein) (PIG-C) - Mus musculus (Mouse)                   |
| Q91ZR3 | Host cell factor-binding transcription factor Zhangfei (HCF-binding transcription factor Zhangfei) (Tyrosine kinase-associated leucine zipper protein LAZip) - Mus musculus (Mouse)       |
| O35963 | Ras-related protein Rab-33B - Mus musculus (Mouse)                                                                                                                                        |
| Q9D9B4 | Uncharacterized protein C10orf11 homolog - Mus musculus (Mouse)                                                                                                                           |
| P61750 | ADP-ribosylation factor 4 - Mus musculus (Mouse)                                                                                                                                          |
| Q9CQM9 | Thioredoxin-like protein 2 (PKC-interacting cousin of thioredoxin) (PKC-theta-interacting protein) (PKCq-interacting protein) - Mus musculus (Mouse)                                      |
| Q01768 | Nucleoside diphosphate kinase B (EC 2.7.4.6) (NDK B) (NDP kinase B) (nm23-M2) (P18) - Mus                                                                                                 |
| P48036 | Annexin A5 (Annexin V) (Lipocortin V) (Endonexin II) (Calphobindin I) (CBP-I) (Placental anticoagulant protein I) (PAP-I) (PP4) (Thromboplastin inhibitor) (Vascular anticoagulant-alpha) |
| P35278 | Ras-related protein Rab-5C - Mus musculus (Mouse)                                                                                                                                         |
| P61205 | ADP-ribosylation factor 3 - Mus musculus (Mouse)                                                                                                                                          |
| P15331 | Peripherin - Mus musculus (Mouse)                                                                                                                                                         |
| Q99PW8 | Kinesin-like protein KIF17 (MmKIF17) - Mus musculus (Mouse)                                                                                                                               |
| Q91VE3 | Kallikrein-7 precursor (EC 3.4.21.117) (Stratum corneum chymotryptic enzyme) (Thymopsin) (Serine protease 6) - Mus musculus (Mouse)                                                       |
| Q3UA16 | Kinetochore protein Spc25 - Mus musculus (Mouse)                                                                                                                                          |
| Q7SIG6 | Development and differentiation-enhancing factor 2 (Pyk2 C-terminus-associated protein) (PAP) (Paxillin-associated protein with ARFGAP activity 3) (PAG3) - Mus musculus (Mouse)          |
| O89053 | Coronin-1A (Coronin-like protein p57) (Coronin-like protein A) (Clipin-A) (Tryptophan aspartate-containing coat protein) (TACO) - Mus musculus (Mouse)                                    |
| P15864 | Histone H1.2 (H1 VAR.1) (H1c) - Mus musculus (Mouse)                                                                                                                                      |
| Q61037 | Tuberin (Tuberous sclerosis 2 homolog protein) - Mus musculus (Mouse)                                                                                                                     |
| Q9Z2T6 | Keratin type II cuticular Hb5 (Type II hair keratin Hb5) (Keratin-85) (K85) - Mus musculus (Mouse)                                                                                        |
| Q8BGY2 | Eukaryotic translation initiation factor 5A-2 (eIF-5A-2) (eIF-5A2) (Eukaryotic initiation factor 5A                                                                                       |
| Q9R1P3 | Proteasome subunit beta type 2 (EC 3.4.25.1) (Proteasome component C7-I) (Macropain subunit C7-I) (Multicatalytic endopeptidase complex subunit C7-I) - Mus musculus (Mouse)              |
| Q9D0R2 | Threonyl-tRNA synthetase, cytoplasmic (EC 6.1.1.3) (Threonine--tRNA ligase) (ThrRS) - Mus                                                                                                 |
| O35066 | Kinesin-like protein KIF3C - Mus musculus (Mouse)                                                                                                                                         |
| P11679 | Keratin, type II cytoskeletal 8 (Cytokeratin-8) (CK-8) (Keratin-8) (K8) (Cytokeratin endo A) - Mus                                                                                        |
| Q69Z69 | N-acetyltransferase ESCO1 (EC 2.3.1.-) (Establishment of cohesion 1 homolog 1) (ECO1 homolog                                                                                              |
| P97861 | Keratin type II cuticular Hb6 (Type II hair keratin Hb6) (Keratin-86) (K86) - Mus musculus (Mouse)                                                                                        |
| Q8VDX6 | Transmembrane protein 5 - Mus musculus (Mouse)                                                                                                                                            |
| Q91Y97 | Fructose-bisphosphate aldolase B (EC 4.1.2.13) (Liver-type aldolase) (Aldolase 2) - Mus musculus                                                                                          |
| Q99020 | Heterogeneous nuclear ribonucleoprotein A/B (hnRNP A/B) (CArG-binding factor-A) (CBF-A) - Mus                                                                                             |
| Q80U62 | Uncharacterized protein KIAA0226 - Mus musculus (Mouse)                                                                                                                                   |
| Q61553 | Fascin (Singed-like protein) - Mus musculus (Mouse)                                                                                                                                       |
| Q80YX1 | Tenascin precursor (TN) (Tenascin-C) (TN-C) (Hexabrachion) - Mus musculus (Mouse)                                                                                                         |
| Q9R244 | Short transient receptor potential channel 2 (TrpC2) (mTrp2) - Mus musculus (Mouse)                                                                                                       |
| Q9JJZ2 | Tubulin alpha-8 chain (Alpha-tubulin 8) - Mus musculus (Mouse)                                                                                                                            |
| Q640M1 | U3 small nucleolar RNA-associated protein 14 homolog A (Juvenile spermatogonial depletion-like X-linked protein) (Jsd-like X-linked protein) - Mus musculus (Mouse)                       |
| Q62318 | Transcription intermediary factor 1-beta (TIF1-beta) (Tripartite motif-containing protein 28) (KRAB-A-interacting protein) (KRIP-1) - Mus musculus (Mouse)                                |
| Q3TGF2 | Protein FAM107B - Mus musculus (Mouse)                                                                                                                                                    |
| P34022 | Ran-specific GTPase-activating protein (Ran-binding protein 1) (RANBP1) (Hpal1 tiny fragments locus 9a protein) - Mus musculus (Mouse)                                                    |
| P47878 | Insulin-like growth factor-binding protein 3 precursor (IGFBP-3) (IBP-3) (IGF-binding protein 3) - Mus                                                                                    |
| Q9WTR1 | Transient receptor potential cation channel subfamily V member 2 (TrpV2) (osm-9-like TRP channel 2) (OTRPC2) (Growth factor-regulated calcium channel) (GRC) - Mus musculus (Mouse)       |

|        |                                                                                                                                                                                                 |
|--------|-------------------------------------------------------------------------------------------------------------------------------------------------------------------------------------------------|
| Q55029 | Coatomer subunit beta~ (Beta~-coat protein) (Beta~-COP) (p102) - Mus musculus (Mouse)                                                                                                           |
| P63028 | Translationally-controlled tumor protein (TCTP) (p23) (21 kDa polypeptide) (p21) - Mus musculus                                                                                                 |
| Q9R155 | Pendrin (Sodium-independent chloride/iodide transporter) (Solute carrier family 26 member 4) - Mus                                                                                              |
| Q61481 | Calcium/calmodulin-dependent 3~,5~-cyclic nucleotide phosphodiesterase 1A (EC 3.1.4.17) (Cam-PDE 1A) (61 kDa Cam-PDE) - Mus musculus (Mouse)                                                    |
| Q99MS8 | Tubulin polyglutamylase complex subunit 1 (PGs1) (p32) - Mus musculus (Mouse)                                                                                                                   |
| Q8R1B5 | Complexin-3 (Complexin III) (CPX III) - Mus musculus (Mouse)                                                                                                                                    |
| O35239 | Tyrosine-protein phosphatase non-receptor type 9 (EC 3.1.3.48) (Protein-tyrosine phosphatase MEG2) (PTPase-MEG2) - Mus musculus (Mouse)                                                         |
| Q9WVA3 | Mitotic checkpoint protein BUB3 (WD repeat type I transmembrane protein A72.5) - Mus musculus                                                                                                   |
| Q9JJU8 | SH3 domain-binding glutamic acid-rich-like protein - Mus musculus (Mouse)                                                                                                                       |
| Q08024 | Core-binding factor subunit beta (CBF-beta) (Polyomavirus enhancer-binding protein 2 beta subunit) (PEBP2-beta) (PEA2-beta) (SL3-3 enhancer factor 1 beta subunit) (SL3/AKV core-binding factor |
| P12815 | Programmed cell death protein 6 (Probable calcium-binding protein ALG-2) (PMP41) (ALG-257) -                                                                                                    |
| P04104 | Keratin, type II cytoskeletal 1 (Cytokeratin-1) (CK-1) (Keratin-1) (K1) (67 kDa cytokeratin) - Mus                                                                                              |
| P10639 | Thioredoxin (Trx) (ATL-derived factor) (ADF) - Mus musculus (Mouse)                                                                                                                             |
| Q3TCT4 | Ectonucleoside triphosphate diphosphohydrolase 7 (EC 3.6.1.-) (NTPDase 7) (Lysosomal apyrase-like protein 1) - Mus musculus (Mouse)                                                             |
| P97311 | DNA replication licensing factor MCM6 (Mis5 homolog) - Mus musculus (Mouse)                                                                                                                     |
| O88705 | Potassium/sodium hyperpolarization-activated cyclic nucleotide-gated channel 3 (Hyperpolarization-activated cation channel 3) (HAC-3) - Mus musculus (Mouse)                                    |
| Q8BTM8 | Filamin-A (Alpha-filamin) (Filamin-1) (Endothelial actin-binding protein) (Actin-binding protein 280) (ABP-280) (Nonmuscle filamin) - Mus musculus (Mouse)                                      |
| Q9CXW3 | Calcyclin-binding protein (CacyBP) (Siah-interacting protein) - Mus musculus (Mouse)                                                                                                            |
| P06745 | Glucose-6-phosphate isomerase (EC 5.3.1.9) (GPI) (Phosphoglucose isomerase) (PGI) (Phosphohexose isomerase) (PHI) (Neuroleukin) (NLK) - Mus musculus (Mouse)                                    |
| Q8R3C6 | Probable RNA-binding protein 19 (RNA-binding motif protein 19) - Mus musculus (Mouse)                                                                                                           |
| Q9CQE1 | Protein NipSnap3A (NipSnap-related protein) - Mus musculus (Mouse)                                                                                                                              |
| Q99N50 | Synaptotagmin-like protein 2 (Exophilin-4) - Mus musculus (Mouse)                                                                                                                               |
| Q7TSG3 | F-box only protein 5 (Early mitotic inhibitor 1) - Mus musculus (Mouse)                                                                                                                         |
| Q8BGQ1 | Uncharacterized protein C14orf133 homolog - Mus musculus (Mouse)                                                                                                                                |
| Q62159 | Rho-related GTP-binding protein RhoC precursor (Silica-induced gene 61 protein) (SIG-61) - Mus                                                                                                  |
| P56716 | Oxygen-regulated protein 1 (Retinitis pigmentosa RP1 protein homolog) - Mus musculus (Mouse)                                                                                                    |
| Q8K2P1 | Uncharacterized protein C9orf150 homolog - Mus musculus (Mouse)                                                                                                                                 |
| Q8BYC6 | Serine/threonine-protein kinase TAO3 (EC 2.7.11.1) (Thousand and one amino acid protein 3) - Mus                                                                                                |
| P56198 | Cell death activator CIDE-3 (Cell death-inducing DFFA-like effector protein C) (Fat-specific protein                                                                                            |
| O35381 | Acidic leucine-rich nuclear phosphoprotein 32 family member A (Potent heat-stable protein phosphatase 2A inhibitor I1PP2A) (Acidic nuclear phosphoprotein pp32) (Leucine-rich acidic nuclear    |
| Q64674 | Spermidine synthase (EC 2.5.1.16) (Putrescine aminopropyltransferase) (SPDSY) - Mus musculus                                                                                                    |
| P03987 | Ig gamma-3 chain C region, membrane-bound form - Mus musculus (Mouse)                                                                                                                           |
| Q61414 | Keratin, type I cytoskeletal 15 (Cytokeratin-15) (CK-15) (Keratin-15) (K15) - Mus musculus (Mouse)                                                                                              |
| P62962 | Profilin-1 (Profilin I) - Mus musculus (Mouse)                                                                                                                                                  |
| P18760 | Cofilin-1 (Cofilin, non-muscle isoform) - Mus musculus (Mouse)                                                                                                                                  |
| P17742 | Peptidyl-prolyl cis-trans isomerase A (EC 5.2.1.8) (PPIase A) (Rotamase A) (Cyclophilin A) (Cyclosporin A-binding protein) (SP18) - Mus musculus (Mouse)                                        |
| Q8QZR5 | Alanine aminotransferase 1 (EC 2.6.1.2) (ALT1) (Glutamic--pyruvic transaminase 1) (GPT 1) (Glutamic--alanine transaminase 1) - Mus musculus (Mouse)                                             |
| Q9R117 | Non-receptor tyrosine-protein kinase TYK2 (EC 2.7.10.2) - Mus musculus (Mouse)                                                                                                                  |
| Q9Z1R2 | Large proline-rich protein BAT3 (HLA-B-associated transcript 3) - Mus musculus (Mouse)                                                                                                          |
| Q9D009 | Lipoyltransferase 1, mitochondrial precursor (EC 6.-.-.-) (Lipoate-protein ligase) (Lipoate biosynthesis protein) (Lipoyl ligase) - Mus musculus (Mouse)                                        |
| Q8BFQ9 | Kelch domain-containing protein 5 - Mus musculus (Mouse)                                                                                                                                        |

|        |                                                                                                                                                                                                         |
|--------|---------------------------------------------------------------------------------------------------------------------------------------------------------------------------------------------------------|
| Q8R1S0 | Ubiquinone biosynthesis monooxygenase COQ6 (EC 1.14.13.-) - Mus musculus (Mouse)                                                                                                                        |
| Q9ERK4 | Exportin-2 (Exp2) (Importin-alpha re-exporter) (Chromosome segregation 1-like protein) - Mus                                                                                                            |
| Q9Z129 | ATP-dependent DNA helicase Q1 (EC 3.6.1.-) (DNA-dependent ATPase Q1) - Mus musculus                                                                                                                     |
| P52480 | Pyruvate kinase isozyme M2 (EC 2.7.1.40) - Mus musculus (Mouse)                                                                                                                                         |
| Q8CGP2 | Histone H2B type 1-P - Mus musculus (Mouse)                                                                                                                                                             |
| P35980 | 60S ribosomal protein L18 - Mus musculus (Mouse)                                                                                                                                                        |
| P63143 | Voltage-gated potassium channel subunit beta-1 (K(+)) channel subunit beta-1) (Kv-beta-1) - Mus                                                                                                         |
| Q8BYW1 | Rho GTPase-activating protein 25 - Mus musculus (Mouse)                                                                                                                                                 |
| P35175 | Stefin-3 - Mus musculus (Mouse)                                                                                                                                                                         |
| P62960 | Nuclease sensitive element-binding protein 1 (Y-box-binding protein 1) (Y-box transcription factor) (YB-1) (CCAAT-binding transcription factor I subunit A) (CBF-A) (Enhancer factor I subunit A) (EFl- |
| Q9Z309 | Calcium and integrin-binding protein 2 (Kinase-interacting protein 2) (KIP 2) - Mus musculus (Mouse)                                                                                                    |
| P57776 | Elongation factor 1-delta (EF-1-delta) - Mus musculus (Mouse)                                                                                                                                           |
| Q9WTL7 | Acyl-protein thioesterase 2 (EC 3.1.2.-) (Lysophospholipase II) (Lysophospholipase 2) (mLyso II) -                                                                                                      |
| P62806 | Histone H4 - Mus musculus (Mouse)                                                                                                                                                                       |
| Q922U2 | Keratin, type II cytoskeletal 5 (Cytokeratin-5) (CK-5) (Keratin-5) (K5) - Mus musculus (Mouse)                                                                                                          |
| Q64475 | Histone H2B type 1-B (h2B-143) - Mus musculus (Mouse)                                                                                                                                                   |
| P15532 | Nucleoside diphosphate kinase A (EC 2.7.4.6) (NDK A) (NDP kinase A) (Tumor metastatic process-associated protein) (Metastasis inhibition factor NM23) (NDPK-A) (nm23-M1) - Mus musculus                 |
| Q8BHG1 | Nardilysin precursor (EC 3.4.24.61) (N-arginine dibasic convertase) (NRD convertase) (NRD-C) -                                                                                                          |
| Q8VDM4 | 26S proteasome non-ATPase regulatory subunit 2 (26S proteasome regulatory subunit RPN1) (26S proteasome regulatory subunit S2) (26S proteasome subunit p97) - Mus musculus (Mouse)                      |
| Q8BGT5 | Alanine aminotransferase 2 (EC 2.6.1.2) (ALT2) (Glutamic--pyruvic transaminase 2) (GPT 2) (Glutamic--alanine transaminase 2) - Mus musculus (Mouse)                                                     |
| P19157 | Glutathione S-transferase P 1 (EC 2.5.1.18) (GST YF-YF) (GST-piB) (GST class-pi) (Gst P1) (Preadipocyte growth factor) - Mus musculus (Mouse)                                                           |
| Q8CCP0 | Serologically defined colon cancer antigen 1 - Mus musculus (Mouse)                                                                                                                                     |
| Q80Y17 | Lethal(2) giant larvae protein homolog 1 (LLGL) (Mlg1) (Mgl-1) - Mus musculus (Mouse)                                                                                                                   |
| Q501J6 | Probable ATP-dependent RNA helicase DDX17 (EC 3.6.1.-) (DEAD box protein 17) - Mus musculus                                                                                                             |
| Q9D8W5 | 26S proteasome non-ATPase regulatory subunit 12 (26S proteasome regulatory subunit p55) - Mus                                                                                                           |
| P63001 | Ras-related C3 botulinum toxin substrate 1 precursor (p21-Rac1) - Mus musculus (Mouse)                                                                                                                  |
| Q6ZWX6 | Eukaryotic translation initiation factor 2 subunit 1 (Eukaryotic translation initiation factor 2 subunit alpha) (eIF-2-alpha) (EIF-2alpha) (EIF-2A) - Mus musculus (Mouse)                              |
| Q61990 | Poly(rC)-binding protein 2 (Alpha-CP2) (Putative heterogeneous nuclear ribonucleoprotein X) (hnRNP X) (CTBP) (CBP) - Mus musculus (Mouse)                                                               |
| P62082 | 40S ribosomal protein S7 - Mus musculus (Mouse)                                                                                                                                                         |
| P14824 | Annexin A6 (Annexin VI) (Lipocortin VI) (P68) (P70) (Protein III) (Chromobindin-20) (67 kDa calelectrin) (Calphobindin-II) (CPB-II) - Mus musculus (Mouse)                                              |
| Q9Z1S0 | Mitotic checkpoint serine/threonine-protein kinase BUB1 beta (EC 2.7.11.1) (MAD3/BUB1-related protein kinase) (Mitotic checkpoint kinase MAD3L) - Mus musculus (Mouse)                                  |
| P02551 | Tubulin alpha-1 chain (Alpha-tubulin 1) (Alpha-tubulin isotype M-alpha-1) - Mus musculus (Mouse)                                                                                                        |
| P63158 | High mobility group protein B1 (High mobility group protein 1) (HMG-1) - Mus musculus (Mouse)                                                                                                           |
| P83741 | Serine/threonine-protein kinase WNK1 (EC 2.7.11.1) (Protein kinase with no lysine 1) (Protein kinase, lysine-deficient 1) - Mus musculus (Mouse)                                                        |
| Q99K85 | Phosphoserine aminotransferase (EC 2.6.1.52) (PSAT) (Endometrial progesterone-induced protein)                                                                                                          |
| Q7TQG1 | Pleckstrin homology domain-containing family A member 6 (Phosphoinositol 3-phosphate-binding protein 3) (PEPP-3) - Mus musculus (Mouse)                                                                 |
| P50247 | Adenosylhomocysteinase (EC 3.3.1.1) (S-adenosyl-L-homocysteine hydrolase) (AdoHcyase) (Liver copper-binding protein) (CUBP) - Mus musculus (Mouse)                                                      |
| Q9CQY5 | Implantation-associated protein precursor (IAP) (Magnesium transporter protein 1) (MagT1) - Mus                                                                                                         |
| Q8BUG5 | Calcyphosin-2 (Calcyphosine-2) - Mus musculus (Mouse)                                                                                                                                                   |
| Q62522 | Zona pellucida-binding protein 1 precursor (Sp38) - Mus musculus (Mouse)                                                                                                                                |



|        |                                                                                                                                                                                                          |
|--------|----------------------------------------------------------------------------------------------------------------------------------------------------------------------------------------------------------|
| Q3UDW8 | Heparan-alpha-glucosaminide N-acetyltransferase (EC 2.3.1.78) (Transmembrane protein 76) - Mus                                                                                                           |
| Q7TN83 | Synaptotagmin-16 (Synaptotagmin XIV-related protein) (Synaptotagmin 14-like protein) - Mus                                                                                                               |
| Q9D1H6 | UPF0240 protein C6orf66 homolog - Mus musculus (Mouse)                                                                                                                                                   |
| P16045 | Galectin-1 (Lectin galactoside-binding soluble 1) (Beta-galactoside-binding lectin L-14-I) (Lactose-binding lectin 1) (S-Lac lectin 1) (Galaptin) (14 kDa lectin) - Mus musculus (Mouse)                 |
| Q60695 | Ral guanine nucleotide dissociation stimulator-like 1 (RalGDS-like 1) - Mus musculus (Mouse)                                                                                                             |
| O55142 | 60S ribosomal protein L35a - Mus musculus (Mouse)                                                                                                                                                        |
| Q8K386 | Ras-related protein Rab-15 - Mus musculus (Mouse)                                                                                                                                                        |
| P61982 | 14-3-3 protein gamma - Mus musculus (Mouse)                                                                                                                                                              |
| Q60952 | Centrosome-associated protein CEP250 (Centrosomal protein 2) (Centrosomal Nek2-associated protein 1) (C-Nap1) (Intranuclear matrix protein) - Mus musculus (Mouse)                                       |
| P53657 | Pyruvate kinase isozymes R/L (EC 2.7.1.40) (L-PK) - Mus musculus (Mouse)                                                                                                                                 |
| P97868 | Retinoblastoma-binding protein 6 (p53-associated cellular protein of testis) (Proliferation potential-related protein) (Protein P2P-R) - Mus musculus (Mouse)                                            |
| Q9QZ39 | Alpha-N-acetylgalactosaminide alpha-2,6-sialyltransferase 1 (EC 2.4.99.3) (GalNAc alpha-2,6-sialyltransferase I) (ST6GalNAc I) (Sialyltransferase 7A) - Mus musculus (Mouse)                             |
| P99026 | Proteasome subunit beta type 4 precursor (EC 3.4.25.1) (Proteasome beta chain) (Macropain beta chain) (Multicatalytic endopeptidase complex beta chain) (Proteasome chain 3) - Mus musculus              |
| Q3THW5 | Histone H2AV (H2A.F/Z) - Mus musculus (Mouse)                                                                                                                                                            |
| P35761 | Dual specificity protein kinase TTK (EC 2.7.12.1) (ESK) (PYT) - Mus musculus (Mouse)                                                                                                                     |
| P60335 | Poly(rC)-binding protein 1 (Alpha-CP1) (hnRNP-E1) - Mus musculus (Mouse)                                                                                                                                 |
| Q9WVP9 | Interferon-induced GTP-binding protein Mx2 - Mus musculus (Mouse)                                                                                                                                        |
| O35711 | Liprin-beta-2 (Protein tyrosine phosphatase receptor type f polypeptide-interacting protein-binding protein 2) (PTPRF-interacting protein-binding protein 2) (Coiled-coil-like protein 1) - Mus musculus |
| P12813 | Orphan nuclear receptor NR4A1 (Orphan nuclear receptor HMR) (Nuclear hormone receptor NUR/77) (N10 nuclear protein) - Mus musculus (Mouse)                                                               |
| Q00342 | FL cytokine receptor precursor (EC 2.7.10.1) (Tyrosine-protein kinase receptor flk-2) (Fetal liver kinase 2) (Tyrosine-protein kinase FLT3) (CD135 antigen) - Mus musculus (Mouse)                       |
| O70251 | Elongation factor 1-beta (EF-1-beta) - Mus musculus (Mouse)                                                                                                                                              |
| Q8BV14 | Dihydropteridine reductase (EC 1.5.1.34) (HDHPR) (Quinoid dihydropteridine reductase) - Mus                                                                                                              |
| P07744 | Keratin, type II cytoskeletal 4 (Cytokeratin-4) (CK-4) (Keratin-4) (K4) (Cytoskeletal 57 kDa keratin) -                                                                                                  |
| Q9Z1F9 | SUMO-activating enzyme subunit 2 (EC 6.3.2.-) (Ubiquitin-like 1-activating enzyme E1B) (Anthracycline-associated resistance ARX) - Mus musculus (Mouse)                                                  |
| O08677 | Kininogen-1 precursor [Contains: Kininogen-1 heavy chain; Bradykinin; Kininogen-1 light chain] -                                                                                                         |
| Q8VHX6 | Filamin-C (Gamma-filamin) (Filamin-2) (FLN-C) (Actin-binding-like protein) (ABP-L) (ABP-280-like                                                                                                         |
| P68510 | 14-3-3 protein eta - Mus musculus (Mouse)                                                                                                                                                                |
| P70696 | Histone H2B type 1-A (Histone H2B, testis) (Testis-specific histone H2B) - Mus musculus (Mouse)                                                                                                          |
| P05214 | Tubulin alpha-3/alpha-7 chain (Alpha-tubulin 3/7) (Alpha-tubulin isotype M-alpha-3/7) - Mus                                                                                                              |
| P27641 | ATP-dependent DNA helicase 2 subunit 2 (EC 3.6.1.-) (ATP-dependent DNA helicase II 80 kDa subunit) (Ku autoantigen protein p86 homolog) (Ku80) (CTC box-binding factor 85 kDa subunit)                   |
| P17047 | Lysosome-associated membrane glycoprotein 2 precursor (LAMP-2) (Lysosomal membrane glycoprotein type B) (LGP-B) (CD107b antigen) - Mus musculus (Mouse)                                                  |
| Q61937 | Nucleophosmin (NPM) (Nucleolar phosphoprotein B23) (Numatrin) (Nucleolar protein NO38) - Mus                                                                                                             |
| O08807 | Peroxiredoxin-4 (EC 1.11.1.15) (Prx-IV) (Thioredoxin peroxidase AO372) (Thioredoxin-dependent peroxide reductase A0372) (Antioxidant enzyme AOE372) - Mus musculus (Mouse)                               |
| Q99M73 | Keratin type II cuticular Hb4 (Type II hair keratin Hb4) (Keratin-84) (K84) (65 kDa type II keratin) -                                                                                                   |
| Q8K298 | Actin-binding protein anillin - Mus musculus (Mouse)                                                                                                                                                     |
| P70338 | Zinc finger protein Gfi-1 (Growth factor independence 1) - Mus musculus (Mouse)                                                                                                                          |
| Q61789 | Laminin subunit alpha-3 precursor (Nicein subunit alpha) - Mus musculus (Mouse)                                                                                                                          |
| Q14CH7 | Probable alanyl-tRNA synthetase, mitochondrial precursor (EC 6.1.1.7) (Alanine--tRNA ligase) (AlaRS) (Alanyl-tRNA synthetase-like) - Mus musculus (Mouse)                                                |
| Q640P2 | Angiopietin-related protein 1 precursor (Angiopietin-like 1) - Mus musculus (Mouse)                                                                                                                      |

|        |                                                                                                                                                                                                    |
|--------|----------------------------------------------------------------------------------------------------------------------------------------------------------------------------------------------------|
| Q9WTX2 | Interferon-inducible double stranded RNA-dependent protein kinase activator A (Protein kinase, interferon-inducible double stranded RNA-dependent activator) (Protein activator of the interferon- |
| Q9EPL8 | Importin-7 (Imp7) (Ran-binding protein 7) (RanBP7) - Mus musculus (Mouse)                                                                                                                          |
| Q6P8J2 | Diamine acetyltransferase 2 (EC 2.3.1.57) (Spermidine/spermine N(1)-acetyltransferase 2) (Polyamine N-acetyltransferase 2) - Mus musculus (Mouse)                                                  |
| P47867 | Secretogranin-3 precursor (Secretogranin III) (SgIII) - Mus musculus (Mouse)                                                                                                                       |
| Q9ERU9 | E3 SUMO-protein ligase RanBP2 (Ran-binding protein 2) - Mus musculus (Mouse)                                                                                                                       |
| P35700 | Peroxiredoxin-1 (EC 1.11.1.15) (Thioredoxin peroxidase 2) (Thioredoxin-dependent peroxide reductase 2) (Osteoblast-specific factor 3) (OSF-3) (Macrophage 23 kDa stress protein) - Mus             |
| P70296 | Phosphatidylethanolamine-binding protein 1 (PEBP-1) (HCNPpp) [Contains: Hippocampal cholinergic neurostimulating peptide (HCNP)] - Mus musculus (Mouse)                                            |
| Q9Z277 | Bromodomain adjacent to zinc finger domain protein 1B (Williams-Beuren syndrome chromosome region 9 protein homolog) (WBRS9) - Mus musculus (Mouse)                                                |
| Q921C5 | Protein bicaudal D homolog 2 (Bic-D 2) - Mus musculus (Mouse)                                                                                                                                      |
| P70168 | Importin beta-1 subunit (Karyopherin beta-1 subunit) (Nuclear factor P97) (Pore targeting complex 97 kDa subunit) (PTAC97) (SCG) - Mus musculus (Mouse)                                            |
| Q5SXJ3 | Fanconi anemia group J protein homolog (EC 3.6.1.-) (ATP-dependent RNA helicase BRIP1) (Protein FACJ) (BRCA1-interacting protein C-terminal helicase 1) (BRCA1-interacting protein 1)              |
| Q61595 | Kinectin - Mus musculus (Mouse)                                                                                                                                                                    |
| P63321 | Ras-related protein Ral-A - Mus musculus (Mouse)                                                                                                                                                   |
| Q61846 | Maternal embryonic leucine zipper kinase (EC 2.7.11.1) (Protein kinase PK38) (mPK38) - Mus                                                                                                         |
| Q8CIM1 | Leucine-rich repeat-containing protein 45 - Mus musculus (Mouse)                                                                                                                                   |
| Q7TQ07 | DNA polymerase nu (EC 2.7.7.7) - Mus musculus (Mouse)                                                                                                                                              |
| Q61753 | D-3-phosphoglycerate dehydrogenase (EC 1.1.1.95) (3-PGDH) (A10) - Mus musculus (Mouse)                                                                                                             |
| P63163 | Small nuclear ribonucleoprotein-associated protein N (snRNP-N) (Sm protein N) (Sm-N) (SmN) (Sm-D) (Tissue-specific-splicing protein) - Mus musculus (Mouse)                                        |
| P47753 | F-actin capping protein subunit alpha-1 (CapZ alpha-1) - Mus musculus (Mouse)                                                                                                                      |
| Q80X90 | Filamin-B (FLN-B) (Beta-filamin) (Actin-binding-like protein) (ABP-280-like protein) - Mus musculus                                                                                                |
| Q07133 | Histone H1t (Testicular H1 histone) - Mus musculus (Mouse)                                                                                                                                         |
| P05064 | Fructose-bisphosphate aldolase A (EC 4.1.2.13) (Muscle-type aldolase) (Aldolase 1) - Mus                                                                                                           |
| Q91YK0 | Leucine-rich repeat-containing protein 49 (Tubulin polyglutamylase complex subunit 4) (PGs4) (p79)                                                                                                 |
| Q61496 | Probable ATP-dependent RNA helicase DDX4 (EC 3.6.1.-) (DEAD box protein 4) (VASA homolog)                                                                                                          |
| O70456 | 14-3-3 protein sigma (Stratifin) - Mus musculus (Mouse)                                                                                                                                            |
| Q923B1 | Lariat debranching enzyme (EC 3.1.-.-) - Mus musculus (Mouse)                                                                                                                                      |
| Q62093 | Splicing factor, arginine/serine-rich 2 (Splicing factor SC35) (SC-35) (Splicing component, 35 kDa) (Protein PR264) (Putative myelin regulatory factor 1) (MRF-1) - Mus musculus (Mouse)           |
| P27661 | Histone H2A.x (H2a/x) - Mus musculus (Mouse)                                                                                                                                                       |
| P20152 | Vimentin - Mus musculus (Mouse)                                                                                                                                                                    |
| P28271 | Iron-responsive element-binding protein 1 (IRE-BP 1) (Iron regulatory protein 1) (IRP1) (Ferritin repressor protein) (Aconitate hydratase) (EC 4.2.1.3) (Citrate hydro-lyase) (Aconitase) - Mus    |
| P63101 | 14-3-3 protein zeta/delta (Protein kinase C inhibitor protein 1) (KCIP-1) (SEZ-2) - Mus musculus                                                                                                   |
| Q3UKC1 | Tax1-binding protein 1 homolog - Mus musculus (Mouse)                                                                                                                                              |
| Q63ZW7 | InaD-like protein (Inadl protein) (Pals1-associated tight junction protein) (Protein associated to tight junctions) (Channel-interacting PDZ domain-containing protein) - Mus musculus (Mouse)     |
| P17183 | Gamma-enolase (EC 4.2.1.11) (2-phospho-D-glycerate hydro-lyase) (Neural enolase) (Neuron-specific enolase) (NSE) (Enolase 2) - Mus musculus (Mouse)                                                |
| Q60716 | Prolyl 4-hydroxylase subunit alpha-2 precursor (EC 1.14.11.2) (4-PH alpha-2) (Procollagen-proline,2-oxoglutarate-4-dioxygenase alpha-2 subunit) - Mus musculus (Mouse)                             |
| O09010 | Beta-1,3-N-acetylglucosaminyltransferase lunatic fringe (EC 2.4.1.222) (O-fucosylpeptide 3-beta-N-acetylglucosaminyltransferase) - Mus musculus (Mouse)                                            |
| Q80X50 | Ubiquitin-associated protein 2-like - Mus musculus (Mouse)                                                                                                                                         |
| P61028 | Ras-related protein Rab-8B - Mus musculus (Mouse)                                                                                                                                                  |

|        |                                                                                                                                                                                               |
|--------|-----------------------------------------------------------------------------------------------------------------------------------------------------------------------------------------------|
| P31001 | Desmin - Mus musculus (Mouse)                                                                                                                                                                 |
| Q811J3 | Iron-responsive element-binding protein 2 (IRE-BP 2) (Iron regulatory protein 2) (IRP2) - Mus                                                                                                 |
| Q61316 | Heat shock 70 kDa protein 4 (Heat shock 70-related protein APG-2) - Mus musculus (Mouse)                                                                                                      |
| Q80Z38 | SH3 and multiple ankyrin repeat domains protein 2 (Shank2) (Cortactin-binding protein 1) (CortBP1) -                                                                                          |
| Q8BU30 | Isoleucyl-tRNA synthetase, cytoplasmic (EC 6.1.1.5) (Isoleucine--tRNA ligase) (IleRS) (IRS) - Mus                                                                                             |
| Q8R2X8 | Golgin 45 (Basic leucine zipper nuclear factor 1) - Mus musculus (Mouse)                                                                                                                      |
| Q61466 | SWI/SNF-related matrix-associated actin-dependent regulator of chromatin subfamily D member 1 (SWI/SNF complex 60 kDa subunit) (60 kDa BRG-1/Brm-associated factor subunit A) (BRG1-          |
| Q8BGD9 | Eukaryotic translation initiation factor 4B (eIF-4B) - Mus musculus (Mouse)                                                                                                                   |
| P51880 | Fatty acid-binding protein, brain (B-FABP) (Brain lipid-binding protein) (BLBP) - Mus musculus                                                                                                |
| Q2EMV9 | Poly [ADP-ribose] polymerase 14 (EC 2.4.2.30) (PARP-14) (Collaborator of STAT6) (CoaSt6) - Mus                                                                                                |
| Q8VII8 | Mineralocorticoid receptor (MR) - Mus musculus (Mouse)                                                                                                                                        |
| P59270 | Galactosylgalactosylxylosylprotein 3-beta-glucuronosyltransferase 2 (EC 2.4.1.135) (Beta-1,3-glucuronosyltransferase 2) (Glucuronosyltransferase-S) (GlcAT-S) (UDP-glucuronosyltransferase-S) |
| Q3UBX0 | Transmembrane protein 109 precursor (Mitsugumin-23) (Mg23) - Mus musculus (Mouse)                                                                                                             |
| Q9R1P0 | Proteasome subunit alpha type 4 (EC 3.4.25.1) (Proteasome component C9) (Macropain subunit C9) (Multicatalytic endopeptidase complex subunit C9) (Proteasome subunit L) - Mus musculus        |
| Q9CZY3 | Ubiquitin-conjugating enzyme E2 variant 1 (UEV-1) (CROC-1) - Mus musculus (Mouse)                                                                                                             |
| O08648 | Mitogen-activated protein kinase kinase kinase 4 (EC 2.7.11.25) (MAPK/ERK kinase kinase 4) (MEK kinase 4) (MEKK 4) - Mus musculus (Mouse)                                                     |
| P49025 | Citron Rho-interacting kinase (EC 2.7.11.1) (CRIK) (Rho-interacting, serine/threonine-protein kinase                                                                                          |
| Q60575 | Kinesin-like protein KIF1B - Mus musculus (Mouse)                                                                                                                                             |
| O08908 | Phosphatidylinositol 3-kinase regulatory subunit beta (PI3-kinase p85-subunit beta) (PtdIns-3-kinase p85-beta) - Mus musculus (Mouse)                                                         |
| Q9QUR6 | Prolyl endopeptidase (EC 3.4.21.26) (Post-proline cleaving enzyme) (PE) - Mus musculus (Mouse)                                                                                                |
| P80315 | T-complex protein 1 subunit delta (TCP-1-delta) (CCT-delta) (A45) - Mus musculus (Mouse)                                                                                                      |
| Q8VHS2 | Crumbs homolog 1 precursor - Mus musculus (Mouse)                                                                                                                                             |
| Q60848 | Lymphocyte-specific helicase (EC 3.6.1.-) (Proliferation associated SNF2-like protein) - Mus                                                                                                  |
| Q8BFY9 | Transportin-1 (Importin beta-2) (Karyopherin beta-2) - Mus musculus (Mouse)                                                                                                                   |
| P05784 | Keratin, type I cytoskeletal 18 (Cytokeratin-18) (CK-18) (Keratin-18) (K18) (Cytokeratin endo B)                                                                                              |
| P54227 | Stathmin (Phosphoprotein p19) (pp19) (Oncoprotein 18) (Op18) (Leukemia-associated phosphoprotein p18) (pp17) (Prosolin) (Metablastin) (Pr22 protein) (Leukemia-associated gene                |
| Q9EQC4 | Elongation of very long chain fatty acids protein 4 - Mus musculus (Mouse)                                                                                                                    |
| O35618 | Mdm4 protein (p53-binding protein Mdm4) (Mdm2-like p53-binding protein) (Mdmx protein) (Double minute 4 protein) - Mus musculus (Mouse)                                                       |
| P47754 | F-actin capping protein subunit alpha-2 (CapZ alpha-2) - Mus musculus (Mouse)                                                                                                                 |
| Q6PDM2 | Splicing factor, arginine/serine-rich 1 - Mus musculus (Mouse)                                                                                                                                |
| O08810 | 116 kDa U5 small nuclear ribonucleoprotein component (U5 snRNP-specific protein, 116 kDa) (U5-116 kDa) (Elongation factor Tu GTP-binding domain protein 2) - Mus musculus (Mouse)             |
| Q9JKF1 | Ras GTPase-activating-like protein IQGAP1 - Mus musculus (Mouse)                                                                                                                              |
| Q61771 | Kinesin-like protein KIF3B (Microtubule plus end-directed kinesin motor 3B) - Mus musculus (Mouse)                                                                                            |
| Q9R0K7 | Plasma membrane calcium-transporting ATPase 2 (EC 3.6.3.8) (PMCA2) (Plasma membrane calcium pump isoform 2) (Plasma membrane calcium ATPase isoform 2) - Mus musculus (Mouse)                 |
| P54103 | Zuotin-related factor 1 - Mus musculus (Mouse)                                                                                                                                                |
| P80313 | T-complex protein 1 subunit eta (TCP-1-eta) (CCT-eta) - Mus musculus (Mouse)                                                                                                                  |
| Q8C3X4 | GTP-binding protein GUF1 homolog - Mus musculus (Mouse)                                                                                                                                       |
| Q61171 | Peroxisome oxidoreductin-2 (EC 1.11.1.15) (Thioredoxin peroxidase 1) (Thioredoxin-dependent peroxide reductase 1) (Thiol-specific antioxidant protein) (TSA) - Mus musculus (Mouse)           |
| P49718 | DNA replication licensing factor MCM5 (CDC46 homolog) (P1-CDC46) - Mus musculus (Mouse)                                                                                                       |
| Q9WUM4 | Coronin-1C (Coronin-3) - Mus musculus (Mouse)                                                                                                                                                 |
| Q6GSS7 | Histone H2A type 2-A (H2A.2) (H2a-614) (H2a-615) - Mus musculus (Mouse)                                                                                                                       |
| Q61122 | NGFI-A-binding protein 1 (EGR-1-binding protein 1) - Mus musculus (Mouse)                                                                                                                     |

|        |                                                                                                                                                                                                    |
|--------|----------------------------------------------------------------------------------------------------------------------------------------------------------------------------------------------------|
| Q80XA6 | RalBP1-associated Eps domain-containing protein 2 (RalBP1-interacting protein 2) (Partner of                                                                                                       |
| P55821 | Stathmin-2 (SCG10 protein) (Superior cervical ganglion-10 protein) - Mus musculus (Mouse)                                                                                                          |
| P48754 | Breast cancer type 1 susceptibility protein homolog - Mus musculus (Mouse)                                                                                                                         |
| Q5SPW0 | Vacuolar protein sorting-associated protein 54 (Tumor antigen SLP-8p homolog) - Mus musculus                                                                                                       |
| Q3UEN2 | Protein FAM35A - Mus musculus (Mouse)                                                                                                                                                              |
| Q9JKP5 | Muscleblind-like protein (Triplet-expansion RNA-binding protein) - Mus musculus (Mouse)                                                                                                            |
| Q6A4J8 | Ubiquitin carboxyl-terminal hydrolase 7 (EC 3.1.2.15) (Ubiquitin thioesterase 7) (Ubiquitin-specific-processing protease 7) (Deubiquitinating enzyme 7) (Herpesvirus-associated ubiquitin-specific |
| Q9QWY8 | 130 kDa phosphatidylinositol 4,5-bisphosphate-dependent ARF1 GTPase-activating protein (PIP2-dependent ARF1 GAP) (ADP-ribosylation factor-directed GTPase-activating protein 1) (ARF GTPase        |
| Q9Z2K1 | Keratin, type I cytoskeletal 16 (Cytokeratin-16) (CK-16) (Keratin-16) (K16) - Mus musculus (Mouse)                                                                                                 |
| Q62418 | Drebrin-like protein (SH3 domain-containing protein 7) (Actin-binding protein 1) - Mus musculus                                                                                                    |
| P58660 | Caspase recruitment domain-containing protein 10 (Bcl10-interacting MAGUK protein 1) (Bimp1) -                                                                                                     |
| P97820 | Mitogen-activated protein kinase kinase kinase kinase 4 (EC 2.7.11.1) (MAPK/ERK kinase kinase kinase 4) (MEK kinase kinase 4) (MEKKK 4) (HPK/GCK-like kinase HGK) (Nck-interacting kinase) -       |
| P62270 | 40S ribosomal protein S18 (Ke-3) (Ke3) - Mus musculus (Mouse)                                                                                                                                      |
| P55200 | Zinc finger protein HRX (ALL-1) - Mus musculus (Mouse)                                                                                                                                             |
| P62908 | 40S ribosomal protein S3 - Mus musculus (Mouse)                                                                                                                                                    |
| Q9CQV8 | 14-3-3 protein beta/alpha (Protein kinase C inhibitor protein 1) (KCIP-1) - Mus musculus (Mouse)                                                                                                   |
| Q921M3 | Splicing factor 3B subunit 3 (Spliceosome-associated protein 130) (SAP 130) (SF3b130) (Pre-mRNA splicing factor SF3b 130 kDa subunit) - Mus musculus (Mouse)                                       |
| Q64311 | Protein N-terminal asparagine amidohydrolase (EC 3.5.1.-) (Protein NH2-terminal asparagine deamidase) (N-terminal Asn amidase) (NTN-amidase) (PNAD) (Protein NH2-terminal asparagine               |
| P40124 | Adenylyl cyclase-associated protein 1 (CAP 1) - Mus musculus (Mouse)                                                                                                                               |
| Q91X97 | Neurocalcin-delta - Mus musculus (Mouse)                                                                                                                                                           |
| Q9WUU9 | 80 kDa MCM3-associated protein (GANP protein) - Mus musculus (Mouse)                                                                                                                               |
| Q9WUF3 | CASP8-associated protein 2 (FLICE-associated huge protein) - Mus musculus (Mouse)                                                                                                                  |
| P41230 | Jumonji/ARID domain-containing protein 1C (Protein SmcX) (Protein Xe169) - Mus musculus                                                                                                            |
| Q64467 | Glyceraldehyde-3-phosphate dehydrogenase, testis-specific (EC 1.2.1.12) (Spermatogenic cell-specific glyceraldehyde 3-phosphate dehydrogenase 2) (GAPDH-2) - Mus musculus (Mouse)                  |
| P26618 | Alpha platelet-derived growth factor receptor precursor (EC 2.7.10.1) (PDGF-R-alpha) (CD140a                                                                                                       |
| Q61599 | Rho GDP-dissociation inhibitor 2 (Rho GDI 2) (Rho-GDI beta) (D4) - Mus musculus (Mouse)                                                                                                            |
| P19253 | 60S ribosomal protein L13a (Transplantation antigen P198) (Tum-P198 antigen) - Mus musculus                                                                                                        |
| Q60864 | Stress-induced-phosphoprotein 1 (STI1) (Hsc70/Hsp90-organizing protein) (Hop) (mSTI1) - Mus                                                                                                        |
| P62631 | Elongation factor 1-alpha 2 (EF-1-alpha-2) (Elongation factor 1 A-2) (eEF1A-2) (Statin S1) - Mus                                                                                                   |
| Q9ET77 | Junctophilin-3 (Junctophilin type 3) (JP-3) - Mus musculus (Mouse)                                                                                                                                 |
| Q91ZT5 | FYVE, RhoGEF and PH domain-containing protein 4 (Actin filament-binding protein frabin) (FGD1-related F-actin-binding protein) - Mus musculus (Mouse)                                              |
| Q62446 | FK506-binding protein 3 (EC 5.2.1.8) (Peptidyl-prolyl cis-trans isomerase) (PPIase) (Rotamase) (25 kDa FKBP) (FKBP-25) (Rapamycin-selective 25 kDa immunophilin) - Mus musculus (Mouse)            |
| Q93092 | Transaldolase (EC 2.2.1.2) - Mus musculus (Mouse)                                                                                                                                                  |
| O55234 | Proteasome subunit beta type 5 precursor (EC 3.4.25.1) (Proteasome epsilon chain) (Macropain epsilon chain) (Multicatalytic endopeptidase complex epsilon chain) (Proteasome subunit X)            |
| Q9R0Q7 | Prostaglandin E synthase 3 (EC 5.3.99.3) (Cytosolic prostaglandin E2 synthase) (cPGES) (Telomerase-binding protein p23) (Hsp90 co-chaperone) (Progesterone receptor complex p23) (Sid              |
| P27546 | Microtubule-associated protein 4 (MAP 4) - Mus musculus (Mouse)                                                                                                                                    |
| Q99KK9 | Probable histidyl-tRNA synthetase, mitochondrial precursor (EC 6.1.1.21) (Histidine--tRNA ligase) (HisRS) (Histidine--tRNA ligase-like) - Mus musculus (Mouse)                                     |
| P49717 | DNA replication licensing factor MCM4 (CDC21 homolog) (P1-CDC21) - Mus musculus (Mouse)                                                                                                            |
| Q8VC12 | Probable urocanate hydratase (EC 4.2.1.49) (Urocanase) (Imidazolonepropionate hydrolase) - Mus                                                                                                     |
| Q3THS6 | S-adenosylmethionine synthetase isoform type-2 (EC 2.5.1.6) (Methionine adenosyltransferase 2) (AdoMet synthetase 2) - Mus musculus (Mouse)                                                        |

|        |                                                                                                                                                                                                       |
|--------|-------------------------------------------------------------------------------------------------------------------------------------------------------------------------------------------------------|
| P19001 | Keratin, type I cytoskeletal 19 (Cytokeratin-19) (CK-19) (Keratin-19) (K19) - Mus musculus (Mouse)                                                                                                    |
| Q9D8N0 | Elongation factor 1-gamma (EF-1-gamma) (eEF-1B gamma) - Mus musculus (Mouse)                                                                                                                          |
| Q9QUI0 | Transforming protein RhoA precursor - Mus musculus (Mouse)                                                                                                                                            |
| P07901 | Heat shock protein HSP 90-alpha (HSP 86) (Tumor-specific transplantation 86 kDa antigen) (TSTA) -                                                                                                     |
| Q6P9Z1 | SWI/SNF-related matrix-associated actin-dependent regulator of chromatin subfamily D member 3 (60 kDa BRG-1/Brm-associated factor subunit C) (BRG1-associated factor 60C) (mBAF60c) - Mus             |
| P70298 | Homeobox protein cut-like 2 (Homeobox protein Cux-2) (Cut-like 2) - Mus musculus (Mouse)                                                                                                              |
| P38647 | Stress-70 protein, mitochondrial precursor (75 kDa glucose-regulated protein) (GRP 75) (Peptide-binding protein 74) (PBP74) (P66 MOT) (Mortalin) - Mus musculus (Mouse)                               |
| Q8BKC5 | Importin beta-3 (Karyopherin beta-3) (Ran-binding protein 5) (RanBP5) - Mus musculus (Mouse)                                                                                                          |
| P10126 | Elongation factor 1-alpha 1 (EF-1-alpha-1) (Elongation factor 1 A-1) (eEF1A-1) (Elongation factor                                                                                                     |
| P08113 | Endoplasmic precursor (Heat shock protein 90 kDa beta member 1) (94 kDa glucose-regulated protein) (GRP94) (ERP99) (Polymorphic tumor rejection antigen 1) (Tumor rejection antigen gp96) -           |
| Q3TY86 | Apoptosis-inducing factor-like protein (EC 1.-.-.-) - Mus musculus (Mouse)                                                                                                                            |
| Q9Z104 | SWI/SNF-related matrix-associated actin-dependent regulator of chromatin subfamily E member 1-related (SMARCE1-related protein) (HMG domain protein HMG20B) (Structural DNA-binding protein           |
| Q8CH62 | Oral cancer overexpressed protein 1 homolog - Mus musculus (Mouse)                                                                                                                                    |
| P11984 | T-complex protein 1 subunit alpha A (TCP-1-alpha) (CCT-alpha) (Tailless complex polypeptide 1A)                                                                                                       |
| P70398 | Probable ubiquitin carboxyl-terminal hydrolase FAF-X (EC 3.1.2.15) (Ubiquitin thioesterase FAF-X) (Ubiquitin-specific-processing protease FAF-X) (Deubiquitinating enzyme FAF-X) (Fat facets protein- |
| Q8BKX6 | Serine/threonine-protein kinase SMG1 (EC 2.7.11.1) (SMG-1) - Mus musculus (Mouse)                                                                                                                     |
| P16858 | Glyceraldehyde-3-phosphate dehydrogenase (EC 1.2.1.12) (GAPDH) - Mus musculus (Mouse)                                                                                                                 |
| Q9DBR7 | Protein phosphatase 1 regulatory subunit 12A (Myosin phosphatase-targeting subunit 1) (Myosin phosphatase target subunit 1) - Mus musculus (Mouse)                                                    |
| P62242 | 40S ribosomal protein S8 - Mus musculus (Mouse)                                                                                                                                                       |
| Q8VI56 | Low-density lipoprotein receptor-related protein 4 precursor (LDLR dan) - Mus musculus (Mouse)                                                                                                        |
| P16546 | Spectrin alpha chain, brain (Spectrin, non-erythroid alpha chain) (Alpha-II spectrin) (Fodrin alpha                                                                                                   |
| Q76MZ3 | Serine/threonine-protein phosphatase 2A 65 kDa regulatory subunit A alpha isoform (PP2A, subunit A, PR65-alpha isoform) (PP2A, subunit A, R1-alpha isoform) - Mus musculus (Mouse)                    |
| Q61820 | GTP-binding nuclear protein Ran, testis-specific isoform - Mus musculus (Mouse)                                                                                                                       |
| Q62504 | Mx2-interacting protein (SPEN homolog) (SMART/HDAC1-associated repressor protein) - Mus                                                                                                               |
| Q920R0 | Alsin (Amyotrophic lateral sclerosis protein 2 homolog) - Mus musculus (Mouse)                                                                                                                        |
| Q6P4S8 | Integrator complex subunit 1 (Int1) - Mus musculus (Mouse)                                                                                                                                            |
| O35973 | Period circadian protein homolog 1 (Circadian clock protein PERIOD 1) (Circadian pacemaker protein Rigi) (mPER1) - Mus musculus (Mouse)                                                               |
| P62281 | 40S ribosomal protein S11 - Mus musculus (Mouse)                                                                                                                                                      |
| Q8CGM2 | Retinitis pigmentosa 1-like 1 protein (Retinitis pigmentosa 1-like protein 1) - Mus musculus (Mouse)                                                                                                  |
| P26039 | Talin-1 - Mus musculus (Mouse)                                                                                                                                                                        |
| Q8R0W0 | Epiplakin - Mus musculus (Mouse)                                                                                                                                                                      |
| Q9JM05 | E3 SUMO-protein ligase PIAS4 (Protein inhibitor of activated STAT protein 4) (Protein inhibitor of activated STAT protein gamma) (PIAS-gamma) (PIASy) - Mus musculus (Mouse)                          |
| Q9CQG9 | Transmembrane protein 100 - Mus musculus (Mouse)                                                                                                                                                      |
| P09586 | Chorionic somatomammotropin hormone 2 precursor (Placental lactogen II) (PL-II) - Mus musculus                                                                                                        |
| P26350 | Prothymosin alpha [Contains: Thymosin alpha] - Mus musculus (Mouse)                                                                                                                                   |
| O54750 | Cytochrome P450 2J6 (EC 1.14.14.1) (CYP11J6) (Arachidonic acid epoxygenase) - Mus musculus                                                                                                            |
| P62141 | Serine/threonine-protein phosphatase PP1-beta catalytic subunit (EC 3.1.3.16) (PP-1B) - Mus                                                                                                           |
| P12367 | cAMP-dependent protein kinase type II-alpha regulatory subunit - Mus musculus (Mouse)                                                                                                                 |
| Q3TXZ1 | Zinc finger protein 575 - Mus musculus (Mouse)                                                                                                                                                        |
| Q60865 | GPI-anchored membrane protein 1 (GPI-anchored protein p137) (p137GPI) - Mus musculus (Mouse)                                                                                                          |
| Q8VCZ3 | THAP domain-containing protein 7 - Mus musculus (Mouse)                                                                                                                                               |
| O88693 | Ceramide glucosyltransferase (EC 2.4.1.80) (Glucosylceramide synthase) (GCS) (UDP-glucose:N-acylsphingosine D-glucosyltransferase) (UDP-glucose ceramide glucosyltransferase) (GLCT-1) -              |

|        |                                                                                                                                                                                               |
|--------|-----------------------------------------------------------------------------------------------------------------------------------------------------------------------------------------------|
| Q9R1P1 | Proteasome subunit beta type 3 (EC 3.4.25.1) (Proteasome theta chain) (Proteasome chain 13) (Proteasome component C10-II) - Mus musculus (Mouse)                                              |
| Q8VC28 | Aldo-keto reductase family 1 member C13 (EC 1.1.1.-) - Mus musculus (Mouse)                                                                                                                   |
| Q8C0N1 | Kinesin-like protein KIF2B - Mus musculus (Mouse)                                                                                                                                             |
| P30416 | FK506-binding protein 4 (EC 5.2.1.8) (Peptidyl-prolyl cis-trans isomerase) (PPIase) (Rotamase) (p59 protein) (HSP-binding immunophilin) (HBI) (FKBP52 protein) (52 kDa FK506-binding protein) |
| Q7TNP2 | Serine/threonine-protein phosphatase 2A 65 kDa regulatory subunit A beta isoform (PP2A, subunit A, PR65-beta isoform) (PP2A, subunit A, R1-beta isoform) - Mus musculus (Mouse)               |
| Q9R190 | Metastasis-associated protein MTA2 (Metastasis-associated 1-like 1) - Mus musculus (Mouse)                                                                                                    |
| Q6P5F9 | Exportin-1 (Exp1) (Chromosome region maintenance 1 protein homolog) - Mus musculus (Mouse)                                                                                                    |
| Q9DAI4 | Zinc finger and BTB domain-containing protein 43 (Zinc finger protein 297B) - Mus musculus                                                                                                    |
| Q9D289 | Trafficking protein particle complex subunit 6B - Mus musculus (Mouse)                                                                                                                        |
| Q99LX0 | Protein DJ-1 - Mus musculus (Mouse)                                                                                                                                                           |
| O54951 | Semaphorin-6B precursor (Semaphorin VIB) (Sema VIB) (Semaphorin N) (Sema N) - Mus musculus                                                                                                    |
| Q61781 | Keratin, type I cytoskeletal 14 (Cytokeratin-14) (CK-14) (Keratin-14) (K14) - Mus musculus (Mouse)                                                                                            |
| Q9CQ60 | 6-phosphogluconolactonase (EC 3.1.1.31) (6PGL) - Mus musculus (Mouse)                                                                                                                         |
| Q9WV80 | Sorting nexin-1 - Mus musculus (Mouse)                                                                                                                                                        |
| O09061 | Proteasome subunit beta type 1 precursor (EC 3.4.25.1) (Proteasome component C5) (Macropain subunit C5) (Multicatalytic endopeptidase complex subunit C5) (Proteasome gamma chain) - Mus      |
| Q9DB77 | Ubiquinol-cytochrome-c reductase complex core protein 2, mitochondrial precursor (EC 1.10.2.2) (Core protein II) (Complex III subunit II) - Mus musculus (Mouse)                              |
| Q80YV4 | Pantothenate kinase 4 (EC 2.7.1.33) (Pantothenic acid kinase 4) (mPanK4) - Mus musculus (Mouse)                                                                                               |
| Q61092 | Laminin subunit gamma-2 precursor (Laminin 5 gamma 2 subunit) (Kalinin/nicein/epiligrin 100 kDa subunit) (Laminin B2t chain) - Mus musculus (Mouse)                                           |
| Q9JIF7 | Coatomer subunit beta (Beta-coat protein) (Beta-COP) - Mus musculus (Mouse)                                                                                                                   |
| Q01098 | Glutamate [NMDA] receptor subunit epsilon 3 precursor (N-methyl D-aspartate receptor subtype 2C) (NR2C) (NMDAR2C) - Mus musculus (Mouse)                                                      |
| P25206 | DNA replication licensing factor MCM3 (DNA polymerase alpha holoenzyme-associated protein P1) (P1-MCM3) - Mus musculus (Mouse)                                                                |
| O08788 | Dynactin-1 (150 kDa dynein-associated polypeptide) (DP-150) (DAP-150) (p150-glued) - Mus                                                                                                      |
| Q8BSS9 | Liprin-alpha-2 (Protein tyrosine phosphatase receptor type f polypeptide-interacting protein alpha-2) (PTPRF-interacting protein alpha-2) - Mus musculus (Mouse)                              |
| Q8R4K2 | Interleukin-1 receptor-associated kinase 4 (EC 2.7.11.1) (IRAK-4) - Mus musculus (Mouse)                                                                                                      |
| Q80UK8 | Integrator complex subunit 2 (Int2) - Mus musculus (Mouse)                                                                                                                                    |
| P30681 | High mobility group protein B2 (High mobility group protein 2) (HMG-2) - Mus musculus (Mouse)                                                                                                 |
| Q6P8J7 | Creatine kinase, sarcomeric mitochondrial precursor (EC 2.7.3.2) (S-MtCK) - Mus musculus (Mouse)                                                                                              |
| Q62261 | Spectrin beta chain, brain 1 (Spectrin, non-erythroid beta chain 1) (Beta-II spectrin) (Fodrin beta                                                                                           |
| Q8K4E0 | Alstrom syndrome protein 1 homolog - Mus musculus (Mouse)                                                                                                                                     |
| Q9QYX7 | Protein piccolo (Aczonin) (Multidomain presynaptic cytomatrix protein) (Brain-derived HLMN protein)                                                                                           |
| P68254 | 14-3-3 protein theta (14-3-3 protein tau) - Mus musculus (Mouse)                                                                                                                              |
| P11499 | Heat shock protein HSP 90-beta (HSP 84) (Tumor-specific transplantation 84 kDa antigen) (TSTA) -                                                                                              |
| P58252 | Elongation factor 2 (EF-2) - Mus musculus (Mouse)                                                                                                                                             |
| Q91YE5 | Bromodomain adjacent to zinc finger domain protein 2A (Transcription termination factor I-interacting protein 5) (TTF-I-interacting protein 5) (Tip5) - Mus musculus (Mouse)                  |
| P45591 | Cofilin-2 (Cofilin, muscle isoform) - Mus musculus (Mouse)                                                                                                                                    |
| P23116 | Eukaryotic translation initiation factor 3 subunit 10 (eIF-3 theta) (eIF3 p167) (eIF3 p180) (eIF3 p185) (eIF3a) (p162 protein) (Centrosomin) - Mus musculus (Mouse)                           |
| O08638 | Myosin-11 (Myosin heavy chain 11) (Myosin heavy chain, smooth muscle isoform) (SMMHC) - Mus                                                                                                   |
| Q9QXL1 | Kinesin family member 21B (Kinesin-like protein KIF6) - Mus musculus (Mouse)                                                                                                                  |
| Q8R4B8 | Cold autoinflammatory syndrome 1 protein homolog (PYRIN-containing APAF1-like protein 1) (Mast cell maturation-associated-inducible protein 1) (Cryopyrin) - Mus musculus (Mouse)             |
| P16406 | Glutamyl aminopeptidase (EC 3.4.11.7) (EAP) (Aminopeptidase A) (APA) (BP-1/6C3 antigen) - Mus                                                                                                 |

|        |                                                                                                                                                                                              |
|--------|----------------------------------------------------------------------------------------------------------------------------------------------------------------------------------------------|
| Q8BGQ7 | Alanyl-tRNA synthetase, cytoplasmic (EC 6.1.1.7) (Alanine--tRNA ligase) (AlaRS) - Mus musculus                                                                                               |
| Q91V92 | ATP-citrate synthase (EC 2.3.3.8) (ATP-citrate (pro-S)-lyase) (Citrate cleavage enzyme) - Mus                                                                                                |
| Q8R1B4 | Eukaryotic translation initiation factor 3 subunit 8 (eIF3 p110) (eIF3c) - Mus musculus (Mouse)                                                                                              |
| P07724 | Serum albumin precursor - Mus musculus (Mouse)                                                                                                                                               |
| Q61768 | Kinesin heavy chain (Ubiquitous kinesin heavy chain) (UKHC) - Mus musculus (Mouse)                                                                                                           |
| Q6ZPK0 | PHD finger protein 21A (BRAF35-HDAC complex protein BHC80) (mBHC80) (BHC80a) - Mus                                                                                                           |
| P62827 | GTP-binding nuclear protein Ran (GTPase Ran) (Ras-like protein TC4) - Mus musculus (Mouse)                                                                                                   |
| P54869 | Hydroxymethylglutaryl-CoA synthase, mitochondrial precursor (EC 2.3.3.10) (HMG-CoA synthase) (3-hydroxy-3-methylglutaryl coenzyme A synthase) - Mus musculus (Mouse)                         |
| P03966 | N-myc proto-oncogene protein - Mus musculus (Mouse)                                                                                                                                          |
| P97412 | Lysosomal-trafficking regulator (Beige protein) (CHS1 homolog) - Mus musculus (Mouse)                                                                                                        |
| P30275 | Creatine kinase, ubiquitous mitochondrial precursor (EC 2.7.3.2) (U-MtCK) (Mia-CK) (Acidic-type mitochondrial creatine kinase) - Mus musculus (Mouse)                                        |
| Q04447 | Creatine kinase B-type (EC 2.7.3.2) (Creatine kinase B chain) (B-CK) - Mus musculus (Mouse)                                                                                                  |
| Q8BTI8 | Serine/arginine repetitive matrix protein 2 - Mus musculus (Mouse)                                                                                                                           |
| Q9CPR4 | 60S ribosomal protein L17 (L23) - Mus musculus (Mouse)                                                                                                                                       |
| Q99PF4 | Cadherin-23 precursor (Otocadherin) - Mus musculus (Mouse)                                                                                                                                   |
| Q8CGC6 | RNA-binding protein 28 (RNA-binding motif protein 28) - Mus musculus (Mouse)                                                                                                                 |
| Q9D6Z1 | Nucleolar protein Nop56 (Nucleolar protein 5A) - Mus musculus (Mouse)                                                                                                                        |
| Q6TXD4 | Dynamamin-binding protein (Scaffold protein Tuba) - Mus musculus (Mouse)                                                                                                                     |
| P08730 | Keratin, type I cytoskeletal 13 (Cytokeratin-13) (CK-13) (Keratin-13) (K13) (47 kDa cytokeratin) - Mus                                                                                       |
| Q8R5G7 | Centaurin-delta 3 (Cnt-d3) (Arf-GAP, Rho-GAP, ankyrin repeat and pleckstrin homology domain-containing protein 3) (Dual specificity Rho- and Arf-GTPase-activating protein 1) - Mus musculus |
| Q7TMY8 | HECT, UBA and WWE domain-containing protein 1 (EC 6.3.2.-) (E3 ubiquitin protein ligase URE-B1) (E3Histone) - Mus musculus (Mouse)                                                           |
| Q35206 | Collagen alpha-1(XV) chain precursor [Contains: Endostatin (Endostatin-XV)] - Mus musculus                                                                                                   |
| P35969 | Vascular endothelial growth factor receptor 1 precursor (EC 2.7.10.1) (VEGFR-1) (Tyrosine-protein kinase receptor FLT) (FLT-1) (Embryonic receptor kinase 2) - Mus musculus (Mouse)          |
| Q01853 | Transitional endoplasmic reticulum ATPase (TER ATPase) (15S Mg(2+)-ATPase p97 subunit) (Valosin-containing protein) (VCP) - Mus musculus (Mouse)                                             |
| Q9WTR0 | Matrix metalloproteinase-16 precursor (EC 3.4.24.-) (MMP-16) (Membrane-type matrix metalloproteinase 3) (MT-MMP 3) (MTMMP3) (Membrane-type-3 matrix metalloproteinase) (MT3-                 |
| Q8R4U7 | Leucine zipper protein 1 (Leucine zipper motif-containing protein) - Mus musculus (Mouse)                                                                                                    |
| P03995 | Glial fibrillary acidic protein, astrocyte (GFAP) - Mus musculus (Mouse)                                                                                                                     |
| Q8CGC7 | Bifunctional aminoacyl-tRNA synthetase [Includes: Glutamyl-tRNA synthetase (EC 6.1.1.17) (Glutamate--tRNA ligase); Prolyl-tRNA synthetase (EC 6.1.1.15) (Proline--tRNA ligase)] - Mus        |
| Q8VDD5 | Myosin-9 (Myosin heavy chain 9) (Myosin heavy chain, nonmuscle IIa) (Nonmuscle myosin heavy chain IIa) (NMMHC II-a) (NMMHC-IIA) (Cellular myosin heavy chain, type A) (Nonmuscle myosin      |
| P07310 | Creatine kinase M-type (EC 2.7.3.2) (Creatine kinase M chain) (M-CK) - Mus musculus (Mouse)                                                                                                  |
| Q9QZH3 | Peptidyl-prolyl cis-trans isomerase E (EC 5.2.1.8) (PPIase E) (Rotamase E) (Cyclophilin E)                                                                                                   |
| Q91VX2 | Ubiquitin-associated protein 2 (Protein lingerer homolog 1) (MLig-1) - Mus musculus (Mouse)                                                                                                  |
| P43406 | Integrin alpha-V precursor (Vitronectin receptor subunit alpha) (CD51 antigen) [Contains: Integrin alpha-V heavy chain; Integrin alpha-V light chain] - Mus musculus (Mouse)                 |
| P02535 | Keratin, type I cytoskeletal 10 (Cytokeratin-10) (CK-10) (Keratin-10) (K10) (56 kDa cytokeratin) (Keratin, type I cytoskeletal 59 kDa) - Mus musculus (Mouse)                                |
| Q922G7 | Tektin-2 (Testicular tektin) (Tektin-t) - Mus musculus (Mouse)                                                                                                                               |
| Q925Q8 | Dachshund homolog 2 (Dach2) - Mus musculus (Mouse)                                                                                                                                           |
| Q9JIL4 | PDZ domain-containing protein 1 (CFTR-associated protein of 70 kDa) (Na/Pi cotransporter C-terminal-associated protein) (NaPi-Cap1) (Na(+)/H(+) exchanger regulatory factor 3) (Sodium-      |
| Q9QXA7 | Tripartite motif-containing protein 44 (Protein DIPB) (Protein Mc7) - Mus musculus (Mouse)                                                                                                   |
| P43277 | Histone H1.3 (H1 VAR.4) (H1d) - Mus musculus (Mouse)                                                                                                                                         |
| P26041 | Moesin (Membrane-organizing extension spike protein) - Mus musculus (Mouse)                                                                                                                  |

|        |                                                                                                                                                                                                      |
|--------|------------------------------------------------------------------------------------------------------------------------------------------------------------------------------------------------------|
| Q68FD5 | Clathrin heavy chain - Mus musculus (Mouse)                                                                                                                                                          |
| Q99104 | Myosin-Va (Dilute myosin heavy chain, non-muscle) - Mus musculus (Mouse)                                                                                                                             |
| Q9DBJ1 | Phosphoglycerate mutase 1 (EC 5.4.2.1) (EC 5.4.2.4) (EC 3.1.3.13) (Phosphoglycerate mutase isozyme B) (PGAM-B) (BPG-dependent PGAM 1) - Mus musculus (Mouse)                                         |
| Q8BG95 | Protein phosphatase 1 regulatory subunit 12B (Myosin phosphatase-targeting subunit 2) - Mus                                                                                                          |
| P33173 | Kinesin-like protein KIF1A (Axonal transporter of synaptic vesicles) - Mus musculus (Mouse)                                                                                                          |
| Q61147 | Ceruloplasmin precursor (EC 1.16.3.1) (Ferroxidase) - Mus musculus (Mouse)                                                                                                                           |
| Q99PG2 | Opioid growth factor receptor (OGFr) (Zeta-type opioid receptor) - Mus musculus (Mouse)                                                                                                              |
| P70195 | Proteasome subunit beta type 7 precursor (EC 3.4.25.1) (Proteasome subunit Z) (Macropain chain Z) (Multicatalytic endopeptidase complex chain Z) - Mus musculus (Mouse)                              |
| Q9R0P5 | Destrin (Actin-depolymerizing factor) (ADF) (Sid 23) - Mus musculus (Mouse)                                                                                                                          |
| Q02053 | Ubiquitin-activating enzyme E1 X (Ubiquitin-activating enzyme E1) - Mus musculus (Mouse)                                                                                                             |
| Q8CJ27 | Abnormal spindle-like microcephaly-associated protein homolog (Calmodulin-binding protein 1) (Spindle and hydroxyurea checkpoint abnormal protein) (Calmodulin-binding protein Sha1) - Mus           |
| Q8VHE6 | Ciliary dynein heavy chain 5 (Axonemal beta dynein heavy chain 5) (Mdnah5) - Mus musculus                                                                                                            |
| Q924C1 | Exportin-5 (Exp5) (Ran-binding protein 21) - Mus musculus (Mouse)                                                                                                                                    |
| Q11011 | Puromycin-sensitive aminopeptidase (EC 3.4.11.-) (PSA) - Mus musculus (Mouse)                                                                                                                        |
| P21550 | Beta-enolase (EC 4.2.1.11) (2-phospho-D-glycerate hydro-lyase) (Muscle-specific enolase) (MSE) (Skeletal muscle enolase) (Enolase 3) - Mus musculus (Mouse)                                          |
| Q9Z1Q9 | Valyl-tRNA synthetase (EC 6.1.1.9) (Valine--tRNA ligase) (ValRS) (Protein G7a) - Mus musculus                                                                                                        |
| Q9JKK8 | Serine/threonine-protein kinase ATR (EC 2.7.11.1) (Ataxia telangiectasia and Rad3-related protein) -                                                                                                 |
| Q9CYF5 | Williams-Beuren syndrome chromosome region 16 protein homolog - Mus musculus (Mouse)                                                                                                                 |
| Q921E2 | Ras-related protein Rab-31 - Mus musculus (Mouse)                                                                                                                                                    |
| Q9D868 | Peptidyl-prolyl cis-trans isomerase H (EC 5.2.1.8) (PPIase H) (Rotamase H) - Mus musculus                                                                                                            |
| O54749 | Cytochrome P450 2J5 (EC 1.14.14.1) (CYP11J5) (Arachidonic acid epoxygenase) - Mus musculus                                                                                                           |
| Q63994 | Myeloid cell surface antigen CD33 precursor (Sialic acid-binding Ig-like lectin 3) (Siglec-3) - Mus                                                                                                  |
| P67984 | 60S ribosomal protein L22 (Heparin-binding protein HBp15) - Mus musculus (Mouse)                                                                                                                     |
| O88866 | Hormonally up-regulated neu tumor-associated kinase (EC 2.7.11.1) (Serine/threonine-protein                                                                                                          |
| P35979 | 60S ribosomal protein L12 - Mus musculus (Mouse)                                                                                                                                                     |
| Q9R194 | Cryptochrome-2 - Mus musculus (Mouse)                                                                                                                                                                |
| P97784 | Cryptochrome-1 - Mus musculus (Mouse)                                                                                                                                                                |
| Q9CZM2 | 60S ribosomal protein L15 - Mus musculus (Mouse)                                                                                                                                                     |
| P11881 | Inositol 1,4,5-trisphosphate receptor type 1 (Type 1 inositol 1,4,5-trisphosphate receptor) (Type 1 InsP3 receptor) (IP3 receptor isoform 1) (InsP3R1) (Inositol 1,4,5-trisphosphate-binding protein |
| Q6ZWN5 | 40S ribosomal protein S9 - Mus musculus (Mouse)                                                                                                                                                      |
| Q91VW5 | Golgin subfamily A member 4 (tGolgin-1) - Mus musculus (Mouse)                                                                                                                                       |
| Q9JM52 | Misshapen-like kinase 1 (EC 2.7.11.1) (Mitogen-activated protein kinase kinase kinase 6) (MAPK/ERK kinase kinase kinase 6) (MEK kinase kinase 6) (MEKKK 6) (Misshapen/NIK-related                    |
| Q9CQN1 | Heat shock protein 75 kDa, mitochondrial precursor (HSP 75) (Tumor necrosis factor type 1 receptor-associated protein) (TRAP-1) (TNFR-associated protein 1) - Mus musculus (Mouse)                   |
| Q9R0L6 | Pericentriolar material 1 protein (PCM-1) (mPCM-1) - Mus musculus (Mouse)                                                                                                                            |
| P14131 | 40S ribosomal protein S16 - Mus musculus (Mouse)                                                                                                                                                     |
| Q80TB8 | Probable oxidoreductase KIAA1576 (EC 1.-.-.-) - Mus musculus (Mouse)                                                                                                                                 |
| P20029 | 78 kDa glucose-regulated protein precursor (GRP 78) (Heat shock 70 kDa protein 5) (Immunoglobulin heavy chain-binding protein) (BiP) - Mus musculus (Mouse)                                          |
| Q99PT1 | Rho GDP-dissociation inhibitor 1 (Rho GDI 1) (Rho-GDI alpha) (GDI-1) - Mus musculus (Mouse)                                                                                                          |
| Q9ES17 | Interleukin-21 precursor (IL-21) - Mus musculus (Mouse)                                                                                                                                              |
| Q8BHE0 | Proline-rich protein 11 - Mus musculus (Mouse)                                                                                                                                                       |
| Q99PP7 | Transcription intermediary factor 1-gamma (TIF1-gamma) (Tripartite motif-containing protein 33) -                                                                                                    |
| Q8R4U0 | Stabilin-2 precursor [Contains: Short form stabilin-2] - Mus musculus (Mouse)                                                                                                                        |
| P46664 | Adenylosuccinate synthetase isozyme 2 (EC 6.3.4.4) (Adenylosuccinate synthetase, non-muscle isozyme) (Adenylosuccinate synthetase, acidic isozyme) (IMP--aspartate ligase 2) (AdSS 2)                |



|        |                                                                                                                                                                                                             |
|--------|-------------------------------------------------------------------------------------------------------------------------------------------------------------------------------------------------------------|
| P11983 | T-complex protein 1 subunit alpha B (TCP-1-alpha) (CCT-alpha) (Tailless complex polypeptide 1B)                                                                                                             |
| Q05816 | Fatty acid-binding protein, epidermal (E-FABP) (Psoriasis-associated fatty acid-binding protein homolog) (PA-FABP) (Keratinocyte lipid-binding protein) - Mus musculus (Mouse)                              |
| Q64514 | Tripeptidyl-peptidase 2 (EC 3.4.14.10) (Tripeptidyl-peptidase II) (TPP-II) (Tripeptidyl                                                                                                                     |
| P20357 | Microtubule-associated protein 2 (MAP 2) - Mus musculus (Mouse)                                                                                                                                             |
| P11531 | Dystrophin - Mus musculus (Mouse)                                                                                                                                                                           |
| P09405 | Nucleolin (Protein C23) - Mus musculus (Mouse)                                                                                                                                                              |
| Q91XQ0 | Ciliary dynein heavy chain 8 (Axonemal beta dynein heavy chain 8) - Mus musculus (Mouse)                                                                                                                    |
| Q6URW6 | Myosin-14 (Myosin heavy chain 14) (Myosin heavy chain, nonmuscle IIc) (Nonmuscle myosin heavy chain IIc) (NMHC II-C) - Mus musculus (Mouse)                                                                 |
| P19096 | Fatty acid synthase (EC 2.3.1.85) [Includes: [Acyl-carrier-protein] S-acetyltransferase (EC 2.3.1.38); [Acyl-carrier-protein] S-malonyltransferase (EC 2.3.1.39); 3-oxoacyl-[acyl-carrier-protein] synthase |
| Q8R429 | Sarcoplasmic/endoplasmic reticulum calcium ATPase 1 (EC 3.6.3.8) (Calcium pump 1) (SERCA1) (SR Ca(2+)-ATPase 1) (Calcium-transporting ATPase sarcoplasmic reticulum type, fast twitch                       |
| P80316 | T-complex protein 1 subunit epsilon (TCP-1-epsilon) (CCT-epsilon) - Mus musculus (Mouse)                                                                                                                    |
| O55103 | Periaxin - Mus musculus (Mouse)                                                                                                                                                                             |
| P62259 | 14-3-3 protein epsilon (14-3-3E) - Mus musculus (Mouse)                                                                                                                                                     |
| Q6DFV7 | Nuclear receptor coactivator 7 - Mus musculus (Mouse)                                                                                                                                                       |
| P14206 | 40S ribosomal protein SA (p40) (34/67 kDa laminin receptor) - Mus musculus (Mouse)                                                                                                                          |
| P42227 | Signal transducer and activator of transcription 3 (Acute-phase response factor) - Mus musculus                                                                                                             |
| Q6ZQ38 | Cullin-associated NEDD8-dissociated protein 1 (Cullin-associated and neddylation-dissociated protein 1) (p120 CAND1) - Mus musculus (Mouse)                                                                 |
| Q9D4Q1 | RIB43A-like with coiled-coils protein 2 - Mus musculus (Mouse)                                                                                                                                              |
| Q569Z5 | Probable ATP-dependent RNA helicase DDX46 (EC 3.6.1.-) (DEAD box protein 46) - Mus musculus                                                                                                                 |
| Q80ZW0 | Serine/threonine-protein kinase 35 (EC 2.7.11.1) - Mus musculus (Mouse)                                                                                                                                     |
| Q64512 | Tyrosine-protein phosphatase non-receptor type 13 (EC 3.1.3.48) (Protein tyrosine phosphatase PTP-BL) (Protein-tyrosine phosphatase RIP) (protein tyrosine phosphatase DPZPTP) (PTP36) - Mus                |
| Q62407 | Striated muscle-specific serine/threonine protein kinase (EC 2.7.11.1) (Aortic preferentially expressed protein 1) (APEG-1) - Mus musculus (Mouse)                                                          |
| Q921J2 | GTP-binding protein Rheb (Ras homolog enriched in brain) - Mus musculus (Mouse)                                                                                                                             |
| P17182 | Alpha-enolase (EC 4.2.1.11) (2-phospho-D-glycerate hydro-lyase) (Non-neural enolase) (NNE)                                                                                                                  |
| Q924C6 | Lysyl oxidase homolog 4 precursor (EC 1.4.3.-) (Lysyl oxidase-like protein 4) (Lysyl oxidase-related protein C) - Mus musculus (Mouse)                                                                      |
| Q9Z1M8 | Protein Red (Protein RER) (IK factor) (Cytokine IK) - Mus musculus (Mouse)                                                                                                                                  |
| Q5XJY5 | Coatomer subunit delta (Delta-coat protein) (Delta-COP) (Archain) - Mus musculus (Mouse)                                                                                                                    |
| Q09PK2 | Retroviral-like aspartic protease 1 precursor (EC 3.4.23.-) (Skin-specific retroviral-like aspartic protease) (Skin aspartic protease) (SASPase) (TPA-inducible aspartic proteinase-like protein) - Mus     |
| P12970 | 60S ribosomal protein L7a (Surfeit locus protein 3) - Mus musculus (Mouse)                                                                                                                                  |
| P54923 | [Protein ADP-ribosylarginine] hydrolase (EC 3.2.2.19) (ADP-ribosylarginine hydrolase) (ADP-ribose-L-arginine cleaving enzyme) - Mus musculus (Mouse)                                                        |
| P62852 | 40S ribosomal protein S25 - Mus musculus (Mouse)                                                                                                                                                            |
| P00342 | L-lactate dehydrogenase C chain (EC 1.1.1.27) (LDH-C) (LDH testis subunit) (LDH-X) - Mus                                                                                                                    |
| Q9Z2U0 | Proteasome subunit alpha type 7 (EC 3.4.25.1) (Proteasome subunit RC6-1) - Mus musculus                                                                                                                     |
| Q8VI47 | Canalicular multispecific organic anion transporter 1 (ATP-binding cassette sub-family C member 2) -                                                                                                        |
| Q99MD9 | Nuclear autoantigenic sperm protein (NASP) - Mus musculus (Mouse)                                                                                                                                           |
| Q91ZU6 | Bullous pemphigoid antigen 1, isoforms 1/2/3/4 (BPA) (Hemidesmosomal plaque protein) (Dystonia musculorum protein) (Dystonin) - Mus musculus (Mouse)                                                        |
| Q80T14 | Extracellular matrix protein FRAS1 precursor - Mus musculus (Mouse)                                                                                                                                         |
| Q8BP67 | 60S ribosomal protein L24 - Mus musculus (Mouse)                                                                                                                                                            |
| Q80UN9 | tRNA isopentenyltransferase, mitochondrial precursor (EC 2.5.1.8) (Isopentenyl-diphosphate:tRNA isopentenyltransferase) (IPP transferase) (IPTase) (IPPT) - Mus musculus (Mouse)                            |

|        |                                                                                                                                                                                                                                                   |
|--------|---------------------------------------------------------------------------------------------------------------------------------------------------------------------------------------------------------------------------------------------------|
| Q8C196 | Carbamoyl-phosphate synthase [ammonia], mitochondrial precursor (EC 6.3.4.16) (Carbamoyl-phosphate synthetase I) (CPSase I) - Mus musculus (Mouse)                                                                                                |
| Q80Z16 | E3 ubiquitin-protein ligase LRSAM1 (EC 6.3.2.-) (Leucine-rich repeat and sterile alpha motif-containing protein 1) (Tsg101-associated ligase) - Mus musculus (Mouse)                                                                              |
| P62754 | 40S ribosomal protein S6 (Phosphoprotein NP33) - Mus musculus (Mouse)                                                                                                                                                                             |
| Q8CIQ7 | Dedicator of cytokinesis protein 3 (Modifier of cell adhesion) (Presenilin-binding protein) (PBP) - Mus                                                                                                                                           |
| Q9QWL7 | Keratin, type I cytoskeletal 17 (Cytokeratin-17) (CK-17) (Keratin-17) (K17) - Mus musculus (Mouse)                                                                                                                                                |
| P63325 | 40S ribosomal protein S10 - Mus musculus (Mouse)                                                                                                                                                                                                  |
| Q9JHU4 | Dynein heavy chain, cytosolic (DYHC) (Cytoplasmic dynein heavy chain 1) (DHC1) (Dynein heavy chain 1, cytoplasmic 1) - Mus musculus (Mouse)                                                                                                       |
| Q6A078 | Centrosomal protein Cep290 (Nephrocystin-6) - Mus musculus (Mouse)                                                                                                                                                                                |
| Q8VHK5 | Membrane protein MLC1 - Mus musculus (Mouse)                                                                                                                                                                                                      |
| Q80W68 | Kin of IRRE-like protein 1 precursor (Kin of irregular chiasm-like protein 1) (Nephrin-like protein 1) -                                                                                                                                          |
| P31254 | Ubiquitin-activating enzyme E1 Y (Ubiquitin-activating enzyme E1) - Mus musculus (Mouse)                                                                                                                                                          |
| P06151 | L-lactate dehydrogenase A chain (EC 1.1.1.27) (LDH-A) (LDH muscle subunit) (LDH-M) - Mus                                                                                                                                                          |
| Q9CZW4 | Long-chain-fatty-acid--CoA ligase 3 (EC 6.2.1.3) (Long-chain acyl-CoA synthetase 3) (LACS 3) -                                                                                                                                                    |
| P05063 | Fructose-bisphosphate aldolase C (EC 4.1.2.13) (Brain-type aldolase) (Aldolase 3) (Zebrin II) (Scrapie-responsive protein 2) - Mus musculus (Mouse)                                                                                               |
| P62748 | Hippocalcin-like protein 1 (Visinin-like protein 3) (VILIP-3) (Neural visinin-like protein 3) (NVL-3)                                                                                                                                             |
| Q7TMK6 | Hook homolog 2 - Mus musculus (Mouse)                                                                                                                                                                                                             |
| Q8CGK3 | Lon protease homolog, mitochondrial precursor (EC 3.4.21.-) (Lon protease-like protein) (LONP) (Mitochondrial ATP-dependent protease Lon) (Serine protease 15) - Mus musculus (Mouse)                                                             |
| P62702 | 40S ribosomal protein S4, X isoform - Mus musculus (Mouse)                                                                                                                                                                                        |
| Q8BHS8 | Syntabulin (Syntaxin-1-binding protein) (Golgi-localized syntaphilin-related protein) (m-Golsyn) - Mus                                                                                                                                            |
| Q8JZQ2 | AFG3-like protein 2 (EC 3.4.24.-) - Mus musculus (Mouse)                                                                                                                                                                                          |
| P47856 | Glucosamine--fructose-6-phosphate aminotransferase [isomerizing] 1 (EC 2.6.1.16) (Hexosephosphate aminotransferase 1) (D-fructose-6-phosphate amidotransferase 1) (GFAT 1)                                                                        |
| P39447 | Tight junction protein ZO-1 (Zonula occludens 1 protein) (Zona occludens 1 protein) (Tight junction                                                                                                                                               |
| Q569Z6 | Thyroid hormone receptor-associated protein 3 (Thyroid hormone receptor-associated protein complex 150 kDa component) (Trap150) - Mus musculus (Mouse)                                                                                            |
| Q99MY8 | Probable histone-lysine N-methyltransferase ASH1L (EC 2.1.1.43) (ASH1-like protein) (Absent small and homeotic disks protein 1 homolog) - Mus musculus (Mouse)                                                                                    |
| P97434 | Myosin phosphatase Rho-interacting protein (Rho-interacting protein 3) (p116Rip) (RIP3) - Mus                                                                                                                                                     |
| P70670 | Nascent polypeptide-associated complex subunit alpha, muscle-specific form (Alpha-NAC, muscle-specific form) - Mus musculus (Mouse)                                                                                                               |
| P16627 | Heat shock 70 kDa protein 1L (Heat shock 70 kDa protein 1-like) (Heat shock 70 kDa-like protein 1) (Spermatid-specific heat shock protein 70) - Mus musculus (Mouse)                                                                              |
| O70228 | Probable phospholipid-transporting ATPase IIA (EC 3.6.3.1) (ATPase class II type 9A) - Mus                                                                                                                                                        |
| Q9QYB1 | Chloride intracellular channel protein 4 (mc3s5/mtCLIC) - Mus musculus (Mouse)                                                                                                                                                                    |
| P58043 | Sestrin-2 - Mus musculus (Mouse)                                                                                                                                                                                                                  |
| Q02956 | Protein kinase C zeta type (EC 2.7.11.13) (nPKC-zeta) - Mus musculus (Mouse)                                                                                                                                                                      |
| Q9DBG5 | Mannose-6-phosphate receptor-binding protein 1 (Cargo selection protein TIP47) - Mus musculus                                                                                                                                                     |
| P56480 | ATP synthase subunit beta, mitochondrial precursor (EC 3.6.3.14) - Mus musculus (Mouse)                                                                                                                                                           |
| Q9DBP5 | UMP-CMP kinase (EC 2.7.4.14) (Cytidylate kinase) (Deoxycytidylate kinase) (Cytidine monophosphate kinase) (Uridine monophosphate/cytidine monophosphate kinase) (UMP/CMP kinase) (UMP/CMPK) (Uridine monophosphate kinase) - Mus musculus (Mouse) |
| O54887 | Testis-specific serine kinase substrate (Testis-specific kinase substrate) (STK22 substrate 1) - Mus                                                                                                                                              |
| P25233 | Necdin - Mus musculus (Mouse)                                                                                                                                                                                                                     |
| P62751 | 60S ribosomal protein L23a - Mus musculus (Mouse)                                                                                                                                                                                                 |
| Q3TXS7 | 26S proteasome non-ATPase regulatory subunit 1 (26S proteasome regulatory subunit RPN2) (26S proteasome regulatory subunit S1) - Mus musculus (Mouse)                                                                                             |
| Q8K1F9 | Lactase-like protein precursor (Kltho/lactase-phlorizin hydrolase-related protein) - Mus musculus                                                                                                                                                 |

|        |                                                                                                                                                                                                           |
|--------|-----------------------------------------------------------------------------------------------------------------------------------------------------------------------------------------------------------|
| Q9D8V0 | Minor histocompatibility antigen H13 (EC 3.4.99.-) (Signal peptide peptidase) (Presenilin-like protein)                                                                                                   |
| Q8K045 | Serine/threonine-protein kinase N3 (EC 2.7.11.13) (Protein kinase PKN-beta) (Protein-kinase C-related kinase 3) - Mus musculus (Mouse)                                                                    |
| Q6P3Y5 | Suppressor of hairy wing homolog 3 - Mus musculus (Mouse)                                                                                                                                                 |
| Q8R5F3 | Uncharacterized protein C6orf130 homolog - Mus musculus (Mouse)                                                                                                                                           |
| P58681 | Toll-like receptor 7 precursor - Mus musculus (Mouse)                                                                                                                                                     |
| Q4VGL6 | Roquin (RING finger and C3H zinc finger protein 1) (Sanroque protein) - Mus musculus (Mouse)                                                                                                              |
| P60710 | Actin, cytoplasmic 1 (Beta-actin) - Mus musculus (Mouse)                                                                                                                                                  |
| Q8VBX6 | Multiple PDZ domain protein (Multi-PDZ domain protein 1) - Mus musculus (Mouse)                                                                                                                           |
| Q8CDN8 | Coiled-coil domain-containing protein 38 - Mus musculus (Mouse)                                                                                                                                           |
| P62264 | 40S ribosomal protein S14 - Mus musculus (Mouse)                                                                                                                                                          |
| P25444 | 40S ribosomal protein S2 (S4) (LLRep3 protein) - Mus musculus (Mouse)                                                                                                                                     |
| Q80TS7 | Dendrin - Mus musculus (Mouse)                                                                                                                                                                            |
| Q61656 | Probable ATP-dependent RNA helicase DDX5 (EC 3.6.1.-) (DEAD box protein 5) (RNA helicase p68) (DEAD box RNA helicase DEAD1) (mDEAD1) - Mus musculus (Mouse)                                               |
| Q91Z67 | SLIT-ROBO Rho GTPase-activating protein 2 (srGAP2) (Formin-binding protein 2) (Formin-binding protein 27) (FBP-27) - Mus musculus (Mouse)                                                                 |
| P62991 | Ubiquitin - Mus musculus (Mouse)                                                                                                                                                                          |
| Q61696 | Heat shock 70 kDa protein 1A (Heat shock 70 kDa protein 3) (HSP70.3) (Hsp68) - Mus musculus                                                                                                               |
| Q9CR57 | 60S ribosomal protein L14 - Mus musculus (Mouse)                                                                                                                                                          |
| Q61699 | Heat-shock protein 105 kDa (Heat shock-related 100 kDa protein E7I) (HSP-E7I) (Heat shock 110 kDa protein) (42 degrees C-HSP) - Mus musculus (Mouse)                                                      |
| P27659 | 60S ribosomal protein L3 (J1 protein) - Mus musculus (Mouse)                                                                                                                                              |
| Q8BX70 | Vacuolar protein sorting-associated protein 13C - Mus musculus (Mouse)                                                                                                                                    |
| Q64237 | Dopamine beta-hydroxylase precursor (EC 1.14.17.1) (Dopamine beta-monoxygenase) - Mus                                                                                                                     |
| Q99LG2 | Transportin-2 (Karyopherin beta-2b) - Mus musculus (Mouse)                                                                                                                                                |
| Q9CQ65 | S-methyl-5-thioadenosine phosphorylase (EC 2.4.2.28) (5~-methylthioadenosine phosphorylase) (MTA phosphorylase) (MTAPase) - Mus musculus (Mouse)                                                          |
| Q60673 | Receptor-type tyrosine-protein phosphatase-like N precursor (R-PTP-N) (PTP IA-2) - Mus musculus                                                                                                           |
| P14148 | 60S ribosomal protein L7 - Mus musculus (Mouse)                                                                                                                                                           |
| Q6PFD5 | Disks large-associated protein 3 (DAP-3) (SAP90/PSD-95-associated protein 3) (SAPAP3) (PSD-95/SAP90-binding protein 3) - Mus musculus (Mouse)                                                             |
| Q03172 | Zinc finger protein 40 (Transcription factor alphaA-CRYBP1) (Alpha A-crystallin-binding protein I) (Alpha A-CRYBP1) - Mus musculus (Mouse)                                                                |
| P14869 | 60S acidic ribosomal protein P0 (L10E) - Mus musculus (Mouse)                                                                                                                                             |
| P17751 | Triosephosphate isomerase (EC 5.3.1.1) (TIM) (Triose-phosphate isomerase) - Mus musculus                                                                                                                  |
| P08551 | Neurofilament triplet L protein (68 kDa neurofilament protein) (Neurofilament light polypeptide) (NF-                                                                                                     |
| Q920E5 | Farnesyl pyrophosphate synthetase (FPP synthetase) (FPS) (Farnesyl diphosphate synthetase) (Cholesterol-regulated 39 kDa protein) (CR 39) [Includes: Dimethylallyltransferase (EC 2.5.1.1);               |
| Q60692 | Proteasome subunit beta type 6 precursor (EC 3.4.25.1) (Proteasome delta chain) (Macropain delta chain) (Multicatalytic endopeptidase complex delta chain) (Proteasome subunit Y) - Mus musculus          |
| P51410 | 60S ribosomal protein L9 - Mus musculus (Mouse)                                                                                                                                                           |
| Q8BMJ2 | Leucyl-tRNA synthetase, cytoplasmic (EC 6.1.1.4) (Leucine--tRNA ligase) (LeuRS) - Mus musculus                                                                                                            |
| P61294 | Ras-related protein Rab-6B - Mus musculus (Mouse)                                                                                                                                                         |
| Q7TQI3 | Ubiquitin thioesterase protein OTUB1 (EC 3.4.-.-) (Otubain-1) (OTU domain-containing ubiquitin aldehyde-binding protein 1) (Ubiquitin-specific-processing protease OTUB1) (Deubiquitinating               |
| Q6ZQ12 | Ninein-like protein - Mus musculus (Mouse)                                                                                                                                                                |
| Q64707 | U2 small nuclear ribonucleoprotein auxiliary factor 35 kDa subunit-related protein 1 (U2(RNU2) small nuclear RNA auxiliary factor 1-like 1) (CCCH type zinc finger, RNA-binding motif and serine/arginine |
| Q91YJ5 | Translation initiation factor IF-2, mitochondrial precursor (IF-2Mt) (IF-2(Mt)) - Mus musculus (Mouse)                                                                                                    |
| Q52K18 | Serine/arginine repetitive matrix protein 1 (Plenty-of-prolines 101) - Mus musculus (Mouse)                                                                                                               |

|        |                                                                                                                                                                                              |
|--------|----------------------------------------------------------------------------------------------------------------------------------------------------------------------------------------------|
| Q8CD91 | SPARC-related modular calcium-binding protein 2 precursor (Secreted modular calcium-binding protein 2) (SMOC-2) - Mus musculus (Mouse)                                                       |
| Q99PV0 | Pre-mRNA-processing-splicing factor 8 (Splicing factor Prp8) - Mus musculus (Mouse)                                                                                                          |
| Q9CWF2 | Tubulin beta-2B chain - Mus musculus (Mouse)                                                                                                                                                 |
| P68040 | Guanine nucleotide-binding protein subunit beta 2-like 1 (Receptor of activated protein kinase C 1) (RACK1) (Receptor for activated C kinase) (p205) (12-3) - Mus musculus (Mouse)           |
| P99024 | Tubulin beta-5 chain - Mus musculus (Mouse)                                                                                                                                                  |
| Q9QYC1 | Pecanex-like protein 1 (Pecanex homolog) - Mus musculus (Mouse)                                                                                                                              |
| O88799 | Zonadhesin precursor - Mus musculus (Mouse)                                                                                                                                                  |
| Q80TP3 | Ubiquitin-protein ligase EDD1 (EC 6.3.2.-) (Hyperplastic discs protein homolog) - Mus musculus                                                                                               |
| Q6PHN9 | Ras-related protein Rab-35 - Mus musculus (Mouse)                                                                                                                                            |
| Q8C9S8 | Cysteine protease ATG4A (EC 3.4.22.-) (Autophagy-related protein 4 homolog A) (Autophagin-2) (Autophagy-related cysteine endopeptidase 2) (AUT-like 2 cysteine endopeptidase) - Mus musculus |
| P29391 | Ferritin light chain 1 (Ferritin L subunit 1) - Mus musculus (Mouse)                                                                                                                         |
| Q8CAY6 | Acetyl-CoA acetyltransferase, cytosolic (EC 2.3.1.9) (Cytosolic acetoacetyl-CoA thiolase) - Mus                                                                                              |
| Q9WV07 | Epidermis-type lipoxygenase 3 (EC 1.13.11.-) (e-LOX-3) - Mus musculus (Mouse)                                                                                                                |
| Q62168 | Keratin, type I cuticular Ha2 (Hair keratin, type I Ha2) (Keratin-32) - Mus musculus (Mouse)                                                                                                 |
| P43275 | Histone H1.1 (H1 VAR.3) (H1a) - Mus musculus (Mouse)                                                                                                                                         |
| Q99LD8 | NG,NG-dimethylarginine dimethylaminohydrolase 2 (EC 3.5.3.18) (Dimethylargininase-2) (Dimethylarginine dimethylaminohydrolase 2) (DDAHII) (DDAH-2) - Mus musculus (Mouse)                    |
| Q8K4L3 | Supervillin (Archvillin) (p205/p250) - Mus musculus (Mouse)                                                                                                                                  |
| Q9Z0T6 | Polycystic kidney disease and receptor for egg jelly-related protein precursor (PKD and REJ                                                                                                  |
| P61979 | Heterogeneous nuclear ribonucleoprotein K - Mus musculus (Mouse)                                                                                                                             |
| P61164 | Alpha-centractin (Centractin) (Centrosome-associated actin homolog) (Actin-RPV) (ARP1) - Mus                                                                                                 |
| Q8K1N2 | Pleckstrin homology-like domain family B member 2 (Protein LL5-beta) - Mus musculus (Mouse)                                                                                                  |
| P68033 | Actin, alpha cardiac muscle 1 (Alpha-cardiac actin) - Mus musculus (Mouse)                                                                                                                   |
| O88444 | Adenylate cyclase type 1 (EC 4.6.1.1) (Adenylate cyclase type 1) (ATP pyrophosphate-lyase 1) (Adenylyl cyclase 1) (Ca(2+)/calmodulin-activated adenylyl cyclase) - Mus musculus (Mouse)      |
| P68372 | Tubulin beta-2C chain - Mus musculus (Mouse)                                                                                                                                                 |
| Q924W6 | Tripartite motif-containing protein 66 - Mus musculus (Mouse)                                                                                                                                |
| P42932 | T-complex protein 1 subunit theta (TCP-1-theta) (CCT-theta) - Mus musculus (Mouse)                                                                                                           |
| O70435 | Proteasome subunit alpha type 3 (EC 3.4.25.1) (Proteasome component C8) (Macropain subunit C8) (Multicatalytic endopeptidase complex subunit C8) (Proteasome subunit K) - Mus musculus       |
| P61161 | Actin-like protein 2 (Actin-related protein 2) - Mus musculus (Mouse)                                                                                                                        |
| P40142 | Transketolase (EC 2.2.1.1) (TK) (P68) - Mus musculus (Mouse)                                                                                                                                 |
| Q9CXW4 | 60S ribosomal protein L11 - Mus musculus (Mouse)                                                                                                                                             |
| Q8CG48 | Structural maintenance of chromosomes protein 2 (Chromosome-associated protein E) (XCAP-E homolog) (FGF-inducible protein 16) - Mus musculus (Mouse)                                         |
| Q8BGR5 | Protein FAM53B - Mus musculus (Mouse)                                                                                                                                                        |
| Q7TMM9 | Tubulin beta-2A chain - Mus musculus (Mouse)                                                                                                                                                 |
| Q9QZ09 | Putative homeodomain transcription factor 1 - Mus musculus (Mouse)                                                                                                                           |
| Q61983 | Sodium-dependent phosphate transport protein 1 (Sodium/phosphate cotransporter 1) (Na(+)/PI cotransporter 1) (Solute carrier family 17 member 1) (Renal sodium-dependent phosphate transport |
| P63042 | Stathmin-4 (Stathmin-like protein B3) (RB3) - Mus musculus (Mouse)                                                                                                                           |
| Q8C7H1 | Methylmalonic aciduria type A homolog, mitochondrial precursor - Mus musculus (Mouse)                                                                                                        |
| Q80U87 | Ubiquitin carboxyl-terminal hydrolase 8 (EC 3.1.2.15) (Ubiquitin thioesterase 8) (Ubiquitin-specific-processing protease 8) (Deubiquitinating enzyme 8) (mUBPy) - Mus musculus (Mouse)       |
| P62717 | 60S ribosomal protein L18a - Mus musculus (Mouse)                                                                                                                                            |
| P16125 | L-lactate dehydrogenase B chain (EC 1.1.1.27) (LDH-B) (LDH heart subunit) (LDH-H) - Mus                                                                                                      |
| P17156 | Heat shock-related 70 kDa protein 2 (Heat shock protein 70.2) - Mus musculus (Mouse)                                                                                                         |
| Q3UXZ6 | Protein FAM81A - Mus musculus (Mouse)                                                                                                                                                        |
| Q68ED2 | Metabotropic glutamate receptor 7 precursor (mGluR7) - Mus musculus (Mouse)                                                                                                                  |

|        |                                                                                                                                                                                               |
|--------|-----------------------------------------------------------------------------------------------------------------------------------------------------------------------------------------------|
| P84099 | 60S ribosomal protein L19 - Mus musculus (Mouse)                                                                                                                                              |
| Q35551 | Rab GTPase-binding effector protein 1 (Rabaptin-5) (Rabaptin-5alpha) - Mus musculus (Mouse)                                                                                                   |
| Q61879 | Myosin-10 (Myosin heavy chain 10) (Myosin heavy chain, nonmuscle IIb) (Nonmuscle myosin heavy chain IIb) (NMMHC II-b) (NMMHC-IIb) (Cellular myosin heavy chain, type B) (Nonmuscle myosin     |
| P62301 | 40S ribosomal protein S13 - Mus musculus (Mouse)                                                                                                                                              |
| O08709 | Peroxiredoxin-6 (EC 1.11.1.15) (Antioxidant protein 2) (1-Cys peroxiredoxin) (1-Cys PRX) (Acidic calcium-independent phospholipase A2) (EC 3.1.1.-) (aiPLA2) (Non-selenium glutathione        |
| O88291 | Zinc finger protein 326 (Zinc finger protein-associated with nuclear matrix of 75 kDa) - Mus musculus                                                                                         |
| Q80VC9 | Uncharacterized protein KIAA1543 - Mus musculus (Mouse)                                                                                                                                       |
| O35344 | Importin alpha-3 subunit (Karyopherin alpha-3 subunit) (Importin alpha Q2) - Mus musculus (Mouse)                                                                                             |
| Q9Z0P5 | Twinfilin-2 (Twinfilin-1-like protein) (A6-related protein) (mA6RP) - Mus musculus (Mouse)                                                                                                    |
| Q9D1R9 | 60S ribosomal protein L34 - Mus musculus (Mouse)                                                                                                                                              |
| Q9EQZ6 | Rap guanine nucleotide exchange factor 4 (cAMP-regulated guanine nucleotide exchange factor II) (cAMP-GEFII) (Exchange factor directly activated by cAMP 2) (Epac 2) (cAMP-dependent Rap1     |
| Q9QWK5 | Baculoviral IAP repeat-containing protein 1a (Neuronal apoptosis inhibitory protein 1) - Mus                                                                                                  |
| Q8R4K8 | Pappalysin-1 precursor (EC 3.4.24.79) (Pregnancy-associated plasma protein-A) (PAPP-A) (Insulin-like growth factor-dependent IGF-binding protein 4 protease) (IGF-dependent IGFBP-4 protease) |
| Q6NZJ6 | Eukaryotic translation initiation factor 4 gamma 1 (eIF-4-gamma 1) (eIF-4G1) (eIF-4G 1) - Mus                                                                                                 |
| P26040 | Ezrin (p81) (Cytovillin) (Villin-2) - Mus musculus (Mouse)                                                                                                                                    |
| P63038 | 60 kDa heat shock protein, mitochondrial precursor (Hsp60) (60 kDa chaperonin) (CPN60) (Heat shock protein 60) (HSP-60) (Mitochondrial matrix protein P1) (HSP-65) - Mus musculus (Mouse)     |
| P80317 | T-complex protein 1 subunit zeta (TCP-1-zeta) (CCT-zeta) (CCT-zeta-1) - Mus musculus (Mouse)                                                                                                  |
| P09041 | Phosphoglycerate kinase, testis specific (EC 2.7.2.3) - Mus musculus (Mouse)                                                                                                                  |
| P10630 | Eukaryotic initiation factor 4A-II (EC 3.6.1.-) (ATP-dependent RNA helicase eIF4A-2) (eIF4A-II) (eIF-                                                                                         |
| P63017 | Heat shock cognate 71 kDa protein (Heat shock 70 kDa protein 8) - Mus musculus (Mouse)                                                                                                        |
| P05532 | Mast/stem cell growth factor receptor precursor (EC 2.7.10.1) (SCFR) (Proto-oncogene tyrosine-protein kinase Kit) (c-kit) (CD117 antigen) - Mus musculus (Mouse)                              |
| P62900 | 60S ribosomal protein L31 - Mus musculus (Mouse)                                                                                                                                              |
| Q9D9P2 | Coiled-coil domain-containing protein 103 - Mus musculus (Mouse)                                                                                                                              |
| Q9JI78 | Peptide-N(4)-(N-acetyl-beta-glucosaminyl)asparagine amidase (EC 3.5.1.52) (PNGase) (mPNGase) (Peptide:N-glycanase) (N-glycanase 1) - Mus musculus (Mouse)                                     |
| P41105 | 60S ribosomal protein L28 - Mus musculus (Mouse)                                                                                                                                              |
| Q9CZX8 | 40S ribosomal protein S19 - Mus musculus (Mouse)                                                                                                                                              |
| P47963 | 60S ribosomal protein L13 (A52) - Mus musculus (Mouse)                                                                                                                                        |
| P53762 | Aryl hydrocarbon receptor nuclear translocator (ARNT protein) (Dioxin receptor, nuclear translocator) (Hypoxia-inducible factor 1 beta) (HIF-1 beta) - Mus musculus (Mouse)                   |
| P97287 | Induced myeloid leukemia cell differentiation protein Mcl-1 homolog (Bcl-2-related protein EAT/mcl1)                                                                                          |
| P47757 | F-actin capping protein subunit beta (CapZ beta) - Mus musculus (Mouse)                                                                                                                       |
| Q9QUK4 | Baculoviral IAP repeat-containing protein 1b (Neuronal apoptosis inhibitory protein 2) - Mus                                                                                                  |
| Q8K2A7 | Integrator complex subunit 10 (Int10) - Mus musculus (Mouse)                                                                                                                                  |
| Q9D8N3 | Transmembrane protein 86A - Mus musculus (Mouse)                                                                                                                                              |
| P26043 | Radixin (ESP10) - Mus musculus (Mouse)                                                                                                                                                        |
| Q9R1X4 | Timeless homolog (mTim) - Mus musculus (Mouse)                                                                                                                                                |
| P49722 | Proteasome subunit alpha type 2 (EC 3.4.25.1) (Proteasome component C3) (Macropain subunit C3) (Multicatalytic endopeptidase complex subunit C3) - Mus musculus (Mouse)                       |
| P97461 | 40S ribosomal protein S5 - Mus musculus (Mouse)                                                                                                                                               |
| Q8BHK0 | Paraneoplastic antigen Ma2 homolog - Mus musculus (Mouse)                                                                                                                                     |
| Q8K2I9 | F-box only protein 18 (EC 3.6.1.-) (F-box DNA helicase 1) - Mus musculus (Mouse)                                                                                                              |
| P63073 | Eukaryotic translation initiation factor 4E (eIF4E) (eIF-4E) (mRNA cap-binding protein) (eIF-4F 25                                                                                            |
| Q64105 | Sepiapterin reductase (EC 1.1.1.153) (SPR) - Mus musculus (Mouse)                                                                                                                             |
| Q9Z1Q5 | Chloride intracellular channel protein 1 (Nuclear chloride ion channel 27) (NCC27) - Mus musculus                                                                                             |

|        |                                                                                                                                                                                                 |
|--------|-------------------------------------------------------------------------------------------------------------------------------------------------------------------------------------------------|
| Q8BYH8 | Chromodomain-helicase-DNA-binding protein 9 (EC 3.6.1.-) (ATP-dependent helicase CHD9) (CHD-9) (Peroxisomal proliferator-activated receptor A-interacting complex 320 kDa protein) (PPAR-alpha- |
| Q9WTU3 | Sodium channel protein type 8 subunit alpha (Sodium channel protein type VIII subunit alpha) (Voltage-gated sodium channel subunit alpha Nav1.6) - Mus musculus (Mouse)                         |
| P17918 | Proliferating cell nuclear antigen (PCNA) (Cyclin) - Mus musculus (Mouse)                                                                                                                       |
| Q9WV89 | Syntaxin-binding protein 4 (Syntaxin 4-interacting protein) (STX4-interacting protein) (Synip) - Mus                                                                                            |
| O35664 | Interferon-alpha/beta receptor beta chain precursor (IFN-alpha-REC) (Type I interferon receptor) (IFN-R) (Interferon alpha/beta receptor 2) - Mus musculus (Mouse)                              |
| P27924 | Ubiquitin-conjugating enzyme E2-25 kDa (EC 6.3.2.19) (Ubiquitin-protein ligase) (Ubiquitin carrier protein) (E2(25K)) (Huntingtin-interacting protein 2) (HIP-2) - Mus musculus (Mouse)         |
| Q9WUJ8 | Origin recognition complex subunit 6 - Mus musculus (Mouse)                                                                                                                                     |
| Q9D6F9 | Tubulin beta-4 chain - Mus musculus (Mouse)                                                                                                                                                     |
| Q61390 | T-complex protein 1 subunit zeta-2 (TCP-1-zeta-2) (CCT-zeta-2) (Cctz-2) - Mus musculus (Mouse)                                                                                                  |
| O88844 | Isocitrate dehydrogenase [NADP] cytoplasmic (EC 1.1.1.42) (Cytosolic NADP-isocitrate dehydrogenase) (Oxalosuccinate decarboxylase) (IDH) (NADP(+)-specific ICDH) (IDP) - Mus                    |
| P11103 | Poly [ADP-ribose] polymerase 1 (EC 2.4.2.30) (PARP-1) (ADPRT) (NAD(+) ADP-ribosyltransferase 1) (Poly[ADP-ribose] synthetase 1) (msPARP) - Mus musculus (Mouse)                                 |
| Q922F4 | Tubulin beta-6 chain - Mus musculus (Mouse)                                                                                                                                                     |
| P97351 | 40S ribosomal protein S3a - Mus musculus (Mouse)                                                                                                                                                |
| Q9ERD7 | Tubulin beta-3 chain - Mus musculus (Mouse)                                                                                                                                                     |
| Q80UE6 | Serine/threonine-protein kinase WNK4 (EC 2.7.11.1) (Protein kinase with no lysine 4) (Protein kinase, lysine-deficient 4) - Mus musculus (Mouse)                                                |
| P10649 | Glutathione S-transferase Mu 1 (EC 2.5.1.18) (GST class-mu 1) (Glutathione S-transferase GT8.7) (pmGT10) (GST 1-1) - Mus musculus (Mouse)                                                       |
| Q9DCT8 | Cysteine-rich protein 2 (CRP2) (Heart LIM protein) - Mus musculus (Mouse)                                                                                                                       |
| Q9DCH4 | Eukaryotic translation initiation factor 3 subunit 5 (eIF-3 epsilon) (eIF3 p47 subunit) (eIF3f) - Mus                                                                                           |
| Q62084 | Protein phosphatase 1 regulatory subunit 14B (Phosphatase holoenzyme inhibitor 1) (PHI-1) (Phospholipase C beta 3 neighbouring gene protein) - Mus musculus (Mouse)                             |
| Q5EBG6 | Heat-shock protein beta-6 (HspB6) - Mus musculus (Mouse)                                                                                                                                        |
| P60867 | 40S ribosomal protein S20 - Mus musculus (Mouse)                                                                                                                                                |
| Q921P9 | Transcription elongation factor A protein-like 1 (TCEA-like protein 1) (Transcription elongation factor S-II protein-like 1) - Mus musculus (Mouse)                                             |
| Q7TNS7 | Amiloride-sensitive cation channel 4 (Acid-sensing ion channel 4) - Mus musculus (Mouse)                                                                                                        |
| Q8C7D2 | Protein cereblon (Protein PiL) - Mus musculus (Mouse)                                                                                                                                           |
| P24369 | Peptidyl-prolyl cis-trans isomerase B precursor (EC 5.2.1.8) (PPIase) (Rotamase) (Cyclophilin B) (S-cyclophilin) (SCYLP) (CYP-S1) - Mus musculus (Mouse)                                        |
| P08228 | Superoxide dismutase [Cu-Zn] (EC 1.15.1.1) - Mus musculus (Mouse)                                                                                                                               |
| Q9EST5 | Acidic leucine-rich nuclear phosphoprotein 32 family member B (Proliferation-related acidic leucine-rich protein PAL31) - Mus musculus (Mouse)                                                  |
| P97433 | Rho-guanine nucleotide exchange factor (Rho-interacting protein 2) (RhoGEF) (RIP2) - Mus                                                                                                        |
| Q9JIP4 | Pannexin-1 - Mus musculus (Mouse)                                                                                                                                                               |
| P45376 | Aldose reductase (EC 1.1.1.21) (AR) (Aldehyde reductase) - Mus musculus (Mouse)                                                                                                                 |
| P62918 | 60S ribosomal protein L8 - Mus musculus (Mouse)                                                                                                                                                 |
| P48774 | Glutathione S-transferase Mu 5 (EC 2.5.1.18) (GST class-mu 5) (Fibrous sheath component 2)                                                                                                      |
| P15626 | Glutathione S-transferase Mu 2 (EC 2.5.1.18) (GST class-mu 2) (Glutathione S-transferase pmGT2)                                                                                                 |
| O88811 | Signal transducing adapter molecule 2 (STAM-2) (Hrs-binding protein) - Mus musculus (Mouse)                                                                                                     |
| P61255 | 60S ribosomal protein L26 (Silica-induced gene 20 protein) (SIG-20) - Mus musculus (Mouse)                                                                                                      |
| Q8BJY1 | 26S proteasome non-ATPase regulatory subunit 5 (26S proteasome subunit S5B) (26S protease subunit S5 basic) - Mus musculus (Mouse)                                                              |
| P80318 | T-complex protein 1 subunit gamma (TCP-1-gamma) (CCT-gamma) (Matricin) (mTRiC-P5) - Mus                                                                                                         |
| P97310 | DNA replication licensing factor MCM2 (Minichromosome maintenance protein 2 homolog) (Nuclear protein BM28) - Mus musculus (Mouse)                                                              |

|        |                                                                                                                                                                                                 |
|--------|-------------------------------------------------------------------------------------------------------------------------------------------------------------------------------------------------|
| O35071 | Kinesin-like protein KIF1C - Mus musculus (Mouse)                                                                                                                                               |
| P14152 | Malate dehydrogenase, cytoplasmic (EC 1.1.1.37) (Cytosolic malate dehydrogenase) - Mus                                                                                                          |
| Q8BMA6 | Signal recognition particle 68 kDa protein (SRP68) - Mus musculus (Mouse)                                                                                                                       |
| Q8R310 | Transmembrane and coiled-coil domains protein 3 - Mus musculus (Mouse)                                                                                                                          |
| P60843 | Eukaryotic initiation factor 4A-I (EC 3.6.1.-) (ATP-dependent RNA helicase eIF4A-1) (eIF4A-I) (eIF-                                                                                             |
| P56399 | Ubiquitin carboxyl-terminal hydrolase 5 (EC 3.1.2.15) (Ubiquitin thioesterase 5) (Ubiquitin-specific-processing protease 5) (Deubiquitinating enzyme 5) (Isopeptidase T) - Mus musculus (Mouse) |
| Q9CPU0 | Lactoylglutathione lyase (EC 4.4.1.5) (Methylglyoxalase) (Aldoketomutase) (Glyoxalase I) (Glx I) (Ketone-aldehyde mutase) (S-D-lactoylglutathione methylglyoxal lyase) - Mus musculus (Mouse)   |
| Q9CY58 | Plasminogen activator inhibitor 1 RNA-binding protein (PAI1 RNA-binding protein 1) (PAI-RBP1) (SERPINE1 mRNA-binding protein 1) - Mus musculus (Mouse)                                          |
| Q9EPL9 | Acyl-coenzyme A oxidase 3, peroxisomal (EC 1.3.3.6) (Pristanoyl-CoA oxidase) (Branched-chain acyl-CoA oxidase) (BRCACoX) - Mus musculus (Mouse)                                                 |
| O70250 | Phosphoglycerate mutase 2 (EC 5.4.2.1) (EC 5.4.2.4) (EC 3.1.3.13) (Phosphoglycerate mutase isozyme M) (PGAM-M) (BPG-dependent PGAM 2) (Muscle-specific phosphoglycerate mutase) - Mus           |
| O89019 | Inversin (Inversion of embryo turning protein) (Nephrocystin-2) - Mus musculus (Mouse)                                                                                                          |
| O55236 | mRNA capping enzyme (HCE) (MCE1) [Includes: Polynucleotide 5~-triphosphatase (EC 3.1.3.33) (mRNA 5~-triphosphatase) (TPase); mRNA guanylyltransferase (EC 2.7.7.50) (GTP--RNA                   |
| P47962 | 60S ribosomal protein L5 - Mus musculus (Mouse)                                                                                                                                                 |
| Q6ZVV3 | 60S ribosomal protein L10 (QM protein homolog) - Mus musculus (Mouse)                                                                                                                           |
| Q7TQH0 | Ataxin-2-like protein - Mus musculus (Mouse)                                                                                                                                                    |
| Q99MR6 | Arsenite-resistance protein 2 - Mus musculus (Mouse)                                                                                                                                            |
| Q9JKV1 | Adhesion-regulating molecule 1 precursor (110 kDa cell membrane glycoprotein) (Gp110) (ARM-1) -                                                                                                 |
| Q61206 | Platelet-activating factor acetylhydrolase IB subunit beta (EC 3.1.1.47) (PAF acetylhydrolase 30 kDa subunit) (PAF-AH 30 kDa subunit) (PAF-AH subunit beta) (PAFAH subunit beta) - Mus musculus |
| O35660 | Glutathione S-transferase Mu 6 (EC 2.5.1.18) (GST class-mu 6) (Glutathione-S-transferase class                                                                                                  |
| P09411 | Phosphoglycerate kinase 1 (EC 2.7.2.3) - Mus musculus (Mouse)                                                                                                                                   |
| Q68FL6 | Methionyl-tRNA synthetase, cytoplasmic (EC 6.1.1.10) (Methionine--tRNA ligase) (MetRS) - Mus                                                                                                    |
| P53026 | 60S ribosomal protein L10a (CSA-19) (Protein NEDD6) (Neural precursor cell expressed developmentally down-regulated protein 6) - Mus musculus (Mouse)                                           |
| Q8K0Z7 | Coiled-coil domain-containing protein 44 - Mus musculus (Mouse)                                                                                                                                 |
| Q9JIC3 | DNA cross-link repair 1A protein - Mus musculus (Mouse)                                                                                                                                         |
| O08553 | Dihydropyrimidinase-related protein 2 (DRP-2) (ULIP 2 protein) - Mus musculus (Mouse)                                                                                                           |
| Q8VEE0 | Ribulose-phosphate 3-epimerase (EC 5.1.3.1) (Ribulose-5-phosphate-epimerase) - Mus musculus                                                                                                     |
| Q9Z2U1 | Proteasome subunit alpha type 5 (EC 3.4.25.1) (Proteasome zeta chain) (Macropain zeta chain) (Multicatalytic endopeptidase complex zeta chain) - Mus musculus (Mouse)                           |
| Q8CDK3 | IQ and ubiquitin-like domain-containing protein FLJ35834 homolog - Mus musculus (Mouse)                                                                                                         |
| P62843 | 40S ribosomal protein S15 (RIG protein) - Mus musculus (Mouse)                                                                                                                                  |
| Q9R016 | Baculoviral IAP repeat-containing protein 1e (Neuronal apoptosis inhibitory protein 5) - Mus                                                                                                    |
| Q9EQH3 | Vacuolar protein sorting-associated protein 35 (Vesicle protein sorting 35) (Maternal-embryonic 3) -                                                                                            |
| Q9CWS0 | NG,NG-dimethylarginine dimethylaminohydrolase 1 (EC 3.5.3.18) (Dimethylargininase-1) (Dimethylarginine dimethylaminohydrolase 1) (DDAHI) (DDAH-1) - Mus musculus (Mouse)                        |
| P47911 | 60S ribosomal protein L6 (TAX-responsive enhancer element-binding protein 107) (TAXREB107) -                                                                                                    |
| P08249 | Malate dehydrogenase, mitochondrial precursor (EC 1.1.1.37) - Mus musculus (Mouse)                                                                                                              |
| P10166 | L-myc-1 proto-oncogene protein - Mus musculus (Mouse)                                                                                                                                           |
| P68037 | Ubiquitin-conjugating enzyme E2 L3 (EC 6.3.2.19) (Ubiquitin-protein ligase L3) (Ubiquitin carrier protein L3) (UbcM4) - Mus musculus (Mouse)                                                    |
| O08983 | Hermansky-Pudlak syndrome 1 protein homolog - Mus musculus (Mouse)                                                                                                                              |
| P56959 | RNA-binding protein FUS (Pigpen protein) - Mus musculus (Mouse)                                                                                                                                 |
| P14115 | 60S ribosomal protein L27a (L29) - Mus musculus (Mouse)                                                                                                                                         |
| Q07813 | Apoptosis regulator BAX, membrane isoform alpha - Mus musculus (Mouse)                                                                                                                          |
| Q9DBR1 | 5~-3~ exoribonuclease 2 (EC 3.1.13.-) (Protein Dhml) - Mus musculus (Mouse)                                                                                                                     |

|        |                                                                                                                                                                                                 |
|--------|-------------------------------------------------------------------------------------------------------------------------------------------------------------------------------------------------|
| P62267 | 40S ribosomal protein S23 - Mus musculus (Mouse)                                                                                                                                                |
| P62830 | 60S ribosomal protein L23 - Mus musculus (Mouse)                                                                                                                                                |
| Q8BKT3 | GC-rich sequence DNA-binding factor (GCF) (Transcription factor 9) (TCF-9) - Mus musculus                                                                                                       |
| Q8VD72 | Tetratricopeptide repeat protein 8 (TPR repeat protein 8) (Bardet-Biedl syndrome 8 protein homolog)                                                                                             |
| P61089 | Ubiquitin-conjugating enzyme E2 N (EC 6.3.2.19) (Ubiquitin-protein ligase N) (Ubiquitin carrier protein N) (Ubc13) (Bendless-like ubiquitin-conjugating enzyme) - Mus musculus (Mouse)          |
| P70268 | Serine/threonine-protein kinase N1 (EC 2.7.11.13) (Protein kinase C-like 1) (Protein-kinase C-related kinase 1) (Protein kinase C-like PKN) (Serine-threonine protein kinase N) - Mus musculus  |
| Q9QUM9 | Proteasome subunit alpha type 6 (EC 3.4.25.1) (Proteasome iota chain) (Macropain iota chain) (Multicatalytic endopeptidase complex iota chain) - Mus musculus (Mouse)                           |
| Q8JZK9 | Hydroxymethylglutaryl-CoA synthase, cytoplasmic (EC 2.3.3.10) (HMG-CoA synthase) (3-hydroxy-3-methylglutaryl coenzyme A synthase) - Mus musculus (Mouse)                                        |
| P62855 | 40S ribosomal protein S26 - Mus musculus (Mouse)                                                                                                                                                |
| P47915 | 60S ribosomal protein L29 - Mus musculus (Mouse)                                                                                                                                                |
| Q9WVA4 | Transgelin-2 - Mus musculus (Mouse)                                                                                                                                                             |
| Q9R1Q8 | Transgelin-3 (Neuronal protein NP25) - Mus musculus (Mouse)                                                                                                                                     |
| P21180 | Complement C2 precursor (EC 3.4.21.43) (C3/C5 convertase) [Contains: Complement C2b fragment; Complement C2a fragment] - Mus musculus (Mouse)                                                   |
| Q6Y4S4 | Metastasis-suppressor KiSS-1 precursor (Kisspeptin-1) [Contains: Metastin (Kisspeptin-52); Kisspeptin-10 (Metastin45-54)] - Mus musculus (Mouse)                                                |
| Q3TNA1 | Xylulose kinase (EC 2.7.1.17) (Xylulokinase) - Mus musculus (Mouse)                                                                                                                             |
| P04214 | T-cell receptor beta chain V region E1 precursor - Mus musculus (Mouse)                                                                                                                         |
| Q8BQQ1 | Probable palmitoyltransferase ZDHC14 (EC 2.3.1.-) (Zinc finger DHHC domain-containing protein 14) (DHHC-14) (NEW1 domain-containing protein) (NEW1CP) - Mus musculus (Mouse)                    |
| Q9D7S1 | Transmembrane protein 54 - Mus musculus (Mouse)                                                                                                                                                 |
| Q8BJU0 | Small glutamine-rich tetratricopeptide repeat-containing protein A - Mus musculus (Mouse)                                                                                                       |
| Q9CQI9 | Thyroid hormone receptor-associated protein 6 (Thyroid hormone receptor-associated protein complex 25 kDa component) (Trap25) - Mus musculus (Mouse)                                            |
| Q60879 | Olfactory receptor 3 (Olfactory receptor 136-14) (Odorant receptor K10) - Mus musculus (Mouse)                                                                                                  |
| Q99JI4 | 26S proteasome non-ATPase regulatory subunit 6 (26S proteasome regulatory subunit S10) (p42A) -                                                                                                 |
| P36895 | Bone morphogenetic protein receptor type IA precursor (EC 2.7.11.30) (Serine/threonine-protein kinase receptor R5) (SKR5) (Activin receptor-like kinase 3) (ALK-3) (BMP-2/BMP-4 receptor) - Mus |
| Q9R0P3 | S-formylglutathione hydrolase (EC 3.1.2.12) (FGH) (Esterase D) (Esterase 10) (Sid 478) - Mus                                                                                                    |
| Q9CQS6 | Blottin precursor - Mus musculus (Mouse)                                                                                                                                                        |
| P26645 | Myristoylated alanine-rich C-kinase substrate (MARCKS) - Mus musculus (Mouse)                                                                                                                   |
| P14429 | H-2 class I histocompatibility antigen, Q7 alpha chain precursor (QA-2 antigen) - Mus musculus                                                                                                  |
| P26339 | Chromogranin A precursor (CgA) [Contains: Pancreastatin; Beta-granin; WE-14] - Mus musculus                                                                                                     |
| P52927 | High mobility group protein HMGI-C (High mobility group AT-hook protein 2) - Mus musculus                                                                                                       |
| Q99K82 | Spermine oxidase (EC 1.5.3.-) (Polyamine oxidase 1) (PAO-1) (PAOh1) - Mus musculus (Mouse)                                                                                                      |
| Q9EQP6 | Arrestin-C (Cone arrestin) (cArr) (Retinal cone arrestin-3) - Mus musculus (Mouse)                                                                                                              |
| Q9EQ43 | Vomer nasal type-1 receptor B10 - Mus musculus (Mouse)                                                                                                                                          |
| P70323 | T-box transcription factor TBX1 (T-box protein 1) (Testis-specific T-box protein) - Mus musculus                                                                                                |
| Q8BV13 | COP9 signalosome complex subunit 7b (Signalosome subunit 7b) (SGN7b) (JAB1-containing signalosome subunit 7b) - Mus musculus (Mouse)                                                            |
| Q921Y0 | Mps one binder kinase activator-like 1B (Mob1 homolog 1B) - Mus musculus (Mouse)                                                                                                                |
| Q9Z2Z6 | Mitochondrial carnitine/acylcarnitine carrier protein (Carnitine/acylcarnitine translocase) (CAC) (mCAC) (Solute carrier family 25 member 20) - Mus musculus (Mouse)                            |
| Q8BWN8 | Acyl-coenzyme A thioesterase 4 (EC 3.1.2.2) (Acyl-CoA thioesterase 4) (Peroxisomal acyl coenzyme A thioester hydrolase Ib) (Peroxisomal long-chain acyl-coA thioesterase Ib) (PTE-Ib) (PTE      |
| P61514 | 60S ribosomal protein L37a - Mus musculus (Mouse)                                                                                                                                               |
| P49766 | Vascular endothelial growth factor B precursor (VEGF-B) (VEGF-related factor) (VRF) - Mus                                                                                                       |
| P24547 | Inosine 5~-monophosphate dehydrogenase 2 (EC 1.1.1.205) (IMP dehydrogenase 2) (IMPDH-II)                                                                                                        |



|        |                                                                                                                                                                                                 |
|--------|-------------------------------------------------------------------------------------------------------------------------------------------------------------------------------------------------|
| Q9D365 | Signal peptidase complex subunit 3 (EC 3.4.-.-) (Microsomal signal peptidase 23 kDa subunit) (SPase 22 kDa subunit) (SPC22/23) - Mus musculus (Mouse)                                           |
| Q8VCE1 | J domain-containing protein C21orf55 homolog - Mus musculus (Mouse)                                                                                                                             |
| P10148 | Small inducible cytokine A2 precursor (CCL2) (Monocyte chemotactic protein 1) (MCP-1) (Monocyte chemoattractant protein 1) (Platelet-derived growth factor-inducible protein JE) - Mus musculus |
| Q9D0Q7 | 39S ribosomal protein L45, mitochondrial precursor (L45mt) (MRP-L45) - Mus musculus (Mouse)                                                                                                     |
| Q61765 | Keratin, type I cuticular Ha1 (Hair keratin, type I Ha1) (Keratin-31) (HKA-1) - Mus musculus (Mouse)                                                                                            |
| Q923G2 | DNA-directed RNA polymerases I, II, and III 17.1 kDa polypeptide (EC 2.7.7.6) (RPB17) (RPB8) -                                                                                                  |
| P62315 | Small nuclear ribonucleoprotein Sm D1 (snRNP core protein D1) (Sm-D1) (Sm-D autoantigen) - Mus                                                                                                  |
| Q8BZM0 | Kelch-like protein 12 (CUL3-interacting protein 1) - Mus musculus (Mouse)                                                                                                                       |
| Q8BKJ9 | NAD-dependent deacetylase sirtuin-7 (EC 3.5.1.-) (SIR2-like protein 7) - Mus musculus (Mouse)                                                                                                   |
| P51436 | D(4) dopamine receptor (Dopamine D4 receptor) (D(2C) dopamine receptor) - Mus musculus                                                                                                          |
| Q61074 | Protein phosphatase 2C isoform gamma (EC 3.1.3.16) (PP2C-gamma) (Protein phosphatase magnesium-dependent 1 gamma) (Protein phosphatase 1C) (Fibroblast growth factor-inducible                  |
| Q8BGX3 | Leucine-rich repeat and transmembrane domain-containing protein 2 precursor - Mus musculus                                                                                                      |
| O70194 | Eukaryotic translation initiation factor 3 subunit 7 (eIF-3 zeta) (eIF3 p66) (eIF3d) - Mus musculus                                                                                             |
| P59016 | Vacuolar protein sorting-associated protein 33B - Mus musculus (Mouse)                                                                                                                          |
| P22561 | Wilms~ tumor protein homolog - Mus musculus (Mouse)                                                                                                                                             |
| O35608 | Angiopoietin-2 precursor (ANG-2) - Mus musculus (Mouse)                                                                                                                                         |
| P51637 | Caveolin-3 (M-caveolin) - Mus musculus (Mouse)                                                                                                                                                  |
| P43276 | Histone H1.5 (H1 VAR.5) (H1b) - Mus musculus (Mouse)                                                                                                                                            |
| Q80U57 | Regulating synaptic membrane exocytosis protein 3 (Nim3) (Rab-3-interacting molecule 3) (RIM 3) (RIM3 gamma) - Mus musculus (Mouse)                                                             |
| Q8BJA3 | Homeobox-containing protein 1 - Mus musculus (Mouse)                                                                                                                                            |
| Q8BG11 | RING finger protein 24 - Mus musculus (Mouse)                                                                                                                                                   |
| P63276 | 40S ribosomal protein S17 - Mus musculus (Mouse)                                                                                                                                                |
| P30545 | Alpha-2B adrenergic receptor (Alpha-2B adrenoceptor) (Alpha-2B adrenoceptor) - Mus musculus                                                                                                     |
| P08030 | Adenine phosphoribosyltransferase (EC 2.4.2.7) (APRT) - Mus musculus (Mouse)                                                                                                                    |
| Q9QX66 | Zinc-finger protein neuro-d4 (D4, zinc and double PHD fingers family 1) - Mus musculus (Mouse)                                                                                                  |
| P70180 | Atrial natriuretic peptide clearance receptor precursor (ANP-C) (ANPRC) (NPR-C) (Atrial natriuretic peptide C-type receptor) (EF-2) - Mus musculus (Mouse)                                      |
| Q6Q2Z6 | Acyl-coenzyme A thioesterase 5 (EC 3.1.2.2) (Acyl-CoA thioesterase 5) (Peroxisomal acyl-coenzyme A thioester hydrolase 1c) (Peroxisomal acyl-CoA thioesterase 1c) - Mus musculus (Mouse)        |
| Q02395 | Metal-response element-binding transcription factor 2 (Zinc-regulated factor 1) (ZiRF1) (Metal-response element DNA-binding protein M96) (Metal-regulatory transcription factor 2) (PCL2) - Mus |
| P61358 | 60S ribosomal protein L27 - Mus musculus (Mouse)                                                                                                                                                |
| P12658 | Calbindin (Vitamin D-dependent calcium-binding protein, avian-type) (Calbindin D28) (D-28K) (Spot 35 protein) (PCD-29) - Mus musculus (Mouse)                                                   |
| P09922 | Interferon-induced GTP-binding protein Mx1 (Influenza resistance protein) - Mus musculus (Mouse)                                                                                                |
| Q88569 | Heterogeneous nuclear ribonucleoproteins A2/B1 (hnRNP A2 / hnRNP B1) - Mus musculus (Mouse)                                                                                                     |
| Q922Y1 | SAPK substrate protein 1 (UBA/UBX 33.3 kDa protein) (mY33K) (Protein 2B28) - Mus musculus                                                                                                       |
| Q01065 | Calcium/calmodulin-dependent 3~,5~-cyclic nucleotide phosphodiesterase 1B (EC 3.1.4.17) (Cam-PDE 1B) (63 kDa Cam-PDE) - Mus musculus (Mouse)                                                    |
| Q80YA8 | Crumbs homolog 2 (Crumbs-like protein 2) (Fragment) - Mus musculus (Mouse)                                                                                                                      |
| Q8VDR7 | dTDP-D-glucose 4,6-dehydratase (EC 4.2.1.46) - Mus musculus (Mouse)                                                                                                                             |
| Q62203 | Splicing factor 3A subunit 2 (Spliceosome-associated protein 62) (SAP 62) (SF3a66) - Mus                                                                                                        |
| P30412 | Peptidyl-prolyl cis-trans isomerase C (EC 5.2.1.8) (PPIase) (Rotamase) (Cyclophilin C) - Mus                                                                                                    |
| P62821 | Ras-related protein Rab-1A (YPT1-related protein) - Mus musculus (Mouse)                                                                                                                        |
| Q8K183 | Pyridoxal kinase (EC 2.7.1.35) (Pyridoxine kinase) - Mus musculus (Mouse)                                                                                                                       |
| Q5XPT3 | Glycosyltransferase-like protein LARGE2 (EC 2.4.-.-) (Glycosyltransferase-like 1B) - Mus musculus                                                                                               |
| Q99J99 | 3-mercaptopyruvate sulfurtransferase (EC 2.8.1.2) (MST) - Mus musculus (Mouse)                                                                                                                  |
| Q9D1G2 | Phosphomevalonate kinase (EC 2.7.4.2) (PMKase) - Mus musculus (Mouse)                                                                                                                           |

|        |                                                                                                                                                                                                 |
|--------|-------------------------------------------------------------------------------------------------------------------------------------------------------------------------------------------------|
| P48455 | Serine/threonine-protein phosphatase 2B catalytic subunit gamma isoform (EC 3.1.3.16) (Calmodulin-dependent calcineurin A subunit gamma isoform) (Calcineurin, testis-specific catalytic        |
| O55137 | Acyl-coenzyme A thioesterase 1 (EC 3.1.2.2) (Acyl-CoA thioesterase 1) (Inducible cytosolic acyl-coenzyme A thioester hydrolase) (Long chain acyl-CoA thioester hydrolase) (Long chain acyl-CoA  |
| Q64676 | 2-hydroxyacylsphingosine 1-beta-galactosyltransferase precursor (EC 2.4.1.45) (UDP-galactose-ceramide galactosyltransferase) (Ceramide UDP-galactosyltransferase) (Cerebroside synthase) -      |
| P21300 | Aldose reductase-related protein 1 (EC 1.1.1.21) (AR) (Aldehyde reductase) (VAS deferens androgen-dependent protein) (MVDP) (Aldo-keto reductase family 1 member B7) - Mus musculus             |
| P62874 | Guanine nucleotide-binding protein G(I)/G(S)/G(T) subunit beta 1 (Transducin beta chain 1) - Mus                                                                                                |
| P54731 | FAS-associated factor 1 (Protein FAF1) - Mus musculus (Mouse)                                                                                                                                   |
| Q8C166 | Copine-1 (Copine I) - Mus musculus (Mouse)                                                                                                                                                      |
| Q31125 | Zinc transporter SLC39A7 (Solute carrier family 39 member 7) (Histidine-rich membrane protein                                                                                                   |
| Q91V01 | Membrane-bound O-acyltransferase domain-containing protein 5 (EC 2.3.-.-) (O-acyltransferase domain-containing protein 5) (Transmembrane protein PTG) - Mus musculus (Mouse)                    |
| Q8BRT1 | CLIP-associating protein 2 (Cytoplasmic linker-associated protein 2) - Mus musculus (Mouse)                                                                                                     |
| Q61839 | C-type natriuretic peptide precursor [Contains: CNP-22; CNP-29; CNP-53] - Mus musculus (Mouse)                                                                                                  |
| P59999 | Actin-related protein 2/3 complex subunit 4 (ARP2/3 complex 20 kDa subunit) (p20-ARC) - Mus                                                                                                     |
| P11440 | Cell division control protein 2 homolog (EC 2.7.11.22) (EC 2.7.11.23) (p34 protein kinase) (Cyclin-dependent kinase 1) (CDK1) - Mus musculus (Mouse)                                            |
| P62137 | Serine/threonine-protein phosphatase PP1-alpha catalytic subunit (EC 3.1.3.16) (PP-1A) - Mus                                                                                                    |
| Q9QZS3 | Protein numb homolog (m-Numb) (m-Nb) - Mus musculus (Mouse)                                                                                                                                     |
| Q9CQI6 | Coactosin-like protein - Mus musculus (Mouse)                                                                                                                                                   |
| Q8C761 | WD repeat protein 60 - Mus musculus (Mouse)                                                                                                                                                     |
| Q8BR65 | Sin3 histone deacetylase corepressor complex component SDS3 (Suppressor of defective silencing 3 protein homolog) - Mus musculus (Mouse)                                                        |
| Q99JI6 | Ras-related protein Rap-1b precursor (GTP-binding protein smg p21B) - Mus musculus (Mouse)                                                                                                      |
| Q9WVS8 | Mitogen-activated protein kinase 7 (EC 2.7.11.24) (Extracellular signal-regulated kinase 5) (ERK-5) (BMK1 kinase) - Mus musculus (Mouse)                                                        |
| P45377 | Aldose reductase-related protein 2 (EC 1.1.1.21) (AR) (Aldehyde reductase) (Fibroblast growth factor-regulated protein) (FR-1 protein) - Mus musculus (Mouse)                                   |
| Q9D2N9 | Vacuolar protein sorting-associated protein 33A - Mus musculus (Mouse)                                                                                                                          |
| Q9QUM7 | MutS protein homolog 5 - Mus musculus (Mouse)                                                                                                                                                   |
| O35685 | Nuclear migration protein nudC (Nuclear distribution protein C homolog) (Silica-induced gene 92 protein) (SIG-92) - Mus musculus (Mouse)                                                        |
| Q9JJY3 | Sphingomyelin phosphodiesterase 3 (EC 3.1.4.12) (Neutral sphingomyelinase 2) (Neutral sphingomyelinase II) (nSMase2) (nSMase-2) - Mus musculus (Mouse)                                          |
| Q8BT60 | Copine-3 (Copine III) - Mus musculus (Mouse)                                                                                                                                                    |
| P28656 | Nucleosome assembly protein 1-like 1 (NAP-1-related protein) (Brain protein DN38) - Mus musculus                                                                                                |
| Q3U0P1 | Partner and localizer of BRCA2 - Mus musculus (Mouse)                                                                                                                                           |
| Q03146 | Epithelial discoidin domain-containing receptor 1 precursor (EC 2.7.10.1) (Epithelial discoidin domain receptor 1) (Tyrosine kinase DDR) (Discoidin receptor tyrosine kinase) (Tyrosine-protein |
| Q9JI91 | Alpha-actinin-2 (Alpha actinin skeletal muscle isoform 2) (F-actin cross-linking protein) - Mus                                                                                                 |
| P02468 | Laminin subunit gamma-1 precursor (Laminin B2 chain) - Mus musculus (Mouse)                                                                                                                     |
| P46660 | Alpha-internexin (Alpha-Inx) (66 kDa neurofilament protein) (Neurofilament-66) (NF-66) - Mus                                                                                                    |
| O89112 | LanC-like protein 1 (40 kDa erythrocyte membrane protein) (p40) - Mus musculus (Mouse)                                                                                                          |
| Q9D6I3 | Profilin-4 (Profilin IV) - Mus musculus (Mouse)                                                                                                                                                 |
| P97822 | Acidic leucine-rich nuclear phosphoprotein 32 family member E (LANP-like protein) (LANP-L) (Cerebellar postnatal development protein 1) - Mus musculus (Mouse)                                  |
| Q91WK2 | Eukaryotic translation initiation factor 3 subunit 3 (eIF-3 gamma) (eIF3 p40 subunit) (eIF3h) - Mus                                                                                             |
| Q99N57 | RAF proto-oncogene serine/threonine-protein kinase (EC 2.7.11.1) (Raf-1) (C-RAF) (cRaf) - Mus                                                                                                   |
| Q9QZS6 | Heparan sulfate glucosamine 3-O-sulfotransferase 3B1 (EC 2.8.2.30) (Heparan sulfate D-glucosaminyl 3-O-sulfotransferase 3B1) (Heparan sulfate 3-O-sulfotransferase 3B1) (m3-OST-3B) -           |

|        |                                                                                                                                                                                                  |
|--------|--------------------------------------------------------------------------------------------------------------------------------------------------------------------------------------------------|
| Q2VPD4 | Aryl hydrocarbon receptor nuclear translocator-like protein 2 (Brain and muscle ARNT-like 2) - Mus                                                                                               |
| Q8R0H9 | ADP-ribosylation factor-binding protein GGA1 (Golgi-localized, gamma ear-containing, ARF-binding protein 1) (Gamma-adaptin-related protein 1) - Mus musculus (Mouse)                             |
| Q9D5V2 | Kelch-like protein 10 - Mus musculus (Mouse)                                                                                                                                                     |
| Q9QYR9 | Acyl-coenzyme A thioesterase 2, mitochondrial precursor (EC 3.1.2.2) (Acyl-CoA thioesterase 2) (Acyl coenzyme A thioester hydrolase) (Very-long-chain acyl-CoA thioesterase) (MTE-I) - Mus       |
| Q61216 | Double-strand break repair protein MRE11A (MRE11 homolog 1) (MRE11 meiotic recombination 11 homolog A) (MmMRE11A) - Mus musculus (Mouse)                                                         |
| P55264 | Adenosine kinase (EC 2.7.1.20) (AK) (Adenosine 5~-phosphotransferase) - Mus musculus (Mouse)                                                                                                     |
| Q8VI75 | Importin-4 (Importin 4a) (Imp4a) (Ran-binding protein 4) (RanBP4) - Mus musculus (Mouse)                                                                                                         |
| Q9D2Y5 | Sorting nexin-20 - Mus musculus (Mouse)                                                                                                                                                          |
| P63323 | 40S ribosomal protein S12 - Mus musculus (Mouse)                                                                                                                                                 |
| P62492 | Ras-related protein Rab-11A (Rab-11) - Mus musculus (Mouse)                                                                                                                                      |
| Q61598 | Rab GDP dissociation inhibitor beta (Rab GDI beta) (Guanosine diphosphate dissociation inhibitor 2) (GDI-2) (GDI-3) - Mus musculus (Mouse)                                                       |
| P58044 | Isopentenyl-diphosphate Delta-isomerase 1 (EC 5.3.3.2) (IPP isomerase 1) (Isopentenyl pyrophosphate isomerase 1) (IPPI1) - Mus musculus (Mouse)                                                  |
| Q80TH2 | Protein LAP2 (ErbB2-interacting protein) (Erbin) (Densin-180-like protein) - Mus musculus (Mouse)                                                                                                |
| Q8C7X2 | Uncharacterized protein KIAA0090 precursor - Mus musculus (Mouse)                                                                                                                                |
| Q8CH18 | Cell division cycle and apoptosis regulator protein 1 (Cell cycle and apoptosis regulatory protein 1)                                                                                            |
| P00536 | Proto-oncogene serine/threonine-protein kinase mos (EC 2.7.11.1) (c-mos) (Oocyte maturation                                                                                                      |
| Q6ZQ58 | La-related protein 1 (La ribonucleoprotein domain family member 1) (Fragment) - Mus musculus                                                                                                     |
| Q9CR16 | 40 kDa peptidyl-prolyl cis-trans isomerase (EC 5.2.1.8) (PPIase) (Rotamase) (Cyclophilin-40) (CYP-                                                                                               |
| Q8K2Z4 | Condensin complex subunit 1 (Non-SMC condensin I complex subunit D2) (Chromosome condensation-related SMC-associated protein 1) (Chromosome-associated protein D2) (mCAP-D2)                     |
| Q7TSG2 | RNA polymerase II subunit A C-terminal domain phosphatase (EC 3.1.3.16) (TFIIIF-associating CTD phosphatase) - Mus musculus (Mouse)                                                              |
| Q91Z69 | SLIT-ROBO Rho GTPase-activating protein 1 (srGAP1) (Rho GTPase-activating protein 13) - Mus                                                                                                      |
| Q62312 | TGF-beta receptor type-2 precursor (EC 2.7.11.30) (TGF-beta receptor type II) (TGFR-2) (TGF-beta type II receptor) (Transforming growth factor-beta receptor type II) (TbetaR-II) - Mus musculus |
| Q3TB82 | Pleckstrin homology domain-containing family F member 1 (PH domain-containing family F member 1) (Lysosome-associated apoptosis-inducing protein containing PH and FYVE domains) - Mus           |
| Q8R322 | Nucleoporin GLE1 (GLE1-like protein) - Mus musculus (Mouse)                                                                                                                                      |
| Q8VEM1 | Goliath homolog precursor (RING finger protein 130) (G1-related zinc finger protein) - Mus musculus                                                                                              |
| P11247 | Myeloperoxidase precursor (EC 1.11.1.7) (MPO) [Contains: Myeloperoxidase light chain; Myeloperoxidase heavy chain] - Mus musculus (Mouse)                                                        |
| O35164 | Mast cell protease 9 precursor (EC 3.4.21.-) (MMCP-9) - Mus musculus (Mouse)                                                                                                                     |
| Q8BZQ7 | Anaphase-promoting complex subunit 2 (APC2) (Cyclosome subunit 2) - Mus musculus (Mouse)                                                                                                         |
| Q80TZ3 | Putative tyrosine-protein phosphatase auxilin (EC 3.1.3.48) (DnaJ homolog subfamily C member 6) -                                                                                                |
| P29341 | Polyadenylate-binding protein 1 (Poly(A)-binding protein 1) (PABP 1) - Mus musculus (Mouse)                                                                                                      |
| Q6DFX2 | Anthrax toxin receptor 2 precursor - Mus musculus (Mouse)                                                                                                                                        |
| P63154 | Crooked neck-like protein 1 (Crooked neck homolog) - Mus musculus (Mouse)                                                                                                                        |
| Q9D5Y0 | Uncharacterized protein C7orf31 homolog (Protein TISP74) - Mus musculus (Mouse)                                                                                                                  |
| Q3UZW7 | Protein FAM86A - Mus musculus (Mouse)                                                                                                                                                            |
| Q6P7W0 | Sentrin-specific protease 6 (EC 3.4.22.-) (Sentrin/SUMO-specific protease SENP6) (SUMO-1-specific protease 1) - Mus musculus (Mouse)                                                             |
| Q07104 | Growth/differentiation factor 3 precursor (GDF-3) (VG-1-related protein 2) - Mus musculus (Mouse)                                                                                                |
| Q8CGV2 | Tryptophan 5-hydroxylase 2 (EC 1.14.16.4) (Tryptophan 5-monoxygenase 2) (Neuronal tryptophan hydroxylase) - Mus musculus (Mouse)                                                                 |
| Q9CVB6 | Actin-related protein 2/3 complex subunit 2 (ARP2/3 complex 34 kDa subunit) (p34-ARC) - Mus                                                                                                      |
| Q91X52 | L-xylulose reductase (EC 1.1.1.10) (XR) (Dicarbonyl/L-xylulose reductase) - Mus musculus (Mouse)                                                                                                 |
| Q8BZ36 | RAD50-interacting protein 1 (RAD50 interactor 1) (Protein RINT-1) - Mus musculus (Mouse)                                                                                                         |

|        |                                                                                                                                                                                                                                                           |
|--------|-----------------------------------------------------------------------------------------------------------------------------------------------------------------------------------------------------------------------------------------------------------|
| Q99PJ2 | Tripartite motif-containing protein 8 (RING finger protein 27) (Glioblastoma-expressed RING finger                                                                                                                                                        |
| Q8CIB9 | N-acetyltransferase ESCO2 (EC 2.3.1.-) (Establishment of cohesion 1 homolog 2) (ECO1 homolog                                                                                                                                                              |
| Q9CWH6 | Proteasome subunit alpha type 7-like (EC 3.4.25.1) - Mus musculus (Mouse)                                                                                                                                                                                 |
| Q91VC3 | Probable ATP-dependent RNA helicase DDX48 (EC 3.6.1.-) (DEAD box protein 48) - Mus musculus                                                                                                                                                               |
| Q62188 | Dihydropyrimidinase-related protein 3 (DRP-3) (Unc-33-like phosphoprotein) (ULIP protein) - Mus                                                                                                                                                           |
| Q60855 | Receptor-interacting serine/threonine-protein kinase 1 (EC 2.7.11.1) (Serine/threonine-protein kinase RIP) (Cell death protein RIP) (Receptor-interacting protein) - Mus musculus (Mouse)                                                                 |
| Q8BM75 | AT-rich interactive domain-containing protein 5B (ARID domain-containing protein 5B) (MRF1-like) (Modulator recognition factor protein 2) (MRF-2) (Developmentally and sexually retarded with                                                             |
| Q8BYK5 | Phosphatase and actin regulator 3 (Scapinin) (Scaffold-associated PP1-inhibiting protein) - Mus                                                                                                                                                           |
| Q9Z268 | RasGAP-activating-like protein 1 - Mus musculus (Mouse)                                                                                                                                                                                                   |
| Q9R0P4 | Small acidic protein (Sid 2057) - Mus musculus (Mouse)                                                                                                                                                                                                    |
| Q8CDU6 | Probable E3 ubiquitin-protein ligase HECTD2 (HECT domain-containing protein 2) - Mus musculus                                                                                                                                                             |
| Q8K0D0 | Serine/threonine-protein kinase PCTAIRE-2 (EC 2.7.11.22) (PCTAIRE-motif protein kinase 2) - Mus                                                                                                                                                           |
| Q8R2S9 | Actin-related protein 8 - Mus musculus (Mouse)                                                                                                                                                                                                            |
| Q6IFZ6 | Keratin, type II cytoskeletal 1b (Keratin-77) (Type II keratin Kb39) (Embryonic type II keratin-1) - Mus                                                                                                                                                  |
| P08553 | Neurofilament triplet M protein (160 kDa neurofilament protein) (Neurofilament medium polypeptide)                                                                                                                                                        |
| Q91VR5 | ATP-dependent RNA helicase DDX1 (EC 3.6.1.-) (DEAD box protein 1) - Mus musculus (Mouse)                                                                                                                                                                  |
| Q9JHR7 | Insulin-degrading enzyme (EC 3.4.24.56) (Insulysin) (Insulinase) (Insulin protease) - Mus musculus                                                                                                                                                        |
| P26638 | Seryl-tRNA synthetase, cytoplasmic (EC 6.1.1.11) (Serine--tRNA ligase) (SerRS) - Mus musculus                                                                                                                                                             |
| Q8K363 | ATP-dependent RNA helicase DDX18 (EC 3.6.1.-) (DEAD box protein 18) - Mus musculus (Mouse)                                                                                                                                                                |
| P42337 | Phosphatidylinositol-4,5-bisphosphate 3-kinase catalytic subunit alpha isoform (EC 2.7.1.153) (PI3-kinase p110 subunit alpha) (PtdIns-3-kinase p110) (PI3K) - Mus musculus (Mouse)                                                                        |
| Q8CCG1 | Uncharacterized protein C14orf140 homolog - Mus musculus (Mouse)                                                                                                                                                                                          |
| Q61554 | Fibrillin-1 precursor - Mus musculus (Mouse)                                                                                                                                                                                                              |
| Q9D8E6 | 60S ribosomal protein L4 (L1) - Mus musculus (Mouse)                                                                                                                                                                                                      |
| Q60862 | Origin recognition complex subunit 2 - Mus musculus (Mouse)                                                                                                                                                                                               |
| P39053 | Dynamin-1 (EC 3.6.5.5) - Mus musculus (Mouse)                                                                                                                                                                                                             |
| P97427 | Dihydropyrimidinase-related protein 1 (DRP-1) (Collapsin response mediator protein 1) (CRMP-1) (ULIP3 protein) - Mus musculus (Mouse)                                                                                                                     |
| P97496 | SWI/SNF-related matrix-associated actin-dependent regulator of chromatin subfamily C member 1 (SWI/SNF complex 155 kDa subunit) (BRG1-associated factor 155) (SWI3-related protein) - Mus                                                                 |
| Q60677 | Integrin alpha-E precursor (Integrin alpha M290) (CD103 antigen) [Contains: Integrin alpha-E light chain; Integrin alpha-E heavy chain] - Mus musculus (Mouse)                                                                                            |
| Q9Z0W3 | Nuclear pore complex protein Nup160 (Nucleoporin Nup160) (160 kDa nucleoporin) (Gene trap locus 1-13) (GTL-13) - Mus musculus (Mouse)                                                                                                                     |
| Q62371 | Discoidin domain-containing receptor 2 precursor (EC 2.7.10.1) (Discoidin domain receptor 2) (Receptor protein-tyrosine kinase TKT) (Tyrosine-protein kinase TYRO 10) (Neurotrophic tyrosine                                                              |
| P26361 | Cystic fibrosis transmembrane conductance regulator (CFTR) (cAMP-dependent chloride channel) (ATP-binding cassette transporter sub-family C member 7) - Mus musculus (Mouse)                                                                              |
| Q7TT45 | Ras-related GTP-binding protein D (Rag D) - Mus musculus (Mouse)                                                                                                                                                                                          |
| Q18PE0 | Protein Dok-7 (Downstream of tyrosine kinase 7) - Mus musculus (Mouse)                                                                                                                                                                                    |
| Q8CGF6 | WD repeat protein 47 - Mus musculus (Mouse)                                                                                                                                                                                                               |
| Q8BVQ5 | Protein phosphatase methylesterase 1 (EC 3.1.1.-) (PME-1) - Mus musculus (Mouse)                                                                                                                                                                          |
| Q9Z176 | Protein phosphatase 2A, 59 kDa regulatory subunit B (PP2A PR59) (PP2A B~~-PR59) - Mus                                                                                                                                                                     |
| Q8VHR5 | Transcriptional repressor p66 beta (p66/p68) (GATA zinc finger domain-containing protein 2B) - Mus                                                                                                                                                        |
| Q00519 | Xanthine dehydrogenase/oxidase [Includes: Xanthine dehydrogenase (EC 1.17.1.4) (XD); Xanthine oxidase (EC 1.17.3.2) (XO) (Xanthine oxidoreductase)] - Mus musculus (Mouse)                                                                                |
| Q8BGT9 | Polypeptide N-acetylgalactosaminyltransferase 12 (EC 2.4.1.41) (Protein-UDP acetylgalactosaminyltransferase 12) (UDP-GalNAc:polypeptide N-acetylgalactosaminyltransferase 12) (Polypeptide GalNAc transferase 12) (GalNAc-T12) (pp-GaNTase 12) - Mus musc |
| Q921Q7 | Ras and Rab interactor 1 (Ras interaction/interference protein 1) - Mus musculus (Mouse)                                                                                                                                                                  |

|        |                                                                                                                                                                                                |
|--------|------------------------------------------------------------------------------------------------------------------------------------------------------------------------------------------------|
| Q6XUX1 | Receptor-interacting serine/threonine-protein kinase 5 (EC 2.7.11.1) (Dusty protein kinase) (Dusty                                                                                             |
| Q923A2 | Coiled-coil domain-containing protein 99 - Mus musculus (Mouse)                                                                                                                                |
| P50518 | Vacuolar ATP synthase subunit E (EC 3.6.3.14) (V-ATPase E subunit) (Vacuolar proton pump E subunit) (V-ATPase 31 kDa subunit) (P31) - Mus musculus (Mouse)                                     |
| P53351 | Serine/threonine-protein kinase PLK2 (EC 2.7.11.21) (Polo-like kinase 1) (PLK-2) (Serine/threonine-protein kinase SNK) (Serum-inducible kinase) - Mus musculus (Mouse)                         |
| Q9WU62 | Inner centromere protein - Mus musculus (Mouse)                                                                                                                                                |
| P0C1Q2 | Dual 3~,5~-cyclic-AMP and -GMP phosphodiesterase 11A (EC 3.1.4.17) (EC 3.1.4.35) (cAMP and cGMP phosphodiesterase 11A) - Mus musculus (Mouse)                                                  |
| Q8BZN6 | Dedicator of cytokinesis protein 10 - Mus musculus (Mouse)                                                                                                                                     |
| Q8K1J6 | tRNA-nucleotidyltransferase 1, mitochondrial precursor (EC 2.7.7.25) (mitochondrial tRNA nucleotidyl transferase, CCA-adding) (mt tRNA adenyllyltransferase) (mt tRNA CCA-                     |
| Q8R1A4 | Dedicator of cytokinesis protein 7 - Mus musculus (Mouse)                                                                                                                                      |
| P54276 | DNA mismatch repair protein MSH6 (MutS-alpha 160 kDa subunit) (G/T mismatch-binding protein) (GTBP) (GTMBP) (p160) - Mus musculus (Mouse)                                                      |
| Q7TPM1 | Uncharacterized protein KIAA0515 - Mus musculus (Mouse)                                                                                                                                        |
| O35464 | Semaphorin-6A precursor (Semaphorin VIA) (Sema VIA) (Semaphorin 6A-1) (SEMA6A-1) (Semaphorin Q) (Sema Q) - Mus musculus (Mouse)                                                                |
| Q8CI51 | PDZ and LIM domain protein 5 (Enigma homolog) (Enigma-like PDZ and LIM domains protein) - Mus                                                                                                  |
| Q99PJ1 | Protocadherin-15 precursor - Mus musculus (Mouse)                                                                                                                                              |
| Q80ZX8 | Sperm-associated antigen 1 (Infertility-related sperm protein Spag-1) (TPR-containing protein involved in spermatogenesis) (TPIS) - Mus musculus (Mouse)                                       |
| P39054 | Dynamamin-2 (EC 3.6.5.5) (Dynamamin UDNM) - Mus musculus (Mouse)                                                                                                                               |
| Q9QZ41 | Protein DBF4 homolog (MuDBF4) - Mus musculus (Mouse)                                                                                                                                           |
| Q8BX17 | Gem-associated protein 5 (Gemin5) - Mus musculus (Mouse)                                                                                                                                       |
| Q9EQ61 | Pescadillo homolog 1 - Mus musculus (Mouse)                                                                                                                                                    |
| Q9JKY5 | Huntingtin-interacting protein 1-related protein (Hip1-related) - Mus musculus (Mouse)                                                                                                         |
| Q8C3Y4 | Kinetochores-associated protein 1 - Mus musculus (Mouse)                                                                                                                                       |
| Q8BIJ7 | RUN and FYVE domain-containing protein 1 (Rab4-interacting protein) - Mus musculus (Mouse)                                                                                                     |
| Q9JJG0 | Transforming acidic coiled-coil-containing protein 2 - Mus musculus (Mouse)                                                                                                                    |
| Q9D415 | Disks large-associated protein 1 (DAP-1) (Guanylate kinase-associated protein) (SAP90/PSD-95-associated protein 1) (SAPAP1) (PSD-95/SAP90-binding protein 1) - Mus musculus (Mouse)            |
| Q6PDI5 | Proteasome-associated protein ECM29 homolog (Ecm29) - Mus musculus (Mouse)                                                                                                                     |
| Q7TSY8 | Shugoshin-like 2 - Mus musculus (Mouse)                                                                                                                                                        |
| Q80SW1 | Putative adenosylhomocysteinase 2 (EC 3.3.1.1) (S-adenosyl-L-homocysteine hydrolase 2) (AdoHcyase 2) (S-adenosylhomocysteine hydrolase-like 1) (IP3R-binding protein released with             |
| P19246 | Neurofilament triplet H protein (200 kDa neurofilament protein) (Neurofilament heavy polypeptide)                                                                                              |
| P62192 | 26S protease regulatory subunit 4 (P26s4) (Proteasome 26S subunit ATPase 1) - Mus musculus                                                                                                     |
| Q8K389 | CDK5 regulatory subunit-associated protein 2 (CDK5 activator-binding protein C48) - Mus musculus                                                                                               |
| P50446 | Keratin, type II cytoskeletal 6A (Cytokeratin-6A) (CK 6A) (K6a keratin) (Keratin-6 alpha) (mK6-alpha)                                                                                          |
| Q9JL70 | Fanconi anemia group A protein homolog (Protein FACA) - Mus musculus (Mouse)                                                                                                                   |
| O54988 | STE20-like serine/threonine-protein kinase (EC 2.7.11.1) (STE20-like kinase) (STE20-related serine/threonine-protein kinase) (STE20-related kinase) (mSLK) (Serine/threonine-protein kinase 2) |
| O88207 | Collagen alpha-1(V) chain precursor - Mus musculus (Mouse)                                                                                                                                     |
| Q8K0Q5 | Rho GTPase-activating protein 18 - Mus musculus (Mouse)                                                                                                                                        |
| Q60824 | Bullous pemphigoid antigen 1, isoforms 6/7 (BPA) (Hemidesmosomal plaque protein) (Dystonia musculorum protein) (Dystonin) (Fragments) - Mus musculus (Mouse)                                   |
| P68433 | Histone H3.1 - Mus musculus (Mouse)                                                                                                                                                            |
| P84244 | Histone H3.3 - Mus musculus (Mouse)                                                                                                                                                            |
| Q68FL4 | Putative adenosylhomocysteinase 3 (EC 3.3.1.1) (S-adenosyl-L-homocysteine hydrolase 3)                                                                                                         |
| Q6ZQ93 | Ubiquitin carboxyl-terminal hydrolase 34 (EC 3.1.2.15) (Ubiquitin thioesterase 34) (Ubiquitin-specific-processing protease 34) (Deubiquitinating enzyme 34) - Mus musculus (Mouse)             |

|        |                                                                                                                                               |
|--------|-----------------------------------------------------------------------------------------------------------------------------------------------|
| Q64525 | Histone H2B type 2-B (H2b 616) - Mus musculus (Mouse)                                                                                         |
| Q9R269 | Periplakin - Mus musculus (Mouse)                                                                                                             |
| Q91ZU8 | Bullous pemphigoid antigen 1, isoform 5 (BPA) (Hemidesmosomal plaque protein) (Dystonia musculorum protein) (Dystonin) - Mus musculus (Mouse) |
| P05213 | Tubulin alpha-2 chain (Alpha-tubulin 2) (Alpha-tubulin isotype M-alpha-2) - Mus musculus (Mouse)                                              |
| P05216 | Tubulin alpha-6 chain (Alpha-tubulin 6) (Alpha-tubulin isotype M-alpha-6) - Mus musculus (Mouse)                                              |
| Q9QXZ0 | Microtubule-actin cross-linking factor 1 (Actin cross-linking family 7) - Mus musculus (Mouse)                                                |
| Q9D2M8 | Ubiquitin-conjugating enzyme E2 variant 2 (Ubc-like protein MMS2) - Mus musculus (Mouse)                                                      |
