# Supplementary material
Source: PubMed Central journal article supplement (PMC2818196)
Supplement: supp_123_4_586__4.pdf [file supp_123_4_586__4.pdf]

| Table S4. List of proteins that are higher in Dicer-deficient NSCs. |                                                                                                                                                                       |                                                             |                          |               |               |                 |                 |
|---------------------------------------------------------------------|-----------------------------------------------------------------------------------------------------------------------------------------------------------------------|-------------------------------------------------------------|--------------------------|---------------|---------------|-----------------|-----------------|
| Enriched Biological Processes by Gene Ontology                      |                                                                                                                                                                       |                                                             |                          |               |               |                 |                 |
| Term                                                                | Accession                                                                                                                                                             | Protein names                                               | Genes                    | prot_score_WT | prot_score_KO | prot_matches_WT | prot_matches_KO |
| small GTPase mediated signal transduction                           | O35963                                                                                                                                                                | Ras-related protein Rab-33B                                 | Rab33b                   | 0             | 53            | 0               | 1               |
|                                                                     | Q91V41                                                                                                                                                                | Ras-related protein Rab-14                                  | Rab14                    | 0             | 53            | 0               | 2               |
|                                                                     | Q9JKM7                                                                                                                                                                | Ras-related protein Rab-37                                  | Rab37                    | 0             | 53            | 0               | 2               |
|                                                                     | P62823                                                                                                                                                                | Ras-related protein Rab-3C                                  | Rab3c                    | 0             | 53            | 0               | 2               |
|                                                                     | P61027                                                                                                                                                                | Ras-related protein Rab-10                                  | Rab10                    | 0             | 82            | 0               | 3               |
|                                                                     | Q504M8                                                                                                                                                                | Ras-related protein Rab-26                                  | Rab26                    | 0             | 53            | 0               | 3               |
|                                                                     | P63011                                                                                                                                                                | Ras-related protein Rab-3A                                  | Rab3a                    | 0             | 53            | 0               | 3               |
|                                                                     | Q9CZT8                                                                                                                                                                | Ras-related protein Rab-3B                                  | Rab3b                    | 0             | 53            | 0               | 3               |
|                                                                     | P62746                                                                                                                                                                | Rho-related GTP-binding protein RhoB                        | Rhob (Arhb)              | 0             | 82            | 0               | 3               |
|                                                                     | Q923S9                                                                                                                                                                | Ras-related protein Rab-30                                  | Rab30 (Rsb30)            | 0             | 53            | 0               | 4               |
|                                                                     | Q8CG50                                                                                                                                                                | Ras-related protein Rab-43                                  | Rab43                    | 0             | 53            | 0               | 4               |
|                                                                     | P46638                                                                                                                                                                | Ras-related protein Rab-11B                                 | Rab11b                   | 0             | 49            | 0               | 4               |
|                                                                     | Q8BHD0                                                                                                                                                                | Ras-related protein Rab-39A (Rab-39)                        | Rab39 (Rab39a)           | 0             | 53            | 0               | 4               |
|                                                                     | Q8BHC1                                                                                                                                                                | Ras-related protein Rab-39B                                 | Rab39b                   | 0             | 53            | 0               | 5               |
|                                                                     | Q9D1G1                                                                                                                                                                | Ras-related protein Rab-1B                                  | Rab1b                    | 0             | 91            | 0               | 8               |
|                                                                     | P35279                                                                                                                                                                | Ras-related protein Rab-6A (Rab-6)                          | Rab6a (Rab6) (MNCb-1660) | 0             | 76            | 0               | 9               |
|                                                                     | Q8BSL7                                                                                                                                                                | ADP-ribosylation factor 2                                   | Arf2                     | 0             | 270           | 0               | 10              |
|                                                                     | P35283                                                                                                                                                                | Ras-related protein Rab-12 (Rab-13)                         | Rab12                    | 0             | 53            | 0               | 11              |
|                                                                     | P35276                                                                                                                                                                | Ras-related protein Rab-3D                                  | Rab3d                    | 0             | 53            | 0               | 11              |
|                                                                     | Q99MK9                                                                                                                                                                | Ras association domain-containing protein 1 (Protein 123F2) | Rassf1                   | 0             | 29            | 0               | 11              |
| Q60875                                                              | Rho guanine nucleotide exchange factor 2 (Guanine nucleotide exchange factor H1) (GEF-H1) (Lymphoid blast crisis-like 1) (LBC'S first cousin) (Oncogene LFC) (Rhobin) | Arhgef2 (Kiaa0651) (Lbcl1) (Lfc)                            | 0                        | 31            | 0             | 12              |                 |

|                         |        |                                                                                                                                                                  |                           |    |     |    |    |
|-------------------------|--------|------------------------------------------------------------------------------------------------------------------------------------------------------------------|---------------------------|----|-----|----|----|
|                         | Q8BPU7 | Engulfment and cell motility protein 1 (CED-12 homolog)                                                                                                          | Elmo1                     | 0  | 64  | 0  | 12 |
|                         | P14685 | 26S proteasome non-ATPase regulatory subunit 3 (26S proteasome regulatory subunit S3) (Proteasome subunit p58) (Transplantation antigen P91A) (Tum-P91A antigen) | Psmd3 (P91a) (Tstap91a)   | 0  | 25  | 0  | 12 |
|                         | P84084 | ADP-ribosylation factor 5                                                                                                                                        | Arf5                      | 0  | 210 | 0  | 13 |
|                         | Q80TE4 | Signal-induced proliferation-associated 1-like protein 2 (SIPA1-like protein 2)                                                                                  | Sipa1l2 (Kiaa0545)        | 0  | 36  | 0  | 16 |
|                         | Q3UTH8 | Rho guanine nucleotide exchange factor 9 (Rac/Cdc42 guanine nucleotide exchange factor 9) (Collybistin)                                                          | Arhgef9 (Kiaa0424)        | 0  | 31  | 0  | 17 |
|                         | P61750 | ADP-ribosylation factor 4                                                                                                                                        | Arf4                      | 21 | 56  | 2  | 8  |
|                         | P35278 | Ras-related protein Rab-5C                                                                                                                                       | Rab5c                     | 60 | 79  | 4  | 12 |
|                         | P61205 | ADP-ribosylation factor 3                                                                                                                                        | Arf3                      | 32 | 423 | 6  | 17 |
|                         | Q61037 | Tuberin (Tuberous sclerosis 2 homolog protein)                                                                                                                   | Tsc2                      | 22 | 46  | 38 | 91 |
| regulation of transport | P62823 | Ras-related protein Rab-3C                                                                                                                                       | Rab3c                     | 0  | 53  | 0  | 2  |
|                         | Q504M8 | Ras-related protein Rab-26                                                                                                                                       | Rab26                     | 0  | 53  | 0  | 3  |
|                         | P63011 | Ras-related protein Rab-3A                                                                                                                                       | Rab3a                     | 0  | 53  | 0  | 3  |
|                         | Q9CZT8 | Ras-related protein Rab-3B                                                                                                                                       | Rab3b                     | 0  | 53  | 0  | 3  |
|                         | Q62048 | Astrocytic phosphoprotein PEA-15                                                                                                                                 | Pea15 (Pea15a)            | 0  | 38  | 0  | 4  |
|                         | Q8BWG9 | Calcium release-activated calcium channel protein 1 (Protein orai-1) (Transmembrane protein 142A)                                                                | Orai1 (Cracm1) (Tmem142a) | 0  | 33  | 0  | 5  |
|                         | P57780 | Alpha-actinin-4 (Non-muscle alpha-actinin 4) (F-actin cross-linking protein)                                                                                     | Actn4                     | 0  | 34  | 0  | 10 |
|                         | P35276 | Ras-related protein Rab-3D                                                                                                                                       | Rab3d                     | 0  | 53  | 0  | 11 |
|                         | P35235 | Tyrosine-protein phosphatase non-receptor type 11 (EC 3.1.3.48) (Protein-tyrosine phosphatase SYP) (SH-PTP2) (SHP-2) (Shp2)                                      | Ptpn11                    | 0  | 40  | 0  | 12 |

|                     |        |                                                                                                                                                                                                                                          |                   |    |    |    |    |
|---------------------|--------|------------------------------------------------------------------------------------------------------------------------------------------------------------------------------------------------------------------------------------------|-------------------|----|----|----|----|
|                     | O08532 | Voltage-dependent calcium channel subunit alpha-2/delta-1 (Voltage-gated calcium channel subunit alpha-2/delta-1) [Cleaved into: Voltage-dependent calcium channel subunit alpha-2-1; Voltage-dependent calcium channel subunit delta-1] | Cacna2d1 (Cacna2) | 0  | 25 | 0  | 26 |
|                     | P35278 | Ras-related protein Rab-5C                                                                                                                                                                                                               | Rab5c             | 60 | 79 | 4  | 12 |
|                     | Q61037 | Tuberin (Tuberous sclerosis 2 homolog protein)                                                                                                                                                                                           | Tsc2              | 22 | 46 | 38 | 91 |
| signal transduction | O35963 | Ras-related protein Rab-33B                                                                                                                                                                                                              | Rab33b            | 0  | 53 | 0  | 1  |
|                     | Q91V41 | Ras-related protein Rab-14                                                                                                                                                                                                               | Rab14             | 0  | 53 | 0  | 2  |
|                     | Q9JKM7 | Ras-related protein Rab-37                                                                                                                                                                                                               | Rab37             | 0  | 53 | 0  | 2  |
|                     | P62823 | Ras-related protein Rab-3C                                                                                                                                                                                                               | Rab3c             | 0  | 53 | 0  | 2  |
|                     | Q91WW3 | Mas-related G-protein coupled receptor member A3                                                                                                                                                                                         | Mrgpra3 (Mrga3)   | 0  | 26 | 0  | 3  |
|                     | P61027 | Ras-related protein Rab-10                                                                                                                                                                                                               | Rab10             | 0  | 82 | 0  | 3  |
|                     | Q504M8 | Ras-related protein Rab-26                                                                                                                                                                                                               | Rab26             | 0  | 53 | 0  | 3  |
|                     | P63011 | Ras-related protein Rab-3A                                                                                                                                                                                                               | Rab3a             | 0  | 53 | 0  | 3  |
|                     | Q9CZT8 | Ras-related protein Rab-3B                                                                                                                                                                                                               | Rab3b             | 0  | 53 | 0  | 3  |
|                     | P62746 | Rho-related GTP-binding protein RhoB                                                                                                                                                                                                     | Rhob (Arhb)       | 0  | 82 | 0  | 3  |
|                     | Q62048 | Astrocytic phosphoprotein PEA-15                                                                                                                                                                                                         | Pea15 (Pea15a)    | 0  | 38 | 0  | 4  |
|                     | Q923S9 | Ras-related protein Rab-30                                                                                                                                                                                                               | Rab30 (Rsb30)     | 0  | 53 | 0  | 4  |
|                     | Q8CG50 | Ras-related protein Rab-43                                                                                                                                                                                                               | Rab43             | 0  | 53 | 0  | 4  |
|                     | P46638 | Ras-related protein Rab-11B                                                                                                                                                                                                              | Rab11b            | 0  | 49 | 0  | 4  |
|                     | Q8BHD0 | Ras-related protein Rab-39A (Rab-39)                                                                                                                                                                                                     | Rab39 (Rab39a)    | 0  | 53 | 0  | 4  |
|                     | Q62252 | Sperm surface protein Sp17 (Sperm autoantigenic protein 17)                                                                                                                                                                              | Spa17 (Sp17)      | 0  | 29 | 0  | 4  |
|                     | P70677 | Caspase-3 (CASP-3) (EC 3.4.22.56) (Apopain) (Cysteine protease CPP32) (CPP-32) (Yama protein) (SREBP cleavage activity 1) (SCA-1) (LICE) [Cleaved into: Caspase-3 subunit p17; Caspase-3 subunit p12]                                    | Casp3 (Cp32)      | 0  | 29 | 0  | 5  |
|                     | Q8BHC1 | Ras-related protein Rab-39B                                                                                                                                                                                                              | Rab39b            | 0  | 53 | 0  | 5  |

|        |                                                                                                                                                                              |                             |   |     |   |    |
|--------|------------------------------------------------------------------------------------------------------------------------------------------------------------------------------|-----------------------------|---|-----|---|----|
| Q99K90 | Mitogen-activated protein kinase kinase kinase 7-interacting protein 2 (TAK1-binding protein 2) (TAB2)                                                                       | Map3k7ip2 (Kiaa0733) (Tab2) | 0 | 25  | 0 | 5  |
| P10107 | Annexin A1 (Annexin-1) (Annexin I) (Lipocortin I) (Calpactin II) (Chromobindin-9) (p35) (Phospholipase A2 inhibitory protein)                                                | Anxa1 (Anx1) (Lpc-1) (Lpc1) | 0 | 26  | 0 | 6  |
| Q9Z2Y3 | Homer protein homolog 1 (VASP/Ena-related gene up-regulated during seizure and LTP) (Vesl-1)                                                                                 | Homer1 (Vesl1)              | 0 | 30  | 0 | 6  |
| P27612 | Phospholipase A-2-activating protein (PLAP)                                                                                                                                  | Plaa (Plap)                 | 0 | 27  | 0 | 6  |
| P63330 | Serine/threonine-protein phosphatase 2A catalytic subunit alpha isoform (PP2A-alpha) (EC 3.1.3.16)                                                                           | Ppp2ca                      | 0 | 101 | 0 | 6  |
| Q9ERZ4 | Muscarinic acetylcholine receptor M2                                                                                                                                         | Chrm2 (Chrm-2)              | 0 | 31  | 0 | 8  |
| Q9D1G1 | Ras-related protein Rab-1B                                                                                                                                                   | Rab1b                       | 0 | 91  | 0 | 8  |
| O88907 | E3 SUMO-protein ligase PIAS1 (Protein inhibitor of activated STAT protein 1) (DEAD/H box-binding protein 1)                                                                  | Pias1 (Ddxbp1)              | 0 | 31  | 0 | 9  |
| Q8BWW9 | Serine/threonine-protein kinase N2 (EC 2.7.11.13) (Protein kinase C-like 2) (Protein-kinase C-related kinase 2)                                                              | Pkn2 (Prkcl2)               | 0 | 25  | 0 | 9  |
| P35279 | Ras-related protein Rab-6A (Rab-6)                                                                                                                                           | Rab6a (Rab6) (MNCb-1660)    | 0 | 76  | 0 | 9  |
| Q8BSL7 | ADP-ribosylation factor 2                                                                                                                                                    | Arf2                        | 0 | 270 | 0 | 10 |
| P36898 | Bone morphogenetic protein receptor type-1B (EC 2.7.11.30) (Serine/threonine-protein kinase receptor R6) (SKR6) (Activin receptor-like kinase 6) (ALK-6) (CD antigen CDw293) | Bmpr1b (Acvrlk6)            | 0 | 26  | 0 | 10 |
| P35283 | Ras-related protein Rab-12 (Rab-13)                                                                                                                                          | Rab12                       | 0 | 53  | 0 | 11 |
| P35276 | Ras-related protein Rab-3D                                                                                                                                                   | Rab3d                       | 0 | 53  | 0 | 11 |

|        |                                                                                                                                                                                                                                            |                                  |   |     |   |    |
|--------|--------------------------------------------------------------------------------------------------------------------------------------------------------------------------------------------------------------------------------------------|----------------------------------|---|-----|---|----|
| Q99MK9 | Ras association domain-containing protein 1 (Protein 123F2)                                                                                                                                                                                | Rassf1                           | 0 | 29  | 0 | 11 |
| P35917 | Vascular endothelial growth factor receptor 3 (VEGFR-3) (EC 2.7.10.1) (Tyrosine-protein kinase receptor FLT4)                                                                                                                              | Flt4 (Flt-4)                     | 0 | 34  | 0 | 11 |
| Q60875 | Rho guanine nucleotide exchange factor 2 (Guanine nucleotide exchange factor H1) (GEF-H1) (Lymphoid blast crisis-like 1) (LBC'S first cousin) (Oncogene LFC) (Rhobin)                                                                      | Arhgef2 (Kiaa0651) (Lbcl1) (Lfc) | 0 | 31  | 0 | 12 |
| Q8BPU7 | Engulfment and cell motility protein 1 (CED-12 homolog)                                                                                                                                                                                    | Elmo1                            | 0 | 64  | 0 | 12 |
| Q8CG03 | cGMP-specific 3',5'-cyclic phosphodiesterase (EC 3.1.4.35) (cGMP-binding cGMP-specific phosphodiesterase) (CGB-PDE)                                                                                                                        | Pde5a (Pde5)                     | 0 | 65  | 0 | 12 |
| P14685 | 26S proteasome non-ATPase regulatory subunit 3 (26S proteasome regulatory subunit S3) (Proteasome subunit p58) (Transplantation antigen P91A) (Tum-P91A antigen)                                                                           | Psmc3 (P91a) (Tstap91a)          | 0 | 25  | 0 | 12 |
| P35235 | Tyrosine-protein phosphatase non-receptor type 11 (EC 3.1.3.48) (Protein-tyrosine phosphatase SYP) (SH-PTP2) (SHP-2) (Shp2)                                                                                                                | Ptpn11                           | 0 | 40  | 0 | 12 |
| P84084 | ADP-ribosylation factor 5                                                                                                                                                                                                                  | Arf5                             | 0 | 210 | 0 | 13 |
| Q63844 | Mitogen-activated protein kinase 3 (EC 2.7.11.24) (Extracellular signal-regulated kinase 1) (ERK-1) (Insulin-stimulated MAP2 kinase) (MAP kinase 1) (MAPK 1) (p44-ERK1) (ERT2) (p44-MAPK) (Microtubule-associated protein 2 kinase) (MNK1) | Mapk3 (Erk1) (Prkm3)             | 0 | 37  | 0 | 14 |
| P35438 | Glutamate [NMDA] receptor subunit zeta-1 (N-methyl-D-aspartate receptor subunit NR1)                                                                                                                                                       | Grin1 (Glurz1)                   | 0 | 27  | 0 | 15 |
| P05622 | Beta-type platelet-derived growth factor receptor (EC 2.7.10.1) (PDGF-R-beta) (CD140 antigen-like family member B) (CD antigen CD140b)                                                                                                     | Pdgfrb (Pdgfr)                   | 0 | 34  | 0 | 16 |
| Q80TE4 | Signal-induced proliferation-associated 1-like protein 2 (SIPA1-like protein 2)                                                                                                                                                            | Sipa1l2 (Kiaa0545)               | 0 | 36  | 0 | 16 |

|        |                                                                                                                                                                                    |                                  |    |     |    |    |
|--------|------------------------------------------------------------------------------------------------------------------------------------------------------------------------------------|----------------------------------|----|-----|----|----|
| P35918 | Vascular endothelial growth factor receptor 2 (VEGFR-2) (EC 2.7.10.1) (Protein-tyrosine kinase receptor flk-1) (Fetal liver kinase 1) (Kinase NYK) (CD antigen CD309)              | Kdr (Flk-1) (Flk1)               | 0  | 34  | 0  | 16 |
| Q3UTH8 | Rho guanine nucleotide exchange factor 9 (Rac/Cdc42 guanine nucleotide exchange factor 9) (Collybistin)                                                                            | Arhgef9 (Kiaa0424)               | 0  | 31  | 0  | 17 |
| Q62383 | Transcription elongation factor SPT6                                                                                                                                               | Supt6h (Kiaa0162)                | 0  | 28  | 0  | 17 |
| P83510 | Traf2 and NCK-interacting protein kinase (EC 2.7.11.1)                                                                                                                             | Tnik (Kiaa0551)                  | 0  | 54  | 0  | 17 |
| P63085 | Mitogen-activated protein kinase 1 (EC 2.7.11.24) (Extracellular signal-regulated kinase 2) (ERK-2) (Mitogen-activated protein kinase 2) (MAP kinase 2) (MAPK 2) (p42-MAPK) (ERT1) | Mapk1 (Erk2) (Mapk) (Prkm1)      | 0  | 112 | 0  | 19 |
| Q80U72 | Protein LAP4 (Protein scribble homolog)                                                                                                                                            | Scrib (Kiaa0147) (Lap4) (Scrib1) | 0  | 29  | 0  | 22 |
| P61750 | ADP-ribosylation factor 4                                                                                                                                                          | Arf4                             | 21 | 56  | 2  | 8  |
| P35278 | Ras-related protein Rab-5C                                                                                                                                                         | Rab5c                            | 60 | 79  | 4  | 12 |
| P61205 | ADP-ribosylation factor 3                                                                                                                                                          | Arf3                             | 32 | 423 | 6  | 17 |
| Q7SIG6 | Development and differentiation-enhancing factor 2 (Pyk2 C-terminus-associated protein) (PAP) (Paxillin-associated protein with ARFGAP activity 3) (PAG3)                          | Ddef2 (Gm1523) (Gm592)           | 36 | 43  | 7  | 17 |
| Q61037 | Tuberin (Tuberous sclerosis 2 homolog protein)                                                                                                                                     | Tsc2                             | 22 | 46  | 38 | 91 |
| P11679 | Keratin, type II cytoskeletal 8 (Cytokeratin-8) (CK-8) (Keratin-8) (K8) (Cytokeratin endo A)                                                                                       | Krt8 (Krt2-8)                    | 61 | 175 | 13 | 29 |
| Q80YX1 | Tenascin (TN) (Tenascin-C) (TN-C) (Hexabrachion)                                                                                                                                   | Tnc (Hxb)                        | 80 | 200 | 22 | 45 |
| P12815 | Programmed cell death protein 6 (Probable calcium-binding protein ALG-2) (PMP41) (ALG-257)                                                                                         | Pdcd6 (Alg2)                     | 42 | 19  | 1  | 2  |

|                                 |                                                                                                    |                                                                                                                                                                                                       |                             |     |    |   |   |
|---------------------------------|----------------------------------------------------------------------------------------------------|-------------------------------------------------------------------------------------------------------------------------------------------------------------------------------------------------------|-----------------------------|-----|----|---|---|
|                                 | Q61481                                                                                             | Calcium/calmodulin-dependent 3',5'-cyclic nucleotide phosphodiesterase 1A (Cam-PDE 1A) (EC 3.1.4.17) (61 kDa Cam-PDE)                                                                                 | Pde1a                       | 21  | 30 | 3 | 6 |
| intracellular signaling cascade | Q35963                                                                                             | Ras-related protein Rab-33B                                                                                                                                                                           | Rab33b                      | 0   | 53 | 0 | 1 |
|                                 | Q91V41                                                                                             | Ras-related protein Rab-14                                                                                                                                                                            | Rab14                       | 0   | 53 | 0 | 2 |
|                                 | Q9JKM7                                                                                             | Ras-related protein Rab-37                                                                                                                                                                            | Rab37                       | 0   | 53 | 0 | 2 |
|                                 | P62823                                                                                             | Ras-related protein Rab-3C                                                                                                                                                                            | Rab3c                       | 0   | 53 | 0 | 2 |
|                                 | P61027                                                                                             | Ras-related protein Rab-10                                                                                                                                                                            | Rab10                       | 0   | 82 | 0 | 3 |
|                                 | Q504M8                                                                                             | Ras-related protein Rab-26                                                                                                                                                                            | Rab26                       | 0   | 53 | 0 | 3 |
|                                 | P63011                                                                                             | Ras-related protein Rab-3A                                                                                                                                                                            | Rab3a                       | 0   | 53 | 0 | 3 |
|                                 | Q9CZT8                                                                                             | Ras-related protein Rab-3B                                                                                                                                                                            | Rab3b                       | 0   | 53 | 0 | 3 |
|                                 | P62746                                                                                             | Rho-related GTP-binding protein RhoB                                                                                                                                                                  | Rhob (Arhb)                 | 0   | 82 | 0 | 3 |
|                                 | Q62048                                                                                             | Astrocytic phosphoprotein PEA-15                                                                                                                                                                      | Pea15 (Pea15a)              | 0   | 38 | 0 | 4 |
|                                 | Q923S9                                                                                             | Ras-related protein Rab-30                                                                                                                                                                            | Rab30 (Rsb30)               | 0   | 53 | 0 | 4 |
|                                 | Q8CG50                                                                                             | Ras-related protein Rab-43                                                                                                                                                                            | Rab43                       | 0   | 53 | 0 | 4 |
|                                 | P46638                                                                                             | Ras-related protein Rab-11B                                                                                                                                                                           | Rab11b                      | 0   | 49 | 0 | 4 |
|                                 | Q8BHD0                                                                                             | Ras-related protein Rab-39A (Rab-39)                                                                                                                                                                  | Rab39 (Rab39a)              | 0   | 53 | 0 | 4 |
|                                 | P70677                                                                                             | Caspase-3 (CASP-3) (EC 3.4.22.56) (Apopain) (Cysteine protease CPP32) (CPP-32) (Yama protein) (SREBP cleavage activity 1) (SCA-1) (LICE) [Cleaved into: Caspase-3 subunit p17; Caspase-3 subunit p12] | Casp3 (Cp32)                | 0   | 29 | 0 | 5 |
|                                 | Q8BHC1                                                                                             | Ras-related protein Rab-39B                                                                                                                                                                           | Rab39b                      | 0   | 53 | 0 | 5 |
|                                 | Q99K90                                                                                             | Mitogen-activated protein kinase kinase kinase 7-interacting protein 2 (TAK1-binding protein 2) (TAB2)                                                                                                | Map3k7ip2 (Kiaa0733) (Tab2) | 0   | 25 | 0 | 5 |
| P63330                          | Serine/threonine-protein phosphatase 2A catalytic subunit alpha isoform (PP2A-alpha) (EC 3.1.3.16) | Ppp2ca                                                                                                                                                                                                | 0                           | 101 | 0  | 6 |   |
| Q9D1G1                          | Ras-related protein Rab-1B                                                                         | Rab1b                                                                                                                                                                                                 | 0                           | 91  | 0  | 8 |   |

|        |                                                                                                                                                                       |                                  |   |     |   |    |
|--------|-----------------------------------------------------------------------------------------------------------------------------------------------------------------------|----------------------------------|---|-----|---|----|
| O88907 | E3 SUMO-protein ligase PIAS1 (Protein inhibitor of activated STAT protein 1) (DEAD/H box-binding protein 1)                                                           | Pias1 (Ddxbp1)                   | 0 | 31  | 0 | 9  |
| P35279 | Ras-related protein Rab-6A (Rab-6)                                                                                                                                    | Rab6a (Rab6) (MNCb-1660)         | 0 | 76  | 0 | 9  |
| Q8BSL7 | ADP-ribosylation factor 2                                                                                                                                             | Arf2                             | 0 | 270 | 0 | 10 |
| P35283 | Ras-related protein Rab-12 (Rab-13)                                                                                                                                   | Rab12                            | 0 | 53  | 0 | 11 |
| P35276 | Ras-related protein Rab-3D                                                                                                                                            | Rab3d                            | 0 | 53  | 0 | 11 |
| Q99MK9 | Ras association domain-containing protein 1 (Protein 123F2)                                                                                                           | Rassf1                           | 0 | 29  | 0 | 11 |
| Q60875 | Rho guanine nucleotide exchange factor 2 (Guanine nucleotide exchange factor H1) (GEF-H1) (Lymphoid blast crisis-like 1) (LBC'S first cousin) (Oncogene LFC) (Rhobin) | Arhgef2 (Kiaa0651) (Lbcl1) (Lfc) | 0 | 31  | 0 | 12 |
| Q8BPU7 | Engulfment and cell motility protein 1 (CED-12 homolog)                                                                                                               | Elmo1                            | 0 | 64  | 0 | 12 |
| P14685 | 26S proteasome non-ATPase regulatory subunit 3 (26S proteasome regulatory subunit S3) (Proteasome subunit p58) (Transplantation antigen P91A) (Tum-P91A antigen)      | Psmc3 (P91a) (Tstap91a)          | 0 | 25  | 0 | 12 |
| P35235 | Tyrosine-protein phosphatase non-receptor type 11 (EC 3.1.3.48) (Protein-tyrosine phosphatase SYP) (SH-PTP2) (SHP-2) (Shp2)                                           | Ptpn11                           | 0 | 40  | 0 | 12 |
| P84084 | ADP-ribosylation factor 5                                                                                                                                             | Arf5                             | 0 | 210 | 0 | 13 |
| Q80TE4 | Signal-induced proliferation-associated 1-like protein 2 (SIPA1-like protein 2)                                                                                       | Sipa1l2 (Kiaa0545)               | 0 | 36  | 0 | 16 |
| Q3UTH8 | Rho guanine nucleotide exchange factor 9 (Rac/Cdc42 guanine nucleotide exchange factor 9) (Collybistin)                                                               | Arhgef9 (Kiaa0424)               | 0 | 31  | 0 | 17 |
| Q62383 | Transcription elongation factor SPT6                                                                                                                                  | Supt6h (Kiaa0162)                | 0 | 28  | 0 | 17 |



|                    |        |                                                                                                                                                                                    |                                  |    |     |    |    |
|--------------------|--------|------------------------------------------------------------------------------------------------------------------------------------------------------------------------------------|----------------------------------|----|-----|----|----|
|                    | P83510 | Traf2 and NCK-interacting protein kinase (EC 2.7.11.1)                                                                                                                             | Tnik (Kiaa0551)                  | 0  | 54  | 0  | 17 |
|                    | P63085 | Mitogen-activated protein kinase 1 (EC 2.7.11.24) (Extracellular signal-regulated kinase 2) (ERK-2) (Mitogen-activated protein kinase 2) (MAP kinase 2) (MAPK 2) (p42-MAPK) (ERT1) | Mapk1 (Erk2) (Mapk) (Prkm1)      | 0  | 112 | 0  | 19 |
|                    | Q80U72 | Protein LAP4 (Protein scribble homolog)                                                                                                                                            | Scrib (Kiaa0147) (Lap4) (Scrib1) | 0  | 29  | 0  | 22 |
|                    | P61750 | ADP-ribosylation factor 4                                                                                                                                                          | Arf4                             | 21 | 56  | 2  | 8  |
|                    | P35278 | Ras-related protein Rab-5C                                                                                                                                                         | Rab5c                            | 60 | 79  | 4  | 12 |
|                    | P61205 | ADP-ribosylation factor 3                                                                                                                                                          | Arf3                             | 32 | 423 | 6  | 17 |
|                    | Q61037 | Tuberin (Tuberous sclerosis 2 homolog protein)                                                                                                                                     | Tsc2                             | 22 | 46  | 38 | 91 |
|                    | P12815 | Programmed cell death protein 6 (Probable calcium-binding protein ALG-2) (PMP41) (ALG-257)                                                                                         | Pdcd6 (Alg2)                     | 42 | 19  | 1  | 2  |
| cell communication | O35963 | Ras-related protein Rab-33B                                                                                                                                                        | Rab33b                           | 0  | 53  | 0  | 1  |
|                    | Q91V41 | Ras-related protein Rab-14                                                                                                                                                         | Rab14                            | 0  | 53  | 0  | 2  |
|                    | Q9JKM7 | Ras-related protein Rab-37                                                                                                                                                         | Rab37                            | 0  | 53  | 0  | 2  |
|                    | P62823 | Ras-related protein Rab-3C                                                                                                                                                         | Rab3c                            | 0  | 53  | 0  | 2  |
|                    | O70492 | Sorting nexin-3 (SDP3 protein)                                                                                                                                                     | Snx3                             | 0  | 54  | 0  | 2  |
|                    | Q91WW3 | Mas-related G-protein coupled receptor member A3                                                                                                                                   | Mrgpra3 (Mrga3)                  | 0  | 26  | 0  | 3  |
|                    | P61027 | Ras-related protein Rab-10                                                                                                                                                         | Rab10                            | 0  | 82  | 0  | 3  |
|                    | Q504M8 | Ras-related protein Rab-26                                                                                                                                                         | Rab26                            | 0  | 53  | 0  | 3  |
|                    | P63011 | Ras-related protein Rab-3A                                                                                                                                                         | Rab3a                            | 0  | 53  | 0  | 3  |
|                    | Q9CZT8 | Ras-related protein Rab-3B                                                                                                                                                         | Rab3b                            | 0  | 53  | 0  | 3  |
|                    | P62746 | Rho-related GTP-binding protein RhoB                                                                                                                                               | Rhob (Arhb)                      | 0  | 82  | 0  | 3  |
|                    | Q62048 | Astrocytic phosphoprotein PEA-15                                                                                                                                                   | Pea15 (Pea15a)                   | 0  | 38  | 0  | 4  |
|                    | Q923S9 | Ras-related protein Rab-30                                                                                                                                                         | Rab30 (Rsb30)                    | 0  | 53  | 0  | 4  |
|                    | Q8CG50 | Ras-related protein Rab-43                                                                                                                                                         | Rab43                            | 0  | 53  | 0  | 4  |

|        |                                                                                                                                                                                                       |                                       |   |     |   |   |
|--------|-------------------------------------------------------------------------------------------------------------------------------------------------------------------------------------------------------|---------------------------------------|---|-----|---|---|
| P46638 | Ras-related protein Rab-11B                                                                                                                                                                           | Rab11b                                | 0 | 49  | 0 | 4 |
| Q8BHD0 | Ras-related protein Rab-39A (Rab-39)                                                                                                                                                                  | Rab39<br>(Rab39a)                     | 0 | 53  | 0 | 4 |
| Q62252 | Sperm surface protein Sp17 (Sperm autoantigenic protein 17)                                                                                                                                           | Spa17<br>(Sp17)                       | 0 | 29  | 0 | 4 |
| P70677 | Caspase-3 (CASP-3) (EC 3.4.22.56) (Apopain) (Cysteine protease CPP32) (CPP-32) (Yama protein) (SREBP cleavage activity 1) (SCA-1) (LICE) [Cleaved into: Caspase-3 subunit p17; Caspase-3 subunit p12] | Casp3<br>(Cp32)                       | 0 | 29  | 0 | 5 |
| Q8BHC1 | Ras-related protein Rab-39B                                                                                                                                                                           | Rab39b                                | 0 | 53  | 0 | 5 |
| Q99K90 | Mitogen-activated protein kinase kinase kinase 7-interacting protein 2 (TAK1-binding protein 2) (TAB2)                                                                                                | Map3k7ip<br>2<br>(Kiaa0733)<br>(Tab2) | 0 | 25  | 0 | 5 |
| P10107 | Annexin A1 (Annexin-1) (Annexin I) (Lipocortin I) (Calpactin II) (Chromobindin-9) (p35) (Phospholipase A2 inhibitory protein)                                                                         | Anxa1<br>(Anx1)<br>(Lpc-1)<br>(Lpc1)  | 0 | 26  | 0 | 6 |
| Q9Z2Y3 | Homer protein homolog 1 (VASP/Ena-related gene up-regulated during seizure and LTP) (Vesl-1)                                                                                                          | Homer1<br>(Vesl1)                     | 0 | 30  | 0 | 6 |
| P27612 | Phospholipase A-2-activating protein (PLAP)                                                                                                                                                           | Plaa<br>(Plap)                        | 0 | 27  | 0 | 6 |
| P63330 | Serine/threonine-protein phosphatase 2A catalytic subunit alpha isoform (PP2A-alpha) (EC 3.1.3.16)                                                                                                    | Ppp2ca                                | 0 | 101 | 0 | 6 |
| Q9ERZ4 | Muscarinic acetylcholine receptor M2                                                                                                                                                                  | Chrm2<br>(Chrm-2)                     | 0 | 31  | 0 | 8 |
| Q9D1G1 | Ras-related protein Rab-1B                                                                                                                                                                            | Rab1b                                 | 0 | 91  | 0 | 8 |
| O88907 | E3 SUMO-protein ligase PIAS1 (Protein inhibitor of activated STAT protein 1) (DEAD/H box-binding protein 1)                                                                                           | Pias1<br>(Ddxbp1)                     | 0 | 31  | 0 | 9 |
| Q8BWW9 | Serine/threonine-protein kinase N2 (EC 2.7.11.13) (Protein kinase C-like 2) (Protein-kinase C-related kinase 2)                                                                                       | Pkn2<br>(Prkcl2)                      | 0 | 25  | 0 | 9 |

|        |                                                                                                                                                                              |                                           |   |     |   |    |
|--------|------------------------------------------------------------------------------------------------------------------------------------------------------------------------------|-------------------------------------------|---|-----|---|----|
| P35279 | Ras-related protein Rab-6A (Rab-6)                                                                                                                                           | Rab6a<br>(Rab6)<br>(MNCb-1660)            | 0 | 76  | 0 | 9  |
| Q8BSL7 | ADP-ribosylation factor 2                                                                                                                                                    | Arf2                                      | 0 | 270 | 0 | 10 |
| P36898 | Bone morphogenetic protein receptor type-1B (EC 2.7.11.30) (Serine/threonine-protein kinase receptor R6) (SKR6) (Activin receptor-like kinase 6) (ALK-6) (CD antigen CDw293) | Bmpr1b<br>(Acvrlk6)                       | 0 | 26  | 0 | 10 |
| P35283 | Ras-related protein Rab-12 (Rab-13)                                                                                                                                          | Rab12                                     | 0 | 53  | 0 | 11 |
| P35276 | Ras-related protein Rab-3D                                                                                                                                                   | Rab3d                                     | 0 | 53  | 0 | 11 |
| Q99MK9 | Ras association domain-containing protein 1 (Protein 123F2)                                                                                                                  | Rassf1                                    | 0 | 29  | 0 | 11 |
| P35917 | Vascular endothelial growth factor receptor 3 (VEGFR-3) (EC 2.7.10.1) (Tyrosine-protein kinase receptor FLT4)                                                                | Flt4 (Flt-4)                              | 0 | 34  | 0 | 11 |
| Q60875 | Rho guanine nucleotide exchange factor 2 (Guanine nucleotide exchange factor H1) (GEF-H1) (Lymphoid blast crisis-like 1) (LBC'S first cousin) (Oncogene LFC) (Rhobin)        | Arhgef2<br>(Kiaa0651)<br>(Lbcl1)<br>(Lfc) | 0 | 31  | 0 | 12 |
| Q8BPU7 | Engulfment and cell motility protein 1 (CED-12 homolog)                                                                                                                      | Elmo1                                     | 0 | 64  | 0 | 12 |
| Q8CG03 | cGMP-specific 3',5'-cyclic phosphodiesterase (EC 3.1.4.35) (cGMP-binding cGMP-specific phosphodiesterase) (CGB-PDE)                                                          | Pde5a<br>(Pde5)                           | 0 | 65  | 0 | 12 |
| P14685 | 26S proteasome non-ATPase regulatory subunit 3 (26S proteasome regulatory subunit S3) (Proteasome subunit p58) (Transplantation antigen P91A) (Tum-P91A antigen)             | Psm3<br>(P91a)<br>(Tstap91a)              | 0 | 25  | 0 | 12 |
| P35235 | Tyrosine-protein phosphatase non-receptor type 11 (EC 3.1.3.48) (Protein-tyrosine phosphatase SYP) (SH-PTP2) (SHP-2) (Shp2)                                                  | Ptpn11                                    | 0 | 40  | 0 | 12 |
| P84084 | ADP-ribosylation factor 5                                                                                                                                                    | Arf5                                      | 0 | 210 | 0 | 13 |

|        |                                                                                                                                                                                                                                            |                                  |    |     |   |    |
|--------|--------------------------------------------------------------------------------------------------------------------------------------------------------------------------------------------------------------------------------------------|----------------------------------|----|-----|---|----|
| Q63844 | Mitogen-activated protein kinase 3 (EC 2.7.11.24) (Extracellular signal-regulated kinase 1) (ERK-1) (Insulin-stimulated MAP2 kinase) (MAP kinase 1) (MAPK 1) (p44-ERK1) (ERT2) (p44-MAPK) (Microtubule-associated protein 2 kinase) (MNK1) | Mapk3 (Erk1) (Prkm3)             | 0  | 37  | 0 | 14 |
| P35438 | Glutamate [NMDA] receptor subunit zeta-1 (N-methyl-D-aspartate receptor subunit NR1)                                                                                                                                                       | Grin1 (Glurz1)                   | 0  | 27  | 0 | 15 |
| P05622 | Beta-type platelet-derived growth factor receptor (EC 2.7.10.1) (PDGF-R-beta) (CD140 antigen-like family member B) (CD antigen CD140b)                                                                                                     | Pdgfrb (Pdgfr)                   | 0  | 34  | 0 | 16 |
| Q80TE4 | Signal-induced proliferation-associated 1-like protein 2 (SIPA1-like protein 2)                                                                                                                                                            | Sipa1l2 (Kiaa0545)               | 0  | 36  | 0 | 16 |
| P35918 | Vascular endothelial growth factor receptor 2 (VEGFR-2) (EC 2.7.10.1) (Protein-tyrosine kinase receptor flk-1) (Fetal liver kinase 1) (Kinase NYK) (CD antigen CD309)                                                                      | Kdr (Flk-1) (Flk1)               | 0  | 34  | 0 | 16 |
| Q3UTH8 | Rho guanine nucleotide exchange factor 9 (Rac/Cdc42 guanine nucleotide exchange factor 9) (Collybistin)                                                                                                                                    | Arhgef9 (Kiaa0424)               | 0  | 31  | 0 | 17 |
| Q62383 | Transcription elongation factor SPT6                                                                                                                                                                                                       | Supt6h (Kiaa0162)                | 0  | 28  | 0 | 17 |
| P83510 | Traf2 and NCK-interacting protein kinase (EC 2.7.11.1)                                                                                                                                                                                     | Tnik (Kiaa0551)                  | 0  | 54  | 0 | 17 |
| P63085 | Mitogen-activated protein kinase 1 (EC 2.7.11.24) (Extracellular signal-regulated kinase 2) (ERK-2) (Mitogen-activated protein kinase 2) (MAP kinase 2) (MAPK 2) (p42-MAPK) (ERT1)                                                         | Mapk1 (Erk2) (Mapk) (Prkm1)      | 0  | 112 | 0 | 19 |
| Q80U72 | Protein LAP4 (Protein scribble homolog)                                                                                                                                                                                                    | Scrib (Kiaa0147) (Lap4) (Scrib1) | 0  | 29  | 0 | 22 |
| P61750 | ADP-ribosylation factor 4                                                                                                                                                                                                                  | Arf4                             | 21 | 56  | 2 | 8  |

|                   |        |                                                                                                                                                           |                        |    |     |    |    |
|-------------------|--------|-----------------------------------------------------------------------------------------------------------------------------------------------------------|------------------------|----|-----|----|----|
|                   | P35278 | Ras-related protein Rab-5C                                                                                                                                | Rab5c                  | 60 | 79  | 4  | 12 |
|                   | P61205 | ADP-ribosylation factor 3                                                                                                                                 | Arf3                   | 32 | 423 | 6  | 17 |
|                   | Q7SIG6 | Development and differentiation-enhancing factor 2 (Pyk2 C-terminus-associated protein) (PAP) (Paxillin-associated protein with ARFGAP activity 3) (PAG3) | Ddef2 (Gm1523) (Gm592) | 36 | 43  | 7  | 17 |
|                   | Q61037 | Tuberin (Tuberous sclerosis 2 homolog protein)                                                                                                            | Tsc2                   | 22 | 46  | 38 | 91 |
|                   | P11679 | Keratin, type II cytoskeletal 8 (Cytokeratin-8) (CK-8) (Keratin-8) (K8) (Cytokeratin endo A)                                                              | Krt8 (Krt2-8)          | 61 | 175 | 13 | 29 |
|                   | Q80YX1 | Tenascin (TN) (Tenascin-C) (TN-C) (Hexabrachion)                                                                                                          | Tnc (Hxb)              | 80 | 200 | 22 | 45 |
|                   | P12815 | Programmed cell death protein 6 (Probable calcium-binding protein ALG-2) (PMP41) (ALG-257)                                                                | Pdcd6 (Alg2)           | 42 | 19  | 1  | 2  |
|                   | Q8R1B5 | Complexin-3 (Complexin III) (CPX III)                                                                                                                     | Cplx3                  | 16 | 29  | 2  | 4  |
|                   | Q61481 | Calcium/calmodulin-dependent 3',5'-cyclic nucleotide phosphodiesterase 1A (Cam-PDE 1A) (EC 3.1.4.17) (61 kDa Cam-PDE)                                     | Pde1a                  | 21 | 30  | 3  | 6  |
| protein transport | O35963 | Ras-related protein Rab-33B                                                                                                                               | Rab33b                 | 0  | 53  | 0  | 1  |
|                   | Q91V41 | Ras-related protein Rab-14                                                                                                                                | Rab14                  | 0  | 53  | 0  | 2  |
|                   | Q9JKM7 | Ras-related protein Rab-37                                                                                                                                | Rab37                  | 0  | 53  | 0  | 2  |
|                   | P62823 | Ras-related protein Rab-3C                                                                                                                                | Rab3c                  | 0  | 53  | 0  | 2  |
|                   | O70492 | Sorting nexin-3 (SDP3 protein)                                                                                                                            | Snx3                   | 0  | 54  | 0  | 2  |
|                   | P61027 | Ras-related protein Rab-10                                                                                                                                | Rab10                  | 0  | 82  | 0  | 3  |
|                   | Q504M8 | Ras-related protein Rab-26                                                                                                                                | Rab26                  | 0  | 53  | 0  | 3  |
|                   | P63011 | Ras-related protein Rab-3A                                                                                                                                | Rab3a                  | 0  | 53  | 0  | 3  |
|                   | Q9CZT8 | Ras-related protein Rab-3B                                                                                                                                | Rab3b                  | 0  | 53  | 0  | 3  |
|                   | P62746 | Rho-related GTP-binding protein RhoB                                                                                                                      | Rhob (Arhb)            | 0  | 82  | 0  | 3  |
|                   | Q923S9 | Ras-related protein Rab-30                                                                                                                                | Rab30 (Rsb30)          | 0  | 53  | 0  | 4  |
|                   | Q8CG50 | Ras-related protein Rab-43                                                                                                                                | Rab43                  | 0  | 53  | 0  | 4  |
|                   | P46638 | Ras-related protein Rab-11B                                                                                                                               | Rab11b                 | 0  | 49  | 0  | 4  |
|                   | Q8BHD0 | Ras-related protein Rab-39A (Rab-39)                                                                                                                      | Rab39 (Rab39a)         | 0  | 53  | 0  | 4  |
|                   | Q8BHC1 | Ras-related protein Rab-39B                                                                                                                               | Rab39b                 | 0  | 53  | 0  | 5  |

|                                       |        |                                                                                                                                                                       |                                  |    |     |    |    |
|---------------------------------------|--------|-----------------------------------------------------------------------------------------------------------------------------------------------------------------------|----------------------------------|----|-----|----|----|
|                                       | P14211 | Calreticulin (CRP55) (Calregulin) (HACBP) (ERp60)                                                                                                                     | Calr                             | 0  | 120 | 0  | 7  |
|                                       | P50396 | Rab GDP dissociation inhibitor alpha (Rab GDI alpha) (Guanosine diphosphate dissociation inhibitor 1) (GDI-1)                                                         | Gdi1 (Rabgdia)                   | 0  | 56  | 0  | 7  |
|                                       | Q9D1G1 | Ras-related protein Rab-1B                                                                                                                                            | Rab1b                            | 0  | 91  | 0  | 8  |
|                                       | P35279 | Ras-related protein Rab-6A (Rab-6)                                                                                                                                    | Rab6a (Rab6) (MNCb-1660)         | 0  | 76  | 0  | 9  |
|                                       | Q8BSL7 | ADP-ribosylation factor 2                                                                                                                                             | Arf2                             | 0  | 270 | 0  | 10 |
|                                       | P35283 | Ras-related protein Rab-12 (Rab-13)                                                                                                                                   | Rab12                            | 0  | 53  | 0  | 11 |
|                                       | P35276 | Ras-related protein Rab-3D                                                                                                                                            | Rab3d                            | 0  | 53  | 0  | 11 |
|                                       | Q60875 | Rho guanine nucleotide exchange factor 2 (Guanine nucleotide exchange factor H1) (GEF-H1) (Lymphoid blast crisis-like 1) (LBC'S first cousin) (Oncogene LFC) (Rhobin) | Arhgef2 (Kiaa0651) (Lbcl1) (Lfc) | 0  | 31  | 0  | 12 |
|                                       | P35235 | Tyrosine-protein phosphatase non-receptor type 11 (EC 3.1.3.48) (Protein-tyrosine phosphatase SYP) (SH-PTP2) (SHP-2) (Shp2)                                           | Ptpn11                           | 0  | 40  | 0  | 12 |
|                                       | P84084 | ADP-ribosylation factor 5                                                                                                                                             | Arf5                             | 0  | 210 | 0  | 13 |
|                                       | Q8R1U1 | Conserved oligomeric Golgi complex subunit 4 (COG complex subunit 4) (Component of oligomeric Golgi complex 4)                                                        | Cog4                             | 0  | 27  | 0  | 16 |
|                                       | P61750 | ADP-ribosylation factor 4                                                                                                                                             | Arf4                             | 21 | 56  | 2  | 8  |
|                                       | P35278 | Ras-related protein Rab-5C                                                                                                                                            | Rab5c                            | 60 | 79  | 4  | 12 |
|                                       | P61205 | ADP-ribosylation factor 3                                                                                                                                             | Arf3                             | 32 | 423 | 6  | 17 |
|                                       | Q99PW8 | Kinesin-like protein KIF17 (MmKIF17)                                                                                                                                  | Kif17                            | 24 | 44  | 13 | 35 |
|                                       | Q61037 | Tuberin (Tuberous sclerosis 2 homolog protein)                                                                                                                        | Tsc2                             | 22 | 46  | 38 | 91 |
|                                       | O55029 | Coatomer subunit beta' (Beta'-coat protein) (Beta'-COP) (p102)                                                                                                        | Copb2                            | 48 | 31  | 4  | 8  |
| establishment of protein localization | O35963 | Ras-related protein Rab-33B                                                                                                                                           | Rab33b                           | 0  | 53  | 0  | 1  |
|                                       | Q91V41 | Ras-related protein Rab-14                                                                                                                                            | Rab14                            | 0  | 53  | 0  | 2  |
|                                       | Q9JKM7 | Ras-related protein Rab-37                                                                                                                                            | Rab37                            | 0  | 53  | 0  | 2  |
|                                       | P62823 | Ras-related protein Rab-3C                                                                                                                                            | Rab3c                            | 0  | 53  | 0  | 2  |
|                                       | O70492 | Sorting nexin-3 (SDP3 protein)                                                                                                                                        | Snx3                             | 0  | 54  | 0  | 2  |

|        |                                                                                                                                                                       |                                           |   |     |   |    |
|--------|-----------------------------------------------------------------------------------------------------------------------------------------------------------------------|-------------------------------------------|---|-----|---|----|
| P61027 | Ras-related protein Rab-10                                                                                                                                            | Rab10                                     | 0 | 82  | 0 | 3  |
| Q504M8 | Ras-related protein Rab-26                                                                                                                                            | Rab26                                     | 0 | 53  | 0 | 3  |
| P63011 | Ras-related protein Rab-3A                                                                                                                                            | Rab3a                                     | 0 | 53  | 0 | 3  |
| Q9CZT8 | Ras-related protein Rab-3B                                                                                                                                            | Rab3b                                     | 0 | 53  | 0 | 3  |
| P62746 | Rho-related GTP-binding protein RhoB                                                                                                                                  | Rhob<br>(Arhb)                            | 0 | 82  | 0 | 3  |
| Q923S9 | Ras-related protein Rab-30                                                                                                                                            | Rab30<br>(Rsb30)                          | 0 | 53  | 0 | 4  |
| Q8CG50 | Ras-related protein Rab-43                                                                                                                                            | Rab43                                     | 0 | 53  | 0 | 4  |
| P46638 | Ras-related protein Rab-11B                                                                                                                                           | Rab11b                                    | 0 | 49  | 0 | 4  |
| Q8BHD0 | Ras-related protein Rab-39A (Rab-39)                                                                                                                                  | Rab39<br>(Rab39a)                         | 0 | 53  | 0 | 4  |
| Q8BHC1 | Ras-related protein Rab-39B                                                                                                                                           | Rab39b                                    | 0 | 53  | 0 | 5  |
| P14211 | Calreticulin (CRP55) (Calregulin) (HACBP) (ERp60)                                                                                                                     | Calr                                      | 0 | 120 | 0 | 7  |
| P50396 | Rab GDP dissociation inhibitor alpha (Rab GDI alpha) (Guanosine diphosphate dissociation inhibitor 1) (GDI-1)                                                         | Gdi1<br>(Rabgdia)                         | 0 | 56  | 0 | 7  |
| Q9D1G1 | Ras-related protein Rab-1B                                                                                                                                            | Rab1b                                     | 0 | 91  | 0 | 8  |
| P35279 | Ras-related protein Rab-6A (Rab-6)                                                                                                                                    | Rab6a<br>(Rab6)<br>(MNCb-1660)            | 0 | 76  | 0 | 9  |
| Q8BSL7 | ADP-ribosylation factor 2                                                                                                                                             | Arf2                                      | 0 | 270 | 0 | 10 |
| P35283 | Ras-related protein Rab-12 (Rab-13)                                                                                                                                   | Rab12                                     | 0 | 53  | 0 | 11 |
| P35276 | Ras-related protein Rab-3D                                                                                                                                            | Rab3d                                     | 0 | 53  | 0 | 11 |
| Q60875 | Rho guanine nucleotide exchange factor 2 (Guanine nucleotide exchange factor H1) (GEF-H1) (Lymphoid blast crisis-like 1) (LBC'S first cousin) (Oncogene LFC) (Rhobin) | Arhgef2<br>(Kiaa0651)<br>(Lbcl1)<br>(Lfc) | 0 | 31  | 0 | 12 |
| P35235 | Tyrosine-protein phosphatase non-receptor type 11 (EC 3.1.3.48) (Protein-tyrosine phosphatase SYP) (SH-PTP2) (SHP-2) (Shp2)                                           | Ptpn11                                    | 0 | 40  | 0 | 12 |
| P84084 | ADP-ribosylation factor 5                                                                                                                                             | Arf5                                      | 0 | 210 | 0 | 13 |

|                            |        |                                                                                                                               |                             |    |     |    |    |
|----------------------------|--------|-------------------------------------------------------------------------------------------------------------------------------|-----------------------------|----|-----|----|----|
|                            | Q8R1U1 | Conserved oligomeric Golgi complex subunit 4 (COG complex subunit 4) (Component of oligomeric Golgi complex 4)                | Cog4                        | 0  | 27  | 0  | 16 |
|                            | P61750 | ADP-ribosylation factor 4                                                                                                     | Arf4                        | 21 | 56  | 2  | 8  |
|                            | P35278 | Ras-related protein Rab-5C                                                                                                    | Rab5c                       | 60 | 79  | 4  | 12 |
|                            | P61205 | ADP-ribosylation factor 3                                                                                                     | Arf3                        | 32 | 423 | 6  | 17 |
|                            | Q99PW8 | Kinesin-like protein KIF17 (MmKIF17)                                                                                          | Kif17                       | 24 | 44  | 13 | 35 |
|                            | Q61037 | Tuberin (Tuberous sclerosis 2 homolog protein)                                                                                | Tsc2                        | 22 | 46  | 38 | 91 |
|                            | O55029 | Coatomer subunit beta' (Beta'-coat protein) (Beta'-COP) (p102)                                                                | Copb2                       | 48 | 31  | 4  | 8  |
| secretion                  | P62823 | Ras-related protein Rab-3C                                                                                                    | Rab3c                       | 0  | 53  | 0  | 2  |
|                            | Q504M8 | Ras-related protein Rab-26                                                                                                    | Rab26                       | 0  | 53  | 0  | 3  |
|                            | P63011 | Ras-related protein Rab-3A                                                                                                    | Rab3a                       | 0  | 53  | 0  | 3  |
|                            | Q9CZT8 | Ras-related protein Rab-3B                                                                                                    | Rab3b                       | 0  | 53  | 0  | 3  |
|                            | P10107 | Annexin A1 (Annexin-1) (Annexin I) (Lipocortin I) (Calpactin II) (Chromobindin-9) (p35) (Phospholipase A2 inhibitory protein) | Anxa1 (Anx1) (Lpc-1) (Lpc1) | 0  | 26  | 0  | 6  |
|                            | P35279 | Ras-related protein Rab-6A (Rab-6)                                                                                            | Rab6a (Rab6) (MNCb-1660)    | 0  | 76  | 0  | 9  |
|                            | Q8BSL7 | ADP-ribosylation factor 2                                                                                                     | Arf2                        | 0  | 270 | 0  | 10 |
|                            | P35276 | Ras-related protein Rab-3D                                                                                                    | Rab3d                       | 0  | 53  | 0  | 11 |
|                            | P35235 | Tyrosine-protein phosphatase non-receptor type 11 (EC 3.1.3.48) (Protein-tyrosine phosphatase SYP) (SH-PTP2) (SHP-2) (Shp2)   | Ptpn11                      | 0  | 40  | 0  | 12 |
|                            | P84084 | ADP-ribosylation factor 5                                                                                                     | Arf5                        | 0  | 210 | 0  | 13 |
|                            | P61750 | ADP-ribosylation factor 4                                                                                                     | Arf4                        | 21 | 56  | 2  | 8  |
|                            | P61205 | ADP-ribosylation factor 3                                                                                                     | Arf3                        | 32 | 423 | 6  | 17 |
|                            | Q8R1B5 | Complexin-3 (Complexin III) (CPX III)                                                                                         | Cplx3                       | 16 | 29  | 2  | 4  |
|                            | O55029 | Coatomer subunit beta' (Beta'-coat protein) (Beta'-COP) (p102)                                                                | Copb2                       | 48 | 31  | 4  | 8  |
| macromolecule localization | O35963 | Ras-related protein Rab-33B                                                                                                   | Rab33b                      | 0  | 53  | 0  | 1  |
|                            | Q91V41 | Ras-related protein Rab-14                                                                                                    | Rab14                       | 0  | 53  | 0  | 2  |
|                            | Q9JKM7 | Ras-related protein Rab-37                                                                                                    | Rab37                       | 0  | 53  | 0  | 2  |



|        |                                                                                                                                                                       |                                             |   |     |   |    |
|--------|-----------------------------------------------------------------------------------------------------------------------------------------------------------------------|---------------------------------------------|---|-----|---|----|
| P62823 | Ras-related protein Rab-3C                                                                                                                                            | Rab3c                                       | 0 | 53  | 0 | 2  |
| O70492 | Sorting nexin-3 (SDP3 protein)                                                                                                                                        | Snx3                                        | 0 | 54  | 0 | 2  |
| P61027 | Ras-related protein Rab-10                                                                                                                                            | Rab10                                       | 0 | 82  | 0 | 3  |
| Q504M8 | Ras-related protein Rab-26                                                                                                                                            | Rab26                                       | 0 | 53  | 0 | 3  |
| P63011 | Ras-related protein Rab-3A                                                                                                                                            | Rab3a                                       | 0 | 53  | 0 | 3  |
| Q9CZT8 | Ras-related protein Rab-3B                                                                                                                                            | Rab3b                                       | 0 | 53  | 0 | 3  |
| P62746 | Rho-related GTP-binding protein RhoB                                                                                                                                  | Rhob<br>(Arhb)                              | 0 | 82  | 0 | 3  |
| Q923S9 | Ras-related protein Rab-30                                                                                                                                            | Rab30<br>(Rsb30)                            | 0 | 53  | 0 | 4  |
| Q8CG50 | Ras-related protein Rab-43                                                                                                                                            | Rab43                                       | 0 | 53  | 0 | 4  |
| P46638 | Ras-related protein Rab-11B                                                                                                                                           | Rab11b                                      | 0 | 49  | 0 | 4  |
| Q8BHD0 | Ras-related protein Rab-39A (Rab-39)                                                                                                                                  | Rab39<br>(Rab39a)                           | 0 | 53  | 0 | 4  |
| Q8BHC1 | Ras-related protein Rab-39B                                                                                                                                           | Rab39b                                      | 0 | 53  | 0 | 5  |
| P14211 | Calreticulin (CRP55) (Calregulin) (HACBP) (ERp60)                                                                                                                     | Calr                                        | 0 | 120 | 0 | 7  |
| P50396 | Rab GDP dissociation inhibitor alpha (Rab GDI alpha) (Guanosine diphosphate dissociation inhibitor 1) (GDI-1)                                                         | Gdi1<br>(Rabgdia)                           | 0 | 56  | 0 | 7  |
| P35922 | Fragile X mental retardation protein 1 homolog (Protein FMR-1) (FMRP) (mFmr1p)                                                                                        | Fmr1<br>(Fmr-1)                             | 0 | 36  | 0 | 8  |
| Q9D1G1 | Ras-related protein Rab-1B                                                                                                                                            | Rab1b                                       | 0 | 91  | 0 | 8  |
| P35279 | Ras-related protein Rab-6A (Rab-6)                                                                                                                                    | Rab6a<br>(Rab6)<br>(MNCb-1660)              | 0 | 76  | 0 | 9  |
| Q8BSL7 | ADP-ribosylation factor 2                                                                                                                                             | Arf2                                        | 0 | 270 | 0 | 10 |
| P35283 | Ras-related protein Rab-12 (Rab-13)                                                                                                                                   | Rab12                                       | 0 | 53  | 0 | 11 |
| P35276 | Ras-related protein Rab-3D                                                                                                                                            | Rab3d                                       | 0 | 53  | 0 | 11 |
| Q60875 | Rho guanine nucleotide exchange factor 2 (Guanine nucleotide exchange factor H1) (GEF-H1) (Lymphoid blast crisis-like 1) (LBC'S first cousin) (Oncogene LFC) (Rhobin) | Arhgef2<br>(Kiaa0651)<br>) (Lbcl1)<br>(Lfc) | 0 | 31  | 0 | 12 |

|                       |        |                                                                                                                                                                                                   |                                  |    |     |    |    |
|-----------------------|--------|---------------------------------------------------------------------------------------------------------------------------------------------------------------------------------------------------|----------------------------------|----|-----|----|----|
|                       | P35235 | Tyrosine-protein phosphatase non-receptor type 11 (EC 3.1.3.48) (Protein-tyrosine phosphatase SYP) (SH-PTP2) (SHP-2) (Shp2)                                                                       | Ptpn11                           | 0  | 40  | 0  | 12 |
|                       | P84084 | ADP-ribosylation factor 5                                                                                                                                                                         | Arf5                             | 0  | 210 | 0  | 13 |
|                       | Q8R1U1 | Conserved oligomeric Golgi complex subunit 4 (COG complex subunit 4) (Component of oligomeric Golgi complex 4)                                                                                    | Cog4                             | 0  | 27  | 0  | 16 |
|                       | Q80U72 | Protein LAP4 (Protein scribble homolog)                                                                                                                                                           | Scrib (Kiaa0147) (Lap4) (Scrib1) | 0  | 29  | 0  | 22 |
|                       | Q91ZD4 | Vang-like protein 2 (Van Gogh-like protein 2) (Loop-tail-associated protein) (Loop-tail protein 1)                                                                                                | Vangl2 (Lpp1) (Ltap)             | 0  | 27  | 0  | 31 |
|                       | P61750 | ADP-ribosylation factor 4                                                                                                                                                                         | Arf4                             | 21 | 56  | 2  | 8  |
|                       | P35278 | Ras-related protein Rab-5C                                                                                                                                                                        | Rab5c                            | 60 | 79  | 4  | 12 |
|                       | P61205 | ADP-ribosylation factor 3                                                                                                                                                                         | Arf3                             | 32 | 423 | 6  | 17 |
|                       | Q99PW8 | Kinesin-like protein KIF17 (MmKIF17)                                                                                                                                                              | Kif17                            | 24 | 44  | 13 | 35 |
|                       | Q61037 | Tuberin (Tuberous sclerosis 2 homolog protein)                                                                                                                                                    | Tsc2                             | 22 | 46  | 38 | 91 |
|                       | O55029 | Coatamer subunit beta' (Beta'-coat protein) (Beta'-COP) (p102)                                                                                                                                    | Copb2                            | 48 | 31  | 4  | 8  |
| biological regulation | Q91ZR3 | CREB/ATF bZIP transcription factor (Host cell factor-binding transcription factor Zhangfei) (HCF-binding transcription factor Zhangfei) (Tyrosine kinase-associated leucine zipper protein LAZip) | Crebzf (Zf)                      | 0  | 36  | 0  | 1  |
|                       | P62823 | Ras-related protein Rab-3C                                                                                                                                                                        | Rab3c                            | 0  | 53  | 0  | 2  |
|                       | P21107 | Tropomyosin alpha-3 chain (Tropomyosin-3) (Gamma-tropomyosin)                                                                                                                                     | Tpm3 (Tpm-5) (Tpm5)              | 0  | 32  | 0  | 2  |
|                       | P61027 | Ras-related protein Rab-10                                                                                                                                                                        | Rab10                            | 0  | 82  | 0  | 3  |
|                       | Q504M8 | Ras-related protein Rab-26                                                                                                                                                                        | Rab26                            | 0  | 53  | 0  | 3  |
|                       | P63011 | Ras-related protein Rab-3A                                                                                                                                                                        | Rab3a                            | 0  | 53  | 0  | 3  |
|                       | Q9CZT8 | Ras-related protein Rab-3B                                                                                                                                                                        | Rab3b                            | 0  | 53  | 0  | 3  |
|                       | P62746 | Rho-related GTP-binding protein RhoB                                                                                                                                                              | Rhob (Arhb)                      | 0  | 82  | 0  | 3  |

|        |                                                                                                                                                                                                       |                                 |   |     |   |   |
|--------|-------------------------------------------------------------------------------------------------------------------------------------------------------------------------------------------------------|---------------------------------|---|-----|---|---|
| Q8CDN6 | Thioredoxin-like protein 1 (32 kDa thioredoxin-related protein)                                                                                                                                       | Txn1<br>(Trp32)<br>(Txnl)       | 0 | 173 | 0 | 3 |
| Q8K0V4 | CCR4-NOT transcription complex subunit 3 (CCR4-associated factor 3)                                                                                                                                   | Cnot3<br>(Not3)                 | 0 | 27  | 0 | 4 |
| Q62048 | Astrocytic phosphoprotein PEA-15                                                                                                                                                                      | Pea15<br>(Pea15a)               | 0 | 38  | 0 | 4 |
| Q80TJ7 | PHD finger protein 8                                                                                                                                                                                  | Phf8<br>(Kiaa1111)              | 0 | 25  | 0 | 4 |
| P46638 | Ras-related protein Rab-11B                                                                                                                                                                           | Rab11b                          | 0 | 49  | 0 | 4 |
| Q7TPD3 | Roundabout homolog 2                                                                                                                                                                                  | Robo2<br>(Kiaa1568)             | 0 | 30  | 0 | 4 |
| O35490 | Betaine--homocysteine S-methyltransferase 1 (EC 2.1.1.5)                                                                                                                                              | Bhmt                            | 0 | 28  | 0 | 5 |
| P70677 | Caspase-3 (CASP-3) (EC 3.4.22.56) (Apopain) (Cysteine protease CPP32) (CPP-32) (Yama protein) (SREBP cleavage activity 1) (SCA-1) (LICE) [Cleaved into: Caspase-3 subunit p17; Caspase-3 subunit p12] | Casp3<br>(Cp32)                 | 0 | 29  | 0 | 5 |
| Q9DBY5 | Chromobox protein homolog 6                                                                                                                                                                           | Cbx6                            | 0 | 26  | 0 | 5 |
| Q8BWG9 | Calcium release-activated calcium channel protein 1 (Protein orai-1) (Transmembrane protein 142A)                                                                                                     | Orai1<br>(Cracm1)<br>(Tmem142a) | 0 | 33  | 0 | 5 |
| Q60668 | Heterogeneous nuclear ribonucleoprotein D0 (hnRNP D0) (AU-rich element RNA-binding protein 1)                                                                                                         | Hnrnpd<br>(Auf1)<br>(Hnrpd)     | 0 | 34  | 0 | 5 |
| P09103 | Protein disulfide-isomerase (PDI) (EC 5.3.4.1) (Prolyl 4-hydroxylase subunit beta) (Cellular thyroid hormone-binding protein) (p55) (Erp59)                                                           | P4hb<br>(Pdia1)                 | 0 | 28  | 0 | 5 |
| P58389 | Serine/threonine-protein phosphatase 2A regulatory subunit B' (PP2A, subunit B', PR53 isoform) (Phosphotyrosyl phosphatase activator) (PTPA)                                                          | Ppp2r4<br>(Ptpa)                | 0 | 32  | 0 | 5 |

|        |                                                                                                                                                                   |                             |   |     |   |   |
|--------|-------------------------------------------------------------------------------------------------------------------------------------------------------------------|-----------------------------|---|-----|---|---|
| Q99K90 | Mitogen-activated protein kinase kinase kinase 7-interacting protein 2 (TAK1-binding protein 2) (TAB2)                                                            | Map3k7ip2 (Kiaa0733) (Tab2) | 0 | 25  | 0 | 5 |
| Q9ER58 | Testican-2 (SPARC/osteonectin, CWCV, and Kazal-like domains proteoglycan 2)                                                                                       | Spock2 (Ticn2)              | 0 | 26  | 0 | 5 |
| Q7TM95 | Tigger transposable element-derived protein 3                                                                                                                     | Tigd3                       | 0 | 26  | 0 | 5 |
| P10107 | Annexin A1 (Annexin-1) (Annexin I) (Lipocortin I) (Calpactin II) (Chromobindin-9) (p35) (Phospholipase A2 inhibitory protein)                                     | Anxa1 (Anx1) (Lpc-1) (Lpc1) | 0 | 26  | 0 | 6 |
| Q91X20 | Set1/Ash2 histone methyltransferase complex subunit ASH2 (ASH2-like protein)                                                                                      | Ash2l                       | 0 | 26  | 0 | 6 |
| P63330 | Serine/threonine-protein phosphatase 2A catalytic subunit alpha isoform (PP2A-alpha) (EC 3.1.3.16)                                                                | Ppp2ca                      | 0 | 101 | 0 | 6 |
| P14211 | Calreticulin (CRP55) (Calregulin) (HACBP) (ERp60)                                                                                                                 | Calr                        | 0 | 120 | 0 | 7 |
| P50396 | Rab GDP dissociation inhibitor alpha (Rab GDI alpha) (Guanosine diphosphate dissociation inhibitor 1) (GDI-1)                                                     | Gdi1 (Rabgdia)              | 0 | 56  | 0 | 7 |
| Q99K48 | Non-POU domain-containing octamer-binding protein (NonO protein)                                                                                                  | Nono                        | 0 | 41  | 0 | 7 |
| Q99JX1 | Transcription initiation factor TFIID subunit 11 (Transcription initiation factor TFIID 28 kDa subunit) (TAF(II)28) (TAFII-28) (TAFII28) (TFIID subunit p30-beta) | Taf11                       | 0 | 37  | 0 | 7 |
| Q715T0 | Thioredoxin domain-containing protein 3 (Spermatid-specific thioredoxin-2) (Sptrx-2)                                                                              | Txndc3 (Sptrx2)             | 0 | 25  | 0 | 7 |
| Q7TPR4 | Alpha-actinin-1 (Alpha-actinin cytoskeletal isoform) (Non-muscle alpha-actinin-1) (F-actin cross-linking protein)                                                 | Actn1                       | 0 | 34  | 0 | 8 |
| Q9DAR7 | Scavenger mRNA-decapping enzyme DcpS (EC 3.-.-) (DCS-1) (Hint-related 7meGMP-directed hydrolase) (Histidine triad protein member 5) (HINT-5)                      | Dcps (Dcs1) (Hint5)         | 0 | 76  | 0 | 8 |

|        |                                                                                                                                                                              |                            |   |    |   |    |
|--------|------------------------------------------------------------------------------------------------------------------------------------------------------------------------------|----------------------------|---|----|---|----|
| P47857 | 6-phosphofructokinase, muscle type (EC 2.7.1.11) (Phosphofructokinase 1) (Phosphohexokinase) (Phosphofructo-1-kinase isozyme A) (PFK-A) (Phosphofructokinase-M)              | Pfkm (Pfk-m) (Pfka)        | 0 | 64 | 0 | 8  |
| Q9D0D5 | General transcription factor IIE subunit 1 (Transcription initiation factor IIE subunit alpha) (TFIIE-alpha) (General transcription factor IIE 56 kDa subunit)               | Gtf2e1                     | 0 | 27 | 0 | 8  |
| P07356 | Annexin A2 (Annexin-2) (Annexin II) (Lipocortin II) (Calpactin I heavy chain) (Chromobindin-8) (p36) (Protein I) (Placental anticoagulant protein IV) (PAP-IV)               | Anxa2 (Anx2) (Cal1h)       | 0 | 51 | 0 | 9  |
| P60762 | Mortality factor 4-like protein 1 (MORF-related gene 15 protein) (Transcription factor-like protein MRG15) (Testis-expressed gene 189 protein)                               | Morf411 (Mrg15) (Tex189)   | 0 | 33 | 0 | 9  |
| O88907 | E3 SUMO-protein ligase PIAS1 (Protein inhibitor of activated STAT protein 1) (DEAD/H box-binding protein 1)                                                                  | Pias1 (Ddxbp1)             | 0 | 31 | 0 | 9  |
| P15806 | Transcription factor E2-alpha (Immunoglobulin enhancer-binding factor E12/E47) (Transcription factor 3) (TCF-3) (Transcription factor A1)                                    | Tcf3 (Alf2) (Me2) (Tcfe2a) | 0 | 28 | 0 | 9  |
| P57780 | Alpha-actinin-4 (Non-muscle alpha-actinin 4) (F-actin cross-linking protein)                                                                                                 | Actn4                      | 0 | 34 | 0 | 10 |
| P36898 | Bone morphogenetic protein receptor type-1B (EC 2.7.11.30) (Serine/threonine-protein kinase receptor R6) (SKR6) (Activin receptor-like kinase 6) (ALK-6) (CD antigen CDw293) | Bmpr1b (Acvrlk6)           | 0 | 26 | 0 | 10 |
| Q80Y50 | Calmodulin-binding transcription activator 2                                                                                                                                 | Camta2 (Kiaa0909)          | 0 | 26 | 0 | 10 |
| Q61823 | Programmed cell death protein 4 (Topoisomerase-inhibitor suppressed protein) (Protein MA-3)                                                                                  | Pdcd4 (Ma3) (Tis)          | 0 | 27 | 0 | 10 |
| P35276 | Ras-related protein Rab-3D                                                                                                                                                   | Rab3d                      | 0 | 53 | 0 | 11 |

|        |                                                                                                                                                                       |                                  |   |    |   |    |
|--------|-----------------------------------------------------------------------------------------------------------------------------------------------------------------------|----------------------------------|---|----|---|----|
| Q99MK9 | Ras association domain-containing protein 1 (Protein 123F2)                                                                                                           | Rassf1                           | 0 | 29 | 0 | 11 |
| Q9Z1Y4 | Thyroid receptor-interacting protein 6 (TRIP-6) (Zyxin-related protein 1) (ZRP-1)                                                                                     | Trip6 (Zrp1)                     | 0 | 34 | 0 | 11 |
| P35917 | Vascular endothelial growth factor receptor 3 (VEGFR-3) (EC 2.7.10.1) (Tyrosine-protein kinase receptor FLT4)                                                         | Flt4 (Flt-4)                     | 0 | 34 | 0 | 11 |
| Q60875 | Rho guanine nucleotide exchange factor 2 (Guanine nucleotide exchange factor H1) (GEF-H1) (Lymphoid blast crisis-like 1) (LBC'S first cousin) (Oncogene LFC) (Rhobin) | Arhgef2 (Kiaa0651) (Lbcl1) (Lfc) | 0 | 31 | 0 | 12 |
| P35235 | Tyrosine-protein phosphatase non-receptor type 11 (EC 3.1.3.48) (Protein-tyrosine phosphatase SYP) (SH-PTP2) (SHP-2) (Shp2)                                           | Ptpn11                           | 0 | 40 | 0 | 12 |
| P27773 | Protein disulfide-isomerase A3 (EC 5.3.4.1) (Disulfide isomerase ER-60) (ERp60) (58 kDa microsomal protein) (p58) (ERp57)                                             | Pdia3 (Erp) (Erp60) (Grp58)      | 0 | 98 | 0 | 14 |
| Q9CWI3 | BRCA2 and CDKN1A-interacting protein                                                                                                                                  | Bccip                            | 0 | 28 | 0 | 15 |
| P35438 | Glutamate [NMDA] receptor subunit zeta-1 (N-methyl-D-aspartate receptor subunit NR1)                                                                                  | Grin1 (Glurz1)                   | 0 | 27 | 0 | 15 |
| P05622 | Beta-type platelet-derived growth factor receptor (EC 2.7.10.1) (PDGF-R-beta) (CD140 antigen-like family member B) (CD antigen CD140b)                                | Pdgfrb (Pdgfr)                   | 0 | 34 | 0 | 16 |
| Q80TE4 | Signal-induced proliferation-associated 1-like protein 2 (SIPA1-like protein 2)                                                                                       | Sipa1l2 (Kiaa0545)               | 0 | 36 | 0 | 16 |
| P08071 | Lactotransferrin (Lactoferrin) (EC 3.4.21.-)                                                                                                                          | Ltf                              | 0 | 25 | 0 | 16 |
| P35918 | Vascular endothelial growth factor receptor 2 (VEGFR-2) (EC 2.7.10.1) (Protein-tyrosine kinase receptor flk-1) (Fetal liver kinase 1) (Kinase NYK) (CD antigen CD309) | Kdr (Flk-1) (Flk1)               | 0 | 34 | 0 | 16 |
| Q3UTH8 | Rho guanine nucleotide exchange factor 9 (Rac/Cdc42 guanine nucleotide exchange factor 9) (Collybistin)                                                               | Arhgef9 (Kiaa0424)               | 0 | 31 | 0 | 17 |

|        |                                                                                                                                                                                                                                          |                             |    |     |   |    |
|--------|------------------------------------------------------------------------------------------------------------------------------------------------------------------------------------------------------------------------------------------|-----------------------------|----|-----|---|----|
| Q80XI3 | Eukaryotic translation initiation factor 4 gamma 3 (eIF-4-gamma 3) (eIF-4G 3) (eIF4G 3) (eIF-4-gamma II) (eIF4GII)                                                                                                                       | Eif4g3                      | 0  | 58  | 0 | 17 |
| Q62383 | Transcription elongation factor SPT6                                                                                                                                                                                                     | Supt6h (Kiaa0162)           | 0  | 28  | 0 | 17 |
| P63085 | Mitogen-activated protein kinase 1 (EC 2.7.11.24) (Extracellular signal-regulated kinase 2) (ERK-2) (Mitogen-activated protein kinase 2) (MAP kinase 2) (MAPK 2) (p42-MAPK) (ERT1)                                                       | Mapk1 (Erk2) (Mapk) (Prkm1) | 0  | 112 | 0 | 19 |
| Q810T2 | G2/mitotic-specific cyclin-B3                                                                                                                                                                                                            | Ccnb3 (Cycb3)               | 0  | 29  | 0 | 22 |
| Q91YR7 | Pre-mRNA-processing factor 6 (U5 snRNP-associated 102 kDa protein) (U5-102 kDa protein) (PRP6 homolog)                                                                                                                                   | Prpf6                       | 0  | 25  | 0 | 22 |
| Q62468 | Villin-1                                                                                                                                                                                                                                 | Vil1 (Vil)                  | 0  | 26  | 0 | 22 |
| Q8BHZ4 | Zinc finger protein 592 (Zfp-592)                                                                                                                                                                                                        | Znf592 (Kiaa0211) (Zfp592)  | 0  | 26  | 0 | 24 |
| O08532 | Voltage-dependent calcium channel subunit alpha-2/delta-1 (Voltage-gated calcium channel subunit alpha-2/delta-1) [Cleaved into: Voltage-dependent calcium channel subunit alpha-2-1; Voltage-dependent calcium channel subunit delta-1] | Cacna2d1 (Cacna2)           | 0  | 25  | 0 | 26 |
| Q9EQM6 | Protein DGCR8 (DiGeorge syndrome critical region 8 homolog) (Gy1)                                                                                                                                                                        | Dgcr8                       | 0  | 28  | 0 | 29 |
| Q69ZM6 | Serine/threonine-protein kinase 36 (EC 2.7.11.1) (Fused homolog)                                                                                                                                                                         | Stk36 (Kiaa1278)            | 0  | 29  | 0 | 35 |
| Q9CQM9 | Glutaredoxin-3 (Thioredoxin-like protein 2) (PKC-interacting cousin of thioredoxin) (PKC-theta-interacting protein) (PKCq-interacting protein)                                                                                           | Glrx3 (Picot) (Txnl2)       | 17 | 77  | 3 | 11 |

|        |                                                                                                                                                                                                                                                                      |                                  |    |     |    |    |
|--------|----------------------------------------------------------------------------------------------------------------------------------------------------------------------------------------------------------------------------------------------------------------------|----------------------------------|----|-----|----|----|
| P48036 | Annexin A5 (Annexin-5) (Annexin V) (Lipocortin V) (Endonexin II) (Calphobindin I) (CBP-I) (Placental anticoagulant protein I) (PAP-I) (Placental anticoagulant protein 4) (PP4) (Thromboplastin inhibitor) (Vascular anticoagulant-alpha) (VAC-alpha) (Anchorin CII) | Anxa5 (Anx5)                     | 36 | 202 | 5  | 16 |
| P35278 | Ras-related protein Rab-5C                                                                                                                                                                                                                                           | Rab5c                            | 60 | 79  | 4  | 12 |
| Q7SIG6 | Development and differentiation-enhancing factor 2 (Pyk2 C-terminus-associated protein) (PAP) (Paxillin-associated protein with ARFGAP activity 3) (PAG3)                                                                                                            | Ddef2 (Gm1523) (Gm592)           | 36 | 43  | 7  | 17 |
| Q61037 | Tuberin (Tuberous sclerosis 2 homolog protein)                                                                                                                                                                                                                       | Tsc2                             | 22 | 46  | 38 | 91 |
| Q99020 | Heterogeneous nuclear ribonucleoprotein A/B (hnRNP A/B) (CArG-binding factor-A) (CBF-A)                                                                                                                                                                              | Hnrnpab (Cbf-a) (Cgbfa) (Hnrpab) | 56 | 138 | 5  | 11 |
| Q9R244 | Short transient receptor potential channel 2 (TrpC2) (Transient receptor protein 2) (TRP-2) (mTrp2)                                                                                                                                                                  | Trpc2 (Trp2) (Trrp2)             | 25 | 55  | 45 | 92 |
| P12815 | Programmed cell death protein 6 (Probable calcium-binding protein ALG-2) (PMP41) (ALG-257)                                                                                                                                                                           | Pdcd6 (Alg2)                     | 42 | 19  | 1  | 2  |
| Q8R1B5 | Complexin-3 (Complexin III) (CPX III)                                                                                                                                                                                                                                | Cplx3                            | 16 | 29  | 2  | 4  |
| Q08024 | Core-binding factor subunit beta (CBF-beta) (Polyomavirus enhancer-binding protein 2 beta subunit) (PEBP2-beta) (PEA2-beta) (SL3-3 enhancer factor 1 subunit beta) (SL3/AKV core-binding factor beta subunit)                                                        | Cbfb (Pebp2b) (Pebpb2)           | 26 | 188 | 2  | 4  |
| P63028 | Translationally-controlled tumor protein (TCTP) (p23) (21 kDa polypeptide) (p21)                                                                                                                                                                                     | Tpt1 (Trt)                       | 92 | 216 | 4  | 8  |
| P47878 | Insulin-like growth factor-binding protein 3 (IGF-binding protein 3) (IGFBP-3) (IBP-3)                                                                                                                                                                               | Igfbp3 (Igfbp-3)                 | 18 | 26  | 5  | 10 |
| P34022 | Ran-specific GTPase-activating protein (Ran-binding protein 1) (RANBP1) (Hpal1 tiny fragments locus 9a protein)                                                                                                                                                      | Ranbp1 (Htf9-a) (Htf9a)          | 49 | 24  | 5  | 10 |



|                      |        |                                                                                                                                                              |                          |    |     |    |    |
|----------------------|--------|--------------------------------------------------------------------------------------------------------------------------------------------------------------|--------------------------|----|-----|----|----|
|                      | Q9WTR1 | Transient receptor potential cation channel subfamily V member 2 (TrpV2) (Osm-9-like TRP channel 2) (OTRPC2) (Growth factor-regulated calcium channel) (GRC) | Trpv2 (Grc)              | 22 | 30  | 5  | 10 |
|                      | Q62318 | Transcription intermediary factor 1-beta (TIF1-beta) (Tripartite motif-containing protein 28) (KRAB-A-interacting protein) (KRIP-1)                          | Trim28 (Krip1) (Tif1b)   | 24 | 84  | 10 | 20 |
| protein localization | O35963 | Ras-related protein Rab-33B                                                                                                                                  | Rab33b                   | 0  | 53  | 0  | 1  |
|                      | Q91V41 | Ras-related protein Rab-14                                                                                                                                   | Rab14                    | 0  | 53  | 0  | 2  |
|                      | Q9JKM7 | Ras-related protein Rab-37                                                                                                                                   | Rab37                    | 0  | 53  | 0  | 2  |
|                      | P62823 | Ras-related protein Rab-3C                                                                                                                                   | Rab3c                    | 0  | 53  | 0  | 2  |
|                      | O70492 | Sorting nexin-3 (SDP3 protein)                                                                                                                               | Snx3                     | 0  | 54  | 0  | 2  |
|                      | P61027 | Ras-related protein Rab-10                                                                                                                                   | Rab10                    | 0  | 82  | 0  | 3  |
|                      | Q504M8 | Ras-related protein Rab-26                                                                                                                                   | Rab26                    | 0  | 53  | 0  | 3  |
|                      | P63011 | Ras-related protein Rab-3A                                                                                                                                   | Rab3a                    | 0  | 53  | 0  | 3  |
|                      | Q9CZT8 | Ras-related protein Rab-3B                                                                                                                                   | Rab3b                    | 0  | 53  | 0  | 3  |
|                      | P62746 | Rho-related GTP-binding protein RhoB                                                                                                                         | Rhob (Arhb)              | 0  | 82  | 0  | 3  |
|                      | Q923S9 | Ras-related protein Rab-30                                                                                                                                   | Rab30 (Rsb30)            | 0  | 53  | 0  | 4  |
|                      | Q8CG50 | Ras-related protein Rab-43                                                                                                                                   | Rab43                    | 0  | 53  | 0  | 4  |
|                      | P46638 | Ras-related protein Rab-11B                                                                                                                                  | Rab11b                   | 0  | 49  | 0  | 4  |
|                      | Q8BHD0 | Ras-related protein Rab-39A (Rab-39)                                                                                                                         | Rab39 (Rab39a)           | 0  | 53  | 0  | 4  |
|                      | Q8BHC1 | Ras-related protein Rab-39B                                                                                                                                  | Rab39b                   | 0  | 53  | 0  | 5  |
|                      | P14211 | Calreticulin (CRP55) (Calregulin) (HACBP) (ERp60)                                                                                                            | Calr                     | 0  | 120 | 0  | 7  |
|                      | P50396 | Rab GDP dissociation inhibitor alpha (Rab GDI alpha) (Guanosine diphosphate dissociation inhibitor 1) (GDI-1)                                                | Gdi1 (Rabgdia)           | 0  | 56  | 0  | 7  |
|                      | Q9D1G1 | Ras-related protein Rab-1B                                                                                                                                   | Rab1b                    | 0  | 91  | 0  | 8  |
|                      | P35279 | Ras-related protein Rab-6A (Rab-6)                                                                                                                           | Rab6a (Rab6) (MNCb-1660) | 0  | 76  | 0  | 9  |
|                      | Q8BSL7 | ADP-ribosylation factor 2                                                                                                                                    | Arf2                     | 0  | 270 | 0  | 10 |

|                   |        |                                                                                                                                                                       |                                  |    |     |    |    |
|-------------------|--------|-----------------------------------------------------------------------------------------------------------------------------------------------------------------------|----------------------------------|----|-----|----|----|
|                   | P35283 | Ras-related protein Rab-12 (Rab-13)                                                                                                                                   | Rab12                            | 0  | 53  | 0  | 11 |
|                   | P35276 | Ras-related protein Rab-3D                                                                                                                                            | Rab3d                            | 0  | 53  | 0  | 11 |
|                   | Q60875 | Rho guanine nucleotide exchange factor 2 (Guanine nucleotide exchange factor H1) (GEF-H1) (Lymphoid blast crisis-like 1) (LBC'S first cousin) (Oncogene LFC) (Rhobin) | Arhgef2 (Kiaa0651) (Lbcl1) (Lfc) | 0  | 31  | 0  | 12 |
|                   | P35235 | Tyrosine-protein phosphatase non-receptor type 11 (EC 3.1.3.48) (Protein-tyrosine phosphatase SYP) (SH-PTP2) (SHP-2) (Shp2)                                           | Ptpn11                           | 0  | 40  | 0  | 12 |
|                   | P84084 | ADP-ribosylation factor 5                                                                                                                                             | Arf5                             | 0  | 210 | 0  | 13 |
|                   | Q8R1U1 | Conserved oligomeric Golgi complex subunit 4 (COG complex subunit 4) (Component of oligomeric Golgi complex 4)                                                        | Cog4                             | 0  | 27  | 0  | 16 |
|                   | Q80U72 | Protein LAP4 (Protein scribble homolog)                                                                                                                               | Scrib (Kiaa0147) (Lap4) (Scrib1) | 0  | 29  | 0  | 22 |
|                   | Q91ZD4 | Vang-like protein 2 (Van Gogh-like protein 2) (Loop-tail-associated protein) (Loop-tail protein 1)                                                                    | Vangl2 (Lpp1) (Ltap)             | 0  | 27  | 0  | 31 |
|                   | P61750 | ADP-ribosylation factor 4                                                                                                                                             | Arf4                             | 21 | 56  | 2  | 8  |
|                   | P35278 | Ras-related protein Rab-5C                                                                                                                                            | Rab5c                            | 60 | 79  | 4  | 12 |
|                   | P61205 | ADP-ribosylation factor 3                                                                                                                                             | Arf3                             | 32 | 423 | 6  | 17 |
|                   | Q99PW8 | Kinesin-like protein KIF17 (MmKIF17)                                                                                                                                  | Kif17                            | 24 | 44  | 13 | 35 |
|                   | Q61037 | Tuberin (Tuberous sclerosis 2 homolog protein)                                                                                                                        | Tsc2                             | 22 | 46  | 38 | 91 |
|                   | O55029 | Coatomer subunit beta' (Beta'-coat protein) (Beta'-COP) (p102)                                                                                                        | Copb2                            | 48 | 31  | 4  | 8  |
| secretory pathway | P62823 | Ras-related protein Rab-3C                                                                                                                                            | Rab3c                            | 0  | 53  | 0  | 2  |
|                   | Q504M8 | Ras-related protein Rab-26                                                                                                                                            | Rab26                            | 0  | 53  | 0  | 3  |
|                   | P63011 | Ras-related protein Rab-3A                                                                                                                                            | Rab3a                            | 0  | 53  | 0  | 3  |
|                   | Q9CZT8 | Ras-related protein Rab-3B                                                                                                                                            | Rab3b                            | 0  | 53  | 0  | 3  |
|                   | P35279 | Ras-related protein Rab-6A (Rab-6)                                                                                                                                    | Rab6a (Rab6) (MNCb-1660)         | 0  | 76  | 0  | 9  |
|                   | Q8BSL7 | ADP-ribosylation factor 2                                                                                                                                             | Arf2                             | 0  | 270 | 0  | 10 |

|                   |                               |                                                                                                                                              |                                |        |     |    |    |
|-------------------|-------------------------------|----------------------------------------------------------------------------------------------------------------------------------------------|--------------------------------|--------|-----|----|----|
|                   | P35276                        | Ras-related protein Rab-3D                                                                                                                   | Rab3d                          | 0      | 53  | 0  | 11 |
|                   | P84084                        | ADP-ribosylation factor 5                                                                                                                    | Arf5                           | 0      | 210 | 0  | 13 |
|                   | P61750                        | ADP-ribosylation factor 4                                                                                                                    | Arf4                           | 21     | 56  | 2  | 8  |
|                   | P61205                        | ADP-ribosylation factor 3                                                                                                                    | Arf3                           | 32     | 423 | 6  | 17 |
|                   | Q8R1B5                        | Complexin-3 (Complexin III) (CPX III)                                                                                                        | Cplx3                          | 16     | 29  | 2  | 4  |
|                   | O55029                        | Coatomer subunit beta' (Beta'-coat protein) (Beta'-COP) (p102)                                                                               | Copb2                          | 48     | 31  | 4  | 8  |
| secretion by cell | P62823                        | Ras-related protein Rab-3C                                                                                                                   | Rab3c                          | 0      | 53  | 0  | 2  |
|                   | Q504M8                        | Ras-related protein Rab-26                                                                                                                   | Rab26                          | 0      | 53  | 0  | 3  |
|                   | P63011                        | Ras-related protein Rab-3A                                                                                                                   | Rab3a                          | 0      | 53  | 0  | 3  |
|                   | Q9CZT8                        | Ras-related protein Rab-3B                                                                                                                   | Rab3b                          | 0      | 53  | 0  | 3  |
|                   | P35279                        | Ras-related protein Rab-6A (Rab-6)                                                                                                           | Rab6a<br>(Rab6)<br>(MNCb-1660) | 0      | 76  | 0  | 9  |
|                   | Q8BSL7                        | ADP-ribosylation factor 2                                                                                                                    | Arf2                           | 0      | 270 | 0  | 10 |
|                   | P35276                        | Ras-related protein Rab-3D                                                                                                                   | Rab3d                          | 0      | 53  | 0  | 11 |
|                   | P84084                        | ADP-ribosylation factor 5                                                                                                                    | Arf5                           | 0      | 210 | 0  | 13 |
|                   | P61750                        | ADP-ribosylation factor 4                                                                                                                    | Arf4                           | 21     | 56  | 2  | 8  |
|                   | P61205                        | ADP-ribosylation factor 3                                                                                                                    | Arf3                           | 32     | 423 | 6  | 17 |
|                   | Q8R1B5                        | Complexin-3 (Complexin III) (CPX III)                                                                                                        | Cplx3                          | 16     | 29  | 2  | 4  |
|                   | O55029                        | Coatomer subunit beta' (Beta'-coat protein) (Beta'-COP) (p102)                                                                               | Copb2                          | 48     | 31  | 4  | 8  |
|                   | establishment of localization | O35963                                                                                                                                       | Ras-related protein Rab-33B    | Rab33b | 0   | 53 | 0  |
| Q91V41            |                               | Ras-related protein Rab-14                                                                                                                   | Rab14                          | 0      | 53  | 0  | 2  |
| Q9JKM7            |                               | Ras-related protein Rab-37                                                                                                                   | Rab37                          | 0      | 53  | 0  | 2  |
| P62823            |                               | Ras-related protein Rab-3C                                                                                                                   | Rab3c                          | 0      | 53  | 0  | 2  |
| O70492            |                               | Sorting nexin-3 (SDP3 protein)                                                                                                               | Snx3                           | 0      | 54  | 0  | 2  |
| P14231            |                               | Sodium/potassium-transporting ATPase subunit beta-2 (Sodium/potassium-dependent ATPase subunit beta-2) (Glial cell adhesion molecule) (AMOG) | Atp1b2                         | 0      | 26  | 0  | 3  |
| P11404            |                               | Fatty acid-binding protein, heart (Heart-type fatty acid-binding protein) (H-FABP) (Mammary-derived growth inhibitor) (MDGI)                 | Fabp3<br>(Fabph1)              | 0      | 25  | 0  | 3  |
| P61027            |                               | Ras-related protein Rab-10                                                                                                                   | Rab10                          | 0      | 82  | 0  | 3  |

|        |                                                                                                                                                                       |                                      |   |     |   |   |
|--------|-----------------------------------------------------------------------------------------------------------------------------------------------------------------------|--------------------------------------|---|-----|---|---|
| Q504M8 | Ras-related protein Rab-26                                                                                                                                            | Rab26                                | 0 | 53  | 0 | 3 |
| P63011 | Ras-related protein Rab-3A                                                                                                                                            | Rab3a                                | 0 | 53  | 0 | 3 |
| Q9CZT8 | Ras-related protein Rab-3B                                                                                                                                            | Rab3b                                | 0 | 53  | 0 | 3 |
| P62746 | Rho-related GTP-binding protein RhoB                                                                                                                                  | Rhob<br>(Arhb)                       | 0 | 82  | 0 | 3 |
| Q8CDN6 | Thioredoxin-like protein 1 (32 kDa thioredoxin-related protein)                                                                                                       | Txn11<br>(Trp32)<br>(Txnl)           | 0 | 173 | 0 | 3 |
| P26883 | Peptidyl-prolyl cis-trans isomerase FKBP1A (PPIase FKBP1A) (EC 5.2.1.8) (FK506-binding protein 1A) (FKBP-1A) (Rotamase) (Immunophilin FKBP12) (12 kDa FKBP) (FKBP-12) | Fkbp1a<br>(Fkbp1)                    | 0 | 55  | 0 | 4 |
| Q61792 | LIM and SH3 domain protein 1 (LASP-1) (MLN 50)                                                                                                                        | Lasp1<br>(Mln50)                     | 0 | 72  | 0 | 4 |
| Q62048 | Astrocytic phosphoprotein PEA-15                                                                                                                                      | Pea15<br>(Pea15a)                    | 0 | 38  | 0 | 4 |
| Q923S9 | Ras-related protein Rab-30                                                                                                                                            | Rab30<br>(Rsb30)                     | 0 | 53  | 0 | 4 |
| Q8CG50 | Ras-related protein Rab-43                                                                                                                                            | Rab43                                | 0 | 53  | 0 | 4 |
| P46638 | Ras-related protein Rab-11B                                                                                                                                           | Rab11b                               | 0 | 49  | 0 | 4 |
| Q8BHD0 | Ras-related protein Rab-39A (Rab-39)                                                                                                                                  | Rab39<br>(Rab39a)                    | 0 | 53  | 0 | 4 |
| Q8BWG9 | Calcium release-activated calcium channel protein 1 (Protein orai-1) (Transmembrane protein 142A)                                                                     | Orai1<br>(Cracm1)<br>(Tmem14<br>2a)  | 0 | 33  | 0 | 5 |
| Q8BHC1 | Ras-related protein Rab-39B                                                                                                                                           | Rab39b                               | 0 | 53  | 0 | 5 |
| P10107 | Annexin A1 (Annexin-1) (Annexin I) (Lipocortin I) (Calpactin II) (Chromobindin-9) (p35) (Phospholipase A2 inhibitory protein)                                         | Anxa1<br>(Anx1)<br>(Lpc-1)<br>(Lpc1) | 0 | 26  | 0 | 6 |
| P14211 | Calreticulin (CRP55) (Calregulin) (HACBP) (ERp60)                                                                                                                     | Calr                                 | 0 | 120 | 0 | 7 |

|        |                                                                                                                                                                        |                                  |   |     |   |    |
|--------|------------------------------------------------------------------------------------------------------------------------------------------------------------------------|----------------------------------|---|-----|---|----|
| P50396 | Rab GDP dissociation inhibitor alpha (Rab GDI alpha) (Guanosine diphosphate dissociation inhibitor 1) (GDI-1)                                                          | Gdi1 (Rabgdia)                   | 0 | 56  | 0 | 7  |
| P35922 | Fragile X mental retardation protein 1 homolog (Protein FMR-1) (FMRP) (mFmr1p)                                                                                         | Fmr1 (Fmr-1)                     | 0 | 36  | 0 | 8  |
| Q9R1P4 | Proteasome subunit alpha type-1 (EC 3.4.25.1) (Proteasome component C2) (Macropain subunit C2) (Multicatalytic endopeptidase complex subunit C2) (Proteasome nu chain) | Psm1                             | 0 | 95  | 0 | 8  |
| Q9D1G1 | Ras-related protein Rab-1B                                                                                                                                             | Rab1b                            | 0 | 91  | 0 | 8  |
| P35279 | Ras-related protein Rab-6A (Rab-6)                                                                                                                                     | Rab6a (Rab6) (MNCb-1660)         | 0 | 76  | 0 | 9  |
| P57780 | Alpha-actinin-4 (Non-muscle alpha-actinin 4) (F-actin cross-linking protein)                                                                                           | Actn4                            | 0 | 34  | 0 | 10 |
| Q8BSL7 | ADP-ribosylation factor 2                                                                                                                                              | Arf2                             | 0 | 270 | 0 | 10 |
| P35283 | Ras-related protein Rab-12 (Rab-13)                                                                                                                                    | Rab12                            | 0 | 53  | 0 | 11 |
| P35276 | Ras-related protein Rab-3D                                                                                                                                             | Rab3d                            | 0 | 53  | 0 | 11 |
| Q60875 | Rho guanine nucleotide exchange factor 2 (Guanine nucleotide exchange factor H1) (GEF-H1) (Lymphoid blast crisis-like 1) (LBC'S first cousin) (Oncogene LFC) (Rhobin)  | Arhgef2 (Kiaa0651) (Lbcl1) (Lfc) | 0 | 31  | 0 | 12 |
| Q8BPU7 | Engulfment and cell motility protein 1 (CED-12 homolog)                                                                                                                | Elmo1                            | 0 | 64  | 0 | 12 |
| P35235 | Tyrosine-protein phosphatase non-receptor type 11 (EC 3.1.3.48) (Protein-tyrosine phosphatase SYP) (SH-PTP2) (SHP-2) (Shp2)                                            | Ptpn11                           | 0 | 40  | 0 | 12 |
| P84084 | ADP-ribosylation factor 5                                                                                                                                              | Arf5                             | 0 | 210 | 0 | 13 |
| P97855 | Ras GTPase-activating protein-binding protein 1 (EC 3.6.1.-) (G3BP-1) (ATP-dependent DNA helicase VIII) (HDH-VIII) (GAP SH3 domain-binding protein 1)                  | G3bp1 (G3bp)                     | 0 | 75  | 0 | 15 |
| P28738 | Kinesin heavy chain isoform 5C (Kinesin heavy chain neuron-specific 2)                                                                                                 | Kif5c (Nkhc2)                    | 0 | 66  | 0 | 15 |

|        |                                                                                                                                                                                                                                          |                                 |    |     |    |    |
|--------|------------------------------------------------------------------------------------------------------------------------------------------------------------------------------------------------------------------------------------------|---------------------------------|----|-----|----|----|
| P35438 | Glutamate [NMDA] receptor subunit zeta-1 (N-methyl-D-aspartate receptor subunit NR1)                                                                                                                                                     | Grin1 (Glurz1)                  | 0  | 27  | 0  | 15 |
| Q8R1U1 | Conserved oligomeric Golgi complex subunit 4 (COG complex subunit 4) (Component of oligomeric Golgi complex 4)                                                                                                                           | Cog4                            | 0  | 27  | 0  | 16 |
| P08071 | Lactotransferrin (Lactoferrin) (EC 3.4.21.-)                                                                                                                                                                                             | Ltf                             | 0  | 25  | 0  | 16 |
| P33175 | Kinesin heavy chain isoform 5A (Neuronal kinesin heavy chain) (NKHC) (Kinesin heavy chain neuron-specific 1)                                                                                                                             | Kif5a (Kiaa4086) (Kif5) (Nkhc1) | 0  | 66  | 0  | 20 |
| Q9QXL2 | Kinesin-like protein KIF21A                                                                                                                                                                                                              | Kif21a (Kiaa1708)               | 0  | 45  | 0  | 23 |
| Q9WVL3 | Solute carrier family 12 member 7 (Electroneutral potassium-chloride cotransporter 4) (K-Cl cotransporter 4)                                                                                                                             | Slc12a7 (Kcc4)                  | 0  | 27  | 0  | 24 |
| O08532 | Voltage-dependent calcium channel subunit alpha-2/delta-1 (Voltage-gated calcium channel subunit alpha-2/delta-1) [Cleaved into: Voltage-dependent calcium channel subunit alpha-2-1; Voltage-dependent calcium channel subunit delta-1] | Cacna2d1 (Cacna2)               | 0  | 25  | 0  | 26 |
| P61750 | ADP-ribosylation factor 4                                                                                                                                                                                                                | Arf4                            | 21 | 56  | 2  | 8  |
| P35278 | Ras-related protein Rab-5C                                                                                                                                                                                                               | Rab5c                           | 60 | 79  | 4  | 12 |
| P61205 | ADP-ribosylation factor 3                                                                                                                                                                                                                | Arf3                            | 32 | 423 | 6  | 17 |
| Q99PW8 | Kinesin-like protein KIF17 (MmKIF17)                                                                                                                                                                                                     | Kif17                           | 24 | 44  | 13 | 35 |
| Q61037 | Tuberin (Tuberous sclerosis 2 homolog protein)                                                                                                                                                                                           | Tsc2                            | 22 | 46  | 38 | 91 |
| O35066 | Kinesin-like protein KIF3C                                                                                                                                                                                                               | Kif3c                           | 23 | 37  | 8  | 18 |
| Q9R244 | Short transient receptor potential channel 2 (TrpC2) (Transient receptor protein 2) (TRP-2) (mTrp2)                                                                                                                                      | Trpc2 (Trp2) (Trrp2)            | 25 | 55  | 45 | 92 |
| Q8R1B5 | Complexin-3 (Complexin III) (CPX III)                                                                                                                                                                                                    | Cplx3                           | 16 | 29  | 2  | 4  |
| O35239 | Tyrosine-protein phosphatase non-receptor type 9 (EC 3.1.3.48) (Protein-tyrosine phosphatase MEG2) (PTPase-MEG2)                                                                                                                         | Ptpn9                           | 17 | 29  | 2  | 4  |

|           |        |                                                                                                                                                              |                         |     |     |    |    |
|-----------|--------|--------------------------------------------------------------------------------------------------------------------------------------------------------------|-------------------------|-----|-----|----|----|
|           | Q9R155 | Pendrin (Sodium-independent chloride/iodide transporter) (Solute carrier family 26 member 4)                                                                 | Slc26a4 (Pds)           | 32  | 18  | 3  | 6  |
|           | O55029 | Coatomer subunit beta' (Beta'-coat protein) (Beta'-COP) (p102)                                                                                               | Copb2                   | 48  | 31  | 4  | 8  |
|           | P34022 | Ran-specific GTPase-activating protein (Ran-binding protein 1) (RANBP1) (HpaII tiny fragments locus 9a protein)                                              | Ranbp1 (Htf9-a) (Htf9a) | 49  | 24  | 5  | 10 |
|           | Q9WTR1 | Transient receptor potential cation channel subfamily V member 2 (TrpV2) (Osm-9-like TRP channel 2) (OTRPC2) (Growth factor-regulated calcium channel) (GRC) | Trpv2 (Grc)             | 22  | 30  | 5  | 10 |
|           | Q9JJZ2 | Tubulin alpha-8 chain (Alpha-tubulin 8)                                                                                                                      | Tuba8                   | 428 | 841 | 25 | 50 |
| transport | O35963 | Ras-related protein Rab-33B                                                                                                                                  | Rab33b                  | 0   | 53  | 0  | 1  |
|           | Q91V41 | Ras-related protein Rab-14                                                                                                                                   | Rab14                   | 0   | 53  | 0  | 2  |
|           | Q9JKM7 | Ras-related protein Rab-37                                                                                                                                   | Rab37                   | 0   | 53  | 0  | 2  |
|           | P62823 | Ras-related protein Rab-3C                                                                                                                                   | Rab3c                   | 0   | 53  | 0  | 2  |
|           | O70492 | Sorting nexin-3 (SDP3 protein)                                                                                                                               | Snx3                    | 0   | 54  | 0  | 2  |
|           | P14231 | Sodium/potassium-transporting ATPase subunit beta-2 (Sodium/potassium-dependent ATPase subunit beta-2) (Glial cell adhesion molecule) (AMOG)                 | Atp1b2                  | 0   | 26  | 0  | 3  |
|           | P11404 | Fatty acid-binding protein, heart (Heart-type fatty acid-binding protein) (H-FABP) (Mammary-derived growth inhibitor) (MDGI)                                 | Fabp3 (Fabph1)          | 0   | 25  | 0  | 3  |
|           | P61027 | Ras-related protein Rab-10                                                                                                                                   | Rab10                   | 0   | 82  | 0  | 3  |
|           | Q504M8 | Ras-related protein Rab-26                                                                                                                                   | Rab26                   | 0   | 53  | 0  | 3  |
|           | P63011 | Ras-related protein Rab-3A                                                                                                                                   | Rab3a                   | 0   | 53  | 0  | 3  |
|           | Q9CZT8 | Ras-related protein Rab-3B                                                                                                                                   | Rab3b                   | 0   | 53  | 0  | 3  |
|           | P62746 | Rho-related GTP-binding protein RhoB                                                                                                                         | Rhob (Arhb)             | 0   | 82  | 0  | 3  |
|           | Q8CDN6 | Thioredoxin-like protein 1 (32 kDa thioredoxin-related protein)                                                                                              | Txn11 (Trp32) (Txnl)    | 0   | 173 | 0  | 3  |

|        |                                                                                                                                                                        |                            |   |     |   |   |
|--------|------------------------------------------------------------------------------------------------------------------------------------------------------------------------|----------------------------|---|-----|---|---|
| P26883 | Peptidyl-prolyl cis-trans isomerase FKBP1A (PPlase FKBP1A) (EC 5.2.1.8) (FK506-binding protein 1A) (FKBP-1A) (Rotamase) (Immunophilin FKBP12) (12 kDa FKBP) (FKBP-12)  | Fkbp1a (Fkbp1)             | 0 | 55  | 0 | 4 |
| Q61792 | LIM and SH3 domain protein 1 (LASP-1) (MLN 50)                                                                                                                         | Lasp1 (Mln50)              | 0 | 72  | 0 | 4 |
| Q62048 | Astrocytic phosphoprotein PEA-15                                                                                                                                       | Pea15 (Pea15a)             | 0 | 38  | 0 | 4 |
| Q923S9 | Ras-related protein Rab-30                                                                                                                                             | Rab30 (Rsb30)              | 0 | 53  | 0 | 4 |
| Q8CG50 | Ras-related protein Rab-43                                                                                                                                             | Rab43                      | 0 | 53  | 0 | 4 |
| P46638 | Ras-related protein Rab-11B                                                                                                                                            | Rab11b                     | 0 | 49  | 0 | 4 |
| Q8BHD0 | Ras-related protein Rab-39A (Rab-39)                                                                                                                                   | Rab39 (Rab39a)             | 0 | 53  | 0 | 4 |
| Q8BWG9 | Calcium release-activated calcium channel protein 1 (Protein orai-1) (Transmembrane protein 142A)                                                                      | Orai1 (Cracm1) (Tmem14 2a) | 0 | 33  | 0 | 5 |
| Q8BHC1 | Ras-related protein Rab-39B                                                                                                                                            | Rab39b                     | 0 | 53  | 0 | 5 |
| P14211 | Calreticulin (CRP55) (Calregulin) (HACBP) (ERp60)                                                                                                                      | Calr                       | 0 | 120 | 0 | 7 |
| P50396 | Rab GDP dissociation inhibitor alpha (Rab GDI alpha) (Guanosine diphosphate dissociation inhibitor 1) (GDI-1)                                                          | Gdi1 (Rabgdia)             | 0 | 56  | 0 | 7 |
| P35922 | Fragile X mental retardation protein 1 homolog (Protein FMR-1) (FMRP) (mFmr1p)                                                                                         | Fmr1 (Fmr-1)               | 0 | 36  | 0 | 8 |
| Q9R1P4 | Proteasome subunit alpha type-1 (EC 3.4.25.1) (Proteasome component C2) (Macropain subunit C2) (Multicatalytic endopeptidase complex subunit C2) (Proteasome nu chain) | Psm1                       | 0 | 95  | 0 | 8 |
| Q9D1G1 | Ras-related protein Rab-1B                                                                                                                                             | Rab1b                      | 0 | 91  | 0 | 8 |
| P35279 | Ras-related protein Rab-6A (Rab-6)                                                                                                                                     | Rab6a (Rab6) (MNCb-1660)   | 0 | 76  | 0 | 9 |



|        |                                                                                                                                                                       |                                 |   |     |   |    |
|--------|-----------------------------------------------------------------------------------------------------------------------------------------------------------------------|---------------------------------|---|-----|---|----|
| P57780 | Alpha-actinin-4 (Non-muscle alpha-actinin 4) (F-actin cross-linking protein)                                                                                          | Actn4                           | 0 | 34  | 0 | 10 |
| Q8BSL7 | ADP-ribosylation factor 2                                                                                                                                             | Arf2                            | 0 | 270 | 0 | 10 |
| P35283 | Ras-related protein Rab-12 (Rab-13)                                                                                                                                   | Rab12                           | 0 | 53  | 0 | 11 |
| P35276 | Ras-related protein Rab-3D                                                                                                                                            | Rab3d                           | 0 | 53  | 0 | 11 |
| Q60875 | Rho guanine nucleotide exchange factor 2 (Guanine nucleotide exchange factor H1) (GEF-H1) (Lymphoid blast crisis-like 1) (LBC'S first cousin) (Oncogene LFC) (Rhobin) | Arhgef2 (Kiaa0651) (Lbc1) (Lfc) | 0 | 31  | 0 | 12 |
| Q8BPU7 | Engulfment and cell motility protein 1 (CED-12 homolog)                                                                                                               | Elmo1                           | 0 | 64  | 0 | 12 |
| P35235 | Tyrosine-protein phosphatase non-receptor type 11 (EC 3.1.3.48) (Protein-tyrosine phosphatase SYP) (SH-PTP2) (SHP-2) (Shp2)                                           | Ptpn11                          | 0 | 40  | 0 | 12 |
| P84084 | ADP-ribosylation factor 5                                                                                                                                             | Arf5                            | 0 | 210 | 0 | 13 |
| P97855 | Ras GTPase-activating protein-binding protein 1 (EC 3.6.1.-) (G3BP-1) (ATP-dependent DNA helicase VIII) (HDH-VIII) (GAP SH3 domain-binding protein 1)                 | G3bp1 (G3bp)                    | 0 | 75  | 0 | 15 |
| P28738 | Kinesin heavy chain isoform 5C (Kinesin heavy chain neuron-specific 2)                                                                                                | Kif5c (Nkhc2)                   | 0 | 66  | 0 | 15 |
| P35438 | Glutamate [NMDA] receptor subunit zeta-1 (N-methyl-D-aspartate receptor subunit NR1)                                                                                  | Grin1 (Glurz1)                  | 0 | 27  | 0 | 15 |
| Q8R1U1 | Conserved oligomeric Golgi complex subunit 4 (COG complex subunit 4) (Component of oligomeric Golgi complex 4)                                                        | Cog4                            | 0 | 27  | 0 | 16 |
| P08071 | Lactotransferrin (Lactoferrin) (EC 3.4.21.-)                                                                                                                          | Ltf                             | 0 | 25  | 0 | 16 |
| P33175 | Kinesin heavy chain isoform 5A (Neuronal kinesin heavy chain) (NKHC) (Kinesin heavy chain neuron-specific 1)                                                          | Kif5a (Kiaa4086) (Kif5) (Nkhc1) | 0 | 66  | 0 | 20 |
| Q9QXL2 | Kinesin-like protein KIF21A                                                                                                                                           | Kif21a (Kiaa1708)               | 0 | 45  | 0 | 23 |

|        |                                                                                                                                                                                                                                          |                         |     |     |    |    |
|--------|------------------------------------------------------------------------------------------------------------------------------------------------------------------------------------------------------------------------------------------|-------------------------|-----|-----|----|----|
| Q9WVL3 | Solute carrier family 12 member 7 (Electroneutral potassium-chloride cotransporter 4) (K-Cl cotransporter 4)                                                                                                                             | Slc12a7 (Kcc4)          | 0   | 27  | 0  | 24 |
| O08532 | Voltage-dependent calcium channel subunit alpha-2/delta-1 (Voltage-gated calcium channel subunit alpha-2/delta-1) [Cleaved into: Voltage-dependent calcium channel subunit alpha-2-1; Voltage-dependent calcium channel subunit delta-1] | Cacna2d1 (Cacna2)       | 0   | 25  | 0  | 26 |
| P61750 | ADP-ribosylation factor 4                                                                                                                                                                                                                | Arf4                    | 21  | 56  | 2  | 8  |
| P35278 | Ras-related protein Rab-5C                                                                                                                                                                                                               | Rab5c                   | 60  | 79  | 4  | 12 |
| P61205 | ADP-ribosylation factor 3                                                                                                                                                                                                                | Arf3                    | 32  | 423 | 6  | 17 |
| Q99PW8 | Kinesin-like protein KIF17 (MmKIF17)                                                                                                                                                                                                     | Kif17                   | 24  | 44  | 13 | 35 |
| Q61037 | Tuberin (Tuberous sclerosis 2 homolog protein)                                                                                                                                                                                           | Tsc2                    | 22  | 46  | 38 | 91 |
| O35066 | Kinesin-like protein KIF3C                                                                                                                                                                                                               | Kif3c                   | 23  | 37  | 8  | 18 |
| Q9R244 | Short transient receptor potential channel 2 (TrpC2) (Transient receptor protein 2) (TRP-2) (mTrp2)                                                                                                                                      | Trpc2 (Trp2) (Trrp2)    | 25  | 55  | 45 | 92 |
| Q8R1B5 | Complexin-3 (Complexin III) (CPX III)                                                                                                                                                                                                    | Cplx3                   | 16  | 29  | 2  | 4  |
| O35239 | Tyrosine-protein phosphatase non-receptor type 9 (EC 3.1.3.48) (Protein-tyrosine phosphatase MEG2) (PTPase-MEG2)                                                                                                                         | Ptpn9                   | 17  | 29  | 2  | 4  |
| Q9R155 | Pendrin (Sodium-independent chloride/iodide transporter) (Solute carrier family 26 member 4)                                                                                                                                             | Slc26a4 (Pds)           | 32  | 18  | 3  | 6  |
| O55029 | Coatomer subunit beta' (Beta'-coat protein) (Beta'-COP) (p102)                                                                                                                                                                           | Copb2                   | 48  | 31  | 4  | 8  |
| P34022 | Ran-specific GTPase-activating protein (Ran-binding protein 1) (RANBP1) (Hpal1 tiny fragments locus 9a protein)                                                                                                                          | Ranbp1 (Htf9-a) (Htf9a) | 49  | 24  | 5  | 10 |
| Q9WTR1 | Transient receptor potential cation channel subfamily V member 2 (TrpV2) (Osm-9-like TRP channel 2) (OTRPC2) (Growth factor-regulated calcium channel) (GRC)                                                                             | Trpv2 (Grc)             | 22  | 30  | 5  | 10 |
| Q9JJZ2 | Tubulin alpha-8 chain (Alpha-tubulin 8)                                                                                                                                                                                                  | Tuba8                   | 428 | 841 | 25 | 50 |

|                                  |        |                                                                                                                                                                                                       |                          |   |     |   |    |
|----------------------------------|--------|-------------------------------------------------------------------------------------------------------------------------------------------------------------------------------------------------------|--------------------------|---|-----|---|----|
| regulation of biological quality | Q8CDN6 | Thioredoxin-like protein 1 (32 kDa thioredoxin-related protein)                                                                                                                                       | Txn11 (Trp32) (Txnl)     | 0 | 173 | 0 | 3  |
|                                  | P70677 | Caspase-3 (CASP-3) (EC 3.4.22.56) (Apopain) (Cysteine protease CPP32) (CPP-32) (Yama protein) (SREBP cleavage activity 1) (SCA-1) (LICE) [Cleaved into: Caspase-3 subunit p17; Caspase-3 subunit p12] | Casp3 (Cp32)             | 0 | 29  | 0 | 5  |
|                                  | Q60668 | Heterogeneous nuclear ribonucleoprotein D0 (hnRNP D0) (AU-rich element RNA-binding protein 1)                                                                                                         | Hnrnpd (Auf1) (Hnrpd)    | 0 | 34  | 0 | 5  |
|                                  | P09103 | Protein disulfide-isomerase (PDI) (EC 5.3.4.1) (Prolyl 4-hydroxylase subunit beta) (Cellular thyroid hormone-binding protein) (p55) (Erp59)                                                           | P4hb (Pdia1)             | 0 | 28  | 0 | 5  |
|                                  | P63330 | Serine/threonine-protein phosphatase 2A catalytic subunit alpha isoform (PP2A-alpha) (EC 3.1.3.16)                                                                                                    | Ppp2ca                   | 0 | 101 | 0 | 6  |
|                                  | Q715T0 | Thioredoxin domain-containing protein 3 (Spermatid-specific thioredoxin-2) (Sptrx-2)                                                                                                                  | Txndc3 (Sptrx2)          | 0 | 25  | 0 | 7  |
|                                  | Q9DAR7 | Scavenger mRNA-decapping enzyme DcpS (EC 3.-.-.) (DCS-1) (Hint-related 7meGMP-directed hydrolase) (Histidine triad protein member 5) (HINT-5)                                                         | Dcps (Dcs1) (Hint5)      | 0 | 76  | 0 | 8  |
|                                  | P07356 | Annexin A2 (Annexin-2) (Annexin II) (Lipocortin II) (Calpactin I heavy chain) (Chromobindin-8) (p36) (Protein I) (Placental anticoagulant protein IV) (PAP-IV)                                        | Anxa2 (Anx2) (Cal1h)     | 0 | 51  | 0 | 9  |
|                                  | P60762 | Mortality factor 4-like protein 1 (MORF-related gene 15 protein) (Transcription factor-like protein MRG15) (Testis-expressed gene 189 protein)                                                        | Morf4l1 (Mrg15) (Tex189) | 0 | 33  | 0 | 9  |
|                                  | P35235 | Tyrosine-protein phosphatase non-receptor type 11 (EC 3.1.3.48) (Protein-tyrosine phosphatase SYP) (SH-PTP2) (SHP-2) (Shp2)                                                                           | Ptpn11                   | 0 | 40  | 0 | 12 |

|                            |        |                                                                                                                                                                                                                                                                      |                             |    |     |    |    |
|----------------------------|--------|----------------------------------------------------------------------------------------------------------------------------------------------------------------------------------------------------------------------------------------------------------------------|-----------------------------|----|-----|----|----|
|                            | P27773 | Protein disulfide-isomerase A3 (EC 5.3.4.1) (Disulfide isomerase ER-60) (ERp60) (58 kDa microsomal protein) (p58) (ERp57)                                                                                                                                            | Pdia3 (Erp) (Erp60) (Grp58) | 0  | 98  | 0  | 14 |
|                            | P35438 | Glutamate [NMDA] receptor subunit zeta-1 (N-methyl-D-aspartate receptor subunit NR1)                                                                                                                                                                                 | Grin1 (Glurz1)              | 0  | 27  | 0  | 15 |
|                            | P08071 | Lactotransferrin (Lactoferrin) (EC 3.4.21.-)                                                                                                                                                                                                                         | Ltf                         | 0  | 25  | 0  | 16 |
|                            | P35918 | Vascular endothelial growth factor receptor 2 (VEGFR-2) (EC 2.7.10.1) (Protein-tyrosine kinase receptor flk-1) (Fetal liver kinase 1) (Kinase NYK) (CD antigen CD309)                                                                                                | Kdr (Flk-1) (Flk1)          | 0  | 34  | 0  | 16 |
|                            | Q62468 | Villin-1                                                                                                                                                                                                                                                             | Vil1 (Vil)                  | 0  | 26  | 0  | 22 |
|                            | Q9CQM9 | Glutaredoxin-3 (Thioredoxin-like protein 2) (PKC-interacting cousin of thioredoxin) (PKC-theta-interacting protein) (PKCq-interacting protein)                                                                                                                       | Glrx3 (Picot) (Txnl2)       | 17 | 77  | 3  | 11 |
|                            | P48036 | Annexin A5 (Annexin-5) (Annexin V) (Lipocortin V) (Endonexin II) (Calphobindin I) (CBP-I) (Placental anticoagulant protein I) (PAP-I) (Placental anticoagulant protein 4) (PP4) (Thromboplastin inhibitor) (Vascular anticoagulant-alpha) (VAC-alpha) (Anchorin CII) | Anxa5 (Anx5)                | 36 | 202 | 5  | 16 |
|                            | Q61037 | Tuberin (Tuberous sclerosis 2 homolog protein)                                                                                                                                                                                                                       | Tsc2                        | 22 | 46  | 38 | 91 |
|                            | Q9R244 | Short transient receptor potential channel 2 (TrpC2) (Transient receptor protein 2) (TRP-2) (mTrp2)                                                                                                                                                                  | Trpc2 (Trp2) (Trrp2)        | 25 | 55  | 45 | 92 |
|                            | P47878 | Insulin-like growth factor-binding protein 3 (IGF-binding protein 3) (IGFBP-3) (IBP-3)                                                                                                                                                                               | Igfbp3 (Igfbp-3)            | 18 | 26  | 5  | 10 |
| vesicle-mediated transport | P62823 | Ras-related protein Rab-3C                                                                                                                                                                                                                                           | Rab3c                       | 0  | 53  | 0  | 2  |
|                            | Q504M8 | Ras-related protein Rab-26                                                                                                                                                                                                                                           | Rab26                       | 0  | 53  | 0  | 3  |
|                            | P63011 | Ras-related protein Rab-3A                                                                                                                                                                                                                                           | Rab3a                       | 0  | 53  | 0  | 3  |
|                            | Q9CZT8 | Ras-related protein Rab-3B                                                                                                                                                                                                                                           | Rab3b                       | 0  | 53  | 0  | 3  |
|                            | P62746 | Rho-related GTP-binding protein RhoB                                                                                                                                                                                                                                 | Rhob (Arhb)                 | 0  | 82  | 0  | 3  |

|              |        |                                                                                                                                              |                          |    |     |    |    |
|--------------|--------|----------------------------------------------------------------------------------------------------------------------------------------------|--------------------------|----|-----|----|----|
|              | P35279 | Ras-related protein Rab-6A (Rab-6)                                                                                                           | Rab6a (Rab6) (MNCb-1660) | 0  | 76  | 0  | 9  |
|              | P57780 | Alpha-actinin-4 (Non-muscle alpha-actinin 4) (F-actin cross-linking protein)                                                                 | Actn4                    | 0  | 34  | 0  | 10 |
|              | Q8BSL7 | ADP-ribosylation factor 2                                                                                                                    | Arf2                     | 0  | 270 | 0  | 10 |
|              | P35276 | Ras-related protein Rab-3D                                                                                                                   | Rab3d                    | 0  | 53  | 0  | 11 |
|              | Q8BPU7 | Engulfment and cell motility protein 1 (CED-12 homolog)                                                                                      | Elmo1                    | 0  | 64  | 0  | 12 |
|              | P84084 | ADP-ribosylation factor 5                                                                                                                    | Arf5                     | 0  | 210 | 0  | 13 |
|              | P61750 | ADP-ribosylation factor 4                                                                                                                    | Arf4                     | 21 | 56  | 2  | 8  |
|              | P35278 | Ras-related protein Rab-5C                                                                                                                   | Rab5c                    | 60 | 79  | 4  | 12 |
|              | P61205 | ADP-ribosylation factor 3                                                                                                                    | Arf3                     | 32 | 423 | 6  | 17 |
|              | Q99PW8 | Kinesin-like protein KIF17 (MmKIF17)                                                                                                         | Kif17                    | 24 | 44  | 13 | 35 |
|              | Q61037 | Tuberin (Tuberous sclerosis 2 homolog protein)                                                                                               | Tsc2                     | 22 | 46  | 38 | 91 |
|              | Q8R1B5 | Complexin-3 (Complexin III) (CPX III)                                                                                                        | Cplx3                    | 16 | 29  | 2  | 4  |
|              | O55029 | Coatamer subunit beta' (Beta'-coat protein) (Beta'-COP) (p102)                                                                               | Copb2                    | 48 | 31  | 4  | 8  |
| localization | O35963 | Ras-related protein Rab-33B                                                                                                                  | Rab33b                   | 0  | 53  | 0  | 1  |
|              | Q91V41 | Ras-related protein Rab-14                                                                                                                   | Rab14                    | 0  | 53  | 0  | 2  |
|              | Q9JKM7 | Ras-related protein Rab-37                                                                                                                   | Rab37                    | 0  | 53  | 0  | 2  |
|              | P62823 | Ras-related protein Rab-3C                                                                                                                   | Rab3c                    | 0  | 53  | 0  | 2  |
|              | O70492 | Sorting nexin-3 (SDP3 protein)                                                                                                               | Snx3                     | 0  | 54  | 0  | 2  |
|              | P14231 | Sodium/potassium-transporting ATPase subunit beta-2 (Sodium/potassium-dependent ATPase subunit beta-2) (Glial cell adhesion molecule) (AMOG) | Atp1b2                   | 0  | 26  | 0  | 3  |
|              | P11404 | Fatty acid-binding protein, heart (Heart-type fatty acid-binding protein) (H-FABP) (Mammary-derived growth inhibitor) (MDGI)                 | Fabp3 (Fabph1)           | 0  | 25  | 0  | 3  |
|              | P61027 | Ras-related protein Rab-10                                                                                                                   | Rab10                    | 0  | 82  | 0  | 3  |
|              | Q504M8 | Ras-related protein Rab-26                                                                                                                   | Rab26                    | 0  | 53  | 0  | 3  |
|              | P63011 | Ras-related protein Rab-3A                                                                                                                   | Rab3a                    | 0  | 53  | 0  | 3  |
|              | Q9CZT8 | Ras-related protein Rab-3B                                                                                                                   | Rab3b                    | 0  | 53  | 0  | 3  |

|        |                                                                                                                                                                       |                                      |   |     |   |   |
|--------|-----------------------------------------------------------------------------------------------------------------------------------------------------------------------|--------------------------------------|---|-----|---|---|
| P62746 | Rho-related GTP-binding protein RhoB                                                                                                                                  | Rhob<br>(Arhb)                       | 0 | 82  | 0 | 3 |
| Q8CDN6 | Thioredoxin-like protein 1 (32 kDa thioredoxin-related protein)                                                                                                       | Txn1<br>(Trp32)<br>(Txnl)            | 0 | 173 | 0 | 3 |
| P26883 | Peptidyl-prolyl cis-trans isomerase FKBP1A (PPIase FKBP1A) (EC 5.2.1.8) (FK506-binding protein 1A) (FKBP-1A) (Rotamase) (Immunophilin FKBP12) (12 kDa FKBP) (FKBP-12) | Fkbp1a<br>(Fkbp1)                    | 0 | 55  | 0 | 4 |
| Q61792 | LIM and SH3 domain protein 1 (LASP-1) (MLN 50)                                                                                                                        | Lasp1<br>(Mln50)                     | 0 | 72  | 0 | 4 |
| Q62048 | Astrocytic phosphoprotein PEA-15                                                                                                                                      | Pea15<br>(Pea15a)                    | 0 | 38  | 0 | 4 |
| Q923S9 | Ras-related protein Rab-30                                                                                                                                            | Rab30<br>(Rsb30)                     | 0 | 53  | 0 | 4 |
| Q8CG50 | Ras-related protein Rab-43                                                                                                                                            | Rab43                                | 0 | 53  | 0 | 4 |
| P46638 | Ras-related protein Rab-11B                                                                                                                                           | Rab11b                               | 0 | 49  | 0 | 4 |
| Q8BHD0 | Ras-related protein Rab-39A (Rab-39)                                                                                                                                  | Rab39<br>(Rab39a)                    | 0 | 53  | 0 | 4 |
| Q7TPD3 | Roundabout homolog 2                                                                                                                                                  | Robo2<br>(Kiaa1568)                  | 0 | 30  | 0 | 4 |
| Q8BWG9 | Calcium release-activated calcium channel protein 1 (Protein orai-1) (Transmembrane protein 142A)                                                                     | Orai1<br>(Cracm1)<br>(Tmem142a)      | 0 | 33  | 0 | 5 |
| Q8BHC1 | Ras-related protein Rab-39B                                                                                                                                           | Rab39b                               | 0 | 53  | 0 | 5 |
| P10107 | Annexin A1 (Annexin-1) (Annexin I) (Lipocortin I) (Calpactin II) (Chromobindin-9) (p35) (Phospholipase A2 inhibitory protein)                                         | Anxa1<br>(Anx1)<br>(Lpc-1)<br>(Lpc1) | 0 | 26  | 0 | 6 |
| P14211 | Calreticulin (CRP55) (Calregulin) (HACBP) (ERp60)                                                                                                                     | Calr                                 | 0 | 120 | 0 | 7 |

|        |                                                                                                                                                                        |                                  |   |     |   |    |
|--------|------------------------------------------------------------------------------------------------------------------------------------------------------------------------|----------------------------------|---|-----|---|----|
| P50396 | Rab GDP dissociation inhibitor alpha (Rab GDI alpha) (Guanosine diphosphate dissociation inhibitor 1) (GDI-1)                                                          | Gdi1 (Rabgdia)                   | 0 | 56  | 0 | 7  |
| Q7TPR4 | Alpha-actinin-1 (Alpha-actinin cytoskeletal isoform) (Non-muscle alpha-actinin-1) (F-actin cross-linking protein)                                                      | Actn1                            | 0 | 34  | 0 | 8  |
| P35922 | Fragile X mental retardation protein 1 homolog (Protein FMR-1) (FMRP) (mFmr1p)                                                                                         | Fmr1 (Fmr-1)                     | 0 | 36  | 0 | 8  |
| Q9R1P4 | Proteasome subunit alpha type-1 (EC 3.4.25.1) (Proteasome component C2) (Macropain subunit C2) (Multicatalytic endopeptidase complex subunit C2) (Proteasome nu chain) | Psma1                            | 0 | 95  | 0 | 8  |
| Q9D1G1 | Ras-related protein Rab-1B                                                                                                                                             | Rab1b                            | 0 | 91  | 0 | 8  |
| P35279 | Ras-related protein Rab-6A (Rab-6)                                                                                                                                     | Rab6a (Rab6) (MNCb-1660)         | 0 | 76  | 0 | 9  |
| P57780 | Alpha-actinin-4 (Non-muscle alpha-actinin 4) (F-actin cross-linking protein)                                                                                           | Actn4                            | 0 | 34  | 0 | 10 |
| Q8BSL7 | ADP-ribosylation factor 2                                                                                                                                              | Arf2                             | 0 | 270 | 0 | 10 |
| P35283 | Ras-related protein Rab-12 (Rab-13)                                                                                                                                    | Rab12                            | 0 | 53  | 0 | 11 |
| P35276 | Ras-related protein Rab-3D                                                                                                                                             | Rab3d                            | 0 | 53  | 0 | 11 |
| Q60875 | Rho guanine nucleotide exchange factor 2 (Guanine nucleotide exchange factor H1) (GEF-H1) (Lymphoid blast crisis-like 1) (LBC'S first cousin) (Oncogene LFC) (Rhobin)  | Arhgef2 (Kiaa0651) (Lbcl1) (Lfc) | 0 | 31  | 0 | 12 |
| Q8BPU7 | Engulfment and cell motility protein 1 (CED-12 homolog)                                                                                                                | Elmo1                            | 0 | 64  | 0 | 12 |
| P35235 | Tyrosine-protein phosphatase non-receptor type 11 (EC 3.1.3.48) (Protein-tyrosine phosphatase SYP) (SH-PTP2) (SHP-2) (Shp2)                                            | Ptpn11                           | 0 | 40  | 0 | 12 |
| P84084 | ADP-ribosylation factor 5                                                                                                                                              | Arf5                             | 0 | 210 | 0 | 13 |
| P97855 | Ras GTPase-activating protein-binding protein 1 (EC 3.6.1.-) (G3BP-1) (ATP-dependent DNA helicase VIII) (HDH-VIII) (GAP SH3 domain-binding protein 1)                  | G3bp1 (G3bp)                     | 0 | 75  | 0 | 15 |

|        |                                                                                                                                                                                                                                          |                                  |    |    |   |    |
|--------|------------------------------------------------------------------------------------------------------------------------------------------------------------------------------------------------------------------------------------------|----------------------------------|----|----|---|----|
| P28738 | Kinesin heavy chain isoform 5C (Kinesin heavy chain neuron-specific 2)                                                                                                                                                                   | Kif5c (Nkhc2)                    | 0  | 66 | 0 | 15 |
| P35438 | Glutamate [NMDA] receptor subunit zeta-1 (N-methyl-D-aspartate receptor subunit NR1)                                                                                                                                                     | Grin1 (Glurz1)                   | 0  | 27 | 0 | 15 |
| Q8R1U1 | Conserved oligomeric Golgi complex subunit 4 (COG complex subunit 4) (Component of oligomeric Golgi complex 4)                                                                                                                           | Cog4                             | 0  | 27 | 0 | 16 |
| P08071 | Lactotransferrin (Lactoferrin) (EC 3.4.21.-)                                                                                                                                                                                             | Ltf                              | 0  | 25 | 0 | 16 |
| P35918 | Vascular endothelial growth factor receptor 2 (VEGFR-2) (EC 2.7.10.1) (Protein-tyrosine kinase receptor flk-1) (Fetal liver kinase 1) (Kinase NYK) (CD antigen CD309)                                                                    | Kdr (Flk-1) (Flk1)               | 0  | 34 | 0 | 16 |
| P33175 | Kinesin heavy chain isoform 5A (Neuronal kinesin heavy chain) (NKHC) (Kinesin heavy chain neuron-specific 1)                                                                                                                             | Kif5a (Kiaa4086) (Kif5) (Nkhc1)  | 0  | 66 | 0 | 20 |
| Q80U72 | Protein LAP4 (Protein scribble homolog)                                                                                                                                                                                                  | Scrib (Kiaa0147) (Lap4) (Scrib1) | 0  | 29 | 0 | 22 |
| Q9QXL2 | Kinesin-like protein KIF21A                                                                                                                                                                                                              | Kif21a (Kiaa1708)                | 0  | 45 | 0 | 23 |
| Q9WVL3 | Solute carrier family 12 member 7 (Electroneutral potassium-chloride cotransporter 4) (K-Cl cotransporter 4)                                                                                                                             | Slc12a7 (Kcc4)                   | 0  | 27 | 0 | 24 |
| O08532 | Voltage-dependent calcium channel subunit alpha-2/delta-1 (Voltage-gated calcium channel subunit alpha-2/delta-1) [Cleaved into: Voltage-dependent calcium channel subunit alpha-2-1; Voltage-dependent calcium channel subunit delta-1] | Cacna2d1 (Cacna2)                | 0  | 25 | 0 | 26 |
| Q91ZD4 | Vang-like protein 2 (Van Gogh-like protein 2) (Loop-tail-associated protein) (Loop-tail protein 1)                                                                                                                                       | Vangl2 (Lpp1) (Ltap)             | 0  | 27 | 0 | 31 |
| P61750 | ADP-ribosylation factor 4                                                                                                                                                                                                                | Arf4                             | 21 | 56 | 2 | 8  |



|                                  |        |                                                                                                                                                                                                   |                         |     |     |    |    |
|----------------------------------|--------|---------------------------------------------------------------------------------------------------------------------------------------------------------------------------------------------------|-------------------------|-----|-----|----|----|
|                                  | P35278 | Ras-related protein Rab-5C                                                                                                                                                                        | Rab5c                   | 60  | 79  | 4  | 12 |
|                                  | P61205 | ADP-ribosylation factor 3                                                                                                                                                                         | Arf3                    | 32  | 423 | 6  | 17 |
|                                  | Q99PW8 | Kinesin-like protein KIF17 (MmKIF17)                                                                                                                                                              | Kif17                   | 24  | 44  | 13 | 35 |
|                                  | Q61037 | Tuberin (Tuberous sclerosis 2 homolog protein)                                                                                                                                                    | Tsc2                    | 22  | 46  | 38 | 91 |
|                                  | O35066 | Kinesin-like protein KIF3C                                                                                                                                                                        | Kif3c                   | 23  | 37  | 8  | 18 |
|                                  | Q9R244 | Short transient receptor potential channel 2 (TrpC2) (Transient receptor protein 2) (TRP-2) (mTrp2)                                                                                               | Trpc2 (Trp2) (Trrp2)    | 25  | 55  | 45 | 92 |
|                                  | Q8R1B5 | Complexin-3 (Complexin III) (CPX III)                                                                                                                                                             | Cplx3                   | 16  | 29  | 2  | 4  |
|                                  | O35239 | Tyrosine-protein phosphatase non-receptor type 9 (EC 3.1.3.48) (Protein-tyrosine phosphatase MEG2) (PTPase-MEG2)                                                                                  | Ptpn9                   | 17  | 29  | 2  | 4  |
|                                  | Q9R155 | Pendrin (Sodium-independent chloride/iodide transporter) (Solute carrier family 26 member 4)                                                                                                      | Slc26a4 (Pds)           | 32  | 18  | 3  | 6  |
|                                  | O55029 | Coatomer subunit beta' (Beta'-coat protein) (Beta'-COP) (p102)                                                                                                                                    | Copb2                   | 48  | 31  | 4  | 8  |
|                                  | P34022 | Ran-specific GTPase-activating protein (Ran-binding protein 1) (RANBP1) (Hpal1 tiny fragments locus 9a protein)                                                                                   | Ranbp1 (Htf9-a) (Htf9a) | 49  | 24  | 5  | 10 |
|                                  | Q9WTR1 | Transient receptor potential cation channel subfamily V member 2 (TrpV2) (Osm-9-like TRP channel 2) (OTRPC2) (Growth factor-regulated calcium channel) (GRC)                                      | Trpv2 (Grc)             | 22  | 30  | 5  | 10 |
|                                  | Q9JJZ2 | Tubulin alpha-8 chain (Alpha-tubulin 8)                                                                                                                                                           | Tuba8                   | 428 | 841 | 25 | 50 |
| regulation of biological process | Q91ZR3 | CREB/ATF bZIP transcription factor (Host cell factor-binding transcription factor Zhangfei) (HCF-binding transcription factor Zhangfei) (Tyrosine kinase-associated leucine zipper protein LAZip) | Crebzf (Zf)             | 0   | 36  | 0  | 1  |
|                                  | P62823 | Ras-related protein Rab-3C                                                                                                                                                                        | Rab3c                   | 0   | 53  | 0  | 2  |
|                                  | P21107 | Tropomyosin alpha-3 chain (Tropomyosin-3) (Gamma-tropomyosin)                                                                                                                                     | Tpm3 (Tpm-5) (Tpm5)     | 0   | 32  | 0  | 2  |
|                                  | P61027 | Ras-related protein Rab-10                                                                                                                                                                        | Rab10                   | 0   | 82  | 0  | 3  |
|                                  | Q504M8 | Ras-related protein Rab-26                                                                                                                                                                        | Rab26                   | 0   | 53  | 0  | 3  |
|                                  | P63011 | Ras-related protein Rab-3A                                                                                                                                                                        | Rab3a                   | 0   | 53  | 0  | 3  |
|                                  | Q9CZT8 | Ras-related protein Rab-3B                                                                                                                                                                        | Rab3b                   | 0   | 53  | 0  | 3  |

|        |                                                                                                                                                                                                       |                                   |   |    |   |   |
|--------|-------------------------------------------------------------------------------------------------------------------------------------------------------------------------------------------------------|-----------------------------------|---|----|---|---|
| P62746 | Rho-related GTP-binding protein RhoB                                                                                                                                                                  | Rhob<br>(Arhb)                    | 0 | 82 | 0 | 3 |
| Q8K0V4 | CCR4-NOT transcription complex subunit 3 (CCR4-associated factor 3)                                                                                                                                   | Cnot3<br>(Not3)                   | 0 | 27 | 0 | 4 |
| Q62048 | Astrocytic phosphoprotein PEA-15                                                                                                                                                                      | Pea15<br>(Pea15a)                 | 0 | 38 | 0 | 4 |
| Q80TJ7 | PHD finger protein 8                                                                                                                                                                                  | Phf8<br>(Kiaa1111)                | 0 | 25 | 0 | 4 |
| P46638 | Ras-related protein Rab-11B                                                                                                                                                                           | Rab11b                            | 0 | 49 | 0 | 4 |
| Q7TPD3 | Roundabout homolog 2                                                                                                                                                                                  | Robo2<br>(Kiaa1568)               | 0 | 30 | 0 | 4 |
| O35490 | Betaine--homocysteine S-methyltransferase 1 (EC 2.1.1.5)                                                                                                                                              | Bhmt                              | 0 | 28 | 0 | 5 |
| P70677 | Caspase-3 (CASP-3) (EC 3.4.22.56) (Apopain) (Cysteine protease CPP32) (CPP-32) (Yama protein) (SREBP cleavage activity 1) (SCA-1) (LICE) [Cleaved into: Caspase-3 subunit p17; Caspase-3 subunit p12] | Casp3<br>(Cp32)                   | 0 | 29 | 0 | 5 |
| Q9DBY5 | Chromobox protein homolog 6                                                                                                                                                                           | Cbx6                              | 0 | 26 | 0 | 5 |
| Q8BWG9 | Calcium release-activated calcium channel protein 1 (Protein orai-1) (Transmembrane protein 142A)                                                                                                     | Orai1<br>(Cracm1)<br>(Tmem142a)   | 0 | 33 | 0 | 5 |
| Q60668 | Heterogeneous nuclear ribonucleoprotein D0 (hnRNP D0) (AU-rich element RNA-binding protein 1)                                                                                                         | Hnrnpd<br>(Auf1)<br>(Hnrpd)       | 0 | 34 | 0 | 5 |
| P58389 | Serine/threonine-protein phosphatase 2A regulatory subunit B' (PP2A, subunit B', PR53 isoform) (Phosphotyrosyl phosphatase activator) (PTPA)                                                          | Ppp2r4<br>(Ptpa)                  | 0 | 32 | 0 | 5 |
| Q99K90 | Mitogen-activated protein kinase kinase kinase 7-interacting protein 2 (TAK1-binding protein 2) (TAB2)                                                                                                | Map3k7ip2<br>(Kiaa0733)<br>(Tab2) | 0 | 25 | 0 | 5 |

|        |                                                                                                                                                                   |                             |   |     |   |   |
|--------|-------------------------------------------------------------------------------------------------------------------------------------------------------------------|-----------------------------|---|-----|---|---|
| Q9ER58 | Testican-2 (SPARC/osteonectin, CWCV, and Kazal-like domains proteoglycan 2)                                                                                       | Spock2 (Ticn2)              | 0 | 26  | 0 | 5 |
| Q7TM95 | Tigger transposable element-derived protein 3                                                                                                                     | Tigd3                       | 0 | 26  | 0 | 5 |
| P10107 | Annexin A1 (Annexin-1) (Annexin I) (Lipocortin I) (Calpactin II) (Chromobindin-9) (p35) (Phospholipase A2 inhibitory protein)                                     | Anxa1 (Anx1) (Lpc-1) (Lpc1) | 0 | 26  | 0 | 6 |
| Q91X20 | Set1/Ash2 histone methyltransferase complex subunit ASH2 (ASH2-like protein)                                                                                      | Ash2l                       | 0 | 26  | 0 | 6 |
| P63330 | Serine/threonine-protein phosphatase 2A catalytic subunit alpha isoform (PP2A-alpha) (EC 3.1.3.16)                                                                | Ppp2ca                      | 0 | 101 | 0 | 6 |
| P14211 | Calreticulin (CRP55) (Calregulin) (HACBP) (ERp60)                                                                                                                 | Calr                        | 0 | 120 | 0 | 7 |
| Q99K48 | Non-POU domain-containing octamer-binding protein (NonO protein)                                                                                                  | Nono                        | 0 | 41  | 0 | 7 |
| Q99JX1 | Transcription initiation factor TFIID subunit 11 (Transcription initiation factor TFIID 28 kDa subunit) (TAF(II)28) (TAFII-28) (TAFII28) (TFIID subunit p30-beta) | Taf11                       | 0 | 37  | 0 | 7 |
| Q7TPR4 | Alpha-actinin-1 (Alpha-actinin cytoskeletal isoform) (Non-muscle alpha-actinin-1) (F-actin cross-linking protein)                                                 | Actn1                       | 0 | 34  | 0 | 8 |
| Q9DAR7 | Scavenger mRNA-decapping enzyme DcpS (EC 3.-.-.) (DCS-1) (Hint-related 7meGMP-directed hydrolase) (Histidine triad protein member 5) (HINT-5)                     | Dcps (Dcs1) (Hint5)         | 0 | 76  | 0 | 8 |
| P47857 | 6-phosphofructokinase, muscle type (EC 2.7.1.11) (Phosphofructokinase 1) (Phosphohexokinase) (Phosphofructo-1-kinase isozyme A) (PFK-A) (Phosphofructokinase-M)   | Pfkm (Pfk-m) (Pfka)         | 0 | 64  | 0 | 8 |
| Q9D0D5 | General transcription factor IIE subunit 1 (Transcription initiation factor IIE subunit alpha) (TFIIE-alpha) (General transcription factor IIE 56 kDa subunit)    | Gtf2e1                      | 0 | 27  | 0 | 8 |

|        |                                                                                                                                                                              |                            |   |    |   |    |
|--------|------------------------------------------------------------------------------------------------------------------------------------------------------------------------------|----------------------------|---|----|---|----|
| P07356 | Annexin A2 (Annexin-2) (Annexin II) (Lipocortin II) (Calpactin I heavy chain) (Chromobindin-8) (p36) (Protein I) (Placental anticoagulant protein IV) (PAP-IV)               | Anxa2 (Anx2) (Cal1h)       | 0 | 51 | 0 | 9  |
| P60762 | Mortality factor 4-like protein 1 (MORF-related gene 15 protein) (Transcription factor-like protein MRG15) (Testis-expressed gene 189 protein)                               | Morf4l1 (Mrg15) (Tex189)   | 0 | 33 | 0 | 9  |
| O88907 | E3 SUMO-protein ligase PIAS1 (Protein inhibitor of activated STAT protein 1) (DEAD/H box-binding protein 1)                                                                  | Pias1 (Ddxbp1)             | 0 | 31 | 0 | 9  |
| P15806 | Transcription factor E2-alpha (Immunoglobulin enhancer-binding factor E12/E47) (Transcription factor 3) (TCF-3) (Transcription factor A1)                                    | Tcf3 (Alf2) (Me2) (Tcfe2a) | 0 | 28 | 0 | 9  |
| P57780 | Alpha-actinin-4 (Non-muscle alpha-actinin 4) (F-actin cross-linking protein)                                                                                                 | Actn4                      | 0 | 34 | 0 | 10 |
| P36898 | Bone morphogenetic protein receptor type-1B (EC 2.7.11.30) (Serine/threonine-protein kinase receptor R6) (SKR6) (Activin receptor-like kinase 6) (ALK-6) (CD antigen CDw293) | Bmpr1b (Acvrlk6)           | 0 | 26 | 0 | 10 |
| Q80Y50 | Calmodulin-binding transcription activator 2                                                                                                                                 | Camta2 (Kiaa0909)          | 0 | 26 | 0 | 10 |
| Q61823 | Programmed cell death protein 4 (Topoisomerase-inhibitor suppressed protein) (Protein MA-3)                                                                                  | Pdcd4 (Ma3) (Tis)          | 0 | 27 | 0 | 10 |
| P35276 | Ras-related protein Rab-3D                                                                                                                                                   | Rab3d                      | 0 | 53 | 0 | 11 |
| Q99MK9 | Ras association domain-containing protein 1 (Protein 123F2)                                                                                                                  | Rassf1                     | 0 | 29 | 0 | 11 |
| Q9Z1Y4 | Thyroid receptor-interacting protein 6 (TRIP-6) (Zyxin-related protein 1) (ZRP-1)                                                                                            | Trip6 (Zrp1)               | 0 | 34 | 0 | 11 |
| P35917 | Vascular endothelial growth factor receptor 3 (VEGFR-3) (EC 2.7.10.1) (Tyrosine-protein kinase receptor FLT4)                                                                | Flt4 (Flt-4)               | 0 | 34 | 0 | 11 |

|        |                                                                                                                                                                                    |                                  |   |     |   |    |
|--------|------------------------------------------------------------------------------------------------------------------------------------------------------------------------------------|----------------------------------|---|-----|---|----|
| Q60875 | Rho guanine nucleotide exchange factor 2 (Guanine nucleotide exchange factor H1) (GEF-H1) (Lymphoid blast crisis-like 1) (LBC'S first cousin) (Oncogene LFC) (Rhobin)              | Arhgef2 (Kiaa0651) (Lbcl1) (Lfc) | 0 | 31  | 0 | 12 |
| P35235 | Tyrosine-protein phosphatase non-receptor type 11 (EC 3.1.3.48) (Protein-tyrosine phosphatase SYP) (SH-PTP2) (SHP-2) (Shp2)                                                        | Ptpn11                           | 0 | 40  | 0 | 12 |
| P27773 | Protein disulfide-isomerase A3 (EC 5.3.4.1) (Disulfide isomerase ER-60) (ERp60) (58 kDa microsomal protein) (p58) (ERp57)                                                          | Pdia3 (Erp) (Erp60) (Grp58)      | 0 | 98  | 0 | 14 |
| Q9CWI3 | BRCA2 and CDKN1A-interacting protein                                                                                                                                               | Bccip                            | 0 | 28  | 0 | 15 |
| P05622 | Beta-type platelet-derived growth factor receptor (EC 2.7.10.1) (PDGF-R-beta) (CD140 antigen-like family member B) (CD antigen CD140b)                                             | Pdgfrb (Pdgfr)                   | 0 | 34  | 0 | 16 |
| Q80TE4 | Signal-induced proliferation-associated 1-like protein 2 (SIPA1-like protein 2)                                                                                                    | Sipa1l2 (Kiaa0545)               | 0 | 36  | 0 | 16 |
| P35918 | Vascular endothelial growth factor receptor 2 (VEGFR-2) (EC 2.7.10.1) (Protein-tyrosine kinase receptor flk-1) (Fetal liver kinase 1) (Kinase NYK) (CD antigen CD309)              | Kdr (Flk-1) (Flk1)               | 0 | 34  | 0 | 16 |
| Q3UTH8 | Rho guanine nucleotide exchange factor 9 (Rac/Cdc42 guanine nucleotide exchange factor 9) (Collybistin)                                                                            | Arhgef9 (Kiaa0424)               | 0 | 31  | 0 | 17 |
| Q80XI3 | Eukaryotic translation initiation factor 4 gamma 3 (eIF-4-gamma 3) (eIF-4G 3) (eIF4G 3) (eIF-4-gamma II) (eIF4GII)                                                                 | Eif4g3                           | 0 | 58  | 0 | 17 |
| Q62383 | Transcription elongation factor SPT6                                                                                                                                               | Supt6h (Kiaa0162)                | 0 | 28  | 0 | 17 |
| P63085 | Mitogen-activated protein kinase 1 (EC 2.7.11.24) (Extracellular signal-regulated kinase 2) (ERK-2) (Mitogen-activated protein kinase 2) (MAP kinase 2) (MAPK 2) (p42-MAPK) (ERT1) | Mapk1 (Erk2) (Mapk) (Prkm1)      | 0 | 112 | 0 | 19 |

|        |                                                                                                                                                                                                                                                                      |                                           |    |     |    |    |
|--------|----------------------------------------------------------------------------------------------------------------------------------------------------------------------------------------------------------------------------------------------------------------------|-------------------------------------------|----|-----|----|----|
| Q810T2 | G2/mitotic-specific cyclin-B3                                                                                                                                                                                                                                        | Ccnb3<br>(Cycb3)                          | 0  | 29  | 0  | 22 |
| Q91YR7 | Pre-mRNA-processing factor 6 (U5 snRNP-associated 102 kDa protein) (U5-102 kDa protein) (PRP6 homolog)                                                                                                                                                               | Prpf6                                     | 0  | 25  | 0  | 22 |
| Q62468 | Villin-1                                                                                                                                                                                                                                                             | Vil1 (Vil)                                | 0  | 26  | 0  | 22 |
| Q8BHZ4 | Zinc finger protein 592 (Zfp-592)                                                                                                                                                                                                                                    | Znf592<br>(Kiaa0211)<br>(Zfp592)          | 0  | 26  | 0  | 24 |
| O08532 | Voltage-dependent calcium channel subunit alpha-2/delta-1 (Voltage-gated calcium channel subunit alpha-2/delta-1) [Cleaved into: Voltage-dependent calcium channel subunit alpha-2-1; Voltage-dependent calcium channel subunit delta-1]                             | Cacna2d1<br>(Cacna2)                      | 0  | 25  | 0  | 26 |
| Q9EQM6 | Protein DGCR8 (DiGeorge syndrome critical region 8 homolog) (Gy1)                                                                                                                                                                                                    | Dgcr8                                     | 0  | 28  | 0  | 29 |
| Q69ZM6 | Serine/threonine-protein kinase 36 (EC 2.7.11.1) (Fused homolog)                                                                                                                                                                                                     | Stk36<br>(Kiaa1278)                       | 0  | 29  | 0  | 35 |
| P48036 | Annexin A5 (Annexin-5) (Annexin V) (Lipocortin V) (Endonexin II) (Calphobindin I) (CBP-I) (Placental anticoagulant protein I) (PAP-I) (Placental anticoagulant protein 4) (PP4) (Thromboplastin inhibitor) (Vascular anticoagulant-alpha) (VAC-alpha) (Anchorin CII) | Anxa5<br>(Anx5)                           | 36 | 202 | 5  | 16 |
| P35278 | Ras-related protein Rab-5C                                                                                                                                                                                                                                           | Rab5c                                     | 60 | 79  | 4  | 12 |
| Q61037 | Tuberin (Tuberous sclerosis 2 homolog protein)                                                                                                                                                                                                                       | Tsc2                                      | 22 | 46  | 38 | 91 |
| Q99020 | Heterogeneous nuclear ribonucleoprotein A/B (hnRNP A/B) (CArG-binding factor-A) (CBF-A)                                                                                                                                                                              | Hnrnpab<br>(Cbf-a)<br>(Cgbfa)<br>(Hnrpab) | 56 | 138 | 5  | 11 |
| P12815 | Programmed cell death protein 6 (Probable calcium-binding protein ALG-2) (PMP41) (ALG-257)                                                                                                                                                                           | Pdcd6<br>(Alg2)                           | 42 | 19  | 1  | 2  |

|        |                                                                                                                                                                                                               |                         |    |     |    |    |
|--------|---------------------------------------------------------------------------------------------------------------------------------------------------------------------------------------------------------------|-------------------------|----|-----|----|----|
| Q8R1B5 | Complexin-3 (Complexin III) (CPX III)                                                                                                                                                                         | Cplx3                   | 16 | 29  | 2  | 4  |
| Q08024 | Core-binding factor subunit beta (CBF-beta) (Polyomavirus enhancer-binding protein 2 beta subunit) (PEBP2-beta) (PEA2-beta) (SL3-3 enhancer factor 1 subunit beta) (SL3/AKV core-binding factor beta subunit) | Cbfb (Pebp2b) (Pebpb2)  | 26 | 188 | 2  | 4  |
| P63028 | Translationally-controlled tumor protein (TCTP) (p23) (21 kDa polypeptide) (p21)                                                                                                                              | Tpt1 (Trt)              | 92 | 216 | 4  | 8  |
| P47878 | Insulin-like growth factor-binding protein 3 (IGF-binding protein 3) (IGFBP-3) (IBP-3)                                                                                                                        | Igfbp3 (Igfbp-3)        | 18 | 26  | 5  | 10 |
| P34022 | Ran-specific GTPase-activating protein (Ran-binding protein 1) (RANBP1) (Hpal1 tiny fragments locus 9a protein)                                                                                               | Ranbp1 (Htf9-a) (Htf9a) | 49 | 24  | 5  | 10 |
| Q9WTR1 | Transient receptor potential cation channel subfamily V member 2 (TrpV2) (Osm-9-like TRP channel 2) (OTRPC2) (Growth factor-regulated calcium channel) (GRC)                                                  | Trpv2 (Grc)             | 22 | 30  | 5  | 10 |
| Q62318 | Transcription intermediary factor 1-beta (TIF1-beta) (Tripartite motif-containing protein 28) (KRAB-A-interacting protein) (KRIP-1)                                                                           | Trim28 (Krip1) (Tif1b)  | 24 | 84  | 10 | 20 |

#### Enriched Molecular Function by Gene Ontology

| Term                          | Accession | Protein names                        | Genes         | prot_score_WT | prot_score_KO | prot_matches_WT | prot_matches_KO |
|-------------------------------|-----------|--------------------------------------|---------------|---------------|---------------|-----------------|-----------------|
| guanyl ribonucleotide binding | O35963    | Ras-related protein Rab-33B          | Rab33b        | 0             | 53            | 0               | 1               |
|                               | Q91V41    | Ras-related protein Rab-14           | Rab14         | 0             | 53            | 0               | 2               |
|                               | Q9JKM7    | Ras-related protein Rab-37           | Rab37         | 0             | 53            | 0               | 2               |
|                               | P62823    | Ras-related protein Rab-3C           | Rab3c         | 0             | 53            | 0               | 2               |
|                               | P61027    | Ras-related protein Rab-10           | Rab10         | 0             | 82            | 0               | 3               |
|                               | Q504M8    | Ras-related protein Rab-26           | Rab26         | 0             | 53            | 0               | 3               |
|                               | P63011    | Ras-related protein Rab-3A           | Rab3a         | 0             | 53            | 0               | 3               |
|                               | Q9CZT8    | Ras-related protein Rab-3B           | Rab3b         | 0             | 53            | 0               | 3               |
|                               | P62746    | Rho-related GTP-binding protein RhoB | Rhob (Arhb)   | 0             | 82            | 0               | 3               |
|                               | Q923S9    | Ras-related protein Rab-30           | Rab30 (Rsb30) | 0             | 53            | 0               | 4               |

|        |                                                                                                                     |                                            |    |     |   |    |
|--------|---------------------------------------------------------------------------------------------------------------------|--------------------------------------------|----|-----|---|----|
| Q8CG50 | Ras-related protein Rab-43                                                                                          | Rab43                                      | 0  | 53  | 0 | 4  |
| P46638 | Ras-related protein Rab-11B                                                                                         | Rab11b                                     | 0  | 49  | 0 | 4  |
| Q8BHD0 | Ras-related protein Rab-39A (Rab-39)                                                                                | Rab39<br>(Rab39a)                          | 0  | 53  | 0 | 4  |
| Q8BHC1 | Ras-related protein Rab-39B                                                                                         | Rab39b                                     | 0  | 53  | 0 | 5  |
| Q8CHH9 | Septin-8                                                                                                            | Sept8<br>(Kiaa0202<br>)                    | 0  | 30  | 0 | 7  |
| Q9D1G1 | Ras-related protein Rab-1B                                                                                          | Rab1b                                      | 0  | 91  | 0 | 8  |
| P35279 | Ras-related protein Rab-6A (Rab-6)                                                                                  | Rab6a<br>(Rab6)<br>(MNCb-<br>1660)         | 0  | 76  | 0 | 9  |
| Q8C1B7 | Septin-11                                                                                                           | Sept11<br>(D5Ert60<br>6e)                  | 0  | 30  | 0 | 9  |
| Q8BSL7 | ADP-ribosylation factor 2                                                                                           | Arf2                                       | 0  | 270 | 0 | 10 |
| Q61410 | cGMP-dependent protein kinase 2 (CGK 2) (EC 2.7.11.12) (cGKII) (Type II cGMP-dependent protein kinase)              | Prkg2<br>(Prkgr2)                          | 0  | 26  | 0 | 11 |
| P35283 | Ras-related protein Rab-12 (Rab-13)                                                                                 | Rab12                                      | 0  | 53  | 0 | 11 |
| P35276 | Ras-related protein Rab-3D                                                                                          | Rab3d                                      | 0  | 53  | 0 | 11 |
| Q8CG03 | cGMP-specific 3',5'-cyclic phosphodiesterase (EC 3.1.4.35) (cGMP-binding cGMP-specific phosphodiesterase) (CGB-PDE) | Pde5a<br>(Pde5)                            | 0  | 65  | 0 | 12 |
| P84084 | ADP-ribosylation factor 5                                                                                           | Arf5                                       | 0  | 210 | 0 | 13 |
| Q9R1T4 | Septin-6                                                                                                            | Sept6<br>(Kiaa0128<br>)                    | 0  | 30  | 0 | 13 |
| Q8BIK4 | Dedicator of cytokinesis protein 9 (Cdc42 guanine nucleotide exchange factor zizimin-1)                             | Dock9<br>(D14Wsu<br>89e)<br>(Kiaa1058<br>) | 0  | 28  | 0 | 25 |
| P61750 | ADP-ribosylation factor 4                                                                                           | Arf4                                       | 21 | 56  | 2 | 8  |
| P35278 | Ras-related protein Rab-5C                                                                                          | Rab5c                                      | 60 | 79  | 4 | 12 |



|                                 |                                     |                                                                                                        |                                    |     |     |    |    |
|---------------------------------|-------------------------------------|--------------------------------------------------------------------------------------------------------|------------------------------------|-----|-----|----|----|
|                                 | P61205                              | ADP-ribosylation factor 3                                                                              | Arf3                               | 32  | 423 | 6  | 17 |
|                                 | Q9JJZ2                              | Tubulin alpha-8 chain (Alpha-tubulin 8)                                                                | Tuba8                              | 428 | 841 | 25 | 50 |
| guanyl<br>nucleotide<br>binding | Q35963                              | Ras-related protein Rab-33B                                                                            | Rab33b                             | 0   | 53  | 0  | 1  |
|                                 | Q91V41                              | Ras-related protein Rab-14                                                                             | Rab14                              | 0   | 53  | 0  | 2  |
|                                 | Q9JKM7                              | Ras-related protein Rab-37                                                                             | Rab37                              | 0   | 53  | 0  | 2  |
|                                 | P62823                              | Ras-related protein Rab-3C                                                                             | Rab3c                              | 0   | 53  | 0  | 2  |
|                                 | P61027                              | Ras-related protein Rab-10                                                                             | Rab10                              | 0   | 82  | 0  | 3  |
|                                 | Q504M8                              | Ras-related protein Rab-26                                                                             | Rab26                              | 0   | 53  | 0  | 3  |
|                                 | P63011                              | Ras-related protein Rab-3A                                                                             | Rab3a                              | 0   | 53  | 0  | 3  |
|                                 | Q9CZT8                              | Ras-related protein Rab-3B                                                                             | Rab3b                              | 0   | 53  | 0  | 3  |
|                                 | P62746                              | Rho-related GTP-binding protein RhoB                                                                   | Rhob<br>(Arhb)                     | 0   | 82  | 0  | 3  |
|                                 | Q923S9                              | Ras-related protein Rab-30                                                                             | Rab30<br>(Rsb30)                   | 0   | 53  | 0  | 4  |
|                                 | Q8CG50                              | Ras-related protein Rab-43                                                                             | Rab43                              | 0   | 53  | 0  | 4  |
|                                 | P46638                              | Ras-related protein Rab-11B                                                                            | Rab11b                             | 0   | 49  | 0  | 4  |
|                                 | Q8BHD0                              | Ras-related protein Rab-39A (Rab-39)                                                                   | Rab39<br>(Rab39a)                  | 0   | 53  | 0  | 4  |
|                                 | Q8BHC1                              | Ras-related protein Rab-39B                                                                            | Rab39b                             | 0   | 53  | 0  | 5  |
|                                 | Q8CHH9                              | Septin-8                                                                                               | Sept8<br>(Kiaa0202<br>)            | 0   | 30  | 0  | 7  |
|                                 | Q9D1G1                              | Ras-related protein Rab-1B                                                                             | Rab1b                              | 0   | 91  | 0  | 8  |
|                                 | P35279                              | Ras-related protein Rab-6A (Rab-6)                                                                     | Rab6a<br>(Rab6)<br>(MNCb-<br>1660) | 0   | 76  | 0  | 9  |
|                                 | Q8C1B7                              | Septin-11                                                                                              | Sept11<br>(D5Ert60<br>6e)          | 0   | 30  | 0  | 9  |
|                                 | Q8BSL7                              | ADP-ribosylation factor 2                                                                              | Arf2                               | 0   | 270 | 0  | 10 |
|                                 | Q61410                              | cGMP-dependent protein kinase 2 (CGK 2) (EC 2.7.11.12) (cGKII) (Type II cGMP-dependent protein kinase) | Prkg2<br>(Prkgr2)                  | 0   | 26  | 0  | 11 |
| P35283                          | Ras-related protein Rab-12 (Rab-13) | Rab12                                                                                                  | 0                                  | 53  | 0   | 11 |    |
| P35276                          | Ras-related protein Rab-3D          | Rab3d                                                                                                  | 0                                  | 53  | 0   | 11 |    |

|             |        |                                                                                                                     |                              |     |     |    |    |
|-------------|--------|---------------------------------------------------------------------------------------------------------------------|------------------------------|-----|-----|----|----|
|             | Q8CG03 | cGMP-specific 3',5'-cyclic phosphodiesterase (EC 3.1.4.35) (cGMP-binding cGMP-specific phosphodiesterase) (CGB-PDE) | Pde5a (Pde5)                 | 0   | 65  | 0  | 12 |
|             | P84084 | ADP-ribosylation factor 5                                                                                           | Arf5                         | 0   | 210 | 0  | 13 |
|             | Q9R1T4 | Septin-6                                                                                                            | Sept6 (Kiaa0128)             | 0   | 30  | 0  | 13 |
|             | Q8BIK4 | Dedicator of cytokinesis protein 9 (Cdc42 guanine nucleotide exchange factor zizimin-1)                             | Dock9 (D14Wsu89e) (Kiaa1058) | 0   | 28  | 0  | 25 |
|             | P61750 | ADP-ribosylation factor 4                                                                                           | Arf4                         | 21  | 56  | 2  | 8  |
|             | P35278 | Ras-related protein Rab-5C                                                                                          | Rab5c                        | 60  | 79  | 4  | 12 |
|             | P61205 | ADP-ribosylation factor 3                                                                                           | Arf3                         | 32  | 423 | 6  | 17 |
|             | Q9JJZ2 | Tubulin alpha-8 chain (Alpha-tubulin 8)                                                                             | Tuba8                        | 428 | 841 | 25 | 50 |
| GTP binding | Q35963 | Ras-related protein Rab-33B                                                                                         | Rab33b                       | 0   | 53  | 0  | 1  |
|             | Q91V41 | Ras-related protein Rab-14                                                                                          | Rab14                        | 0   | 53  | 0  | 2  |
|             | Q9JKM7 | Ras-related protein Rab-37                                                                                          | Rab37                        | 0   | 53  | 0  | 2  |
|             | P62823 | Ras-related protein Rab-3C                                                                                          | Rab3c                        | 0   | 53  | 0  | 2  |
|             | P61027 | Ras-related protein Rab-10                                                                                          | Rab10                        | 0   | 82  | 0  | 3  |
|             | Q504M8 | Ras-related protein Rab-26                                                                                          | Rab26                        | 0   | 53  | 0  | 3  |
|             | P63011 | Ras-related protein Rab-3A                                                                                          | Rab3a                        | 0   | 53  | 0  | 3  |
|             | Q9CZT8 | Ras-related protein Rab-3B                                                                                          | Rab3b                        | 0   | 53  | 0  | 3  |
|             | P62746 | Rho-related GTP-binding protein RhoB                                                                                | Rhob (Arhb)                  | 0   | 82  | 0  | 3  |
|             | Q923S9 | Ras-related protein Rab-30                                                                                          | Rab30 (Rsb30)                | 0   | 53  | 0  | 4  |
|             | Q8CG50 | Ras-related protein Rab-43                                                                                          | Rab43                        | 0   | 53  | 0  | 4  |
|             | P46638 | Ras-related protein Rab-11B                                                                                         | Rab11b                       | 0   | 49  | 0  | 4  |
|             | Q8BHD0 | Ras-related protein Rab-39A (Rab-39)                                                                                | Rab39 (Rab39a)               | 0   | 53  | 0  | 4  |
|             | Q8BHC1 | Ras-related protein Rab-39B                                                                                         | Rab39b                       | 0   | 53  | 0  | 5  |
|             | Q8CHH9 | Septin-8                                                                                                            | Sept8 (Kiaa0202)             | 0   | 30  | 0  | 7  |

|                           |        |                                                                                                                                                                       |                                            |     |     |    |    |
|---------------------------|--------|-----------------------------------------------------------------------------------------------------------------------------------------------------------------------|--------------------------------------------|-----|-----|----|----|
|                           | Q9D1G1 | Ras-related protein Rab-1B                                                                                                                                            | Rab1b                                      | 0   | 91  | 0  | 8  |
|                           | P35279 | Ras-related protein Rab-6A (Rab-6)                                                                                                                                    | Rab6a<br>(Rab6)<br>(MNCb-<br>1660)         | 0   | 76  | 0  | 9  |
|                           | Q8C1B7 | Septin-11                                                                                                                                                             | Sept11<br>(D5Ert60<br>6e)                  | 0   | 30  | 0  | 9  |
|                           | Q8BSL7 | ADP-ribosylation factor 2                                                                                                                                             | Arf2                                       | 0   | 270 | 0  | 10 |
|                           | P35283 | Ras-related protein Rab-12 (Rab-13)                                                                                                                                   | Rab12                                      | 0   | 53  | 0  | 11 |
|                           | P35276 | Ras-related protein Rab-3D                                                                                                                                            | Rab3d                                      | 0   | 53  | 0  | 11 |
|                           | P84084 | ADP-ribosylation factor 5                                                                                                                                             | Arf5                                       | 0   | 210 | 0  | 13 |
|                           | Q9R1T4 | Septin-6                                                                                                                                                              | Sept6<br>(Kiaa0128<br>)                    | 0   | 30  | 0  | 13 |
|                           | Q8BIK4 | Dedicator of cytokinesis protein 9 (Cdc42 guanine nucleotide exchange factor zizimin-1)                                                                               | Dock9<br>(D14Wsu<br>89e)<br>(Kiaa1058<br>) | 0   | 28  | 0  | 25 |
|                           | P61750 | ADP-ribosylation factor 4                                                                                                                                             | Arf4                                       | 21  | 56  | 2  | 8  |
|                           | P35278 | Ras-related protein Rab-5C                                                                                                                                            | Rab5c                                      | 60  | 79  | 4  | 12 |
|                           | P61205 | ADP-ribosylation factor 3                                                                                                                                             | Arf3                                       | 32  | 423 | 6  | 17 |
|                           | Q9JJZ2 | Tubulin alpha-8 chain (Alpha-tubulin 8)                                                                                                                               | Tuba8                                      | 428 | 841 | 25 | 50 |
| electron carrier activity | Q8CDN6 | Thioredoxin-like protein 1 (32 kDa thioredoxin-related protein)                                                                                                       | Txn1<br>(Trp32)<br>(Txnl)                  | 0   | 173 | 0  | 3  |
|                           | Q9CPP6 | NADH dehydrogenase [ubiquinone] 1 alpha subcomplex subunit 5 (NADH-ubiquinone oxidoreductase 13 kDa-B subunit) (Complex I-13kD-B) (CI-13kD-B) (Complex I subunit B13) | Ndufa5                                     | 0   | 25  | 0  | 4  |
|                           | Q9CQZ5 | NADH dehydrogenase [ubiquinone] 1 alpha subcomplex subunit 6 (NADH-ubiquinone oxidoreductase B14 subunit) (Complex I-B14) (CI-B14)                                    | Ndufa6                                     | 0   | 30  | 0  | 5  |

|                     |        |                                                                                                                                                                            |                             |    |    |   |    |
|---------------------|--------|----------------------------------------------------------------------------------------------------------------------------------------------------------------------------|-----------------------------|----|----|---|----|
|                     | P09103 | Protein disulfide-isomerase (PDI) (EC 5.3.4.1) (Prolyl 4-hydroxylase subunit beta) (Cellular thyroid hormone-binding protein) (p55) (Erp59)                                | P4hb (Pdia1)                | 0  | 28 | 0 | 5  |
|                     | Q715T0 | Thioredoxin domain-containing protein 3 (Spermatid-specific thioredoxin-2) (Sptrx-2)                                                                                       | Txndc3 (Sptrx2)             | 0  | 25 | 0 | 7  |
|                     | Q9D0D5 | General transcription factor IIE subunit 1 (Transcription initiation factor IIE subunit alpha) (TFIIE-alpha) (General transcription factor IIE 56 kDa subunit)             | Gtf2e1                      | 0  | 27 | 0 | 8  |
|                     | Q9DC70 | NADH dehydrogenase [ubiquinone] iron-sulfur protein 7, mitochondrial (EC 1.6.5.3) (EC 1.6.99.3) (NADH-ubiquinone oxidoreductase 20 kDa subunit) (Complex I-20kD) (CI-20kD) | Ndufs7                      | 0  | 32 | 0 | 11 |
|                     | Q9Z1Y4 | Thyroid receptor-interacting protein 6 (TRIP-6) (Zyxin-related protein 1) (ZRP-1)                                                                                          | Trip6 (Zrp1)                | 0  | 34 | 0 | 11 |
|                     | P27773 | Protein disulfide-isomerase A3 (EC 5.3.4.1) (Disulfide isomerase ER-60) (ERp60) (58 kDa microsomal protein) (p58) (ERp57)                                                  | Pdia3 (Erp) (Erp60) (Grp58) | 0  | 98 | 0 | 14 |
|                     | Q9CQM9 | Glutaredoxin-3 (Thioredoxin-like protein 2) (PKC-interacting cousin of thioredoxin) (PKC-theta-interacting protein) (PKCg-interacting protein)                             | Glr3 (Picot) (Txnl2)        | 17 | 77 | 3 | 11 |
| calcium ion binding | O70423 | Membrane primary amine oxidase (EC 1.4.3.21) (Copper amine oxidase) (Semicarbazide-sensitive amine oxidase) (SSAO) (Vascular adhesion protein 1) (VAP-1)                   | Aoc3 (Vap1)                 | 0  | 35 | 0 | 4  |
|                     | O35639 | Annexin A3 (Annexin-3) (Annexin III) (Lipocortin III) (Placental anticoagulant protein III) (PAP-III) (35-alpha calcimedlin)                                               | Anxa3 (Anx3)                | 0  | 26 | 0 | 5  |
|                     | Q8BWG9 | Calcium release-activated calcium channel protein 1 (Protein orai-1) (Transmembrane protein 142A)                                                                          | Orai1 (Cracm1) (Tmem14 2a)  | 0  | 33 | 0 | 5  |
|                     | Q9ER58 | Testican-2 (SPARC/osteonectin, CWCV, and Kazal-like domains proteoglycan 2)                                                                                                | Spock2 (Ticn2)              | 0  | 26 | 0 | 5  |

|        |                                                                                                                                                                                                                                          |                             |   |     |   |    |
|--------|------------------------------------------------------------------------------------------------------------------------------------------------------------------------------------------------------------------------------------------|-----------------------------|---|-----|---|----|
| P10107 | Annexin A1 (Annexin-1) (Annexin I) (Lipocortin I) (Calpactin II) (Chromobindin-9) (p35) (Phospholipase A2 inhibitory protein)                                                                                                            | Anxa1 (Anx1) (Lpc-1) (Lpc1) | 0 | 26  | 0 | 6  |
| P00687 | Alpha-amylase 1 (EC 3.2.1.1) (1,4-alpha-D-glucan glucanohydrolase 1) (Salivary and hepatic alpha-amylase)                                                                                                                                | Amy1 (Amy-1-a) (Amy1a)      | 0 | 34  | 0 | 7  |
| P14211 | Calreticulin (CRP55) (Calregulin) (HACBP) (ERp60)                                                                                                                                                                                        | Calr                        | 0 | 120 | 0 | 7  |
| Q8VHF2 | Mucin and cadherin-like protein (Mu-protocadherin)                                                                                                                                                                                       | Mupcdh (Mucdhl)             | 0 | 28  | 0 | 7  |
| Q7TPR4 | Alpha-actinin-1 (Alpha-actinin cytoskeletal isoform) (Non-muscle alpha-actinin-1) (F-actin cross-linking protein)                                                                                                                        | Actn1                       | 0 | 34  | 0 | 8  |
| P97384 | Annexin A11 (Annexin-11) (Annexin XI) (Calcyclin-associated annexin 50) (CAP-50)                                                                                                                                                         | Anxa11 (Anx11)              | 0 | 26  | 0 | 9  |
| P07356 | Annexin A2 (Annexin-2) (Annexin II) (Lipocortin II) (Calpactin I heavy chain) (Chromobindin-8) (p36) (Protein I) (Placental anticoagulant protein IV) (PAP-IV)                                                                           | Anxa2 (Anx2) (Cal1h)        | 0 | 51  | 0 | 9  |
| P57780 | Alpha-actinin-4 (Non-muscle alpha-actinin 4) (F-actin cross-linking protein)                                                                                                                                                             | Actn4                       | 0 | 34  | 0 | 10 |
| P35438 | Glutamate [NMDA] receptor subunit zeta-1 (N-methyl-D-aspartate receptor subunit NR1)                                                                                                                                                     | Grin1 (Glurz1)              | 0 | 27  | 0 | 15 |
| Q80XI3 | Eukaryotic translation initiation factor 4 gamma 3 (eIF-4-gamma 3) (eIF-4G 3) (eIF4G 3) (eIF-4-gamma II) (eIF4GII)                                                                                                                       | Eif4g3                      | 0 | 58  | 0 | 17 |
| Q62468 | Villin-1                                                                                                                                                                                                                                 | Vil1 (Vil)                  | 0 | 26  | 0 | 22 |
| O08532 | Voltage-dependent calcium channel subunit alpha-2/delta-1 (Voltage-gated calcium channel subunit alpha-2/delta-1) [Cleaved into: Voltage-dependent calcium channel subunit alpha-2-1; Voltage-dependent calcium channel subunit delta-1] | Cacna2d1 (Cacna2)           | 0 | 25  | 0 | 26 |

|                           |        |                                                                                                                                                                                                                                                                      |                             |    |     |    |    |
|---------------------------|--------|----------------------------------------------------------------------------------------------------------------------------------------------------------------------------------------------------------------------------------------------------------------------|-----------------------------|----|-----|----|----|
|                           | P48036 | Annexin A5 (Annexin-5) (Annexin V) (Lipocortin V) (Endonexin II) (Calphobindin I) (CBP-I) (Placental anticoagulant protein I) (PAP-I) (Placental anticoagulant protein 4) (PP4) (Thromboplastin inhibitor) (Vascular anticoagulant-alpha) (VAC-alpha) (Anchorin CII) | Anxa5 (Anx5)                | 36 | 202 | 5  | 16 |
|                           | Q9R244 | Short transient receptor potential channel 2 (TrpC2) (Transient receptor protein 2) (TRP-2) (mTrp2)                                                                                                                                                                  | Trpc2 (Trp2) (Trrp2)        | 25 | 55  | 45 | 92 |
|                           | P12815 | Programmed cell death protein 6 (Probable calcium-binding protein ALG-2) (PMP41) (ALG-257)                                                                                                                                                                           | Pdcd6 (Alg2)                | 42 | 19  | 1  | 2  |
|                           | P63028 | Translationally-controlled tumor protein (TCTP) (p23) (21 kDa polypeptide) (p21)                                                                                                                                                                                     | Tpt1 (Trt)                  | 92 | 216 | 4  | 8  |
|                           | Q9WTR1 | Transient receptor potential cation channel subfamily V member 2 (TrpV2) (Osm-9-like TRP channel 2) (OTRPC2) (Growth factor-regulated calcium channel) (GRC)                                                                                                         | Trpv2 (Grc)                 | 22 | 30  | 5  | 10 |
| enzyme regulator activity | Q62252 | Sperm surface protein Sp17 (Sperm autoantigenic protein 17)                                                                                                                                                                                                          | Spa17 (Sp17)                | 0  | 29  | 0  | 4  |
|                           | O35639 | Annexin A3 (Annexin-3) (Annexin III) (Lipocortin III) (Placental anticoagulant protein III) (PAP-III) (35-alpha calcimedlin)                                                                                                                                         | Anxa3 (Anx3)                | 0  | 26  | 0  | 5  |
|                           | P70677 | Caspase-3 (CASP-3) (EC 3.4.22.56) (Apopain) (Cysteine protease CPP32) (CPP-32) (Yama protein) (SREBP cleavage activity 1) (SCA-1) (LICE) [Cleaved into: Caspase-3 subunit p17; Caspase-3 subunit p12]                                                                | Casp3 (Cpp32)               | 0  | 29  | 0  | 5  |
|                           | P58389 | Serine/threonine-protein phosphatase 2A regulatory subunit B' (PP2A, subunit B', PR53 isoform) (Phosphotyrosyl phosphatase activator) (PTPA)                                                                                                                         | Ppp2r4 (Ptpa)               | 0  | 32  | 0  | 5  |
|                           | P10107 | Annexin A1 (Annexin-1) (Annexin I) (Lipocortin I) (Calpactin II) (Chromobindin-9) (p35) (Phospholipase A2 inhibitory protein)                                                                                                                                        | Anxa1 (Anx1) (Lpc-1) (Lpc1) | 0  | 26  | 0  | 6  |

|        |                                                                                                                                                                       |                                           |   |     |   |    |
|--------|-----------------------------------------------------------------------------------------------------------------------------------------------------------------------|-------------------------------------------|---|-----|---|----|
| P27612 | Phospholipase A-2-activating protein (PLAP)                                                                                                                           | Plaa<br>(Plap)                            | 0 | 27  | 0 | 6  |
| P50396 | Rab GDP dissociation inhibitor alpha (Rab GDI alpha) (Guanosine diphosphate dissociation inhibitor 1) (GDI-1)                                                         | Gdi1<br>(Rabgdia)                         | 0 | 56  | 0 | 7  |
| P07356 | Annexin A2 (Annexin-2) (Annexin II) (Lipocortin II) (Calpactin I heavy chain) (Chromobindin-8) (p36) (Protein I) (Placental anticoagulant protein IV) (PAP-IV)        | Anxa2<br>(Anx2)<br>(Cal1h)                | 0 | 51  | 0 | 9  |
| Q9CWR8 | DNA (cytosine-5)-methyltransferase 3-like                                                                                                                             | Dnmt3l                                    | 0 | 29  | 0 | 9  |
| Q61410 | cGMP-dependent protein kinase 2 (CGK 2) (EC 2.7.11.12) (cGKII) (Type II cGMP-dependent protein kinase)                                                                | Prkg2<br>(Prkgr2)                         | 0 | 26  | 0 | 11 |
| Q60875 | Rho guanine nucleotide exchange factor 2 (Guanine nucleotide exchange factor H1) (GEF-H1) (Lymphoid blast crisis-like 1) (LBC'S first cousin) (Oncogene LFC) (Rhobin) | Arhgef2<br>(Kiaa0651)<br>(Lbcl1)<br>(Lfc) | 0 | 31  | 0 | 12 |
| P14685 | 26S proteasome non-ATPase regulatory subunit 3 (26S proteasome regulatory subunit S3) (Proteasome subunit p58) (Transplantation antigen P91A) (Tum-P91A antigen)      | Psm3<br>(P91a)<br>(Tstap91a)              | 0 | 25  | 0 | 12 |
| P84084 | ADP-ribosylation factor 5                                                                                                                                             | Arf5                                      | 0 | 210 | 0 | 13 |
| Q9CWI3 | BRCA2 and CDKN1A-interacting protein                                                                                                                                  | Bccip                                     | 0 | 28  | 0 | 15 |
| Q80TE4 | Signal-induced proliferation-associated 1-like protein 2 (SIPA1-like protein 2)                                                                                       | Sipa1l2<br>(Kiaa0545)                     | 0 | 36  | 0 | 16 |
| Q3UTH8 | Rho guanine nucleotide exchange factor 9 (Rac/Cdc42 guanine nucleotide exchange factor 9) (Collybistin)                                                               | Arhgef9<br>(Kiaa0424)                     | 0 | 31  | 0 | 17 |
| P83510 | Traf2 and NCK-interacting protein kinase (EC 2.7.11.1)                                                                                                                | Tnik<br>(Kiaa0551)                        | 0 | 54  | 0 | 17 |

|                                         |        |                                                                                                                                                           |                              |    |     |    |    |
|-----------------------------------------|--------|-----------------------------------------------------------------------------------------------------------------------------------------------------------|------------------------------|----|-----|----|----|
|                                         | Q8BIK4 | Dedicator of cytokinesis protein 9 (Cdc42 guanine nucleotide exchange factor zizimin-1)                                                                   | Dock9 (D14Wsu89e) (Kiaa1058) | 0  | 28  | 0  | 25 |
|                                         | Q7SIG6 | Development and differentiation-enhancing factor 2 (Pyk2 C-terminus-associated protein) (PAP) (Paxillin-associated protein with ARFGAP activity 3) (PAG3) | Ddef2 (Gm1523) (Gm592)       | 36 | 43  | 7  | 17 |
|                                         | Q61037 | Tuberin (Tuberous sclerosis 2 homolog protein)                                                                                                            | Tsc2                         | 22 | 46  | 38 | 91 |
|                                         | P47878 | Insulin-like growth factor-binding protein 3 (IGF-binding protein 3) (IGFBP-3) (IBP-3)                                                                    | Igfbp3 (Igfbp-3)             | 18 | 26  | 5  | 10 |
|                                         | P34022 | Ran-specific GTPase-activating protein (Ran-binding protein 1) (RANBP1) (Hpal tiny fragments locus 9a protein)                                            | Ranbp1 (Htf9-a) (Htf9a)      | 49 | 24  | 5  | 10 |
| substrate-specific transporter activity | P62823 | Ras-related protein Rab-3C                                                                                                                                | Rab3c                        | 0  | 53  | 0  | 2  |
|                                         | P14231 | Sodium/potassium-transporting ATPase subunit beta-2 (Sodium/potassium-dependent ATPase subunit beta-2) (Glial cell adhesion molecule) (AMOG)              | Atp1b2                       | 0  | 26  | 0  | 3  |
|                                         | P63011 | Ras-related protein Rab-3A                                                                                                                                | Rab3a                        | 0  | 53  | 0  | 3  |
|                                         | Q9CZT8 | Ras-related protein Rab-3B                                                                                                                                | Rab3b                        | 0  | 53  | 0  | 3  |
|                                         | Q61792 | LIM and SH3 domain protein 1 (LASP-1) (MLN 50)                                                                                                            | Lasp1 (Mln50)                | 0  | 72  | 0  | 4  |
|                                         | Q62048 | Astrocytic phosphoprotein PEA-15                                                                                                                          | Pea15 (Pea15a)               | 0  | 38  | 0  | 4  |
|                                         | Q8BHD0 | Ras-related protein Rab-39A (Rab-39)                                                                                                                      | Rab39 (Rab39a)               | 0  | 53  | 0  | 4  |
|                                         | Q8BWG9 | Calcium release-activated calcium channel protein 1 (Protein orai-1) (Transmembrane protein 142A)                                                         | Orai1 (Cracm1) (Tmem142a)    | 0  | 33  | 0  | 5  |
|                                         | Q8BHC1 | Ras-related protein Rab-39B                                                                                                                               | Rab39b                       | 0  | 53  | 0  | 5  |
|                                         | Q9D1G1 | Ras-related protein Rab-1B                                                                                                                                | Rab1b                        | 0  | 91  | 0  | 8  |
|                                         | Q8BSL7 | ADP-ribosylation factor 2                                                                                                                                 | Arf2                         | 0  | 270 | 0  | 10 |
|                                         | P84084 | ADP-ribosylation factor 5                                                                                                                                 | Arf5                         | 0  | 210 | 0  | 13 |



|                      |        |                                                                                                                                                                                                                                          |                      |    |    |    |    |
|----------------------|--------|------------------------------------------------------------------------------------------------------------------------------------------------------------------------------------------------------------------------------------------|----------------------|----|----|----|----|
|                      | P35438 | Glutamate [NMDA] receptor subunit zeta-1 (N-methyl-D-aspartate receptor subunit NR1)                                                                                                                                                     | Grin1 (Glurz1)       | 0  | 27 | 0  | 15 |
|                      | Q9WVL3 | Solute carrier family 12 member 7 (Electroneutral potassium-chloride cotransporter 4) (K-Cl cotransporter 4)                                                                                                                             | Slc12a7 (Kcc4)       | 0  | 27 | 0  | 24 |
|                      | O08532 | Voltage-dependent calcium channel subunit alpha-2/delta-1 (Voltage-gated calcium channel subunit alpha-2/delta-1) [Cleaved into: Voltage-dependent calcium channel subunit alpha-2-1; Voltage-dependent calcium channel subunit delta-1] | Cacna2d1 (Cacna2)    | 0  | 25 | 0  | 26 |
|                      | P61750 | ADP-ribosylation factor 4                                                                                                                                                                                                                | Arf4                 | 21 | 56 | 2  | 8  |
|                      | Q9R244 | Short transient receptor potential channel 2 (TrpC2) (Transient receptor protein 2) (TRP-2) (mTrp2)                                                                                                                                      | Trpc2 (Trp2) (Trrp2) | 25 | 55 | 45 | 92 |
|                      | Q9R155 | Pendrin (Sodium-independent chloride/iodide transporter) (Solute carrier family 26 member 4)                                                                                                                                             | Slc26a4 (Pds)        | 32 | 18 | 3  | 6  |
|                      | O55029 | Coatomer subunit beta' (Beta'-coat protein) (Beta'-COP) (p102)                                                                                                                                                                           | Copb2                | 48 | 31 | 4  | 8  |
|                      | Q9WTR1 | Transient receptor potential cation channel subfamily V member 2 (TrpV2) (Osm-9-like TRP channel 2) (OTRPC2) (Growth factor-regulated calcium channel) (GRC)                                                                             | Trpv2 (Grc)          | 22 | 30 | 5  | 10 |
| transporter activity | P62823 | Ras-related protein Rab-3C                                                                                                                                                                                                               | Rab3c                | 0  | 53 | 0  | 2  |
|                      | P14231 | Sodium/potassium-transporting ATPase subunit beta-2 (Sodium/potassium-dependent ATPase subunit beta-2) (Glial cell adhesion molecule) (AMOG)                                                                                             | Atp1b2               | 0  | 26 | 0  | 3  |
|                      | P11404 | Fatty acid-binding protein, heart (Heart-type fatty acid-binding protein) (H-FABP) (Mammary-derived growth inhibitor) (MDGI)                                                                                                             | Fabp3 (Fabph1)       | 0  | 25 | 0  | 3  |
|                      | P63011 | Ras-related protein Rab-3A                                                                                                                                                                                                               | Rab3a                | 0  | 53 | 0  | 3  |
|                      | Q9CZT8 | Ras-related protein Rab-3B                                                                                                                                                                                                               | Rab3b                | 0  | 53 | 0  | 3  |
|                      | Q61792 | LIM and SH3 domain protein 1 (LASP-1) (MLN 50)                                                                                                                                                                                           | Lasp1 (Mln50)        | 0  | 72 | 0  | 4  |

|        |                                                                                                                                                                                                                                          |                                     |    |     |    |    |
|--------|------------------------------------------------------------------------------------------------------------------------------------------------------------------------------------------------------------------------------------------|-------------------------------------|----|-----|----|----|
| Q62048 | Astrocytic phosphoprotein PEA-15                                                                                                                                                                                                         | Pea15<br>(Pea15a)                   | 0  | 38  | 0  | 4  |
| Q8BHD0 | Ras-related protein Rab-39A (Rab-39)                                                                                                                                                                                                     | Rab39<br>(Rab39a)                   | 0  | 53  | 0  | 4  |
| Q8BWG9 | Calcium release-activated calcium channel protein 1 (Protein orai-1) (Transmembrane protein 142A)                                                                                                                                        | Orai1<br>(Cracm1)<br>(Tmem14<br>2a) | 0  | 33  | 0  | 5  |
| Q8BHC1 | Ras-related protein Rab-39B                                                                                                                                                                                                              | Rab39b                              | 0  | 53  | 0  | 5  |
| Q9R1P4 | Proteasome subunit alpha type-1 (EC 3.4.25.1) (Proteasome component C2) (Macropain subunit C2) (Multicatalytic endopeptidase complex subunit C2) (Proteasome nu chain)                                                                   | Psm1                                | 0  | 95  | 0  | 8  |
| Q9D1G1 | Ras-related protein Rab-1B                                                                                                                                                                                                               | Rab1b                               | 0  | 91  | 0  | 8  |
| Q8BSL7 | ADP-ribosylation factor 2                                                                                                                                                                                                                | Arf2                                | 0  | 270 | 0  | 10 |
| P84084 | ADP-ribosylation factor 5                                                                                                                                                                                                                | Arf5                                | 0  | 210 | 0  | 13 |
| P35438 | Glutamate [NMDA] receptor subunit zeta-1 (N-methyl-D-aspartate receptor subunit NR1)                                                                                                                                                     | Grin1<br>(Glurz1)                   | 0  | 27  | 0  | 15 |
| Q9WVL3 | Solute carrier family 12 member 7 (Electroneutral potassium-chloride cotransporter 4) (K-Cl cotransporter 4)                                                                                                                             | Slc12a7<br>(Kcc4)                   | 0  | 27  | 0  | 24 |
| O08532 | Voltage-dependent calcium channel subunit alpha-2/delta-1 (Voltage-gated calcium channel subunit alpha-2/delta-1) [Cleaved into: Voltage-dependent calcium channel subunit alpha-2-1; Voltage-dependent calcium channel subunit delta-1] | Cacna2d1<br>(Cacna2)                | 0  | 25  | 0  | 26 |
| P61750 | ADP-ribosylation factor 4                                                                                                                                                                                                                | Arf4                                | 21 | 56  | 2  | 8  |
| Q9R244 | Short transient receptor potential channel 2 (TrpC2) (Transient receptor protein 2) (TRP-2) (mTrp2)                                                                                                                                      | Trpc2<br>(Trp2)<br>(Trrp2)          | 25 | 55  | 45 | 92 |
| Q8R1B5 | Complexin-3 (Complexin III) (CPX III)                                                                                                                                                                                                    | Cplx3                               | 16 | 29  | 2  | 4  |
| O35239 | Tyrosine-protein phosphatase non-receptor type 9 (EC 3.1.3.48) (Protein-tyrosine phosphatase MEG2) (PTPase-MEG2)                                                                                                                         | Ptpn9                               | 17 | 29  | 2  | 4  |

|                           |        |                                                                                                                                                              |                            |    |    |   |    |
|---------------------------|--------|--------------------------------------------------------------------------------------------------------------------------------------------------------------|----------------------------|----|----|---|----|
|                           | Q9R155 | Pendrin (Sodium-independent chloride/iodide transporter) (Solute carrier family 26 member 4)                                                                 | Slc26a4 (Pds)              | 32 | 18 | 3 | 6  |
|                           | O55029 | Coatomer subunit beta' (Beta'-coat protein) (Beta'-COP) (p102)                                                                                               | Copb2                      | 48 | 31 | 4 | 8  |
|                           | Q9WTR1 | Transient receptor potential cation channel subfamily V member 2 (TrpV2) (Osm-9-like TRP channel 2) (OTRPC2) (Growth factor-regulated calcium channel) (GRC) | Trpv2 (Grc)                | 22 | 30 | 5 | 10 |
| identical protein binding | O70423 | Membrane primary amine oxidase (EC 1.4.3.21) (Copper amine oxidase) (Semicarbazide-sensitive amine oxidase) (SSAO) (Vascular adhesion protein 1) (VAP-1)     | Aoc3 (Vap1)                | 0  | 35 | 0 | 4  |
|                           | Q7TPD3 | Roundabout homolog 2                                                                                                                                         | Robo2 (Kiaa1568)           | 0  | 30 | 0 | 4  |
|                           | P63087 | Serine/threonine-protein phosphatase PP1-gamma catalytic subunit (PP-1G) (EC 3.1.3.16) (Protein phosphatase 1C catalytic subunit)                            | Ppp1cc                     | 0  | 57 | 0 | 5  |
|                           | P58389 | Serine/threonine-protein phosphatase 2A regulatory subunit B' (PP2A, subunit B', PR53 isoform) (Phosphotyrosyl phosphatase activator) (PTPA)                 | Ppp2r4 (Ptpa)              | 0  | 32 | 0 | 5  |
|                           | P10518 | Delta-aminolevulinic acid dehydratase (ALADH) (EC 4.2.1.24) (Porphobilinogen synthase)                                                                       | Alad (Lv)                  | 0  | 78 | 0 | 6  |
|                           | Q7TPR4 | Alpha-actinin-1 (Alpha-actinin cytoskeletal isoform) (Non-muscle alpha-actinin-1) (F-actin cross-linking protein)                                            | Actn1                      | 0  | 34 | 0 | 8  |
|                           | P15806 | Transcription factor E2-alpha (Immunoglobulin enhancer-binding factor E12/E47) (Transcription factor 3) (TCF-3) (Transcription factor A1)                    | Tcf3 (Alf2) (Me2) (Tcfe2a) | 0  | 28 | 0 | 9  |
|                           | P57780 | Alpha-actinin-4 (Non-muscle alpha-actinin 4) (F-actin cross-linking protein)                                                                                 | Actn4                      | 0  | 34 | 0 | 10 |
|                           | Q99MK9 | Ras association domain-containing protein 1 (Protein 123F2)                                                                                                  | Rassf1                     | 0  | 29 | 0 | 11 |

|         |        |                                                                                                                                                                                                   |                                 |   |    |   |    |
|---------|--------|---------------------------------------------------------------------------------------------------------------------------------------------------------------------------------------------------|---------------------------------|---|----|---|----|
|         | P56960 | Exosome component 10 (Polymyositis/scleroderma autoantigen 2 homolog) (Autoantigen PM/Scl 2 homolog)                                                                                              | Exosc10 (Pmscl2)                | 0 | 27 | 0 | 12 |
| binding | O35963 | Ras-related protein Rab-33B                                                                                                                                                                       | Rab33b                          | 0 | 53 | 0 | 1  |
|         | Q91ZR3 | CREB/ATF bZIP transcription factor (Host cell factor-binding transcription factor Zhangfei) (HCF-binding transcription factor Zhangfei) (Tyrosine kinase-associated leucine zipper protein LAZip) | Crebzf (Zf)                     | 0 | 36 | 0 | 1  |
|         | P10922 | Histone H1.0 (Histone H1(0)) (Histone H1') (MyD196)                                                                                                                                               | H1f0 (H1fv)                     | 0 | 35 | 0 | 2  |
|         | Q9Z2X1 | Heterogeneous nuclear ribonucleoprotein F (hnRNP F)                                                                                                                                               | Hnrnpf (Hnrpf)                  | 0 | 35 | 0 | 2  |
|         | Q60654 | Killer cell lectin-like receptor 7 (T-cell surface glycoprotein Ly-49G) (Lymphocyte antigen 49g) (Ly-49g)                                                                                         | Klra7 (Ly-49g) (Ly49g) (Ly49g4) | 0 | 33 | 0 | 2  |
|         | Q91V41 | Ras-related protein Rab-14                                                                                                                                                                        | Rab14                           | 0 | 53 | 0 | 2  |
|         | Q9JKM7 | Ras-related protein Rab-37                                                                                                                                                                        | Rab37                           | 0 | 53 | 0 | 2  |
|         | P62823 | Ras-related protein Rab-3C                                                                                                                                                                        | Rab3c                           | 0 | 53 | 0 | 2  |
|         | O70492 | Sorting nexin-3 (SDP3 protein)                                                                                                                                                                    | Snx3                            | 0 | 54 | 0 | 2  |
|         | Q9JHJ7 | Testisin (EC 3.4.21.-) (Serine protease 21) (Tryptase 4)                                                                                                                                          | Prss21                          | 0 | 26 | 0 | 2  |
|         | P21107 | Tropomyosin alpha-3 chain (Tropomyosin-3) (Gamma-tropomyosin)                                                                                                                                     | Tpm3 (Tpm-5) (Tpm5)             | 0 | 32 | 0 | 2  |
|         | P14231 | Sodium/potassium-transporting ATPase subunit beta-2 (Sodium/potassium-dependent ATPase subunit beta-2) (Glial cell adhesion molecule) (AMOG)                                                      | Atp1b2                          | 0 | 26 | 0 | 3  |
|         | Q99L47 | Hsc70-interacting protein (Hip) (Protein ST13 homolog) (Protein FAM10A1)                                                                                                                          | St13 (Fam10a1) (Hip)            | 0 | 62 | 0 | 3  |
|         | P11404 | Fatty acid-binding protein, heart (Heart-type fatty acid-binding protein) (H-FABP) (Mammary-derived growth inhibitor) (MDGI)                                                                      | Fabp3 (Fabph1)                  | 0 | 25 | 0 | 3  |

|        |                                                                                                                                                                       |                    |   |    |   |   |
|--------|-----------------------------------------------------------------------------------------------------------------------------------------------------------------------|--------------------|---|----|---|---|
| Q9CS42 | Ribose-phosphate pyrophosphokinase 2 (EC 2.7.6.1) (Phosphoribosyl pyrophosphate synthetase II) (PRS-II)                                                               | Prps2              | 0 | 38 | 0 | 3 |
| Q9D0J8 | Parathymosin                                                                                                                                                          | Ptms               | 0 | 43 | 0 | 3 |
| P61027 | Ras-related protein Rab-10                                                                                                                                            | Rab10              | 0 | 82 | 0 | 3 |
| Q504M8 | Ras-related protein Rab-26                                                                                                                                            | Rab26              | 0 | 53 | 0 | 3 |
| P63011 | Ras-related protein Rab-3A                                                                                                                                            | Rab3a              | 0 | 53 | 0 | 3 |
| Q9CZT8 | Ras-related protein Rab-3B                                                                                                                                            | Rab3b              | 0 | 53 | 0 | 3 |
| P62746 | Rho-related GTP-binding protein RhoB                                                                                                                                  | Rhob<br>(Arhb)     | 0 | 82 | 0 | 3 |
| O70423 | Membrane primary amine oxidase (EC 1.4.3.21) (Copper amine oxidase) (Semicarbazide-sensitive amine oxidase) (SSAO) (Vascular adhesion protein 1) (VAP-1)              | Aoc3<br>(Vap1)     | 0 | 35 | 0 | 4 |
| Q8K0V4 | CCR4-NOT transcription complex subunit 3 (CCR4-associated factor 3)                                                                                                   | Cnot3<br>(Not3)    | 0 | 27 | 0 | 4 |
| P26883 | Peptidyl-prolyl cis-trans isomerase FKBP1A (PPlase FKBP1A) (EC 5.2.1.8) (FK506-binding protein 1A) (FKBP-1A) (Rotamase) (Immunophilin FKBP12) (12 kDa FKBP) (FKBP-12) | Fkbp1a<br>(Fkbp1)  | 0 | 55 | 0 | 4 |
| Q61792 | LIM and SH3 domain protein 1 (LASP-1) (MLN 50)                                                                                                                        | Lasp1<br>(Mln50)   | 0 | 72 | 0 | 4 |
| Q62048 | Astrocytic phosphoprotein PEA-15                                                                                                                                      | Pea15<br>(Pea15a)  | 0 | 38 | 0 | 4 |
| Q80TJ7 | PHD finger protein 8                                                                                                                                                  | Phf8<br>(Kiaa1111) | 0 | 25 | 0 | 4 |
| Q923S9 | Ras-related protein Rab-30                                                                                                                                            | Rab30<br>(Rsb30)   | 0 | 53 | 0 | 4 |
| Q8CG50 | Ras-related protein Rab-43                                                                                                                                            | Rab43              | 0 | 53 | 0 | 4 |
| P46638 | Ras-related protein Rab-11B                                                                                                                                           | Rab11b             | 0 | 49 | 0 | 4 |
| Q8BHD0 | Ras-related protein Rab-39A (Rab-39)                                                                                                                                  | Rab39<br>(Rab39a)  | 0 | 53 | 0 | 4 |

|        |                                                                                                                                                                                                       |                                 |   |    |   |   |
|--------|-------------------------------------------------------------------------------------------------------------------------------------------------------------------------------------------------------|---------------------------------|---|----|---|---|
| Q7TPD3 | Roundabout homolog 2                                                                                                                                                                                  | Robo2<br>(Kiaa1568)             | 0 | 30 | 0 | 4 |
| Q6IRU2 | Tropomyosin alpha-4 chain (Tropomyosin-4)                                                                                                                                                             | Tpm4                            | 0 | 42 | 0 | 4 |
| O35639 | Annexin A3 (Annexin-3) (Annexin III) (Lipocortin III) (Placental anticoagulant protein III) (PAP-III) (35-alpha calcimedlin)                                                                          | Anxa3<br>(Anx3)                 | 0 | 26 | 0 | 5 |
| O35490 | Betaine--homocysteine S-methyltransferase 1 (EC 2.1.1.5)                                                                                                                                              | Bhmt                            | 0 | 28 | 0 | 5 |
| P70677 | Caspase-3 (CASP-3) (EC 3.4.22.56) (Apopain) (Cysteine protease CPP32) (CPP-32) (Yama protein) (SREBP cleavage activity 1) (SCA-1) (LICE) [Cleaved into: Caspase-3 subunit p17; Caspase-3 subunit p12] | Casp3<br>(Cp32)                 | 0 | 29 | 0 | 5 |
| Q9DBY5 | Chromobox protein homolog 6                                                                                                                                                                           | Cbx6                            | 0 | 26 | 0 | 5 |
| Q8BWG9 | Calcium release-activated calcium channel protein 1 (Protein orai-1) (Transmembrane protein 142A)                                                                                                     | Orai1<br>(Cracm1)<br>(Tmem142a) | 0 | 33 | 0 | 5 |
| Q60668 | Heterogeneous nuclear ribonucleoprotein D0 (hnRNP D0) (AU-rich element RNA-binding protein 1)                                                                                                         | Hnrnpd<br>(Auf1)<br>(Hnrpd)     | 0 | 34 | 0 | 5 |
| Q61211 | Ligatin                                                                                                                                                                                               | Lgtn                            | 0 | 36 | 0 | 5 |
| P63087 | Serine/threonine-protein phosphatase PP1-gamma catalytic subunit (PP-1G) (EC 3.1.3.16) (Protein phosphatase 1C catalytic subunit)                                                                     | Ppp1cc                          | 0 | 57 | 0 | 5 |
| P58389 | Serine/threonine-protein phosphatase 2A regulatory subunit B' (PP2A, subunit B', PR53 isoform) (Phosphotyrosyl phosphatase activator) (PTPA)                                                          | Ppp2r4<br>(Ptpa)                | 0 | 32 | 0 | 5 |
| Q8BHC1 | Ras-related protein Rab-39B                                                                                                                                                                           | Rab39b                          | 0 | 53 | 0 | 5 |
| Q8BG05 | Heterogeneous nuclear ribonucleoprotein A3 (hnRNP A3)                                                                                                                                                 | Hnrnpa3<br>(Hnrpa3)             | 0 | 34 | 0 | 5 |
| Q9JLI8 | Squamous cell carcinoma antigen recognized by T-cells 3 (SART-3) (mSART-3) (Tumor-rejection antigen SART3)                                                                                            | Sart3<br>(Kiaa0156)             | 0 | 30 | 0 | 5 |

|        |                                                                                                                                                                                                |                                      |   |     |   |   |
|--------|------------------------------------------------------------------------------------------------------------------------------------------------------------------------------------------------|--------------------------------------|---|-----|---|---|
| Q99K90 | Mitogen-activated protein kinase kinase kinase 7-interacting protein 2 (TAK1-binding protein 2) (TAB2)                                                                                         | Map3k7ip2 (Kiaa0733) (Tab2)          | 0 | 25  | 0 | 5 |
| Q9ER58 | Testican-2 (SPARC/osteonectin, CWCV, and Kazal-like domains proteoglycan 2)                                                                                                                    | Spock2 (Ticn2)                       | 0 | 26  | 0 | 5 |
| Q7TM95 | Tigger transposable element-derived protein 3                                                                                                                                                  | Tigd3                                | 0 | 26  | 0 | 5 |
| P10107 | Annexin A1 (Annexin-1) (Annexin I) (Lipocortin I) (Calpactin II) (Chromobindin-9) (p35) (Phospholipase A2 inhibitory protein)                                                                  | Anxa1 (Anx1) (Lpc-1) (Lpc1)          | 0 | 26  | 0 | 6 |
| Q91X20 | Set1/Ash2 histone methyltransferase complex subunit ASH2 (ASH2-like protein)                                                                                                                   | Ash2l                                | 0 | 26  | 0 | 6 |
| Q9QZD9 | Eukaryotic translation initiation factor 3 subunit I (eIF3i) (Eukaryotic translation initiation factor 3 subunit 2) (eIF-3-beta) (eIF3 p36) (TGF-beta receptor-interacting protein 1) (TRIP-1) | Eif3i (Eif3s2) (Trip1)               | 0 | 62  | 0 | 6 |
| P10518 | Delta-aminolevulinic acid dehydratase (ALADH) (EC 4.2.1.24) (Porphobilinogen synthase)                                                                                                         | Alad (Lv)                            | 0 | 78  | 0 | 6 |
| Q9Z2Y3 | Homer protein homolog 1 (VASP/Ena-related gene up-regulated during seizure and LTP) (Vesl-1)                                                                                                   | Homer1 (Vesl1)                       | 0 | 30  | 0 | 6 |
| Q8CHP6 | Polyhomeotic-like protein 3                                                                                                                                                                    | Phc3                                 | 0 | 34  | 0 | 6 |
| P27612 | Phospholipase A-2-activating protein (PLAP)                                                                                                                                                    | Plaa (Plap)                          | 0 | 27  | 0 | 6 |
| Q3UM45 | Protein phosphatase 1 regulatory subunit 7 (Protein phosphatase 1 regulatory subunit 22)                                                                                                       | Ppp1r7 (Sds22)                       | 0 | 35  | 0 | 6 |
| P63330 | Serine/threonine-protein phosphatase 2A catalytic subunit alpha isoform (PP2A-alpha) (EC 3.1.3.16)                                                                                             | Ppp2ca                               | 0 | 101 | 0 | 6 |
| Q9R1T2 | SUMO-activating enzyme subunit 1 (Ubiquitin-like 1-activating enzyme E1A)                                                                                                                      | Sae1 (Aos1) (Sua1) (Ubl1a1) (Uble1a) | 0 | 62  | 0 | 6 |

|        |                                                                                                                                                                   |                        |   |     |   |   |
|--------|-------------------------------------------------------------------------------------------------------------------------------------------------------------------|------------------------|---|-----|---|---|
| O88342 | WD repeat-containing protein 1 (Actin-interacting protein 1) (AIP1)                                                                                               | Wdr1                   | 0 | 30  | 0 | 6 |
| P00687 | Alpha-amylase 1 (EC 3.2.1.1) (1,4-alpha-D-glucan glucanohydrolase 1) (Salivary and hepatic alpha-amylase)                                                         | Amy1 (Amy-1-a) (Amy1a) | 0 | 34  | 0 | 7 |
| P14211 | Calreticulin (CRP55) (Calregulin) (HACBP) (ERp60)                                                                                                                 | Calr                   | 0 | 120 | 0 | 7 |
| P43274 | Histone H1.4 (H1 VAR.2) (H1e)                                                                                                                                     | Hist1h1e (H1f4)        | 0 | 72  | 0 | 7 |
| P48967 | M-phase inducer phosphatase 3 (EC 3.1.3.48) (Dual specificity phosphatase Cdc25C)                                                                                 | Cdc25c (Cdc25m1)       | 0 | 33  | 0 | 7 |
| Q8VHF2 | Mucin and cadherin-like protein (Mu-protocadherin)                                                                                                                | Mupcdh (Mucdhl)        | 0 | 28  | 0 | 7 |
| Q99K48 | Non-POU domain-containing octamer-binding protein (NonO protein)                                                                                                  | Nono                   | 0 | 41  | 0 | 7 |
| Q5XPI3 | E3 ubiquitin-protein ligase RNF123 (EC 6.3.2.-) (RING finger protein 123) (Kip1 ubiquitination-promoting complex protein 1)                                       | Rnf123 (Kpc1)          | 0 | 26  | 0 | 7 |
| Q8CHH9 | Septin-8                                                                                                                                                          | Sept8 (Kiaa0202)       | 0 | 30  | 0 | 7 |
| Q9CX34 | Suppressor of G2 allele of SKP1 homolog                                                                                                                           | Sugt1                  | 0 | 44  | 0 | 7 |
| Q99JX1 | Transcription initiation factor TFIID subunit 11 (Transcription initiation factor TFIID 28 kDa subunit) (TAF(II)28) (TAFII-28) (TAFII28) (TFIID subunit p30-beta) | Taf11                  | 0 | 37  | 0 | 7 |
| Q715T0 | Thioredoxin domain-containing protein 3 (Spermatid-specific thioredoxin-2) (Sptrx-2)                                                                              | Txndc3 (Sptrx2)        | 0 | 25  | 0 | 7 |
| Q9ERZ4 | Muscarinic acetylcholine receptor M2                                                                                                                              | Chrm2 (Chrm-2)         | 0 | 31  | 0 | 8 |
| Q7TPR4 | Alpha-actinin-1 (Alpha-actinin cytoskeletal isoform) (Non-muscle alpha-actinin-1) (F-actin cross-linking protein)                                                 | Actn1                  | 0 | 34  | 0 | 8 |



|        |                                                                                                                                                                        |                         |   |     |   |   |
|--------|------------------------------------------------------------------------------------------------------------------------------------------------------------------------|-------------------------|---|-----|---|---|
| Q9DAR7 | Scavenger mRNA-decapping enzyme DcpS (EC 3.-.-.) (DCS-1) (Hint-related 7meGMP-directed hydrolase) (Histidine triad protein member 5) (HINT-5)                          | Dcps (Dcs1) (Hint5)     | 0 | 76  | 0 | 8 |
| P00375 | Dihydrofolate reductase (EC 1.5.1.3)                                                                                                                                   | Dhfr                    | 0 | 38  | 0 | 8 |
| P35922 | Fragile X mental retardation protein 1 homolog (Protein FMR-1) (FMRP) (mFmr1p)                                                                                         | Fmr1 (Fmr-1)            | 0 | 36  | 0 | 8 |
| P47857 | 6-phosphofructokinase, muscle type (EC 2.7.1.11) (Phosphofructokinase 1) (Phosphohexokinase) (Phosphofructo-1-kinase isozyme A) (PFK-A) (Phosphofructokinase-M)        | Pfkm (Pfk-m) (Pfka)     | 0 | 64  | 0 | 8 |
| Q80Y86 | Mitogen-activated protein kinase 15 (EC 2.7.11.24) (Extracellular signal-regulated kinase 7)                                                                           | Mapk15 (Erk7)           | 0 | 34  | 0 | 8 |
| P57722 | Poly(rC)-binding protein 3 (Alpha-CP3)                                                                                                                                 | Pcbp3                   | 0 | 122 | 0 | 8 |
| Q11136 | Xaa-Pro dipeptidase (X-Pro dipeptidase) (EC 3.4.13.9) (Proline dipeptidase) (Prolidase) (Imidodipeptidase) (Peptidase D) (Peptidase 4)                                 | Pepd (Pep4)             | 0 | 108 | 0 | 8 |
| Q9R1P4 | Proteasome subunit alpha type-1 (EC 3.4.25.1) (Proteasome component C2) (Macropain subunit C2) (Multicatalytic endopeptidase complex subunit C2) (Proteasome nu chain) | Psma1                   | 0 | 95  | 0 | 8 |
| Q9D1G1 | Ras-related protein Rab-1B                                                                                                                                             | Rab1b                   | 0 | 91  | 0 | 8 |
| P62849 | 40S ribosomal protein S24                                                                                                                                              | Rps24                   | 0 | 72  | 0 | 8 |
| Q9D0D5 | General transcription factor IIE subunit 1 (Transcription initiation factor IIE subunit alpha) (TFIIE-alpha) (General transcription factor IIE 56 kDa subunit)         | Gtf2e1                  | 0 | 27  | 0 | 8 |
| Q9JIF0 | Protein arginine N-methyltransferase 1 (EC 2.1.1.-)                                                                                                                    | Prmt1 (Hrmt1l2) (Mrmt1) | 0 | 150 | 0 | 9 |
| P97384 | Annexin A11 (Annexin-11) (Annexin XI) (Calcyclin-associated annexin 50) (CAP-50)                                                                                       | Anxa11 (Anx11)          | 0 | 26  | 0 | 9 |

|        |                                                                                                                                                                |                           |   |    |   |    |
|--------|----------------------------------------------------------------------------------------------------------------------------------------------------------------|---------------------------|---|----|---|----|
| P07356 | Annexin A2 (Annexin-2) (Annexin II) (Lipocortin II) (Calpactin I heavy chain) (Chromobindin-8) (p36) (Protein I) (Placental anticoagulant protein IV) (PAP-IV) | Anxa2 (Anx2) (Cal1h)      | 0 | 51 | 0 | 9  |
| Q99N16 | Cytochrome P450 4F3 (EC 1.14.13.30) (CYPIVF3) (Leukotriene-B(4) omega-hydroxylase) (Leukotriene B(4) 20-monooxygenase) (Cytochrome P450-LTB-omega)             | Cyp4f3 (Cyp4f18)          | 0 | 30 | 0 | 9  |
| Q9CWR8 | DNA (cytosine-5)-methyltransferase 3-like                                                                                                                      | Dnmt3l                    | 0 | 29 | 0 | 9  |
| P60762 | Mortality factor 4-like protein 1 (MORF-related gene 15 protein) (Transcription factor-like protein MRG15) (Testis-expressed gene 189 protein)                 | Morf4l1 (Mrg15) (Tex189)  | 0 | 33 | 0 | 9  |
| O88907 | E3 SUMO-protein ligase PIAS1 (Protein inhibitor of activated STAT protein 1) (DEAD/H box-binding protein 1)                                                    | Pias1 (Ddxbp1)            | 0 | 31 | 0 | 9  |
| Q8BWW9 | Serine/threonine-protein kinase N2 (EC 2.7.11.13) (Protein kinase C-like 2) (Protein-kinase C-related kinase 2)                                                | Pkn2 (Prkcl2)             | 0 | 25 | 0 | 9  |
| P35279 | Ras-related protein Rab-6A (Rab-6)                                                                                                                             | Rab6a (Rab6) (MNCb-1660)  | 0 | 76 | 0 | 9  |
| Q8C1B7 | Septin-11                                                                                                                                                      | Sept11 (D5Ert606e)        | 0 | 30 | 0 | 9  |
| Q8BMQ2 | General transcription factor 3C polypeptide 4 (EC 2.3.1.48) (Transcription factor IIIC subunit delta) (TF3C-delta) (TFIIIC 90 kDa subunit) (TFIIIC 90)         | Gtf3c4                    | 0 | 46 | 0 | 9  |
| P15806 | Transcription factor E2-alpha (Immunoglobulin enhancer-binding factor E12/E47) (Transcription factor 3) (TCF-3) (Transcription factor A1)                      | Tcf3 (Alf2) (Me2) (Tcf2a) | 0 | 28 | 0 | 9  |
| P57780 | Alpha-actinin-4 (Non-muscle alpha-actinin 4) (F-actin cross-linking protein)                                                                                   | Actn4                     | 0 | 34 | 0 | 10 |

|        |                                                                                                                                                                              |                   |   |     |   |    |
|--------|------------------------------------------------------------------------------------------------------------------------------------------------------------------------------|-------------------|---|-----|---|----|
| Q8BSL7 | ADP-ribosylation factor 2                                                                                                                                                    | Arf2              | 0 | 270 | 0 | 10 |
| P36898 | Bone morphogenetic protein receptor type-1B (EC 2.7.11.30) (Serine/threonine-protein kinase receptor R6) (SKR6) (Activin receptor-like kinase 6) (ALK-6) (CD antigen CDw293) | Bmpr1b (Acvrlk6)  | 0 | 26  | 0 | 10 |
| Q80Y50 | Calmodulin-binding transcription activator 2                                                                                                                                 | Camta2 (Kiaa0909) | 0 | 26  | 0 | 10 |
| Q9QXE2 | DNA polymerase lambda (Pol Lambda) (EC 2.7.7.7) (EC 4.2.99.-) (DNA polymerase kappa)                                                                                         | Poll (Polk)       | 0 | 48  | 0 | 10 |
| Q8C2S5 | F-box/LRR-repeat protein 5 (F-box and leucine-rich repeat protein 5)                                                                                                         | Fbxl5             | 0 | 27  | 0 | 10 |
| Q61823 | Programmed cell death protein 4 (Topoisomerase-inhibitor suppressed protein) (Protein MA-3)                                                                                  | Pdcd4 (Ma3) (Tis) | 0 | 27  | 0 | 10 |
| Q3TPE9 | Ankyrin repeat and MYND domain-containing protein 2                                                                                                                          | Ankmy2            | 0 | 25  | 0 | 11 |
| Q61410 | cGMP-dependent protein kinase 2 (CGK 2) (EC 2.7.11.12) (cGKII) (Type II cGMP-dependent protein kinase)                                                                       | Prkg2 (Prkgr2)    | 0 | 26  | 0 | 11 |
| Q9DC70 | NADH dehydrogenase [ubiquinone] iron-sulfur protein 7, mitochondrial (EC 1.6.5.3) (EC 1.6.99.3) (NADH-ubiquinone oxidoreductase 20 kDa subunit) (Complex I-20kD) (CI-20kD)   | Ndufs7            | 0 | 32  | 0 | 11 |
| P35283 | Ras-related protein Rab-12 (Rab-13)                                                                                                                                          | Rab12             | 0 | 53  | 0 | 11 |
| P35276 | Ras-related protein Rab-3D                                                                                                                                                   | Rab3d             | 0 | 53  | 0 | 11 |
| Q99MK9 | Ras association domain-containing protein 1 (Protein 123F2)                                                                                                                  | Rassf1            | 0 | 29  | 0 | 11 |
| Q9Z1Y4 | Thyroid receptor-interacting protein 6 (TRIP-6) (Zyxin-related protein 1) (ZRP-1)                                                                                            | Trip6 (Zrp1)      | 0 | 34  | 0 | 11 |
| P35917 | Vascular endothelial growth factor receptor 3 (VEGFR-3) (EC 2.7.10.1) (Tyrosine-protein kinase receptor FLT4)                                                                | Flt4 (Flt-4)      | 0 | 34  | 0 | 11 |
| Q400C8 | Archaemetzincin-2 (EC 3.-.-.-) (Archeobacterial metalloproteinase-like protein 2)                                                                                            | Amz2              | 0 | 34  | 0 | 12 |

|        |                                                                                                                                                                                                                                            |                                  |   |     |   |    |
|--------|--------------------------------------------------------------------------------------------------------------------------------------------------------------------------------------------------------------------------------------------|----------------------------------|---|-----|---|----|
| Q60875 | Rho guanine nucleotide exchange factor 2 (Guanine nucleotide exchange factor H1) (GEF-H1) (Lymphoid blast crisis-like 1) (LBC'S first cousin) (Oncogene LFC) (Rhobin)                                                                      | Arhgef2 (Kiaa0651) (Lbcl1) (Lfc) | 0 | 31  | 0 | 12 |
| Q8BPU7 | Engulfment and cell motility protein 1 (CED-12 homolog)                                                                                                                                                                                    | Elmo1                            | 0 | 64  | 0 | 12 |
| P56960 | Exosome component 10 (Polymyositis/scleroderma autoantigen 2 homolog) (Autoantigen PM/Scl 2 homolog)                                                                                                                                       | Exosc10 (Pmscl2)                 | 0 | 27  | 0 | 12 |
| Q8CG03 | cGMP-specific 3',5'-cyclic phosphodiesterase (EC 3.1.4.35) (cGMP-binding cGMP-specific phosphodiesterase) (CGB-PDE)                                                                                                                        | Pde5a (Pde5)                     | 0 | 65  | 0 | 12 |
| P14685 | 26S proteasome non-ATPase regulatory subunit 3 (26S proteasome regulatory subunit S3) (Proteasome subunit p58) (Transplantation antigen P91A) (Tum-P91A antigen)                                                                           | Psmc3 (P91a) (Tstap91a)          | 0 | 25  | 0 | 12 |
| P35235 | Tyrosine-protein phosphatase non-receptor type 11 (EC 3.1.3.48) (Protein-tyrosine phosphatase SYP) (SH-PTP2) (SHP-2) (Shp2)                                                                                                                | Ptpn11                           | 0 | 40  | 0 | 12 |
| P84084 | ADP-ribosylation factor 5                                                                                                                                                                                                                  | Arf5                             | 0 | 210 | 0 | 13 |
| Q9DAW9 | Calponin-3 (Calponin, acidic isoform)                                                                                                                                                                                                      | Cnn3                             | 0 | 27  | 0 | 13 |
| Q9R1T4 | Septin-6                                                                                                                                                                                                                                   | Sept6 (Kiaa0128)                 | 0 | 30  | 0 | 13 |
| Q63844 | Mitogen-activated protein kinase 3 (EC 2.7.11.24) (Extracellular signal-regulated kinase 1) (ERK-1) (Insulin-stimulated MAP2 kinase) (MAP kinase 1) (MAPK 1) (p44-ERK1) (ERT2) (p44-MAPK) (Microtubule-associated protein 2 kinase) (MNK1) | Mapk3 (Erk1) (Prkm3)             | 0 | 37  | 0 | 14 |
| P27773 | Protein disulfide-isomerase A3 (EC 5.3.4.1) (Disulfide isomerase ER-60) (ERp60) (58 kDa microsomal protein) (p58) (ERp57)                                                                                                                  | Pdia3 (Erp) (Erp60) (Grp58)      | 0 | 98  | 0 | 14 |
| Q60598 | Src substrate cortactin                                                                                                                                                                                                                    | Cttn (Ems1)                      | 0 | 27  | 0 | 14 |

|        |                                                                                                                                                                                                                                     |                    |   |     |   |    |
|--------|-------------------------------------------------------------------------------------------------------------------------------------------------------------------------------------------------------------------------------------|--------------------|---|-----|---|----|
| Q7M6U3 | Testis-expressed protein 14 (Testis-expressed sequence 14)                                                                                                                                                                          | Tex14              | 0 | 28  | 0 | 14 |
| P97855 | Ras GTPase-activating protein-binding protein 1 (EC 3.6.1.-) (G3BP-1) (ATP-dependent DNA helicase VIII) (HDH-VIII) (GAP SH3 domain-binding protein 1)                                                                               | G3bp1 (G3bp)       | 0 | 75  | 0 | 15 |
| P63242 | Eukaryotic translation initiation factor 5A-1 (eIF-5A-1) (eIF-5A1) (Eukaryotic initiation factor 5A isoform 1) (eIF-5A) (eIF-4D)                                                                                                    | Eif5a              | 0 | 379 | 0 | 15 |
| P28738 | Kinesin heavy chain isoform 5C (Kinesin heavy chain neuron-specific 2)                                                                                                                                                              | Kif5c (Nkhc2)      | 0 | 66  | 0 | 15 |
| P35438 | Glutamate [NMDA] receptor subunit zeta-1 (N-methyl-D-aspartate receptor subunit NR1)                                                                                                                                                | Grin1 (Glurz1)     | 0 | 27  | 0 | 15 |
| P28658 | Ataxin-10 (Spinocerebellar ataxia type 10 protein homolog) (Brain protein E46)                                                                                                                                                      | Atxn10 (Sca10)     | 0 | 27  | 0 | 16 |
| Q922D8 | C-1-tetrahydrofolate synthase, cytoplasmic (C1-THF synthase) [Includes: Methylenetetrahydrofolate dehydrogenase (EC 1.5.1.5); Methenyltetrahydrofolate cyclohydrolase (EC 3.5.4.9); Formyltetrahydrofolate synthetase (EC 6.3.4.3)] | Mthfd1             | 0 | 25  | 0 | 16 |
| Q8R1U1 | Conserved oligomeric Golgi complex subunit 4 (COG complex subunit 4) (Component of oligomeric Golgi complex 4)                                                                                                                      | Cog4               | 0 | 27  | 0 | 16 |
| Q8JZQ9 | Eukaryotic translation initiation factor 3 subunit B (eIF3b) (Eukaryotic translation initiation factor 3 subunit 9) (eIF-3-eta) (eIF3 p116)                                                                                         | Eif3b (Eif3s9)     | 0 | 52  | 0 | 16 |
| Q8BJL1 | F-box only protein 30                                                                                                                                                                                                               | Fbxo30             | 0 | 39  | 0 | 16 |
| Q8BRM2 | N-terminal kinase-like-binding protein 1 (NTKL-binding protein 1) (NTKL-BP1) (mNTKL-BP1) (SCY1-like 1-binding protein 1) (SCYL1-binding protein 1) (SCYL1-BP1)                                                                      | Scyl1bp1 (Ntklbp1) | 0 | 41  | 0 | 16 |
| P05622 | Beta-type platelet-derived growth factor receptor (EC 2.7.10.1) (PDGF-R-beta) (CD140 antigen-like family member B) (CD antigen CD140b)                                                                                              | Pdgfrb (Pdgfr)     | 0 | 34  | 0 | 16 |

|        |                                                                                                                                                                       |                                  |   |     |   |    |
|--------|-----------------------------------------------------------------------------------------------------------------------------------------------------------------------|----------------------------------|---|-----|---|----|
| Q80TE4 | Signal-induced proliferation-associated 1-like protein 2 (SIPA1-like protein 2)                                                                                       | Sipa1l2 (Kiaa0545)               | 0 | 36  | 0 | 16 |
| P08071 | Lactotransferrin (Lactoferrin) (EC 3.4.21.-)                                                                                                                          | Ltf                              | 0 | 25  | 0 | 16 |
| P35918 | Vascular endothelial growth factor receptor 2 (VEGFR-2) (EC 2.7.10.1) (Protein-tyrosine kinase receptor flk-1) (Fetal liver kinase 1) (Kinase NYK) (CD antigen CD309) | Kdr (Flk-1) (Flk1)               | 0 | 34  | 0 | 16 |
| Q80XI3 | Eukaryotic translation initiation factor 4 gamma 3 (eIF-4-gamma 3) (eIF-4G 3) (eIF4G 3) (eIF-4-gamma II) (eIF4GII)                                                    | Eif4g3                           | 0 | 58  | 0 | 17 |
| Q62383 | Transcription elongation factor SPT6                                                                                                                                  | Supt6h (Kiaa0162)                | 0 | 28  | 0 | 17 |
| P63085 | Mitogen-activated protein kinase 1 (EC 2.7.11.24) (Extracellular signal-regulated kinase 2) (ERK-2) (Mitogen-activated protein kinase 2) (MAPK 2) (p42-MAPK) (ERT1)   | Mapk1 (Erk2) (Mapk) (Prkm1)      | 0 | 112 | 0 | 19 |
| P33175 | Kinesin heavy chain isoform 5A (Neuronal kinesin heavy chain) (NKHC) (Kinesin heavy chain neuron-specific 1)                                                          | Kif5a (Kiaa4086) (Kif5) (Nkhc1)  | 0 | 66  | 0 | 20 |
| Q924W5 | Structural maintenance of chromosomes protein 6 (mSMC6)                                                                                                               | Smc6 (Kiaa4103) (Smc6l1)         | 0 | 38  | 0 | 21 |
| Q80U72 | Protein LAP4 (Protein scribble homolog)                                                                                                                               | Scrib (Kiaa0147) (Lap4) (Scrib1) | 0 | 29  | 0 | 22 |
| Q91YR7 | Pre-mRNA-processing factor 6 (U5 snRNP-associated 102 kDa protein) (U5-102 kDa protein) (PRP6 homolog)                                                                | Prpf6                            | 0 | 25  | 0 | 22 |
| Q62468 | Villin-1                                                                                                                                                              | Vil1 (Vil)                       | 0 | 26  | 0 | 22 |

|        |                                                                                                                                                                                                                                          |                                    |   |    |   |    |
|--------|------------------------------------------------------------------------------------------------------------------------------------------------------------------------------------------------------------------------------------------|------------------------------------|---|----|---|----|
| Q9QXL2 | Kinesin-like protein KIF21A                                                                                                                                                                                                              | Kif21a<br>(Kiaa1708)               | 0 | 45 | 0 | 23 |
| Q9WVL3 | Solute carrier family 12 member 7 (Electroneutral potassium-chloride cotransporter 4) (K-Cl cotransporter 4)                                                                                                                             | Slc12a7<br>(Kcc4)                  | 0 | 27 | 0 | 24 |
| Q8CFE4 | SCY1-like protein 2 (Coated vesicle-associated kinase of 104 kDa)                                                                                                                                                                        | Scyl2<br>(Cvak104)<br>(D10Ert802e) | 0 | 31 | 0 | 24 |
| Q8C636 | Spermatogenesis-associated protein 16                                                                                                                                                                                                    | Spata16                            | 0 | 41 | 0 | 24 |
| Q8BHZ4 | Zinc finger protein 592 (Zfp-592)                                                                                                                                                                                                        | Znf592<br>(Kiaa0211)<br>(Zfp592)   | 0 | 26 | 0 | 24 |
| Q8BIK4 | Dedicator of cytokinesis protein 9 (Cdc42 guanine nucleotide exchange factor zizimin-1)                                                                                                                                                  | Dock9<br>(D14Wsu89e)<br>(Kiaa1058) | 0 | 28 | 0 | 25 |
| O08532 | Voltage-dependent calcium channel subunit alpha-2/delta-1 (Voltage-gated calcium channel subunit alpha-2/delta-1) [Cleaved into: Voltage-dependent calcium channel subunit alpha-2-1; Voltage-dependent calcium channel subunit delta-1] | Cacna2d1<br>(Cacna2)               | 0 | 25 | 0 | 26 |
| Q60900 | ELAV-like protein 3 (Hu-antigen C) (HuC)                                                                                                                                                                                                 | Elavl3<br>(Huc)                    | 0 | 31 | 0 | 26 |
| Q9EQM6 | Protein DGCR8 (DiGeorge syndrome critical region 8 homolog) (Gy1)                                                                                                                                                                        | Dgcr8                              | 0 | 28 | 0 | 29 |
| Q91ZD4 | Vang-like protein 2 (Van Gogh-like protein 2) (Loop-tail-associated protein) (Loop-tail protein 1)                                                                                                                                       | Vangl2<br>(Lpp1)<br>(Ltap)         | 0 | 27 | 0 | 31 |
| Q69ZM6 | Serine/threonine-protein kinase 36 (EC 2.7.11.1) (Fused homolog)                                                                                                                                                                         | Stk36<br>(Kiaa1278)                | 0 | 29 | 0 | 35 |

|        |                                                                                                                                                                               |                                         |   |     |   |    |
|--------|-------------------------------------------------------------------------------------------------------------------------------------------------------------------------------|-----------------------------------------|---|-----|---|----|
| P14873 | Microtubule-associated protein 1B (MAP-1B) (MAP1.2) (MAP1(X)) [Cleaved into: MAP1 light chain LC1]                                                                            | Map1b (Mtap1b) (Mtap5)                  | 0 | 490 | 0 | 44 |
| Q9D2U9 | Histone H2B type 3-A                                                                                                                                                          | Hist3h2ba                               | 0 | 806 | 0 | 54 |
| Q62167 | ATP-dependent RNA helicase DDX3X (EC 3.6.1.-) (DEAD box protein 3, X-chromosomal) (DEAD box RNA helicase DEAD3) (mDEAD3) (Embryonic RNA helicase) (D1Pas1-related sequence 2) | Ddx3x (D1Pas1-rs2) (Ddx3) (Dead3) (Erh) | 0 | 62  | 0 | 64 |
| Q62095 | ATP-dependent RNA helicase DDX3Y (EC 3.6.1.-) (DEAD box protein 3, Y-chromosomal) (DEAD-box RNA helicase DEAD2) (mDEAD2) (D1Pas1-related sequence 1)                          | Ddx3y (D1Pas1-rs1) (Dead2)              | 0 | 62  | 0 | 65 |



|        |                                                                                                                                                |                                                                                                                                                                                                                                                                                              |    |     |   |    |
|--------|------------------------------------------------------------------------------------------------------------------------------------------------|----------------------------------------------------------------------------------------------------------------------------------------------------------------------------------------------------------------------------------------------------------------------------------------------|----|-----|---|----|
| P84228 | Histone H3.2                                                                                                                                   | Hist1h3b<br>(H3-53)<br>(H3.2)<br>(H3b);<br>Hist1h3c<br>(H3-143);<br>Hist1h3d<br>(H3-B);<br>Hist1h3e<br>(H3-F);<br>Hist1h3f<br>(H3.2-<br>221)<br>(H3f);<br>Hist2h3b<br>(H3.2-<br>616);<br>Hist2h3c1<br>(H3.2-<br>615)<br>(Hist2h3c<br>a1);<br>Hist2h3c2<br>(H3.2-<br>614)<br>(Hist2h3c<br>a2) | 0  | 417 | 0 | 68 |
| P10854 | Histone H2B type 1-M (H2B 291B)                                                                                                                | Hist1h2b<br>m                                                                                                                                                                                                                                                                                | 0  | 999 | 0 | 77 |
| Q9D9B4 | Leucine-rich repeat-containing protein C10orf11 homolog                                                                                        |                                                                                                                                                                                                                                                                                              | 20 | 36  | 1 | 8  |
| P61750 | ADP-ribosylation factor 4                                                                                                                      | Arf4                                                                                                                                                                                                                                                                                         | 21 | 56  | 2 | 8  |
| Q9CQM9 | Glutaredoxin-3 (Thioredoxin-like protein 2) (PKC-interacting cousin of thioredoxin) (PKC-theta-interacting protein) (PKCq-interacting protein) | Glrx3<br>(Picot)<br>(Txnl2)                                                                                                                                                                                                                                                                  | 17 | 77  | 3 | 11 |

|        |                                                                                                                                                                                                                                                                      |                        |     |     |    |     |
|--------|----------------------------------------------------------------------------------------------------------------------------------------------------------------------------------------------------------------------------------------------------------------------|------------------------|-----|-----|----|-----|
| Q01768 | Nucleoside diphosphate kinase B (NDP kinase B) (NDK B) (EC 2.7.4.6) (nm23-M2) (P18)                                                                                                                                                                                  | Nme2                   | 130 | 344 | 6  | 21  |
| P48036 | Annexin A5 (Annexin-5) (Annexin V) (Lipocortin V) (Endonexin II) (Calphobindin I) (CBP-I) (Placental anticoagulant protein I) (PAP-I) (Placental anticoagulant protein 4) (PP4) (Thromboplastin inhibitor) (Vascular anticoagulant-alpha) (VAC-alpha) (Anchorin CII) | Anxa5 (Anx5)           | 36  | 202 | 5  | 16  |
| P35278 | Ras-related protein Rab-5C                                                                                                                                                                                                                                           | Rab5c                  | 60  | 79  | 4  | 12  |
| P61205 | ADP-ribosylation factor 3                                                                                                                                                                                                                                            | Arf3                   | 32  | 423 | 6  | 17  |
| P15331 | Peripherin                                                                                                                                                                                                                                                           | Prph (Prph1)           | 45  | 181 | 10 | 28  |
| Q99PW8 | Kinesin-like protein KIF17 (MmKIF17)                                                                                                                                                                                                                                 | Kif17                  | 24  | 44  | 13 | 35  |
| Q3UA16 | Kinetochores protein Spc25                                                                                                                                                                                                                                           | Spc25 (Spbc25)         | 16  | 81  | 6  | 15  |
| Q7SIG6 | Development and differentiation-enhancing factor 2 (Pyk2 C-terminus-associated protein) (PAP) (Paxillin-associated protein with ARFGAP activity 3) (PAG3)                                                                                                            | Ddef2 (Gm1523) (Gm592) | 36  | 43  | 7  | 17  |
| O89053 | Coronin-1A (Coronin-like protein p57) (Coronin-like protein A) (Clipin-A) (Tryptophan aspartate-containing coat protein) (TACO)                                                                                                                                      | Coro1a (Coro1)         | 20  | 39  | 47 | 114 |
| P15864 | Histone H1.2 (H1 VAR.1) (H1c)                                                                                                                                                                                                                                        | Hist1h1c (H1f2)        | 77  | 222 | 12 | 29  |
| Q61037 | Tuberin (Tuberous sclerosis 2 homolog protein)                                                                                                                                                                                                                       | Tsc2                   | 22  | 46  | 38 | 91  |
| Q8BGY2 | Eukaryotic translation initiation factor 5A-2 (eIF-5A-2) (eIF-5A2) (Eukaryotic initiation factor 5A isoform 2)                                                                                                                                                       | Eif5a2                 | 70  | 331 | 6  | 14  |
| Q9D0R2 | Threonyl-tRNA synthetase, cytoplasmic (EC 6.1.1.3) (Threonine--tRNA ligase) (ThrRS)                                                                                                                                                                                  | Tars                   | 19  | 51  | 7  | 16  |
| O35066 | Kinesin-like protein KIF3C                                                                                                                                                                                                                                           | Kif3c                  | 23  | 37  | 8  | 18  |
| P11679 | Keratin, type II cytoskeletal 8 (Cytokeratin-8) (CK-8) (Keratin-8) (K8) (Cytokeratin endo A)                                                                                                                                                                         | Krt8 (Krt2-8)          | 61  | 175 | 13 | 29  |
| Q69Z69 | N-acetyltransferase ESCO1 (EC 2.3.1.-) (Establishment of cohesion 1 homolog 1) (ECO1 homolog 1)                                                                                                                                                                      | Esco1 (Kiaa1911)       | 42  | 173 | 56 | 124 |

|        |                                                                                                                                                                                                               |                                  |     |     |    |    |
|--------|---------------------------------------------------------------------------------------------------------------------------------------------------------------------------------------------------------------|----------------------------------|-----|-----|----|----|
| Q99020 | Heterogeneous nuclear ribonucleoprotein A/B (hnRNP A/B) (CArG-binding factor-A) (CBF-A)                                                                                                                       | Hnrnpab (Cbf-a) (Cgbfa) (Hnrpab) | 56  | 138 | 5  | 11 |
| Q61553 | Fascin (Singed-like protein)                                                                                                                                                                                  | Fscn1 (Fan1) (Snl)               | 117 | 307 | 10 | 21 |
| Q80YX1 | Tenascin (TN) (Tenascin-C) (TN-C) (Hexabrachion)                                                                                                                                                              | Tnc (Hxb)                        | 80  | 200 | 22 | 45 |
| Q9R244 | Short transient receptor potential channel 2 (TrpC2) (Transient receptor protein 2) (TRP-2) (mTrp2)                                                                                                           | Trpc2 (Trp2) (Trrp2)             | 25  | 55  | 45 | 92 |
| P12815 | Programmed cell death protein 6 (Probable calcium-binding protein ALG-2) (PMP41) (ALG-257)                                                                                                                    | Pdcd6 (Alg2)                     | 42  | 19  | 1  | 2  |
| Q9WVA3 | Mitotic checkpoint protein BUB3 (WD repeat type I transmembrane protein A72.5)                                                                                                                                | Bub3                             | 17  | 42  | 2  | 4  |
| Q8R1B5 | Complexin-3 (Complexin III) (CPX III)                                                                                                                                                                         | Cplx3                            | 16  | 29  | 2  | 4  |
| Q08024 | Core-binding factor subunit beta (CBF-beta) (Polyomavirus enhancer-binding protein 2 beta subunit) (PEBP2-beta) (PEA2-beta) (SL3-3 enhancer factor 1 subunit beta) (SL3/AKV core-binding factor beta subunit) | Cbfb (Pebp2b) (Pebpb2)           | 26  | 188 | 2  | 4  |
| Q61481 | Calcium/calmodulin-dependent 3',5'-cyclic nucleotide phosphodiesterase 1A (Cam-PDE 1A) (EC 3.1.4.17) (61 kDa Cam-PDE)                                                                                         | Pde1a                            | 21  | 30  | 3  | 6  |
| Q9R155 | Pendrin (Sodium-independent chloride/iodide transporter) (Solute carrier family 26 member 4)                                                                                                                  | Slc26a4 (Pds)                    | 32  | 18  | 3  | 6  |
| O55029 | Coatomer subunit beta' (Beta'-coat protein) (Beta'-COP) (p102)                                                                                                                                                | Copb2                            | 48  | 31  | 4  | 8  |
| P63028 | Translationally-controlled tumor protein (TCTP) (p23) (21 kDa polypeptide) (p21)                                                                                                                              | Tpt1 (Trt)                       | 92  | 216 | 4  | 8  |
| P47878 | Insulin-like growth factor-binding protein 3 (IGF-binding protein 3) (IGFBP-3) (IBP-3)                                                                                                                        | Igfbp3 (Igfbp-3)                 | 18  | 26  | 5  | 10 |

|                                          |           |                                                                                                                                                              |                         |               |               |                 |                 |
|------------------------------------------|-----------|--------------------------------------------------------------------------------------------------------------------------------------------------------------|-------------------------|---------------|---------------|-----------------|-----------------|
|                                          | Q9WTR1    | Transient receptor potential cation channel subfamily V member 2 (TrpV2) (Osm-9-like TRP channel 2) (OTRPC2) (Growth factor-regulated calcium channel) (GRC) | Trpv2 (Grc)             | 22            | 30            | 5               | 10              |
|                                          | Q62318    | Transcription intermediary factor 1-beta (TIF1-beta) (Tripartite motif-containing protein 28) (KRAB-A-interacting protein) (KRIP-1)                          | Trim28 (Krip1) (Tif1b)  | 24            | 84            | 10              | 20              |
|                                          | Q9JJZ2    | Tubulin alpha-8 chain (Alpha-tubulin 8)                                                                                                                      | Tuba8                   | 428           | 841           | 25              | 50              |
| enzyme activator activity                | P58389    | Serine/threonine-protein phosphatase 2A regulatory subunit B' (PP2A, subunit B', PR53 isoform) (Phosphotyrosyl phosphatase activator) (PTPA)                 | Ppp2r4 (Ptpa)           | 0             | 32            | 0               | 5               |
|                                          | P27612    | Phospholipase A-2-activating protein (PLAP)                                                                                                                  | Plaa (Plap)             | 0             | 27            | 0               | 6               |
|                                          | P50396    | Rab GDP dissociation inhibitor alpha (Rab GDI alpha) (Guanosine diphosphate dissociation inhibitor 1) (GDI-1)                                                | Gdi1 (Rabgdia)          | 0             | 56            | 0               | 7               |
|                                          | Q9CWR8    | DNA (cytosine-5)-methyltransferase 3-like                                                                                                                    | Dnmt3l                  | 0             | 29            | 0               | 9               |
|                                          | P84084    | ADP-ribosylation factor 5                                                                                                                                    | Arf5                    | 0             | 210           | 0               | 13              |
|                                          | Q80TE4    | Signal-induced proliferation-associated 1-like protein 2 (SIPA1-like protein 2)                                                                              | Sipa1l2 (Kiaa0545)      | 0             | 36            | 0               | 16              |
|                                          | Q7SIG6    | Development and differentiation-enhancing factor 2 (Pyk2 C-terminus-associated protein) (PAP) (Paxillin-associated protein with ARFGAP activity 3) (PAG3)    | Ddef2 (Gm1523) (Gm592)  | 36            | 43            | 7               | 17              |
|                                          | Q61037    | Tuberin (Tuberous sclerosis 2 homolog protein)                                                                                                               | Tsc2                    | 22            | 46            | 38              | 91              |
|                                          | P47878    | Insulin-like growth factor-binding protein 3 (IGF-binding protein 3) (IGFBP-3) (IBP-3)                                                                       | Igfbp3 (Igfbp-3)        | 18            | 26            | 5               | 10              |
|                                          | P34022    | Ran-specific GTPase-activating protein (Ran-binding protein 1) (RANBP1) (Hpal1 tiny fragments locus 9a protein)                                              | Ranbp1 (Htf9-a) (Htf9a) | 49            | 24            | 5               | 10              |
| Enriched Biological Processes by Panther |           |                                                                                                                                                              |                         |               |               |                 |                 |
| Term                                     | Accession | Protein names                                                                                                                                                | Genes                   | prot_score_WT | prot_score_KO | prot_matches_WT | prot_matches_KO |

|                           |        |                                                                                                                                   |                                |   |     |   |    |
|---------------------------|--------|-----------------------------------------------------------------------------------------------------------------------------------|--------------------------------|---|-----|---|----|
| DNA recombination         | Q91V41 | Ras-related protein Rab-14                                                                                                        | Rab14                          | 0 | 53  | 0 | 2  |
|                           | Q9JKM7 | Ras-related protein Rab-37                                                                                                        | Rab37                          | 0 | 53  | 0 | 2  |
|                           | P62823 | Ras-related protein Rab-3C                                                                                                        | Rab3c                          | 0 | 53  | 0 | 2  |
|                           | P61027 | Ras-related protein Rab-10                                                                                                        | Rab10                          | 0 | 82  | 0 | 3  |
|                           | Q504M8 | Ras-related protein Rab-26                                                                                                        | Rab26                          | 0 | 53  | 0 | 3  |
|                           | P63011 | Ras-related protein Rab-3A                                                                                                        | Rab3a                          | 0 | 53  | 0 | 3  |
|                           | Q9CZT8 | Ras-related protein Rab-3B                                                                                                        | Rab3b                          | 0 | 53  | 0 | 3  |
|                           | Q923S9 | Ras-related protein Rab-30                                                                                                        | Rab30<br>(Rsb30)               | 0 | 53  | 0 | 4  |
|                           | Q9D1G1 | Ras-related protein Rab-1B                                                                                                        | Rab1b                          | 0 | 91  | 0 | 8  |
|                           | P35283 | Ras-related protein Rab-12 (Rab-13)                                                                                               | Rab12                          | 0 | 53  | 0 | 11 |
|                           | P35276 | Ras-related protein Rab-3D                                                                                                        | Rab3d                          | 0 | 53  | 0 | 11 |
| General vesicle transport | Q91V41 | Ras-related protein Rab-14                                                                                                        | Rab14                          | 0 | 53  | 0 | 2  |
|                           | Q9JKM7 | Ras-related protein Rab-37                                                                                                        | Rab37                          | 0 | 53  | 0 | 2  |
|                           | P62823 | Ras-related protein Rab-3C                                                                                                        | Rab3c                          | 0 | 53  | 0 | 2  |
|                           | P61027 | Ras-related protein Rab-10                                                                                                        | Rab10                          | 0 | 82  | 0 | 3  |
|                           | Q504M8 | Ras-related protein Rab-26                                                                                                        | Rab26                          | 0 | 53  | 0 | 3  |
|                           | P63011 | Ras-related protein Rab-3A                                                                                                        | Rab3a                          | 0 | 53  | 0 | 3  |
|                           | Q9CZT8 | Ras-related protein Rab-3B                                                                                                        | Rab3b                          | 0 | 53  | 0 | 3  |
|                           | Q923S9 | Ras-related protein Rab-30                                                                                                        | Rab30<br>(Rsb30)               | 0 | 53  | 0 | 4  |
|                           | Q8CG50 | Ras-related protein Rab-43                                                                                                        | Rab43                          | 0 | 53  | 0 | 4  |
|                           | Q8BHD0 | Ras-related protein Rab-39A (Rab-39)                                                                                              | Rab39<br>(Rab39a)              | 0 | 53  | 0 | 4  |
|                           | P63087 | Serine/threonine-protein phosphatase PP1-gamma catalytic subunit (PP-1G) (EC 3.1.3.16) (Protein phosphatase 1C catalytic subunit) | Ppp1cc                         | 0 | 57  | 0 | 5  |
|                           | Q8BHC1 | Ras-related protein Rab-39B                                                                                                       | Rab39b                         | 0 | 53  | 0 | 5  |
|                           | Q9D1G1 | Ras-related protein Rab-1B                                                                                                        | Rab1b                          | 0 | 91  | 0 | 8  |
|                           | P35279 | Ras-related protein Rab-6A (Rab-6)                                                                                                | Rab6a<br>(Rab6)<br>(MNCb-1660) | 0 | 76  | 0 | 9  |
|                           | Q8BSL7 | ADP-ribosylation factor 2                                                                                                         | Arf2                           | 0 | 270 | 0 | 10 |
|                           | Q8C2S5 | F-box/LRR-repeat protein 5 (F-box and leucine-rich repeat protein 5)                                                              | Fbxl5                          | 0 | 27  | 0 | 10 |

|                          |        |                                                                                                                             |                            |    |     |   |    |
|--------------------------|--------|-----------------------------------------------------------------------------------------------------------------------------|----------------------------|----|-----|---|----|
|                          | P35283 | Ras-related protein Rab-12 (Rab-13)                                                                                         | Rab12                      | 0  | 53  | 0 | 11 |
|                          | P35276 | Ras-related protein Rab-3D                                                                                                  | Rab3d                      | 0  | 53  | 0 | 11 |
|                          | P84084 | ADP-ribosylation factor 5                                                                                                   | Arf5                       | 0  | 210 | 0 | 13 |
|                          | P35438 | Glutamate [NMDA] receptor subunit zeta-1 (N-methyl-D-aspartate receptor subunit NR1)                                        | Grin1 (Glurz1)             | 0  | 27  | 0 | 15 |
|                          | Q8BHZ4 | Zinc finger protein 592 (Zfp-592)                                                                                           | Znf592 (Kiaa0211) (Zfp592) | 0  | 26  | 0 | 24 |
|                          | P61750 | ADP-ribosylation factor 4                                                                                                   | Arf4                       | 21 | 56  | 2 | 8  |
|                          | P35278 | Ras-related protein Rab-5C                                                                                                  | Rab5c                      | 60 | 79  | 4 | 12 |
|                          | P61205 | ADP-ribosylation factor 3                                                                                                   | Arf3                       | 32 | 423 | 6 | 17 |
|                          | P12815 | Programmed cell death protein 6 (Probable calcium-binding protein ALG-2) (PMP41) (ALG-257)                                  | Pdcd6 (Alg2)               | 42 | 19  | 1 | 2  |
| Small molecule transport | Q9JKM7 | Ras-related protein Rab-37                                                                                                  | Rab37                      | 0  | 53  | 0 | 2  |
|                          | P62823 | Ras-related protein Rab-3C                                                                                                  | Rab3c                      | 0  | 53  | 0 | 2  |
|                          | P46638 | Ras-related protein Rab-11B                                                                                                 | Rab11b                     | 0  | 49  | 0 | 4  |
|                          | O35490 | Betaine--homocysteine S-methyltransferase 1 (EC 2.1.1.5)                                                                    | Bhmt                       | 0  | 28  | 0 | 5  |
|                          | O88342 | WD repeat-containing protein 1 (Actin-interacting protein 1) (AIP1)                                                         | Wdr1                       | 0  | 30  | 0 | 6  |
|                          | Q61823 | Programmed cell death protein 4 (Topoisomerase-inhibitor suppressed protein) (Protein MA-3)                                 | Pdcd4 (Ma3) (Tis)          | 0  | 27  | 0 | 10 |
|                          | P35917 | Vascular endothelial growth factor receptor 3 (VEGFR-3) (EC 2.7.10.1) (Tyrosine-protein kinase receptor FLT4)               | Flt4 (Flt-4)               | 0  | 34  | 0 | 11 |
|                          | P35235 | Tyrosine-protein phosphatase non-receptor type 11 (EC 3.1.3.48) (Protein-tyrosine phosphatase SYP) (SH-PTP2) (SHP-2) (Shp2) | Ptpn11                     | 0  | 40  | 0 | 12 |
|                          | Q8C2E7 | Strumpellin                                                                                                                 | Kiaa0196                   | 0  | 40  | 0 | 22 |

|                       |        |                                                                                                                                                          |                              |    |    |   |    |
|-----------------------|--------|----------------------------------------------------------------------------------------------------------------------------------------------------------|------------------------------|----|----|---|----|
|                       | Q8BIK4 | Dedicator of cytokinesis protein 9 (Cdc42 guanine nucleotide exchange factor zizimin-1)                                                                  | Dock9 (D14Wsu89e) (Kiaa1058) | 0  | 28 | 0 | 25 |
|                       | Q80U62 | Uncharacterized protein KIAA0226                                                                                                                         | Kiaa0226                     | 36 | 19 | 7 | 15 |
|                       | Q9R155 | Pendrin (Sodium-independent chloride/iodide transporter) (Solute carrier family 26 member 4)                                                             | Slc26a4 (Pds)                | 32 | 18 | 3 | 6  |
| Synaptic transmission | P62823 | Ras-related protein Rab-3C                                                                                                                               | Rab3c                        | 0  | 53 | 0 | 2  |
|                       | Q8CG50 | Ras-related protein Rab-43                                                                                                                               | Rab43                        | 0  | 53 | 0 | 4  |
|                       | O35490 | Betaine--homocysteine S-methyltransferase 1 (EC 2.1.1.5)                                                                                                 | Bhmt                         | 0  | 28 | 0 | 5  |
|                       | Q9Z2Y3 | Homer protein homolog 1 (VASP/Ena-related gene up-regulated during seizure and LTP) (Vesl-1)                                                             | Homer1 (Vesl1)               | 0  | 30 | 0 | 6  |
|                       | P62849 | 40S ribosomal protein S24                                                                                                                                | Rps24                        | 0  | 72 | 0 | 8  |
|                       | P35279 | Ras-related protein Rab-6A (Rab-6)                                                                                                                       | Rab6a (Rab6) (MNCb-1660)     | 0  | 76 | 0 | 9  |
|                       | P35235 | Tyrosine-protein phosphatase non-receptor type 11 (EC 3.1.3.48) (Protein-tyrosine phosphatase SYP) (SH-PTP2) (SHP-2) (Shp2)                              | Ptpn11                       | 0  | 40 | 0 | 12 |
|                       | P35278 | Ras-related protein Rab-5C                                                                                                                               | Rab5c                        | 60 | 79 | 4 | 12 |
|                       | Q8R1B5 | Complexin-3 (Complexin III) (CPX III)                                                                                                                    | Cplx3                        | 16 | 29 | 2 | 4  |
|                       | Q9JJU8 | SH3 domain-binding glutamic acid-rich-like protein                                                                                                       | Sh3bgrl                      | 29 | 69 | 2 | 4  |
| Cell motility         | P21107 | Tropomyosin alpha-3 chain (Tropomyosin-3) (Gamma-tropomyosin)                                                                                            | Tpm3 (Tpm-5) (Tpm5)          | 0  | 32 | 0 | 2  |
|                       | Q9D0J8 | Parathymosin                                                                                                                                             | Ptms                         | 0  | 43 | 0 | 3  |
|                       | P63011 | Ras-related protein Rab-3A                                                                                                                               | Rab3a                        | 0  | 53 | 0 | 3  |
|                       | O70423 | Membrane primary amine oxidase (EC 1.4.3.21) (Copper amine oxidase) (Semicarbazide-sensitive amine oxidase) (SSAO) (Vascular adhesion protein 1) (VAP-1) | Aoc3 (Vap1)                  | 0  | 35 | 0 | 4  |

|        |                                                                                                                                                                                                                                                                      |                             |     |     |    |    |
|--------|----------------------------------------------------------------------------------------------------------------------------------------------------------------------------------------------------------------------------------------------------------------------|-----------------------------|-----|-----|----|----|
| O35639 | Annexin A3 (Annexin-3) (Annexin III) (Lipocortin III) (Placental anticoagulant protein III) (PAP-III) (35-alpha calcimedlin)                                                                                                                                         | Anxa3 (Anx3)                | 0   | 26  | 0  | 5  |
| P10107 | Annexin A1 (Annexin-1) (Annexin I) (Lipocortin I) (Calpactin II) (Chromobindin-9) (p35) (Phospholipase A2 inhibitory protein)                                                                                                                                        | Anxa1 (Anx1) (Lpc-1) (Lpc1) | 0   | 26  | 0  | 6  |
| P35922 | Fragile X mental retardation protein 1 homolog (Protein FMR-1) (FMRP) (mFmr1p)                                                                                                                                                                                       | Fmr1 (Fmr-1)                | 0   | 36  | 0  | 8  |
| P07356 | Annexin A2 (Annexin-2) (Annexin II) (Lipocortin II) (Calpactin I heavy chain) (Chromobindin-8) (p36) (Protein I) (Placental anticoagulant protein IV) (PAP-IV)                                                                                                       | Anxa2 (Anx2) (Cal1h)        | 0   | 51  | 0  | 9  |
| P15806 | Transcription factor E2-alpha (Immunoglobulin enhancer-binding factor E12/E47) (Transcription factor 3) (TCF-3) (Transcription factor A1)                                                                                                                            | Tcf3 (Alf2) (Me2) (Tcfe2a)  | 0   | 28  | 0  | 9  |
| Q8BPU7 | Engulfment and cell motility protein 1 (CED-12 homolog)                                                                                                                                                                                                              | Elmo1                       | 0   | 64  | 0  | 12 |
| Q810T2 | G2/mitotic-specific cyclin-B3                                                                                                                                                                                                                                        | Ccnb3 (Cycb3)               | 0   | 29  | 0  | 22 |
| Q60664 | Lymphoid-restricted membrane protein (Protein Jaw1) [Cleaved into: Processed lymphoid-restricted membrane protein]                                                                                                                                                   | Lrmp (Jaw1)                 | 0   | 34  | 0  | 28 |
| P14873 | Microtubule-associated protein 1B (MAP-1B) (MAP1.2) (MAP1(X)) [Cleaved into: MAP1 light chain LC1]                                                                                                                                                                   | Map1b (Mtap1b) (Mtap5)      | 0   | 490 | 0  | 44 |
| P48036 | Annexin A5 (Annexin-5) (Annexin V) (Lipocortin V) (Endonexin II) (Calphobindin I) (CBP-I) (Placental anticoagulant protein I) (PAP-I) (Placental anticoagulant protein 4) (PP4) (Thromboplastin inhibitor) (Vascular anticoagulant-alpha) (VAC-alpha) (Anchorin CII) | Anxa5 (Anx5)                | 36  | 202 | 5  | 16 |
| Q61553 | Fascin (Singed-like protein)                                                                                                                                                                                                                                         | Fscn1 (Fan1) (Snl)          | 117 | 307 | 10 | 21 |



|                     |                                           |                                                                                                   |                           |    |    |   |   |
|---------------------|-------------------------------------------|---------------------------------------------------------------------------------------------------|---------------------------|----|----|---|---|
| Pre-mRNA processing | O35963                                    | Ras-related protein Rab-33B                                                                       | Rab33b                    | 0  | 53 | 0 | 1 |
|                     | Q5FW52                                    | Uncharacterized protein C6orf142 homolog                                                          |                           | 0  | 25 | 0 | 2 |
|                     | P10922                                    | Histone H1.0 (Histone H1(0)) (Histone H1') (MyD196)                                               | H1f0 (H1fv)               | 0  | 35 | 0 | 2 |
|                     | Q9Z2X1                                    | Heterogeneous nuclear ribonucleoprotein F (hnRNP F)                                               | Hnrnpf (Hnrpf)            | 0  | 35 | 0 | 2 |
|                     | Q91WW3                                    | Mas-related G-protein coupled receptor member A3                                                  | Mrgpra3 (Mrga3)           | 0  | 26 | 0 | 3 |
|                     | Q504M8                                    | Ras-related protein Rab-26                                                                        | Rab26                     | 0  | 53 | 0 | 3 |
|                     | P62746                                    | Rho-related GTP-binding protein RhoB                                                              | Rhob (Arhb)               | 0  | 82 | 0 | 3 |
|                     | Q62048                                    | Astrocytic phosphoprotein PEA-15                                                                  | Pea15 (Pea15a)            | 0  | 38 | 0 | 4 |
|                     | P46638                                    | Ras-related protein Rab-11B                                                                       | Rab11b                    | 0  | 49 | 0 | 4 |
|                     | Q7TPD3                                    | Roundabout homolog 2                                                                              | Robo2 (Kiaa1568)          | 0  | 30 | 0 | 4 |
|                     | O35490                                    | Betaine--homocysteine S-methyltransferase 1 (EC 2.1.1.5)                                          | Bhmt                      | 0  | 28 | 0 | 5 |
|                     | Q8BWG9                                    | Calcium release-activated calcium channel protein 1 (Protein orai-1) (Transmembrane protein 142A) | Orai1 (Cracm1) (Tmem142a) | 0  | 33 | 0 | 5 |
|                     | Q60668                                    | Heterogeneous nuclear ribonucleoprotein D0 (hnRNP D0) (AU-rich element RNA-binding protein 1)     | Hnrnpd (Auf1) (Hnrpd)     | 0  | 34 | 0 | 5 |
|                     | Q8BG05                                    | Heterogeneous nuclear ribonucleoprotein A3 (hnRNP A3)                                             | Hnrnpa3 (Hnrpa3)          | 0  | 34 | 0 | 5 |
|                     | Q9ER58                                    | Testican-2 (SPARC/osteonectin, CWCV, and Kazal-like domains proteoglycan 2)                       | Spock2 (Ticn2)            | 0  | 26 | 0 | 5 |
| Q80WB0              | Uncharacterized protein C20orf195 homolog |                                                                                                   | 0                         | 25 | 0  | 6 |   |

|        |                                                                                                                                                                                                                                            |                                  |   |    |   |    |
|--------|--------------------------------------------------------------------------------------------------------------------------------------------------------------------------------------------------------------------------------------------|----------------------------------|---|----|---|----|
| Q9EQ06 | Estradiol 17-beta-dehydrogenase 11 (EC 1.1.1.62) (17-beta-hydroxysteroid dehydrogenase 11) (17-beta-HSD 11) (17betaHSD11) (17bHSD11) (17-beta-HSD XI) (17betaHSDXI) (Dehydrogenase/reductase SDR family member 8)                          | Hsd17b11 (Dhrs8) (Pan1b)         | 0 | 26 | 0 | 6  |
| Q64356 | Seminal vesicle secretory protein 6 (Seminal vesicle secretory protein VI) (SVS VI) (Seminal vesicle protein 6) (SVSP99)                                                                                                                   | Svs6 (Svp6)                      | 0 | 26 | 0 | 6  |
| Q99K48 | Non-POU domain-containing octamer-binding protein (NonO protein)                                                                                                                                                                           | Nono                             | 0 | 41 | 0 | 7  |
| Q8BMQ2 | General transcription factor 3C polypeptide 4 (EC 2.3.1.48) (Transcription factor IIIC subunit delta) (TF3C-delta) (TFIIIC 90 kDa subunit) (TFIIIC 90)                                                                                     | Gtf3c4                           | 0 | 46 | 0 | 9  |
| P15806 | Transcription factor E2-alpha (Immunoglobulin enhancer-binding factor E12/E47) (Transcription factor 3) (TCF-3) (Transcription factor A1)                                                                                                  | Tcf3 (Alf2) (Me2) (Tcfe2a)       | 0 | 28 | 0 | 9  |
| Q80X17 | Vomeromodulin                                                                                                                                                                                                                              |                                  | 0 | 29 | 0 | 9  |
| Q9DAA3 | Uncharacterized protein C4orf36 homolog                                                                                                                                                                                                    |                                  | 0 | 26 | 0 | 11 |
| P35276 | Ras-related protein Rab-3D                                                                                                                                                                                                                 | Rab3d                            | 0 | 53 | 0 | 11 |
| Q400C8 | Archaemetzincin-2 (EC 3.-.-) (Archeobacterial metalloproteinase-like protein 2)                                                                                                                                                            | Amz2                             | 0 | 34 | 0 | 12 |
| Q60875 | Rho guanine nucleotide exchange factor 2 (Guanine nucleotide exchange factor H1) (GEF-H1) (Lymphoid blast crisis-like 1) (LBC'S first cousin) (Oncogene LFC) (Rhobin)                                                                      | Arhgef2 (Kiaa0651) (Lbcl1) (Lfc) | 0 | 31 | 0 | 12 |
| Q63844 | Mitogen-activated protein kinase 3 (EC 2.7.11.24) (Extracellular signal-regulated kinase 1) (ERK-1) (Insulin-stimulated MAP2 kinase) (MAP kinase 1) (MAPK 1) (p44-ERK1) (ERT2) (p44-MAPK) (Microtubule-associated protein 2 kinase) (MNK1) | Mapk3 (Erk1) (Prkm3)             | 0 | 37 | 0 | 14 |

|        |                                                                                                                                                                                    |                                 |    |     |   |    |
|--------|------------------------------------------------------------------------------------------------------------------------------------------------------------------------------------|---------------------------------|----|-----|---|----|
| Q8JZQ9 | Eukaryotic translation initiation factor 3 subunit B (eIF3b) (Eukaryotic translation initiation factor 3 subunit 9) (eIF-3-eta) (eIF3 p116)                                        | Eif3b (Eif3s9)                  | 0  | 52  | 0 | 16 |
| Q8BJL1 | F-box only protein 30                                                                                                                                                              | Fbxo30                          | 0  | 39  | 0 | 16 |
| P05622 | Beta-type platelet-derived growth factor receptor (EC 2.7.10.1) (PDGF-R-beta) (CD140 antigen-like family member B) (CD antigen CD140b)                                             | Pdgfrb (Pdgfr)                  | 0  | 34  | 0 | 16 |
| Q80TG1 | Uncharacterized protein KIAA1267                                                                                                                                                   | Kiaa1267                        | 0  | 36  | 0 | 18 |
| P63085 | Mitogen-activated protein kinase 1 (EC 2.7.11.24) (Extracellular signal-regulated kinase 2) (ERK-2) (Mitogen-activated protein kinase 2) (MAP kinase 2) (MAPK 2) (p42-MAPK) (ERT1) | Mapk1 (Erk2) (Mapk) (Prkm1)     | 0  | 112 | 0 | 19 |
| Q91YR7 | Pre-mRNA-processing factor 6 (U5 snRNP-associated 102 kDa protein) (U5-102 kDa protein) (PRP6 homolog)                                                                             | Prpf6                           | 0  | 25  | 0 | 22 |
| Q9QXL2 | Kinesin-like protein KIF21A                                                                                                                                                        | Kif21a (Kiaa1708)               | 0  | 45  | 0 | 23 |
| Q8C636 | Spermatogenesis-associated protein 16                                                                                                                                              | Spata16                         | 0  | 41  | 0 | 24 |
| Q8BHZ4 | Zinc finger protein 592 (Zfp-592)                                                                                                                                                  | Znf592 (Kiaa0211) (Zfp592)      | 0  | 26  | 0 | 24 |
| Q9D9B4 | Leucine-rich repeat-containing protein C10orf11 homolog                                                                                                                            |                                 | 20 | 36  | 1 | 8  |
| Q3UA16 | Kinetochores protein Spc25                                                                                                                                                         | Spc25 (Spbc25)                  | 16 | 81  | 6 | 15 |
| Q7SIG6 | Development and differentiation-enhancing factor 2 (Pyk2 C-terminus-associated protein) (PAP) (Paxillin-associated protein with ARFGAP activity 3) (PAG3)                          | Ddef2 (Gm1523) (Gm592)          | 36 | 43  | 7 | 17 |
| Q99020 | Heterogeneous nuclear ribonucleoprotein A/B (hnRNP A/B) (CArG-binding factor-A) (CBF-A)                                                                                            | Hnrpab (Cbf-a) (Cgbfa) (Hnrpab) | 56 | 138 | 5 | 11 |
| Q8VDX6 | Transmembrane protein 5                                                                                                                                                            | Tmem5                           | 22 | 28  | 5 | 11 |

|                                        | Q80YX1    | Tenascin (TN) (Tenascin-C) (TN-C) (Hexabrachion)                                                                                    | Tnc (Hxb)                | 80            | 200           | 22              | 45              |
|----------------------------------------|-----------|-------------------------------------------------------------------------------------------------------------------------------------|--------------------------|---------------|---------------|-----------------|-----------------|
|                                        | Q99MS8    | Tubulin polyglutamylase complex subunit 1 (PGs1) (p32)                                                                              | Gtrgeo22                 | 26            | 20            | 2               | 4               |
|                                        | Q62318    | Transcription intermediary factor 1-beta (TIF1-beta) (Tripartite motif-containing protein 28) (KRAB-A-interacting protein) (KRIP-1) | Trim28 (Krip1) (Tif1b)   | 24            | 84            | 10              | 20              |
| Enriched Molecular Function by Panther |           |                                                                                                                                     |                          |               |               |                 |                 |
| Term                                   | Accession | Protein names                                                                                                                       | Genes                    | prot_score_WT | prot_score_KO | prot_matches_WT | prot_matches_KO |
| G-protein                              | O35963    | Ras-related protein Rab-33B                                                                                                         | Rab33b                   | 0             | 53            | 0               | 1               |
|                                        | Q91V41    | Ras-related protein Rab-14                                                                                                          | Rab14                    | 0             | 53            | 0               | 2               |
|                                        | Q9JKM7    | Ras-related protein Rab-37                                                                                                          | Rab37                    | 0             | 53            | 0               | 2               |
|                                        | P62823    | Ras-related protein Rab-3C                                                                                                          | Rab3c                    | 0             | 53            | 0               | 2               |
|                                        | P61027    | Ras-related protein Rab-10                                                                                                          | Rab10                    | 0             | 82            | 0               | 3               |
|                                        | Q504M8    | Ras-related protein Rab-26                                                                                                          | Rab26                    | 0             | 53            | 0               | 3               |
|                                        | P63011    | Ras-related protein Rab-3A                                                                                                          | Rab3a                    | 0             | 53            | 0               | 3               |
|                                        | Q9CZT8    | Ras-related protein Rab-3B                                                                                                          | Rab3b                    | 0             | 53            | 0               | 3               |
|                                        | P62746    | Rho-related GTP-binding protein RhoB                                                                                                | Rhob (Arhb)              | 0             | 82            | 0               | 3               |
|                                        | Q923S9    | Ras-related protein Rab-30                                                                                                          | Rab30 (Rsb30)            | 0             | 53            | 0               | 4               |
|                                        | Q8CG50    | Ras-related protein Rab-43                                                                                                          | Rab43                    | 0             | 53            | 0               | 4               |
|                                        | P46638    | Ras-related protein Rab-11B                                                                                                         | Rab11b                   | 0             | 49            | 0               | 4               |
|                                        | Q8BHD0    | Ras-related protein Rab-39A (Rab-39)                                                                                                | Rab39 (Rab39a)           | 0             | 53            | 0               | 4               |
|                                        | Q8BHC1    | Ras-related protein Rab-39B                                                                                                         | Rab39b                   | 0             | 53            | 0               | 5               |
|                                        | Q8BG32    | 26S proteasome non-ATPase regulatory subunit 11 (26S proteasome regulatory subunit S9) (26S proteasome regulatory subunit p44.5)    | Psm11                    | 0             | 30            | 0               | 6               |
|                                        | Q9D1G1    | Ras-related protein Rab-1B                                                                                                          | Rab1b                    | 0             | 91            | 0               | 8               |
|                                        | P35279    | Ras-related protein Rab-6A (Rab-6)                                                                                                  | Rab6a (Rab6) (MNCb-1660) | 0             | 76            | 0               | 9               |

|                            |        |                                                                                                                    |                       |    |     |   |    |
|----------------------------|--------|--------------------------------------------------------------------------------------------------------------------|-----------------------|----|-----|---|----|
|                            | Q8C1B7 | Septin-11                                                                                                          | Sept11<br>(D5Ert606e) | 0  | 30  | 0 | 9  |
|                            | Q8BSL7 | ADP-ribosylation factor 2                                                                                          | Arf2                  | 0  | 270 | 0 | 10 |
|                            | P35283 | Ras-related protein Rab-12 (Rab-13)                                                                                | Rab12                 | 0  | 53  | 0 | 11 |
|                            | P35276 | Ras-related protein Rab-3D                                                                                         | Rab3d                 | 0  | 53  | 0 | 11 |
|                            | P84084 | ADP-ribosylation factor 5                                                                                          | Arf5                  | 0  | 210 | 0 | 13 |
|                            | Q9WVL3 | Solute carrier family 12 member 7 (Electroneutral potassium-chloride cotransporter 4) (K-Cl cotransporter 4)       | Slc12a7<br>(Kcc4)     | 0  | 27  | 0 | 24 |
|                            | Q60664 | Lymphoid-restricted membrane protein (Protein Jaw1) [Cleaved into: Processed lymphoid-restricted membrane protein] | Lrmp<br>(Jaw1)        | 0  | 34  | 0 | 28 |
|                            | P61750 | ADP-ribosylation factor 4                                                                                          | Arf4                  | 21 | 56  | 2 | 8  |
|                            | P35278 | Ras-related protein Rab-5C                                                                                         | Rab5c                 | 60 | 79  | 4 | 12 |
|                            | P61205 | ADP-ribosylation factor 3                                                                                          | Arf3                  | 32 | 423 | 6 | 17 |
|                            | Q8R1B5 | Complexin-3 (Complexin III) (CPX III)                                                                              | Cplx3                 | 16 | 29  | 2 | 4  |
| Select regulatory molecule | Q35963 | Ras-related protein Rab-33B                                                                                        | Rab33b                | 0  | 53  | 0 | 1  |
|                            | Q91V41 | Ras-related protein Rab-14                                                                                         | Rab14                 | 0  | 53  | 0 | 2  |
|                            | Q9JKM7 | Ras-related protein Rab-37                                                                                         | Rab37                 | 0  | 53  | 0 | 2  |
|                            | P62823 | Ras-related protein Rab-3C                                                                                         | Rab3c                 | 0  | 53  | 0 | 2  |
|                            | P61027 | Ras-related protein Rab-10                                                                                         | Rab10                 | 0  | 82  | 0 | 3  |
|                            | Q504M8 | Ras-related protein Rab-26                                                                                         | Rab26                 | 0  | 53  | 0 | 3  |
|                            | P63011 | Ras-related protein Rab-3A                                                                                         | Rab3a                 | 0  | 53  | 0 | 3  |
|                            | Q9CZT8 | Ras-related protein Rab-3B                                                                                         | Rab3b                 | 0  | 53  | 0 | 3  |
|                            | P62746 | Rho-related GTP-binding protein RhoB                                                                               | Rhob<br>(Arhb)        | 0  | 82  | 0 | 3  |
|                            | Q64G17 | Putative acidic leucine-rich nuclear phosphoprotein 32 family member C                                             | Anp32c                | 0  | 28  | 0 | 4  |
|                            | Q923S9 | Ras-related protein Rab-30                                                                                         | Rab30<br>(Rsb30)      | 0  | 53  | 0 | 4  |
|                            | Q8CG50 | Ras-related protein Rab-43                                                                                         | Rab43                 | 0  | 53  | 0 | 4  |
|                            | P46638 | Ras-related protein Rab-11B                                                                                        | Rab11b                | 0  | 49  | 0 | 4  |
|                            | Q8BHD0 | Ras-related protein Rab-39A (Rab-39)                                                                               | Rab39<br>(Rab39a)     | 0  | 53  | 0 | 4  |

|        |                                                                                                                                                                       |                                  |   |     |   |    |
|--------|-----------------------------------------------------------------------------------------------------------------------------------------------------------------------|----------------------------------|---|-----|---|----|
| P09103 | Protein disulfide-isomerase (PDI) (EC 5.3.4.1) (Prolyl 4-hydroxylase subunit beta) (Cellular thyroid hormone-binding protein) (p55) (Erp59)                           | P4hb (Pdia1)                     | 0 | 28  | 0 | 5  |
| P58389 | Serine/threonine-protein phosphatase 2A regulatory subunit B' (PP2A, subunit B', PR53 isoform) (Phosphotyrosyl phosphatase activator) (PTPA)                          | Ppp2r4 (Ptpa)                    | 0 | 32  | 0 | 5  |
| Q8BHC1 | Ras-related protein Rab-39B                                                                                                                                           | Rab39b                           | 0 | 53  | 0 | 5  |
| Q9ER58 | Testican-2 (SPARC/osteonectin, CWCV, and Kazal-like domains proteoglycan 2)                                                                                           | Spock2 (Ticn2)                   | 0 | 26  | 0 | 5  |
| P27612 | Phospholipase A-2-activating protein (PLAP)                                                                                                                           | Plaa (Plap)                      | 0 | 27  | 0 | 6  |
| Q3UM45 | Protein phosphatase 1 regulatory subunit 7 (Protein phosphatase 1 regulatory subunit 22)                                                                              | Ppp1r7 (Sds22)                   | 0 | 35  | 0 | 6  |
| P50396 | Rab GDP dissociation inhibitor alpha (Rab GDI alpha) (Guanosine diphosphate dissociation inhibitor 1) (GDI-1)                                                         | Gdi1 (Rabgdi)                    | 0 | 56  | 0 | 7  |
| P57722 | Poly(rC)-binding protein 3 (Alpha-CP3)                                                                                                                                | Pcbp3                            | 0 | 122 | 0 | 8  |
| Q9D1G1 | Ras-related protein Rab-1B                                                                                                                                            | Rab1b                            | 0 | 91  | 0 | 8  |
| P35279 | Ras-related protein Rab-6A (Rab-6)                                                                                                                                    | Rab6a (Rab6) (MNCb-1660)         | 0 | 76  | 0 | 9  |
| Q8BSL7 | ADP-ribosylation factor 2                                                                                                                                             | Arf2                             | 0 | 270 | 0 | 10 |
| P35283 | Ras-related protein Rab-12 (Rab-13)                                                                                                                                   | Rab12                            | 0 | 53  | 0 | 11 |
| P35276 | Ras-related protein Rab-3D                                                                                                                                            | Rab3d                            | 0 | 53  | 0 | 11 |
| Q99MK9 | Ras association domain-containing protein 1 (Protein 123F2)                                                                                                           | Rassf1                           | 0 | 29  | 0 | 11 |
| Q60875 | Rho guanine nucleotide exchange factor 2 (Guanine nucleotide exchange factor H1) (GEF-H1) (Lymphoid blast crisis-like 1) (LBC'S first cousin) (Oncogene LFC) (Rhobin) | Arhgef2 (Kiaa0651) (Lbcl1) (Lfc) | 0 | 31  | 0 | 12 |
| P14685 | 26S proteasome non-ATPase regulatory subunit 3 (26S proteasome regulatory subunit S3) (Proteasome subunit p58) (Transplantation antigen P91A) (Tum-P91A antigen)      | Psm3 (P91a) (Tstap91a)           | 0 | 25  | 0 | 12 |

|                     |        |                                                                                                                                   |                              |    |     |    |    |
|---------------------|--------|-----------------------------------------------------------------------------------------------------------------------------------|------------------------------|----|-----|----|----|
|                     | P84084 | ADP-ribosylation factor 5                                                                                                         | Arf5                         | 0  | 210 | 0  | 13 |
|                     | Q80TE4 | Signal-induced proliferation-associated 1-like protein 2 (SIPA1-like protein 2)                                                   | Sipa1l2 (Kiaa0545)           | 0  | 36  | 0  | 16 |
|                     | Q3UTH8 | Rho guanine nucleotide exchange factor 9 (Rac/Cdc42 guanine nucleotide exchange factor 9) (Collybistin)                           | Arhgef9 (Kiaa0424)           | 0  | 31  | 0  | 17 |
|                     | Q810T2 | G2/mitotic-specific cyclin-B3                                                                                                     | Ccnb3 (Cycb3)                | 0  | 29  | 0  | 22 |
|                     | Q8BIK4 | Dedicator of cytokinesis protein 9 (Cdc42 guanine nucleotide exchange factor zizimin-1)                                           | Dock9 (D14Wsu89e) (Kiaa1058) | 0  | 28  | 0  | 25 |
|                     | P61750 | ADP-ribosylation factor 4                                                                                                         | Arf4                         | 21 | 56  | 2  | 8  |
|                     | P35278 | Ras-related protein Rab-5C                                                                                                        | Rab5c                        | 60 | 79  | 4  | 12 |
|                     | P61205 | ADP-ribosylation factor 3                                                                                                         | Arf3                         | 32 | 423 | 6  | 17 |
|                     | Q61037 | Tuberin (Tuberous sclerosis 2 homolog protein)                                                                                    | Tsc2                         | 22 | 46  | 38 | 91 |
|                     | P34022 | Ran-specific GTPase-activating protein (Ran-binding protein 1) (RANBP1) (Hpal1 tiny fragments locus 9a protein)                   | Ranbp1 (Htf9-a) (Htf9a)      | 49 | 24  | 5  | 10 |
| Protein phosphatase | Q9D7I8 | Protein FAM83D                                                                                                                    | Fam83d                       | 0  | 25  | 0  | 3  |
|                     | P63087 | Serine/threonine-protein phosphatase PP1-gamma catalytic subunit (PP-1G) (EC 3.1.3.16) (Protein phosphatase 1C catalytic subunit) | Ppp1cc                       | 0  | 57  | 0  | 5  |
|                     | P17408 | Oncogene tlm                                                                                                                      | Tlm                          | 0  | 26  | 0  | 5  |
|                     | P63330 | Serine/threonine-protein phosphatase 2A catalytic subunit alpha isoform (PP2A-alpha) (EC 3.1.3.16)                                | Ppp2ca                       | 0  | 101 | 0  | 6  |
|                     | P48967 | M-phase inducer phosphatase 3 (EC 3.1.3.48) (Dual specificity phosphatase Cdc25C)                                                 | Cdc25c (Cdc25m1)             | 0  | 33  | 0  | 7  |
|                     | P57722 | Poly(rC)-binding protein 3 (Alpha-CP3)                                                                                            | Pcbp3                        | 0  | 122 | 0  | 8  |
|                     | P35235 | Tyrosine-protein phosphatase non-receptor type 11 (EC 3.1.3.48) (Protein-tyrosine phosphatase SYP) (SH-PTP2) (SHP-2) (Shp2)       | Ptpn11                       | 0  | 40  | 0  | 12 |

|         |        |                                                                                                                                                                                                                                     |                             |    |    |   |    |
|---------|--------|-------------------------------------------------------------------------------------------------------------------------------------------------------------------------------------------------------------------------------------|-----------------------------|----|----|---|----|
|         | Q7M6U3 | Testis-expressed protein 14 (Testis-expressed sequence 14)                                                                                                                                                                          | Tex14                       | 0  | 28 | 0 | 14 |
|         | Q922D8 | C-1-tetrahydrofolate synthase, cytoplasmic (C1-THF synthase) [Includes: Methylenetetrahydrofolate dehydrogenase (EC 1.5.1.5); Methenyltetrahydrofolate cyclohydrolase (EC 3.5.4.9); Formyltetrahydrofolate synthetase (EC 6.3.4.3)] | Mthfd1                      | 0  | 25 | 0 | 16 |
|         | P83510 | Traf2 and NCK-interacting protein kinase (EC 2.7.11.1)                                                                                                                                                                              | Tnik (Kiaa0551)             | 0  | 54 | 0 | 17 |
|         | Q924W5 | Structural maintenance of chromosomes protein 6 (mSMC6)                                                                                                                                                                             | Smc6 (Kiaa4103) (Smc6l1)    | 0  | 38 | 0 | 21 |
|         | Q8C2E7 | Strumpellin                                                                                                                                                                                                                         | Kiaa0196                    | 0  | 40 | 0 | 22 |
|         | Q60664 | Lymphoid-restricted membrane protein (Protein Jaw1) [Cleaved into: Processed lymphoid-restricted membrane protein]                                                                                                                  | Lrmp (Jaw1)                 | 0  | 34 | 0 | 28 |
|         | O35239 | Tyrosine-protein phosphatase non-receptor type 9 (EC 3.1.3.48) (Protein-tyrosine phosphatase MEG2) (PTPase-MEG2)                                                                                                                    | Ptpn9                       | 17 | 29 | 2 | 4  |
| Annexin | O70423 | Membrane primary amine oxidase (EC 1.4.3.21) (Copper amine oxidase) (Semicarbazide-sensitive amine oxidase) (SSAO) (Vascular adhesion protein 1) (VAP-1)                                                                            | Aoc3 (Vap1)                 | 0  | 35 | 0 | 4  |
|         | O35639 | Annexin A3 (Annexin-3) (Annexin III) (Lipocortin III) (Placental anticoagulant protein III) (PAP-III) (35-alpha calcimedlin)                                                                                                        | Anxa3 (Anx3)                | 0  | 26 | 0 | 5  |
|         | P10107 | Annexin A1 (Annexin-1) (Annexin I) (Lipocortin I) (Calpactin II) (Chromobindin-9) (p35) (Phospholipase A2 inhibitory protein)                                                                                                       | Anxa1 (Anx1) (Lpc-1) (Lpc1) | 0  | 26 | 0 | 6  |



|                |        |                                                                                                                                                                                                                                                                      |                                      |    |     |   |    |
|----------------|--------|----------------------------------------------------------------------------------------------------------------------------------------------------------------------------------------------------------------------------------------------------------------------|--------------------------------------|----|-----|---|----|
|                | Q9R1T2 | SUMO-activating enzyme subunit 1 (Ubiquitin-like 1-activating enzyme E1A)                                                                                                                                                                                            | Sae1 (Aos1) (Sua1) (Ubl1a1) (Uble1a) | 0  | 62  | 0 | 6  |
|                | P97384 | Annexin A11 (Annexin-11) (Annexin XI) (Calcyclin-associated annexin 50) (CAP-50)                                                                                                                                                                                     | Anxa11 (Anx11)                       | 0  | 26  | 0 | 9  |
|                | P07356 | Annexin A2 (Annexin-2) (Annexin II) (Lipocortin II) (Calpactin I heavy chain) (Chromobindin-8) (p36) (Protein I) (Placental anticoagulant protein IV) (PAP-IV)                                                                                                       | Anxa2 (Anx2) (Cal1h)                 | 0  | 51  | 0 | 9  |
|                | P60762 | Mortality factor 4-like protein 1 (MORF-related gene 15 protein) (Transcription factor-like protein MRG15) (Testis-expressed gene 189 protein)                                                                                                                       | Morf411 (Mrg15) (Tex189)             | 0  | 33  | 0 | 9  |
|                | P56960 | Exosome component 10 (Polymyositis/scleroderma autoantigen 2 homolog) (Autoantigen PM/Scl 2 homolog)                                                                                                                                                                 | Exosc10 (Pmscl2)                     | 0  | 27  | 0 | 12 |
|                | P97855 | Ras GTPase-activating protein-binding protein 1 (EC 3.6.1.-) (G3BP-1) (ATP-dependent DNA helicase VIII) (HDH-VIII) (GAP SH3 domain-binding protein 1)                                                                                                                | G3bp1 (G3bp)                         | 0  | 75  | 0 | 15 |
|                | P48036 | Annexin A5 (Annexin-5) (Annexin V) (Lipocortin V) (Endonexin II) (Calphobindin I) (CBP-I) (Placental anticoagulant protein I) (PAP-I) (Placental anticoagulant protein 4) (PP4) (Thromboplastin inhibitor) (Vascular anticoagulant-alpha) (VAC-alpha) (Anchorin CII) | Anxa5 (Anx5)                         | 36 | 202 | 5 | 16 |
| Other receptor | Q60654 | Killer cell lectin-like receptor 7 (T-cell surface glycoprotein Ly-49G) (Lymphocyte antigen 49g) (Ly-49g)                                                                                                                                                            | Klra7 (Ly-49g) (Ly49g) (Ly49g4)      | 0  | 33  | 0 | 2  |
|                | Q61211 | Ligatin                                                                                                                                                                                                                                                              | Lgtn                                 | 0  | 36  | 0 | 5  |
|                | P00375 | Dihydrofolate reductase (EC 1.5.1.3)                                                                                                                                                                                                                                 | Dhfr                                 | 0  | 38  | 0 | 8  |
|                | Q8K2Y7 | 39S ribosomal protein L47, mitochondrial (L47mt) (MRP-L47)                                                                                                                                                                                                           | Mrpl47                               | 0  | 26  | 0 | 8  |

|        |                                                                                                                                                                                                                                     |                          |    |     |    |    |
|--------|-------------------------------------------------------------------------------------------------------------------------------------------------------------------------------------------------------------------------------------|--------------------------|----|-----|----|----|
| Q88907 | E3 SUMO-protein ligase PIAS1 (Protein inhibitor of activated STAT protein 1) (DEAD/H box-binding protein 1)                                                                                                                         | Pias1 (Ddxbp1)           | 0  | 31  | 0  | 9  |
| Q3TPE9 | Ankyrin repeat and MYND domain-containing protein 2                                                                                                                                                                                 | Ankmy2                   | 0  | 25  | 0  | 11 |
| Q9DAA3 | Uncharacterized protein C4orf36 homolog                                                                                                                                                                                             |                          | 0  | 26  | 0  | 11 |
| Q922D8 | C-1-tetrahydrofolate synthase, cytoplasmic (C1-THF synthase) [Includes: Methylenetetrahydrofolate dehydrogenase (EC 1.5.1.5); Methenyltetrahydrofolate cyclohydrolase (EC 3.5.4.9); Formyltetrahydrofolate synthetase (EC 6.3.4.3)] | Mthfd1                   | 0  | 25  | 0  | 16 |
| P08071 | Lactotransferrin (Lactoferrin) (EC 3.4.21.-)                                                                                                                                                                                        | Ltf                      | 0  | 25  | 0  | 16 |
| Q9Z2T6 | Keratin, type II cuticular Hb5 (Type II hair keratin Hb5) (Keratin-85) (K85)                                                                                                                                                        | Krt85 (Krt2-18) (Krthb5) | 36 | 193 | 14 | 33 |
| P97861 | Keratin, type II cuticular Hb6 (Type II hair keratin Hb6) (Keratin-86) (K86)                                                                                                                                                        | Krt86 (Krt2-10) (Krthb6) | 36 | 183 | 14 | 31 |
