# Supplementary material
Source: PubMed Central journal article supplement (PMC2818196)
Supplement: supp_123_4_586__5.pdf [file supp_123_4_586__5.pdf]

| Table S5. List of proteins that have similar levels in Dicer-deficient and control NSCs. |                                     |                                                                                                                        |                            |               |               |                 |                 |
|------------------------------------------------------------------------------------------|-------------------------------------|------------------------------------------------------------------------------------------------------------------------|----------------------------|---------------|---------------|-----------------|-----------------|
| Enriched Kegg pathway                                                                    |                                     |                                                                                                                        |                            |               |               |                 |                 |
| Term                                                                                     | Accession                           | Protein names                                                                                                          | Genes                      | prot_score_WT | prot_score_KO | prot_matches_WT | prot_matches_KO |
| Ribosome                                                                                 | P35980                              | 60S ribosomal protein L18                                                                                              | Rpl18                      | 32            | 22            | 51              | 85              |
|                                                                                          | P62082                              | 40S ribosomal protein S7                                                                                               | Rps7                       | 104           | 126           | 9               | 14              |
|                                                                                          | O55142                              | 60S ribosomal protein L35a                                                                                             | Rpl35a                     | 24            | 50            | 4               | 6               |
|                                                                                          | P62270                              | 40S ribosomal protein S18 (Ke-3) (Ke3)                                                                                 | Rps18                      | 210           | 209           | 15              | 17              |
|                                                                                          | P62908                              | 40S ribosomal protein S3                                                                                               | Rps3                       | 778           | 762           | 39              | 44              |
|                                                                                          | P19253                              | 60S ribosomal protein L13a (Transplantation antigen P198) (Tum-P198 antigen)                                           | Rpl13a (P198) (Tstap198-7) | 27            | 65            | 9               | 10              |
|                                                                                          | P62242                              | 40S ribosomal protein S8                                                                                               | Rps8                       | 479           | 372           | 18              | 19              |
|                                                                                          | P62281                              | 40S ribosomal protein S11                                                                                              | Rps11                      | 166           | 132           | 27              | 28              |
|                                                                                          | Q9CPR4                              | 60S ribosomal protein L17                                                                                              | Rpl17                      | 187           | 135           | 15              | 14              |
|                                                                                          | P67984                              | 60S ribosomal protein L22 (Heparin-binding protein HBp15)                                                              | Rpl22                      | 59            | 48            | 7               | 6               |
|                                                                                          | P35979                              | 60S ribosomal protein L12                                                                                              | Rpl12                      | 208           | 389           | 14              | 12              |
|                                                                                          | Q9CZM2                              | 60S ribosomal protein L15                                                                                              | Rpl15                      | 225           | 107           | 21              | 18              |
|                                                                                          | Q6ZWN5                              | 40S ribosomal protein S9                                                                                               | Rps9                       | 459           | 248           | 47              | 40              |
|                                                                                          | P14131                              | 40S ribosomal protein S16                                                                                              | Rps16                      | 160           | 126           | 19              | 16              |
|                                                                                          | P14206                              | 40S ribosomal protein SA (Laminin receptor 1) (p40) (34/67 kDa laminin receptor) (37 kDa oncofetal antigen) (OFA/iLRP) | Rpsa (Lamr1) (P40-8)       | 131           | 112           | 11              | 9               |
|                                                                                          | P12970                              | 60S ribosomal protein L7a (Surfeit locus protein 3)                                                                    | Rpl7a (Surf-3) (Surf3)     | 111           | 31            | 15              | 12              |
|                                                                                          | P62852                              | 40S ribosomal protein S25                                                                                              | Rps25                      | 101           | 100           | 15              | 12              |
|                                                                                          | Q8BP67                              | 60S ribosomal protein L24                                                                                              | Rpl24                      | 354           | 214           | 24              | 19              |
|                                                                                          | P62754                              | 40S ribosomal protein S6 (Phosphoprotein NP33)                                                                         | Rps6                       | 127           | 283           | 19              | 15              |
|                                                                                          | P63325                              | 40S ribosomal protein S10                                                                                              | Rps10                      | 468           | 168           | 42              | 33              |
| P62702                                                                                   | 40S ribosomal protein S4, X isoform | Rps4x (Rps4)                                                                                                           | 402                        | 304           | 30            | 23              |                 |
| P62751                                                                                   | 60S ribosomal protein L23a          | Rpl23a                                                                                                                 | 75                         | 49            | 16            | 12              |                 |
| P62264                                                                                   | 40S ribosomal protein S14           | Rps14                                                                                                                  | 163                        | 166           | 15            | 11              |                 |

|                                 |        |                                                                                                                                       |                                                   |      |      |     |     |
|---------------------------------|--------|---------------------------------------------------------------------------------------------------------------------------------------|---------------------------------------------------|------|------|-----|-----|
|                                 | P25444 | 40S ribosomal protein S2 (S4) (LLRep3 protein)                                                                                        | Rps2 (Llrep3) (Rps4)                              | 217  | 50   | 26  | 19  |
|                                 | P62991 | Ubiquitin                                                                                                                             | Rps27a (Uba80) (Ubcep1); Uba52 (Ubcep2); Ubb; Ubc | 61   | 54   | 11  | 8   |
|                                 | Q9CR57 | 60S ribosomal protein L14                                                                                                             | Rpl14                                             | 508  | 391  | 33  | 24  |
|                                 | P27659 | 60S ribosomal protein L3 (J1 protein)                                                                                                 | Rpl3                                              | 192  | 75   | 25  | 18  |
|                                 | P14148 | 60S ribosomal protein L7                                                                                                              | Rpl7                                              | 145  | 52   | 14  | 10  |
|                                 | P14869 | 60S acidic ribosomal protein P0 (L10E)                                                                                                | Rplp0 (Arbp)                                      | 115  | 334  | 28  | 20  |
|                                 | P51410 | 60S ribosomal protein L9                                                                                                              | Rpl9                                              | 187  | 212  | 17  | 12  |
|                                 | Q9CXW4 | 60S ribosomal protein L11                                                                                                             | Rpl11                                             | 72   | 79   | 11  | 7   |
|                                 | P62717 | 60S ribosomal protein L18a                                                                                                            | Rpl18a                                            | 242  | 62   | 21  | 13  |
|                                 | P84099 | 60S ribosomal protein L19                                                                                                             | Rpl19                                             | 39   | 47   | 13  | 8   |
|                                 | P62301 | 40S ribosomal protein S13                                                                                                             | Rps13                                             | 77   | 100  | 23  | 14  |
|                                 | Q9D1R9 | 60S ribosomal protein L34                                                                                                             | Rpl34                                             | 34   | 32   | 10  | 6   |
|                                 | P62900 | 60S ribosomal protein L31                                                                                                             | Rpl31                                             | 124  | 62   | 12  | 7   |
|                                 | P41105 | 60S ribosomal protein L28                                                                                                             | Rpl28                                             | 49   | 41   | 19  | 11  |
|                                 | Q9CZX8 | 40S ribosomal protein S19                                                                                                             | Rps19                                             | 206  | 146  | 19  | 11  |
|                                 | P47963 | 60S ribosomal protein L13 (A52)                                                                                                       | Rpl13                                             | 744  | 379  | 47  | 27  |
|                                 | P97461 | 40S ribosomal protein S5                                                                                                              | Rps5                                              | 89   | 33   | 32  | 18  |
|                                 | P97351 | 40S ribosomal protein S3a                                                                                                             | Rps3a                                             | 899  | 392  | 50  | 26  |
| Arginine and proline metabolism | Q60716 | Prolyl 4-hydroxylase subunit alpha-2 (EC 1.14.11.2) (4-PH alpha-2) (Procollagen-proline,2-oxoglutarate-4-dioxygenase subunit alpha-2) | P4ha2                                             | 22   | 27   | 8   | 10  |
|                                 | Q6P8J7 | Creatine kinase, sarcomeric mitochondrial (EC 2.7.3.2) (S-MtCK)                                                                       | Ckmt2                                             | 50   | 66   | 26  | 26  |
|                                 | P30275 | Creatine kinase, ubiquitous mitochondrial (EC 2.7.3.2) (U-MtCK) (Acidic-type mitochondrial creatine kinase) (Mia-CK)                  | Ckmt1                                             | 205  | 121  | 32  | 30  |
|                                 | Q04447 | Creatine kinase B-type (EC 2.7.3.2) (Creatine kinase B chain) (B-CK)                                                                  | Ckb (Ckbb)                                        | 9079 | 7277 | 434 | 406 |

|                                                | Q8CGC7                                                                        | Bifunctional aminoacyl-tRNA synthetase [Includes: Glutamyl-tRNA synthetase (EC 6.1.1.17) (Glutamate--tRNA ligase); Prolyl-tRNA synthetase (EC 6.1.1.15) (Proline--tRNA ligase)] | Eprs (Qprs)               | 130           | 102           | 32              | 29              |
|------------------------------------------------|-------------------------------------------------------------------------------|---------------------------------------------------------------------------------------------------------------------------------------------------------------------------------|---------------------------|---------------|---------------|-----------------|-----------------|
|                                                | P07310                                                                        | Creatine kinase M-type (EC 2.7.3.2) (Creatine kinase M chain) (M-CK)                                                                                                            | Ckm (Ckmm)                | 73            | 107           | 31              | 28              |
|                                                | Q8C196                                                                        | Carbamoyl-phosphate synthase [ammonia], mitochondrial (EC 6.3.4.16) (Carbamoyl-phosphate synthetase I) (CPSase I)                                                               | Cps1                      | 22            | 25            | 19              | 15              |
| Enriched Biological Processes by Gene Ontology |                                                                               |                                                                                                                                                                                 |                           |               |               |                 |                 |
| Term                                           | Accession                                                                     | Protein names                                                                                                                                                                   | Genes                     | prot_score_WT | prot_score_KO | prot_matches_WT | prot_matches_KO |
| metabolic process                              | P10639                                                                        | Thioredoxin (Trx) (ATL-derived factor) (ADF)                                                                                                                                    | Txn (Txn1)                | 169           | 914           | 22              | 42              |
|                                                | Q3TCT4                                                                        | Ectonucleoside triphosphate diphosphohydrolase 7 (NTPDase 7) (EC 3.6.1.7) (Lysosomal apyrase-like protein 1)                                                                    | Entpd7 (Kiaa4066) (Lalp1) | 16            | 33            | 42              | 80              |
|                                                | P97311                                                                        | DNA replication licensing factor MCM6 (Mis5 homolog)                                                                                                                            | Mcm6 (Mcmd6) (Mis5)       | 110           | 395           | 20              | 38              |
|                                                | Q9CXW3                                                                        | Calcyclin-binding protein (CacyBP) (Siah-interacting protein)                                                                                                                   | Cacybp (Sip)              | 57            | 39            | 7               | 13              |
|                                                | P06745                                                                        | Glucose-6-phosphate isomerase (GPI) (EC 5.3.1.9) (Phosphoglucose isomerase) (PGI) (Phosphohexose isomerase) (PHI) (Neuroleukin) (NLK)                                           | Gpi (Gpi1)                | 39            | 107           | 12              | 22              |
|                                                | Q7TSG3                                                                        | F-box only protein 5 (Early mitotic inhibitor 1)                                                                                                                                | Fbxo5 (Emi1)              | 15            | 27            | 5               | 9               |
|                                                | Q8BYC6                                                                        | Serine/threonine-protein kinase TAO3 (EC 2.7.11.1) (Thousand and one amino acid protein 3)                                                                                      | Taok3                     | 32            | 38            | 9               | 16              |
|                                                | P62962                                                                        | Profilin-1 (Profilin I)                                                                                                                                                         | Pfn1                      | 30            | 93            | 4               | 7               |
| Q64674                                         | Spermidine synthase (SPDSY) (EC 2.5.1.16) (Putrescine aminopropyltransferase) | Srm                                                                                                                                                                             | 55                        | 29            | 4             | 7               |                 |

|        |                                                                                                                                                                                     |                   |      |      |     |     |
|--------|-------------------------------------------------------------------------------------------------------------------------------------------------------------------------------------|-------------------|------|------|-----|-----|
| P18760 | Cofilin-1 (Cofilin, non-muscle isoform)                                                                                                                                             | Cfl1              | 959  | 2552 | 70  | 122 |
| P17742 | Peptidyl-prolyl cis-trans isomerase A (PPIase A) (Rotamase A) (EC 5.2.1.8) (Cyclophilin A) (Cyclosporin A-binding protein) (SP18)                                                   | Ppia              | 855  | 1549 | 38  | 66  |
| Q8QZR5 | Alanine aminotransferase 1 (ALT1) (EC 2.6.1.2) (Glutamic--pyruvic transaminase 1) (Glutamate pyruvate transaminase 1) (GPT 1) (Glutamic--alanine transaminase 1)                    | Gpt (Gpt1)        | 25   | 20   | 15  | 26  |
| Q9Z1R2 | Large proline-rich protein BAT3 (HLA-B-associated transcript 3)                                                                                                                     | Bat3              | 80   | 49   | 15  | 26  |
| Q9R117 | Non-receptor tyrosine-protein kinase TYK2 (EC 2.7.10.2)                                                                                                                             | Tyk2              | 27   | 30   | 15  | 26  |
| Q9D009 | Putative octanoyltransferase, mitochondrial (EC 2.3.1.181) (Octanoyl-[acyl-carrier-protein]-protein N-octanoyltransferase) (Lipoyl/octanoyl transferase) (Lipoate-protein ligase B) |                   | 38   | 42   | 11  | 19  |
| Q8R1S0 | Ubiquinone biosynthesis monooxygenase COQ6 (EC 1.14.13.-)                                                                                                                           | Coq6              | 42   | 92   | 10  | 17  |
| Q9Z129 | ATP-dependent DNA helicase Q1 (EC 3.6.1.-) (DNA-dependent ATPase Q1)                                                                                                                | Recq1 (Recq1)     | 17   | 27   | 13  | 22  |
| Q9ERK4 | Exportin-2 (Exp2) (Importin-alpha re-exporter) (Chromosome segregation 1-like protein)                                                                                              | Cse1l (Xpo2)      | 42   | 153  | 26  | 44  |
| P52480 | Pyruvate kinase isozymes M1/M2 (EC 2.7.1.40) (Pyruvate kinase muscle isozyme)                                                                                                       | Pkm2 (Pk3) (Pykm) | 1954 | 3481 | 138 | 233 |
| Q8CGP2 | Histone H2B type 1-P                                                                                                                                                                | Hist1h2bp         | 436  | 999  | 46  | 77  |
| P57776 | Elongation factor 1-delta (EF-1-delta)                                                                                                                                              | Eef1d             | 109  | 35   | 3   | 5   |
| Q9WTL7 | Acyl-protein thioesterase 2 (EC 3.1.2.-) (Lysophospholipase II) (Lysophospholipase 2) (mLyso II)                                                                                    | Lypla2            | 23   | 49   | 3   | 5   |

|        |                                                                                                                                                                                                                                          |                                                                                                                                                                               |     |      |    |    |
|--------|------------------------------------------------------------------------------------------------------------------------------------------------------------------------------------------------------------------------------------------|-------------------------------------------------------------------------------------------------------------------------------------------------------------------------------|-----|------|----|----|
| P62960 | Nuclease-sensitive element-binding protein 1 (Y-box-binding protein 1) (Y-box transcription factor) (YB-1) (CCAAT-binding transcription factor I subunit A) (CBF-A) (Enhancer factor I subunit A) (EFI-A) (DNA-binding protein B) (DBPB) | Ybx1 (Msy-1) (Msy1) (Nsep1) (Yb1)                                                                                                                                             | 56  | 126  | 6  | 10 |
| P35980 | 60S ribosomal protein L18                                                                                                                                                                                                                | Rpl18                                                                                                                                                                         | 32  | 22   | 51 | 85 |
| P62806 | Histone H4                                                                                                                                                                                                                               | Hist1h4a;<br>Hist1h4b (H4-53); Hist1h4c (H4-12);<br>Hist1h4d;<br>Hist1h4f;<br>Hist1h4h;<br>Hist1h4i;<br>Hist1h4j;<br>Hist1h4k;<br>Hist1h4m;<br>Hist2h4a (Hist2h4);<br>Hist4h4 | 815 | 1617 | 47 | 78 |
| Q64475 | Histone H2B type 1-B (h2B-143)                                                                                                                                                                                                           | Hist1h2bb                                                                                                                                                                     | 436 | 999  | 46 | 75 |
| P15532 | Nucleoside diphosphate kinase A (NDP kinase A) (NDK A) (EC 2.7.4.6) (Tumor metastatic process-associated protein) (Metastasis inhibition factor NM23) (NDPK-A) (nm23-M1)                                                                 | Nme1 (Nm23)                                                                                                                                                                   | 150 | 261  | 8  | 13 |
| Q8BHG1 | Nardilysin (EC 3.4.24.61) (N-arginine dibasic convertase) (NRD convertase) (NRD-C)                                                                                                                                                       | Nrd1                                                                                                                                                                          | 53  | 54   | 13 | 21 |
| P19157 | Glutathione S-transferase P 1 (Gst P1) (EC 2.5.1.18) (GST YF-YF) (GST-piB) (GST class-pi) (Preadipocyte growth factor)                                                                                                                   | Gstp1 (Gstpib)                                                                                                                                                                | 473 | 572  | 10 | 16 |

|        |                                                                                                                                                                  |                              |     |     |    |    |
|--------|------------------------------------------------------------------------------------------------------------------------------------------------------------------|------------------------------|-----|-----|----|----|
| Q8BGT5 | Alanine aminotransferase 2 (ALT2) (EC 2.6.1.2) (Glutamic--pyruvic transaminase 2) (Glutamate pyruvate transaminase 2) (GPT 2) (Glutamic--alanine transaminase 2) | Gpt2 (Aat2)                  | 25  | 20  | 15 | 24 |
| Q6ZWX6 | Eukaryotic translation initiation factor 2 subunit 1 (Eukaryotic translation initiation factor 2 subunit alpha) (eIF-2-alpha) (EIF-2alpha) (EIF-2A)              | Eif2s1 (Eif2a)               | 27  | 177 | 7  | 11 |
| Q80Y17 | Lethal(2) giant larvae protein homolog 1 (LLGL) (Mlgl) (Mgl-1)                                                                                                   | Llgl1 (Llglh)                | 30  | 29  | 7  | 11 |
| Q61990 | Poly(rC)-binding protein 2 (Alpha-CP2) (Putative heterogeneous nuclear ribonucleoprotein X) (hnRNP X) (CTBP) (CBP)                                               | Pcbp2 (Cbp) (HnrnpX) (Hnrpx) | 29  | 194 | 7  | 11 |
| P63001 | Ras-related C3 botulinum toxin substrate 1 (p21-Rac1)                                                                                                            | Rac1                         | 31  | 99  | 7  | 11 |
| P62082 | 40S ribosomal protein S7                                                                                                                                         | Rps7                         | 104 | 126 | 9  | 14 |
| Q9Z1S0 | Mitotic checkpoint serine/threonine-protein kinase BUB1 beta (EC 2.7.11.1) (MAD3/BUB1-related protein kinase) (Mitotic checkpoint kinase MAD3L)                  | Bub1b (Mad3l)                | 20  | 41  | 15 | 23 |
| P63158 | High mobility group protein B1 (High mobility group protein 1) (HMG-1)                                                                                           | Hmgb1 (Hmg-1) (Hmg1)         | 153 | 405 | 25 | 38 |
| Q8K386 | Ras-related protein Rab-15                                                                                                                                       | Rab15                        | 44  | 74  | 4  | 6  |
| O55142 | 60S ribosomal protein L35a                                                                                                                                       | Rpl35a                       | 24  | 50  | 4  | 6  |
| Q9CQY5 | Magnesium transporter protein 1 (MagT1) (Implantation-associated protein) (IAP)                                                                                  | Magt1 (Iag2)                 | 26  | 22  | 8  | 12 |
| P50247 | Adenosylhomocysteinase (AdoHcyase) (EC 3.3.1.1) (S-adenosyl-L-homocysteine hydrolase) (Liver copper-binding protein) (CUBP)                                      | Ahcy                         | 90  | 106 | 10 | 15 |
| Q99K85 | Phosphoserine aminotransferase (PSAT) (EC 2.6.1.52) (Phosphohydroxythreonine aminotransferase) (Endometrial progesterone-induced protein) (EPIP)                 | Psat1 (Psa) (Psat)           | 162 | 541 | 16 | 24 |

|        |                                                                                                                                                                    |                                  |     |     |    |    |
|--------|--------------------------------------------------------------------------------------------------------------------------------------------------------------------|----------------------------------|-----|-----|----|----|
| P83741 | Serine/threonine-protein kinase WNK1 (EC 2.7.11.1) (Protein kinase with no lysine 1) (Protein kinase, lysine-deficient 1)                                          | Wnk1 (Prkwnk1)                   | 56  | 36  | 18 | 27 |
| P53657 | Pyruvate kinase isozymes R/L (EC 2.7.1.40) (L PK)                                                                                                                  | Pklr                             | 144 | 270 | 26 | 38 |
| P97868 | Retinoblastoma-binding protein 6 (p53-associated cellular protein of testis) (Proliferation potential-related protein) (Protein P2P-R)                             | Rbbp6 (P2pr) (Pact)              | 21  | 29  | 24 | 35 |
| Q3THW5 | Histone H2A.V (H2A.F/Z)                                                                                                                                            | H2afv (H2av)                     | 297 | 426 | 11 | 16 |
| P99026 | Proteasome subunit beta type-4 (Proteasome beta chain) (EC 3.4.25.1) (Macropain beta chain) (Multicatalytic endopeptidase complex beta chain) (Proteasome chain 3) | Psmb4 (Lmp3)                     | 93  | 289 | 11 | 16 |
| Q9QZ39 | Alpha-N-acetylgalactosaminide alpha-2,6-sialyltransferase 1 (EC 2.4.99.3) (GalNAc alpha-2,6-sialyltransferase I) (ST6GalNAc I) (Sialyltransferase 7A)              | St6galnac1 (Siat7a)              | 27  | 18  | 11 | 16 |
| P60335 | Poly(rC)-binding protein 1 (Alpha-CP1) (hnRNP-E1)                                                                                                                  | Pcbp1                            | 56  | 350 | 9  | 13 |
| P35761 | Dual specificity protein kinase TTK (ESK) (PYT) (EC 2.7.12.1)                                                                                                      | Ttk (Esk)                        | 14  | 34  | 9  | 13 |
| Q8BVI4 | Dihydropteridine reductase (EC 1.5.1.34) (HDHPR) (Quinoid dihydropteridine reductase)                                                                              | Qdpr (Dhpr)                      | 144 | 277 | 7  | 10 |
| O70251 | Elongation factor 1-beta (EF-1-beta)                                                                                                                               | Eef1b (Eef1b2)                   | 39  | 102 | 7  | 10 |
| Q00342 | FL cytokine receptor (EC 2.7.10.1) (Tyrosine-protein kinase receptor flk-2) (Fetal liver kinase 2) (Tyrosine-protein kinase FLT3) (CD antigen CD135)               | Flt3 (Flk-2) (Flt3)              | 17  | 34  | 7  | 10 |
| P12813 | Nuclear receptor subfamily 4 group A member 1 (Orphan nuclear receptor HMR) (Nuclear hormone receptor NUR/77) (N10 nuclear protein)                                | Nr4a1 (Gfrp) (Hmr) (N10) (Nur77) | 61  | 31  | 7  | 10 |

|        |                                                                                                                                                                                                                                                       |                                |      |      |    |    |
|--------|-------------------------------------------------------------------------------------------------------------------------------------------------------------------------------------------------------------------------------------------------------|--------------------------------|------|------|----|----|
| Q9Z1F9 | SUMO-activating enzyme subunit 2 (EC 6.3.2.-) (Ubiquitin-like 1-activating enzyme E1B) (Anthracycline-associated resistance ARX)                                                                                                                      | Uba2 (Sae2) (Uble1b)           | 62   | 77   | 10 | 14 |
| P68510 | 14-3-3 protein eta                                                                                                                                                                                                                                    | Ywhah                          | 707  | 962  | 58 | 80 |
| P70696 | Histone H2B type 1-A (Histone H2B, testis) (Testis-specific histone H2B)                                                                                                                                                                              | Hist1h2ba (Th2b)               | 146  | 378  | 37 | 51 |
| P05214 | Tubulin alpha-3 chain (Tubulin alpha-3/alpha-7 chain) (Alpha-tubulin 3/7) (Alpha-tubulin isotype M-alpha-3/7)                                                                                                                                         | Tuba3a (Tuba3); Tuba3b (Tuba7) | 1112 | 1288 | 61 | 84 |
| P17047 | Lysosome-associated membrane glycoprotein 2 (LAMP-2) (Lysosomal membrane glycoprotein type B) (LGP-B) (CD107 antigen-like family member B) (CD antigen CD107b)                                                                                        | Lamp2 (Lamp-2)                 | 26   | 29   | 8  | 11 |
| P27641 | ATP-dependent DNA helicase 2 subunit 2 (EC 3.6.1.-) (ATP-dependent DNA helicase II 80 kDa subunit) (Ku autoantigen protein p86 homolog) (Ku80) (CTC box-binding factor 85 kDa subunit) (CTCBF) (CTC85) (Nuclear factor IV) (DNA repair protein XRCC5) | Xrcc5 (G22p2)                  | 22   | 29   | 16 | 22 |
| P70338 | Zinc finger protein Gfi-1 (Growth factor independent protein 1)                                                                                                                                                                                       | Gfi1 (Gfi-1)                   | 45   | 39   | 17 | 23 |
| Q61789 | Laminin subunit alpha-3 (Nicein subunit alpha)                                                                                                                                                                                                        | Lama3                          | 26   | 26   | 37 | 50 |
| Q6P8J2 | Diamine acetyltransferase 2 (EC 2.3.1.57) (Spermidine/spermine N(1)-acetyltransferase 2) (Polyamine N-acetyltransferase 2)                                                                                                                            | Sat2 (Ssat2)                   | 33   | 23   | 6  | 8  |
| Q9EPL8 | Importin-7 (Imp7) (Ran-binding protein 7) (RanBP7)                                                                                                                                                                                                    | Ipo7 (Ranbp7)                  | 25   | 121  | 9  | 12 |



|        |                                                                                                                                                                                                                                                                                        |                        |     |     |    |    |
|--------|----------------------------------------------------------------------------------------------------------------------------------------------------------------------------------------------------------------------------------------------------------------------------------------|------------------------|-----|-----|----|----|
| Q9WTX2 | Interferon-inducible double stranded RNA-dependent protein kinase activator A (Protein kinase, interferon-inducible double stranded RNA-dependent activator) (Protein activator of the interferon-induced protein kinase) (PKR-associated protein X) (PKR-associating protein X) (RAX) | Prkra (Rax)            | 28  | 39  | 9  | 12 |
| Q9ERU9 | E3 SUMO-protein ligase RanBP2 (Ran-binding protein 2)                                                                                                                                                                                                                                  | Ranbp2                 | 56  | 49  | 40 | 53 |
| Q5SXJ3 | Fanconi anemia group J protein homolog (Protein FACJ) (EC 3.6.1.-) (ATP-dependent RNA helicase BRIP1) (BRCA1-interacting protein C-terminal helicase 1) (BRCA1-interacting protein 1) (BRCA1-associated C-terminal helicase 1)                                                         | Brip1 (Bach1) (Fancj)  | 25  | 18  | 13 | 17 |
| P70168 | Importin subunit beta-1 (Karyopherin subunit beta-1) (Nuclear factor P97) (Pore targeting complex 97 kDa subunit) (PTAC97) (SCG)                                                                                                                                                       | Kpnb1 (Impnb)          | 48  | 17  | 13 | 17 |
| Q9Z277 | Bromodomain adjacent to zinc finger domain protein 1B (Williams-Beuren syndrome chromosomal region 9 protein homolog) (WBRS9)                                                                                                                                                          | Baz1b (Wbscr9)         | 43  | 17  | 26 | 34 |
| Q61846 | Maternal embryonic leucine zipper kinase (EC 2.7.11.1) (Protein kinase PK38) (mPK38)                                                                                                                                                                                                   | Melk (Kiaa0175) (Pk38) | 28  | 32  | 10 | 13 |
| P47753 | F-actin-capping protein subunit alpha-1 (CapZ alpha-1)                                                                                                                                                                                                                                 | Capza1 (Cappa1)        | 60  | 33  | 7  | 9  |
| P63163 | Small nuclear ribonucleoprotein-associated protein N (snRNP-N) (Sm protein N) (Sm-N) (SmN) (Sm-D) (Tissue-specific-splicing protein)                                                                                                                                                   | Snrpn (Smn)            | 38  | 17  | 7  | 9  |
| Q7TQ07 | DNA polymerase nu (EC 2.7.7.7)                                                                                                                                                                                                                                                         | Poln                   | 20  | 39  | 14 | 18 |
| Q61753 | D-3-phosphoglycerate dehydrogenase (3-PGDH) (EC 1.1.1.95) (A10)                                                                                                                                                                                                                        | Phgdh                  | 105 | 158 | 14 | 18 |

|        |                                                                                                                                                                          |                                  |     |     |     |     |
|--------|--------------------------------------------------------------------------------------------------------------------------------------------------------------------------|----------------------------------|-----|-----|-----|-----|
| P05064 | Fructose-bisphosphate aldolase A (EC 4.1.2.13) (Muscle-type aldolase) (Aldolase 1)                                                                                       | Aldoa (Aldo1)                    | 211 | 567 | 36  | 46  |
| Q07133 | Histone H1t (Testicular H1 histone)                                                                                                                                      | Hist1h1t (H1ft) (H1t)            | 46  | 72  | 54  | 69  |
| Q923B1 | Lariat debranching enzyme (EC 3.1.-.-)                                                                                                                                   | Dbr1                             | 28  | 29  | 15  | 19  |
| P27661 | Histone H2A.x (H2a/x)                                                                                                                                                    | H2afx (H2a.x) (H2ax) (Hist5-2ax) | 301 | 426 | 15  | 19  |
| Q62093 | Splicing factor, arginine/serine-rich 2 (Splicing factor SC35) (SC-35) (Splicing component, 35 kDa) (Protein PR264) (Putative myelin regulatory factor 1) (MRF-1)        | Sfrs2 (Pr264) (Sfrs10)           | 184 | 117 | 15  | 19  |
| P28271 | Cytoplasmic aconitate hydratase (Aconitase) (EC 4.2.1.3) (Citrate hydro-lyase) (Iron-responsive element-binding protein 1) (IRE-BP 1) (Iron regulatory protein 1) (IRP1) | Aco1 (Ireb1) (Irebp)             | 77  | 122 | 147 | 184 |
| P61028 | Ras-related protein Rab-8B                                                                                                                                               | Rab8b                            | 17  | 59  | 4   | 5   |
| Q60716 | Prolyl 4-hydroxylase subunit alpha-2 (EC 1.14.11.2) (4-PH alpha-2) (Procollagen-proline,2-oxoglutarate-4-dioxygenase subunit alpha-2)                                    | P4ha2                            | 22  | 27  | 8   | 10  |
| P17183 | Gamma-enolase (EC 4.2.1.11) (2-phospho-D-glycerate hydro-lyase) (Neural enolase) (Neuron-specific enolase) (NSE) (Enolase 2)                                             | Eno2 (Eno-2)                     | 228 | 181 | 12  | 15  |
| Q811J3 | Iron-responsive element-binding protein 2 (IRE-BP 2) (Iron regulatory protein 2) (IRP2)                                                                                  | Ireb2 (Irp2)                     | 69  | 119 | 142 | 176 |
| Q61316 | Heat shock 70 kDa protein 4 (Heat shock 70-related protein APG-2)                                                                                                        | Hspa4 (Apg2) (Hsp110)            | 379 | 792 | 42  | 52  |
| Q8BU30 | Isoleucyl-tRNA synthetase, cytoplasmic (EC 6.1.1.5) (Isoleucine--tRNA ligase) (IleRS) (IRS)                                                                              | Iars                             | 85  | 46  | 30  | 37  |

|        |                                                                                                                                                                                                                             |                           |     |     |     |     |
|--------|-----------------------------------------------------------------------------------------------------------------------------------------------------------------------------------------------------------------------------|---------------------------|-----|-----|-----|-----|
| Q8BGD9 | Eukaryotic translation initiation factor 4B (eIF-4B)                                                                                                                                                                        | Eif4b                     | 238 | 306 | 13  | 16  |
| Q61466 | SWI/SNF-related matrix-associated actin-dependent regulator of chromatin subfamily D member 1 (SWI/SNF complex 60 kDa subunit) (60 kDa BRG-1/Brm-associated factor subunit A) (BRG1-associated factor 60A) (D15KZ1 protein) | Smarcd1 (Baf60a) (D15Kz1) | 27  | 29  | 13  | 16  |
| P59270 | Galactosylgalactosylxylosylprotein 3-beta-glucuronosyltransferase 2 (EC 2.4.1.135) (Beta-1,3-glucuronyltransferase 2) (UDP-glucuronosyltransferase-S) (Glucuronosyltransferase-S) (GlcAT-S) (GlcAT-D)                       | B3gat2 (Glcats)           | 29  | 16  | 9   | 11  |
| Q8VII8 | Mineralocorticoid receptor (MR) (Nuclear receptor subfamily 3 group C member 2)                                                                                                                                             | Nr3c2 (Mlr)               | 28  | 22  | 18  | 22  |
| Q9R1P0 | Proteasome subunit alpha type-4 (EC 3.4.25.1) (Proteasome component C9) (Macropain subunit C9) (Multicatalytic endopeptidase complex subunit C9) (Proteasome subunit L)                                                     | PsmA4                     | 29  | 151 | 14  | 17  |
| Q9CZY3 | Ubiquitin-conjugating enzyme E2 variant 1 (UEV-1) (CROC-1)                                                                                                                                                                  | Ube2v1 (Croc1)            | 83  | 163 | 166 | 201 |
| O08648 | Mitogen-activated protein kinase kinase kinase 4 (EC 2.7.11.25) (MAPK/ERK kinase kinase 4) (MEK kinase 4) (MEKK 4)                                                                                                          | Map3k4 (Mekk4)            | 37  | 16  | 19  | 23  |
| P49025 | Citron Rho-interacting kinase (CRIK) (EC 2.7.11.1) (Rho-interacting, serine/threonine-protein kinase 21)                                                                                                                    | Cit                       | 49  | 67  | 67  | 81  |
| P47754 | F-actin-capping protein subunit alpha-2 (CapZ alpha-2)                                                                                                                                                                      | Capza2 (Cappa2)           | 60  | 33  | 5   | 6   |
| Q9EQC4 | Elongation of very long chain fatty acids protein 4                                                                                                                                                                         | Elov14                    | 25  | 18  | 5   | 6   |
| O35618 | Protein Mdm4 (p53-binding protein Mdm4) (Mdm2-like p53-binding protein) (Protein Mdmx) (Double minute 4 protein)                                                                                                            | Mdm4 (Mdmx)               | 17  | 29  | 5   | 6   |

|        |                                                                                                                                                                                         |                            |     |     |     |     |
|--------|-----------------------------------------------------------------------------------------------------------------------------------------------------------------------------------------|----------------------------|-----|-----|-----|-----|
| Q6PDM2 | Splicing factor, arginine/serine-rich 1 (ASF/SF2)                                                                                                                                       | Sfrs1                      | 24  | 91  | 5   | 6   |
| Q60848 | Lymphocyte-specific helicase (EC 3.6.1.-) (Proliferation associated SNF2-like protein)                                                                                                  | Hells (Lsh) (Pasg)         | 37  | 35  | 10  | 12  |
| P54227 | Stathmin (Phosphoprotein p19) (pp19) (Leukemia-associated phosphoprotein p18) (Oncoprotein 18) (Op18) (pp17) (Prosolin) (Metablastin) (Protein Pr22) (Leukemia-associated gene protein) | Stmn1 (Lag) (Lap18) (Pr22) | 121 | 120 | 10  | 12  |
| Q8BFY9 | Transportin-1 (Importin beta-2) (Karyopherin beta-2)                                                                                                                                    | Tnp1 (Kpnb2)               | 54  | 43  | 10  | 12  |
| Q9QUR6 | Prolyl endopeptidase (PE) (EC 3.4.21.26) (Post-proline cleaving enzyme)                                                                                                                 | Prep (Pep)                 | 56  | 20  | 15  | 18  |
| P80315 | T-complex protein 1 subunit delta (TCP-1-delta) (CCT-delta) (A45)                                                                                                                       | Cct4 (Cctd)                | 61  | 59  | 15  | 18  |
| O08908 | Phosphatidylinositol 3-kinase regulatory subunit beta (PI3-kinase p85 subunit beta) (PtdIns-3-kinase p85-beta)                                                                          | Pik3r2                     | 19  | 25  | 20  | 24  |
| O08810 | 116 kDa U5 small nuclear ribonucleoprotein component (U5 snRNP-specific protein, 116 kDa) (U5-116 kDa) (Elongation factor Tu GTP-binding domain-containing protein 2)                   | Eftud2 (Snrp116)           | 80  | 68  | 21  | 25  |
| Q9R0K7 | Plasma membrane calcium-transporting ATPase 2 (PMCA2) (EC 3.6.3.8) (Plasma membrane calcium ATPase isoform 2) (Plasma membrane calcium pump isoform 2)                                  | Atp2b2 (Pmca2)             | 32  | 27  | 70  | 83  |
| P54103 | DnaJ homolog subfamily C member 2 (Zuotin-related factor 1) (Mouse Id associate 1) (MIDA1)                                                                                              | Dnajc2 (Mida1) (Zrf1)      | 23  | 27  | 11  | 13  |
| P80313 | T-complex protein 1 subunit eta (TCP-1-eta) (CCT-eta)                                                                                                                                   | Cct7 (Ccth)                | 49  | 50  | 11  | 13  |
| Q8C3X4 | GTP-binding protein GUF1 homolog                                                                                                                                                        | Guf1                       | 311 | 506 | 412 | 483 |

|        |                                                                                                                                                                                                                                                                                                                    |                                  |     |     |     |     |
|--------|--------------------------------------------------------------------------------------------------------------------------------------------------------------------------------------------------------------------------------------------------------------------------------------------------------------------|----------------------------------|-----|-----|-----|-----|
| Q61171 | Peroxiredoxin-2 (EC 1.11.1.15) (Thioredoxin peroxidase 1) (Thioredoxin-dependent peroxide reductase 1) (Thiol-specific antioxidant protein) (TSA)                                                                                                                                                                  | Prdx2 (Tdpx1) (Tpx)              | 568 | 898 | 47  | 55  |
| Q61122 | NGFI-A-binding protein 1 (EGR-1-binding protein 1)                                                                                                                                                                                                                                                                 | Nab1                             | 30  | 25  | 6   | 7   |
| Q6GSS7 | Histone H2A type 2-A (H2A.2) (H2a-614) (H2a-615)                                                                                                                                                                                                                                                                   | Hist2h2aa1; Hist2h2aa2           | 505 | 763 | 18  | 21  |
| P49718 | DNA replication licensing factor MCM5 (CDC46 homolog) (P1-CDC46)                                                                                                                                                                                                                                                   | Mcm5 (Cdc46) (Mcmd5)             | 40  | 20  | 18  | 21  |
| P48754 | Breast cancer type 1 susceptibility protein homolog                                                                                                                                                                                                                                                                | Brca1                            | 28  | 25  | 26  | 30  |
| Q9JKP5 | Muscleblind-like protein 1 (Triplet-expansion RNA-binding protein)                                                                                                                                                                                                                                                 | Mbnl1 (Exp) (Mbnl)               | 45  | 63  | 244 | 281 |
| Q62418 | Drebrin-like protein (SH3 domain-containing protein 7) (Actin-binding protein 1)                                                                                                                                                                                                                                   | Dbnl (Abp1) (Sh3p7)              | 24  | 39  | 7   | 8   |
| Q9QWY8 | 130 kDa phosphatidylinositol 4,5-biphosphate-dependent ARF1 GTPase-activating protein (PIP2-dependent ARF1 GAP) (ADP-ribosylation factor-directed GTPase-activating protein 1) (ARF GTPase-activating protein 1) (Development and differentiation-enhancing factor 1) (Differentiation-enhancing factor 1) (DEF-1) | Ddef1 (Asap1) (Kiaa1249) (Shag1) | 26  | 23  | 14  | 16  |
| Q6A4J8 | Ubiquitin carboxyl-terminal hydrolase 7 (EC 3.1.2.15) (Ubiquitin thioesterase 7) (Ubiquitin-specific-processing protease 7) (Deubiquitinating enzyme 7) (Herpesvirus-associated ubiquitin-specific protease) (mHAUSP)                                                                                              | Usp7 (Hausp)                     | 27  | 18  | 14  | 16  |
| P58660 | Caspase recruitment domain-containing protein 10 (Bcl10-interacting MAGUK protein 1) (Bimp1)                                                                                                                                                                                                                       | Card10 (Bimp1)                   | 33  | 23  | 15  | 17  |

|        |                                                                                                                                                                                                                     |                                   |      |      |     |     |
|--------|---------------------------------------------------------------------------------------------------------------------------------------------------------------------------------------------------------------------|-----------------------------------|------|------|-----|-----|
| P97820 | Mitogen-activated protein kinase kinase kinase kinase 4 (EC 2.7.11.1) (MAPK/ERK kinase kinase kinase 4) (MEK kinase kinase 4) (MEKKK 4) (HPK/GCK-like kinase HGK) (Nck-interacting kinase)                          | Map4k4 (Nik)                      | 65   | 54   | 15  | 17  |
| P62270 | 40S ribosomal protein S18 (Ke-3) (Ke3)                                                                                                                                                                              | Rps18                             | 210  | 209  | 15  | 17  |
| P55200 | Histone-lysine N-methyltransferase HRX (EC 2.1.1.43) (Zinc finger protein HRX) (ALL-1)                                                                                                                              | Mll (All1) (Hrx) (Mll1)           | 67   | 26   | 39  | 44  |
| P62908 | 40S ribosomal protein S3                                                                                                                                                                                            | Rps3                              | 778  | 762  | 39  | 44  |
| Q921M3 | Splicing factor 3B subunit 3 (Spliceosome-associated protein 130) (SAP 130) (Pre-mRNA splicing factor SF3b 130 kDa subunit) (SF3b130)                                                                               | Sf3b3 (Kiaa0017)                  | 16   | 34   | 24  | 27  |
| Q9WUF3 | CASP8-associated protein 2 (FLICE-associated huge protein)                                                                                                                                                          | Casp8ap2 (Flash)                  | 28   | 16   | 26  | 29  |
| Q64467 | Glyceraldehyde-3-phosphate dehydrogenase, testis-specific (EC 1.2.1.12) (Spermatogenic glyceraldehyde-3-phosphate dehydrogenase) (Spermatogenic cell-specific glyceraldehyde 3-phosphate dehydrogenase 2) (GAPDH-2) | Gapdhs (Gapds) (Gapds)            | 75   | 781  | 26  | 29  |
| P41230 | Histone demethylase JARID1C (EC 1.14.11.-) (Jumonji/ARID domain-containing protein 1C) (Protein SmcX) (Protein Xe169)                                                                                               | Jarid1c (Kiaa0234) (Smcx) (Xe169) | 34   | 32   | 26  | 29  |
| P26618 | Alpha-type platelet-derived growth factor receptor (EC 2.7.10.1) (PDGF-R-alpha) (CD140 antigen-like family member A) (CD antigen CD140a)                                                                            | Pdgfra                            | 37   | 73   | 160 | 178 |
| P19253 | 60S ribosomal protein L13a (Transplantation antigen P198) (Tum-P198 antigen)                                                                                                                                        | Rpl13a (P198) (Tstap198-7)        | 27   | 65   | 9   | 10  |
| P62631 | Elongation factor 1-alpha 2 (EF-1-alpha-2) (Elongation factor 1 A-2) (eEF1A-2) (Statin S1)                                                                                                                          | Eef1a2 (Eef1al) (Stn)             | 1275 | 1549 | 258 | 285 |

|        |                                                                                                                                                                                                    |                         |     |     |    |    |
|--------|----------------------------------------------------------------------------------------------------------------------------------------------------------------------------------------------------|-------------------------|-----|-----|----|----|
| Q62446 | FK506-binding protein 3 (EC 5.2.1.8) (Peptidyl-prolyl cis-trans isomerase) (PPIase) (Rotamase) (25 kDa FKBP) (FKBP-25) (Rapamycin-selective 25 kDa immunophilin)                                   | Fkbp3 (Fkbp25)          | 31  | 31  | 10 | 11 |
| O55234 | Proteasome subunit beta type-5 (EC 3.4.25.1) (Proteasome epsilon chain) (Macropain epsilon chain) (Multicatalytic endopeptidase complex epsilon chain) (Proteasome subunit X) (Proteasome chain 6) | Psmb5                   | 168 | 227 | 10 | 11 |
| Q93092 | Transaldolase (EC 2.2.1.2)                                                                                                                                                                         | Taldo1 (Tal) (Taldo)    | 20  | 93  | 10 | 11 |
| Q9R0Q7 | Prostaglandin E synthase 3 (EC 5.3.99.3) (Cytosolic prostaglandin E2 synthase) (cPGES) (Telomerase-binding protein p23) (Hsp90 co-chaperone) (Progesterone receptor complex p23) (Sid 3177)        | Ptges3 (Sid3177) (Tebp) | 124 | 239 | 10 | 11 |
| Q9D8N0 | Elongation factor 1-gamma (EF-1-gamma) (eEF-1B gamma)                                                                                                                                              | Eef1g                   | 31  | 85  | 11 | 12 |
| Q8VC12 | Probable urocanate hydratase (Urocanase) (EC 4.2.1.49) (Imidazolonepropionate hydrolase)                                                                                                           | Uroc1                   | 33  | 26  | 11 | 12 |
| P49717 | DNA replication licensing factor MCM4 (CDC21 homolog) (P1-CDC21)                                                                                                                                   | Mcm4 (Cdc21) (Mcmd4)    | 29  | 18  | 11 | 12 |
| Q3THS6 | S-adenosylmethionine synthetase isoform type 2 (AdoMet synthetase 2) (EC 2.5.1.6) (Methionine adenosyltransferase 2)                                                                               | Mat2a                   | 26  | 42  | 11 | 12 |
| Q99KK9 | Probable histidyl-tRNA synthetase, mitochondrial (EC 6.1.1.21) (Histidine--tRNA ligase) (HisRS) (Histidine--tRNA ligase-like)                                                                      | Hars2 (Harsl)           | 20  | 41  | 22 | 24 |
| P27546 | Microtubule-associated protein 4 (MAP-4)                                                                                                                                                           | Map4 (Mtap4)            | 94  | 41  | 33 | 36 |

|        |                                                                                                                                                                                                                                       |                                    |      |      |     |     |
|--------|---------------------------------------------------------------------------------------------------------------------------------------------------------------------------------------------------------------------------------------|------------------------------------|------|------|-----|-----|
| P07901 | Heat shock protein HSP 90-alpha (HSP 86) (Tumor-specific transplantation 86 kDa antigen) (TSTA)                                                                                                                                       | Hsp90aa1 (Hsp86) (Hsp86-1) (Hspca) | 1529 | 2324 | 134 | 146 |
| Q6P9Z1 | SWI/SNF-related matrix-associated actin-dependent regulator of chromatin subfamily D member 3 (60 kDa BRG-1/Brm-associated factor subunit C) (BRG1-associated factor 60C) (mBAF60c)                                                   | Smarcd3 (Baf60c)                   | 29   | 19   | 46  | 50  |
| P70298 | Homeobox protein cut-like 2 (Cut-like 2) (Homeobox protein Cux-2)                                                                                                                                                                     | Cux2 (Cutl2)                       | 30   | 22   | 12  | 13  |
| P38647 | Stress-70 protein, mitochondrial (75 kDa glucose-regulated protein) (GRP 75) (Heat shock 70 kDa protein 9) (Peptide-binding protein 74) (PBP74) (P66 MOT) (Mortalin)                                                                  | Hspa9 (Grp75) (Hsp74) (Hspa9a)     | 33   | 33   | 12  | 13  |
| Q8BKC5 | Importin-5 (Imp5) (Importin subunit beta-3) (Karyopherin beta-3) (Ran-binding protein 5) (RanBP5)                                                                                                                                     | Ipo5 (Kpnb3) (Ranbp5)              | 185  | 91   | 12  | 13  |
| P10126 | Elongation factor 1-alpha 1 (EF-1-alpha-1) (Elongation factor 1 A-1) (eEF1A-1) (Elongation factor Tu) (EF-Tu)                                                                                                                         | Eef1a1 (Eef1a)                     | 2004 | 2344 | 305 | 330 |
| P08113 | Endoplasmic reticulum chaperone (Heat shock protein 90 kDa beta member 1) (94 kDa glucose-regulated protein) (GRP94) (ERP99) (Polymorphic tumor rejection antigen 1) (Tumor rejection antigen gp96)                                   | Hsp90b1 (Tra-1) (Tra1)             | 221  | 298  | 25  | 27  |
| Q9Z104 | SWI/SNF-related matrix-associated actin-dependent regulator of chromatin subfamily E member 1-related (SMARCE1-related protein) (HMG box-containing protein 20B) (Structural DNA-binding protein BRAF35) (BRCA2-associated factor 35) | Hmg20b (Braf35) (Hmgx2) (Smarce1r) | 30   | 20   | 14  | 15  |
| P11984 | T-complex protein 1 subunit alpha A (TCP-1-alpha) (CCT-alpha) (Tailless complex polypeptide 1A) (TCP-1-A)                                                                                                                             | Cct1 (Ccta) (Tcp1)                 | 29   | 66   | 14  | 15  |



|        |                                                                                                                                                                                                                                                                                                                                        |                                     |      |      |     |     |
|--------|----------------------------------------------------------------------------------------------------------------------------------------------------------------------------------------------------------------------------------------------------------------------------------------------------------------------------------------|-------------------------------------|------|------|-----|-----|
| Q3TY86 | Apoptosis-inducing factor 3 (EC 1.-.-.-)<br>(Apoptosis-inducing factor-like protein)                                                                                                                                                                                                                                                   | Aifm3 (Aifl)                        | 42   | 26   | 28  | 30  |
| P70398 | Probable ubiquitin carboxyl-terminal hydrolase FAF-X (EC 3.1.2.15) (Ubiquitin thioesterase FAF-X) (Ubiquitin-specific-processing protease FAF-X) (Deubiquitinating enzyme FAF-X) (Fat facets protein-related, X-linked) (Ubiquitin-specific protease 9, X chromosome) (Ubiquitin carboxyl-terminal hydrolase FAM) (Fat facets homolog) | Usp9x (Faf1)<br>(Fam)               | 42   | 28   | 57  | 61  |
| Q8BKX6 | Serine/threonine-protein kinase SMG1 (SMG-1) (EC 2.7.11.1)                                                                                                                                                                                                                                                                             | Smg1<br>(Kiaa0421)                  | 33   | 27   | 30  | 32  |
| P16858 | Glyceraldehyde-3-phosphate dehydrogenase (GAPDH) (EC 1.2.1.12)                                                                                                                                                                                                                                                                         | Gapdh (Gapd)                        | 1514 | 1781 | 84  | 89  |
| Q8VI56 | Low-density lipoprotein receptor-related protein 4 (LDLR dan)                                                                                                                                                                                                                                                                          | Lrp4<br>(Kiaa0816)                  | 77   | 30   | 19  | 20  |
| P16546 | Spectrin alpha chain, brain (Spectrin, non-erythroid alpha chain) (Alpha-II spectrin) (Fodrin alpha chain)                                                                                                                                                                                                                             | Sptan1<br>(Spna2)<br>(Spta2)        | 68   | 86   | 66  | 69  |
| Q920R0 | Alsin (Amyotrophic lateral sclerosis protein 2 homolog)                                                                                                                                                                                                                                                                                | Als2                                | 74   | 88   | 72  | 75  |
| Q62504 | Msx2-interacting protein (SPEN homolog) (SMART/HDAC1-associated repressor protein)                                                                                                                                                                                                                                                     | Spn<br>(Kiaa0929)<br>(Mint) (Sharp) | 27   | 18   | 72  | 75  |
| O35973 | Period circadian protein homolog 1 (Circadian clock protein PERIOD 1) (Circadian pacemaker protein Rigui) (mPER1)                                                                                                                                                                                                                      | Per1 (Per)<br>(Rigui)               | 29   | 21   | 27  | 28  |
| P62281 | 40S ribosomal protein S11                                                                                                                                                                                                                                                                                                              | Rps11                               | 166  | 132  | 27  | 28  |
| Q9JM05 | E3 SUMO-protein ligase PIAS4 (Protein inhibitor of activated STAT protein 4) (Protein inhibitor of activated STAT protein gamma) (PIAS-gamma) (PIASy)                                                                                                                                                                                  | Pias4 (Piasg)                       | 26   | 29   | 162 | 165 |
| O54750 | Cytochrome P450 2J6 (EC 1.14.14.1) (CYPIIJ6) (Arachidonic acid epoxygenase)                                                                                                                                                                                                                                                            | Cyp2j6                              | 29   | 34   | 4   | 4   |

|        |                                                                                                                                                                                                        |                                                |     |     |    |    |
|--------|--------------------------------------------------------------------------------------------------------------------------------------------------------------------------------------------------------|------------------------------------------------|-----|-----|----|----|
| P62141 | Serine/threonine-protein phosphatase PP1-beta catalytic subunit (PP-1B) (EC 3.1.3.16)                                                                                                                  | Ppp1cb                                         | 177 | 57  | 4  | 4  |
| P12367 | cAMP-dependent protein kinase type II-alpha regulatory subunit                                                                                                                                         | Prkar2a                                        | 33  | 23  | 5  | 5  |
| Q3TXZ1 | Zinc finger protein 575                                                                                                                                                                                | Znf575<br>(Zfp575)                             | 30  | 25  | 5  | 5  |
| Q8VCZ3 | THAP domain-containing protein 7                                                                                                                                                                       | Thap7                                          | 26  | 18  | 6  | 6  |
| O88693 | Ceramide glucosyltransferase (EC 2.4.1.80) (Glucosylceramide synthase) (GCS) (UDP-glucose:N-acylsphingosine D-glucosyltransferase) (UDP-glucose ceramide glucosyltransferase) (GLCT-1)                 | Ugcg                                           | 37  | 50  | 7  | 7  |
| Q9R1P1 | Proteasome subunit beta type-3 (EC 3.4.25.1) (Proteasome theta chain) (Proteasome chain 13) (Proteasome component C10-II)                                                                              | Psmb3                                          | 87  | 135 | 7  | 7  |
| Q8VC28 | Aldo-keto reductase family 1 member C13 (EC 1.1.1.-)                                                                                                                                                   | Akr1c13                                        | 32  | 23  | 8  | 8  |
| P30416 | FK506-binding protein 4 (EC 5.2.1.8) (Peptidyl-prolyl cis-trans isomerase) (PPIase) (Rotamase) (HSP-binding immunophilin) (HBI) (FKBP52 protein) (52 kDa FK506-binding protein) (FKBP59) (p59 protein) | Fkbp4                                          | 40  | 62  | 8  | 8  |
| Q9R190 | Metastasis-associated protein MTA2 (Metastasis-associated 1-like 1)                                                                                                                                    | Mta2 (Mta111)                                  | 27  | 26  | 9  | 9  |
| Q6P5F9 | Exportin-1 (Exp1) (Chromosome region maintenance 1 protein homolog)                                                                                                                                    | Xpo1 (Crm1)                                    | 19  | 43  | 9  | 9  |
| Q9DAI4 | Zinc finger and BTB domain-containing protein 43 (Zinc finger protein 297B)                                                                                                                            | Zbtb43<br>(Kiaa0414)<br>(Zfp297b)<br>(Znf297b) | 23  | 51  | 9  | 9  |
| Q9CQ60 | 6-phosphogluconolactonase (6PGL) (EC 3.1.1.31)                                                                                                                                                         | Pgls                                           | 148 | 41  | 11 | 11 |

|        |                                                                                                                                                                          |                                       |    |     |    |    |
|--------|--------------------------------------------------------------------------------------------------------------------------------------------------------------------------|---------------------------------------|----|-----|----|----|
| O09061 | Proteasome subunit beta type-1 (EC 3.4.25.1) (Proteasome component C5) (Macropain subunit C5) (Multicatalytic endopeptidase complex subunit C5) (Proteasome gamma chain) | Psmb1                                 | 84 | 94  | 11 | 11 |
| Q80YV4 | Pantothenate kinase 4 (EC 2.7.1.33) (Pantothenic acid kinase 4) (mPanK4)                                                                                                 | Pank4                                 | 23 | 28  | 13 | 13 |
| Q9DB77 | Cytochrome b-c1 complex subunit 2, mitochondrial (Ubiquinol-cytochrome-c reductase complex core protein 2) (Core protein II) (Complex III subunit 2)                     | Uqcrc2                                | 29 | 20  | 13 | 13 |
| Q9JIF7 | Coatomer subunit beta (Beta-coat protein) (Beta-COP)                                                                                                                     | Copb1 (Copb)                          | 37 | 22  | 15 | 15 |
| P25206 | DNA replication licensing factor MCM3 (DNA polymerase alpha holoenzyme-associated protein P1) (P1-MCM3)                                                                  | Mcm3 (Mcmd) (Mcmd3)                   | 74 | 185 | 15 | 15 |
| Q01098 | Glutamate [NMDA] receptor subunit epsilon-3 (N-methyl D-aspartate receptor subtype 2C) (NMDAR2C) (NR2C)                                                                  | Grin2c                                | 18 | 33  | 15 | 15 |
| Q8R4K2 | Interleukin-1 receptor-associated kinase 4 (IRAK-4) (EC 2.7.11.1)                                                                                                        | Irak4                                 | 32 | 47  | 22 | 22 |
| P30681 | High mobility group protein B2 (High mobility group protein 2) (HMG-2)                                                                                                   | Hmgb2 (Hmg2)                          | 94 | 222 | 24 | 24 |
| Q80UK8 | Integrator complex subunit 2 (Int2)                                                                                                                                      | Ints2 (Kiaa1287)                      | 16 | 27  | 24 | 24 |
| Q6P8J7 | Creatine kinase, sarcomeric mitochondrial (EC 2.7.3.2) (S-MtCK)                                                                                                          | Ckmt2                                 | 50 | 66  | 26 | 26 |
| Q62261 | Spectrin beta chain, brain 1 (Spectrin, non-erythroid beta chain 1) (Beta-II spectrin) (Fodrin beta chain) (Embryonic liver fodrin)                                      | Sptbn1 (Elf) (Spnb-2) (Spnb2) (Sptb2) | 56 | 54  | 48 | 48 |
| Q8K4E0 | Alstrom syndrome protein 1 homolog                                                                                                                                       | Alms1 (Kiaa0328)                      | 29 | 30  | 86 | 86 |

|        |                                                                                                                                                                                                              |                                        |      |      |     |     |
|--------|--------------------------------------------------------------------------------------------------------------------------------------------------------------------------------------------------------------|----------------------------------------|------|------|-----|-----|
| P11499 | Heat shock protein HSP 90-beta (HSP 84) (Tumor-specific transplantation 84 kDa antigen) (TSTA)                                                                                                               | Hsp90ab1 (Hsp84) (Hsp84-1) (Hspcb)     | 2943 | 3523 | 208 | 205 |
| P58252 | Elongation factor 2 (EF-2)                                                                                                                                                                                   | Eef2                                   | 1630 | 1718 | 128 | 126 |
| Q91YE5 | Bromodomain adjacent to zinc finger domain protein 2A (Transcription termination factor I-interacting protein 5) (TTF-I-interacting protein 5) (Tip5)                                                        | Baz2a (Tip5)                           | 36   | 15   | 56  | 55  |
| P23116 | Eukaryotic translation initiation factor 3 subunit A (eIF3a) (Eukaryotic translation initiation factor 3 subunit 10) (eIF-3-theta) (eIF3 p167) (eIF3 p180) (eIF3 p185) (p162) (Centrosomin)                  | Eif3a (Csma) (Eif3) (Eif3s10)          | 199  | 166  | 58  | 56  |
| O08638 | Myosin-11 (Myosin heavy chain 11) (Myosin heavy chain, smooth muscle isoform) (SMMHC)                                                                                                                        | Myh11                                  | 211  | 221  | 79  | 76  |
| Q8R4B8 | NACHT, LRR and PYD domains-containing protein 3 (Cold autoinflammatory syndrome 1 protein homolog) (Cryopyrin) (PYRIN-containing APAF1-like protein 1) (Mast cell maturation-associated-inducible protein 1) | Nlrp3 (Cias1) (Mmig1) (Nalp3) (Pypaf1) | 30   | 20   | 24  | 23  |
| P16406 | Glutamyl aminopeptidase (EC 3.4.11.7) (EAP) (Aminopeptidase A) (APA) (BP-1/6C3 antigen) (CD antigen CD249)                                                                                                   | Enpep                                  | 98   | 90   | 48  | 46  |
| Q8BGQ7 | Alanyl-tRNA synthetase, cytoplasmic (EC 6.1.1.7) (Alanine--tRNA ligase) (AlaRS)                                                                                                                              | Aars                                   | 179  | 216  | 23  | 22  |
| Q91V92 | ATP-citrate synthase (EC 2.3.3.8) (ATP-citrate (pro-S-)-lyase) (Citrate cleavage enzyme)                                                                                                                     | Acly                                   | 349  | 488  | 45  | 43  |
| Q8R1B4 | Eukaryotic translation initiation factor 3 subunit C (eIF3c) (Eukaryotic translation initiation factor 3 subunit 8) (eIF3 p110)                                                                              | Eif3c (Eif3s8)                         | 34   | 63   | 22  | 21  |

|        |                                                                                                                                                                                             |                                   |     |     |    |    |
|--------|---------------------------------------------------------------------------------------------------------------------------------------------------------------------------------------------|-----------------------------------|-----|-----|----|----|
| Q6ZPK0 | PHD finger protein 21A (BRAF35-HDAC complex protein BHC80) (mBHC80) (BHC80a)                                                                                                                | Phf21a (Bhc80) (Kiaa1696) (Pfff1) | 28  | 37  | 20 | 19 |
| P54869 | Hydroxymethylglutaryl-CoA synthase, mitochondrial (HMG-CoA synthase) (EC 2.3.3.10) (3-hydroxy-3-methylglutaryl coenzyme A synthase)                                                         | Hmgcs2                            | 26  | 23  | 18 | 17 |
| P03966 | N-myc proto-oncogene protein                                                                                                                                                                | Mycn (Nmyc) (Nmyc1)               | 65  | 46  | 18 | 17 |
| Q8BTI8 | Serine/arginine repetitive matrix protein 2                                                                                                                                                 | Srrm2 (Kiaa0324)                  | 78  | 70  | 92 | 86 |
| Q9CPR4 | 60S ribosomal protein L17                                                                                                                                                                   | Rpl17                             | 187 | 135 | 15 | 14 |
| Q7TMY8 | E3 ubiquitin-protein ligase HUWE1 (EC 6.3.2.-) (HECT, UBA and WWE domain-containing protein 1) (Upstream regulatory element-binding protein 1) (URE-binding protein 1) (URE-B1) (E3Histone) | Huwe1 (Kiaa0312) (Ureb1)          | 33  | 91  | 39 | 36 |
| P35969 | Vascular endothelial growth factor receptor 1 (VEGFR-1) (EC 2.7.10.1) (Tyrosine-protein kinase receptor FLT) (FLT-1) (Embryonic receptor kinase 2)                                          | Flt1 (Emrk2) (Flt)                | 29  | 36  | 35 | 32 |
| Q01853 | Transitional endoplasmic reticulum ATPase (TER ATPase) (15S Mg(2+)-ATPase p97 subunit) (Valosin-containing protein) (VCP)                                                                   | Vcp                               | 691 | 699 | 56 | 51 |
| Q9WTR0 | Matrix metalloproteinase-16 (MMP-16) (EC 3.4.24.-) (Membrane-type matrix metalloproteinase 3) (MT-MMP 3) (MTMMP3) (Membrane-type-3 matrix metalloproteinase) (MT3-MMP) (MT3MMP)             | Mmp16                             | 17  | 36  | 11 | 10 |
| Q8CGC7 | Bifunctional aminoacyl-tRNA synthetase [Includes: Glutamyl-tRNA synthetase (EC 6.1.1.17) (Glutamate--tRNA ligase); Prolyl-tRNA synthetase (EC 6.1.1.15) (Proline--tRNA ligase)]             | Eprs (Qprs)                       | 130 | 102 | 32 | 29 |

|        |                                                                                                                                                                                                                     |                                    |     |      |     |     |
|--------|---------------------------------------------------------------------------------------------------------------------------------------------------------------------------------------------------------------------|------------------------------------|-----|------|-----|-----|
| Q8VDD5 | Myosin-9 (Myosin heavy chain 9) (Myosin heavy chain, non-muscle IIa) (Non-muscle myosin heavy chain IIa) (NMMHC II-a) (NMMHC-IIA) (Cellular myosin heavy chain, type A) (Non-muscle myosin heavy chain-A) (NMMHC-A) | Myh9                               | 780 | 839  | 127 | 115 |
| P07310 | Creatine kinase M-type (EC 2.7.3.2) (Creatine kinase M chain) (M-CK)                                                                                                                                                | Ckm (Ckmm)                         | 73  | 107  | 31  | 28  |
| Q9QZH3 | Peptidyl-prolyl cis-trans isomerase E (PPIase E) (Rotamase E) (EC 5.2.1.8) (Cyclophilin E) (Cyclophilin-33)                                                                                                         | Ppie (Cyp33)                       | 28  | 35   | 10  | 9   |
| Q925Q8 | Dachshund homolog 2 (Dach2)                                                                                                                                                                                         | Dach2                              | 22  | 30   | 9   | 8   |
| P43277 | Histone H1.3 (H1 VAR.4) (H1d)                                                                                                                                                                                       | Hist1h1d (H1f3)                    | 78  | 99   | 18  | 16  |
| Q68FD5 | Clathrin heavy chain 1                                                                                                                                                                                              | Cltc                               | 944 | 884  | 88  | 78  |
| Q99104 | Myosin-Va (Dilute myosin heavy chain, non-muscle)                                                                                                                                                                   | Myo5a (Dilute)                     | 28  | 34   | 35  | 31  |
| Q9DBJ1 | Phosphoglycerate mutase 1 (EC 5.4.2.1) (EC 5.4.2.4) (EC 3.1.3.13) (Phosphoglycerate mutase isozyme B) (PGAM-B) (BPG-dependent PGAM 1)                                                                               | Pgam1                              | 612 | 746  | 35  | 31  |
| Q8BG95 | Protein phosphatase 1 regulatory subunit 12B (Myosin phosphatase-targeting subunit 2)                                                                                                                               | Ppp1r12b (Mypt2)                   | 25  | 24   | 25  | 22  |
| Q9R0P5 | Destrin (Actin-depolymerizing factor) (ADF) (Sid 23)                                                                                                                                                                | Dstn (Dsn) (Sid23)                 | 61  | 81   | 8   | 7   |
| P70195 | Proteasome subunit beta type-7 (EC 3.4.25.1) (Proteasome subunit Z) (Macropain chain Z) (Multicatalytic endopeptidase complex chain Z)                                                                              | Psmb7 (Mmc14)                      | 39  | 40   | 8   | 7   |
| Q02053 | Ubiquitin-like modifier-activating enzyme 1 (Ubiquitin-activating enzyme E1) (Ubiquitin-like modifier-activating enzyme 1 X) (Ubiquitin-activating enzyme E1 X)                                                     | Uba1 (Sbx) (Ube1) (Ube1ax) (Ube1x) | 660 | 1086 | 63  | 55  |

|        |                                                                                                                                      |                           |     |     |    |    |
|--------|--------------------------------------------------------------------------------------------------------------------------------------|---------------------------|-----|-----|----|----|
| Q8VHE6 | Dynein heavy chain 5, axonemal (Axonemal beta dynein heavy chain 5) (Mdnah5) (Ciliary dynein heavy chain 5)                          | Dnah5 (Dnahc5)            | 47  | 44  | 83 | 72 |
| Q924C1 | Exportin-5 (Exp5) (Ran-binding protein 21)                                                                                           | Xpo5 (Kiaa1291) (Ranbp21) | 20  | 62  | 15 | 13 |
| P21550 | Beta-enolase (EC 4.2.1.11) (2-phospho-D-glycerate hydro-lyase) (Muscle-specific enolase) (MSE) (Skeletal muscle enolase) (Enolase 3) | Eno3 (Eno-3)              | 313 | 146 | 30 | 26 |
| Q11011 | Puromycin-sensitive aminopeptidase (PSA) (EC 3.4.11.-)                                                                               | Npepps (Psa)              | 71  | 141 | 30 | 26 |
| Q9Z1Q9 | Valyl-tRNA synthetase (EC 6.1.1.9) (Valine--tRNA ligase) (ValRS) (Protein G7a)                                                       | Vars (Bat6) (G7a) (Vars2) | 380 | 302 | 37 | 32 |
| Q9JJK8 | Serine/threonine-protein kinase ATR (EC 2.7.11.1) (Ataxia telangiectasia and Rad3-related protein)                                   | Atr                       | 20  | 25  | 72 | 62 |
| O54749 | Cytochrome P450 2J5 (EC 1.14.14.1) (CYP11J5) (Arachidonic acid epoxygenase)                                                          | Cyp2j5                    | 29  | 34  | 7  | 6  |
| Q9D868 | Peptidyl-prolyl cis-trans isomerase H (PPIase H) (Rotamase H) (EC 5.2.1.8)                                                           | Ppih                      | 55  | 31  | 7  | 6  |
| P67984 | 60S ribosomal protein L22 (Heparin-binding protein HBp15)                                                                            | Rpl22                     | 59  | 48  | 7  | 6  |
| O88866 | Hormonally up-regulated neu tumor-associated kinase (EC 2.7.11.1) (Serine/threonine-protein kinase MAK-V)                            | Hunk (Makv)               | 27  | 21  | 14 | 12 |
| P35979 | 60S ribosomal protein L12                                                                                                            | Rpl12                     | 208 | 389 | 14 | 12 |
| P97784 | Cryptochrome-1                                                                                                                       | Cry1                      | 52  | 42  | 21 | 18 |
| Q9R194 | Cryptochrome-2                                                                                                                       | Cry2 (Kiaa0658)           | 52  | 42  | 21 | 18 |
| Q9CZM2 | 60S ribosomal protein L15                                                                                                            | Rpl15                     | 225 | 107 | 21 | 18 |

|        |                                                                                                                                                                                                                                                      |                              |     |     |    |    |
|--------|------------------------------------------------------------------------------------------------------------------------------------------------------------------------------------------------------------------------------------------------------|------------------------------|-----|-----|----|----|
| P11881 | Inositol 1,4,5-trisphosphate receptor type 1 (Type 1 inositol 1,4,5-trisphosphate receptor) (Type 1 InsP3 receptor) (IP3 receptor isoform 1) (InsP3R1) (Inositol 1,4,5-trisphosphate-binding protein P400) (Purkinje cell protein 1) (Protein PCD-6) | Itpr1 (Insp3r) (Pcd6) (Pcp1) | 37  | 42  | 48 | 41 |
| Q6ZWN5 | 40S ribosomal protein S9                                                                                                                                                                                                                             | Rps9                         | 459 | 248 | 47 | 40 |
| Q9JM52 | Misshapen-like kinase 1 (EC 2.7.11.1) (Mitogen-activated protein kinase kinase kinase 6) (MAPK/ERK kinase kinase 6) (MEK kinase kinase 6) (MEKKK 6) (Misshapen/NIK-related kinase) (GCK family kinase MiNK)                                          | Mink1 (Map4k6) (Mink)        | 18  | 54  | 13 | 11 |
| Q9CQN1 | Heat shock protein 75 kDa, mitochondrial (HSP 75) (Tumor necrosis factor type 1 receptor-associated protein) (TRAP-1) (TNFR-associated protein 1)                                                                                                    | Trap1 (Hsp75)                | 197 | 335 | 13 | 11 |
| P14131 | 40S ribosomal protein S16                                                                                                                                                                                                                            | Rps16                        | 160 | 126 | 19 | 16 |
| P20029 | 78 kDa glucose-regulated protein (GRP 78) (Heat shock 70 kDa protein 5) (Immunoglobulin heavy chain-binding protein) (BiP)                                                                                                                           | Hspa5 (Grp78)                | 262 | 312 | 25 | 21 |
| P46664 | Adenylosuccinate synthetase isozyme 2 (AMPSase 2) (AdSS 2) (EC 6.3.4.4) (Adenylosuccinate synthetase, non-muscle isozyme) (Adenylosuccinate synthetase, acidic isozyme) (IMP--aspartate ligase 2)                                                    | Adss (Adss2)                 | 36  | 66  | 12 | 10 |
| Q99PP7 | E3 ubiquitin-protein ligase TRIM33 (EC 6.3.2.-) (Tripartite motif-containing protein 33) (Transcription intermediary factor 1-gamma) (TIF1-gamma) (Ectodermin homolog)                                                                               | Trim33 (Kiaa1113)            | 33  | 25  | 12 | 10 |



|        |                                                                                                                                                                                                                                                                                                                                                                                                                                                                         |                             |      |      |     |     |
|--------|-------------------------------------------------------------------------------------------------------------------------------------------------------------------------------------------------------------------------------------------------------------------------------------------------------------------------------------------------------------------------------------------------------------------------------------------------------------------------|-----------------------------|------|------|-----|-----|
| Q05816 | Fatty acid-binding protein, epidermal (E-FABP) (Fatty acid-binding protein 5) (Psoriasis-associated fatty acid-binding protein homolog) (PA-FABP) (Keratinocyte lipid-binding protein)                                                                                                                                                                                                                                                                                  | Fabp5 (Fabpe) (Klbp) (Mal1) | 331  | 206  | 18  | 15  |
| P11983 | T-complex protein 1 subunit alpha B (TCP-1-alpha) (CCT-alpha) (Tailless complex polypeptide 1B) (TCP-1-B)                                                                                                                                                                                                                                                                                                                                                               | Cct1 (Ccta) (Tcp1)          | 29   | 66   | 18  | 15  |
| Q64514 | Tripeptidyl-peptidase 2 (EC 3.4.14.10) (Tripeptidyl-peptidase II) (TPP-II) (Tripeptidyl aminopeptidase)                                                                                                                                                                                                                                                                                                                                                                 | Tpp2                        | 54   | 76   | 24  | 20  |
| P20357 | Microtubule-associated protein 2 (MAP-2)                                                                                                                                                                                                                                                                                                                                                                                                                                | Map2 (Mtap2)                | 50   | 22   | 30  | 25  |
| P11531 | Dystrophin                                                                                                                                                                                                                                                                                                                                                                                                                                                              | Dmd                         | 25   | 16   | 66  | 55  |
| Q91XQ0 | Dynein heavy chain 8, axonemal (Axonemal beta dynein heavy chain 8) (Ciliary dynein heavy chain 8)                                                                                                                                                                                                                                                                                                                                                                      | Dnahc8                      | 47   | 51   | 77  | 64  |
| P19096 | Fatty acid synthase (EC 2.3.1.85) [Includes: [Acyl-carrier-protein] S-acetyltransferase (EC 2.3.1.38); [Acyl-carrier-protein] S-malonyltransferase (EC 2.3.1.39); 3-oxoacyl-[acyl-carrier-protein] synthase (EC 2.3.1.41); 3-oxoacyl-[acyl-carrier-protein] reductase (EC 1.1.1.100); 3-hydroxypalmitoyl-[acyl-carrier-protein] dehydratase (EC 4.2.1.61); Enoyl-[acyl-carrier-protein] reductase (EC 1.3.1.10); Oleoyl [acyl-carrier-protein] hydrolase (EC 3.1.2.14)] | Fasn                        | 1869 | 1524 | 163 | 135 |
| Q8R429 | Sarcoplasmic/endoplasmic reticulum calcium ATPase 1 (SERCA1) (EC 3.6.3.8) (Calcium pump 1) (Calcium-transporting ATPase sarcoplasmic reticulum type, fast twitch skeletal muscle isoform) (SR Ca(2+)-ATPase 1) (Endoplasmic reticulum class 1/2 Ca(2+) ATPase)                                                                                                                                                                                                          | Atp2a1                      | 25   | 17   | 17  | 14  |

|        |                                                                                                                                                                                        |                               |     |     |    |    |
|--------|----------------------------------------------------------------------------------------------------------------------------------------------------------------------------------------|-------------------------------|-----|-----|----|----|
| P80316 | T-complex protein 1 subunit epsilon (TCP-1-epsilon) (CCT-epsilon)                                                                                                                      | Cct5 (Ccte) (Kiaa0098)        | 239 | 102 | 17 | 14 |
| Q6DFV7 | Nuclear receptor coactivator 7                                                                                                                                                         | Ncoa7                         | 25  | 16  | 11 | 9  |
| P14206 | 40S ribosomal protein SA (Laminin receptor 1) (p40) (34/67 kDa laminin receptor) (37 kDa oncofetal antigen) (OFA/iLRP)                                                                 | Rpsa (Lamr1) (P40-8)          | 131 | 112 | 11 | 9  |
| Q6ZQ38 | Cullin-associated NEDD8-dissociated protein 1 (Cullin-associated and neddylation-dissociated protein 1) (p120 CAND1)                                                                   | Cand1 (D10Ert516e) (Kiaa0829) | 221 | 246 | 33 | 27 |
| P42227 | Signal transducer and activator of transcription 3 (Acute-phase response factor)                                                                                                       | Stat3 (Aprf)                  | 16  | 28  | 33 | 27 |
| Q569Z5 | Probable ATP-dependent RNA helicase DDX46 (EC 3.6.1.-) (DEAD box protein 46)                                                                                                           | Ddx46 (Kiaa0801)              | 25  | 17  | 21 | 17 |
| Q80ZW0 | Serine/threonine-protein kinase 35 (EC 2.7.11.1)                                                                                                                                       | Stk35                         | 14  | 50  | 21 | 17 |
| Q64512 | Tyrosine-protein phosphatase non-receptor type 13 (EC 3.1.3.48) (Protein tyrosine phosphatase PTP-BL) (Protein-tyrosine phosphatase RIP) (Protein tyrosine phosphatase DPZPTP) (PTP36) | Ptpn13 (Ptp14)                | 28  | 27  | 26 | 21 |
| Q62407 | Striated muscle-specific serine/threonine protein kinase (EC 2.7.11.1) (Aortic preferentially expressed protein 1) (APEG-1)                                                            | Speg (Apeg1) (Kiaa1297)       | 26  | 20  | 31 | 25 |
| P17182 | Alpha-enolase (EC 4.2.1.11) (2-phospho-D-glycerate hydro-lyase) (Non-neural enolase) (NNE) (Enolase 1)                                                                                 | Eno1 (Eno-1)                  | 976 | 802 | 62 | 50 |
| Q924C6 | Lysyl oxidase homolog 4 (EC 1.4.3.-) (Lysyl oxidase-like protein 4) (Lysyl oxidase-related protein C)                                                                                  | Loxl4 (Loxc)                  | 15  | 28  | 5  | 4  |
| Q5XJY5 | Coatomer subunit delta (Delta-coat protein) (Delta-COP) (Archain)                                                                                                                      | Arcn1 (Copd)                  | 61  | 45  | 10 | 8  |

|        |                                                                                                                                                 |                                        |     |     |     |     |
|--------|-------------------------------------------------------------------------------------------------------------------------------------------------|----------------------------------------|-----|-----|-----|-----|
| P54923 | [Protein ADP-ribosylarginine] hydrolase (ADP-ribosylarginine hydrolase) (EC 3.2.2.19) (ADP-ribose-L-arginine cleaving enzyme)                   | Adprh (Arh1)                           | 20  | 41  | 15  | 12  |
| P00342 | L-lactate dehydrogenase C chain (LDH-C) (EC 1.1.1.27) (LDH testis subunit) (LDH-X)                                                              | Ldhc (Ldh-3) (Ldh3)                    | 97  | 122 | 15  | 12  |
| Q9Z2U0 | Proteasome subunit alpha type-7 (EC 3.4.25.1) (Proteasome subunit RC6-1)                                                                        | Psm7                                   | 121 | 253 | 15  | 12  |
| P12970 | 60S ribosomal protein L7a (Surfeit locus protein 3)                                                                                             | Rpl7a (Surf-3) (Surf3)                 | 111 | 31  | 15  | 12  |
| Q99MD9 | Nuclear autoantigenic sperm protein (NASP)                                                                                                      | Nasp                                   | 365 | 293 | 34  | 27  |
| Q8BP67 | 60S ribosomal protein L24                                                                                                                       | Rpl24                                  | 354 | 214 | 24  | 19  |
| Q8C196 | Carbamoyl-phosphate synthase [ammonia], mitochondrial (EC 6.3.4.16) (Carbamoyl-phosphate synthetase I) (CPSase I)                               | Cps1                                   | 22  | 25  | 19  | 15  |
| Q80Z16 | E3 ubiquitin-protein ligase LRSAM1 (EC 6.3.2.-) (Leucine-rich repeat and sterile alpha motif-containing protein 1) (Tsg101-associated ligase)   | Lrsam1                                 | 19  | 35  | 19  | 15  |
| Q80UN9 | tRNA isopentenyltransferase, mitochondrial (IPTase) (EC 2.5.1.8) (Isopentenyl-diphosphate:tRNA isopentenyltransferase) (IPP transferase) (IPPT) | Trit1 (lpt)                            | 31  | 24  | 19  | 15  |
| P62754 | 40S ribosomal protein S6 (Phosphoprotein NP33)                                                                                                  | Rps6                                   | 127 | 283 | 19  | 15  |
| Q9QWL7 | Keratin, type I cytoskeletal 17 (Cytokeratin-17) (CK-17) (Keratin-17) (K17)                                                                     | Krt17 (Krt1-17)                        | 38  | 46  | 14  | 11  |
| Q9JHU4 | Cytoplasmic dynein 1 heavy chain 1 (Cytoplasmic dynein heavy chain 1) (Dynein heavy chain, cytosolic)                                           | Dync1h1 (Dhc1) (Dnch1) (Dnchc1) (Dyhc) | 822 | 395 | 157 | 123 |
| Q6A078 | Centrosomal protein of 290 kDa (Cep290) (Nephrocystin-6)                                                                                        | Cep290 (Kiaa0373) (Nphp6)              | 32  | 57  | 85  | 66  |

|        |                                                                                                                                                                                                                                        |                               |      |     |    |    |
|--------|----------------------------------------------------------------------------------------------------------------------------------------------------------------------------------------------------------------------------------------|-------------------------------|------|-----|----|----|
| P31254 | Ubiquitin-like modifier-activating enzyme 1 Y (Ubiquitin-activating enzyme E1 Y) (Ubiquitin-activating enzyme E1)                                                                                                                      | Ube1ay (Sby) (Ube1y) (Ube1y1) | 161  | 77  | 22 | 17 |
| P06151 | L-lactate dehydrogenase A chain (LDH-A) (EC 1.1.1.27) (LDH muscle subunit) (LDH-M)                                                                                                                                                     | Ldha (Ldh-1) (Ldh1)           | 1033 | 421 | 74 | 57 |
| Q9CZW4 | Long-chain-fatty-acid--CoA ligase 3 (EC 6.2.1.3) (Long-chain acyl-CoA synthetase 3) (LACS 3)                                                                                                                                           | Acs13 (Acs3) (Fac13)          | 41   | 37  | 13 | 10 |
| P05063 | Fructose-bisphosphate aldolase C (EC 4.1.2.13) (Brain-type aldolase) (Aldolase 3) (Zebrin II) (Scrapie-responsive protein 2)                                                                                                           | Aldoc (Aldo3) (Scrg2)         | 35   | 51  | 13 | 10 |
| Q8CGK3 | Lon protease homolog, mitochondrial (EC 3.4.21.-) (Lon protease-like protein) (LONP) (Mitochondrial ATP-dependent protease Lon) (Serine protease 15)                                                                                   | Lonp1 (Prss15)                | 21   | 30  | 43 | 33 |
| P62702 | 40S ribosomal protein S4, X isoform                                                                                                                                                                                                    | Rps4x (Rps4)                  | 402  | 304 | 30 | 23 |
| Q8JZQ2 | AFG3-like protein 2 (EC 3.4.24.-)                                                                                                                                                                                                      | Afg3l2                        | 15   | 27  | 17 | 13 |
| P47856 | Glucosamine--fructose-6-phosphate aminotransferase [isomerizing] 1 (EC 2.6.1.16) (Glutamine:fructose 6 phosphate amidotransferase 1) (GFAT 1) (GFAT1) (D-fructose-6-phosphate amidotransferase 1) (Hexosephosphate aminotransferase 1) | Gfpt1 (Gfpt)                  | 17   | 29  | 17 | 13 |
| Q569Z6 | Thyroid hormone receptor-associated protein 3 (Thyroid hormone receptor-associated protein complex 150 kDa component) (Trap150)                                                                                                        | Thrap3 (Trap150)              | 29   | 48  | 21 | 16 |
| Q99MY8 | Probable histone-lysine N-methyltransferase ASH1L (EC 2.1.1.43) (Absent small and homeotic disks protein 1 homolog) (ASH1-like protein)                                                                                                | Ash1l                         | 19   | 31  | 46 | 35 |
| P70670 | Nascent polypeptide-associated complex subunit alpha, muscle-specific form (Alpha-NAC, muscle-specific form)                                                                                                                           | Naca (Gm1878)                 | 22   | 130 | 29 | 22 |

|        |                                                                                                                                                                                                                            |                                       |     |     |    |    |
|--------|----------------------------------------------------------------------------------------------------------------------------------------------------------------------------------------------------------------------------|---------------------------------------|-----|-----|----|----|
| P16627 | Heat shock 70 kDa protein 1L (Heat shock 70 kDa protein 1-like) (Heat shock 70 kDa-like protein 1) (Spermatid-specific heat shock protein 70)                                                                              | Hspa1l (Hsc70t)                       | 319 | 238 | 33 | 25 |
| O70228 | Probable phospholipid-transporting ATPase IIA (EC 3.6.3.1) (ATPase class II type 9A)                                                                                                                                       | Atp9a                                 | 31  | 29  | 37 | 28 |
| P56480 | ATP synthase subunit beta, mitochondrial (EC 3.6.3.14)                                                                                                                                                                     | Atp5b                                 | 31  | 50  | 8  | 6  |
| Q02956 | Protein kinase C zeta type (EC 2.7.11.13) (nPKC-zeta)                                                                                                                                                                      | Prkcz (PkcZ)                          | 29  | 15  | 8  | 6  |
| Q9DBP5 | UMP-CMP kinase (EC 2.7.4.14) (Cytidylate kinase) (Deoxycytidylate kinase) (Cytidine monophosphate kinase) (Uridine monophosphate kinase) (Uridine monophosphate/cytidine monophosphate kinase) (UMP/CMP kinase) (UMP/CMPK) | Cmpk1 (Cmk) (Cmpk) (Uck) (Umk) (Umpk) | 107 | 93  | 12 | 9  |
| P25233 | Necdin                                                                                                                                                                                                                     | Ndn                                   | 30  | 23  | 16 | 12 |
| P62751 | 60S ribosomal protein L23a                                                                                                                                                                                                 | Rpl23a                                | 75  | 49  | 16 | 12 |
| Q8K1F9 | Lactase-like protein (Klotho/lactase-phlorizin hydrolase-related protein)                                                                                                                                                  | Lctl (Klph)                           | 27  | 21  | 24 | 18 |
| Q8K045 | Serine/threonine-protein kinase N3 (EC 2.7.11.13) (Protein kinase PKN-beta) (Protein-kinase C-related kinase 3)                                                                                                            | Pkn3 (Pknbeta)                        | 130 | 126 | 36 | 27 |
| Q6P3Y5 | Zinc finger protein 280C (Suppressor of hairy wing homolog 3)                                                                                                                                                              | Znf280c (Kiaa1584) (Suhw3) (Zfp280c)  | 87  | 142 | 43 | 32 |
| P58681 | Toll-like receptor 7                                                                                                                                                                                                       | Tlr7                                  | 27  | 33  | 23 | 17 |
| P62264 | 40S ribosomal protein S14                                                                                                                                                                                                  | Rps14                                 | 163 | 166 | 15 | 11 |
| P25444 | 40S ribosomal protein S2 (S4) (LLRep3 protein)                                                                                                                                                                             | Rps2 (Llrep3) (Rps4)                  | 217 | 50  | 26 | 19 |
| Q61656 | Probable ATP-dependent RNA helicase DDX5 (EC 3.6.1.-) (DEAD box protein 5) (RNA helicase p68) (DEAD box RNA helicase DEAD1) (mDEAD1)                                                                                       | Ddx5 (Tnz2)                           | 90  | 43  | 11 | 8  |

|        |                                                                                                                               |                                                                  |     |     |    |    |
|--------|-------------------------------------------------------------------------------------------------------------------------------|------------------------------------------------------------------|-----|-----|----|----|
| P62991 | Ubiquitin                                                                                                                     | Rps27a<br>(Uba80)<br>(Ubcep1);<br>Uba52<br>(Ubcep2);<br>Ubb; Ubc | 61  | 54  | 11 | 8  |
| Q61696 | Heat shock 70 kDa protein 1A (Heat shock 70 kDa protein 3) (HSP70.3) (Hsp68)                                                  | Hspa1a<br>(Hsp70-3)<br>(Hsp70A1)                                 | 266 | 236 | 33 | 24 |
| Q9CR57 | 60S ribosomal protein L14                                                                                                     | Rpl14                                                            | 508 | 391 | 33 | 24 |
| Q61699 | Heat shock protein 105 kDa (Heat shock-related 100 kDa protein E7I) (HSP-E7I) (Heat shock 110 kDa protein) (42 degrees C-HSP) | Hsph1<br>(Hsp105)<br>(Hsp110)<br>(Kiaa0201)                      | 46  | 48  | 18 | 13 |
| P27659 | 60S ribosomal protein L3 (J1 protein)                                                                                         | Rpl3                                                             | 192 | 75  | 25 | 18 |
| Q64237 | Dopamine beta-hydroxylase (EC 1.14.17.1) (Dopamine beta-monooxygenase) [Cleaved into: Soluble dopamine beta-hydroxylase]      | Dbh                                                              | 44  | 23  | 7  | 5  |
| Q9CQ65 | S-methyl-5'-thioadenosine phosphorylase (EC 2.4.2.28) (5'-methylthioadenosine phosphorylase) (MTA phosphorylase) (MTAPase)    | Mtap                                                             | 48  | 36  | 7  | 5  |
| Q99LG2 | Transportin-2 (Karyopherin beta-2b)                                                                                           | Tnpo2                                                            | 42  | 32  | 7  | 5  |
| Q60673 | Receptor-type tyrosine-protein phosphatase-like N (R-PTP-N) (PTP IA-2)                                                        | Ptprn (Ptp35)                                                    | 30  | 18  | 14 | 10 |
| P14148 | 60S ribosomal protein L7                                                                                                      | Rpl7                                                             | 145 | 52  | 14 | 10 |
| Q03172 | Zinc finger protein 40 (Transcription factor alphaA-CRYBP1) (Alpha A-crystallin-binding protein I) (Alpha A-CRYBP1)           | Hivep1<br>(Cryabp1)<br>(Znf40)                                   | 25  | 24  | 21 | 15 |
| P14869 | 60S acidic ribosomal protein P0 (L10E)                                                                                        | Rplp0 (Arbp)                                                     | 115 | 334 | 28 | 20 |
| P17751 | Triosephosphate isomerase (TIM) (EC 5.3.1.1) (Triose-phosphate isomerase)                                                     | Tpi1 (Tpi)                                                       | 706 | 519 | 35 | 25 |

|        |                                                                                                                                                                                                                               |                              |      |     |    |    |
|--------|-------------------------------------------------------------------------------------------------------------------------------------------------------------------------------------------------------------------------------|------------------------------|------|-----|----|----|
| Q920E5 | Farnesyl pyrophosphate synthetase (FPP synthetase) (FPS) (Farnesyl diphosphate synthetase) (Cholesterol-regulated 39 kDa protein) (CR 39) [Includes: Dimethylallyltransferase (EC 2.5.1.1); Geranyltransferase (EC 2.5.1.10)] | Fdps                         | 107  | 43  | 17 | 12 |
| Q60692 | Proteasome subunit beta type-6 (EC 3.4.25.1) (Proteasome delta chain) (Macropain delta chain) (Multicatalytic endopeptidase complex delta chain) (Proteasome subunit Y)                                                       | Psm6 (Lmp19)                 | 33   | 89  | 17 | 12 |
| P51410 | 60S ribosomal protein L9                                                                                                                                                                                                      | Rpl9                         | 187  | 212 | 17 | 12 |
| Q8BMJ2 | Leucyl-tRNA synthetase, cytoplasmic (EC 6.1.1.4) (Leucine--tRNA ligase) (LeuRS)                                                                                                                                               | Lars                         | 52   | 45  | 47 | 33 |
| Q7TQI3 | Ubiquitin thioesterase OTUB1 (EC 3.1.2.-) (Otubain-1) (OTU domain-containing ubiquitin aldehyde-binding protein 1) (Ubiquitin-specific-processing protease OTUB1) (Deubiquitinating enzyme OTUB1)                             | Otub1                        | 152  | 109 | 10 | 7  |
| Q91YJ5 | Translation initiation factor IF-2, mitochondrial (IF-2Mt) (IF2(mt)) (IF-2(Mt))                                                                                                                                               | Mtif2                        | 29   | 23  | 13 | 9  |
| Q52KI8 | Serine/arginine repetitive matrix protein 1 (Plenty-of-prolines 101)                                                                                                                                                          | Srrm1 (Pop101)               | 22   | 73  | 29 | 20 |
| Q99PV0 | Pre-mRNA-processing-splicing factor 8 (Splicing factor Prp8)                                                                                                                                                                  | Prpf8 (Prp8)                 | 28   | 29  | 51 | 35 |
| Q9CWF2 | Tubulin beta-2B chain                                                                                                                                                                                                         | Tubb2b                       | 1435 | 825 | 86 | 59 |
| P99024 | Tubulin beta-5 chain                                                                                                                                                                                                          | Tubb5                        | 1377 | 976 | 88 | 60 |
| Q80TP3 | E3 ubiquitin-protein ligase UBR5 (EC 6.3.2.-) (E3 ubiquitin-protein ligase, HECT domain-containing 1) (Hyperplastic discs protein homolog)                                                                                    | Ubr5 (Edd) (Edd1) (Kiaa0896) | 27   | 17  | 43 | 29 |
| Q6PHN9 | Ras-related protein Rab-35                                                                                                                                                                                                    | Rab35                        | 17   | 59  | 3  | 2  |

|        |                                                                                                                                                                               |                       |      |     |     |    |
|--------|-------------------------------------------------------------------------------------------------------------------------------------------------------------------------------|-----------------------|------|-----|-----|----|
| Q8C9S8 | Cysteine protease ATG4A (EC 3.4.22.-) (Autophagy-related protein 4 homolog A) (Autophagin-2) (Autophagy-related cysteine endopeptidase 2) (AUT-like 2 cysteine endopeptidase) | Atg4a (Apg4a) (Autl2) | 26   | 21  | 6   | 4  |
| Q99LD8 | N(G),N(G)-dimethylarginine dimethylaminohydrolase 2 (Dimethylarginine dimethylaminohydrolase 2) (DDAH-2) (EC 3.5.3.18) (DDAHII) (Dimethylargininase-2)                        | Ddah2                 | 103  | 92  | 9   | 6  |
| P43275 | Histone H1.1 (H1 VAR.3) (H1a)                                                                                                                                                 | Hist1h1a (H1f1)       | 28   | 90  | 9   | 6  |
| Q9WV07 | Epidermis-type lipoxygenase 3 (e-LOX-3) (EC 1.13.11.-)                                                                                                                        | Aloxe3                | 25   | 22  | 9   | 6  |
| P61979 | Heterogeneous nuclear ribonucleoprotein K (hnRNP K)                                                                                                                           | Hnrnpk (Hnrpk)        | 225  | 46  | 18  | 12 |
| Q8K4L3 | Supervillin (Archvillin) (p205/p250)                                                                                                                                          | Svil                  | 25   | 22  | 18  | 12 |
| O88444 | Adenylate cyclase type 1 (EC 4.6.1.1) (Adenylate cyclase type I) (ATP pyrophosphate-lyase 1) (Adenylyl cyclase 1) (Ca(2+)/calmodulin-activated adenylyl cyclase)              | Adcy1                 | 33   | 31  | 26  | 17 |
| P68372 | Tubulin beta-2C chain                                                                                                                                                         | Tubb2c                | 1300 | 891 | 78  | 51 |
| P42932 | T-complex protein 1 subunit theta (TCP-1-theta) (CCT-theta)                                                                                                                   | Cct8 (Cctq)           | 197  | 57  | 23  | 15 |
| Q924W6 | Tripartite motif-containing protein 66 (Transcriptional intermediary factor 1 delta)                                                                                          | Trim66 (Tif1d)        | 28   | 18  | 23  | 15 |
| O70435 | Proteasome subunit alpha type-3 (EC 3.4.25.1) (Proteasome component C8) (Macropain subunit C8) (Multicatalytic endopeptidase complex subunit C8) (Proteasome subunit K)       | Psma3                 | 95   | 76  | 14  | 9  |
| P40142 | Transketolase (TK) (EC 2.2.1.1) (P68)                                                                                                                                         | Tkt                   | 562  | 250 | 117 | 75 |
| Q9CXW4 | 60S ribosomal protein L11                                                                                                                                                     | Rpl11                 | 72   | 79  | 11  | 7  |



|        |                                                                                                                                                                                                                                                                                                        |                              |      |     |    |    |
|--------|--------------------------------------------------------------------------------------------------------------------------------------------------------------------------------------------------------------------------------------------------------------------------------------------------------|------------------------------|------|-----|----|----|
| Q8CG48 | Structural maintenance of chromosomes protein 2 (Chromosome-associated protein E) (XCAP-E homolog) (FGF-inducible protein 16)                                                                                                                                                                          | Smc2 (Cape) (Fin16) (Smc2l1) | 32   | 36  | 41 | 26 |
| Q7TMM9 | Tubulin beta-2A chain                                                                                                                                                                                                                                                                                  | Tubb2a (Tubb2)               | 1422 | 775 | 83 | 52 |
| Q61983 | Sodium-dependent phosphate transport protein 1 (Sodium/phosphate cotransporter 1) (Na(+)/PI cotransporter 1) (Solute carrier family 17 member 1) (Renal sodium-dependent phosphate transport protein 1) (Renal sodium-phosphate transport protein 1) (Renal Na(+)-dependent phosphate cotransporter 1) | Slc17a1 (Npt1)               | 31   | 33  | 8  | 5  |
| Q9QZ09 | Putative homeodomain transcription factor 1                                                                                                                                                                                                                                                            | Phtf1 (Phtf)                 | 29   | 24  | 8  | 5  |
| Q80U87 | Ubiquitin carboxyl-terminal hydrolase 8 (EC 3.1.2.15) (Ubiquitin thioesterase 8) (Ubiquitin-specific-processing protease 8) (Deubiquitinating enzyme 8) (mUBPy)                                                                                                                                        | Usp8 (Kiaa0055) (Ubpy)       | 29   | 23  | 24 | 15 |
| P62717 | 60S ribosomal protein L18a                                                                                                                                                                                                                                                                             | Rpl18a                       | 242  | 62  | 21 | 13 |
| P16125 | L-lactate dehydrogenase B chain (LDH-B) (EC 1.1.1.27) (LDH heart subunit) (LDH-H)                                                                                                                                                                                                                      | Ldhb (Ldh-2) (Ldh2)          | 315  | 214 | 34 | 21 |
| P17156 | Heat shock-related 70 kDa protein 2 (Heat shock protein 70.2)                                                                                                                                                                                                                                          | Hspa2 (Hcp70.2) (Hsp70-2)    | 964  | 544 | 60 | 37 |
| P84099 | 60S ribosomal protein L19                                                                                                                                                                                                                                                                              | Rpl19                        | 39   | 47  | 13 | 8  |
| P62301 | 40S ribosomal protein S13                                                                                                                                                                                                                                                                              | Rps13                        | 77   | 100 | 23 | 14 |
| O08709 | Peroxiredoxin-6 (EC 1.11.1.15) (Antioxidant protein 2) (1-Cys peroxiredoxin) (1-Cys PRX) (Acidic calcium-independent phospholipase A2) (aiPLA2) (EC 3.1.1.-) (Non-selenium glutathione peroxidase) (NSGPx) (EC 1.11.1.7)                                                                               | Prdx6 (Aop2) (Ltw4) (Prdx5)  | 56   | 29  | 5  | 3  |

|        |                                                                                                                                                                                                                               |                             |      |     |     |    |
|--------|-------------------------------------------------------------------------------------------------------------------------------------------------------------------------------------------------------------------------------|-----------------------------|------|-----|-----|----|
| Q88291 | Zinc finger protein 326 (Zinc finger protein-associated with nuclear matrix of 75 kDa)                                                                                                                                        | Znf326 (Zan75) (Zfp326)     | 41   | 55  | 5   | 3  |
| Q9D1R9 | 60S ribosomal protein L34                                                                                                                                                                                                     | Rpl34                       | 34   | 32  | 10  | 6  |
| Q9EQZ6 | Rap guanine nucleotide exchange factor 4 (cAMP-regulated guanine nucleotide exchange factor II) (cAMP-GEFII) (Exchange factor directly activated by cAMP 2) (Epac 2) (cAMP-dependent Rap1 guanine-nucleotide exchange factor) | Rapgef4 (Cgef2) (Epac2)     | 47   | 23  | 20  | 12 |
| Q8R4K8 | Pappalysin-1 (EC 3.4.24.79) (Pregnancy-associated plasma protein A) (PAPP-A) (Insulin-like growth factor-dependent IGF-binding protein 4 protease) (IGF-dependent IGFBP-4 protease) (IGFBP-4ase)                              | Pappa                       | 41   | 43  | 25  | 15 |
| Q6NZJ6 | Eukaryotic translation initiation factor 4 gamma 1 (eIF-4-gamma 1) (eIF-4G 1) (eIF-4G1)                                                                                                                                       | Eif4g1                      | 47   | 113 | 30  | 18 |
| P63038 | 60 kDa heat shock protein, mitochondrial (Heat shock protein 60) (HSP-60) (Hsp60) (60 kDa chaperonin) (Chaperonin 60) (CPN60) (Mitochondrial matrix protein P1) (HSP-65)                                                      | Hspd1 (Hsp60)               | 15   | 32  | 22  | 13 |
| P80317 | T-complex protein 1 subunit zeta (TCP-1-zeta) (CCT-zeta) (CCT-zeta-1)                                                                                                                                                         | Cct6a (Cct6) (Cctz) (Cctz1) | 160  | 52  | 22  | 13 |
| P10630 | Eukaryotic initiation factor 4A-II (eIF-4A-II) (eIF4A-II) (EC 3.6.1.-) (ATP-dependent RNA helicase eIF4A-2)                                                                                                                   | Eif4a2 (Ddx2b)              | 194  | 78  | 17  | 10 |
| P09041 | Phosphoglycerate kinase 2 (EC 2.7.2.3) (Phosphoglycerate kinase, testis specific)                                                                                                                                             | Pgk2 (Pgk-2)                | 162  | 73  | 17  | 10 |
| P63017 | Heat shock cognate 71 kDa protein (Heat shock 70 kDa protein 8)                                                                                                                                                               | Hspa8 (Hsc70) (Hsc73)       | 1719 | 959 | 119 | 70 |

|        |                                                                                                                                                      |                             |     |     |    |    |
|--------|------------------------------------------------------------------------------------------------------------------------------------------------------|-----------------------------|-----|-----|----|----|
| P05532 | Mast/stem cell growth factor receptor (SCFR) (EC 2.7.10.1) (Proto-oncogene tyrosine-protein kinase Kit) (c-kit) (CD antigen CD117)                   | Kit (SI)                    | 16  | 35  | 12 | 7  |
| P62900 | 60S ribosomal protein L31                                                                                                                            | Rpl31                       | 124 | 62  | 12 | 7  |
| Q9JI78 | Peptide-N(4)-(N-acetyl-beta-glucosaminy)asparagine amidase (PNGase) (mPNGase) (EC 3.5.1.52) (Peptide:N-glycanase) (N-glycanase 1)                    | Ngly1                       | 29  | 32  | 19 | 11 |
| P41105 | 60S ribosomal protein L28                                                                                                                            | Rpl28                       | 49  | 41  | 19 | 11 |
| Q9CZX8 | 40S ribosomal protein S19                                                                                                                            | Rps19                       | 206 | 146 | 19 | 11 |
| P47963 | 60S ribosomal protein L13 (A52)                                                                                                                      | Rpl13                       | 744 | 379 | 47 | 27 |
| P53762 | Aryl hydrocarbon receptor nuclear translocator (ARNT protein) (Dioxin receptor, nuclear translocator) (Hypoxia-inducible factor 1 beta) (HIF-1 beta) | Arnt                        | 25  | 22  | 7  | 4  |
| P47757 | F-actin-capping protein subunit beta (CapZ beta)                                                                                                     | Capzb (Cappb1)              | 107 | 68  | 7  | 4  |
| P26043 | Radixin (ESP10)                                                                                                                                      | Rdx                         | 127 | 106 | 23 | 13 |
| P49722 | Proteasome subunit alpha type-2 (EC 3.4.25.1) (Proteasome component C3) (Macropain subunit C3) (Multicatalytic endopeptidase complex subunit C3)     | Psm2 (Lmpc3)                | 188 | 103 | 16 | 9  |
| Q9R1X4 | Protein timeless homolog (mTim)                                                                                                                      | Timeless (Tim1) (Timeless1) | 22  | 25  | 16 | 9  |
| P97461 | 40S ribosomal protein S5                                                                                                                             | Rps5                        | 89  | 33  | 32 | 18 |
| Q8K2I9 | F-box only protein 18 (EC 3.6.1.-) (F-box DNA helicase 1)                                                                                            | Fbxo18 (Fbh1) (Fbx18)       | 30  | 23  | 9  | 5  |
| P63073 | Eukaryotic translation initiation factor 4E (eIF-4E) (eIF4E) (mRNA cap-binding protein) (eIF-4F 25 kDa subunit)                                      | Eif4e                       | 110 | 25  | 9  | 5  |
| Q64105 | Sepiapterin reductase (SPR) (EC 1.1.1.153)                                                                                                           | Spr                         | 43  | 27  | 9  | 5  |

|        |                                                                                                                                                                                                                                     |                                |      |     |    |    |
|--------|-------------------------------------------------------------------------------------------------------------------------------------------------------------------------------------------------------------------------------------|--------------------------------|------|-----|----|----|
| Q8BYH8 | Chromodomain-helicase-DNA-binding protein 9 (CHD-9) (EC 3.6.1.-) (ATP-dependent helicase CHD9) (Peroxisomal proliferator-activated receptor A-interacting complex 320 kDa protein) (PPAR-alpha-interacting complex protein 320 kDa) | Chd9 (Kiaa0308) (Pric320)      | 39   | 27  | 49 | 27 |
| P17918 | Proliferating cell nuclear antigen (PCNA) (Cyclin)                                                                                                                                                                                  | Pcna                           | 273  | 207 | 20 | 11 |
| O35664 | Interferon-alpha/beta receptor beta chain (Interferon alpha/beta receptor 2) (IFN-alpha-REC) (Type I interferon receptor) (IFN-R)                                                                                                   | Ifnar2                         | 37   | 21  | 11 | 6  |
| Q9WUJ8 | Origin recognition complex subunit 6                                                                                                                                                                                                | Orc6l (Orc6)                   | 59   | 37  | 13 | 7  |
| Q9D6F9 | Tubulin beta-4 chain                                                                                                                                                                                                                | Tubb4                          | 888  | 493 | 58 | 31 |
| O88844 | Isocitrate dehydrogenase [NADP] cytoplasmic (IDH) (EC 1.1.1.42) (Cytosolic NADP-isocitrate dehydrogenase) (Oxalosuccinate decarboxylase) (NADP(+)-specific ICDH) (IDP)                                                              | Idh1                           | 155  | 163 | 15 | 8  |
| Q61390 | T-complex protein 1 subunit zeta-2 (TCP-1-zeta-2) (CCT-zeta-2) (Cctz-2)                                                                                                                                                             | Cct6b                          | 55   | 52  | 15 | 8  |
| P11103 | Poly [ADP-ribose] polymerase 1 (PARP-1) (EC 2.4.2.30) (ADPRT) (NAD(+) ADP-ribosyltransferase 1) (Poly[ADP-ribose] synthetase 1) (msPARP)                                                                                            | Parp1 (Adprp) (Adprt) (Adprt1) | 21   | 26  | 17 | 9  |
| Q922F4 | Tubulin beta-6 chain                                                                                                                                                                                                                | Tubb6                          | 583  | 382 | 40 | 21 |
| P97351 | 40S ribosomal protein S3a                                                                                                                                                                                                           | Rps3a                          | 899  | 392 | 50 | 26 |
| Q9ERD7 | Tubulin beta-3 chain                                                                                                                                                                                                                | Tubb3                          | 780  | 383 | 52 | 27 |
| Q80UE6 | Serine/threonine-protein kinase WNK4 (EC 2.7.11.1) (Protein kinase with no lysine 4) (Protein kinase, lysine-deficient 4)                                                                                                           | Wnk4 (Prkwnk4)                 | 23   | 33  | 29 | 15 |
| P10649 | Glutathione S-transferase Mu 1 (EC 2.5.1.18) (GST class-mu 1) (Glutathione S-transferase GT8.7) (pmGT10) (GST 1-1)                                                                                                                  | Gstm1                          | 1081 | 522 | 61 | 31 |

|                      |                                                                        |                                                                                                                                                                                     |                |     |     |    |    |
|----------------------|------------------------------------------------------------------------|-------------------------------------------------------------------------------------------------------------------------------------------------------------------------------------|----------------|-----|-----|----|----|
| biosynthetic process | P06745                                                                 | Glucose-6-phosphate isomerase (GPI) (EC 5.3.1.9) (Phosphoglucose isomerase) (PGI) (Phosphohexose isomerase) (PHI) (Neuroleukin) (NLK)                                               | Gpi (Gpi1)     | 39  | 107 | 12 | 22 |
|                      | Q64674                                                                 | Spermidine synthase (SPDSY) (EC 2.5.1.16) (Putrescine aminopropyltransferase)                                                                                                       | Srm            | 55  | 29  | 4  | 7  |
|                      | Q8QZR5                                                                 | Alanine aminotransferase 1 (ALT1) (EC 2.6.1.2) (Glutamic--pyruvic transaminase 1) (Glutamate pyruvate transaminase 1) (GPT 1) (Glutamic--alanine transaminase 1)                    | Gpt (Gpt1)     | 25  | 20  | 15 | 26 |
|                      | Q9D009                                                                 | Putative octanoyltransferase, mitochondrial (EC 2.3.1.181) (Octanoyl-[acyl-carrier-protein]-protein N-octanoyltransferase) (Lipoyl/octanoyl transferase) (Lipoate-protein ligase B) |                | 38  | 42  | 11 | 19 |
|                      | Q8R1S0                                                                 | Ubiquinone biosynthesis monooxygenase COQ6 (EC 1.14.13.-)                                                                                                                           | Coq6           | 42  | 92  | 10 | 17 |
|                      | P57776                                                                 | Elongation factor 1-delta (EF-1-delta)                                                                                                                                              | Eef1d          | 109 | 35  | 3  | 5  |
|                      | P35980                                                                 | 60S ribosomal protein L18                                                                                                                                                           | Rpl18          | 32  | 22  | 51 | 85 |
|                      | P15532                                                                 | Nucleoside diphosphate kinase A (NDP kinase A) (NDK A) (EC 2.7.4.6) (Tumor metastatic process-associated protein) (Metastasis inhibition factor NM23) (NDPK-A) (nm23-M1)            | Nme1 (Nm23)    | 150 | 261 | 8  | 13 |
|                      | Q8BGT5                                                                 | Alanine aminotransferase 2 (ALT2) (EC 2.6.1.2) (Glutamic--pyruvic transaminase 2) (Glutamate pyruvate transaminase 2) (GPT 2) (Glutamic--alanine transaminase 2)                    | Gpt2 (Aat2)    | 25  | 20  | 15 | 24 |
|                      | Q6ZWX6                                                                 | Eukaryotic translation initiation factor 2 subunit 1 (Eukaryotic translation initiation factor 2 subunit alpha) (eIF-2-alpha) (EIF-2alpha) (EIF-2A)                                 | Eif2s1 (Eif2a) | 27  | 177 | 7  | 11 |
|                      | P62082                                                                 | 40S ribosomal protein S7                                                                                                                                                            | Rps7           | 104 | 126 | 9  | 14 |
| P63158               | High mobility group protein B1 (High mobility group protein 1) (HMG-1) | Hmgb1 (Hmg-1) (Hmg1)                                                                                                                                                                | 153            | 405 | 25  | 38 |    |

|        |                                                                                                                                                                          |                      |     |     |     |     |
|--------|--------------------------------------------------------------------------------------------------------------------------------------------------------------------------|----------------------|-----|-----|-----|-----|
| Q55142 | 60S ribosomal protein L35a                                                                                                                                               | Rpl35a               | 24  | 50  | 4   | 6   |
| Q99K85 | Phosphoserine aminotransferase (PSAT) (EC 2.6.1.52) (Phosphohydroxythreonine aminotransferase) (Endometrial progesterone-induced protein) (EPIP)                         | Psat1 (Psa) (Psat)   | 162 | 541 | 16  | 24  |
| Q3THW5 | Histone H2A.V (H2A.F/Z)                                                                                                                                                  | H2afv (H2av)         | 297 | 426 | 11  | 16  |
| Q9QZ39 | Alpha-N-acetylgalactosaminide alpha-2,6-sialyltransferase 1 (EC 2.4.99.3) (GalNAc alpha-2,6-sialyltransferase I) (ST6GalNAc I) (Sialyltransferase 7A)                    | St6galnac1 (Siat7a)  | 27  | 18  | 11  | 16  |
| Q8BVI4 | Dihydropteridine reductase (EC 1.5.1.34) (HDHPR) (Quinoid dihydropteridine reductase)                                                                                    | Qdpr (Dhpr)          | 144 | 277 | 7   | 10  |
| O70251 | Elongation factor 1-beta (EF-1-beta)                                                                                                                                     | Eef1b (Eef1b2)       | 39  | 102 | 7   | 10  |
| P17047 | Lysosome-associated membrane glycoprotein 2 (LAMP-2) (Lysosomal membrane glycoprotein type B) (LGP-B) (CD107 antigen-like family member B) (CD antigen CD107b)           | Lamp2 (Lamp-2)       | 26  | 29  | 8   | 11  |
| Q61753 | D-3-phosphoglycerate dehydrogenase (3-PGDH) (EC 1.1.1.95) (A10)                                                                                                          | Phgdh                | 105 | 158 | 14  | 18  |
| P28271 | Cytoplasmic aconitate hydratase (Aconitase) (EC 4.2.1.3) (Citrate hydro-lyase) (Iron-responsive element-binding protein 1) (IRE-BP 1) (Iron regulatory protein 1) (IRP1) | Aco1 (Ireb1) (Irebp) | 77  | 122 | 147 | 184 |
| Q811J3 | Iron-responsive element-binding protein 2 (IRE-BP 2) (Iron regulatory protein 2) (IRP2)                                                                                  | Ireb2 (Irp2)         | 69  | 119 | 142 | 176 |
| Q8BU30 | Isoleucyl-tRNA synthetase, cytoplasmic (EC 6.1.1.5) (Isoleucine--tRNA ligase) (IleRS) (IRS)                                                                              | Iars                 | 85  | 46  | 30  | 37  |
| Q8BGD9 | Eukaryotic translation initiation factor 4B (eIF-4B)                                                                                                                     | Eif4b                | 238 | 306 | 13  | 16  |

|        |                                                                                                                                                                                                       |                            |      |      |     |     |
|--------|-------------------------------------------------------------------------------------------------------------------------------------------------------------------------------------------------------|----------------------------|------|------|-----|-----|
| P59270 | Galactosylgalactosylxylosylprotein 3-beta-glucuronosyltransferase 2 (EC 2.4.1.135) (Beta-1,3-glucuronyltransferase 2) (UDP-glucuronosyltransferase-S) (Glucuronosyltransferase-S) (GlcAT-S) (GlcAT-D) | B3gat2 (Glcats)            | 29   | 16   | 9   | 11  |
| Q9EQC4 | Elongation of very long chain fatty acids protein 4                                                                                                                                                   | Elov14                     | 25   | 18   | 5   | 6   |
| O08810 | 116 kDa U5 small nuclear ribonucleoprotein component (U5 snRNP-specific protein, 116 kDa) (U5-116 kDa) (Elongation factor Tu GTP-binding domain-containing protein 2)                                 | Eftud2 (Snrp116)           | 80   | 68   | 21  | 25  |
| Q8C3X4 | GTP-binding protein GUF1 homolog                                                                                                                                                                      | Guf1                       | 311  | 506  | 412 | 483 |
| P48754 | Breast cancer type 1 susceptibility protein homolog                                                                                                                                                   | Brca1                      | 28   | 25   | 26  | 30  |
| P62270 | 40S ribosomal protein S18 (Ke-3) (Ke3)                                                                                                                                                                | Rps18                      | 210  | 209  | 15  | 17  |
| P62908 | 40S ribosomal protein S3                                                                                                                                                                              | Rps3                       | 778  | 762  | 39  | 44  |
| P19253 | 60S ribosomal protein L13a (Transplantation antigen P198) (Tum-P198 antigen)                                                                                                                          | Rpl13a (P198) (Tstap198-7) | 27   | 65   | 9   | 10  |
| P62631 | Elongation factor 1-alpha 2 (EF-1-alpha-2) (Elongation factor 1 A-2) (eEF1A-2) (Statin S1)                                                                                                            | Eef1a2 (Eef1a1) (Stn)      | 1275 | 1549 | 258 | 285 |
| Q9R0Q7 | Prostaglandin E synthase 3 (EC 5.3.99.3) (Cytosolic prostaglandin E2 synthase) (cPGES) (Telomerase-binding protein p23) (Hsp90 co-chaperone) (Progesterone receptor complex p23) (Sid 3177)           | Ptges3 (Sid3177) (Tebp)    | 124  | 239  | 10  | 11  |
| Q9D8N0 | Elongation factor 1-gamma (EF-1-gamma) (eEF-1B gamma)                                                                                                                                                 | Eef1g                      | 31   | 85   | 11  | 12  |
| Q3THS6 | S-adenosylmethionine synthetase isoform type 2 (AdoMet synthetase 2) (EC 2.5.1.6) (Methionine adenosyltransferase 2)                                                                                  | Mat2a                      | 26   | 42   | 11  | 12  |

|        |                                                                                                                                                                                                                                       |                                    |      |      |     |     |
|--------|---------------------------------------------------------------------------------------------------------------------------------------------------------------------------------------------------------------------------------------|------------------------------------|------|------|-----|-----|
| Q99KK9 | Probable histidyl-tRNA synthetase, mitochondrial (EC 6.1.1.21) (Histidine--tRNA ligase) (HisRS) (Histidine--tRNA ligase-like)                                                                                                         | Hars2 (Harsl)                      | 20   | 41   | 22  | 24  |
| P07901 | Heat shock protein HSP 90-alpha (HSP 86) (Tumor-specific transplantation 86 kDa antigen) (TSTA)                                                                                                                                       | Hsp90aa1 (Hsp86) (Hsp86-1) (Hspca) | 1529 | 2324 | 134 | 146 |
| Q6P9Z1 | SWI/SNF-related matrix-associated actin-dependent regulator of chromatin subfamily D member 3 (60 kDa BRG-1/Brm-associated factor subunit C) (BRG1-associated factor 60C) (mBAF60c)                                                   | Smarcd3 (Baf60c)                   | 29   | 19   | 46  | 50  |
| P10126 | Elongation factor 1-alpha 1 (EF-1-alpha-1) (Elongation factor 1 A-1) (eEF1A-1) (Elongation factor Tu) (EF-Tu)                                                                                                                         | Eef1a1 (Eef1a)                     | 2004 | 2344 | 305 | 330 |
| Q9Z104 | SWI/SNF-related matrix-associated actin-dependent regulator of chromatin subfamily E member 1-related (SMARCE1-related protein) (HMG box-containing protein 20B) (Structural DNA-binding protein BRAF35) (BRCA2-associated factor 35) | Hmg20b (Braf35) (Hmgx2) (Smarce1r) | 30   | 20   | 14  | 15  |
| P62281 | 40S ribosomal protein S11                                                                                                                                                                                                             | Rps11                              | 166  | 132  | 27  | 28  |
| O88693 | Ceramide glucosyltransferase (EC 2.4.1.80) (Glucosylceramide synthase) (GCS) (UDP-glucose:N-acylsphingosine D-glucosyltransferase) (UDP-glucose ceramide glucosyltransferase) (GLCT-1)                                                | Ugcg                               | 37   | 50   | 7   | 7   |
| Q80YV4 | Pantothenate kinase 4 (EC 2.7.1.33) (Pantothenic acid kinase 4) (mPanK4)                                                                                                                                                              | Pank4                              | 23   | 28   | 13  | 13  |
| P11499 | Heat shock protein HSP 90-beta (HSP 84) (Tumor-specific transplantation 84 kDa antigen) (TSTA)                                                                                                                                        | Hsp90ab1 (Hsp84) (Hsp84-1) (Hspcb) | 2943 | 3523 | 208 | 205 |
| P58252 | Elongation factor 2 (EF-2)                                                                                                                                                                                                            | Eef2                               | 1630 | 1718 | 128 | 126 |



|        |                                                                                                                                                                                             |                               |     |     |    |    |
|--------|---------------------------------------------------------------------------------------------------------------------------------------------------------------------------------------------|-------------------------------|-----|-----|----|----|
| P23116 | Eukaryotic translation initiation factor 3 subunit A (eIF3a) (Eukaryotic translation initiation factor 3 subunit 10) (eIF-3-theta) (eIF3 p167) (eIF3 p180) (eIF3 p185) (p162) (Centrosomin) | Eif3a (Csma) (Eif3) (Eif3s10) | 199 | 166 | 58 | 56 |
| Q8BGQ7 | Alanyl-tRNA synthetase, cytoplasmic (EC 6.1.1.7) (Alanine--tRNA ligase) (AlaRS)                                                                                                             | Aars                          | 179 | 216 | 23 | 22 |
| Q91V92 | ATP-citrate synthase (EC 2.3.3.8) (ATP-citrate (pro-S)-lyase) (Citrate cleavage enzyme)                                                                                                     | Acly                          | 349 | 488 | 45 | 43 |
| Q8R1B4 | Eukaryotic translation initiation factor 3 subunit C (eIF3c) (Eukaryotic translation initiation factor 3 subunit 8) (eIF3 p110)                                                             | Eif3c (Eif3s8)                | 34  | 63  | 22 | 21 |
| P54869 | Hydroxymethylglutaryl-CoA synthase, mitochondrial (HMG-CoA synthase) (EC 2.3.3.10) (3-hydroxy-3-methylglutaryl coenzyme A synthase)                                                         | Hmgcs2                        | 26  | 23  | 18 | 17 |
| Q9CPR4 | 60S ribosomal protein L17                                                                                                                                                                   | Rpl17                         | 187 | 135 | 15 | 14 |
| Q8CGC7 | Bifunctional aminoacyl-tRNA synthetase [Includes: Glutamyl-tRNA synthetase (EC 6.1.1.17) (Glutamate--tRNA ligase); Prolyl-tRNA synthetase (EC 6.1.1.15) (Proline--tRNA ligase)]             | Eprs (Qprs)                   | 130 | 102 | 32 | 29 |
| P07310 | Creatine kinase M-type (EC 2.7.3.2) (Creatine kinase M chain) (M-CK)                                                                                                                        | Ckm (Ckmm)                    | 73  | 107 | 31 | 28 |
| Q99104 | Myosin-Va (Dilute myosin heavy chain, non-muscle)                                                                                                                                           | Myo5a (Dilute)                | 28  | 34  | 35 | 31 |
| Q9Z1Q9 | Valyl-tRNA synthetase (EC 6.1.1.9) (Valine--tRNA ligase) (ValRS) (Protein G7a)                                                                                                              | Vars (Bat6) (G7a) (Vars2)     | 380 | 302 | 37 | 32 |
| P67984 | 60S ribosomal protein L22 (Heparin-binding protein HBp15)                                                                                                                                   | Rpl22                         | 59  | 48  | 7  | 6  |
| P35979 | 60S ribosomal protein L12                                                                                                                                                                   | Rpl12                         | 208 | 389 | 14 | 12 |
| Q9CZM2 | 60S ribosomal protein L15                                                                                                                                                                   | Rpl15                         | 225 | 107 | 21 | 18 |

|        |                                                                                                                                                                                                                                                                                                                                                                                                                                                                         |                              |      |      |     |     |
|--------|-------------------------------------------------------------------------------------------------------------------------------------------------------------------------------------------------------------------------------------------------------------------------------------------------------------------------------------------------------------------------------------------------------------------------------------------------------------------------|------------------------------|------|------|-----|-----|
| P11881 | Inositol 1,4,5-trisphosphate receptor type 1 (Type 1 inositol 1,4,5-trisphosphate receptor) (Type 1 InsP3 receptor) (IP3 receptor isoform 1) (InsP3R1) (Inositol 1,4,5-trisphosphate-binding protein P400) (Purkinje cell protein 1) (Protein PCD-6)                                                                                                                                                                                                                    | Itpr1 (Insp3r) (Pcd6) (Pcp1) | 37   | 42   | 48  | 41  |
| Q6ZWN5 | 40S ribosomal protein S9                                                                                                                                                                                                                                                                                                                                                                                                                                                | Rps9                         | 459  | 248  | 47  | 40  |
| P14131 | 40S ribosomal protein S16                                                                                                                                                                                                                                                                                                                                                                                                                                               | Rps16                        | 160  | 126  | 19  | 16  |
| P46664 | Adenylosuccinate synthetase isozyme 2 (AMPSase 2) (AdSS 2) (EC 6.3.4.4) (Adenylosuccinate synthetase, non-muscle isozyme) (Adenylosuccinate synthetase, acidic isozyme) (IMP--aspartate ligase 2)                                                                                                                                                                                                                                                                       | Adss (Adss2)                 | 36   | 66   | 12  | 10  |
| Q05816 | Fatty acid-binding protein, epidermal (E-FABP) (Fatty acid-binding protein 5) (Psoriasis-associated fatty acid-binding protein homolog) (PA-FABP) (Keratinocyte lipid-binding protein)                                                                                                                                                                                                                                                                                  | Fabp5 (Fabpe) (Klbp) (Mal1)  | 331  | 206  | 18  | 15  |
| P11531 | Dystrophin                                                                                                                                                                                                                                                                                                                                                                                                                                                              | Dmd                          | 25   | 16   | 66  | 55  |
| P19096 | Fatty acid synthase (EC 2.3.1.85) [Includes: [Acyl-carrier-protein] S-acetyltransferase (EC 2.3.1.38); [Acyl-carrier-protein] S-malonyltransferase (EC 2.3.1.39); 3-oxoacyl-[acyl-carrier-protein] synthase (EC 2.3.1.41); 3-oxoacyl-[acyl-carrier-protein] reductase (EC 1.1.1.100); 3-hydroxypalmitoyl-[acyl-carrier-protein] dehydratase (EC 4.2.1.61); Enoyl-[acyl-carrier-protein] reductase (EC 1.3.1.10); Oleoyl [acyl-carrier-protein] hydrolase (EC 3.1.2.14)] | Fasn                         | 1869 | 1524 | 163 | 135 |
| P14206 | 40S ribosomal protein SA (Laminin receptor 1) (p40) (34/67 kDa laminin receptor) (37 kDa oncofetal antigen) (OFA/iLRP)                                                                                                                                                                                                                                                                                                                                                  | Rpsa (Lamr1) (P40-8)         | 131  | 112  | 11  | 9   |
| P12970 | 60S ribosomal protein L7a (Surfeit locus protein 3)                                                                                                                                                                                                                                                                                                                                                                                                                     | Rpl7a (Surf-3) (Surf3)       | 111  | 31   | 15  | 12  |

|        |                                                                                                                                                                                                                                        |                                                   |     |     |    |    |
|--------|----------------------------------------------------------------------------------------------------------------------------------------------------------------------------------------------------------------------------------------|---------------------------------------------------|-----|-----|----|----|
| Q8BP67 | 60S ribosomal protein L24                                                                                                                                                                                                              | Rpl24                                             | 354 | 214 | 24 | 19 |
| Q8C196 | Carbamoyl-phosphate synthase [ammonia], mitochondrial (EC 6.3.4.16) (Carbamoyl-phosphate synthetase I) (CPSase I)                                                                                                                      | Cps1                                              | 22  | 25  | 19 | 15 |
| P62754 | 40S ribosomal protein S6 (Phosphoprotein NP33)                                                                                                                                                                                         | Rps6                                              | 127 | 283 | 19 | 15 |
| Q9QWL7 | Keratin, type I cytoskeletal 17 (Cytokeratin-17) (CK-17) (Keratin-17) (K17)                                                                                                                                                            | Krt17 (Krt1-17)                                   | 38  | 46  | 14 | 11 |
| P62702 | 40S ribosomal protein S4, X isoform                                                                                                                                                                                                    | Rps4x (Rps4)                                      | 402 | 304 | 30 | 23 |
| P47856 | Glucosamine--fructose-6-phosphate aminotransferase [isomerizing] 1 (EC 2.6.1.16) (Glutamine:fructose 6 phosphate amidotransferase 1) (GFAT 1) (GFAT1) (D-fructose-6-phosphate amidotransferase 1) (Hexosephosphate aminotransferase 1) | Gfpt1 (Gfpt)                                      | 17  | 29  | 17 | 13 |
| P56480 | ATP synthase subunit beta, mitochondrial (EC 3.6.3.14)                                                                                                                                                                                 | Atp5b                                             | 31  | 50  | 8  | 6  |
| Q9DBP5 | UMP-CMP kinase (EC 2.7.4.14) (Cytidylate kinase) (Deoxycytidylate kinase) (Cytidine monophosphate kinase) (Uridine monophosphate kinase) (Uridine monophosphate/cytidine monophosphate kinase) (UMP/CMP kinase) (UMP/CMPK)             | Cmpk1 (Cmk) (Cmpk) (Uck) (Umk) (Umpk)             | 107 | 93  | 12 | 9  |
| P62751 | 60S ribosomal protein L23a                                                                                                                                                                                                             | Rpl23a                                            | 75  | 49  | 16 | 12 |
| P58681 | Toll-like receptor 7                                                                                                                                                                                                                   | Tlr7                                              | 27  | 33  | 23 | 17 |
| P62264 | 40S ribosomal protein S14                                                                                                                                                                                                              | Rps14                                             | 163 | 166 | 15 | 11 |
| P25444 | 40S ribosomal protein S2 (S4) (LLRep3 protein)                                                                                                                                                                                         | Rps2 (Llrep3) (Rps4)                              | 217 | 50  | 26 | 19 |
| P62991 | Ubiquitin                                                                                                                                                                                                                              | Rps27a (Uba80) (Ubcep1); Uba52 (Ubcep2); Ubb; Ubc | 61  | 54  | 11 | 8  |
| Q9CR57 | 60S ribosomal protein L14                                                                                                                                                                                                              | Rpl14                                             | 508 | 391 | 33 | 24 |
| P27659 | 60S ribosomal protein L3 (J1 protein)                                                                                                                                                                                                  | Rpl3                                              | 192 | 75  | 25 | 18 |

|        |                                                                                                                                                                                                                                         |              |     |     |    |    |
|--------|-----------------------------------------------------------------------------------------------------------------------------------------------------------------------------------------------------------------------------------------|--------------|-----|-----|----|----|
| Q64237 | Dopamine beta-hydroxylase (EC 1.14.17.1) (Dopamine beta-monooxygenase) [Cleaved into: Soluble dopamine beta-hydroxylase]                                                                                                                | Dbh          | 44  | 23  | 7  | 5  |
| P14148 | 60S ribosomal protein L7                                                                                                                                                                                                                | Rpl7         | 145 | 52  | 14 | 10 |
| P14869 | 60S acidic ribosomal protein P0 (L10E)                                                                                                                                                                                                  | Rplp0 (Arbp) | 115 | 334 | 28 | 20 |
| P17751 | Triosephosphate isomerase (TIM) (EC 5.3.1.1) (Triose-phosphate isomerase)                                                                                                                                                               | Tpi1 (Tpi)   | 706 | 519 | 35 | 25 |
| Q920E5 | Farnesyl pyrophosphate synthetase (FPP synthetase) (FPS) (Farnesyl diphosphate synthetase) (Cholesterol-regulated 39 kDa protein) (CR 39) [Includes: Dimethylallyltranstransferase (EC 2.5.1.1); Geranyltranstransferase (EC 2.5.1.10)] | Fdps         | 107 | 43  | 17 | 12 |
| P51410 | 60S ribosomal protein L9                                                                                                                                                                                                                | Rpl9         | 187 | 212 | 17 | 12 |
| Q8BMJ2 | Leucyl-tRNA synthetase, cytoplasmic (EC 6.1.1.4) (Leucine--tRNA ligase) (LeuRS)                                                                                                                                                         | Lars         | 52  | 45  | 47 | 33 |
| Q91YJ5 | Translation initiation factor IF-2, mitochondrial (IF-2Mt) (IF2(mt)) (IF-2(Mt))                                                                                                                                                         | Mtif2        | 29  | 23  | 13 | 9  |
| Q99LD8 | N(G),N(G)-dimethylarginine dimethylaminohydrolase 2 (Dimethylarginine dimethylaminohydrolase 2) (DDAH-2) (EC 3.5.3.18) (DDAHII) (Dimethylargininase-2)                                                                                  | Ddah2        | 103 | 92  | 9  | 6  |
| Q9WV07 | Epidermis-type lipoxygenase 3 (e-LOX-3) (EC 1.13.11.-)                                                                                                                                                                                  | Aloxe3       | 25  | 22  | 9  | 6  |
| O88444 | Adenylate cyclase type 1 (EC 4.6.1.1) (Adenylate cyclase type I) (ATP pyrophosphate-lyase 1) (Adenylyl cyclase 1) (Ca(2+)/calmodulin-activated adenylyl cyclase)                                                                        | Adcy1        | 33  | 31  | 26 | 17 |
| Q9CXW4 | 60S ribosomal protein L11                                                                                                                                                                                                               | Rpl11        | 72  | 79  | 11 | 7  |

|                           |        |                                                                                                                                                                                                                                                                                                        |                |     |     |    |    |
|---------------------------|--------|--------------------------------------------------------------------------------------------------------------------------------------------------------------------------------------------------------------------------------------------------------------------------------------------------------|----------------|-----|-----|----|----|
|                           | Q61983 | Sodium-dependent phosphate transport protein 1 (Sodium/phosphate cotransporter 1) (Na(+)/PI cotransporter 1) (Solute carrier family 17 member 1) (Renal sodium-dependent phosphate transport protein 1) (Renal sodium-phosphate transport protein 1) (Renal Na(+)-dependent phosphate cotransporter 1) | Slc17a1 (Npt1) | 31  | 33  | 8  | 5  |
|                           | P62717 | 60S ribosomal protein L18a                                                                                                                                                                                                                                                                             | Rpl18a         | 242 | 62  | 21 | 13 |
|                           | P84099 | 60S ribosomal protein L19                                                                                                                                                                                                                                                                              | Rpl19          | 39  | 47  | 13 | 8  |
|                           | P62301 | 40S ribosomal protein S13                                                                                                                                                                                                                                                                              | Rps13          | 77  | 100 | 23 | 14 |
|                           | Q9D1R9 | 60S ribosomal protein L34                                                                                                                                                                                                                                                                              | Rpl34          | 34  | 32  | 10 | 6  |
|                           | Q6NZJ6 | Eukaryotic translation initiation factor 4 gamma 1 (eIF-4-gamma 1) (eIF-4G 1) (eIF-4G1)                                                                                                                                                                                                                | Eif4g1         | 47  | 113 | 30 | 18 |
|                           | P10630 | Eukaryotic initiation factor 4A-II (eIF-4A-II) (eIF4A-II) (EC 3.6.1.-) (ATP-dependent RNA helicase eIF4A-2)                                                                                                                                                                                            | Eif4a2 (Ddx2b) | 194 | 78  | 17 | 10 |
|                           | P62900 | 60S ribosomal protein L31                                                                                                                                                                                                                                                                              | Rpl31          | 124 | 62  | 12 | 7  |
|                           | P41105 | 60S ribosomal protein L28                                                                                                                                                                                                                                                                              | Rpl28          | 49  | 41  | 19 | 11 |
|                           | Q9CZX8 | 40S ribosomal protein S19                                                                                                                                                                                                                                                                              | Rps19          | 206 | 146 | 19 | 11 |
|                           | P47963 | 60S ribosomal protein L13 (A52)                                                                                                                                                                                                                                                                        | Rpl13          | 744 | 379 | 47 | 27 |
|                           | P97461 | 40S ribosomal protein S5                                                                                                                                                                                                                                                                               | Rps5           | 89  | 33  | 32 | 18 |
|                           | P63073 | Eukaryotic translation initiation factor 4E (eIF-4E) (eIF4E) (mRNA cap-binding protein) (eIF-4F 25 kDa subunit)                                                                                                                                                                                        | Eif4e          | 110 | 25  | 9  | 5  |
|                           | Q64105 | Sepiapterin reductase (SPR) (EC 1.1.1.153)                                                                                                                                                                                                                                                             | Spr            | 43  | 27  | 9  | 5  |
|                           | P97351 | 40S ribosomal protein S3a                                                                                                                                                                                                                                                                              | Rps3a          | 899 | 392 | 50 | 26 |
| protein metabolic process | Q9CXW3 | Calcyclin-binding protein (CacyBP) (Siah-interacting protein)                                                                                                                                                                                                                                          | Cacybp (Sip)   | 57  | 39  | 7  | 13 |
|                           | Q7TSG3 | F-box only protein 5 (Early mitotic inhibitor 1)                                                                                                                                                                                                                                                       | Fbxo5 (Emi1)   | 15  | 27  | 5  | 9  |
|                           | Q8BYC6 | Serine/threonine-protein kinase TAO3 (EC 2.7.11.1) (Thousand and one amino acid protein 3)                                                                                                                                                                                                             | Taok3          | 32  | 38  | 9  | 16 |

|        |                                                                                                                                                                                     |                |     |      |    |     |
|--------|-------------------------------------------------------------------------------------------------------------------------------------------------------------------------------------|----------------|-----|------|----|-----|
| P62962 | Profilin-1 (Profilin I)                                                                                                                                                             | Pfn1           | 30  | 93   | 4  | 7   |
| P18760 | Cofilin-1 (Cofilin, non-muscle isoform)                                                                                                                                             | Cfl1           | 959 | 2552 | 70 | 122 |
| P17742 | Peptidyl-prolyl cis-trans isomerase A (PPIase A) (Rotamase A) (EC 5.2.1.8) (Cyclophilin A) (Cyclosporin A-binding protein) (SP18)                                                   | Ppia           | 855 | 1549 | 38 | 66  |
| Q9Z1R2 | Large proline-rich protein BAT3 (HLA-B-associated transcript 3)                                                                                                                     | Bat3           | 80  | 49   | 15 | 26  |
| Q9R117 | Non-receptor tyrosine-protein kinase TYK2 (EC 2.7.10.2)                                                                                                                             | Tyk2           | 27  | 30   | 15 | 26  |
| Q9D009 | Putative octanoyltransferase, mitochondrial (EC 2.3.1.181) (Octanoyl-[acyl-carrier-protein]-protein N-octanoyltransferase) (Lipoyl/octanoyl transferase) (Lipoate-protein ligase B) |                | 38  | 42   | 11 | 19  |
| Q9ERK4 | Exportin-2 (Exp2) (Importin-alpha re-exporter) (Chromosome segregation 1-like protein)                                                                                              | Cse1l (Xpo2)   | 42  | 153  | 26 | 44  |
| P57776 | Elongation factor 1-delta (EF-1-delta)                                                                                                                                              | Eef1d          | 109 | 35   | 3  | 5   |
| P35980 | 60S ribosomal protein L18                                                                                                                                                           | Rpl18          | 32  | 22   | 51 | 85  |
| Q8BHG1 | Nardilysin (EC 3.4.24.61) (N-arginine dibasic convertase) (NRD convertase) (NRD-C)                                                                                                  | Nrd1           | 53  | 54   | 13 | 21  |
| Q6ZWX6 | Eukaryotic translation initiation factor 2 subunit 1 (Eukaryotic translation initiation factor 2 subunit alpha) (eIF-2-alpha) (EIF-2alpha) (EIF-2A)                                 | Eif2s1 (Eif2a) | 27  | 177  | 7  | 11  |
| Q80Y17 | Lethal(2) giant larvae protein homolog 1 (LLGL) (Mlg1) (Mgl-1)                                                                                                                      | Llg1 (Llg1h)   | 30  | 29   | 7  | 11  |
| P63001 | Ras-related C3 botulinum toxin substrate 1 (p21-Rac1)                                                                                                                               | Rac1           | 31  | 99   | 7  | 11  |
| P62082 | 40S ribosomal protein S7                                                                                                                                                            | Rps7           | 104 | 126  | 9  | 14  |
| Q9Z1S0 | Mitotic checkpoint serine/threonine-protein kinase BUB1 beta (EC 2.7.11.1) (MAD3/BUB1-related protein kinase) (Mitotic checkpoint kinase MAD3L)                                     | Bub1b (Mad3l)  | 20  | 41   | 15 | 23  |

|        |                                                                                                                                                                    |                                |      |      |    |    |
|--------|--------------------------------------------------------------------------------------------------------------------------------------------------------------------|--------------------------------|------|------|----|----|
| O55142 | 60S ribosomal protein L35a                                                                                                                                         | Rpl35a                         | 24   | 50   | 4  | 6  |
| P83741 | Serine/threonine-protein kinase WNK1 (EC 2.7.11.1) (Protein kinase with no lysine 1) (Protein kinase, lysine-deficient 1)                                          | Wnk1 (Prkwnk1)                 | 56   | 36   | 18 | 27 |
| P97868 | Retinoblastoma-binding protein 6 (p53-associated cellular protein of testis) (Proliferation potential-related protein) (Protein P2P-R)                             | Rbbp6 (P2pr) (Pact)            | 21   | 29   | 24 | 35 |
| P99026 | Proteasome subunit beta type-4 (Proteasome beta chain) (EC 3.4.25.1) (Macropain beta chain) (Multicatalytic endopeptidase complex beta chain) (Proteasome chain 3) | Psmb4 (Lmp3)                   | 93   | 289  | 11 | 16 |
| Q9QZ39 | Alpha-N-acetylgalactosaminide alpha-2,6-sialyltransferase 1 (EC 2.4.99.3) (GalNAc alpha-2,6-sialyltransferase I) (ST6GalNAc I) (Sialyltransferase 7A)              | St6galnac1 (Siat7a)            | 27   | 18   | 11 | 16 |
| P35761 | Dual specificity protein kinase TTK (ESK) (PYT) (EC 2.7.12.1)                                                                                                      | Ttk (Esk)                      | 14   | 34   | 9  | 13 |
| O70251 | Elongation factor 1-beta (EF-1-beta)                                                                                                                               | Eef1b (Eef1b2)                 | 39   | 102  | 7  | 10 |
| Q00342 | FL cytokine receptor (EC 2.7.10.1) (Tyrosine-protein kinase receptor flk-2) (Fetal liver kinase 2) (Tyrosine-protein kinase FLT3) (CD antigen CD135)               | Flt3 (Flk-2) (Flt3)            | 17   | 34   | 7  | 10 |
| Q9Z1F9 | SUMO-activating enzyme subunit 2 (EC 6.3.2.-) (Ubiquitin-like 1-activating enzyme E1B) (Anthracycline-associated resistance ARX)                                   | Uba2 (Sae2) (Uble1b)           | 62   | 77   | 10 | 14 |
| P05214 | Tubulin alpha-3 chain (Tubulin alpha-3/alpha-7 chain) (Alpha-tubulin 3/7) (Alpha-tubulin isotype M-alpha-3/7)                                                      | Tuba3a (Tuba3); Tuba3b (Tuba7) | 1112 | 1288 | 61 | 84 |

|        |                                                                                                                                                                                                                                                                                        |                        |    |     |     |     |
|--------|----------------------------------------------------------------------------------------------------------------------------------------------------------------------------------------------------------------------------------------------------------------------------------------|------------------------|----|-----|-----|-----|
| P17047 | Lysosome-associated membrane glycoprotein 2 (LAMP-2) (Lysosomal membrane glycoprotein type B) (LGP-B) (CD107 antigen-like family member B) (CD antigen CD107b)                                                                                                                         | Lamp2 (Lamp-2)         | 26 | 29  | 8   | 11  |
| Q9EPL8 | Importin-7 (Imp7) (Ran-binding protein 7) (RanBP7)                                                                                                                                                                                                                                     | Ipo7 (Ranbp7)          | 25 | 121 | 9   | 12  |
| Q9WTX2 | Interferon-inducible double stranded RNA-dependent protein kinase activator A (Protein kinase, interferon-inducible double stranded RNA-dependent activator) (Protein activator of the interferon-induced protein kinase) (PKR-associated protein X) (PKR-associating protein X) (RAX) | Prkra (Rax)            | 28 | 39  | 9   | 12  |
| Q9ERU9 | E3 SUMO-protein ligase RanBP2 (Ran-binding protein 2)                                                                                                                                                                                                                                  | Ranbp2                 | 56 | 49  | 40  | 53  |
| P70168 | Importin subunit beta-1 (Karyopherin subunit beta-1) (Nuclear factor P97) (Pore targeting complex 97 kDa subunit) (PTAC97) (SCG)                                                                                                                                                       | Kpnb1 (Impnb)          | 48 | 17  | 13  | 17  |
| Q61846 | Maternal embryonic leucine zipper kinase (EC 2.7.11.1) (Protein kinase PK38) (mPK38)                                                                                                                                                                                                   | Melk (Kiaa0175) (Pk38) | 28 | 32  | 10  | 13  |
| P47753 | F-actin-capping protein subunit alpha-1 (CapZ alpha-1)                                                                                                                                                                                                                                 | Capza1 (Cappa1)        | 60 | 33  | 7   | 9   |
| P28271 | Cytoplasmic aconitate hydratase (Aconitase) (EC 4.2.1.3) (Citrate hydro-lyase) (Iron-responsive element-binding protein 1) (IRE-BP 1) (Iron regulatory protein 1) (IRP1)                                                                                                               | Aco1 (Ireb1) (Irebp)   | 77 | 122 | 147 | 184 |
| Q60716 | Prolyl 4-hydroxylase subunit alpha-2 (EC 1.14.11.2) (4-PH alpha-2) (Procollagen-proline,2-oxoglutarate-4-dioxygenase subunit alpha-2)                                                                                                                                                  | P4ha2                  | 22 | 27  | 8   | 10  |
| Q811J3 | Iron-responsive element-binding protein 2 (IRE-BP 2) (Iron regulatory protein 2) (IRP2)                                                                                                                                                                                                | Ireb2 (Irp2)           | 69 | 119 | 142 | 176 |



|        |                                                                                                                                                                                         |                            |     |     |     |     |
|--------|-----------------------------------------------------------------------------------------------------------------------------------------------------------------------------------------|----------------------------|-----|-----|-----|-----|
| Q61316 | Heat shock 70 kDa protein 4 (Heat shock 70-related protein APG-2)                                                                                                                       | Hspa4 (Apg2) (Hsp110)      | 379 | 792 | 42  | 52  |
| Q8BU30 | Isoleucyl-tRNA synthetase, cytoplasmic (EC 6.1.1.5) (Isoleucine--tRNA ligase) (IleRS) (IRS)                                                                                             | Iars                       | 85  | 46  | 30  | 37  |
| Q8BGD9 | Eukaryotic translation initiation factor 4B (eIF-4B)                                                                                                                                    | Eif4b                      | 238 | 306 | 13  | 16  |
| Q9R1P0 | Proteasome subunit alpha type-4 (EC 3.4.25.1) (Proteasome component C9) (Macropain subunit C9) (Multicatalytic endopeptidase complex subunit C9) (Proteasome subunit L)                 | Psma4                      | 29  | 151 | 14  | 17  |
| Q9CZY3 | Ubiquitin-conjugating enzyme E2 variant 1 (UEV-1) (CROC-1)                                                                                                                              | Ube2v1 (Croc1)             | 83  | 163 | 166 | 201 |
| O08648 | Mitogen-activated protein kinase kinase kinase 4 (EC 2.7.11.25) (MAPK/ERK kinase kinase 4) (MEK kinase 4) (MEKK 4)                                                                      | Map3k4 (Mekk4)             | 37  | 16  | 19  | 23  |
| P49025 | Citron Rho-interacting kinase (CRIK) (EC 2.7.11.1) (Rho-interacting, serine/threonine-protein kinase 21)                                                                                | Cit                        | 49  | 67  | 67  | 81  |
| P47754 | F-actin-capping protein subunit alpha-2 (CapZ alpha-2)                                                                                                                                  | Capza2 (Cappa2)            | 60  | 33  | 5   | 6   |
| O35618 | Protein Mdm4 (p53-binding protein Mdm4) (Mdm2-like p53-binding protein) (Protein Mdmx) (Double minute 4 protein)                                                                        | Mdm4 (Mdmx)                | 17  | 29  | 5   | 6   |
| P54227 | Stathmin (Phosphoprotein p19) (pp19) (Leukemia-associated phosphoprotein p18) (Oncoprotein 18) (Op18) (pp17) (Prosolin) (Metablastin) (Protein Pr22) (Leukemia-associated gene protein) | Stmn1 (Lag) (Lap18) (Pr22) | 121 | 120 | 10  | 12  |
| Q8BFY9 | Transportin-1 (Importin beta-2) (Karyopherin beta-2)                                                                                                                                    | Tnpo1 (Kpnb2)              | 54  | 43  | 10  | 12  |
| Q9QUR6 | Prolyl endopeptidase (PE) (EC 3.4.21.26) (Post-proline cleaving enzyme)                                                                                                                 | Prep (Pep)                 | 56  | 20  | 15  | 18  |
| P80315 | T-complex protein 1 subunit delta (TCP-1-delta) (CCT-delta) (A45)                                                                                                                       | Cct4 (Cctd)                | 61  | 59  | 15  | 18  |

|        |                                                                                                                                                                                                                       |                            |     |     |     |     |
|--------|-----------------------------------------------------------------------------------------------------------------------------------------------------------------------------------------------------------------------|----------------------------|-----|-----|-----|-----|
| O08810 | 116 kDa U5 small nuclear ribonucleoprotein component (U5 snRNP-specific protein, 116 kDa) (U5-116 kDa) (Elongation factor Tu GTP-binding domain-containing protein 2)                                                 | Eftud2 (Snrp116)           | 80  | 68  | 21  | 25  |
| P80313 | T-complex protein 1 subunit eta (TCP-1-eta) (CCT-eta)                                                                                                                                                                 | Cct7 (Ccth)                | 49  | 50  | 11  | 13  |
| Q8C3X4 | GTP-binding protein GUF1 homolog                                                                                                                                                                                      | Guf1                       | 311 | 506 | 412 | 483 |
| Q62418 | Drebrin-like protein (SH3 domain-containing protein 7) (Actin-binding protein 1)                                                                                                                                      | Dbnl (Abp1) (Sh3p7)        | 24  | 39  | 7   | 8   |
| Q6A4J8 | Ubiquitin carboxyl-terminal hydrolase 7 (EC 3.1.2.15) (Ubiquitin thioesterase 7) (Ubiquitin-specific-processing protease 7) (Deubiquitinating enzyme 7) (Herpesvirus-associated ubiquitin-specific protease) (mHAUSP) | Usp7 (Hausp)               | 27  | 18  | 14  | 16  |
| P58660 | Caspase recruitment domain-containing protein 10 (Bcl10-interacting MAGUK protein 1) (Bimp1)                                                                                                                          | Card10 (Bimp1)             | 33  | 23  | 15  | 17  |
| P97820 | Mitogen-activated protein kinase kinase kinase kinase 4 (EC 2.7.11.1) (MAPK/ERK kinase kinase kinase 4) (MEK kinase kinase 4) (MEKKK 4) (HPK/GCK-like kinase HGK) (Nck-interacting kinase)                            | Map4k4 (Nik)               | 65  | 54  | 15  | 17  |
| P62270 | 40S ribosomal protein S18 (Ke-3) (Ke3)                                                                                                                                                                                | Rps18                      | 210 | 209 | 15  | 17  |
| P55200 | Histone-lysine N-methyltransferase HRX (EC 2.1.1.43) (Zinc finger protein HRX) (ALL-1)                                                                                                                                | Mll (All1) (Hrx) (Mll1)    | 67  | 26  | 39  | 44  |
| P62908 | 40S ribosomal protein S3                                                                                                                                                                                              | Rps3                       | 778 | 762 | 39  | 44  |
| P26618 | Alpha-type platelet-derived growth factor receptor (EC 2.7.10.1) (PDGF-R-alpha) (CD140 antigen-like family member A) (CD antigen CD140a)                                                                              | Pdgfra                     | 37  | 73  | 160 | 178 |
| P19253 | 60S ribosomal protein L13a (Transplantation antigen P198) (Tum-P198 antigen)                                                                                                                                          | Rpl13a (P198) (Tstap198-7) | 27  | 65  | 9   | 10  |

|        |                                                                                                                                                                                                    |                                    |      |      |     |     |
|--------|----------------------------------------------------------------------------------------------------------------------------------------------------------------------------------------------------|------------------------------------|------|------|-----|-----|
| P62631 | Elongation factor 1-alpha 2 (EF-1-alpha-2) (Elongation factor 1 A-2) (eEF1A-2) (Statin S1)                                                                                                         | Eef1a2 (Eef1al) (Strn)             | 1275 | 1549 | 258 | 285 |
| Q62446 | FK506-binding protein 3 (EC 5.2.1.8) (Peptidyl-prolyl cis-trans isomerase) (PPIase) (Rotamase) (25 kDa FKBP) (FKBP-25) (Rapamycin-selective 25 kDa immunophilin)                                   | Fkbp3 (Fkbp25)                     | 31   | 31   | 10  | 11  |
| O55234 | Proteasome subunit beta type-5 (EC 3.4.25.1) (Proteasome epsilon chain) (Macropain epsilon chain) (Multicatalytic endopeptidase complex epsilon chain) (Proteasome subunit X) (Proteasome chain 6) | Psmb5                              | 168  | 227  | 10  | 11  |
| Q9D8N0 | Elongation factor 1-gamma (EF-1-gamma) (eEF-1B gamma)                                                                                                                                              | Eef1g                              | 31   | 85   | 11  | 12  |
| Q99KK9 | Probable histidyl-tRNA synthetase, mitochondrial (EC 6.1.1.21) (Histidine--tRNA ligase) (HisRS) (Histidine--tRNA ligase-like)                                                                      | Hars2 (Harsl)                      | 20   | 41   | 22  | 24  |
| P27546 | Microtubule-associated protein 4 (MAP-4)                                                                                                                                                           | Map4 (Mtap4)                       | 94   | 41   | 33  | 36  |
| P07901 | Heat shock protein HSP 90-alpha (HSP 86) (Tumor-specific transplantation 86 kDa antigen) (TSTA)                                                                                                    | Hsp90aa1 (Hsp86) (Hsp86-1) (Hspca) | 1529 | 2324 | 134 | 146 |
| Q6P9Z1 | SWI/SNF-related matrix-associated actin-dependent regulator of chromatin subfamily D member 3 (60 kDa BRG-1/Brm-associated factor subunit C) (BRG1-associated factor 60C) (mBAF60c)                | Smarcd3 (Baf60c)                   | 29   | 19   | 46  | 50  |
| P38647 | Stress-70 protein, mitochondrial (75 kDa glucose-regulated protein) (GRP 75) (Heat shock 70 kDa protein 9) (Peptide-binding protein 74) (PBP74) (P66 MOT) (Mortalin)                               | Hspa9 (Grp75) (Hsp74) (Hspa9a)     | 33   | 33   | 12  | 13  |

|        |                                                                                                                                                                                                                                                                                                                                        |                                    |      |      |     |     |
|--------|----------------------------------------------------------------------------------------------------------------------------------------------------------------------------------------------------------------------------------------------------------------------------------------------------------------------------------------|------------------------------------|------|------|-----|-----|
| Q8BKC5 | Importin-5 (Imp5) (Importin subunit beta-3) (Karyopherin beta-3) (Ran-binding protein 5) (RanBP5)                                                                                                                                                                                                                                      | Ipo5 (Kpnb3) (Ranbp5)              | 185  | 91   | 12  | 13  |
| P10126 | Elongation factor 1-alpha 1 (EF-1-alpha-1) (Elongation factor 1 A-1) (eEF1A-1) (Elongation factor Tu) (EF-Tu)                                                                                                                                                                                                                          | Eef1a1 (Eef1a)                     | 2004 | 2344 | 305 | 330 |
| P08113 | Endoplasmic (Heat shock protein 90 kDa beta member 1) (94 kDa glucose-regulated protein) (GRP94) (ERP99) (Polymorphic tumor rejection antigen 1) (Tumor rejection antigen gp96)                                                                                                                                                        | Hsp90b1 (Tra-1) (Tra1)             | 221  | 298  | 25  | 27  |
| Q9Z104 | SWI/SNF-related matrix-associated actin-dependent regulator of chromatin subfamily E member 1-related (SMARCE1-related protein) (HMG box-containing protein 20B) (Structural DNA-binding protein BRAF35) (BRCA2-associated factor 35)                                                                                                  | Hmg20b (Braf35) (Hmgx2) (Smarce1r) | 30   | 20   | 14  | 15  |
| P11984 | T-complex protein 1 subunit alpha A (TCP-1-alpha) (CCT-alpha) (Tailless complex polypeptide 1A) (TCP-1-A)                                                                                                                                                                                                                              | Cct1 (Ccta) (Tcp1)                 | 29   | 66   | 14  | 15  |
| P70398 | Probable ubiquitin carboxyl-terminal hydrolase FAF-X (EC 3.1.2.15) (Ubiquitin thioesterase FAF-X) (Ubiquitin-specific-processing protease FAF-X) (Deubiquitinating enzyme FAF-X) (Fat facets protein-related, X-linked) (Ubiquitin-specific protease 9, X chromosome) (Ubiquitin carboxyl-terminal hydrolase FAM) (Fat facets homolog) | Usp9x (Faf1) (Fam)                 | 42   | 28   | 57  | 61  |
| Q8BKX6 | Serine/threonine-protein kinase SMG1 (SMG-1) (EC 2.7.11.1)                                                                                                                                                                                                                                                                             | Smg1 (Kiaa0421)                    | 33   | 27   | 30  | 32  |
| Q8VI56 | Low-density lipoprotein receptor-related protein 4 (LDLR dan)                                                                                                                                                                                                                                                                          | Lrp4 (Kiaa0816)                    | 77   | 30   | 19  | 20  |
| P16546 | Spectrin alpha chain, brain (Spectrin, non-erythroid alpha chain) (Alpha-II spectrin) (Fodrin alpha chain)                                                                                                                                                                                                                             | Sptan1 (Spna2) (Spta2)             | 68   | 86   | 66  | 69  |

|        |                                                                                                                                                                                                        |               |     |     |     |     |
|--------|--------------------------------------------------------------------------------------------------------------------------------------------------------------------------------------------------------|---------------|-----|-----|-----|-----|
| Q920R0 | Alsin (Amyotrophic lateral sclerosis protein 2 homolog)                                                                                                                                                | Als2          | 74  | 88  | 72  | 75  |
| P62281 | 40S ribosomal protein S11                                                                                                                                                                              | Rps11         | 166 | 132 | 27  | 28  |
| Q9JM05 | E3 SUMO-protein ligase PIAS4 (Protein inhibitor of activated STAT protein 4) (Protein inhibitor of activated STAT protein gamma) (PIAS-gamma) (PIASy)                                                  | Pias4 (Piasg) | 26  | 29  | 162 | 165 |
| P62141 | Serine/threonine-protein phosphatase PP1-beta catalytic subunit (PP-1B) (EC 3.1.3.16)                                                                                                                  | Ppp1cb        | 177 | 57  | 4   | 4   |
| P12367 | cAMP-dependent protein kinase type II-alpha regulatory subunit                                                                                                                                         | Prkar2a       | 33  | 23  | 5   | 5   |
| Q9R1P1 | Proteasome subunit beta type-3 (EC 3.4.25.1) (Proteasome theta chain) (Proteasome chain 13) (Proteasome component C10-II)                                                                              | Psmb3         | 87  | 135 | 7   | 7   |
| P30416 | FK506-binding protein 4 (EC 5.2.1.8) (Peptidyl-prolyl cis-trans isomerase) (PPIase) (Rotamase) (HSP-binding immunophilin) (HBI) (FKBP52 protein) (52 kDa FK506-binding protein) (FKBP59) (p59 protein) | Fkbp4         | 40  | 62  | 8   | 8   |
| Q6P5F9 | Exportin-1 (Exp1) (Chromosome region maintenance 1 protein homolog)                                                                                                                                    | Xpo1 (Crm1)   | 19  | 43  | 9   | 9   |
| O09061 | Proteasome subunit beta type-1 (EC 3.4.25.1) (Proteasome component C5) (Macropain subunit C5) (Multicatalytic endopeptidase complex subunit C5) (Proteasome gamma chain)                               | Psmb1         | 84  | 94  | 11  | 11  |
| Q9DB77 | Cytochrome b-c1 complex subunit 2, mitochondrial (Ubiquinol-cytochrome-c reductase complex core protein 2) (Core protein II) (Complex III subunit 2)                                                   | Uqcrc2        | 29  | 20  | 13  | 13  |
| Q9JIF7 | Coatomer subunit beta (Beta-coat protein) (Beta-COP)                                                                                                                                                   | Copb1 (Copb)  | 37  | 22  | 15  | 15  |

|        |                                                                                                                                                                                                              |                                        |      |      |     |     |
|--------|--------------------------------------------------------------------------------------------------------------------------------------------------------------------------------------------------------------|----------------------------------------|------|------|-----|-----|
| Q01098 | Glutamate [NMDA] receptor subunit epsilon-3 (N-methyl D-aspartate receptor subtype 2C) (NMDAR2C) (NR2C)                                                                                                      | Grin2c                                 | 18   | 33   | 15  | 15  |
| Q8R4K2 | Interleukin-1 receptor-associated kinase 4 (IRAK-4) (EC 2.7.11.1)                                                                                                                                            | Irak4                                  | 32   | 47   | 22  | 22  |
| Q62261 | Spectrin beta chain, brain 1 (Spectrin, non-erythroid beta chain 1) (Beta-II spectrin) (Fodrin beta chain) (Embryonic liver fodrin)                                                                          | Sptbn1 (Elf) (Spnb-2) (Spnb2) (Sptb2)  | 56   | 54   | 48  | 48  |
| P11499 | Heat shock protein HSP 90-beta (HSP 84) (Tumor-specific transplantation 84 kDa antigen) (TSTA)                                                                                                               | Hsp90ab1 (Hsp84) (Hsp84-1) (Hspcb)     | 2943 | 3523 | 208 | 205 |
| P58252 | Elongation factor 2 (EF-2)                                                                                                                                                                                   | Eef2                                   | 1630 | 1718 | 128 | 126 |
| P23116 | Eukaryotic translation initiation factor 3 subunit A (eIF3a) (Eukaryotic translation initiation factor 3 subunit 10) (eIF-3-theta) (eIF3 p167) (eIF3 p180) (eIF3 p185) (p162) (Centrosomin)                  | Eif3a (Csma) (Eif3) (Eif3s10)          | 199  | 166  | 58  | 56  |
| O08638 | Myosin-11 (Myosin heavy chain 11) (Myosin heavy chain, smooth muscle isoform) (SMMHC)                                                                                                                        | Myh11                                  | 211  | 221  | 79  | 76  |
| Q8R4B8 | NACHT, LRR and PYD domains-containing protein 3 (Cold autoinflammatory syndrome 1 protein homolog) (Cryopyrin) (PYRIN-containing APAF1-like protein 1) (Mast cell maturation-associated-inducible protein 1) | Nlrp3 (Cias1) (Mmig1) (Nalp3) (Pypaf1) | 30   | 20   | 24  | 23  |
| P16406 | Glutamyl aminopeptidase (EC 3.4.11.7) (EAP) (Aminopeptidase A) (APA) (BP-1/6C3 antigen) (CD antigen CD249)                                                                                                   | Enpep                                  | 98   | 90   | 48  | 46  |
| Q8BGQ7 | Alanyl-tRNA synthetase, cytoplasmic (EC 6.1.1.7) (Alanine--tRNA ligase) (AlaRS)                                                                                                                              | Aars                                   | 179  | 216  | 23  | 22  |
| Q8R1B4 | Eukaryotic translation initiation factor 3 subunit C (eIF3c) (Eukaryotic translation initiation factor 3 subunit 8) (eIF3 p110)                                                                              | Eif3c (Eif3s8)                         | 34   | 63   | 22  | 21  |
| Q9CPR4 | 60S ribosomal protein L17                                                                                                                                                                                    | Rpl17                                  | 187  | 135  | 15  | 14  |

|        |                                                                                                                                                                                                                     |                          |     |     |     |     |
|--------|---------------------------------------------------------------------------------------------------------------------------------------------------------------------------------------------------------------------|--------------------------|-----|-----|-----|-----|
| Q7TMY8 | E3 ubiquitin-protein ligase HUWE1 (EC 6.3.2.-) (HECT, UBA and WWE domain-containing protein 1) (Upstream regulatory element-binding protein 1) (URE-binding protein 1) (URE-B1) (E3Histone)                         | Huwe1 (Kiaa0312) (Ureb1) | 33  | 91  | 39  | 36  |
| P35969 | Vascular endothelial growth factor receptor 1 (VEGFR-1) (EC 2.7.10.1) (Tyrosine-protein kinase receptor FLT) (FLT-1) (Embryonic receptor kinase 2)                                                                  | Flt1 (Emrk2) (Flt)       | 29  | 36  | 35  | 32  |
| Q01853 | Transitional endoplasmic reticulum ATPase (TER ATPase) (15S Mg(2+)-ATPase p97 subunit) (Valosin-containing protein) (VCP)                                                                                           | Vcp                      | 691 | 699 | 56  | 51  |
| Q9WTR0 | Matrix metalloproteinase-16 (MMP-16) (EC 3.4.24.-) (Membrane-type matrix metalloproteinase 3) (MT-MMP 3) (MTMMP3) (Membrane-type-3 matrix metalloproteinase) (MT3-MMP) (MT3MMP)                                     | Mmp16                    | 17  | 36  | 11  | 10  |
| Q8CGC7 | Bifunctional aminoacyl-tRNA synthetase [Includes: Glutamyl-tRNA synthetase (EC 6.1.1.17) (Glutamate--tRNA ligase); Prolyl-tRNA synthetase (EC 6.1.1.15) (Proline--tRNA ligase)]                                     | Eprs (Qprs)              | 130 | 102 | 32  | 29  |
| Q8VDD5 | Myosin-9 (Myosin heavy chain 9) (Myosin heavy chain, non-muscle IIa) (Non-muscle myosin heavy chain IIa) (NMMHC II-a) (NMMHC-IIA) (Cellular myosin heavy chain, type A) (Non-muscle myosin heavy chain-A) (NMMHC-A) | Myh9                     | 780 | 839 | 127 | 115 |
| Q9QZH3 | Peptidyl-prolyl cis-trans isomerase E (PPIase E) (Rotamase E) (EC 5.2.1.8) (Cyclophilin E) (Cyclophilin-33)                                                                                                         | Ppie (Cyp33)             | 28  | 35  | 10  | 9   |
| Q68FD5 | Clathrin heavy chain 1                                                                                                                                                                                              | Cltc                     | 944 | 884 | 88  | 78  |
| Q9R0P5 | Destrin (Actin-depolymerizing factor) (ADF) (Sid 23)                                                                                                                                                                | Dstn (Dsn) (Sid23)       | 61  | 81  | 8   | 7   |

|        |                                                                                                                                                                 |                                    |     |      |    |    |
|--------|-----------------------------------------------------------------------------------------------------------------------------------------------------------------|------------------------------------|-----|------|----|----|
| P70195 | Proteasome subunit beta type-7 (EC 3.4.25.1) (Proteasome subunit Z) (Macropain chain Z) (Multicatalytic endopeptidase complex chain Z)                          | Psmb7 (Mmc14)                      | 39  | 40   | 8  | 7  |
| Q02053 | Ubiquitin-like modifier-activating enzyme 1 (Ubiquitin-activating enzyme E1) (Ubiquitin-like modifier-activating enzyme 1 X) (Ubiquitin-activating enzyme E1 X) | Uba1 (Sbx) (Ube1) (Ube1ax) (Ube1x) | 660 | 1086 | 63 | 55 |
| Q8VHE6 | Dynein heavy chain 5, axonemal (Axonemal beta dynein heavy chain 5) (Mdnah5) (Ciliary dynein heavy chain 5)                                                     | Dnah5 (Dnahc5)                     | 47  | 44   | 83 | 72 |
| Q11011 | Puromycin-sensitive aminopeptidase (PSA) (EC 3.4.11.-)                                                                                                          | Npepps (Psa)                       | 71  | 141  | 30 | 26 |
| Q9Z1Q9 | Valyl-tRNA synthetase (EC 6.1.1.9) (Valine--tRNA ligase) (ValRS) (Protein G7a)                                                                                  | Vars (Bat6) (G7a) (Vars2)          | 380 | 302  | 37 | 32 |
| Q9JJK8 | Serine/threonine-protein kinase ATR (EC 2.7.11.1) (Ataxia telangiectasia and Rad3-related protein)                                                              | Atr                                | 20  | 25   | 72 | 62 |
| Q9D868 | Peptidyl-prolyl cis-trans isomerase H (PPIase H) (Rotamase H) (EC 5.2.1.8)                                                                                      | Ppih                               | 55  | 31   | 7  | 6  |
| P67984 | 60S ribosomal protein L22 (Heparin-binding protein HBp15)                                                                                                       | Rpl22                              | 59  | 48   | 7  | 6  |
| O88866 | Hormonally up-regulated neu tumor-associated kinase (EC 2.7.11.1) (Serine/threonine-protein kinase MAK-V)                                                       | Hunk (Makv)                        | 27  | 21   | 14 | 12 |
| P35979 | 60S ribosomal protein L12                                                                                                                                       | Rpl12                              | 208 | 389  | 14 | 12 |
| P97784 | Cryptochrome-1                                                                                                                                                  | Cry1                               | 52  | 42   | 21 | 18 |
| Q9R194 | Cryptochrome-2                                                                                                                                                  | Cry2 (Kiaa0658)                    | 52  | 42   | 21 | 18 |
| Q9CZM2 | 60S ribosomal protein L15                                                                                                                                       | Rpl15                              | 225 | 107  | 21 | 18 |
| Q6ZWN5 | 40S ribosomal protein S9                                                                                                                                        | Rps9                               | 459 | 248  | 47 | 40 |



|        |                                                                                                                                                                                                                |                             |     |     |    |    |
|--------|----------------------------------------------------------------------------------------------------------------------------------------------------------------------------------------------------------------|-----------------------------|-----|-----|----|----|
| Q9JM52 | Misshapen-like kinase 1 (EC 2.7.11.1)<br>(Mitogen-activated protein kinase kinase kinase 6) (MAPK/ERK kinase kinase 6) (MEK kinase kinase 6) (MEKKK 6) (Misshapen/NIK-related kinase) (GCK family kinase MiNK) | Mink1<br>(Map4k6)<br>(Mink) | 18  | 54  | 13 | 11 |
| Q9CQN1 | Heat shock protein 75 kDa, mitochondrial (HSP 75) (Tumor necrosis factor type 1 receptor-associated protein) (TRAP-1) (TNFR-associated protein 1)                                                              | Trap1 (Hsp75)               | 197 | 335 | 13 | 11 |
| P14131 | 40S ribosomal protein S16                                                                                                                                                                                      | Rps16                       | 160 | 126 | 19 | 16 |
| P20029 | 78 kDa glucose-regulated protein (GRP 78) (Heat shock 70 kDa protein 5) (Immunoglobulin heavy chain-binding protein) (BiP)                                                                                     | Hspa5 (Grp78)               | 262 | 312 | 25 | 21 |
| Q99PP7 | E3 ubiquitin-protein ligase TRIM33 (EC 6.3.2.-) (Tripartite motif-containing protein 33) (Transcription intermediary factor 1-gamma) (TIF1-gamma) (Ectodermin homolog)                                         | Trim33<br>(Kiaa1113)        | 33  | 25  | 12 | 10 |
| P11983 | T-complex protein 1 subunit alpha B (TCP-1-alpha) (CCT-alpha) (Tailless complex polypeptide 1B) (TCP-1-B)                                                                                                      | Cct1 (Ccta)<br>(Tcp1)       | 29  | 66  | 18 | 15 |
| Q64514 | Tripeptidyl-peptidase 2 (EC 3.4.14.10) (Tripeptidyl-peptidase II) (TPP-II) (Tripeptidyl aminopeptidase)                                                                                                        | Tpp2                        | 54  | 76  | 24 | 20 |
| P20357 | Microtubule-associated protein 2 (MAP-2)                                                                                                                                                                       | Map2 (Mtap2)                | 50  | 22  | 30 | 25 |
| P11531 | Dystrophin                                                                                                                                                                                                     | Dmd                         | 25  | 16  | 66 | 55 |
| Q91XQ0 | Dynein heavy chain 8, axonemal (Axonemal beta dynein heavy chain 8) (Ciliary dynein heavy chain 8)                                                                                                             | Dnahc8                      | 47  | 51  | 77 | 64 |
| P80316 | T-complex protein 1 subunit epsilon (TCP-1-epsilon) (CCT-epsilon)                                                                                                                                              | Cct5 (Ccte)<br>(Kiaa0098)   | 239 | 102 | 17 | 14 |
| P14206 | 40S ribosomal protein SA (Laminin receptor 1) (p40) (34/67 kDa laminin receptor) (37 kDa oncofetal antigen) (OFA/iLRP)                                                                                         | Rpsa (Lamr1)<br>(P40-8)     | 131 | 112 | 11 | 9  |

|        |                                                                                                                                                                                        |                               |     |     |    |    |
|--------|----------------------------------------------------------------------------------------------------------------------------------------------------------------------------------------|-------------------------------|-----|-----|----|----|
| Q6ZQ38 | Cullin-associated NEDD8-dissociated protein 1 (Cullin-associated and neddylation-dissociated protein 1) (p120 CAND1)                                                                   | Cand1 (D10Ert516e) (Kiaa0829) | 221 | 246 | 33 | 27 |
| Q80ZW0 | Serine/threonine-protein kinase 35 (EC 2.7.11.1)                                                                                                                                       | Stk35                         | 14  | 50  | 21 | 17 |
| Q64512 | Tyrosine-protein phosphatase non-receptor type 13 (EC 3.1.3.48) (Protein tyrosine phosphatase PTP-BL) (Protein-tyrosine phosphatase RIP) (Protein tyrosine phosphatase DPZPTP) (PTP36) | Ptpn13 (Ptp14)                | 28  | 27  | 26 | 21 |
| Q62407 | Striated muscle-specific serine/threonine protein kinase (EC 2.7.11.1) (Aortic preferentially expressed protein 1) (APEG-1)                                                            | Speg (Apeg1) (Kiaa1297)       | 26  | 20  | 31 | 25 |
| Q5XJY5 | Coatamer subunit delta (Delta-coat protein) (Delta-COP) (Archain)                                                                                                                      | Arcn1 (Copd)                  | 61  | 45  | 10 | 8  |
| P54923 | [Protein ADP-ribosylarginine] hydrolase (ADP-ribosylarginine hydrolase) (EC 3.2.2.19) (ADP-ribose-L-arginine cleaving enzyme)                                                          | Adprh (Arh1)                  | 20  | 41  | 15 | 12 |
| Q9Z2U0 | Proteasome subunit alpha type-7 (EC 3.4.25.1) (Proteasome subunit RC6-1)                                                                                                               | Psm7                          | 121 | 253 | 15 | 12 |
| P12970 | 60S ribosomal protein L7a (Surfeit locus protein 3)                                                                                                                                    | Rpl7a (Surf-3) (Surf3)        | 111 | 31  | 15 | 12 |
| Q8BP67 | 60S ribosomal protein L24                                                                                                                                                              | Rpl24                         | 354 | 214 | 24 | 19 |
| Q80Z16 | E3 ubiquitin-protein ligase LRSAM1 (EC 6.3.2.-) (Leucine-rich repeat and sterile alpha motif-containing protein 1) (Tsg101-associated ligase)                                          | Lrsam1                        | 19  | 35  | 19 | 15 |
| P62754 | 40S ribosomal protein S6 (Phosphoprotein NP33)                                                                                                                                         | Rps6                          | 127 | 283 | 19 | 15 |
| Q9QWL7 | Keratin, type I cytoskeletal 17 (Cytokeratin-17) (CK-17) (Keratin-17) (K17)                                                                                                            | Krt17 (Krt1-17)               | 38  | 46  | 14 | 11 |

|        |                                                                                                                                                      |                                                   |     |     |     |     |
|--------|------------------------------------------------------------------------------------------------------------------------------------------------------|---------------------------------------------------|-----|-----|-----|-----|
| Q9JHU4 | Cytoplasmic dynein 1 heavy chain 1 (Cytoplasmic dynein heavy chain 1) (Dynein heavy chain, cytosolic)                                                | Dync1h1 (Dhc1) (Dnch1) (Dnchc1) (Dyhc)            | 822 | 395 | 157 | 123 |
| P31254 | Ubiquitin-like modifier-activating enzyme 1 Y (Ubiquitin-activating enzyme E1 Y) (Ubiquitin-activating enzyme E1)                                    | Ube1ay (Sby) (Ube1y) (Ube1y1)                     | 161 | 77  | 22  | 17  |
| Q8CGK3 | Lon protease homolog, mitochondrial (EC 3.4.21.-) (Lon protease-like protein) (LONP) (Mitochondrial ATP-dependent protease Lon) (Serine protease 15) | Lonp1 (Prss15)                                    | 21  | 30  | 43  | 33  |
| P62702 | 40S ribosomal protein S4, X isoform                                                                                                                  | Rps4x (Rps4)                                      | 402 | 304 | 30  | 23  |
| Q8JZQ2 | AFG3-like protein 2 (EC 3.4.24.-)                                                                                                                    | Afg3l2                                            | 15  | 27  | 17  | 13  |
| P16627 | Heat shock 70 kDa protein 1L (Heat shock 70 kDa protein 1-like) (Heat shock 70 kDa-like protein 1) (Spermatid-specific heat shock protein 70)        | Hspa1l (Hsc70t)                                   | 319 | 238 | 33  | 25  |
| Q02956 | Protein kinase C zeta type (EC 2.7.11.13) (nPKC-zeta)                                                                                                | Prkcz (PkcZ)                                      | 29  | 15  | 8   | 6   |
| P62751 | 60S ribosomal protein L23a                                                                                                                           | Rpl23a                                            | 75  | 49  | 16  | 12  |
| Q8K045 | Serine/threonine-protein kinase N3 (EC 2.7.11.13) (Protein kinase PKN-beta) (Protein-kinase C-related kinase 3)                                      | Pkn3 (Pknbeta)                                    | 130 | 126 | 36  | 27  |
| P58681 | Toll-like receptor 7                                                                                                                                 | Tlr7                                              | 27  | 33  | 23  | 17  |
| P62264 | 40S ribosomal protein S14                                                                                                                            | Rps14                                             | 163 | 166 | 15  | 11  |
| P25444 | 40S ribosomal protein S2 (S4) (LLRep3 protein)                                                                                                       | Rps2 (Llrep3) (Rps4)                              | 217 | 50  | 26  | 19  |
| P62991 | Ubiquitin                                                                                                                                            | Rps27a (Uba80) (Ubcep1); Uba52 (Ubcep2); Ubb; Ubc | 61  | 54  | 11  | 8   |

|        |                                                                                                                                                                                                   |                                    |      |     |    |    |
|--------|---------------------------------------------------------------------------------------------------------------------------------------------------------------------------------------------------|------------------------------------|------|-----|----|----|
| Q61696 | Heat shock 70 kDa protein 1A (Heat shock 70 kDa protein 3) (HSP70.3) (Hsp68)                                                                                                                      | Hspa1a (Hsp70-3) (Hsp70A1)         | 266  | 236 | 33 | 24 |
| Q9CR57 | 60S ribosomal protein L14                                                                                                                                                                         | Rpl14                              | 508  | 391 | 33 | 24 |
| Q61699 | Heat shock protein 105 kDa (Heat shock-related 100 kDa protein E7I) (HSP-E7I) (Heat shock 110 kDa protein) (42 degrees C-HSP)                                                                     | Hsph1 (Hsp105) (Hsp110) (Kiaa0201) | 46   | 48  | 18 | 13 |
| P27659 | 60S ribosomal protein L3 (J1 protein)                                                                                                                                                             | Rpl3                               | 192  | 75  | 25 | 18 |
| Q99LG2 | Transportin-2 (Karyopherin beta-2b)                                                                                                                                                               | Tnpo2                              | 42   | 32  | 7  | 5  |
| Q60673 | Receptor-type tyrosine-protein phosphatase-like N (R-PTP-N) (PTP IA-2)                                                                                                                            | Ptprn (Ptp35)                      | 30   | 18  | 14 | 10 |
| P14148 | 60S ribosomal protein L7                                                                                                                                                                          | Rpl7                               | 145  | 52  | 14 | 10 |
| P14869 | 60S acidic ribosomal protein P0 (L10E)                                                                                                                                                            | Rplp0 (Arbp)                       | 115  | 334 | 28 | 20 |
| Q60692 | Proteasome subunit beta type-6 (EC 3.4.25.1) (Proteasome delta chain) (Macropain delta chain) (Multicatalytic endopeptidase complex delta chain) (Proteasome subunit Y)                           | Psmb6 (Lmp19)                      | 33   | 89  | 17 | 12 |
| P51410 | 60S ribosomal protein L9                                                                                                                                                                          | Rpl9                               | 187  | 212 | 17 | 12 |
| Q8BMJ2 | Leucyl-tRNA synthetase, cytoplasmic (EC 6.1.1.4) (Leucine--tRNA ligase) (LeuRS)                                                                                                                   | Lars                               | 52   | 45  | 47 | 33 |
| Q7TQI3 | Ubiquitin thioesterase OTUB1 (EC 3.1.2.-) (Otubain-1) (OTU domain-containing ubiquitin aldehyde-binding protein 1) (Ubiquitin-specific-processing protease OTUB1) (Deubiquitinating enzyme OTUB1) | Otub1                              | 152  | 109 | 10 | 7  |
| Q91YJ5 | Translation initiation factor IF-2, mitochondrial (IF-2Mt) (IF2(mt)) (IF-2(Mt))                                                                                                                   | Mtif2                              | 29   | 23  | 13 | 9  |
| Q9CWF2 | Tubulin beta-2B chain                                                                                                                                                                             | Tubb2b                             | 1435 | 825 | 86 | 59 |
| P99024 | Tubulin beta-5 chain                                                                                                                                                                              | Tubb5                              | 1377 | 976 | 88 | 60 |
| Q80TP3 | E3 ubiquitin-protein ligase UBR5 (EC 6.3.2.-) (E3 ubiquitin-protein ligase, HECT domain-containing 1) (Hyperplastic discs protein homolog)                                                        | Ubr5 (Edd) (Edd1) (Kiaa0896)       | 27   | 17  | 43 | 29 |

|        |                                                                                                                                                                                                                               |                           |      |     |    |    |
|--------|-------------------------------------------------------------------------------------------------------------------------------------------------------------------------------------------------------------------------------|---------------------------|------|-----|----|----|
| Q8C9S8 | Cysteine protease ATG4A (EC 3.4.22.-) (Autophagy-related protein 4 homolog A) (Autophagin-2) (Autophagy-related cysteine endopeptidase 2) (AUT-like 2 cysteine endopeptidase)                                                 | Atg4a (Apg4a) (Autl2)     | 26   | 21  | 6  | 4  |
| Q8K4L3 | Supervillin (Archvillin) (p205/p250)                                                                                                                                                                                          | Svil                      | 25   | 22  | 18 | 12 |
| P68372 | Tubulin beta-2C chain                                                                                                                                                                                                         | Tubb2c                    | 1300 | 891 | 78 | 51 |
| P42932 | T-complex protein 1 subunit theta (TCP-1-theta) (CCT-theta)                                                                                                                                                                   | Cct8 (Cctq)               | 197  | 57  | 23 | 15 |
| O70435 | Proteasome subunit alpha type-3 (EC 3.4.25.1) (Proteasome component C8) (Macropain subunit C8) (Multicatalytic endopeptidase complex subunit C8) (Proteasome subunit K)                                                       | Psma3                     | 95   | 76  | 14 | 9  |
| Q9CXW4 | 60S ribosomal protein L11                                                                                                                                                                                                     | Rpl11                     | 72   | 79  | 11 | 7  |
| Q7TMM9 | Tubulin beta-2A chain                                                                                                                                                                                                         | Tubb2a (Tubb2)            | 1422 | 775 | 83 | 52 |
| Q80U87 | Ubiquitin carboxyl-terminal hydrolase 8 (EC 3.1.2.15) (Ubiquitin thioesterase 8) (Ubiquitin-specific-processing protease 8) (Deubiquitinating enzyme 8) (mUBPy)                                                               | Usp8 (Kiaa0055) (UbpY)    | 29   | 23  | 24 | 15 |
| P62717 | 60S ribosomal protein L18a                                                                                                                                                                                                    | Rpl18a                    | 242  | 62  | 21 | 13 |
| P17156 | Heat shock-related 70 kDa protein 2 (Heat shock protein 70.2)                                                                                                                                                                 | Hspa2 (Hcp70.2) (Hsp70-2) | 964  | 544 | 60 | 37 |
| P84099 | 60S ribosomal protein L19                                                                                                                                                                                                     | Rpl19                     | 39   | 47  | 13 | 8  |
| P62301 | 40S ribosomal protein S13                                                                                                                                                                                                     | Rps13                     | 77   | 100 | 23 | 14 |
| Q9D1R9 | 60S ribosomal protein L34                                                                                                                                                                                                     | Rpl34                     | 34   | 32  | 10 | 6  |
| Q9EQZ6 | Rap guanine nucleotide exchange factor 4 (cAMP-regulated guanine nucleotide exchange factor II) (cAMP-GEFII) (Exchange factor directly activated by cAMP 2) (Epac 2) (cAMP-dependent Rap1 guanine-nucleotide exchange factor) | Rapgef4 (Cgef2) (Epac2)   | 47   | 23  | 20 | 12 |

|        |                                                                                                                                                                                                  |                             |      |     |     |    |
|--------|--------------------------------------------------------------------------------------------------------------------------------------------------------------------------------------------------|-----------------------------|------|-----|-----|----|
| Q8R4K8 | Pappalysin-1 (EC 3.4.24.79) (Pregnancy-associated plasma protein A) (PAPP-A) (Insulin-like growth factor-dependent IGF-binding protein 4 protease) (IGF-dependent IGFBP-4 protease) (IGFBP-4ase) | Pappa                       | 41   | 43  | 25  | 15 |
| Q6NZJ6 | Eukaryotic translation initiation factor 4 gamma 1 (eIF-4-gamma 1) (eIF-4G 1) (eIF-4G1)                                                                                                          | Eif4g1                      | 47   | 113 | 30  | 18 |
| P63038 | 60 kDa heat shock protein, mitochondrial (Heat shock protein 60) (HSP-60) (Hsp60) (60 kDa chaperonin) (Chaperonin 60) (CPN60) (Mitochondrial matrix protein P1) (HSP-65)                         | Hspd1 (Hsp60)               | 15   | 32  | 22  | 13 |
| P80317 | T-complex protein 1 subunit zeta (TCP-1-zeta) (CCT-zeta) (CCT-zeta-1)                                                                                                                            | Cct6a (Cct6) (Cctz) (Cctz1) | 160  | 52  | 22  | 13 |
| P10630 | Eukaryotic initiation factor 4A-II (eIF-4A-II) (eIF4A-II) (EC 3.6.1.-) (ATP-dependent RNA helicase eIF4A-2)                                                                                      | Eif4a2 (Ddx2b)              | 194  | 78  | 17  | 10 |
| P63017 | Heat shock cognate 71 kDa protein (Heat shock 70 kDa protein 8)                                                                                                                                  | Hspa8 (Hsc70) (Hsc73)       | 1719 | 959 | 119 | 70 |
| P05532 | Mast/stem cell growth factor receptor (SCFR) (EC 2.7.10.1) (Proto-oncogene tyrosine-protein kinase Kit) (c-kit) (CD antigen CD117)                                                               | Kit (Sl)                    | 16   | 35  | 12  | 7  |
| P62900 | 60S ribosomal protein L31                                                                                                                                                                        | Rpl31                       | 124  | 62  | 12  | 7  |
| Q9JI78 | Peptide-N(4)-(N-acetyl-beta-glucosaminyl)asparagine amidase (PNGase) (mPNGase) (EC 3.5.1.52) (Peptide:N-glycanase) (N-glycanase 1)                                                               | Ngly1                       | 29   | 32  | 19  | 11 |
| P41105 | 60S ribosomal protein L28                                                                                                                                                                        | Rpl28                       | 49   | 41  | 19  | 11 |
| Q9CZX8 | 40S ribosomal protein S19                                                                                                                                                                        | Rps19                       | 206  | 146 | 19  | 11 |
| P47963 | 60S ribosomal protein L13 (A52)                                                                                                                                                                  | Rpl13                       | 744  | 379 | 47  | 27 |
| P47757 | F-actin-capping protein subunit beta (CapZ beta)                                                                                                                                                 | Capzb (Cappb1)              | 107  | 68  | 7   | 4  |

|                               |        |                                                                                                                                                  |                                |     |     |    |    |
|-------------------------------|--------|--------------------------------------------------------------------------------------------------------------------------------------------------|--------------------------------|-----|-----|----|----|
|                               | P26043 | Radixin (ESP10)                                                                                                                                  | Rdx                            | 127 | 106 | 23 | 13 |
|                               | P49722 | Proteasome subunit alpha type-2 (EC 3.4.25.1) (Proteasome component C3) (Macropain subunit C3) (Multicatalytic endopeptidase complex subunit C3) | Psma2 (Lmpc3)                  | 188 | 103 | 16 | 9  |
|                               | P97461 | 40S ribosomal protein S5                                                                                                                         | Rps5                           | 89  | 33  | 32 | 18 |
|                               | Q8K219 | F-box only protein 18 (EC 3.6.1.-) (F-box DNA helicase 1)                                                                                        | Fbxo18 (Fbh1) (Fbx18)          | 30  | 23  | 9  | 5  |
|                               | P63073 | Eukaryotic translation initiation factor 4E (eIF-4E) (eIF4E) (mRNA cap-binding protein) (eIF-4F 25 kDa subunit)                                  | Eif4e                          | 110 | 25  | 9  | 5  |
|                               | Q9D6F9 | Tubulin beta-4 chain                                                                                                                             | Tubb4                          | 888 | 493 | 58 | 31 |
|                               | Q61390 | T-complex protein 1 subunit zeta-2 (TCP-1-zeta-2) (CCT-zeta-2) (Cctz-2)                                                                          | Cct6b                          | 55  | 52  | 15 | 8  |
|                               | P11103 | Poly [ADP-ribose] polymerase 1 (PARP-1) (EC 2.4.2.30) (ADPRT) (NAD(+) ADP-ribosyltransferase 1) (Poly[ADP-ribose] synthetase 1) (msPARP)         | Parp1 (Adprp) (Adprt) (Adprt1) | 21  | 26  | 17 | 9  |
|                               | Q922F4 | Tubulin beta-6 chain                                                                                                                             | Tubb6                          | 583 | 382 | 40 | 21 |
|                               | P97351 | 40S ribosomal protein S3a                                                                                                                        | Rps3a                          | 899 | 392 | 50 | 26 |
|                               | Q9ERD7 | Tubulin beta-3 chain                                                                                                                             | Tubb3                          | 780 | 383 | 52 | 27 |
|                               | Q80UE6 | Serine/threonine-protein kinase WNK4 (EC 2.7.11.1) (Protein kinase with no lysine 4) (Protein kinase, lysine-deficient 4)                        | Wnk4 (Prkwk4)                  | 23  | 33  | 29 | 15 |
| cellular biosynthetic process | P06745 | Glucose-6-phosphate isomerase (GPI) (EC 5.3.1.9) (Phosphoglucose isomerase) (PGI) (Phosphohexose isomerase) (PHI) (Neuroleukin) (NLK)            | Gpi (Gpi1)                     | 39  | 107 | 12 | 22 |
|                               | Q64674 | Spermidine synthase (SPDSY) (EC 2.5.1.16) (Putrescine aminopropyltransferase)                                                                    | Srm                            | 55  | 29  | 4  | 7  |

|        |                                                                                                                                                                                     |                      |     |     |    |    |
|--------|-------------------------------------------------------------------------------------------------------------------------------------------------------------------------------------|----------------------|-----|-----|----|----|
| Q9D009 | Putative octanoyltransferase, mitochondrial (EC 2.3.1.181) (Octanoyl-[acyl-carrier-protein]-protein N-octanoyltransferase) (Lipoyl/octanoyl transferase) (Lipoate-protein ligase B) |                      | 38  | 42  | 11 | 19 |
| Q8R1S0 | Ubiquinone biosynthesis monooxygenase COQ6 (EC 1.14.13.-)                                                                                                                           | Coq6                 | 42  | 92  | 10 | 17 |
| P57776 | Elongation factor 1-delta (EF-1-delta)                                                                                                                                              | Eef1d                | 109 | 35  | 3  | 5  |
| P35980 | 60S ribosomal protein L18                                                                                                                                                           | Rpl18                | 32  | 22  | 51 | 85 |
| P15532 | Nucleoside diphosphate kinase A (NDP kinase A) (NDK A) (EC 2.7.4.6) (Tumor metastatic process-associated protein) (Metastasis inhibition factor NM23) (NDPK-A) (nm23-M1)            | Nme1 (Nm23)          | 150 | 261 | 8  | 13 |
| Q6ZWX6 | Eukaryotic translation initiation factor 2 subunit 1 (Eukaryotic translation initiation factor 2 subunit alpha) (eIF-2-alpha) (EIF-2alpha) (EIF-2A)                                 | Eif2s1 (Eif2a)       | 27  | 177 | 7  | 11 |
| P62082 | 40S ribosomal protein S7                                                                                                                                                            | Rps7                 | 104 | 126 | 9  | 14 |
| P63158 | High mobility group protein B1 (High mobility group protein 1) (HMG-1)                                                                                                              | Hmgb1 (Hmg-1) (Hmg1) | 153 | 405 | 25 | 38 |
| O55142 | 60S ribosomal protein L35a                                                                                                                                                          | Rpl35a               | 24  | 50  | 4  | 6  |
| Q99K85 | Phosphoserine aminotransferase (PSAT) (EC 2.6.1.52) (Phosphohydroxythreonine aminotransferase) (Endometrial progesterone-induced protein) (EPIP)                                    | Psat1 (Psa) (Psat)   | 162 | 541 | 16 | 24 |
| Q8BVI4 | Dihydropteridine reductase (EC 1.5.1.34) (HDHPR) (Quinoid dihydropteridine reductase)                                                                                               | Qdpr (Dhpr)          | 144 | 277 | 7  | 10 |
| O70251 | Elongation factor 1-beta (EF-1-beta)                                                                                                                                                | Eef1b (Eef1b2)       | 39  | 102 | 7  | 10 |
| P17047 | Lysosome-associated membrane glycoprotein 2 (LAMP-2) (Lysosomal membrane glycoprotein type B) (LGP-B) (CD107 antigen-like family member B) (CD antigen CD107b)                      | Lamp2 (Lamp-2)       | 26  | 29  | 8  | 11 |



|        |                                                                                                                                                                          |                            |      |      |     |     |
|--------|--------------------------------------------------------------------------------------------------------------------------------------------------------------------------|----------------------------|------|------|-----|-----|
| Q61753 | D-3-phosphoglycerate dehydrogenase (3-PGDH) (EC 1.1.1.95) (A10)                                                                                                          | Phgdh                      | 105  | 158  | 14  | 18  |
| P28271 | Cytoplasmic aconitate hydratase (Aconitase) (EC 4.2.1.3) (Citrate hydro-lyase) (Iron-responsive element-binding protein 1) (IRE-BP 1) (Iron regulatory protein 1) (IRP1) | Aco1 (Ireb1) (Irebp)       | 77   | 122  | 147 | 184 |
| Q811J3 | Iron-responsive element-binding protein 2 (IRE-BP 2) (Iron regulatory protein 2) (IRP2)                                                                                  | Ireb2 (Irp2)               | 69   | 119  | 142 | 176 |
| Q8BU30 | Isoleucyl-tRNA synthetase, cytoplasmic (EC 6.1.1.5) (Isoleucine--tRNA ligase) (IleRS) (IRS)                                                                              | Iars                       | 85   | 46   | 30  | 37  |
| Q8BGD9 | Eukaryotic translation initiation factor 4B (eIF-4B)                                                                                                                     | Eif4b                      | 238  | 306  | 13  | 16  |
| Q9EQC4 | Elongation of very long chain fatty acids protein 4                                                                                                                      | Elov14                     | 25   | 18   | 5   | 6   |
| O08810 | 116 kDa U5 small nuclear ribonucleoprotein component (U5 snRNP-specific protein, 116 kDa) (U5-116 kDa) (Elongation factor Tu GTP-binding domain-containing protein 2)    | Eftud2 (Snrp116)           | 80   | 68   | 21  | 25  |
| Q8C3X4 | GTP-binding protein GUF1 homolog                                                                                                                                         | Guf1                       | 311  | 506  | 412 | 483 |
| P48754 | Breast cancer type 1 susceptibility protein homolog                                                                                                                      | Brca1                      | 28   | 25   | 26  | 30  |
| P62270 | 40S ribosomal protein S18 (Ke-3) (Ke3)                                                                                                                                   | Rps18                      | 210  | 209  | 15  | 17  |
| P62908 | 40S ribosomal protein S3                                                                                                                                                 | Rps3                       | 778  | 762  | 39  | 44  |
| P19253 | 60S ribosomal protein L13a (Transplantation antigen P198) (Tum-P198 antigen)                                                                                             | Rpl13a (P198) (Tstap198-7) | 27   | 65   | 9   | 10  |
| P62631 | Elongation factor 1-alpha 2 (EF-1-alpha-2) (Elongation factor 1 A-2) (eEF1A-2) (Statin S1)                                                                               | Eef1a2 (Eef1al) (Stn)      | 1275 | 1549 | 258 | 285 |

|        |                                                                                                                                                                                                                                                        |                                             |      |      |     |     |
|--------|--------------------------------------------------------------------------------------------------------------------------------------------------------------------------------------------------------------------------------------------------------|---------------------------------------------|------|------|-----|-----|
| Q9R0Q7 | Prostaglandin E synthase 3 (EC 5.3.99.3)<br>(Cytosolic prostaglandin E2 synthase)<br>(cPGES) (Telomerase-binding protein p23)<br>(Hsp90 co-chaperone) (Progesterone receptor<br>complex p23) (Sid 3177)                                                | Ptges3<br>(Sid3177)<br>(Tebp)               | 124  | 239  | 10  | 11  |
| Q9D8N0 | Elongation factor 1-gamma (EF-1-gamma)<br>(eEF-1B gamma)                                                                                                                                                                                               | Eef1g                                       | 31   | 85   | 11  | 12  |
| Q3THS6 | S-adenosylmethionine synthetase isoform type<br>2 (AdoMet synthetase 2) (EC 2.5.1.6)<br>(Methionine adenosyltransferase 2)                                                                                                                             | Mat2a                                       | 26   | 42   | 11  | 12  |
| Q99KK9 | Probable histidyl-tRNA synthetase,<br>mitochondrial (EC 6.1.1.21) (Histidine--tRNA<br>ligase) (HisRS) (Histidine--tRNA ligase-like)                                                                                                                    | Hars2 (Harsl)                               | 20   | 41   | 22  | 24  |
| P07901 | Heat shock protein HSP 90-alpha (HSP 86)<br>(Tumor-specific transplantation 86 kDa<br>antigen) (TSTA)                                                                                                                                                  | Hsp90aa1<br>(Hsp86)<br>(Hsp86-1)<br>(Hspca) | 1529 | 2324 | 134 | 146 |
| P10126 | Elongation factor 1-alpha 1 (EF-1-alpha-1)<br>(Elongation factor 1 A-1) (eEF1A-1)<br>(Elongation factor Tu) (EF-Tu)                                                                                                                                    | Eef1a1<br>(Eef1a)                           | 2004 | 2344 | 305 | 330 |
| Q9Z104 | SWI/SNF-related matrix-associated actin-<br>dependent regulator of chromatin subfamily E<br>member 1-related (SMARCE1-related protein)<br>(HMG box-containing protein 20B) (Structural<br>DNA-binding protein BRAF35) (BRCA2-<br>associated factor 35) | Hmg20b<br>(Braf35)<br>(Hmgx2)<br>(Smarce1r) | 30   | 20   | 14  | 15  |
| P62281 | 40S ribosomal protein S11                                                                                                                                                                                                                              | Rps11                                       | 166  | 132  | 27  | 28  |
| Q80YV4 | Pantothenate kinase 4 (EC 2.7.1.33)<br>(Pantothenic acid kinase 4) (mPanK4)                                                                                                                                                                            | Pank4                                       | 23   | 28   | 13  | 13  |
| P11499 | Heat shock protein HSP 90-beta (HSP 84)<br>(Tumor-specific transplantation 84 kDa<br>antigen) (TSTA)                                                                                                                                                   | Hsp90ab1<br>(Hsp84)<br>(Hsp84-1)<br>(Hspcb) | 2943 | 3523 | 208 | 205 |
| P58252 | Elongation factor 2 (EF-2)                                                                                                                                                                                                                             | Eef2                                        | 1630 | 1718 | 128 | 126 |

|        |                                                                                                                                                                                                   |                               |     |     |    |    |
|--------|---------------------------------------------------------------------------------------------------------------------------------------------------------------------------------------------------|-------------------------------|-----|-----|----|----|
| P23116 | Eukaryotic translation initiation factor 3 subunit A (eIF3a) (Eukaryotic translation initiation factor 3 subunit 10) (eIF-3-theta) (eIF3 p167) (eIF3 p180) (eIF3 p185) (p162) (Centrosomin)       | Eif3a (Csma) (Eif3) (Eif3s10) | 199 | 166 | 58 | 56 |
| Q8BGQ7 | Alanyl-tRNA synthetase, cytoplasmic (EC 6.1.1.7) (Alanine--tRNA ligase) (AlaRS)                                                                                                                   | Aars                          | 179 | 216 | 23 | 22 |
| Q8R1B4 | Eukaryotic translation initiation factor 3 subunit C (eIF3c) (Eukaryotic translation initiation factor 3 subunit 8) (eIF3 p110)                                                                   | Eif3c (Eif3s8)                | 34  | 63  | 22 | 21 |
| Q9CPR4 | 60S ribosomal protein L17                                                                                                                                                                         | Rpl17                         | 187 | 135 | 15 | 14 |
| Q8CGC7 | Bifunctional aminoacyl-tRNA synthetase [Includes: Glutamyl-tRNA synthetase (EC 6.1.1.17) (Glutamate--tRNA ligase); Prolyl-tRNA synthetase (EC 6.1.1.15) (Proline--tRNA ligase)]                   | Eprs (Qprs)                   | 130 | 102 | 32 | 29 |
| P07310 | Creatine kinase M-type (EC 2.7.3.2) (Creatine kinase M chain) (M-CK)                                                                                                                              | Ckm (Ckmm)                    | 73  | 107 | 31 | 28 |
| Q99104 | Myosin-Va (Dilute myosin heavy chain, non-muscle)                                                                                                                                                 | Myo5a (Dilute)                | 28  | 34  | 35 | 31 |
| Q9Z1Q9 | Valyl-tRNA synthetase (EC 6.1.1.9) (Valine--tRNA ligase) (ValRS) (Protein G7a)                                                                                                                    | Vars (Bat6) (G7a) (Vars2)     | 380 | 302 | 37 | 32 |
| P67984 | 60S ribosomal protein L22 (Heparin-binding protein HBp15)                                                                                                                                         | Rpl22                         | 59  | 48  | 7  | 6  |
| P35979 | 60S ribosomal protein L12                                                                                                                                                                         | Rpl12                         | 208 | 389 | 14 | 12 |
| Q9CZM2 | 60S ribosomal protein L15                                                                                                                                                                         | Rpl15                         | 225 | 107 | 21 | 18 |
| Q6ZWN5 | 40S ribosomal protein S9                                                                                                                                                                          | Rps9                          | 459 | 248 | 47 | 40 |
| P14131 | 40S ribosomal protein S16                                                                                                                                                                         | Rps16                         | 160 | 126 | 19 | 16 |
| P46664 | Adenylosuccinate synthetase isozyme 2 (AMPSase 2) (AdSS 2) (EC 6.3.4.4) (Adenylosuccinate synthetase, non-muscle isozyme) (Adenylosuccinate synthetase, acidic isozyme) (IMP--aspartate ligase 2) | Adss (Adss2)                  | 36  | 66  | 12 | 10 |
| P11531 | Dystrophin                                                                                                                                                                                        | Dmd                           | 25  | 16  | 66 | 55 |

|        |                                                                                                                                                                                                                                                                                                                                                                                                                                                                         |                                       |      |      |     |     |
|--------|-------------------------------------------------------------------------------------------------------------------------------------------------------------------------------------------------------------------------------------------------------------------------------------------------------------------------------------------------------------------------------------------------------------------------------------------------------------------------|---------------------------------------|------|------|-----|-----|
| P19096 | Fatty acid synthase (EC 2.3.1.85) [Includes: [Acyl-carrier-protein] S-acetyltransferase (EC 2.3.1.38); [Acyl-carrier-protein] S-malonyltransferase (EC 2.3.1.39); 3-oxoacyl-[acyl-carrier-protein] synthase (EC 2.3.1.41); 3-oxoacyl-[acyl-carrier-protein] reductase (EC 1.1.1.100); 3-hydroxypalmitoyl-[acyl-carrier-protein] dehydratase (EC 4.2.1.61); Enoyl-[acyl-carrier-protein] reductase (EC 1.3.1.10); Oleoyl [acyl-carrier-protein] hydrolase (EC 3.1.2.14)] | Fasn                                  | 1869 | 1524 | 163 | 135 |
| P14206 | 40S ribosomal protein SA (Laminin receptor 1) (p40) (34/67 kDa laminin receptor) (37 kDa oncofetal antigen) (OFA/iLRP)                                                                                                                                                                                                                                                                                                                                                  | Rpsa (Lamr1) (P40-8)                  | 131  | 112  | 11  | 9   |
| P12970 | 60S ribosomal protein L7a (Surfeit locus protein 3)                                                                                                                                                                                                                                                                                                                                                                                                                     | Rpl7a (Surf-3) (Surf3)                | 111  | 31   | 15  | 12  |
| Q8BP67 | 60S ribosomal protein L24                                                                                                                                                                                                                                                                                                                                                                                                                                               | Rpl24                                 | 354  | 214  | 24  | 19  |
| Q8C196 | Carbamoyl-phosphate synthase [ammonia], mitochondrial (EC 6.3.4.16) (Carbamoyl-phosphate synthetase I) (CPSase I)                                                                                                                                                                                                                                                                                                                                                       | Cps1                                  | 22   | 25   | 19  | 15  |
| P62754 | 40S ribosomal protein S6 (Phosphoprotein NP33)                                                                                                                                                                                                                                                                                                                                                                                                                          | Rps6                                  | 127  | 283  | 19  | 15  |
| Q9QWL7 | Keratin, type I cytoskeletal 17 (Cytokeratin-17) (CK-17) (Keratin-17) (K17)                                                                                                                                                                                                                                                                                                                                                                                             | Krt17 (Krt1-17)                       | 38   | 46   | 14  | 11  |
| P62702 | 40S ribosomal protein S4, X isoform                                                                                                                                                                                                                                                                                                                                                                                                                                     | Rps4x (Rps4)                          | 402  | 304  | 30  | 23  |
| P56480 | ATP synthase subunit beta, mitochondrial (EC 3.6.3.14)                                                                                                                                                                                                                                                                                                                                                                                                                  | Atp5b                                 | 31   | 50   | 8   | 6   |
| Q9DBP5 | UMP-CMP kinase (EC 2.7.4.14) (Cytidylate kinase) (Deoxycytidylate kinase) (Cytidine monophosphate kinase) (Uridine monophosphate kinase) (Uridine monophosphate/cytidine monophosphate kinase) (UMP/CMP kinase) (UMP/CMPK)                                                                                                                                                                                                                                              | Cmpk1 (Cmk) (Cmpk) (Uck) (Umk) (Umpk) | 107  | 93   | 12  | 9   |
| P62751 | 60S ribosomal protein L23a                                                                                                                                                                                                                                                                                                                                                                                                                                              | Rpl23a                                | 75   | 49   | 16  | 12  |
| P58681 | Toll-like receptor 7                                                                                                                                                                                                                                                                                                                                                                                                                                                    | Tlr7                                  | 27   | 33   | 23  | 17  |

|        |                                                                                                                                                                  |                                                   |     |     |    |    |
|--------|------------------------------------------------------------------------------------------------------------------------------------------------------------------|---------------------------------------------------|-----|-----|----|----|
| P62264 | 40S ribosomal protein S14                                                                                                                                        | Rps14                                             | 163 | 166 | 15 | 11 |
| P25444 | 40S ribosomal protein S2 (S4) (LLRep3 protein)                                                                                                                   | Rps2 (Llrep3) (Rps4)                              | 217 | 50  | 26 | 19 |
| P62991 | Ubiquitin                                                                                                                                                        | Rps27a (Uba80) (Ubcep1); Uba52 (Ubcep2); Ubb; Ubc | 61  | 54  | 11 | 8  |
| Q9CR57 | 60S ribosomal protein L14                                                                                                                                        | Rpl14                                             | 508 | 391 | 33 | 24 |
| P27659 | 60S ribosomal protein L3 (J1 protein)                                                                                                                            | Rpl3                                              | 192 | 75  | 25 | 18 |
| Q64237 | Dopamine beta-hydroxylase (EC 1.14.17.1) (Dopamine beta-monooxygenase) [Cleaved into: Soluble dopamine beta-hydroxylase]                                         | Dbh                                               | 44  | 23  | 7  | 5  |
| P14148 | 60S ribosomal protein L7                                                                                                                                         | Rpl7                                              | 145 | 52  | 14 | 10 |
| P14869 | 60S acidic ribosomal protein P0 (L10E)                                                                                                                           | Rplp0 (Arbp)                                      | 115 | 334 | 28 | 20 |
| P17751 | Triosephosphate isomerase (TIM) (EC 5.3.1.1) (Triose-phosphate isomerase)                                                                                        | Tpi1 (Tpi)                                        | 706 | 519 | 35 | 25 |
| P51410 | 60S ribosomal protein L9                                                                                                                                         | Rpl9                                              | 187 | 212 | 17 | 12 |
| Q8BMJ2 | Leucyl-tRNA synthetase, cytoplasmic (EC 6.1.1.4) (Leucine--tRNA ligase) (LeuRS)                                                                                  | Lars                                              | 52  | 45  | 47 | 33 |
| Q91YJ5 | Translation initiation factor IF-2, mitochondrial (IF-2Mt) (IF2(mt)) (IF-2(Mt))                                                                                  | Mtif2                                             | 29  | 23  | 13 | 9  |
| Q99LD8 | N(G),N(G)-dimethylarginine dimethylaminohydrolase 2 (Dimethylarginine dimethylaminohydrolase 2) (DDAH-2) (EC 3.5.3.18) (DDAHII) (Dimethylargininase-2)           | Ddah2                                             | 103 | 92  | 9  | 6  |
| Q9WV07 | Epidermis-type lipoxygenase 3 (e-LOX-3) (EC 1.13.11.-)                                                                                                           | Aloxe3                                            | 25  | 22  | 9  | 6  |
| O88444 | Adenylate cyclase type 1 (EC 4.6.1.1) (Adenylate cyclase type I) (ATP pyrophosphate-lyase 1) (Adenylyl cyclase 1) (Ca(2+)/calmodulin-activated adenylyl cyclase) | Adcy1                                             | 33  | 31  | 26 | 17 |
| Q9CXW4 | 60S ribosomal protein L11                                                                                                                                        | Rpl11                                             | 72  | 79  | 11 | 7  |

|                           |        |                                                                                                                                                                                                                                                                                                        |                           |     |     |    |    |
|---------------------------|--------|--------------------------------------------------------------------------------------------------------------------------------------------------------------------------------------------------------------------------------------------------------------------------------------------------------|---------------------------|-----|-----|----|----|
|                           | Q61983 | Sodium-dependent phosphate transport protein 1 (Sodium/phosphate cotransporter 1) (Na(+)/PI cotransporter 1) (Solute carrier family 17 member 1) (Renal sodium-dependent phosphate transport protein 1) (Renal sodium-phosphate transport protein 1) (Renal Na(+)-dependent phosphate cotransporter 1) | Slc17a1 (Npt1)            | 31  | 33  | 8  | 5  |
|                           | P62717 | 60S ribosomal protein L18a                                                                                                                                                                                                                                                                             | Rpl18a                    | 242 | 62  | 21 | 13 |
|                           | P84099 | 60S ribosomal protein L19                                                                                                                                                                                                                                                                              | Rpl19                     | 39  | 47  | 13 | 8  |
|                           | P62301 | 40S ribosomal protein S13                                                                                                                                                                                                                                                                              | Rps13                     | 77  | 100 | 23 | 14 |
|                           | Q9D1R9 | 60S ribosomal protein L34                                                                                                                                                                                                                                                                              | Rpl34                     | 34  | 32  | 10 | 6  |
|                           | Q6NZJ6 | Eukaryotic translation initiation factor 4 gamma 1 (eIF-4-gamma 1) (eIF-4G 1) (eIF-4G1)                                                                                                                                                                                                                | Eif4g1                    | 47  | 113 | 30 | 18 |
|                           | P10630 | Eukaryotic initiation factor 4A-II (eIF-4A-II) (eIF4A-II) (EC 3.6.1.-) (ATP-dependent RNA helicase eIF4A-2)                                                                                                                                                                                            | Eif4a2 (Ddx2b)            | 194 | 78  | 17 | 10 |
|                           | P62900 | 60S ribosomal protein L31                                                                                                                                                                                                                                                                              | Rpl31                     | 124 | 62  | 12 | 7  |
|                           | P41105 | 60S ribosomal protein L28                                                                                                                                                                                                                                                                              | Rpl28                     | 49  | 41  | 19 | 11 |
|                           | Q9CZX8 | 40S ribosomal protein S19                                                                                                                                                                                                                                                                              | Rps19                     | 206 | 146 | 19 | 11 |
|                           | P47963 | 60S ribosomal protein L13 (A52)                                                                                                                                                                                                                                                                        | Rpl13                     | 744 | 379 | 47 | 27 |
|                           | P97461 | 40S ribosomal protein S5                                                                                                                                                                                                                                                                               | Rps5                      | 89  | 33  | 32 | 18 |
|                           | P63073 | Eukaryotic translation initiation factor 4E (eIF-4E) (eIF4E) (mRNA cap-binding protein) (eIF-4F 25 kDa subunit)                                                                                                                                                                                        | Eif4e                     | 110 | 25  | 9  | 5  |
|                           | Q64105 | Sepiapterin reductase (SPR) (EC 1.1.1.153)                                                                                                                                                                                                                                                             | Spr                       | 43  | 27  | 9  | 5  |
|                           | P97351 | 40S ribosomal protein S3a                                                                                                                                                                                                                                                                              | Rps3a                     | 899 | 392 | 50 | 26 |
| primary metabolic process | Q3TCT4 | Ectonucleoside triphosphate diphosphohydrolase 7 (NTPDase 7) (EC 3.6.1.-) (Lysosomal apyrase-like protein 1)                                                                                                                                                                                           | Entpd7 (Kiaa4066) (Lalp1) | 16  | 33  | 42 | 80 |
|                           | P97311 | DNA replication licensing factor MCM6 (Mis5 homolog)                                                                                                                                                                                                                                                   | Mcm6 (Mcmd6) (Mis5)       | 110 | 395 | 20 | 38 |

|        |                                                                                                                                                                                     |                |     |      |    |     |
|--------|-------------------------------------------------------------------------------------------------------------------------------------------------------------------------------------|----------------|-----|------|----|-----|
| Q9CXW3 | Calcyclin-binding protein (CacyBP) (Siah-interacting protein)                                                                                                                       | Cacybp (Sip)   | 57  | 39   | 7  | 13  |
| P06745 | Glucose-6-phosphate isomerase (GPI) (EC 5.3.1.9) (Phosphoglucose isomerase) (PGI) (Phosphohexose isomerase) (PHI) (Neuroleukin) (NLK)                                               | Gpi (Gpi1)     | 39  | 107  | 12 | 22  |
| Q7TSG3 | F-box only protein 5 (Early mitotic inhibitor 1)                                                                                                                                    | Fbxo5 (Emi1)   | 15  | 27   | 5  | 9   |
| Q8BYC6 | Serine/threonine-protein kinase TAO3 (EC 2.7.11.1) (Thousand and one amino acid protein 3)                                                                                          | Taok3          | 32  | 38   | 9  | 16  |
| P62962 | Profilin-1 (Profilin I)                                                                                                                                                             | Pfn1           | 30  | 93   | 4  | 7   |
| Q64674 | Spermidine synthase (SPDSY) (EC 2.5.1.16) (Putrescine aminopropyltransferase)                                                                                                       | Srm            | 55  | 29   | 4  | 7   |
| P18760 | Cofilin-1 (Cofilin, non-muscle isoform)                                                                                                                                             | Cfl1           | 959 | 2552 | 70 | 122 |
| P17742 | Peptidyl-prolyl cis-trans isomerase A (PPIase A) (Rotamase A) (EC 5.2.1.8) (Cyclophilin A) (Cyclosporin A-binding protein) (SP18)                                                   | Ppia           | 855 | 1549 | 38 | 66  |
| Q9Z1R2 | Large proline-rich protein BAT3 (HLA-B-associated transcript 3)                                                                                                                     | Bat3           | 80  | 49   | 15 | 26  |
| Q9R117 | Non-receptor tyrosine-protein kinase TYK2 (EC 2.7.10.2)                                                                                                                             | Tyk2           | 27  | 30   | 15 | 26  |
| Q9D009 | Putative octanoyltransferase, mitochondrial (EC 2.3.1.181) (Octanoyl-[acyl-carrier-protein]-protein N-octanoyltransferase) (Lipoyl/octanoyl transferase) (Lipoate-protein ligase B) |                | 38  | 42   | 11 | 19  |
| Q9Z129 | ATP-dependent DNA helicase Q1 (EC 3.6.1.-) (DNA-dependent ATPase Q1)                                                                                                                | Recql (Recql1) | 17  | 27   | 13 | 22  |
| Q9ERK4 | Exportin-2 (Exp2) (Importin-alpha re-exporter) (Chromosome segregation 1-like protein)                                                                                              | Cse1l (Xpo2)   | 42  | 153  | 26 | 44  |

|        |                                                                                                                                                                                                                                          |                                                                                                                                                                               |      |      |     |     |
|--------|------------------------------------------------------------------------------------------------------------------------------------------------------------------------------------------------------------------------------------------|-------------------------------------------------------------------------------------------------------------------------------------------------------------------------------|------|------|-----|-----|
| P52480 | Pyruvate kinase isozymes M1/M2 (EC 2.7.1.40) (Pyruvate kinase muscle isozyme)                                                                                                                                                            | Pkm2 (Pk3) (Pykm)                                                                                                                                                             | 1954 | 3481 | 138 | 233 |
| Q8CGP2 | Histone H2B type 1-P                                                                                                                                                                                                                     | Hist1h2bp                                                                                                                                                                     | 436  | 999  | 46  | 77  |
| P57776 | Elongation factor 1-delta (EF-1-delta)                                                                                                                                                                                                   | Eef1d                                                                                                                                                                         | 109  | 35   | 3   | 5   |
| Q9WTL7 | Acyl-protein thioesterase 2 (EC 3.1.2.-) (Lysophospholipase II) (Lysophospholipase 2) (mLyso II)                                                                                                                                         | Lypla2                                                                                                                                                                        | 23   | 49   | 3   | 5   |
| P62960 | Nuclease-sensitive element-binding protein 1 (Y-box-binding protein 1) (Y-box transcription factor) (YB-1) (CCAAT-binding transcription factor I subunit A) (CBF-A) (Enhancer factor I subunit A) (EFI-A) (DNA-binding protein B) (DBPB) | Ybx1 (Msy-1) (Msy1) (Nsep1) (Yb1)                                                                                                                                             | 56   | 126  | 6   | 10  |
| P35980 | 60S ribosomal protein L18                                                                                                                                                                                                                | Rpl18                                                                                                                                                                         | 32   | 22   | 51  | 85  |
| P62806 | Histone H4                                                                                                                                                                                                                               | Hist1h4a;<br>Hist1h4b (H4-53); Hist1h4c (H4-12);<br>Hist1h4d;<br>Hist1h4f;<br>Hist1h4h;<br>Hist1h4i;<br>Hist1h4j;<br>Hist1h4k;<br>Hist1h4m;<br>Hist2h4a (Hist2h4);<br>Hist4h4 | 815  | 1617 | 47  | 78  |
| Q64475 | Histone H2B type 1-B (h2B-143)                                                                                                                                                                                                           | Hist1h2bb                                                                                                                                                                     | 436  | 999  | 46  | 75  |
| P15532 | Nucleoside diphosphate kinase A (NDP kinase A) (NDK A) (EC 2.7.4.6) (Tumor metastatic process-associated protein) (Metastasis inhibition factor NM23) (NDPK-A) (nm23-M1)                                                                 | Nme1 (Nm23)                                                                                                                                                                   | 150  | 261  | 8   | 13  |



|        |                                                                                                                                                     |                              |     |     |    |    |
|--------|-----------------------------------------------------------------------------------------------------------------------------------------------------|------------------------------|-----|-----|----|----|
| Q8BHG1 | Nardilysin (EC 3.4.24.61) (N-arginine dibasic convertase) (NRD convertase) (NRD-C)                                                                  | Nrd1                         | 53  | 54  | 13 | 21 |
| Q6ZWX6 | Eukaryotic translation initiation factor 2 subunit 1 (Eukaryotic translation initiation factor 2 subunit alpha) (eIF-2-alpha) (EIF-2alpha) (EIF-2A) | Eif2s1 (Eif2a)               | 27  | 177 | 7  | 11 |
| Q80Y17 | Lethal(2) giant larvae protein homolog 1 (LLGL) (Mlgl) (Mgl-1)                                                                                      | Llgl1 (Llglh)                | 30  | 29  | 7  | 11 |
| Q61990 | Poly(rC)-binding protein 2 (Alpha-CP2) (Putative heterogeneous nuclear ribonucleoprotein X) (hnRNP X) (CTBP) (CBP)                                  | Pcbp2 (Cbp) (HnrnpX) (Hnrpx) | 29  | 194 | 7  | 11 |
| P63001 | Ras-related C3 botulinum toxin substrate 1 (p21-Rac1)                                                                                               | Rac1                         | 31  | 99  | 7  | 11 |
| P62082 | 40S ribosomal protein S7                                                                                                                            | Rps7                         | 104 | 126 | 9  | 14 |
| Q9Z1S0 | Mitotic checkpoint serine/threonine-protein kinase BUB1 beta (EC 2.7.11.1) (MAD3/BUB1-related protein kinase) (Mitotic checkpoint kinase MAD3L)     | Bub1b (Mad3l)                | 20  | 41  | 15 | 23 |
| P63158 | High mobility group protein B1 (High mobility group protein 1) (HMG-1)                                                                              | Hmgb1 (Hmg-1) (Hmg1)         | 153 | 405 | 25 | 38 |
| Q8K386 | Ras-related protein Rab-15                                                                                                                          | Rab15                        | 44  | 74  | 4  | 6  |
| O55142 | 60S ribosomal protein L35a                                                                                                                          | Rpl35a                       | 24  | 50  | 4  | 6  |
| P50247 | Adenosylhomocysteinase (AdoHcyase) (EC 3.3.1.1) (S-adenosyl-L-homocysteine hydrolase) (Liver copper-binding protein) (CUBP)                         | Ahcy                         | 90  | 106 | 10 | 15 |
| Q99K85 | Phosphoserine aminotransferase (PSAT) (EC 2.6.1.52) (Phosphohydroxythreonine aminotransferase) (Endometrial progesterone-induced protein) (EPIP)    | Psat1 (Psa) (Psat)           | 162 | 541 | 16 | 24 |
| P83741 | Serine/threonine-protein kinase WNK1 (EC 2.7.11.1) (Protein kinase with no lysine 1) (Protein kinase, lysine-deficient 1)                           | Wnk1 (Prkwk1)                | 56  | 36  | 18 | 27 |

|        |                                                                                                                                                                    |                                  |     |     |    |    |
|--------|--------------------------------------------------------------------------------------------------------------------------------------------------------------------|----------------------------------|-----|-----|----|----|
| P53657 | Pyruvate kinase isozymes R/L (EC 2.7.1.40) (L PK)                                                                                                                  | Pklr                             | 144 | 270 | 26 | 38 |
| P97868 | Retinoblastoma-binding protein 6 (p53-associated cellular protein of testis) (Proliferation potential-related protein) (Protein P2P-R)                             | Rbbp6 (P2pr) (Pact)              | 21  | 29  | 24 | 35 |
| Q3THW5 | Histone H2A.V (H2A.F/Z)                                                                                                                                            | H2afv (H2av)                     | 297 | 426 | 11 | 16 |
| P99026 | Proteasome subunit beta type-4 (Proteasome beta chain) (EC 3.4.25.1) (Macropain beta chain) (Multicatalytic endopeptidase complex beta chain) (Proteasome chain 3) | Psmb4 (Lmp3)                     | 93  | 289 | 11 | 16 |
| Q9QZ39 | Alpha-N-acetylgalactosaminide alpha-2,6-sialyltransferase 1 (EC 2.4.99.3) (GalNAc alpha-2,6-sialyltransferase I) (ST6GalNAc I) (Sialyltransferase 7A)              | St6galnac1 (Siat7a)              | 27  | 18  | 11 | 16 |
| P60335 | Poly(rC)-binding protein 1 (Alpha-CP1) (hnRNP-E1)                                                                                                                  | Pcbp1                            | 56  | 350 | 9  | 13 |
| P35761 | Dual specificity protein kinase TTK (ESK) (PYT) (EC 2.7.12.1)                                                                                                      | Ttk (Esk)                        | 14  | 34  | 9  | 13 |
| O70251 | Elongation factor 1-beta (EF-1-beta)                                                                                                                               | Eef1b (Eef1b2)                   | 39  | 102 | 7  | 10 |
| Q00342 | FL cytokine receptor (EC 2.7.10.1) (Tyrosine-protein kinase receptor flk-2) (Fetal liver kinase 2) (Tyrosine-protein kinase FLT3) (CD antigen CD135)               | Flt3 (Flk-2) (Flt3)              | 17  | 34  | 7  | 10 |
| P12813 | Nuclear receptor subfamily 4 group A member 1 (Orphan nuclear receptor HMR) (Nuclear hormone receptor NUR/77) (N10 nuclear protein)                                | Nr4a1 (Gfrp) (Hmr) (N10) (Nur77) | 61  | 31  | 7  | 10 |
| Q9Z1F9 | SUMO-activating enzyme subunit 2 (EC 6.3.2.-) (Ubiquitin-like 1-activating enzyme E1B) (Anthracycline-associated resistance ARX)                                   | Uba2 (Sae2) (Uble1b)             | 62  | 77  | 10 | 14 |
| P68510 | 14-3-3 protein eta                                                                                                                                                 | Ywhah                            | 707 | 962 | 58 | 80 |

|        |                                                                                                                                                                                                                                                                                        |                                |      |      |    |    |
|--------|----------------------------------------------------------------------------------------------------------------------------------------------------------------------------------------------------------------------------------------------------------------------------------------|--------------------------------|------|------|----|----|
| P70696 | Histone H2B type 1-A (Histone H2B, testis) (Testis-specific histone H2B)                                                                                                                                                                                                               | Hist1h2ba (Th2b)               | 146  | 378  | 37 | 51 |
| P05214 | Tubulin alpha-3 chain (Tubulin alpha-3/alpha-7 chain) (Alpha-tubulin 3/7) (Alpha-tubulin isotype M-alpha-3/7)                                                                                                                                                                          | Tuba3a (Tuba3); Tuba3b (Tuba7) | 1112 | 1288 | 61 | 84 |
| P17047 | Lysosome-associated membrane glycoprotein 2 (LAMP-2) (Lysosomal membrane glycoprotein type B) (LGP-B) (CD107 antigen-like family member B) (CD antigen CD107b)                                                                                                                         | Lamp2 (Lamp-2)                 | 26   | 29   | 8  | 11 |
| P27641 | ATP-dependent DNA helicase 2 subunit 2 (EC 3.6.1.-) (ATP-dependent DNA helicase II 80 kDa subunit) (Ku autoantigen protein p86 homolog) (Ku80) (CTC box-binding factor 85 kDa subunit) (CTCBF) (CTC85) (Nuclear factor IV) (DNA repair protein XRCC5)                                  | Xrcc5 (G22p2)                  | 22   | 29   | 16 | 22 |
| P70338 | Zinc finger protein Gfi-1 (Growth factor independent protein 1)                                                                                                                                                                                                                        | Gfi1 (Gfi-1)                   | 45   | 39   | 17 | 23 |
| Q61789 | Laminin subunit alpha-3 (Nicein subunit alpha)                                                                                                                                                                                                                                         | Lama3                          | 26   | 26   | 37 | 50 |
| Q6P8J2 | Diamine acetyltransferase 2 (EC 2.3.1.57) (Spermidine/spermine N(1)-acetyltransferase 2) (Polyamine N-acetyltransferase 2)                                                                                                                                                             | Sat2 (Ssat2)                   | 33   | 23   | 6  | 8  |
| Q9EPL8 | Importin-7 (Imp7) (Ran-binding protein 7) (RanBP7)                                                                                                                                                                                                                                     | Ipo7 (Ranbp7)                  | 25   | 121  | 9  | 12 |
| Q9WTX2 | Interferon-inducible double stranded RNA-dependent protein kinase activator A (Protein kinase, interferon-inducible double stranded RNA-dependent activator) (Protein activator of the interferon-induced protein kinase) (PKR-associated protein X) (PKR-associating protein X) (RAX) | Prkra (Rax)                    | 28   | 39   | 9  | 12 |

|        |                                                                                                                                                                                                                                |                        |     |     |    |    |
|--------|--------------------------------------------------------------------------------------------------------------------------------------------------------------------------------------------------------------------------------|------------------------|-----|-----|----|----|
| Q9ERU9 | E3 SUMO-protein ligase RanBP2 (Ran-binding protein 2)                                                                                                                                                                          | Ranbp2                 | 56  | 49  | 40 | 53 |
| Q5SXJ3 | Fanconi anemia group J protein homolog (Protein FACJ) (EC 3.6.1.-) (ATP-dependent RNA helicase BRIP1) (BRCA1-interacting protein C-terminal helicase 1) (BRCA1-interacting protein 1) (BRCA1-associated C-terminal helicase 1) | Brip1 (Bach1) (Fancj)  | 25  | 18  | 13 | 17 |
| P70168 | Importin subunit beta-1 (Karyopherin subunit beta-1) (Nuclear factor P97) (Pore targeting complex 97 kDa subunit) (PTAC97) (SCG)                                                                                               | Kpnb1 (Impnb)          | 48  | 17  | 13 | 17 |
| Q9Z277 | Bromodomain adjacent to zinc finger domain protein 1B (Williams-Beuren syndrome chromosomal region 9 protein homolog) (WBRS9)                                                                                                  | Baz1b (Wbscr9)         | 43  | 17  | 26 | 34 |
| Q61846 | Maternal embryonic leucine zipper kinase (EC 2.7.11.1) (Protein kinase PK38) (mPK38)                                                                                                                                           | Melk (Kiaa0175) (Pk38) | 28  | 32  | 10 | 13 |
| P47753 | F-actin-capping protein subunit alpha-1 (CapZ alpha-1)                                                                                                                                                                         | Capza1 (Cappa1)        | 60  | 33  | 7  | 9  |
| P63163 | Small nuclear ribonucleoprotein-associated protein N (snRNP-N) (Sm protein N) (Sm-N) (SmN) (Sm-D) (Tissue-specific-splicing protein)                                                                                           | Snrpn (Smn)            | 38  | 17  | 7  | 9  |
| Q7TQ07 | DNA polymerase nu (EC 2.7.7.7)                                                                                                                                                                                                 | Poln                   | 20  | 39  | 14 | 18 |
| Q61753 | D-3-phosphoglycerate dehydrogenase (3-PGDH) (EC 1.1.1.95) (A10)                                                                                                                                                                | Phgdh                  | 105 | 158 | 14 | 18 |
| P05064 | Fructose-bisphosphate aldolase A (EC 4.1.2.13) (Muscle-type aldolase) (Aldolase 1)                                                                                                                                             | Aldoa (Aldo1)          | 211 | 567 | 36 | 46 |
| Q07133 | Histone H1t (Testicular H1 histone)                                                                                                                                                                                            | Hist1h1t (H1ft) (H1t)  | 46  | 72  | 54 | 69 |
| Q923B1 | Lariat debranching enzyme (EC 3.1.-.-)                                                                                                                                                                                         | Dbr1                   | 28  | 29  | 15 | 19 |

|        |                                                                                                                                                                          |                                     |     |     |     |     |
|--------|--------------------------------------------------------------------------------------------------------------------------------------------------------------------------|-------------------------------------|-----|-----|-----|-----|
| P27661 | Histone H2A.x (H2a/x)                                                                                                                                                    | H2afx (H2a.x)<br>(H2ax) (Hist5-2ax) | 301 | 426 | 15  | 19  |
| Q62093 | Splicing factor, arginine/serine-rich 2 (Splicing factor SC35) (SC-35) (Splicing component, 35 kDa) (Protein PR264) (Putative myelin regulatory factor 1) (MRF-1)        | Sfrs2 (Pr264)<br>(Sfrs10)           | 184 | 117 | 15  | 19  |
| P28271 | Cytoplasmic aconitate hydratase (Aconitase) (EC 4.2.1.3) (Citrate hydro-lyase) (Iron-responsive element-binding protein 1) (IRE-BP 1) (Iron regulatory protein 1) (IRP1) | Aco1 (Ireb1)<br>(Irebp)             | 77  | 122 | 147 | 184 |
| P61028 | Ras-related protein Rab-8B                                                                                                                                               | Rab8b                               | 17  | 59  | 4   | 5   |
| Q60716 | Prolyl 4-hydroxylase subunit alpha-2 (EC 1.14.11.2) (4-PH alpha-2) (Procollagen-proline,2-oxoglutarate-4-dioxygenase subunit alpha-2)                                    | P4ha2                               | 22  | 27  | 8   | 10  |
| P17183 | Gamma-enolase (EC 4.2.1.11) (2-phospho-D-glycerate hydro-lyase) (Neural enolase) (Neuron-specific enolase) (NSE) (Enolase 2)                                             | Eno2 (Eno-2)                        | 228 | 181 | 12  | 15  |
| Q811J3 | Iron-responsive element-binding protein 2 (IRE-BP 2) (Iron regulatory protein 2) (IRP2)                                                                                  | Ireb2 (Irp2)                        | 69  | 119 | 142 | 176 |
| Q61316 | Heat shock 70 kDa protein 4 (Heat shock 70-related protein APG-2)                                                                                                        | Hspa4 (Apg2)<br>(Hsp110)            | 379 | 792 | 42  | 52  |
| Q8BU30 | Isoleucyl-tRNA synthetase, cytoplasmic (EC 6.1.1.5) (Isoleucine--tRNA ligase) (IleRS) (IRS)                                                                              | Iars                                | 85  | 46  | 30  | 37  |
| Q8BGD9 | Eukaryotic translation initiation factor 4B (eIF-4B)                                                                                                                     | Eif4b                               | 238 | 306 | 13  | 16  |

|        |                                                                                                                                                                                                                             |                           |    |     |     |     |
|--------|-----------------------------------------------------------------------------------------------------------------------------------------------------------------------------------------------------------------------------|---------------------------|----|-----|-----|-----|
| Q61466 | SWI/SNF-related matrix-associated actin-dependent regulator of chromatin subfamily D member 1 (SWI/SNF complex 60 kDa subunit) (60 kDa BRG-1/Brm-associated factor subunit A) (BRG1-associated factor 60A) (D15KZ1 protein) | Smarcd1 (Baf60a) (D15Kz1) | 27 | 29  | 13  | 16  |
| P59270 | Galactosylgalactosylxylosylprotein 3-beta-glucuronosyltransferase 2 (EC 2.4.1.135) (Beta-1,3-glucuronyltransferase 2) (UDP-glucuronosyltransferase-S) (Glucuronosyltransferase-S) (GlcAT-S) (GlcAT-D)                       | B3gat2 (Glcats)           | 29 | 16  | 9   | 11  |
| Q8VII8 | Mineralocorticoid receptor (MR) (Nuclear receptor subfamily 3 group C member 2)                                                                                                                                             | Nr3c2 (Mlr)               | 28 | 22  | 18  | 22  |
| Q9R1P0 | Proteasome subunit alpha type-4 (EC 3.4.25.1) (Proteasome component C9) (Macropain subunit C9) (Multicatalytic endopeptidase complex subunit C9) (Proteasome subunit L)                                                     | Psma4                     | 29 | 151 | 14  | 17  |
| Q9CZY3 | Ubiquitin-conjugating enzyme E2 variant 1 (UEV-1) (CROC-1)                                                                                                                                                                  | Ube2v1 (Croc1)            | 83 | 163 | 166 | 201 |
| O08648 | Mitogen-activated protein kinase kinase kinase 4 (EC 2.7.11.25) (MAPK/ERK kinase kinase 4) (MEK kinase 4) (MEKK 4)                                                                                                          | Map3k4 (Mekk4)            | 37 | 16  | 19  | 23  |
| P49025 | Citron Rho-interacting kinase (CRIK) (EC 2.7.11.1) (Rho-interacting, serine/threonine-protein kinase 21)                                                                                                                    | Cit                       | 49 | 67  | 67  | 81  |
| P47754 | F-actin-capping protein subunit alpha-2 (CapZ alpha-2)                                                                                                                                                                      | Capza2 (Cappa2)           | 60 | 33  | 5   | 6   |
| Q9EQC4 | Elongation of very long chain fatty acids protein 4                                                                                                                                                                         | Elovl4                    | 25 | 18  | 5   | 6   |
| O35618 | Protein Mdm4 (p53-binding protein Mdm4) (Mdm2-like p53-binding protein) (Protein Mdmx) (Double minute 4 protein)                                                                                                            | Mdm4 (Mdmx)               | 17 | 29  | 5   | 6   |
| Q6PDM2 | Splicing factor, arginine/serine-rich 1 (ASF/SF2)                                                                                                                                                                           | Sfrs1                     | 24 | 91  | 5   | 6   |

|        |                                                                                                                                                                                                      |                               |     |     |     |     |
|--------|------------------------------------------------------------------------------------------------------------------------------------------------------------------------------------------------------|-------------------------------|-----|-----|-----|-----|
| Q60848 | Lymphocyte-specific helicase (EC 3.6.1.-)<br>(Proliferation associated SNF2-like protein)                                                                                                            | Hells (Lsh)<br>(Pasg)         | 37  | 35  | 10  | 12  |
| P54227 | Stathmin (Phosphoprotein p19) (pp19)<br>(Leukemia-associated phosphoprotein p18)<br>(Oncoprotein 18) (Op18) (pp17) (Prosolin)<br>(Metablastin) (Protein Pr22) (Leukemia-<br>associated gene protein) | Stmn1 (Lag)<br>(Lap18) (Pr22) | 121 | 120 | 10  | 12  |
| Q8BFY9 | Transportin-1 (Importin beta-2) (Karyopherin<br>beta-2)                                                                                                                                              | Tnp01<br>(Kpnb2)              | 54  | 43  | 10  | 12  |
| Q9QUR6 | Prolyl endopeptidase (PE) (EC 3.4.21.26)<br>(Post-proline cleaving enzyme)                                                                                                                           | Prep (Pep)                    | 56  | 20  | 15  | 18  |
| P80315 | T-complex protein 1 subunit delta (TCP-1-<br>delta) (CCT-delta) (A45)                                                                                                                                | Cct4 (Cctd)                   | 61  | 59  | 15  | 18  |
| O08810 | 116 kDa U5 small nuclear ribonucleoprotein<br>component (U5 snRNP-specific protein, 116<br>kDa) (U5-116 kDa) (Elongation factor Tu GTP-<br>binding domain-containing protein 2)                      | Eftud2<br>(Snrp116)           | 80  | 68  | 21  | 25  |
| Q9R0K7 | Plasma membrane calcium-transporting<br>ATPase 2 (PMCA2) (EC 3.6.3.8) (Plasma<br>membrane calcium ATPase isoform 2)<br>(Plasma membrane calcium pump isoform 2)                                      | Atp2b2<br>(Pmca2)             | 32  | 27  | 70  | 83  |
| P54103 | DnaJ homolog subfamily C member 2 (Zuotin-<br>related factor 1) (Mouse Id associate 1)<br>(MIDA1)                                                                                                    | Dnajc2<br>(Mida1) (Zrf1)      | 23  | 27  | 11  | 13  |
| P80313 | T-complex protein 1 subunit eta (TCP-1-eta)<br>(CCT-eta)                                                                                                                                             | Cct7 (Ccth)                   | 49  | 50  | 11  | 13  |
| Q8C3X4 | GTP-binding protein GUF1 homolog                                                                                                                                                                     | Guf1                          | 311 | 506 | 412 | 483 |
| Q61122 | NGFI-A-binding protein 1 (EGR-1-binding<br>protein 1)                                                                                                                                                | Nab1                          | 30  | 25  | 6   | 7   |
| Q6GSS7 | Histone H2A type 2-A (H2A.2) (H2a-614) (H2a-<br>615)                                                                                                                                                 | Hist2h2aa1;<br>Hist2h2aa2     | 505 | 763 | 18  | 21  |
| P49718 | DNA replication licensing factor MCM5<br>(CDC46 homolog) (P1-CDC46)                                                                                                                                  | Mcm5 (Cdc46)<br>(Mcmd5)       | 40  | 20  | 18  | 21  |

|        |                                                                                                                                                                                                                                                                                                                    |                                  |     |     |     |     |
|--------|--------------------------------------------------------------------------------------------------------------------------------------------------------------------------------------------------------------------------------------------------------------------------------------------------------------------|----------------------------------|-----|-----|-----|-----|
| P48754 | Breast cancer type 1 susceptibility protein homolog                                                                                                                                                                                                                                                                | Brca1                            | 28  | 25  | 26  | 30  |
| Q9JKP5 | Muscleblind-like protein 1 (Triplet-expansion RNA-binding protein)                                                                                                                                                                                                                                                 | Mbnl1 (Exp) (Mbnl)               | 45  | 63  | 244 | 281 |
| Q62418 | Drebrin-like protein (SH3 domain-containing protein 7) (Actin-binding protein 1)                                                                                                                                                                                                                                   | Dbnl (Abp1) (Sh3p7)              | 24  | 39  | 7   | 8   |
| Q9QWY8 | 130 kDa phosphatidylinositol 4,5-biphosphate-dependent ARF1 GTPase-activating protein (PIP2-dependent ARF1 GAP) (ADP-ribosylation factor-directed GTPase-activating protein 1) (ARF GTPase-activating protein 1) (Development and differentiation-enhancing factor 1) (Differentiation-enhancing factor 1) (DEF-1) | Ddef1 (Asap1) (Kiaa1249) (Shag1) | 26  | 23  | 14  | 16  |
| Q6A4J8 | Ubiquitin carboxyl-terminal hydrolase 7 (EC 3.1.2.15) (Ubiquitin thioesterase 7) (Ubiquitin-specific-processing protease 7) (Deubiquitinating enzyme 7) (Herpesvirus-associated ubiquitin-specific protease) (mHAUSP)                                                                                              | Usp7 (Hausp)                     | 27  | 18  | 14  | 16  |
| P58660 | Caspase recruitment domain-containing protein 10 (Bcl10-interacting MAGUK protein 1) (Bimp1)                                                                                                                                                                                                                       | Card10 (Bimp1)                   | 33  | 23  | 15  | 17  |
| P97820 | Mitogen-activated protein kinase kinase kinase kinase 4 (EC 2.7.11.1) (MAPK/ERK kinase kinase kinase 4) (MEK kinase kinase 4) (MEKKK 4) (HPK/GCK-like kinase HGK) (Nck-interacting kinase)                                                                                                                         | Map4k4 (Nik)                     | 65  | 54  | 15  | 17  |
| P62270 | 40S ribosomal protein S18 (Ke-3) (Ke3)                                                                                                                                                                                                                                                                             | Rps18                            | 210 | 209 | 15  | 17  |
| P55200 | Histone-lysine N-methyltransferase HRX (EC 2.1.1.43) (Zinc finger protein HRX) (ALL-1)                                                                                                                                                                                                                             | Mll (All1) (Hrx) (Mll1)          | 67  | 26  | 39  | 44  |
| P62908 | 40S ribosomal protein S3                                                                                                                                                                                                                                                                                           | Rps3                             | 778 | 762 | 39  | 44  |



|        |                                                                                                                                                                                                                     |                                   |      |      |     |     |
|--------|---------------------------------------------------------------------------------------------------------------------------------------------------------------------------------------------------------------------|-----------------------------------|------|------|-----|-----|
| Q921M3 | Splicing factor 3B subunit 3 (Spliceosome-associated protein 130) (SAP 130) (Pre-mRNA splicing factor SF3b 130 kDa subunit) (SF3b130)                                                                               | Sf3b3 (Kiaa0017)                  | 16   | 34   | 24  | 27  |
| Q9WUF3 | CASP8-associated protein 2 (FLICE-associated huge protein)                                                                                                                                                          | Casp8ap2 (Flash)                  | 28   | 16   | 26  | 29  |
| Q64467 | Glyceraldehyde-3-phosphate dehydrogenase, testis-specific (EC 1.2.1.12) (Spermatogenic glyceraldehyde-3-phosphate dehydrogenase) (Spermatogenic cell-specific glyceraldehyde 3-phosphate dehydrogenase 2) (GAPDH-2) | Gapdhs (Gapds) (Gapds)            | 75   | 781  | 26  | 29  |
| P41230 | Histone demethylase JARID1C (EC 1.14.11.-) (Jumonji/ARID domain-containing protein 1C) (Protein SmcX) (Protein Xe169)                                                                                               | Jarid1c (Kiaa0234) (Smcx) (Xe169) | 34   | 32   | 26  | 29  |
| P26618 | Alpha-type platelet-derived growth factor receptor (EC 2.7.10.1) (PDGF-R-alpha) (CD140 antigen-like family member A) (CD antigen CD140a)                                                                            | Pdgfra                            | 37   | 73   | 160 | 178 |
| P19253 | 60S ribosomal protein L13a (Transplantation antigen P198) (Tum-P198 antigen)                                                                                                                                        | Rpl13a (P198) (Tstap198-7)        | 27   | 65   | 9   | 10  |
| P62631 | Elongation factor 1-alpha 2 (EF-1-alpha-2) (Elongation factor 1 A-2) (eEF1A-2) (Statin S1)                                                                                                                          | Eef1a2 (Eef1a) (Stn)              | 1275 | 1549 | 258 | 285 |
| Q62446 | FK506-binding protein 3 (EC 5.2.1.8) (Peptidyl-prolyl cis-trans isomerase) (PPIase) (Rotamase) (25 kDa FKBP) (FKBP-25) (Rapamycin-selective 25 kDa immunophilin)                                                    | Fkbp3 (Fkbp25)                    | 31   | 31   | 10  | 11  |

|        |                                                                                                                                                                                                    |                                    |      |      |     |     |
|--------|----------------------------------------------------------------------------------------------------------------------------------------------------------------------------------------------------|------------------------------------|------|------|-----|-----|
| O55234 | Proteasome subunit beta type-5 (EC 3.4.25.1) (Proteasome epsilon chain) (Macropain epsilon chain) (Multicatalytic endopeptidase complex epsilon chain) (Proteasome subunit X) (Proteasome chain 6) | Psmb5                              | 168  | 227  | 10  | 11  |
| Q93092 | Transaldolase (EC 2.2.1.2)                                                                                                                                                                         | Taldo1 (Tal) (Taldo)               | 20   | 93   | 10  | 11  |
| Q9R0Q7 | Prostaglandin E synthase 3 (EC 5.3.99.3) (Cytosolic prostaglandin E2 synthase) (cPGES) (Telomerase-binding protein p23) (Hsp90 co-chaperone) (Progesterone receptor complex p23) (Sid 3177)        | Ptges3 (Sid3177) (Tebp)            | 124  | 239  | 10  | 11  |
| Q9D8N0 | Elongation factor 1-gamma (EF-1-gamma) (eEF-1B gamma)                                                                                                                                              | Eef1g                              | 31   | 85   | 11  | 12  |
| Q8VC12 | Probable urocanate hydratase (Urocanase) (EC 4.2.1.49) (Imidazolonepropionate hydrolase)                                                                                                           | Uroc1                              | 33   | 26   | 11  | 12  |
| P49717 | DNA replication licensing factor MCM4 (CDC21 homolog) (P1-CDC21)                                                                                                                                   | Mcm4 (Cdc21) (Mcmd4)               | 29   | 18   | 11  | 12  |
| Q3THS6 | S-adenosylmethionine synthetase isoform type-2 (AdoMet synthetase 2) (EC 2.5.1.6) (Methionine adenosyltransferase 2)                                                                               | Mat2a                              | 26   | 42   | 11  | 12  |
| Q99KK9 | Probable histidyl-tRNA synthetase, mitochondrial (EC 6.1.1.21) (Histidine--tRNA ligase) (HisRS) (Histidine--tRNA ligase-like)                                                                      | Hars2 (Harsl)                      | 20   | 41   | 22  | 24  |
| P27546 | Microtubule-associated protein 4 (MAP-4)                                                                                                                                                           | Map4 (Mtap4)                       | 94   | 41   | 33  | 36  |
| P07901 | Heat shock protein HSP 90-alpha (HSP 86) (Tumor-specific transplantation 86 kDa antigen) (TSTA)                                                                                                    | Hsp90aa1 (Hsp86) (Hsp86-1) (Hspca) | 1529 | 2324 | 134 | 146 |

|        |                                                                                                                                                                                                                                       |                                    |      |      |     |     |
|--------|---------------------------------------------------------------------------------------------------------------------------------------------------------------------------------------------------------------------------------------|------------------------------------|------|------|-----|-----|
| Q6P9Z1 | SWI/SNF-related matrix-associated actin-dependent regulator of chromatin subfamily D member 3 (60 kDa BRG-1/Brm-associated factor subunit C) (BRG1-associated factor 60C) (mBAF60c)                                                   | Smarcd3 (Baf60c)                   | 29   | 19   | 46  | 50  |
| P70298 | Homeobox protein cut-like 2 (Cut-like 2) (Homeobox protein Cux-2)                                                                                                                                                                     | Cux2 (Cutl2)                       | 30   | 22   | 12  | 13  |
| P38647 | Stress-70 protein, mitochondrial (75 kDa glucose-regulated protein) (GRP 75) (Heat shock 70 kDa protein 9) (Peptide-binding protein 74) (PBP74) (P66 MOT) (Mortalin)                                                                  | Hspa9 (Grp75) (Hsp74) (Hspa9a)     | 33   | 33   | 12  | 13  |
| Q8BKC5 | Importin-5 (Imp5) (Importin subunit beta-3) (Karyopherin beta-3) (Ran-binding protein 5) (RanBP5)                                                                                                                                     | Ipo5 (Kpnb3) (Ranbp5)              | 185  | 91   | 12  | 13  |
| P10126 | Elongation factor 1-alpha 1 (EF-1-alpha-1) (Elongation factor 1 A-1) (eEF1A-1) (Elongation factor Tu) (EF-Tu)                                                                                                                         | Eef1a1 (Eef1a)                     | 2004 | 2344 | 305 | 330 |
| P08113 | Endoplasmic reticulum chaperone (Heat shock protein 90 kDa beta member 1) (94 kDa glucose-regulated protein) (GRP94) (ERP99) (Polymorphic tumor rejection antigen 1) (Tumor rejection antigen gp96)                                   | Hsp90b1 (Tra1) (Tra1)              | 221  | 298  | 25  | 27  |
| Q9Z104 | SWI/SNF-related matrix-associated actin-dependent regulator of chromatin subfamily E member 1-related (SMARCE1-related protein) (HMG box-containing protein 20B) (Structural DNA-binding protein BRAF35) (BRCA2-associated factor 35) | Hmg20b (Braf35) (Hmgx2) (Smarce1r) | 30   | 20   | 14  | 15  |
| P11984 | T-complex protein 1 subunit alpha A (TCP-1-alpha) (CCT-alpha) (Tailless complex polypeptide 1A) (TCP-1-A)                                                                                                                             | Cct1 (Ccta) (Tcp1)                 | 29   | 66   | 14  | 15  |

|        |                                                                                                                                                                                                                                                                                                                                        |                               |      |      |     |     |
|--------|----------------------------------------------------------------------------------------------------------------------------------------------------------------------------------------------------------------------------------------------------------------------------------------------------------------------------------------|-------------------------------|------|------|-----|-----|
| P70398 | Probable ubiquitin carboxyl-terminal hydrolase FAF-X (EC 3.1.2.15) (Ubiquitin thioesterase FAF-X) (Ubiquitin-specific-processing protease FAF-X) (Deubiquitinating enzyme FAF-X) (Fat facets protein-related, X-linked) (Ubiquitin-specific protease 9, X chromosome) (Ubiquitin carboxyl-terminal hydrolase FAM) (Fat facets homolog) | Usp9x (Fafl) (Fam)            | 42   | 28   | 57  | 61  |
| Q8BXX6 | Serine/threonine-protein kinase SMG1 (SMG-1) (EC 2.7.11.1)                                                                                                                                                                                                                                                                             | Smg1 (Kiaa0421)               | 33   | 27   | 30  | 32  |
| P16858 | Glyceraldehyde-3-phosphate dehydrogenase (GAPDH) (EC 1.2.1.12)                                                                                                                                                                                                                                                                         | Gapdh (Gapd)                  | 1514 | 1781 | 84  | 89  |
| Q8VI56 | Low-density lipoprotein receptor-related protein 4 (LDLR dan)                                                                                                                                                                                                                                                                          | Lrp4 (Kiaa0816)               | 77   | 30   | 19  | 20  |
| P16546 | Spectrin alpha chain, brain (Spectrin, non-erythroid alpha chain) (Alpha-II spectrin) (Fodrin alpha chain)                                                                                                                                                                                                                             | Sptan1 (Spna2) (Spta2)        | 68   | 86   | 66  | 69  |
| Q920R0 | Alsin (Amyotrophic lateral sclerosis protein 2 homolog)                                                                                                                                                                                                                                                                                | Als2                          | 74   | 88   | 72  | 75  |
| Q62504 | Msx2-interacting protein (SPEN homolog) (SMART/HDAC1-associated repressor protein)                                                                                                                                                                                                                                                     | Spn (Kiaa0929) (Mint) (Sharp) | 27   | 18   | 72  | 75  |
| O35973 | Period circadian protein homolog 1 (Circadian clock protein PERIOD 1) (Circadian pacemaker protein Rigui) (mPER1)                                                                                                                                                                                                                      | Per1 (Per) (Rigui)            | 29   | 21   | 27  | 28  |
| P62281 | 40S ribosomal protein S11                                                                                                                                                                                                                                                                                                              | Rps11                         | 166  | 132  | 27  | 28  |
| Q9JM05 | E3 SUMO-protein ligase PIAS4 (Protein inhibitor of activated STAT protein 4) (Protein inhibitor of activated STAT protein gamma) (PIAS-gamma) (PIASy)                                                                                                                                                                                  | Pias4 (Piasg)                 | 26   | 29   | 162 | 165 |
| P62141 | Serine/threonine-protein phosphatase PP1-beta catalytic subunit (PP-1B) (EC 3.1.3.16)                                                                                                                                                                                                                                                  | Ppp1cb                        | 177  | 57   | 4   | 4   |

|        |                                                                                                                                                                                                        |                                                |     |     |    |    |
|--------|--------------------------------------------------------------------------------------------------------------------------------------------------------------------------------------------------------|------------------------------------------------|-----|-----|----|----|
| P12367 | cAMP-dependent protein kinase type II-alpha regulatory subunit                                                                                                                                         | Prkar2a                                        | 33  | 23  | 5  | 5  |
| Q3TXZ1 | Zinc finger protein 575                                                                                                                                                                                | Znf575<br>(Zfp575)                             | 30  | 25  | 5  | 5  |
| Q8VCZ3 | THAP domain-containing protein 7                                                                                                                                                                       | Thap7                                          | 26  | 18  | 6  | 6  |
| O88693 | Ceramide glucosyltransferase (EC 2.4.1.80) (Glucosylceramide synthase) (GCS) (UDP-glucose:N-acylsphingosine D-glucosyltransferase) (UDP-glucose ceramide glucosyltransferase) (GLCT-1)                 | Ugcg                                           | 37  | 50  | 7  | 7  |
| Q9R1P1 | Proteasome subunit beta type-3 (EC 3.4.25.1) (Proteasome theta chain) (Proteasome chain 13) (Proteasome component C10-II)                                                                              | Psmb3                                          | 87  | 135 | 7  | 7  |
| P30416 | FK506-binding protein 4 (EC 5.2.1.8) (Peptidyl-prolyl cis-trans isomerase) (PPIase) (Rotamase) (HSP-binding immunophilin) (HBI) (FKBP52 protein) (52 kDa FK506-binding protein) (FKBP59) (p59 protein) | Fkbp4                                          | 40  | 62  | 8  | 8  |
| Q9R190 | Metastasis-associated protein MTA2 (Metastasis-associated 1-like 1)                                                                                                                                    | Mta2 (Mta111)                                  | 27  | 26  | 9  | 9  |
| Q6P5F9 | Exportin-1 (Exp1) (Chromosome region maintenance 1 protein homolog)                                                                                                                                    | Xpo1 (Crm1)                                    | 19  | 43  | 9  | 9  |
| Q9DAI4 | Zinc finger and BTB domain-containing protein 43 (Zinc finger protein 297B)                                                                                                                            | Zbtb43<br>(Kiaa0414)<br>(Zfp297b)<br>(Znf297b) | 23  | 51  | 9  | 9  |
| Q9CQ60 | 6-phosphogluconolactonase (6PGL) (EC 3.1.1.31)                                                                                                                                                         | Pgls                                           | 148 | 41  | 11 | 11 |
| O09061 | Proteasome subunit beta type-1 (EC 3.4.25.1) (Proteasome component C5) (Macropain subunit C5) (Multicatalytic endopeptidase complex subunit C5) (Proteasome gamma chain)                               | Psmb1                                          | 84  | 94  | 11 | 11 |

|        |                                                                                                                                                       |                                       |      |      |     |     |
|--------|-------------------------------------------------------------------------------------------------------------------------------------------------------|---------------------------------------|------|------|-----|-----|
| Q9DB77 | Cytochrome b-c1 complex subunit 2, mitochondrial (Ubiquinol-cytochrome-c reductase complex core protein 2) (Core protein II) (Complex III subunit 2)  | Uqcrc2                                | 29   | 20   | 13  | 13  |
| Q9JIF7 | Coatomer subunit beta (Beta-coat protein) (Beta-COP)                                                                                                  | Copb1 (Copb)                          | 37   | 22   | 15  | 15  |
| P25206 | DNA replication licensing factor MCM3 (DNA polymerase alpha holoenzyme-associated protein P1) (P1-MCM3)                                               | Mcm3 (Mcmd) (Mcmd3)                   | 74   | 185  | 15  | 15  |
| Q01098 | Glutamate [NMDA] receptor subunit epsilon-3 (N-methyl D-aspartate receptor subtype 2C) (NMDAR2C) (NR2C)                                               | Grin2c                                | 18   | 33   | 15  | 15  |
| Q8R4K2 | Interleukin-1 receptor-associated kinase 4 (IRAK-4) (EC 2.7.11.1)                                                                                     | Irak4                                 | 32   | 47   | 22  | 22  |
| P30681 | High mobility group protein B2 (High mobility group protein 2) (HMG-2)                                                                                | Hmgb2 (Hmg2)                          | 94   | 222  | 24  | 24  |
| Q80UK8 | Integrator complex subunit 2 (Int2)                                                                                                                   | Ints2 (Kiaa1287)                      | 16   | 27   | 24  | 24  |
| Q6P8J7 | Creatine kinase, sarcomeric mitochondrial (EC 2.7.3.2) (S-MtCK)                                                                                       | Ckmt2                                 | 50   | 66   | 26  | 26  |
| Q62261 | Spectrin beta chain, brain 1 (Spectrin, non-erythroid beta chain 1) (Beta-II spectrin) (Fodrin beta chain) (Embryonic liver fodrin)                   | Sptbn1 (Elf) (Spnb-2) (Spnb2) (Sptb2) | 56   | 54   | 48  | 48  |
| Q8K4E0 | Alstrom syndrome protein 1 homolog                                                                                                                    | Alms1 (Kiaa0328)                      | 29   | 30   | 86  | 86  |
| P11499 | Heat shock protein HSP 90-beta (HSP 84) (Tumor-specific transplantation 84 kDa antigen) (TSTA)                                                        | Hsp90ab1 (Hsp84) (Hsp84-1) (Hspcb)    | 2943 | 3523 | 208 | 205 |
| P58252 | Elongation factor 2 (EF-2)                                                                                                                            | Eef2                                  | 1630 | 1718 | 128 | 126 |
| Q91YE5 | Bromodomain adjacent to zinc finger domain protein 2A (Transcription termination factor I-interacting protein 5) (TTF-I-interacting protein 5) (Tip5) | Baz2a (Tip5)                          | 36   | 15   | 56  | 55  |

|        |                                                                                                                                                                                                              |                                        |     |     |    |    |
|--------|--------------------------------------------------------------------------------------------------------------------------------------------------------------------------------------------------------------|----------------------------------------|-----|-----|----|----|
| P23116 | Eukaryotic translation initiation factor 3 subunit A (eIF3a) (Eukaryotic translation initiation factor 3 subunit 10) (eIF-3-theta) (eIF3 p167) (eIF3 p180) (eIF3 p185) (p162) (Centrosomin)                  | Eif3a (Csma) (Eif3) (Eif3s10)          | 199 | 166 | 58 | 56 |
| O08638 | Myosin-11 (Myosin heavy chain 11) (Myosin heavy chain, smooth muscle isoform) (SMMHC)                                                                                                                        | Myh11                                  | 211 | 221 | 79 | 76 |
| Q8R4B8 | NACHT, LRR and PYD domains-containing protein 3 (Cold autoinflammatory syndrome 1 protein homolog) (Cryopyrin) (PYRIN-containing APAF1-like protein 1) (Mast cell maturation-associated-inducible protein 1) | Nlrp3 (Cias1) (Mmig1) (Nalp3) (Pypaf1) | 30  | 20  | 24 | 23 |
| P16406 | Glutamyl aminopeptidase (EC 3.4.11.7) (EAP) (Aminopeptidase A) (APA) (BP-1/6C3 antigen) (CD antigen CD249)                                                                                                   | Enpep                                  | 98  | 90  | 48 | 46 |
| Q8BGQ7 | Alanyl-tRNA synthetase, cytoplasmic (EC 6.1.1.7) (Alanine--tRNA ligase) (AlaRS)                                                                                                                              | Aars                                   | 179 | 216 | 23 | 22 |
| Q91V92 | ATP-citrate synthase (EC 2.3.3.8) (ATP-citrate (pro-S)-lyase) (Citrate cleavage enzyme)                                                                                                                      | Acly                                   | 349 | 488 | 45 | 43 |
| Q8R1B4 | Eukaryotic translation initiation factor 3 subunit C (eIF3c) (Eukaryotic translation initiation factor 3 subunit 8) (eIF3 p110)                                                                              | Eif3c (Eif3s8)                         | 34  | 63  | 22 | 21 |
| Q6ZPK0 | PHD finger protein 21A (BRAF35-HDAC complex protein BHC80) (mBHC80) (BHC80a)                                                                                                                                 | Phf21a (Bhc80) (Kiaa1696) (Pftf1)      | 28  | 37  | 20 | 19 |
| P54869 | Hydroxymethylglutaryl-CoA synthase, mitochondrial (HMG-CoA synthase) (EC 2.3.3.10) (3-hydroxy-3-methylglutaryl coenzyme A synthase)                                                                          | Hmgcs2                                 | 26  | 23  | 18 | 17 |
| P03966 | N-myc proto-oncogene protein                                                                                                                                                                                 | Mycn (Nmyc) (Nmyc1)                    | 65  | 46  | 18 | 17 |
| Q8BTI8 | Serine/arginine repetitive matrix protein 2                                                                                                                                                                  | Srrm2 (Kiaa0324)                       | 78  | 70  | 92 | 86 |

|        |                                                                                                                                                                                                                     |                          |     |     |     |     |
|--------|---------------------------------------------------------------------------------------------------------------------------------------------------------------------------------------------------------------------|--------------------------|-----|-----|-----|-----|
| Q9CPR4 | 60S ribosomal protein L17                                                                                                                                                                                           | Rpl17                    | 187 | 135 | 15  | 14  |
| Q7TMY8 | E3 ubiquitin-protein ligase HUWE1 (EC 6.3.2.-) (HECT, UBA and WWE domain-containing protein 1) (Upstream regulatory element-binding protein 1) (URE-binding protein 1) (URE-B1) (E3Histone)                         | Huwe1 (Kiaa0312) (Ureb1) | 33  | 91  | 39  | 36  |
| P35969 | Vascular endothelial growth factor receptor 1 (VEGFR-1) (EC 2.7.10.1) (Tyrosine-protein kinase receptor FLT) (FLT-1) (Embryonic receptor kinase 2)                                                                  | Flt1 (Emrk2) (Flt)       | 29  | 36  | 35  | 32  |
| Q01853 | Transitional endoplasmic reticulum ATPase (TER ATPase) (15S Mg(2+)-ATPase p97 subunit) (Valosin-containing protein) (VCP)                                                                                           | Vcp                      | 691 | 699 | 56  | 51  |
| Q9WTR0 | Matrix metalloproteinase-16 (MMP-16) (EC 3.4.24.-) (Membrane-type matrix metalloproteinase 3) (MT-MMP 3) (MTMMP3) (Membrane-type-3 matrix metalloproteinase) (MT3-MMP) (MT3MMP)                                     | Mmp16                    | 17  | 36  | 11  | 10  |
| Q8CGC7 | Bifunctional aminoacyl-tRNA synthetase [Includes: Glutamyl-tRNA synthetase (EC 6.1.1.17) (Glutamate--tRNA ligase); Prolyl-tRNA synthetase (EC 6.1.1.15) (Proline--tRNA ligase)]                                     | Eprs (Qprs)              | 130 | 102 | 32  | 29  |
| Q8VDD5 | Myosin-9 (Myosin heavy chain 9) (Myosin heavy chain, non-muscle IIa) (Non-muscle myosin heavy chain IIa) (NMMHC II-a) (NMMHC-IIA) (Cellular myosin heavy chain, type A) (Non-muscle myosin heavy chain-A) (NMMHC-A) | Myh9                     | 780 | 839 | 127 | 115 |
| P07310 | Creatine kinase M-type (EC 2.7.3.2) (Creatine kinase M chain) (M-CK)                                                                                                                                                | Ckm (Ckmm)               | 73  | 107 | 31  | 28  |
| Q9QZH3 | Peptidyl-prolyl cis-trans isomerase E (PPlase E) (Rotamase E) (EC 5.2.1.8) (Cyclophilin E) (Cyclophilin-33)                                                                                                         | Ppie (Cyp33)             | 28  | 35  | 10  | 9   |
| Q925Q8 | Dachshund homolog 2 (Dach2)                                                                                                                                                                                         | Dach2                    | 22  | 30  | 9   | 8   |



|        |                                                                                                                                                                 |                                    |     |      |    |    |
|--------|-----------------------------------------------------------------------------------------------------------------------------------------------------------------|------------------------------------|-----|------|----|----|
| P43277 | Histone H1.3 (H1 VAR.4) (H1d)                                                                                                                                   | Hist1h1d (H1f3)                    | 78  | 99   | 18 | 16 |
| Q68FD5 | Clathrin heavy chain 1                                                                                                                                          | Cltc                               | 944 | 884  | 88 | 78 |
| Q99104 | Myosin-Va (Dilute myosin heavy chain, non-muscle)                                                                                                               | Myo5a (Dilute)                     | 28  | 34   | 35 | 31 |
| Q9DBJ1 | Phosphoglycerate mutase 1 (EC 5.4.2.1) (EC 5.4.2.4) (EC 3.1.3.13) (Phosphoglycerate mutase isozyme B) (PGAM-B) (BPG-dependent PGAM 1)                           | Pgam1                              | 612 | 746  | 35 | 31 |
| Q8BG95 | Protein phosphatase 1 regulatory subunit 12B (Myosin phosphatase-targeting subunit 2)                                                                           | Ppp1r12b (Mypt2)                   | 25  | 24   | 25 | 22 |
| Q9R0P5 | Destrin (Actin-depolymerizing factor) (ADF) (Sid 23)                                                                                                            | Dstn (Dsn) (Sid23)                 | 61  | 81   | 8  | 7  |
| P70195 | Proteasome subunit beta type-7 (EC 3.4.25.1) (Proteasome subunit Z) (Macropain chain Z) (Multicatalytic endopeptidase complex chain Z)                          | Psmb7 (Mmc14)                      | 39  | 40   | 8  | 7  |
| Q02053 | Ubiquitin-like modifier-activating enzyme 1 (Ubiquitin-activating enzyme E1) (Ubiquitin-like modifier-activating enzyme 1 X) (Ubiquitin-activating enzyme E1 X) | Uba1 (Sbx) (Ube1) (Ube1ax) (Ube1x) | 660 | 1086 | 63 | 55 |
| Q8VHE6 | Dynein heavy chain 5, axonemal (Axonemal beta dynein heavy chain 5) (Mdnah5) (Ciliary dynein heavy chain 5)                                                     | Dnah5 (Dnahc5)                     | 47  | 44   | 83 | 72 |
| Q924C1 | Exportin-5 (Exp5) (Ran-binding protein 21)                                                                                                                      | Xpo5 (Kiaa1291) (Ranbp21)          | 20  | 62   | 15 | 13 |
| P21550 | Beta-enolase (EC 4.2.1.11) (2-phospho-D-glycerate hydro-lyase) (Muscle-specific enolase) (MSE) (Skeletal muscle enolase) (Enolase 3)                            | Eno3 (Eno-3)                       | 313 | 146  | 30 | 26 |
| Q11011 | Puromycin-sensitive aminopeptidase (PSA) (EC 3.4.11.-)                                                                                                          | Npepps (Psa)                       | 71  | 141  | 30 | 26 |
| Q9Z1Q9 | Valyl-tRNA synthetase (EC 6.1.1.9) (Valine--tRNA ligase) (ValRS) (Protein G7a)                                                                                  | Vars (Bat6) (G7a) (Vars2)          | 380 | 302  | 37 | 32 |

|        |                                                                                                                                                                                                             |                       |     |     |    |    |
|--------|-------------------------------------------------------------------------------------------------------------------------------------------------------------------------------------------------------------|-----------------------|-----|-----|----|----|
| Q9JJK8 | Serine/threonine-protein kinase ATR (EC 2.7.11.1) (Ataxia telangiectasia and Rad3-related protein)                                                                                                          | Atr                   | 20  | 25  | 72 | 62 |
| Q9D868 | Peptidyl-prolyl cis-trans isomerase H (PPIase H) (Rotamase H) (EC 5.2.1.8)                                                                                                                                  | Ppih                  | 55  | 31  | 7  | 6  |
| P67984 | 60S ribosomal protein L22 (Heparin-binding protein HBp15)                                                                                                                                                   | Rpl22                 | 59  | 48  | 7  | 6  |
| O88866 | Hormonally up-regulated neu tumor-associated kinase (EC 2.7.11.1) (Serine/threonine-protein kinase MAK-V)                                                                                                   | Hunk (Makv)           | 27  | 21  | 14 | 12 |
| P35979 | 60S ribosomal protein L12                                                                                                                                                                                   | Rpl12                 | 208 | 389 | 14 | 12 |
| P97784 | Cryptochrome-1                                                                                                                                                                                              | Cry1                  | 52  | 42  | 21 | 18 |
| Q9R194 | Cryptochrome-2                                                                                                                                                                                              | Cry2 (Kiaa0658)       | 52  | 42  | 21 | 18 |
| Q9CZM2 | 60S ribosomal protein L15                                                                                                                                                                                   | Rpl15                 | 225 | 107 | 21 | 18 |
| Q6ZWN5 | 40S ribosomal protein S9                                                                                                                                                                                    | Rps9                  | 459 | 248 | 47 | 40 |
| Q9JM52 | Misshapen-like kinase 1 (EC 2.7.11.1) (Mitogen-activated protein kinase kinase kinase 6) (MAPK/ERK kinase kinase 6) (MEK kinase kinase 6) (MEKKK 6) (Misshapen/NIK-related kinase) (GCK family kinase MiNK) | Mink1 (Map4k6) (Mink) | 18  | 54  | 13 | 11 |
| Q9CQN1 | Heat shock protein 75 kDa, mitochondrial (HSP 75) (Tumor necrosis factor type 1 receptor-associated protein) (TRAP-1) (TNFR-associated protein 1)                                                           | Trap1 (Hsp75)         | 197 | 335 | 13 | 11 |
| P14131 | 40S ribosomal protein S16                                                                                                                                                                                   | Rps16                 | 160 | 126 | 19 | 16 |
| P20029 | 78 kDa glucose-regulated protein (GRP 78) (Heat shock 70 kDa protein 5) (Immunoglobulin heavy chain-binding protein) (BiP)                                                                                  | Hspa5 (Grp78)         | 262 | 312 | 25 | 21 |
| P46664 | Adenylosuccinate synthetase isozyme 2 (AMPSase 2) (AdSS 2) (EC 6.3.4.4) (Adenylosuccinate synthetase, non-muscle isozyme) (Adenylosuccinate synthetase, acidic isozyme) (IMP--aspartate ligase 2)           | Adss (Adss2)          | 36  | 66  | 12 | 10 |

|        |                                                                                                                                                                                                                                                                                                                                                                                                                                                                         |                             |      |      |     |     |
|--------|-------------------------------------------------------------------------------------------------------------------------------------------------------------------------------------------------------------------------------------------------------------------------------------------------------------------------------------------------------------------------------------------------------------------------------------------------------------------------|-----------------------------|------|------|-----|-----|
| Q99PP7 | E3 ubiquitin-protein ligase TRIM33 (EC 6.3.2.-) (Tripartite motif-containing protein 33) (Transcription intermediary factor 1-gamma) (TIF1-gamma) (Ectodermin homolog)                                                                                                                                                                                                                                                                                                  | Trim33 (Kiaa1113)           | 33   | 25   | 12  | 10  |
| Q05816 | Fatty acid-binding protein, epidermal (E-FABP) (Fatty acid-binding protein 5) (Psoriasis-associated fatty acid-binding protein homolog) (PA-FABP) (Keratinocyte lipid-binding protein)                                                                                                                                                                                                                                                                                  | Fabp5 (Fabpe) (Klbp) (Mal1) | 331  | 206  | 18  | 15  |
| P11983 | T-complex protein 1 subunit alpha B (TCP-1-alpha) (CCT-alpha) (Tailless complex polypeptide 1B) (TCP-1-B)                                                                                                                                                                                                                                                                                                                                                               | Cct1 (Ccta) (Tcpl)          | 29   | 66   | 18  | 15  |
| Q64514 | Tripeptidyl-peptidase 2 (EC 3.4.14.10) (Tripeptidyl-peptidase II) (TPP-II) (Tripeptidyl aminopeptidase)                                                                                                                                                                                                                                                                                                                                                                 | Tpp2                        | 54   | 76   | 24  | 20  |
| P20357 | Microtubule-associated protein 2 (MAP-2)                                                                                                                                                                                                                                                                                                                                                                                                                                | Map2 (Mtap2)                | 50   | 22   | 30  | 25  |
| P11531 | Dystrophin                                                                                                                                                                                                                                                                                                                                                                                                                                                              | Dmd                         | 25   | 16   | 66  | 55  |
| Q91XQ0 | Dynein heavy chain 8, axonemal (Axonemal beta dynein heavy chain 8) (Ciliary dynein heavy chain 8)                                                                                                                                                                                                                                                                                                                                                                      | Dnahc8                      | 47   | 51   | 77  | 64  |
| P19096 | Fatty acid synthase (EC 2.3.1.85) [Includes: [Acyl-carrier-protein] S-acetyltransferase (EC 2.3.1.38); [Acyl-carrier-protein] S-malonyltransferase (EC 2.3.1.39); 3-oxoacyl-[acyl-carrier-protein] synthase (EC 2.3.1.41); 3-oxoacyl-[acyl-carrier-protein] reductase (EC 1.1.1.100); 3-hydroxypalmitoyl-[acyl-carrier-protein] dehydratase (EC 4.2.1.61); Enoyl-[acyl-carrier-protein] reductase (EC 1.3.1.10); Oleoyl [acyl-carrier-protein] hydrolase (EC 3.1.2.14)] | Fasn                        | 1869 | 1524 | 163 | 135 |

|        |                                                                                                                                                                                                                                                                |                               |     |     |    |    |
|--------|----------------------------------------------------------------------------------------------------------------------------------------------------------------------------------------------------------------------------------------------------------------|-------------------------------|-----|-----|----|----|
| Q8R429 | Sarcoplasmic/endoplasmic reticulum calcium ATPase 1 (SERCA1) (EC 3.6.3.8) (Calcium pump 1) (Calcium-transporting ATPase sarcoplasmic reticulum type, fast twitch skeletal muscle isoform) (SR Ca(2+)-ATPase 1) (Endoplasmic reticulum class 1/2 Ca(2+) ATPase) | Atp2a1                        | 25  | 17  | 17 | 14 |
| P80316 | T-complex protein 1 subunit epsilon (TCP-1-epsilon) (CCT-epsilon)                                                                                                                                                                                              | Cct5 (Ccte) (Kiaa0098)        | 239 | 102 | 17 | 14 |
| Q6DFV7 | Nuclear receptor coactivator 7                                                                                                                                                                                                                                 | Ncoa7                         | 25  | 16  | 11 | 9  |
| P14206 | 40S ribosomal protein SA (Laminin receptor 1) (p40) (34/67 kDa laminin receptor) (37 kDa oncofetal antigen) (OFA/iLRP)                                                                                                                                         | Rpsa (Lamr1) (P40-8)          | 131 | 112 | 11 | 9  |
| Q6ZQ38 | Cullin-associated NEDD8-dissociated protein 1 (Cullin-associated and neddylation-dissociated protein 1) (p120 CAND1)                                                                                                                                           | Cand1 (D10Ert516e) (Kiaa0829) | 221 | 246 | 33 | 27 |
| P42227 | Signal transducer and activator of transcription 3 (Acute-phase response factor)                                                                                                                                                                               | Stat3 (Aprf)                  | 16  | 28  | 33 | 27 |
| Q569Z5 | Probable ATP-dependent RNA helicase DDX46 (EC 3.6.1.-) (DEAD box protein 46)                                                                                                                                                                                   | Ddx46 (Kiaa0801)              | 25  | 17  | 21 | 17 |
| Q80ZW0 | Serine/threonine-protein kinase 35 (EC 2.7.11.1)                                                                                                                                                                                                               | Stk35                         | 14  | 50  | 21 | 17 |
| Q64512 | Tyrosine-protein phosphatase non-receptor type 13 (EC 3.1.3.48) (Protein tyrosine phosphatase PTP-BL) (Protein-tyrosine phosphatase RIP) (Protein tyrosine phosphatase DPZPTP) (PTP36)                                                                         | Ptpn13 (Ptp14)                | 28  | 27  | 26 | 21 |
| Q62407 | Striated muscle-specific serine/threonine protein kinase (EC 2.7.11.1) (Aortic preferentially expressed protein 1) (APEG-1)                                                                                                                                    | Speg (Apeg1) (Kiaa1297)       | 26  | 20  | 31 | 25 |
| P17182 | Alpha-enolase (EC 4.2.1.11) (2-phospho-D-glycerate hydro-lyase) (Non-neural enolase) (NNE) (Enolase 1)                                                                                                                                                         | Eno1 (Eno-1)                  | 976 | 802 | 62 | 50 |

|        |                                                                                                                                                 |                                        |     |     |     |     |
|--------|-------------------------------------------------------------------------------------------------------------------------------------------------|----------------------------------------|-----|-----|-----|-----|
| Q5XJY5 | Coatomer subunit delta (Delta-coat protein) (Delta-COP) (Archain)                                                                               | Arcn1 (Copd)                           | 61  | 45  | 10  | 8   |
| P54923 | [Protein ADP-ribosylarginine] hydrolase (ADP-ribosylarginine hydrolase) (EC 3.2.2.19) (ADP-ribose-L-arginine cleaving enzyme)                   | Adprh (Arh1)                           | 20  | 41  | 15  | 12  |
| P00342 | L-lactate dehydrogenase C chain (LDH-C) (EC 1.1.1.27) (LDH testis subunit) (LDH-X)                                                              | Ldhc (Ldh-3) (Ldh3)                    | 97  | 122 | 15  | 12  |
| Q9Z2U0 | Proteasome subunit alpha type-7 (EC 3.4.25.1) (Proteasome subunit RC6-1)                                                                        | PsmA7                                  | 121 | 253 | 15  | 12  |
| P12970 | 60S ribosomal protein L7a (Surfeit locus protein 3)                                                                                             | Rpl7a (Surf-3) (Surf3)                 | 111 | 31  | 15  | 12  |
| Q99MD9 | Nuclear autoantigenic sperm protein (NASP)                                                                                                      | Nasp                                   | 365 | 293 | 34  | 27  |
| Q8BP67 | 60S ribosomal protein L24                                                                                                                       | Rpl24                                  | 354 | 214 | 24  | 19  |
| Q8C196 | Carbamoyl-phosphate synthase [ammonia], mitochondrial (EC 6.3.4.16) (Carbamoyl-phosphate synthetase I) (CPSase I)                               | Cps1                                   | 22  | 25  | 19  | 15  |
| Q80Z16 | E3 ubiquitin-protein ligase LRSAM1 (EC 6.3.2.-) (Leucine-rich repeat and sterile alpha motif-containing protein 1) (Tsg101-associated ligase)   | Lrsam1                                 | 19  | 35  | 19  | 15  |
| Q80UN9 | tRNA isopentenyltransferase, mitochondrial (IPTase) (EC 2.5.1.8) (Isopentenyl-diphosphate:tRNA isopentenyltransferase) (IPP transferase) (IPPT) | Trit1 (Ipt)                            | 31  | 24  | 19  | 15  |
| P62754 | 40S ribosomal protein S6 (Phosphoprotein NP33)                                                                                                  | Rps6                                   | 127 | 283 | 19  | 15  |
| Q9QWL7 | Keratin, type I cytoskeletal 17 (Cytokeratin-17) (CK-17) (Keratin-17) (K17)                                                                     | Krt17 (Krt1-17)                        | 38  | 46  | 14  | 11  |
| Q9JHU4 | Cytoplasmic dynein 1 heavy chain 1 (Cytoplasmic dynein heavy chain 1) (Dynein heavy chain, cytosolic)                                           | Dync1h1 (Dhc1) (Dnch1) (Dnchc1) (Dyhc) | 822 | 395 | 157 | 123 |

|        |                                                                                                                                                                                                                                        |                               |      |     |    |    |
|--------|----------------------------------------------------------------------------------------------------------------------------------------------------------------------------------------------------------------------------------------|-------------------------------|------|-----|----|----|
| Q6A078 | Centrosomal protein of 290 kDa (Cep290) (Nephrocystin-6)                                                                                                                                                                               | Cep290 (Kiaa0373) (Nphp6)     | 32   | 57  | 85 | 66 |
| P31254 | Ubiquitin-like modifier-activating enzyme 1 Y (Ubiquitin-activating enzyme E1 Y) (Ubiquitin-activating enzyme E1)                                                                                                                      | Ube1ay (Sby) (Ube1y) (Ube1y1) | 161  | 77  | 22 | 17 |
| P06151 | L-lactate dehydrogenase A chain (LDH-A) (EC 1.1.1.27) (LDH muscle subunit) (LDH-M)                                                                                                                                                     | Ldha (Ldh-1) (Ldh1)           | 1033 | 421 | 74 | 57 |
| Q9CZW4 | Long-chain-fatty-acid--CoA ligase 3 (EC 6.2.1.3) (Long-chain acyl-CoA synthetase 3) (LACS 3)                                                                                                                                           | Acsl3 (Acs3) (Fac13)          | 41   | 37  | 13 | 10 |
| P05063 | Fructose-bisphosphate aldolase C (EC 4.1.2.13) (Brain-type aldolase) (Aldolase 3) (Zebrin II) (Scrapie-responsive protein 2)                                                                                                           | Aldoc (Aldo3) (Scrg2)         | 35   | 51  | 13 | 10 |
| Q8CGK3 | Lon protease homolog, mitochondrial (EC 3.4.21.-) (Lon protease-like protein) (LONP) (Mitochondrial ATP-dependent protease Lon) (Serine protease 15)                                                                                   | Lonp1 (Prss15)                | 21   | 30  | 43 | 33 |
| P62702 | 40S ribosomal protein S4, X isoform                                                                                                                                                                                                    | Rps4x (Rps4)                  | 402  | 304 | 30 | 23 |
| Q8JZQ2 | AFG3-like protein 2 (EC 3.4.24.-)                                                                                                                                                                                                      | Afg3l2                        | 15   | 27  | 17 | 13 |
| P47856 | Glucosamine--fructose-6-phosphate aminotransferase [isomerizing] 1 (EC 2.6.1.16) (Glutamine:fructose 6 phosphate amidotransferase 1) (GFAT 1) (GFAT1) (D-fructose-6-phosphate amidotransferase 1) (Hexosephosphate aminotransferase 1) | Gfpt1 (Gfpt)                  | 17   | 29  | 17 | 13 |
| Q569Z6 | Thyroid hormone receptor-associated protein 3 (Thyroid hormone receptor-associated protein complex 150 kDa component) (Trap150)                                                                                                        | Thrap3 (Trap150)              | 29   | 48  | 21 | 16 |
| Q99MY8 | Probable histone-lysine N-methyltransferase ASH1L (EC 2.1.1.43) (Absent small and homeotic disks protein 1 homolog) (ASH1-like protein)                                                                                                | Ash1l                         | 19   | 31  | 46 | 35 |

|        |                                                                                                                                                                                                                            |                                       |     |     |    |    |
|--------|----------------------------------------------------------------------------------------------------------------------------------------------------------------------------------------------------------------------------|---------------------------------------|-----|-----|----|----|
| P70670 | Nascent polypeptide-associated complex subunit alpha, muscle-specific form (Alpha-NAC, muscle-specific form)                                                                                                               | Naca (Gm1878)                         | 22  | 130 | 29 | 22 |
| P16627 | Heat shock 70 kDa protein 1L (Heat shock 70 kDa protein 1-like) (Heat shock 70 kDa-like protein 1) (Spermatid-specific heat shock protein 70)                                                                              | Hspa1l (Hsc70t)                       | 319 | 238 | 33 | 25 |
| P56480 | ATP synthase subunit beta, mitochondrial (EC 3.6.3.14)                                                                                                                                                                     | Atp5b                                 | 31  | 50  | 8  | 6  |
| Q02956 | Protein kinase C zeta type (EC 2.7.11.13) (nPKC-zeta)                                                                                                                                                                      | Prkcz (PkcZ)                          | 29  | 15  | 8  | 6  |
| Q9DBP5 | UMP-CMP kinase (EC 2.7.4.14) (Cytidylate kinase) (Deoxycytidylate kinase) (Cytidine monophosphate kinase) (Uridine monophosphate kinase) (Uridine monophosphate/cytidine monophosphate kinase) (UMP/CMP kinase) (UMP/CMPK) | Cmpk1 (Cmk) (Cmpk) (Uck) (Umk) (Umpk) | 107 | 93  | 12 | 9  |
| P25233 | Necdin                                                                                                                                                                                                                     | Ndn                                   | 30  | 23  | 16 | 12 |
| P62751 | 60S ribosomal protein L23a                                                                                                                                                                                                 | Rpl23a                                | 75  | 49  | 16 | 12 |
| Q8K1F9 | Lactase-like protein (Klotho/lactase-phlorizin hydrolase-related protein)                                                                                                                                                  | Lctl (Klph)                           | 27  | 21  | 24 | 18 |
| Q8K045 | Serine/threonine-protein kinase N3 (EC 2.7.11.13) (Protein kinase PKN-beta) (Protein-kinase C-related kinase 3)                                                                                                            | Pkn3 (Pknbeta)                        | 130 | 126 | 36 | 27 |
| Q6P3Y5 | Zinc finger protein 280C (Suppressor of hairy wing homolog 3)                                                                                                                                                              | Znf280c (Kiaa1584) (Suhw3) (Zfp280c)  | 87  | 142 | 43 | 32 |
| P58681 | Toll-like receptor 7                                                                                                                                                                                                       | Tlr7                                  | 27  | 33  | 23 | 17 |
| P62264 | 40S ribosomal protein S14                                                                                                                                                                                                  | Rps14                                 | 163 | 166 | 15 | 11 |
| P25444 | 40S ribosomal protein S2 (S4) (LLRep3 protein)                                                                                                                                                                             | Rps2 (Llrep3) (Rps4)                  | 217 | 50  | 26 | 19 |
| Q61656 | Probable ATP-dependent RNA helicase DDX5 (EC 3.6.1.-) (DEAD box protein 5) (RNA helicase p68) (DEAD box RNA helicase DEAD1) (mDEAD1)                                                                                       | Ddx5 (Tnz2)                           | 90  | 43  | 11 | 8  |

|        |                                                                                                                               |                                                                  |     |     |    |    |
|--------|-------------------------------------------------------------------------------------------------------------------------------|------------------------------------------------------------------|-----|-----|----|----|
| P62991 | Ubiquitin                                                                                                                     | Rps27a<br>(Uba80)<br>(Ubcep1);<br>Uba52<br>(Ubcep2);<br>Ubb; Ubc | 61  | 54  | 11 | 8  |
| Q61696 | Heat shock 70 kDa protein 1A (Heat shock 70 kDa protein 3) (HSP70.3) (Hsp68)                                                  | Hspa1a<br>(Hsp70-3)<br>(Hsp70A1)                                 | 266 | 236 | 33 | 24 |
| Q9CR57 | 60S ribosomal protein L14                                                                                                     | Rpl14                                                            | 508 | 391 | 33 | 24 |
| Q61699 | Heat shock protein 105 kDa (Heat shock-related 100 kDa protein E7I) (HSP-E7I) (Heat shock 110 kDa protein) (42 degrees C-HSP) | Hsph1<br>(Hsp105)<br>(Hsp110)<br>(Kiaa0201)                      | 46  | 48  | 18 | 13 |
| P27659 | 60S ribosomal protein L3 (J1 protein)                                                                                         | Rpl3                                                             | 192 | 75  | 25 | 18 |
| Q64237 | Dopamine beta-hydroxylase (EC 1.14.17.1) (Dopamine beta-monoxygenase) [Cleaved into: Soluble dopamine beta-hydroxylase]       | Dbh                                                              | 44  | 23  | 7  | 5  |
| Q9CQ65 | S-methyl-5'-thioadenosine phosphorylase (EC 2.4.2.28) (5'-methylthioadenosine phosphorylase) (MTA phosphorylase) (MTAPase)    | Mtap                                                             | 48  | 36  | 7  | 5  |
| Q99LG2 | Transportin-2 (Karyopherin beta-2b)                                                                                           | Tnpo2                                                            | 42  | 32  | 7  | 5  |
| Q60673 | Receptor-type tyrosine-protein phosphatase-like N (R-PTP-N) (PTP IA-2)                                                        | Ptprn (Ptp35)                                                    | 30  | 18  | 14 | 10 |
| P14148 | 60S ribosomal protein L7                                                                                                      | Rpl7                                                             | 145 | 52  | 14 | 10 |
| Q03172 | Zinc finger protein 40 (Transcription factor alphaA-CRYBP1) (Alpha A-crystallin-binding protein I) (Alpha A-CRYBP1)           | Hivep1<br>(Cryabp1)<br>(Znf40)                                   | 25  | 24  | 21 | 15 |
| P14869 | 60S acidic ribosomal protein P0 (L10E)                                                                                        | Rplp0 (Arbp)                                                     | 115 | 334 | 28 | 20 |
| P17751 | Triosephosphate isomerase (TIM) (EC 5.3.1.1) (Triose-phosphate isomerase)                                                     | Tpi1 (Tpi)                                                       | 706 | 519 | 35 | 25 |



|        |                                                                                                                                                                                                                               |                              |      |     |    |    |
|--------|-------------------------------------------------------------------------------------------------------------------------------------------------------------------------------------------------------------------------------|------------------------------|------|-----|----|----|
| Q920E5 | Farnesyl pyrophosphate synthetase (FPP synthetase) (FPS) (Farnesyl diphosphate synthetase) (Cholesterol-regulated 39 kDa protein) (CR 39) [Includes: Dimethylallyltransferase (EC 2.5.1.1); Geranyltransferase (EC 2.5.1.10)] | Fdps                         | 107  | 43  | 17 | 12 |
| Q60692 | Proteasome subunit beta type-6 (EC 3.4.25.1) (Proteasome delta chain) (Macropain delta chain) (Multicatalytic endopeptidase complex delta chain) (Proteasome subunit Y)                                                       | Psmb6 (Lmp19)                | 33   | 89  | 17 | 12 |
| P51410 | 60S ribosomal protein L9                                                                                                                                                                                                      | Rpl9                         | 187  | 212 | 17 | 12 |
| Q8BMJ2 | Leucyl-tRNA synthetase, cytoplasmic (EC 6.1.1.4) (Leucine--tRNA ligase) (LeuRS)                                                                                                                                               | Lars                         | 52   | 45  | 47 | 33 |
| Q7TQI3 | Ubiquitin thioesterase OTUB1 (EC 3.1.2.-) (Otubain-1) (OTU domain-containing ubiquitin aldehyde-binding protein 1) (Ubiquitin-specific-processing protease OTUB1) (Deubiquitinating enzyme OTUB1)                             | Otub1                        | 152  | 109 | 10 | 7  |
| Q91YJ5 | Translation initiation factor IF-2, mitochondrial (IF-2Mt) (IF2(mt)) (IF-2(Mt))                                                                                                                                               | Mtif2                        | 29   | 23  | 13 | 9  |
| Q52KI8 | Serine/arginine repetitive matrix protein 1 (Plenty-of-prolines 101)                                                                                                                                                          | Srrm1 (Pop101)               | 22   | 73  | 29 | 20 |
| Q99PV0 | Pre-mRNA-processing-splicing factor 8 (Splicing factor Prp8)                                                                                                                                                                  | Prpf8 (Prp8)                 | 28   | 29  | 51 | 35 |
| Q9CWF2 | Tubulin beta-2B chain                                                                                                                                                                                                         | Tubb2b                       | 1435 | 825 | 86 | 59 |
| P99024 | Tubulin beta-5 chain                                                                                                                                                                                                          | Tubb5                        | 1377 | 976 | 88 | 60 |
| Q80TP3 | E3 ubiquitin-protein ligase UBR5 (EC 6.3.2.-) (E3 ubiquitin-protein ligase, HECT domain-containing 1) (Hyperplastic discs protein homolog)                                                                                    | Ubr5 (Edd) (Edd1) (Kiaa0896) | 27   | 17  | 43 | 29 |
| Q6PHN9 | Ras-related protein Rab-35                                                                                                                                                                                                    | Rab35                        | 17   | 59  | 3  | 2  |

|        |                                                                                                                                                                               |                       |      |     |    |    |
|--------|-------------------------------------------------------------------------------------------------------------------------------------------------------------------------------|-----------------------|------|-----|----|----|
| Q8C9S8 | Cysteine protease ATG4A (EC 3.4.22.-) (Autophagy-related protein 4 homolog A) (Autophagin-2) (Autophagy-related cysteine endopeptidase 2) (AUT-like 2 cysteine endopeptidase) | Atg4a (Apg4a) (Autl2) | 26   | 21  | 6  | 4  |
| Q99LD8 | N(G),N(G)-dimethylarginine dimethylaminohydrolase 2 (Dimethylarginine dimethylaminohydrolase 2) (DDAH-2) (EC 3.5.3.18) (DDAHII) (Dimethylargininase-2)                        | Ddah2                 | 103  | 92  | 9  | 6  |
| P43275 | Histone H1.1 (H1 VAR.3) (H1a)                                                                                                                                                 | Hist1h1a (H1f1)       | 28   | 90  | 9  | 6  |
| Q9WV07 | Epidermis-type lipoxygenase 3 (e-LOX-3) (EC 1.13.11.-)                                                                                                                        | Aloxe3                | 25   | 22  | 9  | 6  |
| P61979 | Heterogeneous nuclear ribonucleoprotein K (hnRNP K)                                                                                                                           | Hnrnpk (Hnrpk)        | 225  | 46  | 18 | 12 |
| Q8K4L3 | Supervillin (Archvillin) (p205/p250)                                                                                                                                          | Svil                  | 25   | 22  | 18 | 12 |
| O88444 | Adenylate cyclase type 1 (EC 4.6.1.1) (Adenylate cyclase type I) (ATP pyrophosphate-lyase 1) (Adenylyl cyclase 1) (Ca(2+)/calmodulin-activated adenylyl cyclase)              | Adcy1                 | 33   | 31  | 26 | 17 |
| P68372 | Tubulin beta-2C chain                                                                                                                                                         | Tubb2c                | 1300 | 891 | 78 | 51 |
| P42932 | T-complex protein 1 subunit theta (TCP-1-theta) (CCT-theta)                                                                                                                   | Cct8 (Cctq)           | 197  | 57  | 23 | 15 |
| Q924W6 | Tripartite motif-containing protein 66 (Transcriptional intermediary factor 1 delta)                                                                                          | Trim66 (Tif1d)        | 28   | 18  | 23 | 15 |
| O70435 | Proteasome subunit alpha type-3 (EC 3.4.25.1) (Proteasome component C8) (Macropain subunit C8) (Multicatalytic endopeptidase complex subunit C8) (Proteasome subunit K)       | Psma3                 | 95   | 76  | 14 | 9  |
| Q9CXW4 | 60S ribosomal protein L11                                                                                                                                                     | Rpl11                 | 72   | 79  | 11 | 7  |

|        |                                                                                                                                                                                                                                                                                                        |                              |      |     |    |    |
|--------|--------------------------------------------------------------------------------------------------------------------------------------------------------------------------------------------------------------------------------------------------------------------------------------------------------|------------------------------|------|-----|----|----|
| Q8CG48 | Structural maintenance of chromosomes protein 2 (Chromosome-associated protein E) (XCAP-E homolog) (FGF-inducible protein 16)                                                                                                                                                                          | Smc2 (Cape) (Fin16) (Smc2l1) | 32   | 36  | 41 | 26 |
| Q7TMM9 | Tubulin beta-2A chain                                                                                                                                                                                                                                                                                  | Tubb2a (Tubb2)               | 1422 | 775 | 83 | 52 |
| Q61983 | Sodium-dependent phosphate transport protein 1 (Sodium/phosphate cotransporter 1) (Na(+)/PI cotransporter 1) (Solute carrier family 17 member 1) (Renal sodium-dependent phosphate transport protein 1) (Renal sodium-phosphate transport protein 1) (Renal Na(+)-dependent phosphate cotransporter 1) | Slc17a1 (Npt1)               | 31   | 33  | 8  | 5  |
| Q9QZ09 | Putative homeodomain transcription factor 1                                                                                                                                                                                                                                                            | Phtf1 (Phtf)                 | 29   | 24  | 8  | 5  |
| Q80U87 | Ubiquitin carboxyl-terminal hydrolase 8 (EC 3.1.2.15) (Ubiquitin thioesterase 8) (Ubiquitin-specific-processing protease 8) (Deubiquitinating enzyme 8) (mUBPy)                                                                                                                                        | Usp8 (Kiaa0055) (Ubpy)       | 29   | 23  | 24 | 15 |
| P62717 | 60S ribosomal protein L18a                                                                                                                                                                                                                                                                             | Rpl18a                       | 242  | 62  | 21 | 13 |
| P16125 | L-lactate dehydrogenase B chain (LDH-B) (EC 1.1.1.27) (LDH heart subunit) (LDH-H)                                                                                                                                                                                                                      | Ldhb (Ldh-2) (Ldh2)          | 315  | 214 | 34 | 21 |
| P17156 | Heat shock-related 70 kDa protein 2 (Heat shock protein 70.2)                                                                                                                                                                                                                                          | Hspa2 (Hcp70.2) (Hsp70-2)    | 964  | 544 | 60 | 37 |
| P84099 | 60S ribosomal protein L19                                                                                                                                                                                                                                                                              | Rpl19                        | 39   | 47  | 13 | 8  |
| P62301 | 40S ribosomal protein S13                                                                                                                                                                                                                                                                              | Rps13                        | 77   | 100 | 23 | 14 |
| O08709 | Peroxiredoxin-6 (EC 1.11.1.15) (Antioxidant protein 2) (1-Cys peroxiredoxin) (1-Cys PRX) (Acidic calcium-independent phospholipase A2) (aiPLA2) (EC 3.1.1.-) (Non-selenium glutathione peroxidase) (NSGPx) (EC 1.11.1.7)                                                                               | Prdx6 (Aop2) (Ltw4) (Prdx5)  | 56   | 29  | 5  | 3  |

|        |                                                                                                                                                                                                                               |                             |      |     |     |    |
|--------|-------------------------------------------------------------------------------------------------------------------------------------------------------------------------------------------------------------------------------|-----------------------------|------|-----|-----|----|
| Q88291 | Zinc finger protein 326 (Zinc finger protein-associated with nuclear matrix of 75 kDa)                                                                                                                                        | Znf326 (Zan75) (Zfp326)     | 41   | 55  | 5   | 3  |
| Q9D1R9 | 60S ribosomal protein L34                                                                                                                                                                                                     | Rpl34                       | 34   | 32  | 10  | 6  |
| Q9EQZ6 | Rap guanine nucleotide exchange factor 4 (cAMP-regulated guanine nucleotide exchange factor II) (cAMP-GEFII) (Exchange factor directly activated by cAMP 2) (Epac 2) (cAMP-dependent Rap1 guanine-nucleotide exchange factor) | Rapgef4 (Cgef2) (Epac2)     | 47   | 23  | 20  | 12 |
| Q8R4K8 | Pappalysin-1 (EC 3.4.24.79) (Pregnancy-associated plasma protein A) (PAPP-A) (Insulin-like growth factor-dependent IGF-binding protein 4 protease) (IGF-dependent IGFBP-4 protease) (IGFBP-4ase)                              | Pappa                       | 41   | 43  | 25  | 15 |
| Q6NZJ6 | Eukaryotic translation initiation factor 4 gamma 1 (eIF-4-gamma 1) (eIF-4G 1) (eIF-4G1)                                                                                                                                       | Eif4g1                      | 47   | 113 | 30  | 18 |
| P63038 | 60 kDa heat shock protein, mitochondrial (Heat shock protein 60) (HSP-60) (Hsp60) (60 kDa chaperonin) (Chaperonin 60) (CPN60) (Mitochondrial matrix protein P1) (HSP-65)                                                      | Hspd1 (Hsp60)               | 15   | 32  | 22  | 13 |
| P80317 | T-complex protein 1 subunit zeta (TCP-1-zeta) (CCT-zeta) (CCT-zeta-1)                                                                                                                                                         | Cct6a (Cct6) (Cctz) (Cctz1) | 160  | 52  | 22  | 13 |
| P10630 | Eukaryotic initiation factor 4A-II (eIF-4A-II) (eIF4A-II) (EC 3.6.1.-) (ATP-dependent RNA helicase eIF4A-2)                                                                                                                   | Eif4a2 (Ddx2b)              | 194  | 78  | 17  | 10 |
| P09041 | Phosphoglycerate kinase 2 (EC 2.7.2.3) (Phosphoglycerate kinase, testis specific)                                                                                                                                             | Pgk2 (Pgk-2)                | 162  | 73  | 17  | 10 |
| P63017 | Heat shock cognate 71 kDa protein (Heat shock 70 kDa protein 8)                                                                                                                                                               | Hspa8 (Hsc70) (Hsc73)       | 1719 | 959 | 119 | 70 |

|        |                                                                                                                                                      |                             |     |     |    |    |
|--------|------------------------------------------------------------------------------------------------------------------------------------------------------|-----------------------------|-----|-----|----|----|
| P05532 | Mast/stem cell growth factor receptor (SCFR) (EC 2.7.10.1) (Proto-oncogene tyrosine-protein kinase Kit) (c-kit) (CD antigen CD117)                   | Kit (SI)                    | 16  | 35  | 12 | 7  |
| P62900 | 60S ribosomal protein L31                                                                                                                            | Rpl31                       | 124 | 62  | 12 | 7  |
| Q9JI78 | Peptide-N(4)-(N-acetyl-beta-glucosaminy)asparagine amidase (PNGase) (mPNGase) (EC 3.5.1.52) (Peptide:N-glycanase) (N-glycanase 1)                    | Ngly1                       | 29  | 32  | 19 | 11 |
| P41105 | 60S ribosomal protein L28                                                                                                                            | Rpl28                       | 49  | 41  | 19 | 11 |
| Q9CZX8 | 40S ribosomal protein S19                                                                                                                            | Rps19                       | 206 | 146 | 19 | 11 |
| P47963 | 60S ribosomal protein L13 (A52)                                                                                                                      | Rpl13                       | 744 | 379 | 47 | 27 |
| P53762 | Aryl hydrocarbon receptor nuclear translocator (ARNT protein) (Dioxin receptor, nuclear translocator) (Hypoxia-inducible factor 1 beta) (HIF-1 beta) | Arnt                        | 25  | 22  | 7  | 4  |
| P47757 | F-actin-capping protein subunit beta (CapZ beta)                                                                                                     | Capzb (Cappb1)              | 107 | 68  | 7  | 4  |
| P26043 | Radixin (ESP10)                                                                                                                                      | Rdx                         | 127 | 106 | 23 | 13 |
| P49722 | Proteasome subunit alpha type-2 (EC 3.4.25.1) (Proteasome component C3) (Macropain subunit C3) (Multicatalytic endopeptidase complex subunit C3)     | Psm2 (Lmpc3)                | 188 | 103 | 16 | 9  |
| Q9R1X4 | Protein timeless homolog (mTim)                                                                                                                      | Timeless (Tim1) (Timeless1) | 22  | 25  | 16 | 9  |
| P97461 | 40S ribosomal protein S5                                                                                                                             | Rps5                        | 89  | 33  | 32 | 18 |
| Q8K2I9 | F-box only protein 18 (EC 3.6.1.-) (F-box DNA helicase 1)                                                                                            | Fbxo18 (Fbh1) (Fbx18)       | 30  | 23  | 9  | 5  |
| P63073 | Eukaryotic translation initiation factor 4E (eIF-4E) (eIF4E) (mRNA cap-binding protein) (eIF-4F 25 kDa subunit)                                      | Eif4e                       | 110 | 25  | 9  | 5  |

|                            |        |                                                                                                                                                                                                                                     |                                |     |     |    |    |
|----------------------------|--------|-------------------------------------------------------------------------------------------------------------------------------------------------------------------------------------------------------------------------------------|--------------------------------|-----|-----|----|----|
|                            | Q8BYH8 | Chromodomain-helicase-DNA-binding protein 9 (CHD-9) (EC 3.6.1.-) (ATP-dependent helicase CHD9) (Peroxisomal proliferator-activated receptor A-interacting complex 320 kDa protein) (PPAR-alpha-interacting complex protein 320 kDa) | Chd9 (Kiaa0308) (Pric320)      | 39  | 27  | 49 | 27 |
|                            | P17918 | Proliferating cell nuclear antigen (PCNA) (Cyclin)                                                                                                                                                                                  | Pcna                           | 273 | 207 | 20 | 11 |
|                            | O35664 | Interferon-alpha/beta receptor beta chain (Interferon alpha/beta receptor 2) (IFN-alpha-REC) (Type I interferon receptor) (IFN-R)                                                                                                   | Ifnar2                         | 37  | 21  | 11 | 6  |
|                            | Q9WUJ8 | Origin recognition complex subunit 6                                                                                                                                                                                                | Orc6l (Orc6)                   | 59  | 37  | 13 | 7  |
|                            | Q9D6F9 | Tubulin beta-4 chain                                                                                                                                                                                                                | Tubb4                          | 888 | 493 | 58 | 31 |
|                            | O88844 | Isocitrate dehydrogenase [NADP] cytoplasmic (IDH) (EC 1.1.1.42) (Cytosolic NADP-isocitrate dehydrogenase) (Oxalosuccinate decarboxylase) (NADP(+)-specific ICDH) (IDP)                                                              | Idh1                           | 155 | 163 | 15 | 8  |
|                            | Q61390 | T-complex protein 1 subunit zeta-2 (TCP-1-zeta-2) (CCT-zeta-2) (Cctz-2)                                                                                                                                                             | Cct6b                          | 55  | 52  | 15 | 8  |
|                            | P11103 | Poly [ADP-ribose] polymerase 1 (PARP-1) (EC 2.4.2.30) (ADPRT) (NAD(+) ADP-ribosyltransferase 1) (Poly[ADP-ribose] synthetase 1) (msPARP)                                                                                            | Parp1 (Adprp) (Adprt) (Adprt1) | 21  | 26  | 17 | 9  |
|                            | Q922F4 | Tubulin beta-6 chain                                                                                                                                                                                                                | Tubb6                          | 583 | 382 | 40 | 21 |
|                            | P97351 | 40S ribosomal protein S3a                                                                                                                                                                                                           | Rps3a                          | 899 | 392 | 50 | 26 |
|                            | Q9ERD7 | Tubulin beta-3 chain                                                                                                                                                                                                                | Tubb3                          | 780 | 383 | 52 | 27 |
|                            | Q80UE6 | Serine/threonine-protein kinase WNK4 (EC 2.7.11.1) (Protein kinase with no lysine 4) (Protein kinase, lysine-deficient 4)                                                                                                           | Wnk4 (Prkwnk4)                 | 23  | 33  | 29 | 15 |
| cellular metabolic process | Q3TCT4 | Ectonucleoside triphosphate diphosphohydrolase 7 (NTPDase 7) (EC 3.6.1.-) (Lysosomal apyrase-like protein 1)                                                                                                                        | Entpd7 (Kiaa4066) (Lalp1)      | 16  | 33  | 42 | 80 |
|                            | P97311 | DNA replication licensing factor MCM6 (Mis5 homolog)                                                                                                                                                                                | Mcm6 (Mcmd6) (Mis5)            | 110 | 395 | 20 | 38 |

|        |                                                                                                                                                                                     |                |     |      |    |     |
|--------|-------------------------------------------------------------------------------------------------------------------------------------------------------------------------------------|----------------|-----|------|----|-----|
| Q9CXW3 | Calcyclin-binding protein (CacyBP) (Siah-interacting protein)                                                                                                                       | Cacybp (Sip)   | 57  | 39   | 7  | 13  |
| P06745 | Glucose-6-phosphate isomerase (GPI) (EC 5.3.1.9) (Phosphoglucose isomerase) (PGI) (Phosphohexose isomerase) (PHI) (Neuroleukin) (NLK)                                               | Gpi (Gpi1)     | 39  | 107  | 12 | 22  |
| Q7TSG3 | F-box only protein 5 (Early mitotic inhibitor 1)                                                                                                                                    | Fbxo5 (Emi1)   | 15  | 27   | 5  | 9   |
| Q8BYC6 | Serine/threonine-protein kinase TAO3 (EC 2.7.11.1) (Thousand and one amino acid protein 3)                                                                                          | Taok3          | 32  | 38   | 9  | 16  |
| P62962 | Profilin-1 (Profilin I)                                                                                                                                                             | Pfn1           | 30  | 93   | 4  | 7   |
| Q64674 | Spermidine synthase (SPDSY) (EC 2.5.1.16) (Putrescine aminopropyltransferase)                                                                                                       | Srm            | 55  | 29   | 4  | 7   |
| P18760 | Cofilin-1 (Cofilin, non-muscle isoform)                                                                                                                                             | Cfl1           | 959 | 2552 | 70 | 122 |
| P17742 | Peptidyl-prolyl cis-trans isomerase A (PPIase A) (Rotamase A) (EC 5.2.1.8) (Cyclophilin A) (Cyclosporin A-binding protein) (SP18)                                                   | Ppia           | 855 | 1549 | 38 | 66  |
| Q9Z1R2 | Large proline-rich protein BAT3 (HLA-B-associated transcript 3)                                                                                                                     | Bat3           | 80  | 49   | 15 | 26  |
| Q9R117 | Non-receptor tyrosine-protein kinase TYK2 (EC 2.7.10.2)                                                                                                                             | Tyk2           | 27  | 30   | 15 | 26  |
| Q9D009 | Putative octanoyltransferase, mitochondrial (EC 2.3.1.181) (Octanoyl-[acyl-carrier-protein]-protein N-octanoyltransferase) (Lipoyl/octanoyl transferase) (Lipoate-protein ligase B) |                | 38  | 42   | 11 | 19  |
| Q8R1S0 | Ubiquinone biosynthesis monooxygenase COQ6 (EC 1.14.13.-)                                                                                                                           | Coq6           | 42  | 92   | 10 | 17  |
| Q9Z129 | ATP-dependent DNA helicase Q1 (EC 3.6.1.-) (DNA-dependent ATPase Q1)                                                                                                                | Recql (Recql1) | 17  | 27   | 13 | 22  |
| Q9ERK4 | Exportin-2 (Exp2) (Importin-alpha re-exporter) (Chromosome segregation 1-like protein)                                                                                              | Cse1l (Xpo2)   | 42  | 153  | 26 | 44  |

|        |                                                                                                                                                                                                                                          |                                                                                                                                                                               |      |      |     |     |
|--------|------------------------------------------------------------------------------------------------------------------------------------------------------------------------------------------------------------------------------------------|-------------------------------------------------------------------------------------------------------------------------------------------------------------------------------|------|------|-----|-----|
| P52480 | Pyruvate kinase isozymes M1/M2 (EC 2.7.1.40) (Pyruvate kinase muscle isozyme)                                                                                                                                                            | Pkm2 (Pk3) (Pykm)                                                                                                                                                             | 1954 | 3481 | 138 | 233 |
| Q8CGP2 | Histone H2B type 1-P                                                                                                                                                                                                                     | Hist1h2bp                                                                                                                                                                     | 436  | 999  | 46  | 77  |
| P57776 | Elongation factor 1-delta (EF-1-delta)                                                                                                                                                                                                   | Eef1d                                                                                                                                                                         | 109  | 35   | 3   | 5   |
| Q9WTL7 | Acyl-protein thioesterase 2 (EC 3.1.2.-) (Lysophospholipase II) (Lysophospholipase 2) (mLyso II)                                                                                                                                         | Lypla2                                                                                                                                                                        | 23   | 49   | 3   | 5   |
| P62960 | Nuclease-sensitive element-binding protein 1 (Y-box-binding protein 1) (Y-box transcription factor) (YB-1) (CCAAT-binding transcription factor I subunit A) (CBF-A) (Enhancer factor I subunit A) (EFI-A) (DNA-binding protein B) (DBPB) | Ybx1 (Msy-1) (Msy1) (Nsep1) (Yb1)                                                                                                                                             | 56   | 126  | 6   | 10  |
| P35980 | 60S ribosomal protein L18                                                                                                                                                                                                                | Rpl18                                                                                                                                                                         | 32   | 22   | 51  | 85  |
| P62806 | Histone H4                                                                                                                                                                                                                               | Hist1h4a;<br>Hist1h4b (H4-53); Hist1h4c (H4-12);<br>Hist1h4d;<br>Hist1h4f;<br>Hist1h4h;<br>Hist1h4i;<br>Hist1h4j;<br>Hist1h4k;<br>Hist1h4m;<br>Hist2h4a (Hist2h4);<br>Hist4h4 | 815  | 1617 | 47  | 78  |
| Q64475 | Histone H2B type 1-B (h2B-143)                                                                                                                                                                                                           | Hist1h2bb                                                                                                                                                                     | 436  | 999  | 46  | 75  |
| P15532 | Nucleoside diphosphate kinase A (NDP kinase A) (NDK A) (EC 2.7.4.6) (Tumor metastatic process-associated protein) (Metastasis inhibition factor NM23) (NDPK-A) (nm23-M1)                                                                 | Nme1 (Nm23)                                                                                                                                                                   | 150  | 261  | 8   | 13  |



|        |                                                                                                                                                     |                              |     |     |    |    |
|--------|-----------------------------------------------------------------------------------------------------------------------------------------------------|------------------------------|-----|-----|----|----|
| Q8BHG1 | Nardilysin (EC 3.4.24.61) (N-arginine dibasic convertase) (NRD convertase) (NRD-C)                                                                  | Nrd1                         | 53  | 54  | 13 | 21 |
| P19157 | Glutathione S-transferase P 1 (Gst P1) (EC 2.5.1.18) (GST YF-YF) (GST-piB) (GST class-pi) (Preadipocyte growth factor)                              | Gstp1 (Gstpib)               | 473 | 572 | 10 | 16 |
| Q6ZWX6 | Eukaryotic translation initiation factor 2 subunit 1 (Eukaryotic translation initiation factor 2 subunit alpha) (eIF-2-alpha) (EIF-2alpha) (EIF-2A) | Eif2s1 (Eif2a)               | 27  | 177 | 7  | 11 |
| Q61990 | Poly(rC)-binding protein 2 (Alpha-CP2) (Putative heterogeneous nuclear ribonucleoprotein X) (hnRNP X) (CTBP) (CBP)                                  | Pcbp2 (Cbp) (HnrnpX) (Hnrpx) | 29  | 194 | 7  | 11 |
| P63001 | Ras-related C3 botulinum toxin substrate 1 (p21-Rac1)                                                                                               | Rac1                         | 31  | 99  | 7  | 11 |
| P62082 | 40S ribosomal protein S7                                                                                                                            | Rps7                         | 104 | 126 | 9  | 14 |
| Q9Z1S0 | Mitotic checkpoint serine/threonine-protein kinase BUB1 beta (EC 2.7.11.1) (MAD3/BUB1-related protein kinase) (Mitotic checkpoint kinase MAD3L)     | Bub1b (Mad3l)                | 20  | 41  | 15 | 23 |
| P63158 | High mobility group protein B1 (High mobility group protein 1) (HMG-1)                                                                              | Hmgb1 (Hmg-1) (Hmg1)         | 153 | 405 | 25 | 38 |
| Q8K386 | Ras-related protein Rab-15                                                                                                                          | Rab15                        | 44  | 74  | 4  | 6  |
| O55142 | 60S ribosomal protein L35a                                                                                                                          | Rpl35a                       | 24  | 50  | 4  | 6  |
| P50247 | Adenosylhomocysteinase (AdoHcyase) (EC 3.3.1.1) (S-adenosyl-L-homocysteine hydrolase) (Liver copper-binding protein) (CUBP)                         | Ahcy                         | 90  | 106 | 10 | 15 |
| Q99K85 | Phosphoserine aminotransferase (PSAT) (EC 2.6.1.52) (Phosphohydroxythreonine aminotransferase) (Endometrial progesterone-induced protein) (EPIP)    | Psat1 (Psa) (Psat)           | 162 | 541 | 16 | 24 |
| P83741 | Serine/threonine-protein kinase WNK1 (EC 2.7.11.1) (Protein kinase with no lysine 1) (Protein kinase, lysine-deficient 1)                           | Wnk1 (Prkwk1)                | 56  | 36  | 18 | 27 |

|        |                                                                                                                                                                    |                                  |     |     |    |    |
|--------|--------------------------------------------------------------------------------------------------------------------------------------------------------------------|----------------------------------|-----|-----|----|----|
| P53657 | Pyruvate kinase isozymes R/L (EC 2.7.1.40) (L PK)                                                                                                                  | Pklr                             | 144 | 270 | 26 | 38 |
| P97868 | Retinoblastoma-binding protein 6 (p53-associated cellular protein of testis) (Proliferation potential-related protein) (Protein P2P-R)                             | Rbbp6 (P2pr) (Pact)              | 21  | 29  | 24 | 35 |
| Q3THW5 | Histone H2A.V (H2A.F/Z)                                                                                                                                            | H2afv (H2av)                     | 297 | 426 | 11 | 16 |
| P99026 | Proteasome subunit beta type-4 (Proteasome beta chain) (EC 3.4.25.1) (Macropain beta chain) (Multicatalytic endopeptidase complex beta chain) (Proteasome chain 3) | Psmb4 (Lmp3)                     | 93  | 289 | 11 | 16 |
| Q9QZ39 | Alpha-N-acetylgalactosaminide alpha-2,6-sialyltransferase 1 (EC 2.4.99.3) (GalNAc alpha-2,6-sialyltransferase I) (ST6GalNAc I) (Sialyltransferase 7A)              | St6galnac1 (Siat7a)              | 27  | 18  | 11 | 16 |
| P60335 | Poly(rC)-binding protein 1 (Alpha-CP1) (hnRNP-E1)                                                                                                                  | Pcbp1                            | 56  | 350 | 9  | 13 |
| P35761 | Dual specificity protein kinase TTK (ESK) (PYT) (EC 2.7.12.1)                                                                                                      | Ttk (Esk)                        | 14  | 34  | 9  | 13 |
| Q8BVI4 | Dihydropteridine reductase (EC 1.5.1.34) (HDHPR) (Quinoid dihydropteridine reductase)                                                                              | Qdpr (Dhpr)                      | 144 | 277 | 7  | 10 |
| O70251 | Elongation factor 1-beta (EF-1-beta)                                                                                                                               | Eef1b (Eef1b2)                   | 39  | 102 | 7  | 10 |
| Q00342 | FL cytokine receptor (EC 2.7.10.1) (Tyrosine-protein kinase receptor flk-2) (Fetal liver kinase 2) (Tyrosine-protein kinase FLT3) (CD antigen CD135)               | Flt3 (Flk-2) (Flt3)              | 17  | 34  | 7  | 10 |
| P12813 | Nuclear receptor subfamily 4 group A member 1 (Orphan nuclear receptor HMR) (Nuclear hormone receptor NUR/77) (N10 nuclear protein)                                | Nr4a1 (Gfrp) (Hmr) (N10) (Nur77) | 61  | 31  | 7  | 10 |

|        |                                                                                                                                                                                                                                                       |                                |      |      |    |    |
|--------|-------------------------------------------------------------------------------------------------------------------------------------------------------------------------------------------------------------------------------------------------------|--------------------------------|------|------|----|----|
| Q9Z1F9 | SUMO-activating enzyme subunit 2 (EC 6.3.2.-) (Ubiquitin-like 1-activating enzyme E1B) (Anthracycline-associated resistance ARX)                                                                                                                      | Uba2 (Sae2) (Uble1b)           | 62   | 77   | 10 | 14 |
| P68510 | 14-3-3 protein eta                                                                                                                                                                                                                                    | Ywhah                          | 707  | 962  | 58 | 80 |
| P70696 | Histone H2B type 1-A (Histone H2B, testis) (Testis-specific histone H2B)                                                                                                                                                                              | Hist1h2ba (Th2b)               | 146  | 378  | 37 | 51 |
| P05214 | Tubulin alpha-3 chain (Tubulin alpha-3/alpha-7 chain) (Alpha-tubulin 3/7) (Alpha-tubulin isotype M-alpha-3/7)                                                                                                                                         | Tuba3a (Tuba3); Tuba3b (Tuba7) | 1112 | 1288 | 61 | 84 |
| P17047 | Lysosome-associated membrane glycoprotein 2 (LAMP-2) (Lysosomal membrane glycoprotein type B) (LGP-B) (CD107 antigen-like family member B) (CD antigen CD107b)                                                                                        | Lamp2 (Lamp-2)                 | 26   | 29   | 8  | 11 |
| P27641 | ATP-dependent DNA helicase 2 subunit 2 (EC 3.6.1.-) (ATP-dependent DNA helicase II 80 kDa subunit) (Ku autoantigen protein p86 homolog) (Ku80) (CTC box-binding factor 85 kDa subunit) (CTCBF) (CTC85) (Nuclear factor IV) (DNA repair protein XRCC5) | Xrcc5 (G22p2)                  | 22   | 29   | 16 | 22 |
| P70338 | Zinc finger protein Gfi-1 (Growth factor independent protein 1)                                                                                                                                                                                       | Gfi1 (Gfi-1)                   | 45   | 39   | 17 | 23 |
| Q61789 | Laminin subunit alpha-3 (Nicein subunit alpha)                                                                                                                                                                                                        | Lama3                          | 26   | 26   | 37 | 50 |
| Q6P8J2 | Diamine acetyltransferase 2 (EC 2.3.1.57) (Spermidine/spermine N(1)-acetyltransferase 2) (Polyamine N-acetyltransferase 2)                                                                                                                            | Sat2 (Ssat2)                   | 33   | 23   | 6  | 8  |
| Q9EPL8 | Importin-7 (Imp7) (Ran-binding protein 7) (RanBP7)                                                                                                                                                                                                    | Ipo7 (Ranbp7)                  | 25   | 121  | 9  | 12 |

|        |                                                                                                                                                                                                                                                                                        |                        |     |     |    |    |
|--------|----------------------------------------------------------------------------------------------------------------------------------------------------------------------------------------------------------------------------------------------------------------------------------------|------------------------|-----|-----|----|----|
| Q9WTX2 | Interferon-inducible double stranded RNA-dependent protein kinase activator A (Protein kinase, interferon-inducible double stranded RNA-dependent activator) (Protein activator of the interferon-induced protein kinase) (PKR-associated protein X) (PKR-associating protein X) (RAX) | Prkra (Rax)            | 28  | 39  | 9  | 12 |
| Q9ERU9 | E3 SUMO-protein ligase RanBP2 (Ran-binding protein 2)                                                                                                                                                                                                                                  | Ranbp2                 | 56  | 49  | 40 | 53 |
| Q5SXJ3 | Fanconi anemia group J protein homolog (Protein FACJ) (EC 3.6.1.-) (ATP-dependent RNA helicase BRIP1) (BRCA1-interacting protein C-terminal helicase 1) (BRCA1-interacting protein 1) (BRCA1-associated C-terminal helicase 1)                                                         | Brip1 (Bach1) (Fancj)  | 25  | 18  | 13 | 17 |
| P70168 | Importin subunit beta-1 (Karyopherin subunit beta-1) (Nuclear factor P97) (Pore targeting complex 97 kDa subunit) (PTAC97) (SCG)                                                                                                                                                       | Kpnb1 (Impnb)          | 48  | 17  | 13 | 17 |
| Q9Z277 | Bromodomain adjacent to zinc finger domain protein 1B (Williams-Beuren syndrome chromosomal region 9 protein homolog) (WBRS9)                                                                                                                                                          | Baz1b (Wbscr9)         | 43  | 17  | 26 | 34 |
| Q61846 | Maternal embryonic leucine zipper kinase (EC 2.7.11.1) (Protein kinase PK38) (mPK38)                                                                                                                                                                                                   | Melk (Kiaa0175) (Pk38) | 28  | 32  | 10 | 13 |
| P47753 | F-actin-capping protein subunit alpha-1 (CapZ alpha-1)                                                                                                                                                                                                                                 | Capza1 (Cappa1)        | 60  | 33  | 7  | 9  |
| P63163 | Small nuclear ribonucleoprotein-associated protein N (snRNP-N) (Sm protein N) (Sm-N) (SmN) (Sm-D) (Tissue-specific-splicing protein)                                                                                                                                                   | Snrpn (Smn)            | 38  | 17  | 7  | 9  |
| Q7TQ07 | DNA polymerase nu (EC 2.7.7.7)                                                                                                                                                                                                                                                         | Poln                   | 20  | 39  | 14 | 18 |
| Q61753 | D-3-phosphoglycerate dehydrogenase (3-PGDH) (EC 1.1.1.95) (A10)                                                                                                                                                                                                                        | Phgdh                  | 105 | 158 | 14 | 18 |

|        |                                                                                                                                                                          |                                  |     |     |     |     |
|--------|--------------------------------------------------------------------------------------------------------------------------------------------------------------------------|----------------------------------|-----|-----|-----|-----|
| P05064 | Fructose-bisphosphate aldolase A (EC 4.1.2.13) (Muscle-type aldolase) (Aldolase 1)                                                                                       | Aldoa (Aldo1)                    | 211 | 567 | 36  | 46  |
| Q07133 | Histone H1t (Testicular H1 histone)                                                                                                                                      | Hist1h1t (H1ft) (H1t)            | 46  | 72  | 54  | 69  |
| Q923B1 | Lariat debranching enzyme (EC 3.1.-.-)                                                                                                                                   | Dbr1                             | 28  | 29  | 15  | 19  |
| P27661 | Histone H2A.x (H2a/x)                                                                                                                                                    | H2afx (H2a.x) (H2ax) (Hist5-2ax) | 301 | 426 | 15  | 19  |
| Q62093 | Splicing factor, arginine/serine-rich 2 (Splicing factor SC35) (SC-35) (Splicing component, 35 kDa) (Protein PR264) (Putative myelin regulatory factor 1) (MRF-1)        | Sfrs2 (Pr264) (Sfrs10)           | 184 | 117 | 15  | 19  |
| P28271 | Cytoplasmic aconitate hydratase (Aconitase) (EC 4.2.1.3) (Citrate hydro-lyase) (Iron-responsive element-binding protein 1) (IRE-BP 1) (Iron regulatory protein 1) (IRP1) | Aco1 (Ireb1) (Irebp)             | 77  | 122 | 147 | 184 |
| P61028 | Ras-related protein Rab-8B                                                                                                                                               | Rab8b                            | 17  | 59  | 4   | 5   |
| Q60716 | Prolyl 4-hydroxylase subunit alpha-2 (EC 1.14.11.2) (4-PH alpha-2) (Procollagen-proline,2-oxoglutarate-4-dioxygenase subunit alpha-2)                                    | P4ha2                            | 22  | 27  | 8   | 10  |
| P17183 | Gamma-enolase (EC 4.2.1.11) (2-phospho-D-glycerate hydro-lyase) (Neural enolase) (Neuron-specific enolase) (NSE) (Enolase 2)                                             | Eno2 (Eno-2)                     | 228 | 181 | 12  | 15  |
| Q811J3 | Iron-responsive element-binding protein 2 (IRE-BP 2) (Iron regulatory protein 2) (IRP2)                                                                                  | Ireb2 (Irp2)                     | 69  | 119 | 142 | 176 |
| Q61316 | Heat shock 70 kDa protein 4 (Heat shock 70-related protein APG-2)                                                                                                        | Hspa4 (Apg2) (Hsp110)            | 379 | 792 | 42  | 52  |
| Q8BU30 | Isoleucyl-tRNA synthetase, cytoplasmic (EC 6.1.1.5) (Isoleucine--tRNA ligase) (IleRS) (IRS)                                                                              | Iars                             | 85  | 46  | 30  | 37  |

|        |                                                                                                                                                                                                                             |                           |     |     |     |     |
|--------|-----------------------------------------------------------------------------------------------------------------------------------------------------------------------------------------------------------------------------|---------------------------|-----|-----|-----|-----|
| Q8BGD9 | Eukaryotic translation initiation factor 4B (eIF-4B)                                                                                                                                                                        | Eif4b                     | 238 | 306 | 13  | 16  |
| Q61466 | SWI/SNF-related matrix-associated actin-dependent regulator of chromatin subfamily D member 1 (SWI/SNF complex 60 kDa subunit) (60 kDa BRG-1/Brm-associated factor subunit A) (BRG1-associated factor 60A) (D15KZ1 protein) | Smarcd1 (Baf60a) (D15Kz1) | 27  | 29  | 13  | 16  |
| Q8VII8 | Mineralocorticoid receptor (MR) (Nuclear receptor subfamily 3 group C member 2)                                                                                                                                             | Nr3c2 (Mlr)               | 28  | 22  | 18  | 22  |
| Q9R1P0 | Proteasome subunit alpha type-4 (EC 3.4.25.1) (Proteasome component C9) (Macropain subunit C9) (Multicatalytic endopeptidase complex subunit C9) (Proteasome subunit L)                                                     | Psma4                     | 29  | 151 | 14  | 17  |
| Q9CZY3 | Ubiquitin-conjugating enzyme E2 variant 1 (UEV-1) (CROC-1)                                                                                                                                                                  | Ube2v1 (Croc1)            | 83  | 163 | 166 | 201 |
| O08648 | Mitogen-activated protein kinase kinase kinase 4 (EC 2.7.11.25) (MAPK/ERK kinase kinase 4) (MEK kinase 4) (MEKK 4)                                                                                                          | Map3k4 (Mekk4)            | 37  | 16  | 19  | 23  |
| P49025 | Citron Rho-interacting kinase (CRIK) (EC 2.7.11.1) (Rho-interacting, serine/threonine-protein kinase 21)                                                                                                                    | Cit                       | 49  | 67  | 67  | 81  |
| P47754 | F-actin-capping protein subunit alpha-2 (CapZ alpha-2)                                                                                                                                                                      | Capza2 (Cappa2)           | 60  | 33  | 5   | 6   |
| Q9EQC4 | Elongation of very long chain fatty acids protein 4                                                                                                                                                                         | Elovl4                    | 25  | 18  | 5   | 6   |
| O35618 | Protein Mdm4 (p53-binding protein Mdm4) (Mdm2-like p53-binding protein) (Protein Mdmx) (Double minute 4 protein)                                                                                                            | Mdm4 (Mdmx)               | 17  | 29  | 5   | 6   |
| Q6PDM2 | Splicing factor, arginine/serine-rich 1 (ASF/SF2)                                                                                                                                                                           | Sfrs1                     | 24  | 91  | 5   | 6   |
| Q60848 | Lymphocyte-specific helicase (EC 3.6.1.-) (Proliferation associated SNF2-like protein)                                                                                                                                      | Hells (Lsh) (Pasg)        | 37  | 35  | 10  | 12  |

|        |                                                                                                                                                                                         |                            |     |     |     |     |
|--------|-----------------------------------------------------------------------------------------------------------------------------------------------------------------------------------------|----------------------------|-----|-----|-----|-----|
| P54227 | Stathmin (Phosphoprotein p19) (pp19) (Leukemia-associated phosphoprotein p18) (Oncoprotein 18) (Op18) (pp17) (Prosolin) (Metablastin) (Protein Pr22) (Leukemia-associated gene protein) | Stmn1 (Lag) (Lap18) (Pr22) | 121 | 120 | 10  | 12  |
| Q8BFY9 | Transportin-1 (Importin beta-2) (Karyopherin beta-2)                                                                                                                                    | Tnp1 (Kpnb2)               | 54  | 43  | 10  | 12  |
| Q9QUR6 | Prolyl endopeptidase (PE) (EC 3.4.21.26) (Post-proline cleaving enzyme)                                                                                                                 | Prep (Pep)                 | 56  | 20  | 15  | 18  |
| P80315 | T-complex protein 1 subunit delta (TCP-1-delta) (CCT-delta) (A45)                                                                                                                       | Cct4 (Cctd)                | 61  | 59  | 15  | 18  |
| O08908 | Phosphatidylinositol 3-kinase regulatory subunit beta (PI3-kinase p85 subunit beta) (PtdIns-3-kinase p85-beta)                                                                          | Pik3r2                     | 19  | 25  | 20  | 24  |
| O08810 | 116 kDa U5 small nuclear ribonucleoprotein component (U5 snRNP-specific protein, 116 kDa) (U5-116 kDa) (Elongation factor Tu GTP-binding domain-containing protein 2)                   | Eftud2 (Snrp116)           | 80  | 68  | 21  | 25  |
| Q9R0K7 | Plasma membrane calcium-transporting ATPase 2 (PMCA2) (EC 3.6.3.8) (Plasma membrane calcium ATPase isoform 2) (Plasma membrane calcium pump isoform 2)                                  | Atp2b2 (Pmca2)             | 32  | 27  | 70  | 83  |
| P54103 | DnaJ homolog subfamily C member 2 (Zuotin-related factor 1) (Mouse Id associate 1) (MIDA1)                                                                                              | Dnajc2 (Mida1) (Zrf1)      | 23  | 27  | 11  | 13  |
| P80313 | T-complex protein 1 subunit eta (TCP-1-eta) (CCT-eta)                                                                                                                                   | Cct7 (Ccth)                | 49  | 50  | 11  | 13  |
| Q8C3X4 | GTP-binding protein GUF1 homolog                                                                                                                                                        | Guf1                       | 311 | 506 | 412 | 483 |
| Q61171 | Peroxiredoxin-2 (EC 1.11.1.15) (Thioredoxin peroxidase 1) (Thioredoxin-dependent peroxide reductase 1) (Thiol-specific antioxidant protein) (TSA)                                       | Prdx2 (Tdp1) (Tpx)         | 568 | 898 | 47  | 55  |
| Q61122 | NGFI-A-binding protein 1 (EGR-1-binding protein 1)                                                                                                                                      | Nab1                       | 30  | 25  | 6   | 7   |

|        |                                                                                                                                                                                                                                                                                                                    |                                  |     |     |     |     |
|--------|--------------------------------------------------------------------------------------------------------------------------------------------------------------------------------------------------------------------------------------------------------------------------------------------------------------------|----------------------------------|-----|-----|-----|-----|
| Q6GSS7 | Histone H2A type 2-A (H2A.2) (H2a-614) (H2a-615)                                                                                                                                                                                                                                                                   | Hist2h2aa1;<br>Hist2h2aa2        | 505 | 763 | 18  | 21  |
| P49718 | DNA replication licensing factor MCM5 (CDC46 homolog) (P1-CDC46)                                                                                                                                                                                                                                                   | Mcm5 (Cdc46) (Mcmd5)             | 40  | 20  | 18  | 21  |
| P48754 | Breast cancer type 1 susceptibility protein homolog                                                                                                                                                                                                                                                                | Brca1                            | 28  | 25  | 26  | 30  |
| Q9JKP5 | Muscleblind-like protein 1 (Triplet-expansion RNA-binding protein)                                                                                                                                                                                                                                                 | Mbnl1 (Exp) (Mbnl)               | 45  | 63  | 244 | 281 |
| Q62418 | Drebrin-like protein (SH3 domain-containing protein 7) (Actin-binding protein 1)                                                                                                                                                                                                                                   | Dbnl (Abp1) (Sh3p7)              | 24  | 39  | 7   | 8   |
| Q9QWY8 | 130 kDa phosphatidylinositol 4,5-biphosphate-dependent ARF1 GTPase-activating protein (PIP2-dependent ARF1 GAP) (ADP-ribosylation factor-directed GTPase-activating protein 1) (ARF GTPase-activating protein 1) (Development and differentiation-enhancing factor 1) (Differentiation-enhancing factor 1) (DEF-1) | Ddef1 (Asap1) (Kiaa1249) (Shag1) | 26  | 23  | 14  | 16  |
| Q6A4J8 | Ubiquitin carboxyl-terminal hydrolase 7 (EC 3.1.2.15) (Ubiquitin thioesterase 7) (Ubiquitin-specific-processing protease 7) (Deubiquitinating enzyme 7) (Herpesvirus-associated ubiquitin-specific protease) (mHAUSP)                                                                                              | Usp7 (Hausp)                     | 27  | 18  | 14  | 16  |
| P97820 | Mitogen-activated protein kinase kinase kinase kinase 4 (EC 2.7.11.1) (MAPK/ERK kinase kinase kinase 4) (MEK kinase kinase 4) (MEKKK 4) (HPK/GCK-like kinase HGK) (Nck-interacting kinase)                                                                                                                         | Map4k4 (Nik)                     | 65  | 54  | 15  | 17  |
| P62270 | 40S ribosomal protein S18 (Ke-3) (Ke3)                                                                                                                                                                                                                                                                             | Rps18                            | 210 | 209 | 15  | 17  |
| P55200 | Histone-lysine N-methyltransferase HRX (EC 2.1.1.43) (Zinc finger protein HRX) (ALL-1)                                                                                                                                                                                                                             | Mll (All1) (Hrx) (Mll1)          | 67  | 26  | 39  | 44  |
| P62908 | 40S ribosomal protein S3                                                                                                                                                                                                                                                                                           | Rps3                             | 778 | 762 | 39  | 44  |



|        |                                                                                                                                                                                                                     |                                   |      |      |     |     |
|--------|---------------------------------------------------------------------------------------------------------------------------------------------------------------------------------------------------------------------|-----------------------------------|------|------|-----|-----|
| Q921M3 | Splicing factor 3B subunit 3 (Spliceosome-associated protein 130) (SAP 130) (Pre-mRNA splicing factor SF3b 130 kDa subunit) (SF3b130)                                                                               | Sf3b3 (Kiaa0017)                  | 16   | 34   | 24  | 27  |
| Q9WUF3 | CASP8-associated protein 2 (FLICE-associated huge protein)                                                                                                                                                          | Casp8ap2 (Flash)                  | 28   | 16   | 26  | 29  |
| Q64467 | Glyceraldehyde-3-phosphate dehydrogenase, testis-specific (EC 1.2.1.12) (Spermatogenic glyceraldehyde-3-phosphate dehydrogenase) (Spermatogenic cell-specific glyceraldehyde 3-phosphate dehydrogenase 2) (GAPDH-2) | Gapdhs (Gapds) (Gapds)            | 75   | 781  | 26  | 29  |
| P41230 | Histone demethylase JARID1C (EC 1.14.11.-) (Jumonji/ARID domain-containing protein 1C) (Protein SmcX) (Protein Xe169)                                                                                               | Jarid1c (Kiaa0234) (Smcx) (Xe169) | 34   | 32   | 26  | 29  |
| P26618 | Alpha-type platelet-derived growth factor receptor (EC 2.7.10.1) (PDGF-R-alpha) (CD140 antigen-like family member A) (CD antigen CD140a)                                                                            | Pdgfra                            | 37   | 73   | 160 | 178 |
| P19253 | 60S ribosomal protein L13a (Transplantation antigen P198) (Tum-P198 antigen)                                                                                                                                        | Rpl13a (P198) (Tstap198-7)        | 27   | 65   | 9   | 10  |
| P62631 | Elongation factor 1-alpha 2 (EF-1-alpha-2) (Elongation factor 1 A-2) (eEF1A-2) (Statin S1)                                                                                                                          | Eef1a2 (Eef1a1) (Stn)             | 1275 | 1549 | 258 | 285 |
| Q62446 | FK506-binding protein 3 (EC 5.2.1.8) (Peptidyl-prolyl cis-trans isomerase) (PPIase) (Rotamase) (25 kDa FKBP) (FKBP-25) (Rapamycin-selective 25 kDa immunophilin)                                                    | Fkbp3 (Fkbp25)                    | 31   | 31   | 10  | 11  |

|        |                                                                                                                                                                                                    |                                    |      |      |     |     |
|--------|----------------------------------------------------------------------------------------------------------------------------------------------------------------------------------------------------|------------------------------------|------|------|-----|-----|
| O55234 | Proteasome subunit beta type-5 (EC 3.4.25.1) (Proteasome epsilon chain) (Macropain epsilon chain) (Multicatalytic endopeptidase complex epsilon chain) (Proteasome subunit X) (Proteasome chain 6) | Psmb5                              | 168  | 227  | 10  | 11  |
| Q93092 | Transaldolase (EC 2.2.1.2)                                                                                                                                                                         | Taldo1 (Tal) (Taldo)               | 20   | 93   | 10  | 11  |
| Q9R0Q7 | Prostaglandin E synthase 3 (EC 5.3.99.3) (Cytosolic prostaglandin E2 synthase) (cPGES) (Telomerase-binding protein p23) (Hsp90 co-chaperone) (Progesterone receptor complex p23) (Sid 3177)        | Ptges3 (Sid3177) (Tebp)            | 124  | 239  | 10  | 11  |
| Q9D8N0 | Elongation factor 1-gamma (EF-1-gamma) (eEF-1B gamma)                                                                                                                                              | Eef1g                              | 31   | 85   | 11  | 12  |
| Q8VC12 | Probable urocanate hydratase (Urocanase) (EC 4.2.1.49) (Imidazolonepropionate hydrolase)                                                                                                           | Uroc1                              | 33   | 26   | 11  | 12  |
| P49717 | DNA replication licensing factor MCM4 (CDC21 homolog) (P1-CDC21)                                                                                                                                   | Mcm4 (Cdc21) (Mcmd4)               | 29   | 18   | 11  | 12  |
| Q3THS6 | S-adenosylmethionine synthetase isoform type-2 (AdoMet synthetase 2) (EC 2.5.1.6) (Methionine adenosyltransferase 2)                                                                               | Mat2a                              | 26   | 42   | 11  | 12  |
| Q99KK9 | Probable histidyl-tRNA synthetase, mitochondrial (EC 6.1.1.21) (Histidine--tRNA ligase) (HisRS) (Histidine--tRNA ligase-like)                                                                      | Hars2 (Harsl)                      | 20   | 41   | 22  | 24  |
| P27546 | Microtubule-associated protein 4 (MAP-4)                                                                                                                                                           | Map4 (Mtap4)                       | 94   | 41   | 33  | 36  |
| P07901 | Heat shock protein HSP 90-alpha (HSP 86) (Tumor-specific transplantation 86 kDa antigen) (TSTA)                                                                                                    | Hsp90aa1 (Hsp86) (Hsp86-1) (Hspca) | 1529 | 2324 | 134 | 146 |

|        |                                                                                                                                                                                                                                       |                                    |      |      |     |     |
|--------|---------------------------------------------------------------------------------------------------------------------------------------------------------------------------------------------------------------------------------------|------------------------------------|------|------|-----|-----|
| Q6P9Z1 | SWI/SNF-related matrix-associated actin-dependent regulator of chromatin subfamily D member 3 (60 kDa BRG-1/Brm-associated factor subunit C) (BRG1-associated factor 60C) (mBAF60c)                                                   | Smarcd3 (Baf60c)                   | 29   | 19   | 46  | 50  |
| P70298 | Homeobox protein cut-like 2 (Cut-like 2) (Homeobox protein Cux-2)                                                                                                                                                                     | Cux2 (Cutl2)                       | 30   | 22   | 12  | 13  |
| P38647 | Stress-70 protein, mitochondrial (75 kDa glucose-regulated protein) (GRP 75) (Heat shock 70 kDa protein 9) (Peptide-binding protein 74) (PBP74) (P66 MOT) (Mortalin)                                                                  | Hspa9 (Grp75) (Hsp74) (Hspa9a)     | 33   | 33   | 12  | 13  |
| Q8BKC5 | Importin-5 (Imp5) (Importin subunit beta-3) (Karyopherin beta-3) (Ran-binding protein 5) (RanBP5)                                                                                                                                     | Ipo5 (Kpnb3) (Ranbp5)              | 185  | 91   | 12  | 13  |
| P10126 | Elongation factor 1-alpha 1 (EF-1-alpha-1) (Elongation factor 1 A-1) (eEF1A-1) (Elongation factor Tu) (EF-Tu)                                                                                                                         | Eef1a1 (Eef1a)                     | 2004 | 2344 | 305 | 330 |
| P08113 | Endoplasmic reticulum chaperone protein (Heat shock protein 90 kDa beta member 1) (94 kDa glucose-regulated protein) (GRP94) (ERP99) (Polymorphic tumor rejection antigen 1) (Tumor rejection antigen gp96)                           | Hsp90b1 (Tra1) (Tra1)              | 221  | 298  | 25  | 27  |
| Q9Z104 | SWI/SNF-related matrix-associated actin-dependent regulator of chromatin subfamily E member 1-related (SMARCE1-related protein) (HMG box-containing protein 20B) (Structural DNA-binding protein BRAF35) (BRCA2-associated factor 35) | Hmg20b (Braf35) (Hmgx2) (Smarce1r) | 30   | 20   | 14  | 15  |
| P11984 | T-complex protein 1 subunit alpha A (TCP-1-alpha) (CCT-alpha) (Tailless complex polypeptide 1A) (TCP-1-A)                                                                                                                             | Cct1 (Ccta) (Tcp1)                 | 29   | 66   | 14  | 15  |

|        |                                                                                                                                                                                                                                                                                                                                        |                               |      |      |     |     |
|--------|----------------------------------------------------------------------------------------------------------------------------------------------------------------------------------------------------------------------------------------------------------------------------------------------------------------------------------------|-------------------------------|------|------|-----|-----|
| P70398 | Probable ubiquitin carboxyl-terminal hydrolase FAF-X (EC 3.1.2.15) (Ubiquitin thioesterase FAF-X) (Ubiquitin-specific-processing protease FAF-X) (Deubiquitinating enzyme FAF-X) (Fat facets protein-related, X-linked) (Ubiquitin-specific protease 9, X chromosome) (Ubiquitin carboxyl-terminal hydrolase FAM) (Fat facets homolog) | Usp9x (Fafl) (Fam)            | 42   | 28   | 57  | 61  |
| Q8BXX6 | Serine/threonine-protein kinase SMG1 (SMG-1) (EC 2.7.11.1)                                                                                                                                                                                                                                                                             | Smg1 (Kiaa0421)               | 33   | 27   | 30  | 32  |
| P16858 | Glyceraldehyde-3-phosphate dehydrogenase (GAPDH) (EC 1.2.1.12)                                                                                                                                                                                                                                                                         | Gapdh (Gapd)                  | 1514 | 1781 | 84  | 89  |
| Q8VI56 | Low-density lipoprotein receptor-related protein 4 (LDLR dan)                                                                                                                                                                                                                                                                          | Lrp4 (Kiaa0816)               | 77   | 30   | 19  | 20  |
| P16546 | Spectrin alpha chain, brain (Spectrin, non-erythroid alpha chain) (Alpha-II spectrin) (Fodrin alpha chain)                                                                                                                                                                                                                             | Sptan1 (Spna2) (Spta2)        | 68   | 86   | 66  | 69  |
| Q920R0 | Alsin (Amyotrophic lateral sclerosis protein 2 homolog)                                                                                                                                                                                                                                                                                | Als2                          | 74   | 88   | 72  | 75  |
| Q62504 | Msx2-interacting protein (SPEN homolog) (SMART/HDAC1-associated repressor protein)                                                                                                                                                                                                                                                     | Spn (Kiaa0929) (Mint) (Sharp) | 27   | 18   | 72  | 75  |
| O35973 | Period circadian protein homolog 1 (Circadian clock protein PERIOD 1) (Circadian pacemaker protein Rigui) (mPER1)                                                                                                                                                                                                                      | Per1 (Per) (Rigui)            | 29   | 21   | 27  | 28  |
| P62281 | 40S ribosomal protein S11                                                                                                                                                                                                                                                                                                              | Rps11                         | 166  | 132  | 27  | 28  |
| Q9JM05 | E3 SUMO-protein ligase PIAS4 (Protein inhibitor of activated STAT protein 4) (Protein inhibitor of activated STAT protein gamma) (PIAS-gamma) (PIASy)                                                                                                                                                                                  | Pias4 (Piasg)                 | 26   | 29   | 162 | 165 |
| P62141 | Serine/threonine-protein phosphatase PP1-beta catalytic subunit (PP-1B) (EC 3.1.3.16)                                                                                                                                                                                                                                                  | Ppp1cb                        | 177  | 57   | 4   | 4   |

|        |                                                                                                                                                                                                        |                                                |     |     |    |    |
|--------|--------------------------------------------------------------------------------------------------------------------------------------------------------------------------------------------------------|------------------------------------------------|-----|-----|----|----|
| P12367 | cAMP-dependent protein kinase type II-alpha regulatory subunit                                                                                                                                         | Prkar2a                                        | 33  | 23  | 5  | 5  |
| Q3TXZ1 | Zinc finger protein 575                                                                                                                                                                                | Znf575<br>(Zfp575)                             | 30  | 25  | 5  | 5  |
| Q8VCZ3 | THAP domain-containing protein 7                                                                                                                                                                       | Thap7                                          | 26  | 18  | 6  | 6  |
| O88693 | Ceramide glucosyltransferase (EC 2.4.1.80) (Glucosylceramide synthase) (GCS) (UDP-glucose:N-acylsphingosine D-glucosyltransferase) (UDP-glucose ceramide glucosyltransferase) (GLCT-1)                 | Ugcg                                           | 37  | 50  | 7  | 7  |
| Q9R1P1 | Proteasome subunit beta type-3 (EC 3.4.25.1) (Proteasome theta chain) (Proteasome chain 13) (Proteasome component C10-II)                                                                              | Psmb3                                          | 87  | 135 | 7  | 7  |
| Q8VC28 | Aldo-keto reductase family 1 member C13 (EC 1.1.1.-)                                                                                                                                                   | Akr1c13                                        | 32  | 23  | 8  | 8  |
| P30416 | FK506-binding protein 4 (EC 5.2.1.8) (Peptidyl-prolyl cis-trans isomerase) (PPIase) (Rotamase) (HSP-binding immunophilin) (HBI) (FKBP52 protein) (52 kDa FK506-binding protein) (FKBP59) (p59 protein) | Fkbp4                                          | 40  | 62  | 8  | 8  |
| Q9R190 | Metastasis-associated protein MTA2 (Metastasis-associated 1-like 1)                                                                                                                                    | Mta2 (Mta111)                                  | 27  | 26  | 9  | 9  |
| Q6P5F9 | Exportin-1 (Exp1) (Chromosome region maintenance 1 protein homolog)                                                                                                                                    | Xpo1 (Crm1)                                    | 19  | 43  | 9  | 9  |
| Q9DAI4 | Zinc finger and BTB domain-containing protein 43 (Zinc finger protein 297B)                                                                                                                            | Zbtb43<br>(Kiaa0414)<br>(Zfp297b)<br>(Znf297b) | 23  | 51  | 9  | 9  |
| Q9CQ60 | 6-phosphogluconolactonase (6PGL) (EC 3.1.1.31)                                                                                                                                                         | Pgls                                           | 148 | 41  | 11 | 11 |

|        |                                                                                                                                                                          |                                       |      |      |     |     |
|--------|--------------------------------------------------------------------------------------------------------------------------------------------------------------------------|---------------------------------------|------|------|-----|-----|
| O09061 | Proteasome subunit beta type-1 (EC 3.4.25.1) (Proteasome component C5) (Macropain subunit C5) (Multicatalytic endopeptidase complex subunit C5) (Proteasome gamma chain) | Psmb1                                 | 84   | 94   | 11  | 11  |
| Q80YV4 | Pantothenate kinase 4 (EC 2.7.1.33) (Pantothenic acid kinase 4) (mPanK4)                                                                                                 | Pank4                                 | 23   | 28   | 13  | 13  |
| Q9DB77 | Cytochrome b-c1 complex subunit 2, mitochondrial (Ubiquinol-cytochrome-c reductase complex core protein 2) (Core protein II) (Complex III subunit 2)                     | Uqcrc2                                | 29   | 20   | 13  | 13  |
| P25206 | DNA replication licensing factor MCM3 (DNA polymerase alpha holoenzyme-associated protein P1) (P1-MCM3)                                                                  | Mcm3 (Mcmd) (Mcmd3)                   | 74   | 185  | 15  | 15  |
| Q8R4K2 | Interleukin-1 receptor-associated kinase 4 (IRAK-4) (EC 2.7.11.1)                                                                                                        | Irak4                                 | 32   | 47   | 22  | 22  |
| P30681 | High mobility group protein B2 (High mobility group protein 2) (HMG-2)                                                                                                   | Hmgb2 (Hmg2)                          | 94   | 222  | 24  | 24  |
| Q80UK8 | Integrator complex subunit 2 (Int2)                                                                                                                                      | Ints2 (Kiaa1287)                      | 16   | 27   | 24  | 24  |
| Q6P8J7 | Creatine kinase, sarcomeric mitochondrial (EC 2.7.3.2) (S-MtCK)                                                                                                          | Ckmt2                                 | 50   | 66   | 26  | 26  |
| Q62261 | Spectrin beta chain, brain 1 (Spectrin, non-erythroid beta chain 1) (Beta-II spectrin) (Fodrin beta chain) (Embryonic liver fodrin)                                      | Sptbn1 (Elf) (Spnb-2) (Spnb2) (Sptb2) | 56   | 54   | 48  | 48  |
| Q8K4E0 | Alstrom syndrome protein 1 homolog                                                                                                                                       | Alms1 (Kiaa0328)                      | 29   | 30   | 86  | 86  |
| P11499 | Heat shock protein HSP 90-beta (HSP 84) (Tumor-specific transplantation 84 kDa antigen) (TSTA)                                                                           | Hsp90ab1 (Hsp84) (Hsp84-1) (Hspcb)    | 2943 | 3523 | 208 | 205 |
| P58252 | Elongation factor 2 (EF-2)                                                                                                                                               | Eef2                                  | 1630 | 1718 | 128 | 126 |

|        |                                                                                                                                                                                                              |                                        |     |     |    |    |
|--------|--------------------------------------------------------------------------------------------------------------------------------------------------------------------------------------------------------------|----------------------------------------|-----|-----|----|----|
| Q91YE5 | Bromodomain adjacent to zinc finger domain protein 2A (Transcription termination factor I-interacting protein 5) (TTF-I-interacting protein 5) (Tip5)                                                        | Baz2a (Tip5)                           | 36  | 15  | 56 | 55 |
| P23116 | Eukaryotic translation initiation factor 3 subunit A (eIF3a) (Eukaryotic translation initiation factor 3 subunit 10) (eIF-3-theta) (eIF3 p167) (eIF3 p180) (eIF3 p185) (p162) (Centrosomin)                  | Eif3a (Csma) (Eif3) (Eif3s10)          | 199 | 166 | 58 | 56 |
| Q8R4B8 | NACHT, LRR and PYD domains-containing protein 3 (Cold autoinflammatory syndrome 1 protein homolog) (Cryopyrin) (PYRIN-containing APAF1-like protein 1) (Mast cell maturation-associated-inducible protein 1) | Nlrp3 (Cias1) (Mmig1) (Nalp3) (Pypaf1) | 30  | 20  | 24 | 23 |
| P16406 | Glutamyl aminopeptidase (EC 3.4.11.7) (EAP) (Aminopeptidase A) (APA) (BP-1/6C3 antigen) (CD antigen CD249)                                                                                                   | Enpep                                  | 98  | 90  | 48 | 46 |
| Q8BGQ7 | Alanyl-tRNA synthetase, cytoplasmic (EC 6.1.1.7) (Alanine--tRNA ligase) (AlaRS)                                                                                                                              | Aars                                   | 179 | 216 | 23 | 22 |
| Q91V92 | ATP-citrate synthase (EC 2.3.3.8) (ATP-citrate (pro-S)-lyase) (Citrate cleavage enzyme)                                                                                                                      | Acly                                   | 349 | 488 | 45 | 43 |
| Q8R1B4 | Eukaryotic translation initiation factor 3 subunit C (eIF3c) (Eukaryotic translation initiation factor 3 subunit 8) (eIF3 p110)                                                                              | Eif3c (Eif3s8)                         | 34  | 63  | 22 | 21 |
| Q6ZPK0 | PHD finger protein 21A (BRAF35-HDAC complex protein BHC80) (mBHC80) (BHC80a)                                                                                                                                 | Phf21a (Bhc80) (Kiaa1696) (Pftf1)      | 28  | 37  | 20 | 19 |
| P54869 | Hydroxymethylglutaryl-CoA synthase, mitochondrial (HMG-CoA synthase) (EC 2.3.3.10) (3-hydroxy-3-methylglutaryl coenzyme A synthase)                                                                          | Hmgcs2                                 | 26  | 23  | 18 | 17 |
| P03966 | N-myc proto-oncogene protein                                                                                                                                                                                 | Mycn (Nmyc) (Nmyc1)                    | 65  | 46  | 18 | 17 |

|        |                                                                                                                                                                                                                     |                          |     |     |     |     |
|--------|---------------------------------------------------------------------------------------------------------------------------------------------------------------------------------------------------------------------|--------------------------|-----|-----|-----|-----|
| Q8BTI8 | Serine/arginine repetitive matrix protein 2                                                                                                                                                                         | Srrm2 (Kiaa0324)         | 78  | 70  | 92  | 86  |
| Q9CPR4 | 60S ribosomal protein L17                                                                                                                                                                                           | Rpl17                    | 187 | 135 | 15  | 14  |
| Q7TMY8 | E3 ubiquitin-protein ligase HUWE1 (EC 6.3.2.-) (HECT, UBA and WWE domain-containing protein 1) (Upstream regulatory element-binding protein 1) (URE-binding protein 1) (URE-B1) (E3Histone)                         | Huwe1 (Kiaa0312) (Ureb1) | 33  | 91  | 39  | 36  |
| P35969 | Vascular endothelial growth factor receptor 1 (VEGFR-1) (EC 2.7.10.1) (Tyrosine-protein kinase receptor FLT) (FLT-1) (Embryonic receptor kinase 2)                                                                  | Flt1 (Emrk2) (Flt)       | 29  | 36  | 35  | 32  |
| Q01853 | Transitional endoplasmic reticulum ATPase (TER ATPase) (15S Mg(2+)-ATPase p97 subunit) (Valosin-containing protein) (VCP)                                                                                           | Vcp                      | 691 | 699 | 56  | 51  |
| Q9WTR0 | Matrix metalloproteinase-16 (MMP-16) (EC 3.4.24.-) (Membrane-type matrix metalloproteinase 3) (MT-MMP 3) (MTMMP3) (Membrane-type-3 matrix metalloproteinase) (MT3-MMP) (MT3MMP)                                     | Mmp16                    | 17  | 36  | 11  | 10  |
| Q8CGC7 | Bifunctional aminoacyl-tRNA synthetase [Includes: Glutamyl-tRNA synthetase (EC 6.1.1.17) (Glutamate--tRNA ligase); Prolyl-tRNA synthetase (EC 6.1.1.15) (Proline--tRNA ligase)]                                     | Eprs (Qprs)              | 130 | 102 | 32  | 29  |
| Q8VDD5 | Myosin-9 (Myosin heavy chain 9) (Myosin heavy chain, non-muscle IIa) (Non-muscle myosin heavy chain IIa) (NMMHC II-a) (NMMHC-IIA) (Cellular myosin heavy chain, type A) (Non-muscle myosin heavy chain-A) (NMMHC-A) | Myh9                     | 780 | 839 | 127 | 115 |
| P07310 | Creatine kinase M-type (EC 2.7.3.2) (Creatine kinase M chain) (M-CK)                                                                                                                                                | Ckm (Ckmm)               | 73  | 107 | 31  | 28  |
| Q9QZH3 | Peptidyl-prolyl cis-trans isomerase E (PPIase E) (Rotamase E) (EC 5.2.1.8) (Cyclophilin E) (Cyclophilin-33)                                                                                                         | Ppie (Cyp33)             | 28  | 35  | 10  | 9   |



|        |                                                                                                                                                                 |                                             |     |      |    |    |
|--------|-----------------------------------------------------------------------------------------------------------------------------------------------------------------|---------------------------------------------|-----|------|----|----|
| Q925Q8 | Dachshund homolog 2 (Dach2)                                                                                                                                     | Dach2                                       | 22  | 30   | 9  | 8  |
| P43277 | Histone H1.3 (H1 VAR.4) (H1d)                                                                                                                                   | Hist1h1d<br>(H1f3)                          | 78  | 99   | 18 | 16 |
| Q99104 | Myosin-Va (Dilute myosin heavy chain, non-muscle)                                                                                                               | Myo5a (Dilute)                              | 28  | 34   | 35 | 31 |
| Q9DBJ1 | Phosphoglycerate mutase 1 (EC 5.4.2.1) (EC 5.4.2.4) (EC 3.1.3.13) (Phosphoglycerate mutase isozyme B) (PGAM-B) (BPG-dependent PGAM 1)                           | Pgam1                                       | 612 | 746  | 35 | 31 |
| Q8BG95 | Protein phosphatase 1 regulatory subunit 12B (Myosin phosphatase-targeting subunit 2)                                                                           | Ppp1r12b<br>(Mypt2)                         | 25  | 24   | 25 | 22 |
| Q9R0P5 | Destrin (Actin-depolymerizing factor) (ADF) (Sid 23)                                                                                                            | Dstn (Dsn)<br>(Sid23)                       | 61  | 81   | 8  | 7  |
| P70195 | Proteasome subunit beta type-7 (EC 3.4.25.1) (Proteasome subunit Z) (Macropain chain Z) (Multicatalytic endopeptidase complex chain Z)                          | Psmb7<br>(Mmc14)                            | 39  | 40   | 8  | 7  |
| Q02053 | Ubiquitin-like modifier-activating enzyme 1 (Ubiquitin-activating enzyme E1) (Ubiquitin-like modifier-activating enzyme 1 X) (Ubiquitin-activating enzyme E1 X) | Uba1 (Sbx)<br>(Ube1)<br>(Ube1ax)<br>(Ube1x) | 660 | 1086 | 63 | 55 |
| Q8VHE6 | Dynein heavy chain 5, axonemal (Axonemal beta dynein heavy chain 5) (Mdnah5) (Ciliary dynein heavy chain 5)                                                     | Dnah5<br>(Dnahc5)                           | 47  | 44   | 83 | 72 |
| Q924C1 | Exportin-5 (Exp5) (Ran-binding protein 21)                                                                                                                      | Xpo5<br>(Kiaa1291)<br>(Ranbp21)             | 20  | 62   | 15 | 13 |
| P21550 | Beta-enolase (EC 4.2.1.11) (2-phospho-D-glycerate hydro-lyase) (Muscle-specific enolase) (MSE) (Skeletal muscle enolase) (Enolase 3)                            | Eno3 (Eno-3)                                | 313 | 146  | 30 | 26 |
| Q11011 | Puromycin-sensitive aminopeptidase (PSA) (EC 3.4.11.-)                                                                                                          | Npepps (Psa)                                | 71  | 141  | 30 | 26 |
| Q9Z1Q9 | Valyl-tRNA synthetase (EC 6.1.1.9) (Valine--tRNA ligase) (ValRS) (Protein G7a)                                                                                  | Vars (Bat6)<br>(G7a) (Vars2)                | 380 | 302  | 37 | 32 |

|        |                                                                                                                                                                                                             |                       |     |     |    |    |
|--------|-------------------------------------------------------------------------------------------------------------------------------------------------------------------------------------------------------------|-----------------------|-----|-----|----|----|
| Q9JJK8 | Serine/threonine-protein kinase ATR (EC 2.7.11.1) (Ataxia telangiectasia and Rad3-related protein)                                                                                                          | Atr                   | 20  | 25  | 72 | 62 |
| Q9D868 | Peptidyl-prolyl cis-trans isomerase H (PPIase H) (Rotamase H) (EC 5.2.1.8)                                                                                                                                  | Ppih                  | 55  | 31  | 7  | 6  |
| P67984 | 60S ribosomal protein L22 (Heparin-binding protein HBp15)                                                                                                                                                   | Rpl22                 | 59  | 48  | 7  | 6  |
| O88866 | Hormonally up-regulated neu tumor-associated kinase (EC 2.7.11.1) (Serine/threonine-protein kinase MAK-V)                                                                                                   | Hunk (Makv)           | 27  | 21  | 14 | 12 |
| P35979 | 60S ribosomal protein L12                                                                                                                                                                                   | Rpl12                 | 208 | 389 | 14 | 12 |
| P97784 | Cryptochrome-1                                                                                                                                                                                              | Cry1                  | 52  | 42  | 21 | 18 |
| Q9R194 | Cryptochrome-2                                                                                                                                                                                              | Cry2 (Kiaa0658)       | 52  | 42  | 21 | 18 |
| Q9CZM2 | 60S ribosomal protein L15                                                                                                                                                                                   | Rpl15                 | 225 | 107 | 21 | 18 |
| Q6ZWN5 | 40S ribosomal protein S9                                                                                                                                                                                    | Rps9                  | 459 | 248 | 47 | 40 |
| Q9JM52 | Misshapen-like kinase 1 (EC 2.7.11.1) (Mitogen-activated protein kinase kinase kinase 6) (MAPK/ERK kinase kinase 6) (MEK kinase kinase 6) (MEKKK 6) (Misshapen/NIK-related kinase) (GCK family kinase MiNK) | Mink1 (Map4k6) (Mink) | 18  | 54  | 13 | 11 |
| Q9CQN1 | Heat shock protein 75 kDa, mitochondrial (HSP 75) (Tumor necrosis factor type 1 receptor-associated protein) (TRAP-1) (TNFR-associated protein 1)                                                           | Trap1 (Hsp75)         | 197 | 335 | 13 | 11 |
| P14131 | 40S ribosomal protein S16                                                                                                                                                                                   | Rps16                 | 160 | 126 | 19 | 16 |
| P20029 | 78 kDa glucose-regulated protein (GRP 78) (Heat shock 70 kDa protein 5) (Immunoglobulin heavy chain-binding protein) (BiP)                                                                                  | Hspa5 (Grp78)         | 262 | 312 | 25 | 21 |
| P46664 | Adenylosuccinate synthetase isozyme 2 (AMPSase 2) (AdSS 2) (EC 6.3.4.4) (Adenylosuccinate synthetase, non-muscle isozyme) (Adenylosuccinate synthetase, acidic isozyme) (IMP--aspartate ligase 2)           | Adss (Adss2)          | 36  | 66  | 12 | 10 |

|        |                                                                                                                                                                                                                                                                                                                                                                                                                                                                         |                             |      |      |     |     |
|--------|-------------------------------------------------------------------------------------------------------------------------------------------------------------------------------------------------------------------------------------------------------------------------------------------------------------------------------------------------------------------------------------------------------------------------------------------------------------------------|-----------------------------|------|------|-----|-----|
| Q99PP7 | E3 ubiquitin-protein ligase TRIM33 (EC 6.3.2.-) (Tripartite motif-containing protein 33) (Transcription intermediary factor 1-gamma) (TIF1-gamma) (Ectodermin homolog)                                                                                                                                                                                                                                                                                                  | Trim33 (Kiaa1113)           | 33   | 25   | 12  | 10  |
| Q05816 | Fatty acid-binding protein, epidermal (E-FABP) (Fatty acid-binding protein 5) (Psoriasis-associated fatty acid-binding protein homolog) (PA-FABP) (Keratinocyte lipid-binding protein)                                                                                                                                                                                                                                                                                  | Fabp5 (Fabpe) (Klbp) (Mal1) | 331  | 206  | 18  | 15  |
| P11983 | T-complex protein 1 subunit alpha B (TCP-1-alpha) (CCT-alpha) (Tailless complex polypeptide 1B) (TCP-1-B)                                                                                                                                                                                                                                                                                                                                                               | Cct1 (Ccta) (Tcp1)          | 29   | 66   | 18  | 15  |
| Q64514 | Tripeptidyl-peptidase 2 (EC 3.4.14.10) (Tripeptidyl-peptidase II) (TPP-II) (Tripeptidyl aminopeptidase)                                                                                                                                                                                                                                                                                                                                                                 | Tpp2                        | 54   | 76   | 24  | 20  |
| P20357 | Microtubule-associated protein 2 (MAP-2)                                                                                                                                                                                                                                                                                                                                                                                                                                | Map2 (Mtap2)                | 50   | 22   | 30  | 25  |
| P11531 | Dystrophin                                                                                                                                                                                                                                                                                                                                                                                                                                                              | Dmd                         | 25   | 16   | 66  | 55  |
| Q91XQ0 | Dynein heavy chain 8, axonemal (Axonemal beta dynein heavy chain 8) (Ciliary dynein heavy chain 8)                                                                                                                                                                                                                                                                                                                                                                      | Dnahc8                      | 47   | 51   | 77  | 64  |
| P19096 | Fatty acid synthase (EC 2.3.1.85) [Includes: [Acyl-carrier-protein] S-acetyltransferase (EC 2.3.1.38); [Acyl-carrier-protein] S-malonyltransferase (EC 2.3.1.39); 3-oxoacyl-[acyl-carrier-protein] synthase (EC 2.3.1.41); 3-oxoacyl-[acyl-carrier-protein] reductase (EC 1.1.1.100); 3-hydroxypalmitoyl-[acyl-carrier-protein] dehydratase (EC 4.2.1.61); Enoyl-[acyl-carrier-protein] reductase (EC 1.3.1.10); Oleoyl [acyl-carrier-protein] hydrolase (EC 3.1.2.14)] | Fasn                        | 1869 | 1524 | 163 | 135 |

|        |                                                                                                                                                                                                                                                                |                               |     |     |    |    |
|--------|----------------------------------------------------------------------------------------------------------------------------------------------------------------------------------------------------------------------------------------------------------------|-------------------------------|-----|-----|----|----|
| Q8R429 | Sarcoplasmic/endoplasmic reticulum calcium ATPase 1 (SERCA1) (EC 3.6.3.8) (Calcium pump 1) (Calcium-transporting ATPase sarcoplasmic reticulum type, fast twitch skeletal muscle isoform) (SR Ca(2+)-ATPase 1) (Endoplasmic reticulum class 1/2 Ca(2+) ATPase) | Atp2a1                        | 25  | 17  | 17 | 14 |
| P80316 | T-complex protein 1 subunit epsilon (TCP-1-epsilon) (CCT-epsilon)                                                                                                                                                                                              | Cct5 (Ccte) (Kiaa0098)        | 239 | 102 | 17 | 14 |
| Q6DFV7 | Nuclear receptor coactivator 7                                                                                                                                                                                                                                 | Ncoa7                         | 25  | 16  | 11 | 9  |
| P14206 | 40S ribosomal protein SA (Laminin receptor 1) (p40) (34/67 kDa laminin receptor) (37 kDa oncofetal antigen) (OFA/iLRP)                                                                                                                                         | Rpsa (Lamr1) (P40-8)          | 131 | 112 | 11 | 9  |
| Q6ZQ38 | Cullin-associated NEDD8-dissociated protein 1 (Cullin-associated and neddylation-dissociated protein 1) (p120 CAND1)                                                                                                                                           | Cand1 (D10Erd516e) (Kiaa0829) | 221 | 246 | 33 | 27 |
| P42227 | Signal transducer and activator of transcription 3 (Acute-phase response factor)                                                                                                                                                                               | Stat3 (Aprf)                  | 16  | 28  | 33 | 27 |
| Q569Z5 | Probable ATP-dependent RNA helicase DDX46 (EC 3.6.1.-) (DEAD box protein 46)                                                                                                                                                                                   | Ddx46 (Kiaa0801)              | 25  | 17  | 21 | 17 |
| Q80ZW0 | Serine/threonine-protein kinase 35 (EC 2.7.11.1)                                                                                                                                                                                                               | Stk35                         | 14  | 50  | 21 | 17 |
| Q64512 | Tyrosine-protein phosphatase non-receptor type 13 (EC 3.1.3.48) (Protein tyrosine phosphatase PTP-BL) (Protein-tyrosine phosphatase RIP) (Protein tyrosine phosphatase DPZPTP) (PTP36)                                                                         | Ptpn13 (Ptp14)                | 28  | 27  | 26 | 21 |
| Q62407 | Striated muscle-specific serine/threonine protein kinase (EC 2.7.11.1) (Aortic preferentially expressed protein 1) (APEG-1)                                                                                                                                    | Speg (Apeg1) (Kiaa1297)       | 26  | 20  | 31 | 25 |
| P17182 | Alpha-enolase (EC 4.2.1.11) (2-phospho-D-glycerate hydro-lyase) (Non-neural enolase) (NNE) (Enolase 1)                                                                                                                                                         | Eno1 (Eno-1)                  | 976 | 802 | 62 | 50 |

|        |                                                                                                                                                 |                                        |     |     |     |     |
|--------|-------------------------------------------------------------------------------------------------------------------------------------------------|----------------------------------------|-----|-----|-----|-----|
| P54923 | [Protein ADP-ribosylarginine] hydrolase (ADP-ribosylarginine hydrolase) (EC 3.2.2.19) (ADP-ribose-L-arginine cleaving enzyme)                   | Adprh (Arh1)                           | 20  | 41  | 15  | 12  |
| P00342 | L-lactate dehydrogenase C chain (LDH-C) (EC 1.1.1.27) (LDH testis subunit) (LDH-X)                                                              | Ldhc (Ldh-3) (Ldh3)                    | 97  | 122 | 15  | 12  |
| Q9Z2U0 | Proteasome subunit alpha type-7 (EC 3.4.25.1) (Proteasome subunit RC6-1)                                                                        | Psm7                                   | 121 | 253 | 15  | 12  |
| P12970 | 60S ribosomal protein L7a (Surfeit locus protein 3)                                                                                             | Rpl7a (Surf-3) (Surf3)                 | 111 | 31  | 15  | 12  |
| Q99MD9 | Nuclear autoantigenic sperm protein (NASP)                                                                                                      | Nasp                                   | 365 | 293 | 34  | 27  |
| Q8BP67 | 60S ribosomal protein L24                                                                                                                       | Rpl24                                  | 354 | 214 | 24  | 19  |
| Q8C196 | Carbamoyl-phosphate synthase [ammonia], mitochondrial (EC 6.3.4.16) (Carbamoyl-phosphate synthetase I) (CPSase I)                               | Cps1                                   | 22  | 25  | 19  | 15  |
| Q80Z16 | E3 ubiquitin-protein ligase LRSAM1 (EC 6.3.2.-) (Leucine-rich repeat and sterile alpha motif-containing protein 1) (Tsg101-associated ligase)   | Lrsam1                                 | 19  | 35  | 19  | 15  |
| Q80UN9 | tRNA isopentenyltransferase, mitochondrial (IPTase) (EC 2.5.1.8) (Isopentenyl-diphosphate:tRNA isopentenyltransferase) (IPP transferase) (IPPT) | Trit1 (lpt)                            | 31  | 24  | 19  | 15  |
| P62754 | 40S ribosomal protein S6 (Phosphoprotein NP33)                                                                                                  | Rps6                                   | 127 | 283 | 19  | 15  |
| Q9QWL7 | Keratin, type I cytoskeletal 17 (Cytokeratin-17) (CK-17) (Keratin-17) (K17)                                                                     | Krt17 (Krt1-17)                        | 38  | 46  | 14  | 11  |
| Q9JHU4 | Cytoplasmic dynein 1 heavy chain 1 (Cytoplasmic dynein heavy chain 1) (Dynein heavy chain, cytosolic)                                           | Dync1h1 (Dhc1) (Dnch1) (Dnchc1) (Dyhc) | 822 | 395 | 157 | 123 |
| Q6A078 | Centrosomal protein of 290 kDa (Cep290) (Nephrocystin-6)                                                                                        | Cep290 (Kiaa0373) (Nphp6)              | 32  | 57  | 85  | 66  |

|        |                                                                                                                                                                                                                                        |                               |      |     |    |    |
|--------|----------------------------------------------------------------------------------------------------------------------------------------------------------------------------------------------------------------------------------------|-------------------------------|------|-----|----|----|
| P31254 | Ubiquitin-like modifier-activating enzyme 1 Y (Ubiquitin-activating enzyme E1 Y) (Ubiquitin-activating enzyme E1)                                                                                                                      | Ube1ay (Sby) (Ube1y) (Ube1y1) | 161  | 77  | 22 | 17 |
| P06151 | L-lactate dehydrogenase A chain (LDH-A) (EC 1.1.1.27) (LDH muscle subunit) (LDH-M)                                                                                                                                                     | Ldha (Ldh-1) (Ldh1)           | 1033 | 421 | 74 | 57 |
| Q9CZW4 | Long-chain-fatty-acid--CoA ligase 3 (EC 6.2.1.3) (Long-chain acyl-CoA synthetase 3) (LACS 3)                                                                                                                                           | Acs13 (Acs3) (Fac13)          | 41   | 37  | 13 | 10 |
| P05063 | Fructose-bisphosphate aldolase C (EC 4.1.2.13) (Brain-type aldolase) (Aldolase 3) (Zebrin II) (Scrapie-responsive protein 2)                                                                                                           | Aldoc (Aldo3) (Scrg2)         | 35   | 51  | 13 | 10 |
| Q8CGK3 | Lon protease homolog, mitochondrial (EC 3.4.21.-) (Lon protease-like protein) (LONP) (Mitochondrial ATP-dependent protease Lon) (Serine protease 15)                                                                                   | Lonp1 (Prss15)                | 21   | 30  | 43 | 33 |
| P62702 | 40S ribosomal protein S4, X isoform                                                                                                                                                                                                    | Rps4x (Rps4)                  | 402  | 304 | 30 | 23 |
| Q8JZQ2 | AFG3-like protein 2 (EC 3.4.24.-)                                                                                                                                                                                                      | Afg3l2                        | 15   | 27  | 17 | 13 |
| P47856 | Glucosamine--fructose-6-phosphate aminotransferase [isomerizing] 1 (EC 2.6.1.16) (Glutamine:fructose 6 phosphate amidotransferase 1) (GFAT 1) (GFAT1) (D-fructose-6-phosphate amidotransferase 1) (Hexosephosphate aminotransferase 1) | Gfpt1 (Gfpt)                  | 17   | 29  | 17 | 13 |
| Q569Z6 | Thyroid hormone receptor-associated protein 3 (Thyroid hormone receptor-associated protein complex 150 kDa component) (Trap150)                                                                                                        | Thrap3 (Trap150)              | 29   | 48  | 21 | 16 |
| Q99MY8 | Probable histone-lysine N-methyltransferase ASH1L (EC 2.1.1.43) (Absent small and homeotic disks protein 1 homolog) (ASH1-like protein)                                                                                                | Ash1l                         | 19   | 31  | 46 | 35 |
| P70670 | Nascent polypeptide-associated complex subunit alpha, muscle-specific form (Alpha-NAC, muscle-specific form)                                                                                                                           | Naca (Gm1878)                 | 22   | 130 | 29 | 22 |

|        |                                                                                                                                                                                                                            |                                       |     |     |    |    |
|--------|----------------------------------------------------------------------------------------------------------------------------------------------------------------------------------------------------------------------------|---------------------------------------|-----|-----|----|----|
| P16627 | Heat shock 70 kDa protein 1L (Heat shock 70 kDa protein 1-like) (Heat shock 70 kDa-like protein 1) (Spermatid-specific heat shock protein 70)                                                                              | Hspa1l (Hsc70t)                       | 319 | 238 | 33 | 25 |
| P56480 | ATP synthase subunit beta, mitochondrial (EC 3.6.3.14)                                                                                                                                                                     | Atp5b                                 | 31  | 50  | 8  | 6  |
| Q02956 | Protein kinase C zeta type (EC 2.7.11.13) (nPKC-zeta)                                                                                                                                                                      | Prkcz (PkcZ)                          | 29  | 15  | 8  | 6  |
| Q9DBP5 | UMP-CMP kinase (EC 2.7.4.14) (Cytidylate kinase) (Deoxycytidylate kinase) (Cytidine monophosphate kinase) (Uridine monophosphate kinase) (Uridine monophosphate/cytidine monophosphate kinase) (UMP/CMP kinase) (UMP/CMPK) | Cmpk1 (Cmk) (Cmpk) (Uck) (Umk) (Umpk) | 107 | 93  | 12 | 9  |
| P25233 | Necdin                                                                                                                                                                                                                     | Ndn                                   | 30  | 23  | 16 | 12 |
| P62751 | 60S ribosomal protein L23a                                                                                                                                                                                                 | Rpl23a                                | 75  | 49  | 16 | 12 |
| Q8K045 | Serine/threonine-protein kinase N3 (EC 2.7.11.13) (Protein kinase PKN-beta) (Protein-kinase C-related kinase 3)                                                                                                            | Pkn3 (Pknbeta)                        | 130 | 126 | 36 | 27 |
| Q6P3Y5 | Zinc finger protein 280C (Suppressor of hairy wing homolog 3)                                                                                                                                                              | Znf280c (Kiaa1584) (Suhw3) (Zfp280c)  | 87  | 142 | 43 | 32 |
| P58681 | Toll-like receptor 7                                                                                                                                                                                                       | Tlr7                                  | 27  | 33  | 23 | 17 |
| P62264 | 40S ribosomal protein S14                                                                                                                                                                                                  | Rps14                                 | 163 | 166 | 15 | 11 |
| P25444 | 40S ribosomal protein S2 (S4) (LLRep3 protein)                                                                                                                                                                             | Rps2 (Llrep3) (Rps4)                  | 217 | 50  | 26 | 19 |
| Q61656 | Probable ATP-dependent RNA helicase DDX5 (EC 3.6.1.-) (DEAD box protein 5) (RNA helicase p68) (DEAD box RNA helicase DEAD1) (mDEAD1)                                                                                       | Ddx5 (Tnz2)                           | 90  | 43  | 11 | 8  |

|        |                                                                                                                               |                                                                  |     |     |    |    |
|--------|-------------------------------------------------------------------------------------------------------------------------------|------------------------------------------------------------------|-----|-----|----|----|
| P62991 | Ubiquitin                                                                                                                     | Rps27a<br>(Uba80)<br>(Ubcep1);<br>Uba52<br>(Ubcep2);<br>Ubb; Ubc | 61  | 54  | 11 | 8  |
| Q61696 | Heat shock 70 kDa protein 1A (Heat shock 70 kDa protein 3) (HSP70.3) (Hsp68)                                                  | Hspa1a<br>(Hsp70-3)<br>(Hsp70A1)                                 | 266 | 236 | 33 | 24 |
| Q9CR57 | 60S ribosomal protein L14                                                                                                     | Rpl14                                                            | 508 | 391 | 33 | 24 |
| Q61699 | Heat shock protein 105 kDa (Heat shock-related 100 kDa protein E7I) (HSP-E7I) (Heat shock 110 kDa protein) (42 degrees C-HSP) | Hsph1<br>(Hsp105)<br>(Hsp110)<br>(Kiaa0201)                      | 46  | 48  | 18 | 13 |
| P27659 | 60S ribosomal protein L3 (J1 protein)                                                                                         | Rpl3                                                             | 192 | 75  | 25 | 18 |
| Q64237 | Dopamine beta-hydroxylase (EC 1.14.17.1) (Dopamine beta-monooxygenase) [Cleaved into: Soluble dopamine beta-hydroxylase]      | Dbh                                                              | 44  | 23  | 7  | 5  |
| Q9CQ65 | S-methyl-5'-thioadenosine phosphorylase (EC 2.4.2.28) (5'-methylthioadenosine phosphorylase) (MTA phosphorylase) (MTAPase)    | Mtap                                                             | 48  | 36  | 7  | 5  |
| Q99LG2 | Transportin-2 (Karyopherin beta-2b)                                                                                           | Tnpo2                                                            | 42  | 32  | 7  | 5  |
| Q60673 | Receptor-type tyrosine-protein phosphatase-like N (R-PTP-N) (PTP IA-2)                                                        | Ptprn (Ptp35)                                                    | 30  | 18  | 14 | 10 |
| P14148 | 60S ribosomal protein L7                                                                                                      | Rpl7                                                             | 145 | 52  | 14 | 10 |
| Q03172 | Zinc finger protein 40 (Transcription factor alphaA-CRYBP1) (Alpha A-crystallin-binding protein I) (Alpha A-CRYBP1)           | Hivep1<br>(Cryabp1)<br>(Znf40)                                   | 25  | 24  | 21 | 15 |
| P14869 | 60S acidic ribosomal protein P0 (L10E)                                                                                        | Rplp0 (Arbp)                                                     | 115 | 334 | 28 | 20 |
| P17751 | Triosephosphate isomerase (TIM) (EC 5.3.1.1) (Triose-phosphate isomerase)                                                     | Tpi1 (Tpi)                                                       | 706 | 519 | 35 | 25 |



|        |                                                                                                                                                                                                                               |                              |      |     |    |    |
|--------|-------------------------------------------------------------------------------------------------------------------------------------------------------------------------------------------------------------------------------|------------------------------|------|-----|----|----|
| Q920E5 | Farnesyl pyrophosphate synthetase (FPP synthetase) (FPS) (Farnesyl diphosphate synthetase) (Cholesterol-regulated 39 kDa protein) (CR 39) [Includes: Dimethylallyltransferase (EC 2.5.1.1); Geranyltransferase (EC 2.5.1.10)] | Fdps                         | 107  | 43  | 17 | 12 |
| Q60692 | Proteasome subunit beta type-6 (EC 3.4.25.1) (Proteasome delta chain) (Macropain delta chain) (Multicatalytic endopeptidase complex delta chain) (Proteasome subunit Y)                                                       | Psm6 (Lmp19)                 | 33   | 89  | 17 | 12 |
| P51410 | 60S ribosomal protein L9                                                                                                                                                                                                      | Rpl9                         | 187  | 212 | 17 | 12 |
| Q8BMJ2 | Leucyl-tRNA synthetase, cytoplasmic (EC 6.1.1.4) (Leucine--tRNA ligase) (LeuRS)                                                                                                                                               | Lars                         | 52   | 45  | 47 | 33 |
| Q7TQI3 | Ubiquitin thioesterase OTUB1 (EC 3.1.2.-) (Otubain-1) (OTU domain-containing ubiquitin aldehyde-binding protein 1) (Ubiquitin-specific-processing protease OTUB1) (Deubiquitinating enzyme OTUB1)                             | Otub1                        | 152  | 109 | 10 | 7  |
| Q91YJ5 | Translation initiation factor IF-2, mitochondrial (IF-2Mt) (IF2(mt)) (IF-2(Mt))                                                                                                                                               | Mtif2                        | 29   | 23  | 13 | 9  |
| Q52KI8 | Serine/arginine repetitive matrix protein 1 (Plenty-of-prolines 101)                                                                                                                                                          | Srrm1 (Pop101)               | 22   | 73  | 29 | 20 |
| Q99PV0 | Pre-mRNA-processing-splicing factor 8 (Splicing factor Prp8)                                                                                                                                                                  | Prpf8 (Prp8)                 | 28   | 29  | 51 | 35 |
| Q9CWF2 | Tubulin beta-2B chain                                                                                                                                                                                                         | Tubb2b                       | 1435 | 825 | 86 | 59 |
| P99024 | Tubulin beta-5 chain                                                                                                                                                                                                          | Tubb5                        | 1377 | 976 | 88 | 60 |
| Q80TP3 | E3 ubiquitin-protein ligase UBR5 (EC 6.3.2.-) (E3 ubiquitin-protein ligase, HECT domain-containing 1) (Hyperplastic discs protein homolog)                                                                                    | Ubr5 (Edd) (Edd1) (Kiaa0896) | 27   | 17  | 43 | 29 |
| Q6PHN9 | Ras-related protein Rab-35                                                                                                                                                                                                    | Rab35                        | 17   | 59  | 3  | 2  |

|        |                                                                                                                                                                               |                       |      |     |    |    |
|--------|-------------------------------------------------------------------------------------------------------------------------------------------------------------------------------|-----------------------|------|-----|----|----|
| Q8C9S8 | Cysteine protease ATG4A (EC 3.4.22.-) (Autophagy-related protein 4 homolog A) (Autophagin-2) (Autophagy-related cysteine endopeptidase 2) (AUT-like 2 cysteine endopeptidase) | Atg4a (Apg4a) (Autl2) | 26   | 21  | 6  | 4  |
| Q99LD8 | N(G),N(G)-dimethylarginine dimethylaminohydrolase 2 (Dimethylarginine dimethylaminohydrolase 2) (DDAH-2) (EC 3.5.3.18) (DDAHII) (Dimethylargininase-2)                        | Ddah2                 | 103  | 92  | 9  | 6  |
| P43275 | Histone H1.1 (H1 VAR.3) (H1a)                                                                                                                                                 | Hist1h1a (H1f1)       | 28   | 90  | 9  | 6  |
| Q9WV07 | Epidermis-type lipoxygenase 3 (e-LOX-3) (EC 1.13.11.-)                                                                                                                        | Aloxe3                | 25   | 22  | 9  | 6  |
| P61979 | Heterogeneous nuclear ribonucleoprotein K (hnRNP K)                                                                                                                           | Hnrnpk (Hnrpk)        | 225  | 46  | 18 | 12 |
| Q8K4L3 | Supervillin (Archvillin) (p205/p250)                                                                                                                                          | Svil                  | 25   | 22  | 18 | 12 |
| O88444 | Adenylate cyclase type 1 (EC 4.6.1.1) (Adenylate cyclase type I) (ATP pyrophosphate-lyase 1) (Adenylyl cyclase 1) (Ca(2+)/calmodulin-activated adenylyl cyclase)              | Adcy1                 | 33   | 31  | 26 | 17 |
| P68372 | Tubulin beta-2C chain                                                                                                                                                         | Tubb2c                | 1300 | 891 | 78 | 51 |
| P42932 | T-complex protein 1 subunit theta (TCP-1-theta) (CCT-theta)                                                                                                                   | Cct8 (Cctq)           | 197  | 57  | 23 | 15 |
| Q924W6 | Tripartite motif-containing protein 66 (Transcriptional intermediary factor 1 delta)                                                                                          | Trim66 (Tif1d)        | 28   | 18  | 23 | 15 |
| O70435 | Proteasome subunit alpha type-3 (EC 3.4.25.1) (Proteasome component C8) (Macropain subunit C8) (Multicatalytic endopeptidase complex subunit C8) (Proteasome subunit K)       | Psma3                 | 95   | 76  | 14 | 9  |
| Q9CXW4 | 60S ribosomal protein L11                                                                                                                                                     | Rpl11                 | 72   | 79  | 11 | 7  |

|        |                                                                                                                                                                                                                                                                                                        |                              |      |     |    |    |
|--------|--------------------------------------------------------------------------------------------------------------------------------------------------------------------------------------------------------------------------------------------------------------------------------------------------------|------------------------------|------|-----|----|----|
| Q8CG48 | Structural maintenance of chromosomes protein 2 (Chromosome-associated protein E) (XCAP-E homolog) (FGF-inducible protein 16)                                                                                                                                                                          | Smc2 (Cape) (Fin16) (Smc2l1) | 32   | 36  | 41 | 26 |
| Q7TMM9 | Tubulin beta-2A chain                                                                                                                                                                                                                                                                                  | Tubb2a (Tubb2)               | 1422 | 775 | 83 | 52 |
| Q61983 | Sodium-dependent phosphate transport protein 1 (Sodium/phosphate cotransporter 1) (Na(+)/PI cotransporter 1) (Solute carrier family 17 member 1) (Renal sodium-dependent phosphate transport protein 1) (Renal sodium-phosphate transport protein 1) (Renal Na(+)-dependent phosphate cotransporter 1) | Slc17a1 (Npt1)               | 31   | 33  | 8  | 5  |
| Q9QZ09 | Putative homeodomain transcription factor 1                                                                                                                                                                                                                                                            | Phtf1 (Phtf)                 | 29   | 24  | 8  | 5  |
| Q80U87 | Ubiquitin carboxyl-terminal hydrolase 8 (EC 3.1.2.15) (Ubiquitin thioesterase 8) (Ubiquitin-specific-processing protease 8) (Deubiquitinating enzyme 8) (mUBPy)                                                                                                                                        | Usp8 (Kiaa0055) (Ubpy)       | 29   | 23  | 24 | 15 |
| P62717 | 60S ribosomal protein L18a                                                                                                                                                                                                                                                                             | Rpl18a                       | 242  | 62  | 21 | 13 |
| P16125 | L-lactate dehydrogenase B chain (LDH-B) (EC 1.1.1.27) (LDH heart subunit) (LDH-H)                                                                                                                                                                                                                      | Ldhb (Ldh-2) (Ldh2)          | 315  | 214 | 34 | 21 |
| P17156 | Heat shock-related 70 kDa protein 2 (Heat shock protein 70.2)                                                                                                                                                                                                                                          | Hspa2 (Hcp70.2) (Hsp70-2)    | 964  | 544 | 60 | 37 |
| P84099 | 60S ribosomal protein L19                                                                                                                                                                                                                                                                              | Rpl19                        | 39   | 47  | 13 | 8  |
| P62301 | 40S ribosomal protein S13                                                                                                                                                                                                                                                                              | Rps13                        | 77   | 100 | 23 | 14 |
| O88291 | Zinc finger protein 326 (Zinc finger protein-associated with nuclear matrix of 75 kDa)                                                                                                                                                                                                                 | Znf326 (Zan75) (Zfp326)      | 41   | 55  | 5  | 3  |
| Q9D1R9 | 60S ribosomal protein L34                                                                                                                                                                                                                                                                              | Rpl34                        | 34   | 32  | 10 | 6  |

|        |                                                                                                                                                                                                                               |                             |      |     |     |    |
|--------|-------------------------------------------------------------------------------------------------------------------------------------------------------------------------------------------------------------------------------|-----------------------------|------|-----|-----|----|
| Q9EQZ6 | Rap guanine nucleotide exchange factor 4 (cAMP-regulated guanine nucleotide exchange factor II) (cAMP-GEFII) (Exchange factor directly activated by cAMP 2) (Epac 2) (cAMP-dependent Rap1 guanine-nucleotide exchange factor) | Rapgef4 (Cgef2) (Epac2)     | 47   | 23  | 20  | 12 |
| Q8R4K8 | Pappalysin-1 (EC 3.4.24.79) (Pregnancy-associated plasma protein A) (PAPP-A) (Insulin-like growth factor-dependent IGF-binding protein 4 protease) (IGF-dependent IGFBP-4 protease) (IGFBP-4ase)                              | Pappa                       | 41   | 43  | 25  | 15 |
| Q6NZJ6 | Eukaryotic translation initiation factor 4 gamma 1 (eIF-4-gamma 1) (eIF-4G 1) (eIF-4G1)                                                                                                                                       | Eif4g1                      | 47   | 113 | 30  | 18 |
| P63038 | 60 kDa heat shock protein, mitochondrial (Heat shock protein 60) (HSP-60) (Hsp60) (60 kDa chaperonin) (Chaperonin 60) (CPN60) (Mitochondrial matrix protein P1) (HSP-65)                                                      | Hspd1 (Hsp60)               | 15   | 32  | 22  | 13 |
| P80317 | T-complex protein 1 subunit zeta (TCP-1-zeta) (CCT-zeta) (CCT-zeta-1)                                                                                                                                                         | Cct6a (Cct6) (Cctz) (Cctz1) | 160  | 52  | 22  | 13 |
| P10630 | Eukaryotic initiation factor 4A-II (eIF-4A-II) (eIF4A-II) (EC 3.6.1.-) (ATP-dependent RNA helicase eIF4A-2)                                                                                                                   | Eif4a2 (Ddx2b)              | 194  | 78  | 17  | 10 |
| P09041 | Phosphoglycerate kinase 2 (EC 2.7.2.3) (Phosphoglycerate kinase, testis specific)                                                                                                                                             | Pgk2 (Pgk-2)                | 162  | 73  | 17  | 10 |
| P63017 | Heat shock cognate 71 kDa protein (Heat shock 70 kDa protein 8)                                                                                                                                                               | Hspa8 (Hsc70) (Hsc73)       | 1719 | 959 | 119 | 70 |
| P05532 | Mast/stem cell growth factor receptor (SCFR) (EC 2.7.10.1) (Proto-oncogene tyrosine-protein kinase Kit) (c-kit) (CD antigen CD117)                                                                                            | Kit (SI)                    | 16   | 35  | 12  | 7  |
| P62900 | 60S ribosomal protein L31                                                                                                                                                                                                     | Rpl31                       | 124  | 62  | 12  | 7  |

|        |                                                                                                                                                                                                                                     |                             |     |     |    |    |
|--------|-------------------------------------------------------------------------------------------------------------------------------------------------------------------------------------------------------------------------------------|-----------------------------|-----|-----|----|----|
| Q9JI78 | Peptide-N(4)-(N-acetyl-beta-glucosaminy)asparagine amidase (PNGase) (mPNGase) (EC 3.5.1.52) (Peptide:N-glycanase) (N-glycanase 1)                                                                                                   | Ngly1                       | 29  | 32  | 19 | 11 |
| P41105 | 60S ribosomal protein L28                                                                                                                                                                                                           | Rpl28                       | 49  | 41  | 19 | 11 |
| Q9CZX8 | 40S ribosomal protein S19                                                                                                                                                                                                           | Rps19                       | 206 | 146 | 19 | 11 |
| P47963 | 60S ribosomal protein L13 (A52)                                                                                                                                                                                                     | Rpl13                       | 744 | 379 | 47 | 27 |
| P53762 | Aryl hydrocarbon receptor nuclear translocator (ARNT protein) (Dioxin receptor, nuclear translocator) (Hypoxia-inducible factor 1 beta) (HIF-1 beta)                                                                                | Arnt                        | 25  | 22  | 7  | 4  |
| P47757 | F-actin-capping protein subunit beta (CapZ beta)                                                                                                                                                                                    | Capzb (Cappb1)              | 107 | 68  | 7  | 4  |
| P26043 | Radixin (ESP10)                                                                                                                                                                                                                     | Rdx                         | 127 | 106 | 23 | 13 |
| P49722 | Proteasome subunit alpha type-2 (EC 3.4.25.1) (Proteasome component C3) (Macropain subunit C3) (Multicatalytic endopeptidase complex subunit C3)                                                                                    | Psm2 (Lmpc3)                | 188 | 103 | 16 | 9  |
| Q9R1X4 | Protein timeless homolog (mTim)                                                                                                                                                                                                     | Timeless (Tim1) (Timeless1) | 22  | 25  | 16 | 9  |
| P97461 | 40S ribosomal protein S5                                                                                                                                                                                                            | Rps5                        | 89  | 33  | 32 | 18 |
| Q8K2I9 | F-box only protein 18 (EC 3.6.1.-) (F-box DNA helicase 1)                                                                                                                                                                           | Fbxo18 (Fbh1) (Fbx18)       | 30  | 23  | 9  | 5  |
| P63073 | Eukaryotic translation initiation factor 4E (eIF-4E) (eIF4E) (mRNA cap-binding protein) (eIF-4F 25 kDa subunit)                                                                                                                     | Eif4e                       | 110 | 25  | 9  | 5  |
| Q64105 | Sepiapterin reductase (SPR) (EC 1.1.1.153)                                                                                                                                                                                          | Spr                         | 43  | 27  | 9  | 5  |
| Q8BYH8 | Chromodomain-helicase-DNA-binding protein 9 (CHD-9) (EC 3.6.1.-) (ATP-dependent helicase CHD9) (Peroxisomal proliferator-activated receptor A-interacting complex 320 kDa protein) (PPAR-alpha-interacting complex protein 320 kDa) | Chd9 (Kiaa0308) (Pric320)   | 39  | 27  | 49 | 27 |

|                                 |        |                                                                                                                                                                        |                                |     |     |    |    |
|---------------------------------|--------|------------------------------------------------------------------------------------------------------------------------------------------------------------------------|--------------------------------|-----|-----|----|----|
|                                 | P17918 | Proliferating cell nuclear antigen (PCNA) (Cyclin)                                                                                                                     | Pcna                           | 273 | 207 | 20 | 11 |
|                                 | O35664 | Interferon-alpha/beta receptor beta chain (Interferon alpha/beta receptor 2) (IFN-alpha-REC) (Type I interferon receptor) (IFN-R)                                      | Ifnar2                         | 37  | 21  | 11 | 6  |
|                                 | Q9WUJ8 | Origin recognition complex subunit 6                                                                                                                                   | Orc6l (Orc6)                   | 59  | 37  | 13 | 7  |
|                                 | Q9D6F9 | Tubulin beta-4 chain                                                                                                                                                   | Tubb4                          | 888 | 493 | 58 | 31 |
|                                 | O88844 | Isocitrate dehydrogenase [NADP] cytoplasmic (IDH) (EC 1.1.1.42) (Cytosolic NADP-isocitrate dehydrogenase) (Oxalosuccinate decarboxylase) (NADP(+)-specific ICDH) (IDP) | Idh1                           | 155 | 163 | 15 | 8  |
|                                 | Q61390 | T-complex protein 1 subunit zeta-2 (TCP-1-zeta-2) (CCT-zeta-2) (Cctz-2)                                                                                                | Cct6b                          | 55  | 52  | 15 | 8  |
|                                 | P11103 | Poly [ADP-ribose] polymerase 1 (PARP-1) (EC 2.4.2.30) (ADPRT) (NAD(+) ADP-ribosyltransferase 1) (Poly[ADP-ribose] synthetase 1) (msPARP)                               | Parp1 (Adprp) (Adprt) (Adprt1) | 21  | 26  | 17 | 9  |
|                                 | Q922F4 | Tubulin beta-6 chain                                                                                                                                                   | Tubb6                          | 583 | 382 | 40 | 21 |
|                                 | P97351 | 40S ribosomal protein S3a                                                                                                                                              | Rps3a                          | 899 | 392 | 50 | 26 |
|                                 | Q9ERD7 | Tubulin beta-3 chain                                                                                                                                                   | Tubb3                          | 780 | 383 | 52 | 27 |
|                                 | Q80UE6 | Serine/threonine-protein kinase WNK4 (EC 2.7.11.1) (Protein kinase with no lysine 4) (Protein kinase, lysine-deficient 4)                                              | Wnk4 (Prkwnk4)                 | 23  | 33  | 29 | 15 |
| macromolecule metabolic process | P97311 | DNA replication licensing factor MCM6 (Mis5 homolog)                                                                                                                   | Mcm6 (Mcmd6) (Mis5)            | 110 | 395 | 20 | 38 |
|                                 | Q9CXW3 | Calcyclin-binding protein (CacyBP) (Siah-interacting protein)                                                                                                          | Cacybp (Sip)                   | 57  | 39  | 7  | 13 |
|                                 | P06745 | Glucose-6-phosphate isomerase (GPI) (EC 5.3.1.9) (Phosphoglucose isomerase) (PGI) (Phosphohexose isomerase) (PHI) (Neuroleukin) (NLK)                                  | Gpi (Gpi1)                     | 39  | 107 | 12 | 22 |
|                                 | Q7TSG3 | F-box only protein 5 (Early mitotic inhibitor 1)                                                                                                                       | Fbxo5 (Emi1)                   | 15  | 27  | 5  | 9  |

|        |                                                                                                                                                                                                                                          |                                   |      |      |     |     |
|--------|------------------------------------------------------------------------------------------------------------------------------------------------------------------------------------------------------------------------------------------|-----------------------------------|------|------|-----|-----|
| Q8BYC6 | Serine/threonine-protein kinase TAO3 (EC 2.7.11.1) (Thousand and one amino acid protein 3)                                                                                                                                               | Taok3                             | 32   | 38   | 9   | 16  |
| P62962 | Profilin-1 (Profilin I)                                                                                                                                                                                                                  | Pfn1                              | 30   | 93   | 4   | 7   |
| P18760 | Cofilin-1 (Cofilin, non-muscle isoform)                                                                                                                                                                                                  | Cfl1                              | 959  | 2552 | 70  | 122 |
| P17742 | Peptidyl-prolyl cis-trans isomerase A (PPIase A) (Rotamase A) (EC 5.2.1.8) (Cyclophilin A) (Cyclosporin A-binding protein) (SP18)                                                                                                        | Ppia                              | 855  | 1549 | 38  | 66  |
| Q9Z1R2 | Large proline-rich protein BAT3 (HLA-B-associated transcript 3)                                                                                                                                                                          | Bat3                              | 80   | 49   | 15  | 26  |
| Q9R117 | Non-receptor tyrosine-protein kinase TYK2 (EC 2.7.10.2)                                                                                                                                                                                  | Tyk2                              | 27   | 30   | 15  | 26  |
| Q9D009 | Putative octanoyltransferase, mitochondrial (EC 2.3.1.181) (Octanoyl-[acyl-carrier-protein]-protein N-octanoyltransferase) (Lipoyl/octanoyl transferase) (Lipoate-protein ligase B)                                                      |                                   | 38   | 42   | 11  | 19  |
| Q9Z129 | ATP-dependent DNA helicase Q1 (EC 3.6.1.-) (DNA-dependent ATPase Q1)                                                                                                                                                                     | Recql (Recql1)                    | 17   | 27   | 13  | 22  |
| Q9ERK4 | Exportin-2 (Exp2) (Importin-alpha re-exporter) (Chromosome segregation 1-like protein)                                                                                                                                                   | Cse1l (Xpo2)                      | 42   | 153  | 26  | 44  |
| P52480 | Pyruvate kinase isozymes M1/M2 (EC 2.7.1.40) (Pyruvate kinase muscle isozyme)                                                                                                                                                            | Pkm2 (Pk3) (Pykm)                 | 1954 | 3481 | 138 | 233 |
| Q8CGP2 | Histone H2B type 1-P                                                                                                                                                                                                                     | Hist1h2bp                         | 436  | 999  | 46  | 77  |
| P57776 | Elongation factor 1-delta (EF-1-delta)                                                                                                                                                                                                   | Eef1d                             | 109  | 35   | 3   | 5   |
| P62960 | Nuclease-sensitive element-binding protein 1 (Y-box-binding protein 1) (Y-box transcription factor) (YB-1) (CCAAT-binding transcription factor I subunit A) (CBF-A) (Enhancer factor I subunit A) (EFI-A) (DNA-binding protein B) (DBPB) | Ybx1 (Msy-1) (Msy1) (Nsep1) (Yb1) | 56   | 126  | 6   | 10  |
| P35980 | 60S ribosomal protein L18                                                                                                                                                                                                                | Rpl18                             | 32   | 22   | 51  | 85  |

|        |                                                                                                                                                     |                                                                                                                                                                               |     |      |    |    |
|--------|-----------------------------------------------------------------------------------------------------------------------------------------------------|-------------------------------------------------------------------------------------------------------------------------------------------------------------------------------|-----|------|----|----|
| P62806 | Histone H4                                                                                                                                          | Hist1h4a;<br>Hist1h4b (H4-53); Hist1h4c (H4-12);<br>Hist1h4d;<br>Hist1h4f;<br>Hist1h4h;<br>Hist1h4i;<br>Hist1h4j;<br>Hist1h4k;<br>Hist1h4m;<br>Hist2h4a (Hist2h4);<br>Hist4h4 | 815 | 1617 | 47 | 78 |
| Q64475 | Histone H2B type 1-B (h2B-143)                                                                                                                      | Hist1h2bb                                                                                                                                                                     | 436 | 999  | 46 | 75 |
| Q8BHG1 | Nardilysin (EC 3.4.24.61) (N-arginine dibasic convertase) (NRD convertase) (NRD-C)                                                                  | Nrd1                                                                                                                                                                          | 53  | 54   | 13 | 21 |
| Q6ZWX6 | Eukaryotic translation initiation factor 2 subunit 1 (Eukaryotic translation initiation factor 2 subunit alpha) (eIF-2-alpha) (EIF-2alpha) (EIF-2A) | Eif2s1 (Eif2a)                                                                                                                                                                | 27  | 177  | 7  | 11 |
| Q80Y17 | Lethal(2) giant larvae protein homolog 1 (LLGL) (Mlg1) (Mgl-1)                                                                                      | Llg1 (Llg1h)                                                                                                                                                                  | 30  | 29   | 7  | 11 |
| Q61990 | Poly(rC)-binding protein 2 (Alpha-CP2) (Putative heterogeneous nuclear ribonucleoprotein X) (hnRNP X) (CTBP) (CBP)                                  | Pcbp2 (Cbp) (HnrnpX) (Hnrpx)                                                                                                                                                  | 29  | 194  | 7  | 11 |
| P63001 | Ras-related C3 botulinum toxin substrate 1 (p21-Rac1)                                                                                               | Rac1                                                                                                                                                                          | 31  | 99   | 7  | 11 |
| P62082 | 40S ribosomal protein S7                                                                                                                            | Rps7                                                                                                                                                                          | 104 | 126  | 9  | 14 |
| Q9Z1S0 | Mitotic checkpoint serine/threonine-protein kinase BUB1 beta (EC 2.7.11.1) (MAD3/BUB1-related protein kinase) (Mitotic checkpoint kinase MAD3L)     | Bub1b (Mad3l)                                                                                                                                                                 | 20  | 41   | 15 | 23 |



|        |                                                                                                                                                                    |                      |     |     |    |    |
|--------|--------------------------------------------------------------------------------------------------------------------------------------------------------------------|----------------------|-----|-----|----|----|
| P63158 | High mobility group protein B1 (High mobility group protein 1) (HMG-1)                                                                                             | Hmgb1 (Hmg-1) (Hmg1) | 153 | 405 | 25 | 38 |
| Q8K386 | Ras-related protein Rab-15                                                                                                                                         | Rab15                | 44  | 74  | 4  | 6  |
| O55142 | 60S ribosomal protein L35a                                                                                                                                         | Rpl35a               | 24  | 50  | 4  | 6  |
| P83741 | Serine/threonine-protein kinase WNK1 (EC 2.7.11.1) (Protein kinase with no lysine 1) (Protein kinase, lysine-deficient 1)                                          | Wnk1 (Prkwnk1)       | 56  | 36  | 18 | 27 |
| P53657 | Pyruvate kinase isozymes R/L (EC 2.7.1.40) (L PK)                                                                                                                  | Pklr                 | 144 | 270 | 26 | 38 |
| P97868 | Retinoblastoma-binding protein 6 (p53-associated cellular protein of testis) (Proliferation potential-related protein) (Protein P2P-R)                             | Rbbp6 (P2pr) (Pact)  | 21  | 29  | 24 | 35 |
| Q3THW5 | Histone H2A.V (H2A.F/Z)                                                                                                                                            | H2afv (H2av)         | 297 | 426 | 11 | 16 |
| P99026 | Proteasome subunit beta type-4 (Proteasome beta chain) (EC 3.4.25.1) (Macropain beta chain) (Multicatalytic endopeptidase complex beta chain) (Proteasome chain 3) | Psmb4 (Lmp3)         | 93  | 289 | 11 | 16 |
| Q9QZ39 | Alpha-N-acetylgalactosaminide alpha-2,6-sialyltransferase 1 (EC 2.4.99.3) (GalNAc alpha-2,6-sialyltransferase I) (ST6GalNAc I) (Sialyltransferase 7A)              | St6galnac1 (Siat7a)  | 27  | 18  | 11 | 16 |
| P60335 | Poly(rC)-binding protein 1 (Alpha-CP1) (hnRNP-E1)                                                                                                                  | Pcbp1                | 56  | 350 | 9  | 13 |
| P35761 | Dual specificity protein kinase TTK (ESK) (PYT) (EC 2.7.12.1)                                                                                                      | Ttk (Esk)            | 14  | 34  | 9  | 13 |
| O70251 | Elongation factor 1-beta (EF-1-beta)                                                                                                                               | Eef1b (Eef1b2)       | 39  | 102 | 7  | 10 |
| Q00342 | FL cytokine receptor (EC 2.7.10.1) (Tyrosine-protein kinase receptor flk-2) (Fetal liver kinase 2) (Tyrosine-protein kinase FLT3) (CD antigen CD135)               | Flt3 (Flk-2) (Flt3)  | 17  | 34  | 7  | 10 |

|        |                                                                                                                                                                                                                                                       |                                  |      |      |    |    |
|--------|-------------------------------------------------------------------------------------------------------------------------------------------------------------------------------------------------------------------------------------------------------|----------------------------------|------|------|----|----|
| P12813 | Nuclear receptor subfamily 4 group A member 1 (Orphan nuclear receptor HMR) (Nuclear hormone receptor NUR/77) (N10 nuclear protein)                                                                                                                   | Nr4a1 (Gfrp) (Hmr) (N10) (Nur77) | 61   | 31   | 7  | 10 |
| Q9Z1F9 | SUMO-activating enzyme subunit 2 (EC 6.3.2.-) (Ubiquitin-like 1-activating enzyme E1B) (Anthracycline-associated resistance ARX)                                                                                                                      | Uba2 (Sae2) (Uble1b)             | 62   | 77   | 10 | 14 |
| P70696 | Histone H2B type 1-A (Histone H2B, testis) (Testis-specific histone H2B)                                                                                                                                                                              | Hist1h2ba (Th2b)                 | 146  | 378  | 37 | 51 |
| P05214 | Tubulin alpha-3 chain (Tubulin alpha-3/alpha-7 chain) (Alpha-tubulin 3/7) (Alpha-tubulin isotype M-alpha-3/7)                                                                                                                                         | Tuba3a (Tuba3); Tuba3b (Tuba7)   | 1112 | 1288 | 61 | 84 |
| P17047 | Lysosome-associated membrane glycoprotein 2 (LAMP-2) (Lysosomal membrane glycoprotein type B) (LGP-B) (CD107 antigen-like family member B) (CD antigen CD107b)                                                                                        | Lamp2 (Lamp-2)                   | 26   | 29   | 8  | 11 |
| P27641 | ATP-dependent DNA helicase 2 subunit 2 (EC 3.6.1.-) (ATP-dependent DNA helicase II 80 kDa subunit) (Ku autoantigen protein p86 homolog) (Ku80) (CTC box-binding factor 85 kDa subunit) (CTCBF) (CTC85) (Nuclear factor IV) (DNA repair protein XRCC5) | Xrcc5 (G22p2)                    | 22   | 29   | 16 | 22 |
| P70338 | Zinc finger protein Gfi-1 (Growth factor independent protein 1)                                                                                                                                                                                       | Gfi1 (Gfi-1)                     | 45   | 39   | 17 | 23 |
| Q61789 | Laminin subunit alpha-3 (Nicein subunit alpha)                                                                                                                                                                                                        | Lama3                            | 26   | 26   | 37 | 50 |
| Q9EPL8 | Importin-7 (Imp7) (Ran-binding protein 7) (RanBP7)                                                                                                                                                                                                    | Ipo7 (Ranbp7)                    | 25   | 121  | 9  | 12 |

|        |                                                                                                                                                                                                                                                                                        |                        |     |     |    |    |
|--------|----------------------------------------------------------------------------------------------------------------------------------------------------------------------------------------------------------------------------------------------------------------------------------------|------------------------|-----|-----|----|----|
| Q9WTX2 | Interferon-inducible double stranded RNA-dependent protein kinase activator A (Protein kinase, interferon-inducible double stranded RNA-dependent activator) (Protein activator of the interferon-induced protein kinase) (PKR-associated protein X) (PKR-associating protein X) (RAX) | Prkra (Rax)            | 28  | 39  | 9  | 12 |
| Q9ERU9 | E3 SUMO-protein ligase RanBP2 (Ran-binding protein 2)                                                                                                                                                                                                                                  | Ranbp2                 | 56  | 49  | 40 | 53 |
| Q5SXJ3 | Fanconi anemia group J protein homolog (Protein FACJ) (EC 3.6.1.-) (ATP-dependent RNA helicase BRIP1) (BRCA1-interacting protein C-terminal helicase 1) (BRCA1-interacting protein 1) (BRCA1-associated C-terminal helicase 1)                                                         | Brip1 (Bach1) (Fancj)  | 25  | 18  | 13 | 17 |
| P70168 | Importin subunit beta-1 (Karyopherin subunit beta-1) (Nuclear factor P97) (Pore targeting complex 97 kDa subunit) (PTAC97) (SCG)                                                                                                                                                       | Kpnb1 (Impnb)          | 48  | 17  | 13 | 17 |
| Q9Z277 | Bromodomain adjacent to zinc finger domain protein 1B (Williams-Beuren syndrome chromosomal region 9 protein homolog) (WBRS9)                                                                                                                                                          | Baz1b (Wbscr9)         | 43  | 17  | 26 | 34 |
| Q61846 | Maternal embryonic leucine zipper kinase (EC 2.7.11.1) (Protein kinase PK38) (mPK38)                                                                                                                                                                                                   | Melk (Kiaa0175) (Pk38) | 28  | 32  | 10 | 13 |
| P47753 | F-actin-capping protein subunit alpha-1 (CapZ alpha-1)                                                                                                                                                                                                                                 | Capza1 (Cappa1)        | 60  | 33  | 7  | 9  |
| P63163 | Small nuclear ribonucleoprotein-associated protein N (snRNP-N) (Sm protein N) (Sm-N) (SmN) (Sm-D) (Tissue-specific-splicing protein)                                                                                                                                                   | Snrpn (Smn)            | 38  | 17  | 7  | 9  |
| Q7TQ07 | DNA polymerase nu (EC 2.7.7.7)                                                                                                                                                                                                                                                         | Poln                   | 20  | 39  | 14 | 18 |
| P05064 | Fructose-bisphosphate aldolase A (EC 4.1.2.13) (Muscle-type aldolase) (Aldolase 1)                                                                                                                                                                                                     | Aldoa (Aldo1)          | 211 | 567 | 36 | 46 |

|        |                                                                                                                                                                          |                                  |     |     |     |     |
|--------|--------------------------------------------------------------------------------------------------------------------------------------------------------------------------|----------------------------------|-----|-----|-----|-----|
| Q07133 | Histone H1t (Testicular H1 histone)                                                                                                                                      | Hist1h1t (H1ft) (H1t)            | 46  | 72  | 54  | 69  |
| Q923B1 | Lariat debranching enzyme (EC 3.1.-.-)                                                                                                                                   | Dbr1                             | 28  | 29  | 15  | 19  |
| P27661 | Histone H2A.x (H2a/x)                                                                                                                                                    | H2afx (H2a.x) (H2ax) (Hist5-2ax) | 301 | 426 | 15  | 19  |
| Q62093 | Splicing factor, arginine/serine-rich 2 (Splicing factor SC35) (SC-35) (Splicing component, 35 kDa) (Protein PR264) (Putative myelin regulatory factor 1) (MRF-1)        | Sfrs2 (Pr264) (Sfrs10)           | 184 | 117 | 15  | 19  |
| P28271 | Cytoplasmic aconitate hydratase (Aconitase) (EC 4.2.1.3) (Citrate hydro-lyase) (Iron-responsive element-binding protein 1) (IRE-BP 1) (Iron regulatory protein 1) (IRP1) | Aco1 (Ireb1) (Irebp)             | 77  | 122 | 147 | 184 |
| P61028 | Ras-related protein Rab-8B                                                                                                                                               | Rab8b                            | 17  | 59  | 4   | 5   |
| Q60716 | Prolyl 4-hydroxylase subunit alpha-2 (EC 1.14.11.2) (4-PH alpha-2) (Procollagen-proline,2-oxoglutarate-4-dioxygenase subunit alpha-2)                                    | P4ha2                            | 22  | 27  | 8   | 10  |
| P17183 | Gamma-enolase (EC 4.2.1.11) (2-phospho-D-glycerate hydro-lyase) (Neural enolase) (Neuron-specific enolase) (NSE) (Enolase 2)                                             | Eno2 (Eno-2)                     | 228 | 181 | 12  | 15  |
| Q811J3 | Iron-responsive element-binding protein 2 (IRE BP 2) (Iron regulatory protein 2) (IRP2)                                                                                  | Ireb2 (Irp2)                     | 69  | 119 | 142 | 176 |
| Q61316 | Heat shock 70 kDa protein 4 (Heat shock 70-related protein APG-2)                                                                                                        | Hspa4 (Apg2) (Hsp110)            | 379 | 792 | 42  | 52  |
| Q8BU30 | Isoleucyl-tRNA synthetase, cytoplasmic (EC 6.1.1.5) (Isoleucine--tRNA ligase) (IleRS) (IRS)                                                                              | Iars                             | 85  | 46  | 30  | 37  |
| Q8BGD9 | Eukaryotic translation initiation factor 4B (eIF-4B)                                                                                                                     | Eif4b                            | 238 | 306 | 13  | 16  |

|        |                                                                                                                                                                                                                             |                           |    |     |     |     |
|--------|-----------------------------------------------------------------------------------------------------------------------------------------------------------------------------------------------------------------------------|---------------------------|----|-----|-----|-----|
| Q61466 | SWI/SNF-related matrix-associated actin-dependent regulator of chromatin subfamily D member 1 (SWI/SNF complex 60 kDa subunit) (60 kDa BRG-1/Brm-associated factor subunit A) (BRG1-associated factor 60A) (D15KZ1 protein) | Smarcd1 (Baf60a) (D15Kz1) | 27 | 29  | 13  | 16  |
| P59270 | Galactosylgalactosylxylosylprotein 3-beta-glucuronosyltransferase 2 (EC 2.4.1.135) (Beta-1,3-glucuronyltransferase 2) (UDP-glucuronosyltransferase-S) (Glucuronosyltransferase-S) (GlcAT-S) (GlcAT-D)                       | B3gat2 (Glcats)           | 29 | 16  | 9   | 11  |
| Q8VII8 | Mineralocorticoid receptor (MR) (Nuclear receptor subfamily 3 group C member 2)                                                                                                                                             | Nr3c2 (Mlr)               | 28 | 22  | 18  | 22  |
| Q9R1P0 | Proteasome subunit alpha type-4 (EC 3.4.25.1) (Proteasome component C9) (Macropain subunit C9) (Multicatalytic endopeptidase complex subunit C9) (Proteasome subunit L)                                                     | Psm4                      | 29 | 151 | 14  | 17  |
| Q9CZY3 | Ubiquitin-conjugating enzyme E2 variant 1 (UEV-1) (CROC-1)                                                                                                                                                                  | Ube2v1 (Croc1)            | 83 | 163 | 166 | 201 |
| O08648 | Mitogen-activated protein kinase kinase kinase 4 (EC 2.7.11.25) (MAPK/ERK kinase kinase 4) (MEK kinase 4) (MEKK 4)                                                                                                          | Map3k4 (Mekk4)            | 37 | 16  | 19  | 23  |
| P49025 | Citron Rho-interacting kinase (CRIK) (EC 2.7.11.1) (Rho-interacting, serine/threonine-protein kinase 21)                                                                                                                    | Cit                       | 49 | 67  | 67  | 81  |
| P47754 | F-actin-capping protein subunit alpha-2 (CapZ alpha-2)                                                                                                                                                                      | Capza2 (Cappa2)           | 60 | 33  | 5   | 6   |
| O35618 | Protein Mdm4 (p53-binding protein Mdm4) (Mdm2-like p53-binding protein) (Protein Mdmx) (Double minute 4 protein)                                                                                                            | Mdm4 (Mdmx)               | 17 | 29  | 5   | 6   |
| Q6PDM2 | Splicing factor, arginine/serine-rich 1 (ASF/SF2)                                                                                                                                                                           | Sfrs1                     | 24 | 91  | 5   | 6   |
| Q60848 | Lymphocyte-specific helicase (EC 3.6.1.-) (Proliferation associated SNF2-like protein)                                                                                                                                      | Hells (Lsh) (Pasg)        | 37 | 35  | 10  | 12  |

|        |                                                                                                                                                                                         |                            |     |     |     |     |
|--------|-----------------------------------------------------------------------------------------------------------------------------------------------------------------------------------------|----------------------------|-----|-----|-----|-----|
| P54227 | Stathmin (Phosphoprotein p19) (pp19) (Leukemia-associated phosphoprotein p18) (Oncoprotein 18) (Op18) (pp17) (Prosolin) (Metablastin) (Protein Pr22) (Leukemia-associated gene protein) | Stmn1 (Lag) (Lap18) (Pr22) | 121 | 120 | 10  | 12  |
| Q8BFY9 | Transportin-1 (Importin beta-2) (Karyopherin beta-2)                                                                                                                                    | Tnp1 (Kpnb2)               | 54  | 43  | 10  | 12  |
| Q9QUR6 | Prolyl endopeptidase (PE) (EC 3.4.21.26) (Post-proline cleaving enzyme)                                                                                                                 | Prep (Pep)                 | 56  | 20  | 15  | 18  |
| P80315 | T-complex protein 1 subunit delta (TCP-1-delta) (CCT-delta) (A45)                                                                                                                       | Cct4 (Cctd)                | 61  | 59  | 15  | 18  |
| O08810 | 116 kDa U5 small nuclear ribonucleoprotein component (U5 snRNP-specific protein, 116 kDa) (U5-116 kDa) (Elongation factor Tu GTP-binding domain-containing protein 2)                   | Eftud2 (Snrp116)           | 80  | 68  | 21  | 25  |
| P54103 | DnaJ homolog subfamily C member 2 (Zuotin-related factor 1) (Mouse Id associate 1) (MIDA1)                                                                                              | Dnajc2 (Mida1) (Zrf1)      | 23  | 27  | 11  | 13  |
| P80313 | T-complex protein 1 subunit eta (TCP-1-eta) (CCT-eta)                                                                                                                                   | Cct7 (Ccth)                | 49  | 50  | 11  | 13  |
| Q8C3X4 | GTP-binding protein GUF1 homolog                                                                                                                                                        | Guf1                       | 311 | 506 | 412 | 483 |
| Q61122 | NGFI-A-binding protein 1 (EGR-1-binding protein 1)                                                                                                                                      | Nab1                       | 30  | 25  | 6   | 7   |
| Q6GSS7 | Histone H2A type 2-A (H2A.2) (H2a-614) (H2a-615)                                                                                                                                        | Hist2h2aa1; Hist2h2aa2     | 505 | 763 | 18  | 21  |
| P49718 | DNA replication licensing factor MCM5 (CDC46 homolog) (P1-CDC46)                                                                                                                        | Mcm5 (Cdc46) (Mcmd5)       | 40  | 20  | 18  | 21  |
| P48754 | Breast cancer type 1 susceptibility protein homolog                                                                                                                                     | Brca1                      | 28  | 25  | 26  | 30  |
| Q9JKP5 | Muscleblind-like protein 1 (Triplet-expansion RNA-binding protein)                                                                                                                      | Mbnl1 (Exp) (Mbnl)         | 45  | 63  | 244 | 281 |
| Q62418 | Drebrin-like protein (SH3 domain-containing protein 7) (Actin-binding protein 1)                                                                                                        | Dbnl (Abp1) (Sh3p7)        | 24  | 39  | 7   | 8   |

|        |                                                                                                                                                                                                                                                                                                                    |                                  |     |     |    |    |
|--------|--------------------------------------------------------------------------------------------------------------------------------------------------------------------------------------------------------------------------------------------------------------------------------------------------------------------|----------------------------------|-----|-----|----|----|
| Q9QWY8 | 130 kDa phosphatidylinositol 4,5-biphosphate-dependent ARF1 GTPase-activating protein (PIP2-dependent ARF1 GAP) (ADP-ribosylation factor-directed GTPase-activating protein 1) (ARF GTPase-activating protein 1) (Development and differentiation-enhancing factor 1) (Differentiation-enhancing factor 1) (DEF-1) | Ddef1 (Asap1) (Kiaa1249) (Shag1) | 26  | 23  | 14 | 16 |
| Q6A4J8 | Ubiquitin carboxyl-terminal hydrolase 7 (EC 3.1.2.15) (Ubiquitin thioesterase 7) (Ubiquitin-specific-processing protease 7) (Deubiquitinating enzyme 7) (Herpesvirus-associated ubiquitin-specific protease) (mHAUSP)                                                                                              | Usp7 (Hausp)                     | 27  | 18  | 14 | 16 |
| P58660 | Caspase recruitment domain-containing protein 10 (Bcl10-interacting MAGUK protein 1) (Bimp1)                                                                                                                                                                                                                       | Card10 (Bimp1)                   | 33  | 23  | 15 | 17 |
| P97820 | Mitogen-activated protein kinase kinase kinase kinase 4 (EC 2.7.11.1) (MAPK/ERK kinase kinase kinase 4) (MEK kinase kinase 4) (MEKKK 4) (HPK/GCK-like kinase HGK) (Nck-interacting kinase)                                                                                                                         | Map4k4 (Nik)                     | 65  | 54  | 15 | 17 |
| P62270 | 40S ribosomal protein S18 (Ke-3) (Ke3)                                                                                                                                                                                                                                                                             | Rps18                            | 210 | 209 | 15 | 17 |
| P55200 | Histone-lysine N-methyltransferase HRX (EC 2.1.1.43) (Zinc finger protein HRX) (ALL-1)                                                                                                                                                                                                                             | Mll (All1) (Hrx) (Mll1)          | 67  | 26  | 39 | 44 |
| P62908 | 40S ribosomal protein S3                                                                                                                                                                                                                                                                                           | Rps3                             | 778 | 762 | 39 | 44 |
| Q921M3 | Splicing factor 3B subunit 3 (Spliceosome-associated protein 130) (SAP 130) (Pre-mRNA splicing factor SF3b 130 kDa subunit) (SF3b130)                                                                                                                                                                              | Sf3b3 (Kiaa0017)                 | 16  | 34  | 24 | 27 |
| Q9WUF3 | CASP8-associated protein 2 (FLICE-associated huge protein)                                                                                                                                                                                                                                                         | Casp8ap2 (Flash)                 | 28  | 16  | 26 | 29 |

|        |                                                                                                                                                                                                                     |                                   |      |      |     |     |
|--------|---------------------------------------------------------------------------------------------------------------------------------------------------------------------------------------------------------------------|-----------------------------------|------|------|-----|-----|
| Q64467 | Glyceraldehyde-3-phosphate dehydrogenase, testis-specific (EC 1.2.1.12) (Spermatogenic glyceraldehyde-3-phosphate dehydrogenase) (Spermatogenic cell-specific glyceraldehyde 3-phosphate dehydrogenase 2) (GAPDH-2) | Gapdhs (Gapds) (Gapds)            | 75   | 781  | 26  | 29  |
| P41230 | Histone demethylase JARID1C (EC 1.14.11.-) (Jumonji/ARID domain-containing protein 1C) (Protein SmcX) (Protein Xe169)                                                                                               | Jarid1c (Kiaa0234) (Smcx) (Xe169) | 34   | 32   | 26  | 29  |
| P26618 | Alpha-type platelet-derived growth factor receptor (EC 2.7.10.1) (PDGF-R-alpha) (CD140 antigen-like family member A) (CD antigen CD140a)                                                                            | Pdgfra                            | 37   | 73   | 160 | 178 |
| P19253 | 60S ribosomal protein L13a (Transplantation antigen P198) (Tum-P198 antigen)                                                                                                                                        | Rpl13a (P198) (Tstap198-7)        | 27   | 65   | 9   | 10  |
| P62631 | Elongation factor 1-alpha 2 (EF-1-alpha-2) (Elongation factor 1 A-2) (eEF1A-2) (Statin S1)                                                                                                                          | Eef1a2 (Eef1a1) (Stn)             | 1275 | 1549 | 258 | 285 |
| Q62446 | FK506-binding protein 3 (EC 5.2.1.8) (Peptidyl-prolyl cis-trans isomerase) (PPIase) (Rotamase) (25 kDa FKBP) (FKBP-25) (Rapamycin-selective 25 kDa immunophilin)                                                    | Fkbp3 (Fkbp25)                    | 31   | 31   | 10  | 11  |
| O55234 | Proteasome subunit beta type-5 (EC 3.4.25.1) (Proteasome epsilon chain) (Macropain epsilon chain) (Multicatalytic endopeptidase complex epsilon chain) (Proteasome subunit X) (Proteasome chain 6)                  | Psmb5                             | 168  | 227  | 10  | 11  |
| Q93092 | Transaldolase (EC 2.2.1.2)                                                                                                                                                                                          | Taldo1 (Tal) (Taldo)              | 20   | 93   | 10  | 11  |
| Q9D8N0 | Elongation factor 1-gamma (EF-1-gamma) (eEF-1B gamma)                                                                                                                                                               | Eef1g                             | 31   | 85   | 11  | 12  |



|        |                                                                                                                                                                                                             |                                    |      |      |     |     |
|--------|-------------------------------------------------------------------------------------------------------------------------------------------------------------------------------------------------------------|------------------------------------|------|------|-----|-----|
| P49717 | DNA replication licensing factor MCM4 (CDC21 homolog) (P1-CDC21)                                                                                                                                            | Mcm4 (Cdc21) (Mcmd4)               | 29   | 18   | 11  | 12  |
| Q99KK9 | Probable histidyl-tRNA synthetase, mitochondrial (EC 6.1.1.21) (Histidine--tRNA ligase) (HisRS) (Histidine--tRNA ligase-like)                                                                               | Hars2 (Harsl)                      | 20   | 41   | 22  | 24  |
| P27546 | Microtubule-associated protein 4 (MAP-4)                                                                                                                                                                    | Map4 (Mtap4)                       | 94   | 41   | 33  | 36  |
| P07901 | Heat shock protein HSP 90-alpha (HSP 86) (Tumor-specific transplantation 86 kDa antigen) (TSTA)                                                                                                             | Hsp90aa1 (Hsp86) (Hsp86-1) (Hspca) | 1529 | 2324 | 134 | 146 |
| Q6P9Z1 | SWI/SNF-related matrix-associated actin-dependent regulator of chromatin subfamily D member 3 (60 kDa BRG-1/Brm-associated factor subunit C) (BRG1-associated factor 60C) (mBAF60c)                         | Smarcd3 (Baf60c)                   | 29   | 19   | 46  | 50  |
| P70298 | Homeobox protein cut-like 2 (Cut-like 2) (Homeobox protein Cux-2)                                                                                                                                           | Cux2 (Cutl2)                       | 30   | 22   | 12  | 13  |
| P38647 | Stress-70 protein, mitochondrial (75 kDa glucose-regulated protein) (GRP 75) (Heat shock 70 kDa protein 9) (Peptide-binding protein 74) (PBP74) (P66 MOT) (Mortalin)                                        | Hspa9 (Grp75) (Hsp74) (Hspa9a)     | 33   | 33   | 12  | 13  |
| Q8BKC5 | Importin-5 (Imp5) (Importin subunit beta-3) (Karyopherin beta-3) (Ran-binding protein 5) (RanBP5)                                                                                                           | Ipo5 (Kpnb3) (Ranbp5)              | 185  | 91   | 12  | 13  |
| P10126 | Elongation factor 1-alpha 1 (EF-1-alpha-1) (Elongation factor 1 A-1) (eEF1A-1) (Elongation factor Tu) (EF-Tu)                                                                                               | Eef1a1 (Eef1a)                     | 2004 | 2344 | 305 | 330 |
| P08113 | Endoplasmic reticulum chaperone protein (Heat shock protein 90 kDa beta member 1) (94 kDa glucose-regulated protein) (GRP94) (ERP99) (Polymorphic tumor rejection antigen 1) (Tumor rejection antigen gp96) | Hsp90b1 (Tra-1) (Tra1)             | 221  | 298  | 25  | 27  |

|        |                                                                                                                                                                                                                                                                                                                                        |                                    |      |      |    |    |
|--------|----------------------------------------------------------------------------------------------------------------------------------------------------------------------------------------------------------------------------------------------------------------------------------------------------------------------------------------|------------------------------------|------|------|----|----|
| Q9Z104 | SWI/SNF-related matrix-associated actin-dependent regulator of chromatin subfamily E member 1-related (SMARCE1-related protein) (HMG box-containing protein 20B) (Structural DNA-binding protein BRAF35) (BRCA2-associated factor 35)                                                                                                  | Hmg20b (Braf35) (Hmgx2) (Smarce1r) | 30   | 20   | 14 | 15 |
| P11984 | T-complex protein 1 subunit alpha A (TCP-1-alpha) (CCT-alpha) (Tailless complex polypeptide 1A) (TCP-1-A)                                                                                                                                                                                                                              | Cct1 (Ccta) (Tcp1)                 | 29   | 66   | 14 | 15 |
| P70398 | Probable ubiquitin carboxyl-terminal hydrolase FAF-X (EC 3.1.2.15) (Ubiquitin thioesterase FAF-X) (Ubiquitin-specific-processing protease FAF-X) (Deubiquitinating enzyme FAF-X) (Fat facets protein-related, X-linked) (Ubiquitin-specific protease 9, X chromosome) (Ubiquitin carboxyl-terminal hydrolase FAM) (Fat facets homolog) | Usp9x (Faf1) (Fam)                 | 42   | 28   | 57 | 61 |
| Q8BKX6 | Serine/threonine-protein kinase SMG1 (SMG-1) (EC 2.7.11.1)                                                                                                                                                                                                                                                                             | Smg1 (Kiaa0421)                    | 33   | 27   | 30 | 32 |
| P16858 | Glyceraldehyde-3-phosphate dehydrogenase (GAPDH) (EC 1.2.1.12)                                                                                                                                                                                                                                                                         | Gapdh (Gapd)                       | 1514 | 1781 | 84 | 89 |
| Q8VI56 | Low-density lipoprotein receptor-related protein 4 (LDLR dan)                                                                                                                                                                                                                                                                          | Lrp4 (Kiaa0816)                    | 77   | 30   | 19 | 20 |
| P16546 | Spectrin alpha chain, brain (Spectrin, non-erythroid alpha chain) (Alpha-II spectrin) (Fodrin alpha chain)                                                                                                                                                                                                                             | Sptan1 (Spna2) (Spta2)             | 68   | 86   | 66 | 69 |
| Q920R0 | Alsin (Amyotrophic lateral sclerosis protein 2 homolog)                                                                                                                                                                                                                                                                                | Als2                               | 74   | 88   | 72 | 75 |
| Q62504 | Msx2-interacting protein (SPEN homolog) (SMART/HDAC1-associated repressor protein)                                                                                                                                                                                                                                                     | Spn (Kiaa0929) (Mint) (Sharp)      | 27   | 18   | 72 | 75 |
| O35973 | Period circadian protein homolog 1 (Circadian clock protein PERIOD 1) (Circadian pacemaker protein Rigi) (mPER1)                                                                                                                                                                                                                       | Per1 (Per) (Rigi)                  | 29   | 21   | 27 | 28 |

|        |                                                                                                                                                                                                        |                                                |     |     |     |     |
|--------|--------------------------------------------------------------------------------------------------------------------------------------------------------------------------------------------------------|------------------------------------------------|-----|-----|-----|-----|
| P62281 | 40S ribosomal protein S11                                                                                                                                                                              | Rps11                                          | 166 | 132 | 27  | 28  |
| Q9JM05 | E3 SUMO-protein ligase PIAS4 (Protein inhibitor of activated STAT protein 4) (Protein inhibitor of activated STAT protein gamma) (PIAS-gamma) (PIASy)                                                  | Pias4 (Piasg)                                  | 26  | 29  | 162 | 165 |
| P62141 | Serine/threonine-protein phosphatase PP1-beta catalytic subunit (PP-1B) (EC 3.1.3.16)                                                                                                                  | Ppp1cb                                         | 177 | 57  | 4   | 4   |
| P12367 | cAMP-dependent protein kinase type II-alpha regulatory subunit                                                                                                                                         | Prkar2a                                        | 33  | 23  | 5   | 5   |
| Q3TXZ1 | Zinc finger protein 575                                                                                                                                                                                | Znf575<br>(Zfp575)                             | 30  | 25  | 5   | 5   |
| Q8VCZ3 | THAP domain-containing protein 7                                                                                                                                                                       | Thap7                                          | 26  | 18  | 6   | 6   |
| Q9R1P1 | Proteasome subunit beta type-3 (EC 3.4.25.1) (Proteasome theta chain) (Proteasome chain 13) (Proteasome component C10-II)                                                                              | Psmb3                                          | 87  | 135 | 7   | 7   |
| P30416 | FK506-binding protein 4 (EC 5.2.1.8) (Peptidyl-prolyl cis-trans isomerase) (PPIase) (Rotamase) (HSP-binding immunophilin) (HBI) (FKBP52 protein) (52 kDa FK506-binding protein) (FKBP59) (p59 protein) | Fkbp4                                          | 40  | 62  | 8   | 8   |
| Q9R190 | Metastasis-associated protein MTA2 (Metastasis-associated 1-like 1)                                                                                                                                    | Mta2 (Mta111)                                  | 27  | 26  | 9   | 9   |
| Q6P5F9 | Exportin-1 (Exp1) (Chromosome region maintenance 1 protein homolog)                                                                                                                                    | Xpo1 (Crm1)                                    | 19  | 43  | 9   | 9   |
| Q9DAI4 | Zinc finger and BTB domain-containing protein 43 (Zinc finger protein 297B)                                                                                                                            | Zbtb43<br>(Kiaa0414)<br>(Zfp297b)<br>(Znf297b) | 23  | 51  | 9   | 9   |
| Q9CQ60 | 6-phosphogluconolactonase (6PGL) (EC 3.1.1.31)                                                                                                                                                         | Pgls                                           | 148 | 41  | 11  | 11  |

|        |                                                                                                                                                                          |                                       |      |      |     |     |
|--------|--------------------------------------------------------------------------------------------------------------------------------------------------------------------------|---------------------------------------|------|------|-----|-----|
| O09061 | Proteasome subunit beta type-1 (EC 3.4.25.1) (Proteasome component C5) (Macropain subunit C5) (Multicatalytic endopeptidase complex subunit C5) (Proteasome gamma chain) | Psmb1                                 | 84   | 94   | 11  | 11  |
| Q9DB77 | Cytochrome b-c1 complex subunit 2, mitochondrial (Ubiquinol-cytochrome-c reductase complex core protein 2) (Core protein II) (Complex III subunit 2)                     | Uqcrc2                                | 29   | 20   | 13  | 13  |
| Q9JIF7 | Coatomer subunit beta (Beta-coat protein) (Beta-COP)                                                                                                                     | Copb1 (Copb)                          | 37   | 22   | 15  | 15  |
| P25206 | DNA replication licensing factor MCM3 (DNA polymerase alpha holoenzyme-associated protein P1) (P1-MCM3)                                                                  | Mcm3 (Mcmd) (Mcmd3)                   | 74   | 185  | 15  | 15  |
| Q01098 | Glutamate [NMDA] receptor subunit epsilon-3 (N-methyl D-aspartate receptor subtype 2C) (NMDAR2C) (NR2C)                                                                  | Grin2c                                | 18   | 33   | 15  | 15  |
| Q8R4K2 | Interleukin-1 receptor-associated kinase 4 (IRAK-4) (EC 2.7.11.1)                                                                                                        | Irak4                                 | 32   | 47   | 22  | 22  |
| P30681 | High mobility group protein B2 (High mobility group protein 2) (HMG-2)                                                                                                   | Hmgb2 (Hmg2)                          | 94   | 222  | 24  | 24  |
| Q80UK8 | Integrator complex subunit 2 (Int2)                                                                                                                                      | Ints2 (Kiaa1287)                      | 16   | 27   | 24  | 24  |
| Q62261 | Spectrin beta chain, brain 1 (Spectrin, non-erythroid beta chain 1) (Beta-II spectrin) (Fodrin beta chain) (Embryonic liver fodrin)                                      | Sptbn1 (Elf) (Spnb-2) (Spnb2) (Sptb2) | 56   | 54   | 48  | 48  |
| P11499 | Heat shock protein HSP 90-beta (HSP 84) (Tumor-specific transplantation 84 kDa antigen) (TSTA)                                                                           | Hsp90ab1 (Hsp84) (Hsp84-1) (Hspcb)    | 2943 | 3523 | 208 | 205 |
| P58252 | Elongation factor 2 (EF-2)                                                                                                                                               | Eef2                                  | 1630 | 1718 | 128 | 126 |
| Q91YE5 | Bromodomain adjacent to zinc finger domain protein 2A (Transcription termination factor I-interacting protein 5) (TTF-I-interacting protein 5) (Tip5)                    | Baz2a (Tip5)                          | 36   | 15   | 56  | 55  |

|        |                                                                                                                                                                                                              |                                        |     |     |    |    |
|--------|--------------------------------------------------------------------------------------------------------------------------------------------------------------------------------------------------------------|----------------------------------------|-----|-----|----|----|
| P23116 | Eukaryotic translation initiation factor 3 subunit A (eIF3a) (Eukaryotic translation initiation factor 3 subunit 10) (eIF-3-theta) (eIF3 p167) (eIF3 p180) (eIF3 p185) (p162) (Centrosomin)                  | Eif3a (Csma) (Eif3) (Eif3s10)          | 199 | 166 | 58 | 56 |
| O08638 | Myosin-11 (Myosin heavy chain 11) (Myosin heavy chain, smooth muscle isoform) (SMMHC)                                                                                                                        | Myh11                                  | 211 | 221 | 79 | 76 |
| Q8R4B8 | NACHT, LRR and PYD domains-containing protein 3 (Cold autoinflammatory syndrome 1 protein homolog) (Cryopyrin) (PYRIN-containing APAF1-like protein 1) (Mast cell maturation-associated-inducible protein 1) | Nlrp3 (Cias1) (Mmig1) (Nalp3) (Pypaf1) | 30  | 20  | 24 | 23 |
| P16406 | Glutamyl aminopeptidase (EC 3.4.11.7) (EAP) (Aminopeptidase A) (APA) (BP-1/6C3 antigen) (CD antigen CD249)                                                                                                   | Enpep                                  | 98  | 90  | 48 | 46 |
| Q8BGQ7 | Alanyl-tRNA synthetase, cytoplasmic (EC 6.1.1.7) (Alanine--tRNA ligase) (AlaRS)                                                                                                                              | Aars                                   | 179 | 216 | 23 | 22 |
| Q8R1B4 | Eukaryotic translation initiation factor 3 subunit C (eIF3c) (Eukaryotic translation initiation factor 3 subunit 8) (eIF3 p110)                                                                              | Eif3c (Eif3s8)                         | 34  | 63  | 22 | 21 |
| Q6ZPK0 | PHD finger protein 21A (BRAF35-HDAC complex protein BHC80) (mBHC80) (BHC80a)                                                                                                                                 | Phf21a (Bhc80) (Kiaa1696) (Pftf1)      | 28  | 37  | 20 | 19 |
| P03966 | N-myc proto-oncogene protein                                                                                                                                                                                 | Mycn (Nmyc) (Nmyc1)                    | 65  | 46  | 18 | 17 |
| Q8BTI8 | Serine/arginine repetitive matrix protein 2                                                                                                                                                                  | Srrm2 (Kiaa0324)                       | 78  | 70  | 92 | 86 |
| Q9CPR4 | 60S ribosomal protein L17                                                                                                                                                                                    | Rpl17                                  | 187 | 135 | 15 | 14 |
| Q7TMY8 | E3 ubiquitin-protein ligase HUWE1 (EC 6.3.2.-) (HECT, UBA and WWE domain-containing protein 1) (Upstream regulatory element-binding protein 1) (URE-binding protein 1) (URE-B1) (E3Histone)                  | Huwe1 (Kiaa0312) (Ureb1)               | 33  | 91  | 39 | 36 |

|        |                                                                                                                                                                                                                     |                    |     |     |     |     |
|--------|---------------------------------------------------------------------------------------------------------------------------------------------------------------------------------------------------------------------|--------------------|-----|-----|-----|-----|
| P35969 | Vascular endothelial growth factor receptor 1 (VEGFR-1) (EC 2.7.10.1) (Tyrosine-protein kinase receptor FLT) (FLT-1) (Embryonic receptor kinase 2)                                                                  | Flt1 (Emrk2) (Flt) | 29  | 36  | 35  | 32  |
| Q01853 | Transitional endoplasmic reticulum ATPase (TER ATPase) (15S Mg(2+)-ATPase p97 subunit) (Valosin-containing protein) (VCP)                                                                                           | Vcp                | 691 | 699 | 56  | 51  |
| Q9WTR0 | Matrix metalloproteinase-16 (MMP-16) (EC 3.4.24.-) (Membrane-type matrix metalloproteinase 3) (MT-MMP 3) (MTMMP3) (Membrane-type-3 matrix metalloproteinase) (MT3-MMP) (MT3MMP)                                     | Mmp16              | 17  | 36  | 11  | 10  |
| Q8CGC7 | Bifunctional aminoacyl-tRNA synthetase [Includes: Glutamyl-tRNA synthetase (EC 6.1.1.17) (Glutamate--tRNA ligase); Prolyl-tRNA synthetase (EC 6.1.1.15) (Proline--tRNA ligase)]                                     | Eprs (Qprs)        | 130 | 102 | 32  | 29  |
| Q8VDD5 | Myosin-9 (Myosin heavy chain 9) (Myosin heavy chain, non-muscle IIa) (Non-muscle myosin heavy chain IIa) (NMMHC II-a) (NMMHC-IIA) (Cellular myosin heavy chain, type A) (Non-muscle myosin heavy chain-A) (NMMHC-A) | Myh9               | 780 | 839 | 127 | 115 |
| Q9QZH3 | Peptidyl-prolyl cis-trans isomerase E (PPIase E) (Rotamase E) (EC 5.2.1.8) (Cyclophilin E) (Cyclophilin-33)                                                                                                         | Ppie (Cyp33)       | 28  | 35  | 10  | 9   |
| Q925Q8 | Dachshund homolog 2 (Dach2)                                                                                                                                                                                         | Dach2              | 22  | 30  | 9   | 8   |
| P43277 | Histone H1.3 (H1 VAR.4) (H1d)                                                                                                                                                                                       | Hist1h1d (H1f3)    | 78  | 99  | 18  | 16  |
| Q68FD5 | Clathrin heavy chain 1                                                                                                                                                                                              | Cltc               | 944 | 884 | 88  | 78  |
| Q9DBJ1 | Phosphoglycerate mutase 1 (EC 5.4.2.1) (EC 5.4.2.4) (EC 3.1.3.13) (Phosphoglycerate mutase isozyme B) (PGAM-B) (BPG-dependent PGAM 1)                                                                               | Pgam1              | 612 | 746 | 35  | 31  |

|        |                                                                                                                                                                 |                                    |     |      |    |    |
|--------|-----------------------------------------------------------------------------------------------------------------------------------------------------------------|------------------------------------|-----|------|----|----|
| Q8BG95 | Protein phosphatase 1 regulatory subunit 12B (Myosin phosphatase-targeting subunit 2)                                                                           | Ppp1r12b (Mypt2)                   | 25  | 24   | 25 | 22 |
| Q9R0P5 | Destrin (Actin-depolymerizing factor) (ADF) (Sid 23)                                                                                                            | Dstn (Dsn) (Sid23)                 | 61  | 81   | 8  | 7  |
| P70195 | Proteasome subunit beta type-7 (EC 3.4.25.1) (Proteasome subunit Z) (Macropain chain Z) (Multicatalytic endopeptidase complex chain Z)                          | Psmb7 (Mmc14)                      | 39  | 40   | 8  | 7  |
| Q02053 | Ubiquitin-like modifier-activating enzyme 1 (Ubiquitin-activating enzyme E1) (Ubiquitin-like modifier-activating enzyme 1 X) (Ubiquitin-activating enzyme E1 X) | Uba1 (Sbx) (Ube1) (Ube1ax) (Ube1x) | 660 | 1086 | 63 | 55 |
| Q8VHE6 | Dynein heavy chain 5, axonemal (Axonemal beta dynein heavy chain 5) (Mdnah5) (Ciliary dynein heavy chain 5)                                                     | Dnah5 (Dnahc5)                     | 47  | 44   | 83 | 72 |
| P21550 | Beta-enolase (EC 4.2.1.11) (2-phospho-D-glycerate hydro-lyase) (Muscle-specific enolase) (MSE) (Skeletal muscle enolase) (Enolase 3)                            | Eno3 (Eno-3)                       | 313 | 146  | 30 | 26 |
| Q11011 | Puromycin-sensitive aminopeptidase (PSA) (EC 3.4.11.-)                                                                                                          | Npepps (Psa)                       | 71  | 141  | 30 | 26 |
| Q9Z1Q9 | Valyl-tRNA synthetase (EC 6.1.1.9) (Valine--tRNA ligase) (ValRS) (Protein G7a)                                                                                  | Vars (Bat6) (G7a) (Vars2)          | 380 | 302  | 37 | 32 |
| Q9JJK8 | Serine/threonine-protein kinase ATR (EC 2.7.11.1) (Ataxia telangiectasia and Rad3-related protein)                                                              | Atr                                | 20  | 25   | 72 | 62 |
| Q9D868 | Peptidyl-prolyl cis-trans isomerase H (PPIase H) (Rotamase H) (EC 5.2.1.8)                                                                                      | Ppih                               | 55  | 31   | 7  | 6  |
| P67984 | 60S ribosomal protein L22 (Heparin-binding protein HBp15)                                                                                                       | Rpl22                              | 59  | 48   | 7  | 6  |
| O88866 | Hormonally up-regulated neu tumor-associated kinase (EC 2.7.11.1) (Serine/threonine-protein kinase MAK-V)                                                       | Hunk (Makv)                        | 27  | 21   | 14 | 12 |
| P35979 | 60S ribosomal protein L12                                                                                                                                       | Rpl12                              | 208 | 389  | 14 | 12 |
| P97784 | Cryptochrome-1                                                                                                                                                  | Cry1                               | 52  | 42   | 21 | 18 |

|        |                                                                                                                                                                                                                                                                  |                                 |     |     |    |    |
|--------|------------------------------------------------------------------------------------------------------------------------------------------------------------------------------------------------------------------------------------------------------------------|---------------------------------|-----|-----|----|----|
| Q9R194 | Cryptochrome-2                                                                                                                                                                                                                                                   | Cry2<br>(Kiaa0658)              | 52  | 42  | 21 | 18 |
| Q9CZM2 | 60S ribosomal protein L15                                                                                                                                                                                                                                        | Rpl15                           | 225 | 107 | 21 | 18 |
| P11881 | Inositol 1,4,5-trisphosphate receptor type 1<br>(Type 1 inositol 1,4,5-trisphosphate receptor)<br>(Type 1 InsP3 receptor) (IP3 receptor isoform 1)<br>(InsP3R1) (Inositol 1,4,5-trisphosphate-binding protein P400) (Purkinje cell protein 1)<br>(Protein PCD-6) | Itpr1 (Insp3r)<br>(Pcd6) (Pcp1) | 37  | 42  | 48 | 41 |
| Q6ZWN5 | 40S ribosomal protein S9                                                                                                                                                                                                                                         | Rps9                            | 459 | 248 | 47 | 40 |
| Q9JM52 | Misshapen-like kinase 1 (EC 2.7.11.1)<br>(Mitogen-activated protein kinase kinase kinase kinase 6) (MAPK/ERK kinase kinase 6) (MEK kinase kinase 6) (MEKKK 6)<br>(Misshapen/NIK-related kinase) (GCK family kinase MiNK)                                         | Mink1<br>(Map4k6)<br>(Mink)     | 18  | 54  | 13 | 11 |
| Q9CQN1 | Heat shock protein 75 kDa, mitochondrial<br>(HSP 75) (Tumor necrosis factor type 1 receptor-associated protein) (TRAP-1) (TNFR-associated protein 1)                                                                                                             | Trap1 (Hsp75)                   | 197 | 335 | 13 | 11 |
| P14131 | 40S ribosomal protein S16                                                                                                                                                                                                                                        | Rps16                           | 160 | 126 | 19 | 16 |
| P20029 | 78 kDa glucose-regulated protein (GRP 78)<br>(Heat shock 70 kDa protein 5)<br>(Immunoglobulin heavy chain-binding protein)<br>(BiP)                                                                                                                              | Hspa5 (Grp78)                   | 262 | 312 | 25 | 21 |
| Q99PP7 | E3 ubiquitin-protein ligase TRIM33 (EC 6.3.2.-)<br>(Tripartite motif-containing protein 33)<br>(Transcription intermediary factor 1-gamma)<br>(TIF1-gamma) (Ectodermin homolog)                                                                                  | Trim33<br>(Kiaa1113)            | 33  | 25  | 12 | 10 |
| Q05816 | Fatty acid-binding protein, epidermal (E-FABP)<br>(Fatty acid-binding protein 5) (Psoriasis-associated fatty acid-binding protein homolog)<br>(PA-FABP) (Keratinocyte lipid-binding protein)                                                                     | Fabp5 (Fabpe)<br>(Klbp) (Mal1)  | 331 | 206 | 18 | 15 |



|        |                                                                                                                                                                                        |                               |     |     |    |    |
|--------|----------------------------------------------------------------------------------------------------------------------------------------------------------------------------------------|-------------------------------|-----|-----|----|----|
| P11983 | T-complex protein 1 subunit alpha B (TCP-1-alpha) (CCT-alpha) (Tailless complex polypeptide 1B) (TCP-1-B)                                                                              | Cct1 (Ccta) (Tcp1)            | 29  | 66  | 18 | 15 |
| Q64514 | Tripeptidyl-peptidase 2 (EC 3.4.14.10) (Tripeptidyl-peptidase II) (TPP-II) (Tripeptidyl aminopeptidase)                                                                                | Tpp2                          | 54  | 76  | 24 | 20 |
| P20357 | Microtubule-associated protein 2 (MAP-2)                                                                                                                                               | Map2 (Mtap2)                  | 50  | 22  | 30 | 25 |
| P11531 | Dystrophin                                                                                                                                                                             | Dmd                           | 25  | 16  | 66 | 55 |
| Q91XQ0 | Dynein heavy chain 8, axonemal (Axonemal beta dynein heavy chain 8) (Ciliary dynein heavy chain 8)                                                                                     | Dnahc8                        | 47  | 51  | 77 | 64 |
| P80316 | T-complex protein 1 subunit epsilon (TCP-1-epsilon) (CCT-epsilon)                                                                                                                      | Cct5 (Ccte) (Kiaa0098)        | 239 | 102 | 17 | 14 |
| Q6DFV7 | Nuclear receptor coactivator 7                                                                                                                                                         | Ncoa7                         | 25  | 16  | 11 | 9  |
| P14206 | 40S ribosomal protein SA (Laminin receptor 1) (p40) (34/67 kDa laminin receptor) (37 kDa oncofetal antigen) (OFA/iLRP)                                                                 | Rpsa (Lamr1) (P40-8)          | 131 | 112 | 11 | 9  |
| Q6ZQ38 | Cullin-associated NEDD8-dissociated protein 1 (Cullin-associated and neddylation-dissociated protein 1) (p120 CAND1)                                                                   | Cand1 (D10Erd516e) (Kiaa0829) | 221 | 246 | 33 | 27 |
| P42227 | Signal transducer and activator of transcription 3 (Acute-phase response factor)                                                                                                       | Stat3 (Aprf)                  | 16  | 28  | 33 | 27 |
| Q569Z5 | Probable ATP-dependent RNA helicase DDX46 (EC 3.6.1.-) (DEAD box protein 46)                                                                                                           | Ddx46 (Kiaa0801)              | 25  | 17  | 21 | 17 |
| Q80ZW0 | Serine/threonine-protein kinase 35 (EC 2.7.11.1)                                                                                                                                       | Stk35                         | 14  | 50  | 21 | 17 |
| Q64512 | Tyrosine-protein phosphatase non-receptor type 13 (EC 3.1.3.48) (Protein tyrosine phosphatase PTP-BL) (Protein-tyrosine phosphatase RIP) (Protein tyrosine phosphatase DPZPTP) (PTP36) | Ptpn13 (Ptp14)                | 28  | 27  | 26 | 21 |
| Q62407 | Striated muscle-specific serine/threonine protein kinase (EC 2.7.11.1) (Aortic preferentially expressed protein 1) (APEG-1)                                                            | Speg (Apeg1) (Kiaa1297)       | 26  | 20  | 31 | 25 |

|        |                                                                                                                                                 |                                        |     |     |     |     |
|--------|-------------------------------------------------------------------------------------------------------------------------------------------------|----------------------------------------|-----|-----|-----|-----|
| P17182 | Alpha-enolase (EC 4.2.1.11) (2-phospho-D-glycerate hydro-lyase) (Non-neural enolase) (NNE) (Enolase 1)                                          | Eno1 (Eno-1)                           | 976 | 802 | 62  | 50  |
| Q5XJY5 | Coatomer subunit delta (Delta-coat protein) (Delta-COP) (Archain)                                                                               | Arcn1 (Copd)                           | 61  | 45  | 10  | 8   |
| P54923 | [Protein ADP-ribosylarginine] hydrolase (ADP-ribosylarginine hydrolase) (EC 3.2.2.19) (ADP-ribose-L-arginine cleaving enzyme)                   | Adprh (Arh1)                           | 20  | 41  | 15  | 12  |
| P00342 | L-lactate dehydrogenase C chain (LDH-C) (EC 1.1.1.27) (LDH testis subunit) (LDH-X)                                                              | Ldhc (Ldh-3) (Ldh3)                    | 97  | 122 | 15  | 12  |
| Q9Z2U0 | Proteasome subunit alpha type-7 (EC 3.4.25.1) (Proteasome subunit RC6-1)                                                                        | PsmA7                                  | 121 | 253 | 15  | 12  |
| P12970 | 60S ribosomal protein L7a (Surfeit locus protein 3)                                                                                             | Rpl7a (Surf-3) (Surf3)                 | 111 | 31  | 15  | 12  |
| Q99MD9 | Nuclear autoantigenic sperm protein (NASP)                                                                                                      | Nasp                                   | 365 | 293 | 34  | 27  |
| Q8BP67 | 60S ribosomal protein L24                                                                                                                       | Rpl24                                  | 354 | 214 | 24  | 19  |
| Q80Z16 | E3 ubiquitin-protein ligase LRSAM1 (EC 6.3.2.-) (Leucine-rich repeat and sterile alpha motif-containing protein 1) (Tsg101-associated ligase)   | Lrsam1                                 | 19  | 35  | 19  | 15  |
| Q80UN9 | tRNA isopentenyltransferase, mitochondrial (IPTase) (EC 2.5.1.8) (Isopentenyl-diphosphate:tRNA isopentenyltransferase) (IPP transferase) (IPPT) | Trit1 (Ipt)                            | 31  | 24  | 19  | 15  |
| P62754 | 40S ribosomal protein S6 (Phosphoprotein NP33)                                                                                                  | Rps6                                   | 127 | 283 | 19  | 15  |
| Q9QWL7 | Keratin, type I cytoskeletal 17 (Cytokeratin-17) (CK-17) (Keratin-17) (K17)                                                                     | Krt17 (Krt1-17)                        | 38  | 46  | 14  | 11  |
| Q9JHU4 | Cytoplasmic dynein 1 heavy chain 1 (Cytoplasmic dynein heavy chain 1) (Dynein heavy chain, cytosolic)                                           | Dync1h1 (Dhc1) (Dnch1) (Dnchc1) (Dyhc) | 822 | 395 | 157 | 123 |

|        |                                                                                                                                                                                                                                        |                               |      |     |    |    |
|--------|----------------------------------------------------------------------------------------------------------------------------------------------------------------------------------------------------------------------------------------|-------------------------------|------|-----|----|----|
| Q6A078 | Centrosomal protein of 290 kDa (Cep290) (Nephrocystin-6)                                                                                                                                                                               | Cep290 (Kiaa0373) (Nphp6)     | 32   | 57  | 85 | 66 |
| P31254 | Ubiquitin-like modifier-activating enzyme 1 Y (Ubiquitin-activating enzyme E1 Y) (Ubiquitin-activating enzyme E1)                                                                                                                      | Ube1ay (Sby) (Ube1y) (Ube1y1) | 161  | 77  | 22 | 17 |
| P06151 | L-lactate dehydrogenase A chain (LDH-A) (EC 1.1.1.27) (LDH muscle subunit) (LDH-M)                                                                                                                                                     | Ldha (Ldh-1) (Ldh1)           | 1033 | 421 | 74 | 57 |
| P05063 | Fructose-bisphosphate aldolase C (EC 4.1.2.13) (Brain-type aldolase) (Aldolase 3) (Zebrin II) (Scrapie-responsive protein 2)                                                                                                           | Aldoc (Aldo3) (Scrg2)         | 35   | 51  | 13 | 10 |
| Q8CGK3 | Lon protease homolog, mitochondrial (EC 3.4.21.-) (Lon protease-like protein) (LONP) (Mitochondrial ATP-dependent protease Lon) (Serine protease 15)                                                                                   | Lonp1 (Prss15)                | 21   | 30  | 43 | 33 |
| P62702 | 40S ribosomal protein S4, X isoform                                                                                                                                                                                                    | Rps4x (Rps4)                  | 402  | 304 | 30 | 23 |
| Q8JZQ2 | AFG3-like protein 2 (EC 3.4.24.-)                                                                                                                                                                                                      | Afg3l2                        | 15   | 27  | 17 | 13 |
| P47856 | Glucosamine--fructose-6-phosphate aminotransferase [isomerizing] 1 (EC 2.6.1.16) (Glutamine:fructose 6 phosphate amidotransferase 1) (GFAT 1) (GFAT1) (D-fructose-6-phosphate amidotransferase 1) (Hexosephosphate aminotransferase 1) | Gfpt1 (Gfpt)                  | 17   | 29  | 17 | 13 |
| Q569Z6 | Thyroid hormone receptor-associated protein 3 (Thyroid hormone receptor-associated protein complex 150 kDa component) (Trap150)                                                                                                        | Thrap3 (Trap150)              | 29   | 48  | 21 | 16 |
| Q99MY8 | Probable histone-lysine N-methyltransferase ASH1L (EC 2.1.1.43) (Absent small and homeotic disks protein 1 homolog) (ASH1-like protein)                                                                                                | Ash1l                         | 19   | 31  | 46 | 35 |
| P70670 | Nascent polypeptide-associated complex subunit alpha, muscle-specific form (Alpha-NAC, muscle-specific form)                                                                                                                           | Naca (Gm1878)                 | 22   | 130 | 29 | 22 |

|        |                                                                                                                                               |                                                   |     |     |    |    |
|--------|-----------------------------------------------------------------------------------------------------------------------------------------------|---------------------------------------------------|-----|-----|----|----|
| P16627 | Heat shock 70 kDa protein 1L (Heat shock 70 kDa protein 1-like) (Heat shock 70 kDa-like protein 1) (Spermatid-specific heat shock protein 70) | Hspa1l (Hsc70t)                                   | 319 | 238 | 33 | 25 |
| Q02956 | Protein kinase C zeta type (EC 2.7.11.13) (nPKC-zeta)                                                                                         | Prkcz (PkcZ)                                      | 29  | 15  | 8  | 6  |
| P25233 | Necdin                                                                                                                                        | Ndn                                               | 30  | 23  | 16 | 12 |
| P62751 | 60S ribosomal protein L23a                                                                                                                    | Rpl23a                                            | 75  | 49  | 16 | 12 |
| Q8K1F9 | Lactase-like protein (Klotho/lactase-phlorizin hydrolase-related protein)                                                                     | Lctl (Klph)                                       | 27  | 21  | 24 | 18 |
| Q8K045 | Serine/threonine-protein kinase N3 (EC 2.7.11.13) (Protein kinase PKN-beta) (Protein-kinase C-related kinase 3)                               | Pkn3 (Pknbeta)                                    | 130 | 126 | 36 | 27 |
| Q6P3Y5 | Zinc finger protein 280C (Suppressor of hairy wing homolog 3)                                                                                 | Znf280c (Kiaa1584) (Suhw3) (Zfp280c)              | 87  | 142 | 43 | 32 |
| P58681 | Toll-like receptor 7                                                                                                                          | Tlr7                                              | 27  | 33  | 23 | 17 |
| P62264 | 40S ribosomal protein S14                                                                                                                     | Rps14                                             | 163 | 166 | 15 | 11 |
| P25444 | 40S ribosomal protein S2 (S4) (LLRep3 protein)                                                                                                | Rps2 (Llrep3) (Rps4)                              | 217 | 50  | 26 | 19 |
| Q61656 | Probable ATP-dependent RNA helicase DDX5 (EC 3.6.1.-) (DEAD box protein 5) (RNA helicase p68) (DEAD box RNA helicase DEAD1) (mDEAD1)          | Ddx5 (Tnz2)                                       | 90  | 43  | 11 | 8  |
| P62991 | Ubiquitin                                                                                                                                     | Rps27a (Uba80) (Ubcep1); Uba52 (Ubcep2); Ubb; Ubc | 61  | 54  | 11 | 8  |
| Q61696 | Heat shock 70 kDa protein 1A (Heat shock 70 kDa protein 3) (HSP70.3) (Hsp68)                                                                  | Hspa1a (Hsp70-3) (Hsp70A1)                        | 266 | 236 | 33 | 24 |
| Q9CR57 | 60S ribosomal protein L14                                                                                                                     | Rpl14                                             | 508 | 391 | 33 | 24 |

|        |                                                                                                                                                                                                   |                                    |      |     |    |    |
|--------|---------------------------------------------------------------------------------------------------------------------------------------------------------------------------------------------------|------------------------------------|------|-----|----|----|
| Q61699 | Heat shock protein 105 kDa (Heat shock-related 100 kDa protein E7I) (HSP-E7I) (Heat shock 110 kDa protein) (42 degrees C-HSP)                                                                     | Hsph1 (Hsp105) (Hsp110) (Kiaa0201) | 46   | 48  | 18 | 13 |
| P27659 | 60S ribosomal protein L3 (J1 protein)                                                                                                                                                             | Rpl3                               | 192  | 75  | 25 | 18 |
| Q99LG2 | Transportin-2 (Karyopherin beta-2b)                                                                                                                                                               | Tnpo2                              | 42   | 32  | 7  | 5  |
| Q60673 | Receptor-type tyrosine-protein phosphatase-like N (R-PTP-N) (PTP IA-2)                                                                                                                            | Ptpn (Ptp35)                       | 30   | 18  | 14 | 10 |
| P14148 | 60S ribosomal protein L7                                                                                                                                                                          | Rpl7                               | 145  | 52  | 14 | 10 |
| Q03172 | Zinc finger protein 40 (Transcription factor alphaA-CRYBP1) (Alpha A-crystallin-binding protein I) (Alpha A-CRYBP1)                                                                               | Hivep1 (Cryabp1) (Znf40)           | 25   | 24  | 21 | 15 |
| P14869 | 60S acidic ribosomal protein P0 (L10E)                                                                                                                                                            | Rplp0 (Arbp)                       | 115  | 334 | 28 | 20 |
| P17751 | Triosephosphate isomerase (TIM) (EC 5.3.1.1) (Triose-phosphate isomerase)                                                                                                                         | Tpi1 (Tpi)                         | 706  | 519 | 35 | 25 |
| Q60692 | Proteasome subunit beta type-6 (EC 3.4.25.1) (Proteasome delta chain) (Macropain delta chain) (Multicatalytic endopeptidase complex delta chain) (Proteasome subunit Y)                           | Psm6 (Lmp19)                       | 33   | 89  | 17 | 12 |
| P51410 | 60S ribosomal protein L9                                                                                                                                                                          | Rpl9                               | 187  | 212 | 17 | 12 |
| Q8BMJ2 | Leucyl-tRNA synthetase, cytoplasmic (EC 6.1.1.4) (Leucine--tRNA ligase) (LeuRS)                                                                                                                   | Lars                               | 52   | 45  | 47 | 33 |
| Q7TQI3 | Ubiquitin thioesterase OTUB1 (EC 3.1.2.-) (Otubain-1) (OTU domain-containing ubiquitin aldehyde-binding protein 1) (Ubiquitin-specific-processing protease OTUB1) (Deubiquitinating enzyme OTUB1) | Otub1                              | 152  | 109 | 10 | 7  |
| Q91YJ5 | Translation initiation factor IF-2, mitochondrial (IF-2Mt) (IF2(mt)) (IF-2(Mt))                                                                                                                   | Mtif2                              | 29   | 23  | 13 | 9  |
| Q52KI8 | Serine/arginine repetitive matrix protein 1 (Plenty-of-prolines 101)                                                                                                                              | Srrm1 (Pop101)                     | 22   | 73  | 29 | 20 |
| Q99PV0 | Pre-mRNA-processing-splicing factor 8 (Splicing factor Prp8)                                                                                                                                      | Prpf8 (Prp8)                       | 28   | 29  | 51 | 35 |
| Q9CWF2 | Tubulin beta-2B chain                                                                                                                                                                             | Tubb2b                             | 1435 | 825 | 86 | 59 |
| P99024 | Tubulin beta-5 chain                                                                                                                                                                              | Tubb5                              | 1377 | 976 | 88 | 60 |

|        |                                                                                                                                                                               |                              |      |     |    |    |
|--------|-------------------------------------------------------------------------------------------------------------------------------------------------------------------------------|------------------------------|------|-----|----|----|
| Q80TP3 | E3 ubiquitin-protein ligase UBR5 (EC 6.3.2.-) (E3 ubiquitin-protein ligase, HECT domain-containing 1) (Hyperplastic discs protein homolog)                                    | Ubr5 (Edd) (Edd1) (Kiaa0896) | 27   | 17  | 43 | 29 |
| Q6PHN9 | Ras-related protein Rab-35                                                                                                                                                    | Rab35                        | 17   | 59  | 3  | 2  |
| Q8C9S8 | Cysteine protease ATG4A (EC 3.4.22.-) (Autophagy-related protein 4 homolog A) (Autophagin-2) (Autophagy-related cysteine endopeptidase 2) (AUT-like 2 cysteine endopeptidase) | Atg4a (Apg4a) (Autl2)        | 26   | 21  | 6  | 4  |
| P43275 | Histone H1.1 (H1 VAR.3) (H1a)                                                                                                                                                 | Hist1h1a (H1f1)              | 28   | 90  | 9  | 6  |
| P61979 | Heterogeneous nuclear ribonucleoprotein K (hnRNP K)                                                                                                                           | Hnrnpk (Hnrpk)               | 225  | 46  | 18 | 12 |
| Q8K4L3 | Supervillin (Archvillin) (p205/p250)                                                                                                                                          | Svil                         | 25   | 22  | 18 | 12 |
| P68372 | Tubulin beta-2C chain                                                                                                                                                         | Tubb2c                       | 1300 | 891 | 78 | 51 |
| P42932 | T-complex protein 1 subunit theta (TCP-1-theta) (CCT-theta)                                                                                                                   | Cct8 (Cctq)                  | 197  | 57  | 23 | 15 |
| Q924W6 | Tripartite motif-containing protein 66 (Transcriptional intermediary factor 1 delta)                                                                                          | Trim66 (Tif1d)               | 28   | 18  | 23 | 15 |
| O70435 | Proteasome subunit alpha type-3 (EC 3.4.25.1) (Proteasome component C8) (Macropain subunit C8) (Multicatalytic endopeptidase complex subunit C8) (Proteasome subunit K)       | Psma3                        | 95   | 76  | 14 | 9  |
| Q9CXW4 | 60S ribosomal protein L11                                                                                                                                                     | Rpl11                        | 72   | 79  | 11 | 7  |
| Q8CG48 | Structural maintenance of chromosomes protein 2 (Chromosome-associated protein E) (XCAP-E homolog) (FGF-inducible protein 16)                                                 | Smc2 (Cape) (Fin16) (Smc2l1) | 32   | 36  | 41 | 26 |
| Q7TMM9 | Tubulin beta-2A chain                                                                                                                                                         | Tubb2a (Tubb2)               | 1422 | 775 | 83 | 52 |
| Q9QZ09 | Putative homeodomain transcription factor 1                                                                                                                                   | Phtf1 (Phtf)                 | 29   | 24  | 8  | 5  |

|        |                                                                                                                                                                                                                               |                           |     |     |    |    |
|--------|-------------------------------------------------------------------------------------------------------------------------------------------------------------------------------------------------------------------------------|---------------------------|-----|-----|----|----|
| Q80U87 | Ubiquitin carboxyl-terminal hydrolase 8 (EC 3.1.2.15) (Ubiquitin thioesterase 8) (Ubiquitin-specific-processing protease 8) (Deubiquitinating enzyme 8) (mUBPy)                                                               | Usp8 (Kiaa0055) (UbpY)    | 29  | 23  | 24 | 15 |
| P62717 | 60S ribosomal protein L18a                                                                                                                                                                                                    | Rpl18a                    | 242 | 62  | 21 | 13 |
| P16125 | L-lactate dehydrogenase B chain (LDH-B) (EC 1.1.1.27) (LDH heart subunit) (LDH-H)                                                                                                                                             | Ldhb (Ldh-2) (Ldh2)       | 315 | 214 | 34 | 21 |
| P17156 | Heat shock-related 70 kDa protein 2 (Heat shock protein 70.2)                                                                                                                                                                 | Hspa2 (Hcp70.2) (Hsp70-2) | 964 | 544 | 60 | 37 |
| P84099 | 60S ribosomal protein L19                                                                                                                                                                                                     | Rpl19                     | 39  | 47  | 13 | 8  |
| P62301 | 40S ribosomal protein S13                                                                                                                                                                                                     | Rps13                     | 77  | 100 | 23 | 14 |
| O88291 | Zinc finger protein 326 (Zinc finger protein-associated with nuclear matrix of 75 kDa)                                                                                                                                        | Znf326 (Zan75) (Zfp326)   | 41  | 55  | 5  | 3  |
| Q9D1R9 | 60S ribosomal protein L34                                                                                                                                                                                                     | Rpl34                     | 34  | 32  | 10 | 6  |
| Q9EQZ6 | Rap guanine nucleotide exchange factor 4 (cAMP-regulated guanine nucleotide exchange factor II) (cAMP-GEFII) (Exchange factor directly activated by cAMP 2) (Epac 2) (cAMP-dependent Rap1 guanine-nucleotide exchange factor) | Rapgef4 (Cgef2) (Epac2)   | 47  | 23  | 20 | 12 |
| Q8R4K8 | Pappalysin-1 (EC 3.4.24.79) (Pregnancy-associated plasma protein A) (PAPP-A) (Insulin-like growth factor-dependent IGF-binding protein 4 protease) (IGF-dependent IGFBP-4 protease) (IGFBP-4ase)                              | Pappa                     | 41  | 43  | 25 | 15 |
| Q6NZJ6 | Eukaryotic translation initiation factor 4 gamma 1 (eIF-4-gamma 1) (eIF-4G 1) (eIF-4G1)                                                                                                                                       | Eif4g1                    | 47  | 113 | 30 | 18 |
| P63038 | 60 kDa heat shock protein, mitochondrial (Heat shock protein 60) (HSP-60) (Hsp60) (60 kDa chaperonin) (Chaperonin 60) (CPN60) (Mitochondrial matrix protein P1) (HSP-65)                                                      | Hspd1 (Hsp60)             | 15  | 32  | 22 | 13 |

|        |                                                                                                                                                      |                             |      |     |     |    |
|--------|------------------------------------------------------------------------------------------------------------------------------------------------------|-----------------------------|------|-----|-----|----|
| P80317 | T-complex protein 1 subunit zeta (TCP-1-zeta) (CCT-zeta) (CCT-zeta-1)                                                                                | Cct6a (Cct6) (Cctz) (Cctz1) | 160  | 52  | 22  | 13 |
| P10630 | Eukaryotic initiation factor 4A-II (eIF-4A-II) (eIF4A-II) (EC 3.6.1.-) (ATP-dependent RNA helicase eIF4A-2)                                          | Eif4a2 (Ddx2b)              | 194  | 78  | 17  | 10 |
| P09041 | Phosphoglycerate kinase 2 (EC 2.7.2.3) (Phosphoglycerate kinase, testis specific)                                                                    | Pgk2 (Pkg-2)                | 162  | 73  | 17  | 10 |
| P63017 | Heat shock cognate 71 kDa protein (Heat shock 70 kDa protein 8)                                                                                      | Hspa8 (Hsc70) (Hsc73)       | 1719 | 959 | 119 | 70 |
| P05532 | Mast/stem cell growth factor receptor (SCFR) (EC 2.7.10.1) (Proto-oncogene tyrosine-protein kinase Kit) (c-kit) (CD antigen CD117)                   | Kit (SI)                    | 16   | 35  | 12  | 7  |
| P62900 | 60S ribosomal protein L31                                                                                                                            | Rpl31                       | 124  | 62  | 12  | 7  |
| Q9JI78 | Peptide-N(4)-(N-acetyl-beta-glucosaminy)asparagine amidase (PNGase) (mPNGase) (EC 3.5.1.52) (Peptide:N-glycanase) (N-glycanase 1)                    | Ngly1                       | 29   | 32  | 19  | 11 |
| P41105 | 60S ribosomal protein L28                                                                                                                            | Rpl28                       | 49   | 41  | 19  | 11 |
| Q9CZX8 | 40S ribosomal protein S19                                                                                                                            | Rps19                       | 206  | 146 | 19  | 11 |
| P47963 | 60S ribosomal protein L13 (A52)                                                                                                                      | Rpl13                       | 744  | 379 | 47  | 27 |
| P53762 | Aryl hydrocarbon receptor nuclear translocator (ARNT protein) (Dioxin receptor, nuclear translocator) (Hypoxia-inducible factor 1 beta) (HIF-1 beta) | Arnt                        | 25   | 22  | 7   | 4  |
| P47757 | F-actin-capping protein subunit beta (CapZ beta)                                                                                                     | Capzb (Cappb1)              | 107  | 68  | 7   | 4  |
| P26043 | Radixin (ESP10)                                                                                                                                      | Rdx                         | 127  | 106 | 23  | 13 |
| P49722 | Proteasome subunit alpha type-2 (EC 3.4.25.1) (Proteasome component C3) (Macropain subunit C3) (Multicatalytic endopeptidase complex subunit C3)     | Psm2 (Lmpc3)                | 188  | 103 | 16  | 9  |



|        |                                                                                                                                                                                                                                     |                                |     |     |    |    |
|--------|-------------------------------------------------------------------------------------------------------------------------------------------------------------------------------------------------------------------------------------|--------------------------------|-----|-----|----|----|
| Q9R1X4 | Protein timeless homolog (mTim)                                                                                                                                                                                                     | Timeless (Tim1) (Timeless1)    | 22  | 25  | 16 | 9  |
| P97461 | 40S ribosomal protein S5                                                                                                                                                                                                            | Rps5                           | 89  | 33  | 32 | 18 |
| Q8K2I9 | F-box only protein 18 (EC 3.6.1.-) (F-box DNA helicase 1)                                                                                                                                                                           | Fbxo18 (Fbh1) (Fbx18)          | 30  | 23  | 9  | 5  |
| P63073 | Eukaryotic translation initiation factor 4E (eIF-4E) (eIF4E) (mRNA cap-binding protein) (eIF-4F 25 kDa subunit)                                                                                                                     | Eif4e                          | 110 | 25  | 9  | 5  |
| Q8BYH8 | Chromodomain-helicase-DNA-binding protein 9 (CHD-9) (EC 3.6.1.-) (ATP-dependent helicase CHD9) (Peroxisomal proliferator-activated receptor A-interacting complex 320 kDa protein) (PPAR-alpha-interacting complex protein 320 kDa) | Chd9 (Kiaa0308) (Pric320)      | 39  | 27  | 49 | 27 |
| P17918 | Proliferating cell nuclear antigen (PCNA) (Cyclin)                                                                                                                                                                                  | Pcna                           | 273 | 207 | 20 | 11 |
| O35664 | Interferon-alpha/beta receptor beta chain (Interferon alpha/beta receptor 2) (IFN-alpha-REC) (Type I interferon receptor) (IFN-R)                                                                                                   | Ifnar2                         | 37  | 21  | 11 | 6  |
| Q9WUJ8 | Origin recognition complex subunit 6                                                                                                                                                                                                | Orc6l (Orc6)                   | 59  | 37  | 13 | 7  |
| Q9D6F9 | Tubulin beta-4 chain                                                                                                                                                                                                                | Tubb4                          | 888 | 493 | 58 | 31 |
| O88844 | Isocitrate dehydrogenase [NADP] cytoplasmic (IDH) (EC 1.1.1.42) (Cytosolic NADP-isocitrate dehydrogenase) (Oxalosuccinate decarboxylase) (NADP(+)-specific ICDH) (IDP)                                                              | Idh1                           | 155 | 163 | 15 | 8  |
| Q61390 | T-complex protein 1 subunit zeta-2 (TCP-1-zeta-2) (CCT-zeta-2) (Cctz-2)                                                                                                                                                             | Cct6b                          | 55  | 52  | 15 | 8  |
| P11103 | Poly [ADP-ribose] polymerase 1 (PARP-1) (EC 2.4.2.30) (ADPRT) (NAD(+)-ADP-ribosyltransferase 1) (Poly[ADP-ribose] synthetase 1) (msPARP)                                                                                            | Parp1 (Adprp) (Adprt) (Adprt1) | 21  | 26  | 17 | 9  |
| Q922F4 | Tubulin beta-6 chain                                                                                                                                                                                                                | Tubb6                          | 583 | 382 | 40 | 21 |
| P97351 | 40S ribosomal protein S3a                                                                                                                                                                                                           | Rps3a                          | 899 | 392 | 50 | 26 |

|                                    |                                                                                    |                                                                                                                                                                                     |                |     |      |    |     |
|------------------------------------|------------------------------------------------------------------------------------|-------------------------------------------------------------------------------------------------------------------------------------------------------------------------------------|----------------|-----|------|----|-----|
|                                    | Q9ERD7                                                                             | Tubulin beta-3 chain                                                                                                                                                                | Tubb3          | 780 | 383  | 52 | 27  |
|                                    | Q80UE6                                                                             | Serine/threonine-protein kinase WNK4 (EC 2.7.11.1) (Protein kinase with no lysine 4) (Protein kinase, lysine-deficient 4)                                                           | Wnk4 (Prkwnk4) | 23  | 33   | 29 | 15  |
| cellular protein metabolic process | Q9CXW3                                                                             | Calcyclin-binding protein (CacyBP) (Siah-interacting protein)                                                                                                                       | Cacybp (Sip)   | 57  | 39   | 7  | 13  |
|                                    | Q7TSG3                                                                             | F-box only protein 5 (Early mitotic inhibitor 1)                                                                                                                                    | Fbxo5 (Emi1)   | 15  | 27   | 5  | 9   |
|                                    | Q8BYC6                                                                             | Serine/threonine-protein kinase TAO3 (EC 2.7.11.1) (Thousand and one amino acid protein 3)                                                                                          | Taok3          | 32  | 38   | 9  | 16  |
|                                    | P62962                                                                             | Profilin-1 (Profilin I)                                                                                                                                                             | Pfn1           | 30  | 93   | 4  | 7   |
|                                    | P18760                                                                             | Cofilin-1 (Cofilin, non-muscle isoform)                                                                                                                                             | Cfl1           | 959 | 2552 | 70 | 122 |
|                                    | P17742                                                                             | Peptidyl-prolyl cis-trans isomerase A (PPIase A) (Rotamase A) (EC 5.2.1.8) (Cyclophilin A) (Cyclosporin A-binding protein) (SP18)                                                   | Ppia           | 855 | 1549 | 38 | 66  |
|                                    | Q9Z1R2                                                                             | Large proline-rich protein BAT3 (HLA-B-associated transcript 3)                                                                                                                     | Bat3           | 80  | 49   | 15 | 26  |
|                                    | Q9R117                                                                             | Non-receptor tyrosine-protein kinase TYK2 (EC 2.7.10.2)                                                                                                                             | Tyk2           | 27  | 30   | 15 | 26  |
|                                    | Q9D009                                                                             | Putative octanoyltransferase, mitochondrial (EC 2.3.1.181) (Octanoyl-[acyl-carrier-protein]-protein N-octanoyltransferase) (Lipoyl/octanoyl transferase) (Lipoate-protein ligase B) |                | 38  | 42   | 11 | 19  |
|                                    | Q9ERK4                                                                             | Exportin-2 (Exp2) (Importin-alpha re-exporter) (Chromosome segregation 1-like protein)                                                                                              | Cse1l (Xpo2)   | 42  | 153  | 26 | 44  |
|                                    | P57776                                                                             | Elongation factor 1-delta (EF-1-delta)                                                                                                                                              | Eef1d          | 109 | 35   | 3  | 5   |
|                                    | P35980                                                                             | 60S ribosomal protein L18                                                                                                                                                           | Rpl18          | 32  | 22   | 51 | 85  |
| Q8BHG1                             | Nardilysin (EC 3.4.24.61) (N-arginine dibasic convertase) (NRD convertase) (NRD-C) | Nrd1                                                                                                                                                                                | 53             | 54  | 13   | 21 |     |

|        |                                                                                                                                                                    |                     |     |     |    |    |
|--------|--------------------------------------------------------------------------------------------------------------------------------------------------------------------|---------------------|-----|-----|----|----|
| Q6ZWX6 | Eukaryotic translation initiation factor 2 subunit 1 (Eukaryotic translation initiation factor 2 subunit alpha) (eIF-2-alpha) (EIF-2alpha) (EIF-2A)                | Eif2s1 (Eif2a)      | 27  | 177 | 7  | 11 |
| P63001 | Ras-related C3 botulinum toxin substrate 1 (p21-Rac1)                                                                                                              | Rac1                | 31  | 99  | 7  | 11 |
| P62082 | 40S ribosomal protein S7                                                                                                                                           | Rps7                | 104 | 126 | 9  | 14 |
| Q9Z1S0 | Mitotic checkpoint serine/threonine-protein kinase BUB1 beta (EC 2.7.11.1) (MAD3/BUB1-related protein kinase) (Mitotic checkpoint kinase MAD3L)                    | Bub1b (Mad3l)       | 20  | 41  | 15 | 23 |
| O55142 | 60S ribosomal protein L35a                                                                                                                                         | Rpl35a              | 24  | 50  | 4  | 6  |
| P83741 | Serine/threonine-protein kinase WNK1 (EC 2.7.11.1) (Protein kinase with no lysine 1) (Protein kinase, lysine-deficient 1)                                          | Wnk1 (Prkwnk1)      | 56  | 36  | 18 | 27 |
| P97868 | Retinoblastoma-binding protein 6 (p53-associated cellular protein of testis) (Proliferation potential-related protein) (Protein P2P-R)                             | Rbbp6 (P2pr) (Pact) | 21  | 29  | 24 | 35 |
| P99026 | Proteasome subunit beta type-4 (Proteasome beta chain) (EC 3.4.25.1) (Macropain beta chain) (Multicatalytic endopeptidase complex beta chain) (Proteasome chain 3) | Psmb4 (Lmp3)        | 93  | 289 | 11 | 16 |
| Q9QZ39 | Alpha-N-acetylgalactosaminide alpha-2,6-sialyltransferase 1 (EC 2.4.99.3) (GalNAc alpha-2,6-sialyltransferase I) (ST6GalNAc I) (Sialyltransferase 7A)              | St6galnac1 (Siat7a) | 27  | 18  | 11 | 16 |
| P35761 | Dual specificity protein kinase TTK (ESK) (PYT) (EC 2.7.12.1)                                                                                                      | Ttk (Esk)           | 14  | 34  | 9  | 13 |
| O70251 | Elongation factor 1-beta (EF-1-beta)                                                                                                                               | Eef1b (Eef1b2)      | 39  | 102 | 7  | 10 |
| Q00342 | FL cytokine receptor (EC 2.7.10.1) (Tyrosine-protein kinase receptor flk-2) (Fetal liver kinase 2) (Tyrosine-protein kinase FLT3) (CD antigen CD135)               | Flt3 (Flk-2) (Flt3) | 17  | 34  | 7  | 10 |

|        |                                                                                                                                                                                                                                                                                        |                                |      |      |    |    |
|--------|----------------------------------------------------------------------------------------------------------------------------------------------------------------------------------------------------------------------------------------------------------------------------------------|--------------------------------|------|------|----|----|
| Q9Z1F9 | SUMO-activating enzyme subunit 2 (EC 6.3.2.-) (Ubiquitin-like 1-activating enzyme E1B) (Anthracycline-associated resistance ARX)                                                                                                                                                       | Uba2 (Sae2) (Uble1b)           | 62   | 77   | 10 | 14 |
| P05214 | Tubulin alpha-3 chain (Tubulin alpha-3/alpha-7 chain) (Alpha-tubulin 3/7) (Alpha-tubulin isotype M-alpha-3/7)                                                                                                                                                                          | Tuba3a (Tuba3); Tuba3b (Tuba7) | 1112 | 1288 | 61 | 84 |
| P17047 | Lysosome-associated membrane glycoprotein 2 (LAMP-2) (Lysosomal membrane glycoprotein type B) (LGP-B) (CD107 antigen-like family member B) (CD antigen CD107b)                                                                                                                         | Lamp2 (Lamp-2)                 | 26   | 29   | 8  | 11 |
| Q9EPL8 | Importin-7 (Imp7) (Ran-binding protein 7) (RanBP7)                                                                                                                                                                                                                                     | Ipo7 (Ranbp7)                  | 25   | 121  | 9  | 12 |
| Q9WTX2 | Interferon-inducible double stranded RNA-dependent protein kinase activator A (Protein kinase, interferon-inducible double stranded RNA-dependent activator) (Protein activator of the interferon-induced protein kinase) (PKR-associated protein X) (PKR-associating protein X) (RAX) | Prkra (Rax)                    | 28   | 39   | 9  | 12 |
| Q9ERU9 | E3 SUMO-protein ligase RanBP2 (Ran-binding protein 2)                                                                                                                                                                                                                                  | Ranbp2                         | 56   | 49   | 40 | 53 |
| P70168 | Importin subunit beta-1 (Karyopherin subunit beta-1) (Nuclear factor P97) (Pore targeting complex 97 kDa subunit) (PTAC97) (SCG)                                                                                                                                                       | Kpnb1 (Impnb)                  | 48   | 17   | 13 | 17 |
| Q61846 | Maternal embryonic leucine zipper kinase (EC 2.7.11.1) (Protein kinase PK38) (mPK38)                                                                                                                                                                                                   | Melk (Kiaa0175) (Pk38)         | 28   | 32   | 10 | 13 |
| P47753 | F-actin-capping protein subunit alpha-1 (CapZ alpha-1)                                                                                                                                                                                                                                 | Capza1 (Cappa1)                | 60   | 33   | 7  | 9  |

|        |                                                                                                                                                                          |                       |     |     |     |     |
|--------|--------------------------------------------------------------------------------------------------------------------------------------------------------------------------|-----------------------|-----|-----|-----|-----|
| P28271 | Cytoplasmic aconitate hydratase (Aconitase) (EC 4.2.1.3) (Citrate hydro-lyase) (Iron-responsive element-binding protein 1) (IRE-BP 1) (Iron regulatory protein 1) (IRP1) | Aco1 (Ireb1) (Irebp)  | 77  | 122 | 147 | 184 |
| Q60716 | Prolyl 4-hydroxylase subunit alpha-2 (EC 1.14.11.2) (4-PH alpha-2) (Procollagen-proline,2-oxoglutarate-4-dioxygenase subunit alpha-2)                                    | P4ha2                 | 22  | 27  | 8   | 10  |
| Q811J3 | Iron-responsive element-binding protein 2 (IRE-BP 2) (Iron regulatory protein 2) (IRP2)                                                                                  | Ireb2 (Irp2)          | 69  | 119 | 142 | 176 |
| Q61316 | Heat shock 70 kDa protein 4 (Heat shock 70-related protein APG-2)                                                                                                        | Hspa4 (Apg2) (Hsp110) | 379 | 792 | 42  | 52  |
| Q8BU30 | Isoleucyl-tRNA synthetase, cytoplasmic (EC 6.1.1.5) (Isoleucine--tRNA ligase) (IleRS) (IRS)                                                                              | Iars                  | 85  | 46  | 30  | 37  |
| Q8BGD9 | Eukaryotic translation initiation factor 4B (eIF-4B)                                                                                                                     | Eif4b                 | 238 | 306 | 13  | 16  |
| Q9R1P0 | Proteasome subunit alpha type-4 (EC 3.4.25.1) (Proteasome component C9) (Macropain subunit C9) (Multicatalytic endopeptidase complex subunit C9) (Proteasome subunit L)  | Psma4                 | 29  | 151 | 14  | 17  |
| Q9CZY3 | Ubiquitin-conjugating enzyme E2 variant 1 (UEV-1) (CROC-1)                                                                                                               | Ube2v1 (Croc1)        | 83  | 163 | 166 | 201 |
| O08648 | Mitogen-activated protein kinase kinase kinase 4 (EC 2.7.11.25) (MAPK/ERK kinase kinase 4) (MEK kinase 4) (MEKK 4)                                                       | Map3k4 (Mekk4)        | 37  | 16  | 19  | 23  |
| P49025 | Citron Rho-interacting kinase (CRIK) (EC 2.7.11.1) (Rho-interacting, serine/threonine-protein kinase 21)                                                                 | Cit                   | 49  | 67  | 67  | 81  |
| P47754 | F-actin-capping protein subunit alpha-2 (CapZ alpha-2)                                                                                                                   | Capza2 (Cappa2)       | 60  | 33  | 5   | 6   |

|        |                                                                                                                                                                                                                       |                            |     |     |     |     |
|--------|-----------------------------------------------------------------------------------------------------------------------------------------------------------------------------------------------------------------------|----------------------------|-----|-----|-----|-----|
| P54227 | Stathmin (Phosphoprotein p19) (pp19) (Leukemia-associated phosphoprotein p18) (Oncoprotein 18) (Op18) (pp17) (Prosolin) (Metablastin) (Protein Pr22) (Leukemia-associated gene protein)                               | Stmn1 (Lag) (Lap18) (Pr22) | 121 | 120 | 10  | 12  |
| Q8BFY9 | Transportin-1 (Importin beta-2) (Karyopherin beta-2)                                                                                                                                                                  | Tnp1 (Kpnb2)               | 54  | 43  | 10  | 12  |
| Q9QUR6 | Prolyl endopeptidase (PE) (EC 3.4.21.26) (Post-proline cleaving enzyme)                                                                                                                                               | Prep (Pep)                 | 56  | 20  | 15  | 18  |
| P80315 | T-complex protein 1 subunit delta (TCP-1-delta) (CCT-delta) (A45)                                                                                                                                                     | Cct4 (Cctd)                | 61  | 59  | 15  | 18  |
| O08810 | 116 kDa U5 small nuclear ribonucleoprotein component (U5 snRNP-specific protein, 116 kDa) (U5-116 kDa) (Elongation factor Tu GTP-binding domain-containing protein 2)                                                 | Eftud2 (Snrp116)           | 80  | 68  | 21  | 25  |
| P80313 | T-complex protein 1 subunit eta (TCP-1-eta) (CCT-eta)                                                                                                                                                                 | Cct7 (Ccth)                | 49  | 50  | 11  | 13  |
| Q8C3X4 | GTP-binding protein GUF1 homolog                                                                                                                                                                                      | Guf1                       | 311 | 506 | 412 | 483 |
| Q62418 | Drebrin-like protein (SH3 domain-containing protein 7) (Actin-binding protein 1)                                                                                                                                      | Dbn1 (Abp1) (Sh3p7)        | 24  | 39  | 7   | 8   |
| Q6A4J8 | Ubiquitin carboxyl-terminal hydrolase 7 (EC 3.1.2.15) (Ubiquitin thioesterase 7) (Ubiquitin-specific-processing protease 7) (Deubiquitinating enzyme 7) (Herpesvirus-associated ubiquitin-specific protease) (mHAUSP) | Usp7 (Hausp)               | 27  | 18  | 14  | 16  |
| P97820 | Mitogen-activated protein kinase kinase kinase kinase 4 (EC 2.7.11.1) (MAPK/ERK kinase kinase kinase 4) (MEK kinase kinase 4) (MEKKK 4) (HPK/GCK-like kinase HGK) (Nck-interacting kinase)                            | Map4k4 (Nik)               | 65  | 54  | 15  | 17  |
| P62270 | 40S ribosomal protein S18 (Ke-3) (Ke3)                                                                                                                                                                                | Rps18                      | 210 | 209 | 15  | 17  |
| P55200 | Histone-lysine N-methyltransferase HRX (EC 2.1.1.43) (Zinc finger protein HRX) (ALL-1)                                                                                                                                | Mll (All1) (Hrx) (Mll1)    | 67  | 26  | 39  | 44  |

|        |                                                                                                                                                                                                    |                                    |      |      |     |     |
|--------|----------------------------------------------------------------------------------------------------------------------------------------------------------------------------------------------------|------------------------------------|------|------|-----|-----|
| P62908 | 40S ribosomal protein S3                                                                                                                                                                           | Rps3                               | 778  | 762  | 39  | 44  |
| P26618 | Alpha-type platelet-derived growth factor receptor (EC 2.7.10.1) (PDGF-R-alpha) (CD140 antigen-like family member A) (CD antigen CD140a)                                                           | Pdgfra                             | 37   | 73   | 160 | 178 |
| P19253 | 60S ribosomal protein L13a (Transplantation antigen P198) (Tum-P198 antigen)                                                                                                                       | Rpl13a (P198) (Tstap198-7)         | 27   | 65   | 9   | 10  |
| P62631 | Elongation factor 1-alpha 2 (EF-1-alpha-2) (Elongation factor 1 A-2) (eEF1A-2) (Statin S1)                                                                                                         | Eef1a2 (Eef1a1) (Stn)              | 1275 | 1549 | 258 | 285 |
| Q62446 | FK506-binding protein 3 (EC 5.2.1.8) (Peptidyl-prolyl cis-trans isomerase) (PPIase) (Rotamase) (25 kDa FKBP) (FKBP-25) (Rapamycin-selective 25 kDa immunophilin)                                   | Fkbp3 (Fkbp25)                     | 31   | 31   | 10  | 11  |
| O55234 | Proteasome subunit beta type-5 (EC 3.4.25.1) (Proteasome epsilon chain) (Macropain epsilon chain) (Multicatalytic endopeptidase complex epsilon chain) (Proteasome subunit X) (Proteasome chain 6) | Psmb5                              | 168  | 227  | 10  | 11  |
| Q9D8N0 | Elongation factor 1-gamma (EF-1-gamma) (eEF-1B gamma)                                                                                                                                              | Eef1g                              | 31   | 85   | 11  | 12  |
| Q99KK9 | Probable histidyl-tRNA synthetase, mitochondrial (EC 6.1.1.21) (Histidine--tRNA ligase) (HisRS) (Histidine--tRNA ligase-like)                                                                      | Hars2 (Hars1)                      | 20   | 41   | 22  | 24  |
| P27546 | Microtubule-associated protein 4 (MAP-4)                                                                                                                                                           | Map4 (Mtap4)                       | 94   | 41   | 33  | 36  |
| P07901 | Heat shock protein HSP 90-alpha (HSP 86) (Tumor-specific transplantation 86 kDa antigen) (TSTA)                                                                                                    | Hsp90aa1 (Hsp86) (Hsp86-1) (Hspca) | 1529 | 2324 | 134 | 146 |

|        |                                                                                                                                                                                                                                       |                                    |      |      |     |     |
|--------|---------------------------------------------------------------------------------------------------------------------------------------------------------------------------------------------------------------------------------------|------------------------------------|------|------|-----|-----|
| Q6P9Z1 | SWI/SNF-related matrix-associated actin-dependent regulator of chromatin subfamily D member 3 (60 kDa BRG-1/Brm-associated factor subunit C) (BRG1-associated factor 60C) (mBAF60c)                                                   | Smarcd3 (Baf60c)                   | 29   | 19   | 46  | 50  |
| P38647 | Stress-70 protein, mitochondrial (75 kDa glucose-regulated protein) (GRP 75) (Heat shock 70 kDa protein 9) (Peptide-binding protein 74) (PBP74) (P66 MOT) (Mortalin)                                                                  | Hspa9 (Grp75) (Hsp74) (Hspa9a)     | 33   | 33   | 12  | 13  |
| Q8BKC5 | Importin-5 (Imp5) (Importin subunit beta-3) (Karyopherin beta-3) (Ran-binding protein 5) (RanBP5)                                                                                                                                     | Ipo5 (Kpnb3) (Ranbp5)              | 185  | 91   | 12  | 13  |
| P10126 | Elongation factor 1-alpha 1 (EF-1-alpha-1) (Elongation factor 1 A-1) (eEF1A-1) (Elongation factor Tu) (EF-Tu)                                                                                                                         | Eef1a1 (Eef1a)                     | 2004 | 2344 | 305 | 330 |
| P08113 | Endoplasmic (Heat shock protein 90 kDa beta member 1) (94 kDa glucose-regulated protein) (GRP94) (ERP99) (Polymorphic tumor rejection antigen 1) (Tumor rejection antigen gp96)                                                       | Hsp90b1 (Tra1) (Tra1)              | 221  | 298  | 25  | 27  |
| Q9Z104 | SWI/SNF-related matrix-associated actin-dependent regulator of chromatin subfamily E member 1-related (SMARCE1-related protein) (HMG box-containing protein 20B) (Structural DNA-binding protein BRAF35) (BRCA2-associated factor 35) | Hmg20b (Braf35) (Hmgx2) (Smarce1r) | 30   | 20   | 14  | 15  |
| P11984 | T-complex protein 1 subunit alpha A (TCP-1-alpha) (CCT-alpha) (Tailless complex polypeptide 1A) (TCP-1-A)                                                                                                                             | Cct1 (Ccta) (Tc1)                  | 29   | 66   | 14  | 15  |



|        |                                                                                                                                                                                                                                                                                                                                        |                        |     |     |     |     |
|--------|----------------------------------------------------------------------------------------------------------------------------------------------------------------------------------------------------------------------------------------------------------------------------------------------------------------------------------------|------------------------|-----|-----|-----|-----|
| P70398 | Probable ubiquitin carboxyl-terminal hydrolase FAF-X (EC 3.1.2.15) (Ubiquitin thioesterase FAF-X) (Ubiquitin-specific-processing protease FAF-X) (Deubiquitinating enzyme FAF-X) (Fat facets protein-related, X-linked) (Ubiquitin-specific protease 9, X chromosome) (Ubiquitin carboxyl-terminal hydrolase FAM) (Fat facets homolog) | Usp9x (Faf1) (Fam)     | 42  | 28  | 57  | 61  |
| Q8BKX6 | Serine/threonine-protein kinase SMG1 (SMG-1) (EC 2.7.11.1)                                                                                                                                                                                                                                                                             | Smg1 (Kiaa0421)        | 33  | 27  | 30  | 32  |
| Q8VI56 | Low-density lipoprotein receptor-related protein 4 (LDLR dan)                                                                                                                                                                                                                                                                          | Lrp4 (Kiaa0816)        | 77  | 30  | 19  | 20  |
| P16546 | Spectrin alpha chain, brain (Spectrin, non-erythroid alpha chain) (Alpha-II spectrin) (Fodrin alpha chain)                                                                                                                                                                                                                             | Sptan1 (Spna2) (Spta2) | 68  | 86  | 66  | 69  |
| Q920R0 | Als1n (Amyotrophic lateral sclerosis protein 2 homolog)                                                                                                                                                                                                                                                                                | Als2                   | 74  | 88  | 72  | 75  |
| P62281 | 40S ribosomal protein S11                                                                                                                                                                                                                                                                                                              | Rps11                  | 166 | 132 | 27  | 28  |
| Q9JM05 | E3 SUMO-protein ligase PIAS4 (Protein inhibitor of activated STAT protein 4) (Protein inhibitor of activated STAT protein gamma) (PIAS-gamma) (PIASy)                                                                                                                                                                                  | Pias4 (Piasg)          | 26  | 29  | 162 | 165 |
| P62141 | Serine/threonine-protein phosphatase PP1-beta catalytic subunit (PP-1B) (EC 3.1.3.16)                                                                                                                                                                                                                                                  | Ppp1cb                 | 177 | 57  | 4   | 4   |
| P12367 | cAMP-dependent protein kinase type II-alpha regulatory subunit                                                                                                                                                                                                                                                                         | Prkar2a                | 33  | 23  | 5   | 5   |
| Q9R1P1 | Proteasome subunit beta type-3 (EC 3.4.25.1) (Proteasome theta chain) (Proteasome chain 13) (Proteasome component C10-II)                                                                                                                                                                                                              | Psmb3                  | 87  | 135 | 7   | 7   |

|        |                                                                                                                                                                                                        |                                                |      |      |     |     |
|--------|--------------------------------------------------------------------------------------------------------------------------------------------------------------------------------------------------------|------------------------------------------------|------|------|-----|-----|
| P30416 | FK506-binding protein 4 (EC 5.2.1.8) (Peptidyl-prolyl cis-trans isomerase) (PPIase) (Rotamase) (HSP-binding immunophilin) (HBI) (FKBP52 protein) (52 kDa FK506-binding protein) (FKBP59) (p59 protein) | Fkbp4                                          | 40   | 62   | 8   | 8   |
| Q6P5F9 | Exportin-1 (Exp1) (Chromosome region maintenance 1 protein homolog)                                                                                                                                    | Xpo1 (Crm1)                                    | 19   | 43   | 9   | 9   |
| O09061 | Proteasome subunit beta type-1 (EC 3.4.25.1) (Proteasome component C5) (Macropain subunit C5) (Multicatalytic endopeptidase complex subunit C5) (Proteasome gamma chain)                               | Psemb1                                         | 84   | 94   | 11  | 11  |
| Q9DB77 | Cytochrome b-c1 complex subunit 2, mitochondrial (Ubiquinol-cytochrome-c reductase complex core protein 2) (Core protein II) (Complex III subunit 2)                                                   | Uqcrc2                                         | 29   | 20   | 13  | 13  |
| Q8R4K2 | Interleukin-1 receptor-associated kinase 4 (IRAK-4) (EC 2.7.11.1)                                                                                                                                      | Irak4                                          | 32   | 47   | 22  | 22  |
| Q62261 | Spectrin beta chain, brain 1 (Spectrin, non-erythroid beta chain 1) (Beta-II spectrin) (Fodrin beta chain) (Embryonic liver fodrin)                                                                    | Sptbn1 (Elf)<br>(Spnb-2)<br>(Spnb2)<br>(Sptb2) | 56   | 54   | 48  | 48  |
| P11499 | Heat shock protein HSP 90-beta (HSP 84) (Tumor-specific transplantation 84 kDa antigen) (TSTA)                                                                                                         | Hsp90ab1<br>(Hsp84)<br>(Hsp84-1)<br>(Hspcb)    | 2943 | 3523 | 208 | 205 |
| P58252 | Elongation factor 2 (EF-2)                                                                                                                                                                             | Eef2                                           | 1630 | 1718 | 128 | 126 |
| P23116 | Eukaryotic translation initiation factor 3 subunit A (eIF3a) (Eukaryotic translation initiation factor 3 subunit 10) (eIF-3-theta) (eIF3 p167) (eIF3 p180) (eIF3 p185) (p162) (Centrosomin)            | Eif3a (Csma)<br>(Eif3)<br>(Eif3s10)            | 199  | 166  | 58  | 56  |
| P16406 | Glutamyl aminopeptidase (EC 3.4.11.7) (EAP) (Aminopeptidase A) (APA) (BP-1/6C3 antigen) (CD antigen CD249)                                                                                             | Enpep                                          | 98   | 90   | 48  | 46  |

|        |                                                                                                                                                                                                                     |                          |     |     |     |     |
|--------|---------------------------------------------------------------------------------------------------------------------------------------------------------------------------------------------------------------------|--------------------------|-----|-----|-----|-----|
| Q8BGQ7 | Alanyl-tRNA synthetase, cytoplasmic (EC 6.1.1.7) (Alanine--tRNA ligase) (AlaRS)                                                                                                                                     | Aars                     | 179 | 216 | 23  | 22  |
| Q8R1B4 | Eukaryotic translation initiation factor 3 subunit C (eIF3c) (Eukaryotic translation initiation factor 3 subunit 8) (eIF3 p110)                                                                                     | Eif3c (Eif3s8)           | 34  | 63  | 22  | 21  |
| Q9CPR4 | 60S ribosomal protein L17                                                                                                                                                                                           | Rpl17                    | 187 | 135 | 15  | 14  |
| Q7TMY8 | E3 ubiquitin-protein ligase HUWE1 (EC 6.3.2.-) (HECT, UBA and WWE domain-containing protein 1) (Upstream regulatory element-binding protein 1) (URE-binding protein 1) (URE-B1) (E3Histone)                         | Huwe1 (Kiaa0312) (Ureb1) | 33  | 91  | 39  | 36  |
| P35969 | Vascular endothelial growth factor receptor 1 (VEGFR-1) (EC 2.7.10.1) (Tyrosine-protein kinase receptor FLT) (FLT-1) (Embryonic receptor kinase 2)                                                                  | Flt1 (Emrk2) (Flt)       | 29  | 36  | 35  | 32  |
| Q01853 | Transitional endoplasmic reticulum ATPase (TER ATPase) (15S Mg(2+)-ATPase p97 subunit) (Valosin-containing protein) (VCP)                                                                                           | Vcp                      | 691 | 699 | 56  | 51  |
| Q9WTR0 | Matrix metalloproteinase-16 (MMP-16) (EC 3.4.24.-) (Membrane-type matrix metalloproteinase 3) (MT-MMP 3) (MTMMP3) (Membrane-type-3 matrix metalloproteinase) (MT3-MMP) (MT3MMP)                                     | Mmp16                    | 17  | 36  | 11  | 10  |
| Q8CGC7 | Bifunctional aminoacyl-tRNA synthetase [Includes: Glutamyl-tRNA synthetase (EC 6.1.1.17) (Glutamate--tRNA ligase); Prolyl-tRNA synthetase (EC 6.1.1.15) (Proline--tRNA ligase)]                                     | Eprs (Qprs)              | 130 | 102 | 32  | 29  |
| Q8VDD5 | Myosin-9 (Myosin heavy chain 9) (Myosin heavy chain, non-muscle IIa) (Non-muscle myosin heavy chain IIa) (NMMHC II-a) (NMMHC-IIA) (Cellular myosin heavy chain, type A) (Non-muscle myosin heavy chain-A) (NMMHC-A) | Myh9                     | 780 | 839 | 127 | 115 |

|        |                                                                                                                                                                 |                                    |     |      |    |    |
|--------|-----------------------------------------------------------------------------------------------------------------------------------------------------------------|------------------------------------|-----|------|----|----|
| Q9QZH3 | Peptidyl-prolyl cis-trans isomerase E (PPIase E) (Rotamase E) (EC 5.2.1.8) (Cyclophilin E) (Cyclophilin-33)                                                     | Ppie (Cyp33)                       | 28  | 35   | 10 | 9  |
| Q9R0P5 | Destrin (Actin-depolymerizing factor) (ADF) (Sid 23)                                                                                                            | Dstn (Dsn) (Sid23)                 | 61  | 81   | 8  | 7  |
| P70195 | Proteasome subunit beta type-7 (EC 3.4.25.1) (Proteasome subunit Z) (Macropain chain Z) (Multicatalytic endopeptidase complex chain Z)                          | Psmb7 (Mmc14)                      | 39  | 40   | 8  | 7  |
| Q02053 | Ubiquitin-like modifier-activating enzyme 1 (Ubiquitin-activating enzyme E1) (Ubiquitin-like modifier-activating enzyme 1 X) (Ubiquitin-activating enzyme E1 X) | Uba1 (Sbx) (Ube1) (Ube1ax) (Ube1x) | 660 | 1086 | 63 | 55 |
| Q8VHE6 | Dynein heavy chain 5, axonemal (Axonemal beta dynein heavy chain 5) (Mdnah5) (Ciliary dynein heavy chain 5)                                                     | Dnah5 (Dnahc5)                     | 47  | 44   | 83 | 72 |
| Q11011 | Puromycin-sensitive aminopeptidase (PSA) (EC 3.4.11.-)                                                                                                          | Npepps (Psa)                       | 71  | 141  | 30 | 26 |
| Q9Z1Q9 | Valyl-tRNA synthetase (EC 6.1.1.9) (Valine--tRNA ligase) (ValRS) (Protein G7a)                                                                                  | Vars (Bat6) (G7a) (Vars2)          | 380 | 302  | 37 | 32 |
| Q9JKK8 | Serine/threonine-protein kinase ATR (EC 2.7.11.1) (Ataxia telangiectasia and Rad3-related protein)                                                              | Atr                                | 20  | 25   | 72 | 62 |
| Q9D868 | Peptidyl-prolyl cis-trans isomerase H (PPIase H) (Rotamase H) (EC 5.2.1.8)                                                                                      | Ppih                               | 55  | 31   | 7  | 6  |
| P67984 | 60S ribosomal protein L22 (Heparin-binding protein HBp15)                                                                                                       | Rpl22                              | 59  | 48   | 7  | 6  |
| O88866 | Hormonally up-regulated neu tumor-associated kinase (EC 2.7.11.1) (Serine/threonine-protein kinase MAK-V)                                                       | Hunk (Makv)                        | 27  | 21   | 14 | 12 |
| P35979 | 60S ribosomal protein L12                                                                                                                                       | Rpl12                              | 208 | 389  | 14 | 12 |
| P97784 | Cryptochrome-1                                                                                                                                                  | Cry1                               | 52  | 42   | 21 | 18 |
| Q9R194 | Cryptochrome-2                                                                                                                                                  | Cry2 (Kiaa0658)                    | 52  | 42   | 21 | 18 |
| Q9CZM2 | 60S ribosomal protein L15                                                                                                                                       | Rpl15                              | 225 | 107  | 21 | 18 |
| Q6ZWN5 | 40S ribosomal protein S9                                                                                                                                        | Rps9                               | 459 | 248  | 47 | 40 |

|        |                                                                                                                                                                                                                |                             |     |     |    |    |
|--------|----------------------------------------------------------------------------------------------------------------------------------------------------------------------------------------------------------------|-----------------------------|-----|-----|----|----|
| Q9JM52 | Misshapen-like kinase 1 (EC 2.7.11.1)<br>(Mitogen-activated protein kinase kinase kinase 6) (MAPK/ERK kinase kinase 6) (MEK kinase kinase 6) (MEKKK 6) (Misshapen/NIK-related kinase) (GCK family kinase MiNK) | Mink1<br>(Map4k6)<br>(Mink) | 18  | 54  | 13 | 11 |
| Q9CQN1 | Heat shock protein 75 kDa, mitochondrial (HSP 75) (Tumor necrosis factor type 1 receptor-associated protein) (TRAP-1) (TNFR-associated protein 1)                                                              | Trap1 (Hsp75)               | 197 | 335 | 13 | 11 |
| P14131 | 40S ribosomal protein S16                                                                                                                                                                                      | Rps16                       | 160 | 126 | 19 | 16 |
| P20029 | 78 kDa glucose-regulated protein (GRP 78) (Heat shock 70 kDa protein 5) (Immunoglobulin heavy chain-binding protein) (BiP)                                                                                     | Hspa5 (Grp78)               | 262 | 312 | 25 | 21 |
| Q99PP7 | E3 ubiquitin-protein ligase TRIM33 (EC 6.3.2.-) (Tripartite motif-containing protein 33) (Transcription intermediary factor 1-gamma) (TIF1-gamma) (Ectodermin homolog)                                         | Trim33<br>(Kiaa1113)        | 33  | 25  | 12 | 10 |
| P11983 | T-complex protein 1 subunit alpha B (TCP-1-alpha) (CCT-alpha) (Tailless complex polypeptide 1B) (TCP-1-B)                                                                                                      | Cct1 (Ccta)<br>(Tcp1)       | 29  | 66  | 18 | 15 |
| Q64514 | Tripeptidyl-peptidase 2 (EC 3.4.14.10) (Tripeptidyl-peptidase II) (TPP-II) (Tripeptidyl aminopeptidase)                                                                                                        | Tpp2                        | 54  | 76  | 24 | 20 |
| P20357 | Microtubule-associated protein 2 (MAP-2)                                                                                                                                                                       | Map2 (Mtap2)                | 50  | 22  | 30 | 25 |
| P11531 | Dystrophin                                                                                                                                                                                                     | Dmd                         | 25  | 16  | 66 | 55 |
| Q91XQ0 | Dynein heavy chain 8, axonemal (Axonemal beta dynein heavy chain 8) (Ciliary dynein heavy chain 8)                                                                                                             | Dnahc8                      | 47  | 51  | 77 | 64 |
| P80316 | T-complex protein 1 subunit epsilon (TCP-1-epsilon) (CCT-epsilon)                                                                                                                                              | Cct5 (Ccte)<br>(Kiaa0098)   | 239 | 102 | 17 | 14 |
| P14206 | 40S ribosomal protein SA (Laminin receptor 1) (p40) (34/67 kDa laminin receptor) (37 kDa oncofetal antigen) (OFA/iLRP)                                                                                         | Rpsa (Lamr1)<br>(P40-8)     | 131 | 112 | 11 | 9  |

|        |                                                                                                                                                                                        |                                        |     |     |     |     |
|--------|----------------------------------------------------------------------------------------------------------------------------------------------------------------------------------------|----------------------------------------|-----|-----|-----|-----|
| Q6ZQ38 | Cullin-associated NEDD8-dissociated protein 1 (Cullin-associated and neddylation-dissociated protein 1) (p120 CAND1)                                                                   | Cand1 (D10Ert516e) (Kiaa0829)          | 221 | 246 | 33  | 27  |
| Q80ZW0 | Serine/threonine-protein kinase 35 (EC 2.7.11.1)                                                                                                                                       | Stk35                                  | 14  | 50  | 21  | 17  |
| Q64512 | Tyrosine-protein phosphatase non-receptor type 13 (EC 3.1.3.48) (Protein tyrosine phosphatase PTP-BL) (Protein-tyrosine phosphatase RIP) (Protein tyrosine phosphatase DPZPTP) (PTP36) | Ptpn13 (Ptp14)                         | 28  | 27  | 26  | 21  |
| Q62407 | Striated muscle-specific serine/threonine protein kinase (EC 2.7.11.1) (Aortic preferentially expressed protein 1) (APEG-1)                                                            | Speg (Apeg1) (Kiaa1297)                | 26  | 20  | 31  | 25  |
| P54923 | [Protein ADP-ribosylarginine] hydrolase (ADP-ribosylarginine hydrolase) (EC 3.2.2.19) (ADP-ribose-L-arginine cleaving enzyme)                                                          | Adprh (Arh1)                           | 20  | 41  | 15  | 12  |
| Q9Z2U0 | Proteasome subunit alpha type-7 (EC 3.4.25.1) (Proteasome subunit RC6-1)                                                                                                               | Psm7                                   | 121 | 253 | 15  | 12  |
| P12970 | 60S ribosomal protein L7a (Surfeit locus protein 3)                                                                                                                                    | Rpl7a (Surf-3) (Surf3)                 | 111 | 31  | 15  | 12  |
| Q8BP67 | 60S ribosomal protein L24                                                                                                                                                              | Rpl24                                  | 354 | 214 | 24  | 19  |
| Q80ZI6 | E3 ubiquitin-protein ligase LRSAM1 (EC 6.3.2.-) (Leucine-rich repeat and sterile alpha motif-containing protein 1) (Tsg101-associated ligase)                                          | Lrsam1                                 | 19  | 35  | 19  | 15  |
| P62754 | 40S ribosomal protein S6 (Phosphoprotein NP33)                                                                                                                                         | Rps6                                   | 127 | 283 | 19  | 15  |
| Q9QWL7 | Keratin, type I cytoskeletal 17 (Cytokeratin-17) (CK-17) (Keratin-17) (K17)                                                                                                            | Krt17 (Krt1-17)                        | 38  | 46  | 14  | 11  |
| Q9JHU4 | Cytoplasmic dynein 1 heavy chain 1 (Cytoplasmic dynein heavy chain 1) (Dynein heavy chain, cytosolic)                                                                                  | Dync1h1 (Dhc1) (Dnch1) (Dnchc1) (Dyhc) | 822 | 395 | 157 | 123 |

|        |                                                                                                                                                      |                                                   |     |     |    |    |
|--------|------------------------------------------------------------------------------------------------------------------------------------------------------|---------------------------------------------------|-----|-----|----|----|
| P31254 | Ubiquitin-like modifier-activating enzyme 1 Y (Ubiquitin-activating enzyme E1 Y) (Ubiquitin-activating enzyme E1)                                    | Ube1ay (Sby) (Ube1y) (Ube1y1)                     | 161 | 77  | 22 | 17 |
| Q8CGK3 | Lon protease homolog, mitochondrial (EC 3.4.21.-) (Lon protease-like protein) (LONP) (Mitochondrial ATP-dependent protease Lon) (Serine protease 15) | Lonp1 (Prss15)                                    | 21  | 30  | 43 | 33 |
| P62702 | 40S ribosomal protein S4, X isoform                                                                                                                  | Rps4x (Rps4)                                      | 402 | 304 | 30 | 23 |
| Q8JZQ2 | AFG3-like protein 2 (EC 3.4.24.-)                                                                                                                    | Afg3l2                                            | 15  | 27  | 17 | 13 |
| P16627 | Heat shock 70 kDa protein 1L (Heat shock 70 kDa protein 1-like) (Heat shock 70 kDa-like protein 1) (Spermatid-specific heat shock protein 70)        | Hspa1l (Hsc70t)                                   | 319 | 238 | 33 | 25 |
| Q02956 | Protein kinase C zeta type (EC 2.7.11.13) (nPKC-zeta)                                                                                                | Prkcz (PkcZ)                                      | 29  | 15  | 8  | 6  |
| P62751 | 60S ribosomal protein L23a                                                                                                                           | Rpl23a                                            | 75  | 49  | 16 | 12 |
| Q8K045 | Serine/threonine-protein kinase N3 (EC 2.7.11.13) (Protein kinase PKN-beta) (Protein-kinase C-related kinase 3)                                      | Pkn3 (Pknbeta)                                    | 130 | 126 | 36 | 27 |
| P58681 | Toll-like receptor 7                                                                                                                                 | Tlr7                                              | 27  | 33  | 23 | 17 |
| P62264 | 40S ribosomal protein S14                                                                                                                            | Rps14                                             | 163 | 166 | 15 | 11 |
| P25444 | 40S ribosomal protein S2 (S4) (LLRep3 protein)                                                                                                       | Rps2 (Llrep3) (Rps4)                              | 217 | 50  | 26 | 19 |
| P62991 | Ubiquitin                                                                                                                                            | Rps27a (Uba80) (Ubcep1); Uba52 (Ubcep2); Ubb; Ubc | 61  | 54  | 11 | 8  |
| Q61696 | Heat shock 70 kDa protein 1A (Heat shock 70 kDa protein 3) (HSP70.3) (Hsp68)                                                                         | Hspa1a (Hsp70-3) (Hsp70A1)                        | 266 | 236 | 33 | 24 |
| Q9CR57 | 60S ribosomal protein L14                                                                                                                            | Rpl14                                             | 508 | 391 | 33 | 24 |

|        |                                                                                                                                                                                                   |                                    |      |     |    |    |
|--------|---------------------------------------------------------------------------------------------------------------------------------------------------------------------------------------------------|------------------------------------|------|-----|----|----|
| Q61699 | Heat shock protein 105 kDa (Heat shock-related 100 kDa protein E7I) (HSP-E7I) (Heat shock 110 kDa protein) (42 degrees C-HSP)                                                                     | Hsph1 (Hsp105) (Hsp110) (Kiaa0201) | 46   | 48  | 18 | 13 |
| P27659 | 60S ribosomal protein L3 (J1 protein)                                                                                                                                                             | Rpl3                               | 192  | 75  | 25 | 18 |
| Q99LG2 | Transportin-2 (Karyopherin beta-2b)                                                                                                                                                               | Tnpo2                              | 42   | 32  | 7  | 5  |
| Q60673 | Receptor-type tyrosine-protein phosphatase-like N (R-PTP-N) (PTP IA-2)                                                                                                                            | Ptprn (Ptp35)                      | 30   | 18  | 14 | 10 |
| P14148 | 60S ribosomal protein L7                                                                                                                                                                          | Rpl7                               | 145  | 52  | 14 | 10 |
| P14869 | 60S acidic ribosomal protein P0 (L10E)                                                                                                                                                            | Rplp0 (Arbp)                       | 115  | 334 | 28 | 20 |
| Q60692 | Proteasome subunit beta type-6 (EC 3.4.25.1) (Proteasome delta chain) (Macropain delta chain) (Multicatalytic endopeptidase complex delta chain) (Proteasome subunit Y)                           | Psmb6 (Lmp19)                      | 33   | 89  | 17 | 12 |
| P51410 | 60S ribosomal protein L9                                                                                                                                                                          | Rpl9                               | 187  | 212 | 17 | 12 |
| Q8BMJ2 | Leucyl-tRNA synthetase, cytoplasmic (EC 6.1.1.4) (Leucine--tRNA ligase) (LeuRS)                                                                                                                   | Lars                               | 52   | 45  | 47 | 33 |
| Q7TQI3 | Ubiquitin thioesterase OTUB1 (EC 3.1.2.-) (Otubain-1) (OTU domain-containing ubiquitin aldehyde-binding protein 1) (Ubiquitin-specific-processing protease OTUB1) (Deubiquitinating enzyme OTUB1) | Otub1                              | 152  | 109 | 10 | 7  |
| Q91YJ5 | Translation initiation factor IF-2, mitochondrial (IF-2Mt) (IF2(mt)) (IF-2(Mt))                                                                                                                   | Mtif2                              | 29   | 23  | 13 | 9  |
| Q9CWF2 | Tubulin beta-2B chain                                                                                                                                                                             | Tubb2b                             | 1435 | 825 | 86 | 59 |
| P99024 | Tubulin beta-5 chain                                                                                                                                                                              | Tubb5                              | 1377 | 976 | 88 | 60 |
| Q80TP3 | E3 ubiquitin-protein ligase UBR5 (EC 6.3.2.-) (E3 ubiquitin-protein ligase, HECT domain-containing 1) (Hyperplastic discs protein homolog)                                                        | Ubr5 (Edd) (Edd1) (Kiaa0896)       | 27   | 17  | 43 | 29 |
| Q8C9S8 | Cysteine protease ATG4A (EC 3.4.22.-) (Autophagy-related protein 4 homolog A) (Autophagin-2) (Autophagy-related cysteine endopeptidase 2) (AUT-like 2 cysteine endopeptidase)                     | Atg4a (Apg4a) (Autl2)              | 26   | 21  | 6  | 4  |



|        |                                                                                                                                                                                                                               |                           |      |     |    |    |
|--------|-------------------------------------------------------------------------------------------------------------------------------------------------------------------------------------------------------------------------------|---------------------------|------|-----|----|----|
| Q8K4L3 | Supervillin (Archvillin) (p205/p250)                                                                                                                                                                                          | Svil                      | 25   | 22  | 18 | 12 |
| P68372 | Tubulin beta-2C chain                                                                                                                                                                                                         | Tubb2c                    | 1300 | 891 | 78 | 51 |
| P42932 | T-complex protein 1 subunit theta (TCP-1-theta) (CCT-theta)                                                                                                                                                                   | Cct8 (Cctq)               | 197  | 57  | 23 | 15 |
| O70435 | Proteasome subunit alpha type-3 (EC 3.4.25.1) (Proteasome component C8) (Macropain subunit C8) (Multicatalytic endopeptidase complex subunit C8) (Proteasome subunit K)                                                       | Psma3                     | 95   | 76  | 14 | 9  |
| Q9CXW4 | 60S ribosomal protein L11                                                                                                                                                                                                     | Rpl11                     | 72   | 79  | 11 | 7  |
| Q7TMM9 | Tubulin beta-2A chain                                                                                                                                                                                                         | Tubb2a (Tubb2)            | 1422 | 775 | 83 | 52 |
| Q80U87 | Ubiquitin carboxyl-terminal hydrolase 8 (EC 3.1.2.15) (Ubiquitin thioesterase 8) (Ubiquitin-specific-processing protease 8) (Deubiquitinating enzyme 8) (mUBPy)                                                               | Usp8 (Kiaa0055) (UbpY)    | 29   | 23  | 24 | 15 |
| P62717 | 60S ribosomal protein L18a                                                                                                                                                                                                    | Rpl18a                    | 242  | 62  | 21 | 13 |
| P17156 | Heat shock-related 70 kDa protein 2 (Heat shock protein 70.2)                                                                                                                                                                 | Hspa2 (Hcp70.2) (Hsp70-2) | 964  | 544 | 60 | 37 |
| P84099 | 60S ribosomal protein L19                                                                                                                                                                                                     | Rpl19                     | 39   | 47  | 13 | 8  |
| P62301 | 40S ribosomal protein S13                                                                                                                                                                                                     | Rps13                     | 77   | 100 | 23 | 14 |
| Q9D1R9 | 60S ribosomal protein L34                                                                                                                                                                                                     | Rpl34                     | 34   | 32  | 10 | 6  |
| Q9EQZ6 | Rap guanine nucleotide exchange factor 4 (cAMP-regulated guanine nucleotide exchange factor II) (cAMP-GEFII) (Exchange factor directly activated by cAMP 2) (Epac 2) (cAMP-dependent Rap1 guanine-nucleotide exchange factor) | Rapgef4 (Cgef2) (Epac2)   | 47   | 23  | 20 | 12 |
| Q8R4K8 | Pappalysin-1 (EC 3.4.24.79) (Pregnancy-associated plasma protein A) (PAPP-A) (Insulin-like growth factor-dependent IGF-binding protein 4 protease) (IGF-dependent IGFBP-4 protease) (IGFBP-4ase)                              | Pappa                     | 41   | 43  | 25 | 15 |

|        |                                                                                                                                                                          |                             |      |     |     |    |
|--------|--------------------------------------------------------------------------------------------------------------------------------------------------------------------------|-----------------------------|------|-----|-----|----|
| Q6NZJ6 | Eukaryotic translation initiation factor 4 gamma 1 (eIF-4-gamma 1) (eIF-4G 1) (eIF-4G1)                                                                                  | Eif4g1                      | 47   | 113 | 30  | 18 |
| P63038 | 60 kDa heat shock protein, mitochondrial (Heat shock protein 60) (HSP-60) (Hsp60) (60 kDa chaperonin) (Chaperonin 60) (CPN60) (Mitochondrial matrix protein P1) (HSP-65) | Hspd1 (Hsp60)               | 15   | 32  | 22  | 13 |
| P80317 | T-complex protein 1 subunit zeta (TCP-1-zeta) (CCT-zeta) (CCT-zeta-1)                                                                                                    | Cct6a (Cct6) (Cctz) (Cctz1) | 160  | 52  | 22  | 13 |
| P10630 | Eukaryotic initiation factor 4A-II (eIF-4A-II) (eIF4A-II) (EC 3.6.1.-) (ATP-dependent RNA helicase eIF4A-2)                                                              | Eif4a2 (Ddx2b)              | 194  | 78  | 17  | 10 |
| P63017 | Heat shock cognate 71 kDa protein (Heat shock 70 kDa protein 8)                                                                                                          | Hspa8 (Hsc70) (Hsc73)       | 1719 | 959 | 119 | 70 |
| P05532 | Mast/stem cell growth factor receptor (SCFR) (EC 2.7.10.1) (Proto-oncogene tyrosine-protein kinase Kit) (c-kit) (CD antigen CD117)                                       | Kit (SI)                    | 16   | 35  | 12  | 7  |
| P62900 | 60S ribosomal protein L31                                                                                                                                                | Rpl31                       | 124  | 62  | 12  | 7  |
| Q9JI78 | Peptide-N(4)-(N-acetyl-beta-glucosaminyl)asparagine amidase (PNGase) (mPNGase) (EC 3.5.1.52) (Peptide:N-glycanase) (N-glycanase 1)                                       | Ngly1                       | 29   | 32  | 19  | 11 |
| P41105 | 60S ribosomal protein L28                                                                                                                                                | Rpl28                       | 49   | 41  | 19  | 11 |
| Q9CZX8 | 40S ribosomal protein S19                                                                                                                                                | Rps19                       | 206  | 146 | 19  | 11 |
| P47963 | 60S ribosomal protein L13 (A52)                                                                                                                                          | Rpl13                       | 744  | 379 | 47  | 27 |
| P47757 | F-actin-capping protein subunit beta (CapZ beta)                                                                                                                         | Capzb (Cappb1)              | 107  | 68  | 7   | 4  |
| P26043 | Radixin (ESP10)                                                                                                                                                          | Rdx                         | 127  | 106 | 23  | 13 |
| P49722 | Proteasome subunit alpha type-2 (EC 3.4.25.1) (Proteasome component C3) (Macropain subunit C3) (Multicatalytic endopeptidase complex subunit C3)                         | Psm2 (Lmpc3)                | 188  | 103 | 16  | 9  |

|                                          |        |                                                                                                                                          |                                |     |      |    |     |
|------------------------------------------|--------|------------------------------------------------------------------------------------------------------------------------------------------|--------------------------------|-----|------|----|-----|
|                                          | P97461 | 40S ribosomal protein S5                                                                                                                 | Rps5                           | 89  | 33   | 32 | 18  |
|                                          | Q8K2I9 | F-box only protein 18 (EC 3.6.1.-) (F-box DNA helicase 1)                                                                                | Fbxo18 (Fbh1) (Fbx18)          | 30  | 23   | 9  | 5   |
|                                          | P63073 | Eukaryotic translation initiation factor 4E (eIF-4E) (eIF4E) (mRNA cap-binding protein) (eIF-4F 25 kDa subunit)                          | Eif4e                          | 110 | 25   | 9  | 5   |
|                                          | Q9D6F9 | Tubulin beta-4 chain                                                                                                                     | Tubb4                          | 888 | 493  | 58 | 31  |
|                                          | Q61390 | T-complex protein 1 subunit zeta-2 (TCP-1-zeta-2) (CCT-zeta-2) (Cctz-2)                                                                  | Cct6b                          | 55  | 52   | 15 | 8   |
|                                          | P11103 | Poly [ADP-ribose] polymerase 1 (PARP-1) (EC 2.4.2.30) (ADPRT) (NAD(+) ADP-ribosyltransferase 1) (Poly[ADP-ribose] synthetase 1) (msPARP) | Parp1 (Adprp) (Adprt) (Adprt1) | 21  | 26   | 17 | 9   |
|                                          | Q922F4 | Tubulin beta-6 chain                                                                                                                     | Tubb6                          | 583 | 382  | 40 | 21  |
|                                          | P97351 | 40S ribosomal protein S3a                                                                                                                | Rps3a                          | 899 | 392  | 50 | 26  |
|                                          | Q9ERD7 | Tubulin beta-3 chain                                                                                                                     | Tubb3                          | 780 | 383  | 52 | 27  |
|                                          | Q80UE6 | Serine/threonine-protein kinase WNK4 (EC 2.7.11.1) (Protein kinase with no lysine 4) (Protein kinase, lysine-deficient 4)                | Wnk4 (Prkwnk4)                 | 23  | 33   | 29 | 15  |
| cellular macromolecule metabolic process | Q9CXW3 | Calcyclin-binding protein (CacyBP) (Siah-interacting protein)                                                                            | Cacybp (Sip)                   | 57  | 39   | 7  | 13  |
|                                          | Q7TSG3 | F-box only protein 5 (Early mitotic inhibitor 1)                                                                                         | Fbxo5 (Emi1)                   | 15  | 27   | 5  | 9   |
|                                          | Q8BYC6 | Serine/threonine-protein kinase TAO3 (EC 2.7.11.1) (Thousand and one amino acid protein 3)                                               | Taok3                          | 32  | 38   | 9  | 16  |
|                                          | P62962 | Profilin-1 (Profilin I)                                                                                                                  | Pfn1                           | 30  | 93   | 4  | 7   |
|                                          | P18760 | Cofilin-1 (Cofilin, non-muscle isoform)                                                                                                  | Cfl1                           | 959 | 2552 | 70 | 122 |
|                                          | P17742 | Peptidyl-prolyl cis-trans isomerase A (PPIase A) (Rotamase A) (EC 5.2.1.8) (Cyclophilin A) (Cyclosporin A-binding protein) (SP18)        | Ppia                           | 855 | 1549 | 38 | 66  |
|                                          | Q9Z1R2 | Large proline-rich protein BAT3 (HLA-B-associated transcript 3)                                                                          | Bat3                           | 80  | 49   | 15 | 26  |

|        |                                                                                                                                                                                     |                     |     |     |    |    |
|--------|-------------------------------------------------------------------------------------------------------------------------------------------------------------------------------------|---------------------|-----|-----|----|----|
| Q9R117 | Non-receptor tyrosine-protein kinase TYK2 (EC 2.7.10.2)                                                                                                                             | Tyk2                | 27  | 30  | 15 | 26 |
| Q9D009 | Putative octanoyltransferase, mitochondrial (EC 2.3.1.181) (Octanoyl-[acyl-carrier-protein]-protein N-octanoyltransferase) (Lipoyl/octanoyl transferase) (Lipoate-protein ligase B) |                     | 38  | 42  | 11 | 19 |
| Q9ERK4 | Exportin-2 (Exp2) (Importin-alpha re-exporter) (Chromosome segregation 1-like protein)                                                                                              | Cse1l (Xpo2)        | 42  | 153 | 26 | 44 |
| P57776 | Elongation factor 1-delta (EF-1-delta)                                                                                                                                              | Eef1d               | 109 | 35  | 3  | 5  |
| P35980 | 60S ribosomal protein L18                                                                                                                                                           | Rpl18               | 32  | 22  | 51 | 85 |
| Q8BHG1 | Nardilysin (EC 3.4.24.61) (N-arginine dibasic convertase) (NRD convertase) (NRD-C)                                                                                                  | Nrd1                | 53  | 54  | 13 | 21 |
| Q6ZWX6 | Eukaryotic translation initiation factor 2 subunit 1 (Eukaryotic translation initiation factor 2 subunit alpha) (eIF-2-alpha) (EIF-2alpha) (EIF-2A)                                 | Eif2s1 (Eif2a)      | 27  | 177 | 7  | 11 |
| P63001 | Ras-related C3 botulinum toxin substrate 1 (p21-Rac1)                                                                                                                               | Rac1                | 31  | 99  | 7  | 11 |
| P62082 | 40S ribosomal protein S7                                                                                                                                                            | Rps7                | 104 | 126 | 9  | 14 |
| Q9Z1S0 | Mitotic checkpoint serine/threonine-protein kinase BUB1 beta (EC 2.7.11.1) (MAD3/BUB1-related protein kinase) (Mitotic checkpoint kinase MAD3L)                                     | Bub1b (Mad3l)       | 20  | 41  | 15 | 23 |
| O55142 | 60S ribosomal protein L35a                                                                                                                                                          | Rpl35a              | 24  | 50  | 4  | 6  |
| P83741 | Serine/threonine-protein kinase WNK1 (EC 2.7.11.1) (Protein kinase with no lysine 1) (Protein kinase, lysine-deficient 1)                                                           | Wnk1 (Prkwnk1)      | 56  | 36  | 18 | 27 |
| P97868 | Retinoblastoma-binding protein 6 (p53-associated cellular protein of testis) (Proliferation potential-related protein) (Protein P2P-R)                                              | Rbbp6 (P2pr) (Pact) | 21  | 29  | 24 | 35 |

|        |                                                                                                                                                                    |                                |      |      |    |    |
|--------|--------------------------------------------------------------------------------------------------------------------------------------------------------------------|--------------------------------|------|------|----|----|
| P99026 | Proteasome subunit beta type-4 (Proteasome beta chain) (EC 3.4.25.1) (Macropain beta chain) (Multicatalytic endopeptidase complex beta chain) (Proteasome chain 3) | Psmb4 (Lmp3)                   | 93   | 289  | 11 | 16 |
| Q9QZ39 | Alpha-N-acetylgalactosaminide alpha-2,6-sialyltransferase 1 (EC 2.4.99.3) (GalNAc alpha-2,6-sialyltransferase I) (ST6GalNAc I) (Sialyltransferase 7A)              | St6galnac1 (Siat7a)            | 27   | 18   | 11 | 16 |
| P35761 | Dual specificity protein kinase TTK (ESK) (PYT) (EC 2.7.12.1)                                                                                                      | Ttk (Esk)                      | 14   | 34   | 9  | 13 |
| O70251 | Elongation factor 1-beta (EF-1-beta)                                                                                                                               | Eef1b (Eef1b2)                 | 39   | 102  | 7  | 10 |
| Q00342 | FL cytokine receptor (EC 2.7.10.1) (Tyrosine-protein kinase receptor flk-2) (Fetal liver kinase 2) (Tyrosine-protein kinase FLT3) (CD antigen CD135)               | Flt3 (Flk-2) (Flt3)            | 17   | 34   | 7  | 10 |
| Q9Z1F9 | SUMO-activating enzyme subunit 2 (EC 6.3.2.-) (Ubiquitin-like 1-activating enzyme E1B) (Anthracycline-associated resistance ARX)                                   | Uba2 (Sae2) (Uble1b)           | 62   | 77   | 10 | 14 |
| P05214 | Tubulin alpha-3 chain (Tubulin alpha-3/alpha-7 chain) (Alpha-tubulin 3/7) (Alpha-tubulin isotype M-alpha-3/7)                                                      | Tuba3a (Tuba3); Tuba3b (Tuba7) | 1112 | 1288 | 61 | 84 |
| P17047 | Lysosome-associated membrane glycoprotein 2 (LAMP-2) (Lysosomal membrane glycoprotein type B) (LGP-B) (CD107 antigen-like family member B) (CD antigen CD107b)     | Lamp2 (Lamp-2)                 | 26   | 29   | 8  | 11 |
| Q9EPL8 | Importin-7 (Imp7) (Ran-binding protein 7) (RanBP7)                                                                                                                 | Ipo7 (Ranbp7)                  | 25   | 121  | 9  | 12 |

|        |                                                                                                                                                                                                                                                                                        |                        |     |     |     |     |
|--------|----------------------------------------------------------------------------------------------------------------------------------------------------------------------------------------------------------------------------------------------------------------------------------------|------------------------|-----|-----|-----|-----|
| Q9WTX2 | Interferon-inducible double stranded RNA-dependent protein kinase activator A (Protein kinase, interferon-inducible double stranded RNA-dependent activator) (Protein activator of the interferon-induced protein kinase) (PKR-associated protein X) (PKR-associating protein X) (RAX) | Prkra (Rax)            | 28  | 39  | 9   | 12  |
| Q9ERU9 | E3 SUMO-protein ligase RanBP2 (Ran-binding protein 2)                                                                                                                                                                                                                                  | Ranbp2                 | 56  | 49  | 40  | 53  |
| P70168 | Importin subunit beta-1 (Karyopherin subunit beta-1) (Nuclear factor P97) (Pore targeting complex 97 kDa subunit) (PTAC97) (SCG)                                                                                                                                                       | Kpnb1 (Impnb)          | 48  | 17  | 13  | 17  |
| Q61846 | Maternal embryonic leucine zipper kinase (EC 2.7.11.1) (Protein kinase PK38) (mPK38)                                                                                                                                                                                                   | Melk (Kiaa0175) (Pk38) | 28  | 32  | 10  | 13  |
| P47753 | F-actin-capping protein subunit alpha-1 (CapZ alpha-1)                                                                                                                                                                                                                                 | Capza1 (Cappa1)        | 60  | 33  | 7   | 9   |
| P28271 | Cytoplasmic aconitate hydratase (Aconitase) (EC 4.2.1.3) (Citrate hydro-lyase) (Iron-responsive element-binding protein 1) (IRE-BP 1) (Iron regulatory protein 1) (IRP1)                                                                                                               | Aco1 (Ireb1) (Irebp)   | 77  | 122 | 147 | 184 |
| Q60716 | Prolyl 4-hydroxylase subunit alpha-2 (EC 1.14.11.2) (4-PH alpha-2) (Procollagen-proline,2-oxoglutarate-4-dioxygenase subunit alpha-2)                                                                                                                                                  | P4ha2                  | 22  | 27  | 8   | 10  |
| Q811J3 | Iron-responsive element-binding protein 2 (IRE-BP 2) (Iron regulatory protein 2) (IRP2)                                                                                                                                                                                                | Ireb2 (Irp2)           | 69  | 119 | 142 | 176 |
| Q61316 | Heat shock 70 kDa protein 4 (Heat shock 70-related protein APG-2)                                                                                                                                                                                                                      | Hspa4 (Apg2) (Hsp110)  | 379 | 792 | 42  | 52  |
| Q8BU30 | Isoleucyl-tRNA synthetase, cytoplasmic (EC 6.1.1.5) (Isoleucine--tRNA ligase) (IleRS) (IRS)                                                                                                                                                                                            | Iars                   | 85  | 46  | 30  | 37  |
| Q8BGD9 | Eukaryotic translation initiation factor 4B (eIF-4B)                                                                                                                                                                                                                                   | Eif4b                  | 238 | 306 | 13  | 16  |

|        |                                                                                                                                                                                         |                            |     |     |     |     |
|--------|-----------------------------------------------------------------------------------------------------------------------------------------------------------------------------------------|----------------------------|-----|-----|-----|-----|
| Q9R1P0 | Proteasome subunit alpha type-4 (EC 3.4.25.1) (Proteasome component C9) (Macropain subunit C9) (Multicatalytic endopeptidase complex subunit C9) (Proteasome subunit L)                 | Psma4                      | 29  | 151 | 14  | 17  |
| Q9CZY3 | Ubiquitin-conjugating enzyme E2 variant 1 (UEV-1) (CROC-1)                                                                                                                              | Ube2v1 (Croc1)             | 83  | 163 | 166 | 201 |
| O08648 | Mitogen-activated protein kinase kinase kinase 4 (EC 2.7.11.25) (MAPK/ERK kinase kinase 4) (MEK kinase 4) (MEKK 4)                                                                      | Map3k4 (Mekk4)             | 37  | 16  | 19  | 23  |
| P49025 | Citron Rho-interacting kinase (CRIK) (EC 2.7.11.1) (Rho-interacting, serine/threonine-protein kinase 21)                                                                                | Cit                        | 49  | 67  | 67  | 81  |
| P47754 | F-actin-capping protein subunit alpha-2 (CapZ alpha-2)                                                                                                                                  | Capza2 (Cappa2)            | 60  | 33  | 5   | 6   |
| P54227 | Stathmin (Phosphoprotein p19) (pp19) (Leukemia-associated phosphoprotein p18) (Oncoprotein 18) (Op18) (pp17) (Prosolin) (Metablastin) (Protein Pr22) (Leukemia-associated gene protein) | Stmn1 (Lag) (Lap18) (Pr22) | 121 | 120 | 10  | 12  |
| Q8BFY9 | Transportin-1 (Importin beta-2) (Karyopherin beta-2)                                                                                                                                    | Tnp1 (Kpnb2)               | 54  | 43  | 10  | 12  |
| Q9QUR6 | Prolyl endopeptidase (PE) (EC 3.4.21.26) (Post-proline cleaving enzyme)                                                                                                                 | Prep (Pep)                 | 56  | 20  | 15  | 18  |
| P80315 | T-complex protein 1 subunit delta (TCP-1-delta) (CCT-delta) (A45)                                                                                                                       | Cct4 (Cctd)                | 61  | 59  | 15  | 18  |
| O08810 | 116 kDa U5 small nuclear ribonucleoprotein component (U5 snRNP-specific protein, 116 kDa) (U5-116 kDa) (Elongation factor Tu GTP-binding domain-containing protein 2)                   | Eftud2 (Snrp116)           | 80  | 68  | 21  | 25  |
| P80313 | T-complex protein 1 subunit eta (TCP-1-eta) (CCT-eta)                                                                                                                                   | Cct7 (Ccth)                | 49  | 50  | 11  | 13  |
| Q8C3X4 | GTP-binding protein GUF1 homolog                                                                                                                                                        | Guf1                       | 311 | 506 | 412 | 483 |
| Q62418 | Drebrin-like protein (SH3 domain-containing protein 7) (Actin-binding protein 1)                                                                                                        | Dbnl (Abp1) (Sh3p7)        | 24  | 39  | 7   | 8   |

|        |                                                                                                                                                                                                                       |                            |      |      |     |     |
|--------|-----------------------------------------------------------------------------------------------------------------------------------------------------------------------------------------------------------------------|----------------------------|------|------|-----|-----|
| Q6A4J8 | Ubiquitin carboxyl-terminal hydrolase 7 (EC 3.1.2.15) (Ubiquitin thioesterase 7) (Ubiquitin-specific-processing protease 7) (Deubiquitinating enzyme 7) (Herpesvirus-associated ubiquitin-specific protease) (mHAUSP) | Usp7 (Hausp)               | 27   | 18   | 14  | 16  |
| P97820 | Mitogen-activated protein kinase kinase kinase 4 (EC 2.7.11.1) (MAPK/ERK kinase kinase 4) (MEK kinase kinase 4) (MEKKK 4) (HPK/GCK-like kinase HGK) (Nck-interacting kinase)                                          | Map4k4 (Nik)               | 65   | 54   | 15  | 17  |
| P62270 | 40S ribosomal protein S18 (Ke-3) (Ke3)                                                                                                                                                                                | Rps18                      | 210  | 209  | 15  | 17  |
| P55200 | Histone-lysine N-methyltransferase HRX (EC 2.1.1.43) (Zinc finger protein HRX) (ALL-1)                                                                                                                                | Mll (All1) (Hrx) (Mll1)    | 67   | 26   | 39  | 44  |
| P62908 | 40S ribosomal protein S3                                                                                                                                                                                              | Rps3                       | 778  | 762  | 39  | 44  |
| P26618 | Alpha-type platelet-derived growth factor receptor (EC 2.7.10.1) (PDGF-R-alpha) (CD140 antigen-like family member A) (CD antigen CD140a)                                                                              | Pdgfra                     | 37   | 73   | 160 | 178 |
| P19253 | 60S ribosomal protein L13a (Transplantation antigen P198) (Tum-P198 antigen)                                                                                                                                          | Rpl13a (P198) (Tstap198-7) | 27   | 65   | 9   | 10  |
| P62631 | Elongation factor 1-alpha 2 (EF-1-alpha-2) (Elongation factor 1 A-2) (eEF1A-2) (Statin S1)                                                                                                                            | Eef1a2 (Eef1a1) (Stn)      | 1275 | 1549 | 258 | 285 |
| Q62446 | FK506-binding protein 3 (EC 5.2.1.8) (Peptidyl-prolyl cis-trans isomerase) (PPIase) (Rotamase) (25 kDa FKBP) (FKBP-25) (Rapamycin-selective 25 kDa immunophilin)                                                      | Fkbp3 (Fkbp25)             | 31   | 31   | 10  | 11  |



|        |                                                                                                                                                                                                    |                                    |      |      |     |     |
|--------|----------------------------------------------------------------------------------------------------------------------------------------------------------------------------------------------------|------------------------------------|------|------|-----|-----|
| O55234 | Proteasome subunit beta type-5 (EC 3.4.25.1) (Proteasome epsilon chain) (Macropain epsilon chain) (Multicatalytic endopeptidase complex epsilon chain) (Proteasome subunit X) (Proteasome chain 6) | Psmb5                              | 168  | 227  | 10  | 11  |
| Q9D8N0 | Elongation factor 1-gamma (EF-1-gamma) (eEF-1B gamma)                                                                                                                                              | Eef1g                              | 31   | 85   | 11  | 12  |
| Q99KK9 | Probable histidyl-tRNA synthetase, mitochondrial (EC 6.1.1.21) (Histidine--tRNA ligase) (HisRS) (Histidine--tRNA ligase-like)                                                                      | Hars2 (Harsl)                      | 20   | 41   | 22  | 24  |
| P27546 | Microtubule-associated protein 4 (MAP-4)                                                                                                                                                           | Map4 (Mtap4)                       | 94   | 41   | 33  | 36  |
| P07901 | Heat shock protein HSP 90-alpha (HSP 86) (Tumor-specific transplantation 86 kDa antigen) (TSTA)                                                                                                    | Hsp90aa1 (Hsp86) (Hsp86-1) (Hspca) | 1529 | 2324 | 134 | 146 |
| Q6P9Z1 | SWI/SNF-related matrix-associated actin-dependent regulator of chromatin subfamily D member 3 (60 kDa BRG-1/Brm-associated factor subunit C) (BRG1-associated factor 60C) (mBAF60c)                | Smarcd3 (Baf60c)                   | 29   | 19   | 46  | 50  |
| P38647 | Stress-70 protein, mitochondrial (75 kDa glucose-regulated protein) (GRP 75) (Heat shock 70 kDa protein 9) (Peptide-binding protein 74) (PBP74) (P66 MOT) (Mortalin)                               | Hspa9 (Grp75) (Hsp74) (Hspa9a)     | 33   | 33   | 12  | 13  |
| Q8BKC5 | Importin-5 (Imp5) (Importin subunit beta-3) (Karyopherin beta-3) (Ran-binding protein 5) (RanBP5)                                                                                                  | Ipo5 (Kpnb3) (Ranbp5)              | 185  | 91   | 12  | 13  |
| P10126 | Elongation factor 1-alpha 1 (EF-1-alpha-1) (Elongation factor 1 A-1) (eEF1A-1) (Elongation factor Tu) (EF-Tu)                                                                                      | Eef1a1 (Eef1a)                     | 2004 | 2344 | 305 | 330 |

|        |                                                                                                                                                                                                                                                                                                                                        |                                    |     |     |    |    |
|--------|----------------------------------------------------------------------------------------------------------------------------------------------------------------------------------------------------------------------------------------------------------------------------------------------------------------------------------------|------------------------------------|-----|-----|----|----|
| P08113 | Endoplasmic reticulum chaperone (Heat shock protein 90 kDa beta member 1) (94 kDa glucose-regulated protein) (GRP94) (ERP99) (Polymorphic tumor rejection antigen 1) (Tumor rejection antigen gp96)                                                                                                                                    | Hsp90b1 (Tra1) (Tra1)              | 221 | 298 | 25 | 27 |
| Q9Z104 | SWI/SNF-related matrix-associated actin-dependent regulator of chromatin subfamily E member 1-related (SMARCE1-related protein) (HMG box-containing protein 20B) (Structural DNA-binding protein BRAF35) (BRCA2-associated factor 35)                                                                                                  | Hmg20b (Braf35) (Hmgx2) (Smarce1r) | 30  | 20  | 14 | 15 |
| P11984 | T-complex protein 1 subunit alpha A (TCP-1-alpha) (CCT-alpha) (Tailless complex polypeptide 1A) (TCP-1-A)                                                                                                                                                                                                                              | Cct1 (Ccta) (Tcp1)                 | 29  | 66  | 14 | 15 |
| P70398 | Probable ubiquitin carboxyl-terminal hydrolase FAF-X (EC 3.1.2.15) (Ubiquitin thioesterase FAF-X) (Ubiquitin-specific-processing protease FAF-X) (Deubiquitinating enzyme FAF-X) (Fat facets protein-related, X-linked) (Ubiquitin-specific protease 9, X chromosome) (Ubiquitin carboxyl-terminal hydrolase FAM) (Fat facets homolog) | Usp9x (Faf1) (Fam)                 | 42  | 28  | 57 | 61 |
| Q8BKX6 | Serine/threonine-protein kinase SMG1 (SMG-1) (EC 2.7.11.1)                                                                                                                                                                                                                                                                             | Smg1 (Kiaa0421)                    | 33  | 27  | 30 | 32 |
| Q8VI56 | Low-density lipoprotein receptor-related protein 4 (LDLR dan)                                                                                                                                                                                                                                                                          | Lrp4 (Kiaa0816)                    | 77  | 30  | 19 | 20 |
| P16546 | Spectrin alpha chain, brain (Spectrin, non-erythroid alpha chain) (Alpha-II spectrin) (Fodrin alpha chain)                                                                                                                                                                                                                             | Sptan1 (Spna2) (Spta2)             | 68  | 86  | 66 | 69 |
| Q920R0 | Alsin (Amyotrophic lateral sclerosis protein 2 homolog)                                                                                                                                                                                                                                                                                | Als2                               | 74  | 88  | 72 | 75 |
| P62281 | 40S ribosomal protein S11                                                                                                                                                                                                                                                                                                              | Rps11                              | 166 | 132 | 27 | 28 |

|        |                                                                                                                                                                                                        |                                         |     |     |     |     |
|--------|--------------------------------------------------------------------------------------------------------------------------------------------------------------------------------------------------------|-----------------------------------------|-----|-----|-----|-----|
| Q9JM05 | E3 SUMO-protein ligase PIAS4 (Protein inhibitor of activated STAT protein 4) (Protein inhibitor of activated STAT protein gamma) (PIAS-gamma) (PIASy)                                                  | Pias4 (Piasg)                           | 26  | 29  | 162 | 165 |
| P62141 | Serine/threonine-protein phosphatase PP1-beta catalytic subunit (PP-1B) (EC 3.1.3.16)                                                                                                                  | Ppp1cb                                  | 177 | 57  | 4   | 4   |
| P12367 | cAMP-dependent protein kinase type II-alpha regulatory subunit                                                                                                                                         | Prkar2a                                 | 33  | 23  | 5   | 5   |
| Q9R1P1 | Proteasome subunit beta type-3 (EC 3.4.25.1) (Proteasome theta chain) (Proteasome chain 13) (Proteasome component C10-II)                                                                              | Psemb3                                  | 87  | 135 | 7   | 7   |
| P30416 | FK506-binding protein 4 (EC 5.2.1.8) (Peptidyl-prolyl cis-trans isomerase) (PPIase) (Rotamase) (HSP-binding immunophilin) (HBI) (FKBP52 protein) (52 kDa FK506-binding protein) (FKBP59) (p59 protein) | Fkbp4                                   | 40  | 62  | 8   | 8   |
| Q6P5F9 | Exportin-1 (Exp1) (Chromosome region maintenance 1 protein homolog)                                                                                                                                    | Xpo1 (Crm1)                             | 19  | 43  | 9   | 9   |
| O09061 | Proteasome subunit beta type-1 (EC 3.4.25.1) (Proteasome component C5) (Macropain subunit C5) (Multicatalytic endopeptidase complex subunit C5) (Proteasome gamma chain)                               | Psemb1                                  | 84  | 94  | 11  | 11  |
| Q9DB77 | Cytochrome b-c1 complex subunit 2, mitochondrial (Ubiquinol-cytochrome-c reductase complex core protein 2) (Core protein II) (Complex III subunit 2)                                                   | Uqcrc2                                  | 29  | 20  | 13  | 13  |
| Q8R4K2 | Interleukin-1 receptor-associated kinase 4 (IRAK-4) (EC 2.7.11.1)                                                                                                                                      | Irak4                                   | 32  | 47  | 22  | 22  |
| Q62261 | Spectrin beta chain, brain 1 (Spectrin, non-erythroid beta chain 1) (Beta-II spectrin) (Fodrin beta chain) (Embryonic liver fodrin)                                                                    | Sptbn1 (Elf) (Sptbn-2) (Sptnb2) (Sptb2) | 56  | 54  | 48  | 48  |

|        |                                                                                                                                                                                             |                                    |      |      |     |     |
|--------|---------------------------------------------------------------------------------------------------------------------------------------------------------------------------------------------|------------------------------------|------|------|-----|-----|
| P11499 | Heat shock protein HSP 90-beta (HSP 84) (Tumor-specific transplantation 84 kDa antigen) (TSTA)                                                                                              | Hsp90ab1 (Hsp84) (Hsp84-1) (Hspcb) | 2943 | 3523 | 208 | 205 |
| P58252 | Elongation factor 2 (EF-2)                                                                                                                                                                  | Eef2                               | 1630 | 1718 | 128 | 126 |
| P23116 | Eukaryotic translation initiation factor 3 subunit A (eIF3a) (Eukaryotic translation initiation factor 3 subunit 10) (eIF-3-theta) (eIF3 p167) (eIF3 p180) (eIF3 p185) (p162) (Centrosomin) | Eif3a (CsmA) (Eif3) (Eif3s10)      | 199  | 166  | 58  | 56  |
| P16406 | Glutamyl aminopeptidase (EC 3.4.11.7) (EAP) (Aminopeptidase A) (APA) (BP-1/6C3 antigen) (CD antigen CD249)                                                                                  | Enpep                              | 98   | 90   | 48  | 46  |
| Q8BGQ7 | Alanyl-tRNA synthetase, cytoplasmic (EC 6.1.1.7) (Alanine--tRNA ligase) (AlaRS)                                                                                                             | Aars                               | 179  | 216  | 23  | 22  |
| Q8R1B4 | Eukaryotic translation initiation factor 3 subunit C (eIF3c) (Eukaryotic translation initiation factor 3 subunit 8) (eIF3 p110)                                                             | Eif3c (Eif3s8)                     | 34   | 63   | 22  | 21  |
| Q9CPR4 | 60S ribosomal protein L17                                                                                                                                                                   | Rpl17                              | 187  | 135  | 15  | 14  |
| Q7TMY8 | E3 ubiquitin-protein ligase HUWE1 (EC 6.3.2.-) (HECT, UBA and WWE domain-containing protein 1) (Upstream regulatory element-binding protein 1) (URE-binding protein 1) (URE-B1) (E3Histone) | Huwe1 (Kiaa0312) (Ureb1)           | 33   | 91   | 39  | 36  |
| P35969 | Vascular endothelial growth factor receptor 1 (VEGFR-1) (EC 2.7.10.1) (Tyrosine-protein kinase receptor FLT) (FLT-1) (Embryonic receptor kinase 2)                                          | Flt1 (Emrk2) (Flt)                 | 29   | 36   | 35  | 32  |
| Q01853 | Transitional endoplasmic reticulum ATPase (TER ATPase) (15S Mg(2+)-ATPase p97 subunit) (Valosin-containing protein) (VCP)                                                                   | Vcp                                | 691  | 699  | 56  | 51  |
| Q9WTR0 | Matrix metalloproteinase-16 (MMP-16) (EC 3.4.24.-) (Membrane-type matrix metalloproteinase 3) (MT-MMP 3) (MTMMP3) (Membrane-type-3 matrix metalloproteinase) (MT3-MMP) (MT3MMP)             | Mmp16                              | 17   | 36   | 11  | 10  |

|        |                                                                                                                                                                                                                     |                                    |     |      |     |     |
|--------|---------------------------------------------------------------------------------------------------------------------------------------------------------------------------------------------------------------------|------------------------------------|-----|------|-----|-----|
| Q8CGC7 | Bifunctional aminoacyl-tRNA synthetase [Includes: Glutamyl-tRNA synthetase (EC 6.1.1.17) (Glutamate--tRNA ligase); Prolyl-tRNA synthetase (EC 6.1.1.15) (Proline--tRNA ligase)]                                     | Eprs (Qprs)                        | 130 | 102  | 32  | 29  |
| Q8VDD5 | Myosin-9 (Myosin heavy chain 9) (Myosin heavy chain, non-muscle IIa) (Non-muscle myosin heavy chain IIa) (NMMHC II-a) (NMMHC-IIA) (Cellular myosin heavy chain, type A) (Non-muscle myosin heavy chain-A) (NMMHC-A) | Myh9                               | 780 | 839  | 127 | 115 |
| Q9QZH3 | Peptidyl-prolyl cis-trans isomerase E (PPIase E) (Rotamase E) (EC 5.2.1.8) (Cyclophilin E) (Cyclophilin-33)                                                                                                         | Ppie (Cyp33)                       | 28  | 35   | 10  | 9   |
| Q9R0P5 | Destrin (Actin-depolymerizing factor) (ADF) (Sid 23)                                                                                                                                                                | Dstn (Dsn) (Sid23)                 | 61  | 81   | 8   | 7   |
| P70195 | Proteasome subunit beta type-7 (EC 3.4.25.1) (Proteasome subunit Z) (Macropain chain Z) (Multicatalytic endopeptidase complex chain Z)                                                                              | Psmb7 (Mmc14)                      | 39  | 40   | 8   | 7   |
| Q02053 | Ubiquitin-like modifier-activating enzyme 1 (Ubiquitin-activating enzyme E1) (Ubiquitin-like modifier-activating enzyme 1 X) (Ubiquitin-activating enzyme E1 X)                                                     | Uba1 (Sbx) (Ube1) (Ube1ax) (Ube1x) | 660 | 1086 | 63  | 55  |
| Q8VHE6 | Dynein heavy chain 5, axonemal (Axonemal beta dynein heavy chain 5) (Mdnah5) (Ciliary dynein heavy chain 5)                                                                                                         | Dnah5 (Dnahc5)                     | 47  | 44   | 83  | 72  |
| Q11011 | Puromycin-sensitive aminopeptidase (PSA) (EC 3.4.11.-)                                                                                                                                                              | Npepps (Psa)                       | 71  | 141  | 30  | 26  |
| Q9Z1Q9 | Valyl-tRNA synthetase (EC 6.1.1.9) (Valine--tRNA ligase) (ValRS) (Protein G7a)                                                                                                                                      | Vars (Bat6) (G7a) (Vars2)          | 380 | 302  | 37  | 32  |
| Q9JJK8 | Serine/threonine-protein kinase ATR (EC 2.7.11.1) (Ataxia telangiectasia and Rad3-related protein)                                                                                                                  | Atr                                | 20  | 25   | 72  | 62  |
| Q9D868 | Peptidyl-prolyl cis-trans isomerase H (PPIase H) (Rotamase H) (EC 5.2.1.8)                                                                                                                                          | Ppih                               | 55  | 31   | 7   | 6   |

|        |                                                                                                                                                                                                             |                       |     |     |    |    |
|--------|-------------------------------------------------------------------------------------------------------------------------------------------------------------------------------------------------------------|-----------------------|-----|-----|----|----|
| P67984 | 60S ribosomal protein L22 (Heparin-binding protein HBp15)                                                                                                                                                   | Rpl22                 | 59  | 48  | 7  | 6  |
| O88866 | Hormonally up-regulated neu tumor-associated kinase (EC 2.7.11.1) (Serine/threonine-protein kinase MAK-V)                                                                                                   | Hunk (Makv)           | 27  | 21  | 14 | 12 |
| P35979 | 60S ribosomal protein L12                                                                                                                                                                                   | Rpl12                 | 208 | 389 | 14 | 12 |
| P97784 | Cryptochrome-1                                                                                                                                                                                              | Cry1                  | 52  | 42  | 21 | 18 |
| Q9R194 | Cryptochrome-2                                                                                                                                                                                              | Cry2 (Kiaa0658)       | 52  | 42  | 21 | 18 |
| Q9CZM2 | 60S ribosomal protein L15                                                                                                                                                                                   | Rpl15                 | 225 | 107 | 21 | 18 |
| Q6ZWN5 | 40S ribosomal protein S9                                                                                                                                                                                    | Rps9                  | 459 | 248 | 47 | 40 |
| Q9JM52 | Misshapen-like kinase 1 (EC 2.7.11.1) (Mitogen-activated protein kinase kinase kinase 6) (MAPK/ERK kinase kinase 6) (MEK kinase kinase 6) (MEKKK 6) (Misshapen/NIK-related kinase) (GCK family kinase MiNK) | Mink1 (Map4k6) (Mink) | 18  | 54  | 13 | 11 |
| Q9CQN1 | Heat shock protein 75 kDa, mitochondrial (HSP 75) (Tumor necrosis factor type 1 receptor-associated protein) (TRAP-1) (TNFR-associated protein 1)                                                           | Trap1 (Hsp75)         | 197 | 335 | 13 | 11 |
| P14131 | 40S ribosomal protein S16                                                                                                                                                                                   | Rps16                 | 160 | 126 | 19 | 16 |
| P20029 | 78 kDa glucose-regulated protein (GRP 78) (Heat shock 70 kDa protein 5) (Immunoglobulin heavy chain-binding protein) (BiP)                                                                                  | Hspa5 (Grp78)         | 262 | 312 | 25 | 21 |
| Q99PP7 | E3 ubiquitin-protein ligase TRIM33 (EC 6.3.2.-) (Tripartite motif-containing protein 33) (Transcription intermediary factor 1-gamma) (TIF1-gamma) (Ectodermin homolog)                                      | Trim33 (Kiaa1113)     | 33  | 25  | 12 | 10 |
| P11983 | T-complex protein 1 subunit alpha B (TCP-1-alpha) (CCT-alpha) (Tailless complex polypeptide 1B) (TCP-1-B)                                                                                                   | Cct1 (Ccta) (Tcp1)    | 29  | 66  | 18 | 15 |

|        |                                                                                                                                                                                        |                               |     |     |    |    |
|--------|----------------------------------------------------------------------------------------------------------------------------------------------------------------------------------------|-------------------------------|-----|-----|----|----|
| Q64514 | Tripeptidyl-peptidase 2 (EC 3.4.14.10) (Tripeptidyl-peptidase II) (TPP-II) (Tripeptidyl aminopeptidase)                                                                                | Tpp2                          | 54  | 76  | 24 | 20 |
| P20357 | Microtubule-associated protein 2 (MAP-2)                                                                                                                                               | Map2 (Mtap2)                  | 50  | 22  | 30 | 25 |
| P11531 | Dystrophin                                                                                                                                                                             | Dmd                           | 25  | 16  | 66 | 55 |
| Q91XQ0 | Dynein heavy chain 8, axonemal (Axonemal beta dynein heavy chain 8) (Ciliary dynein heavy chain 8)                                                                                     | Dnahc8                        | 47  | 51  | 77 | 64 |
| P80316 | T-complex protein 1 subunit epsilon (TCP-1-epsilon) (CCT-epsilon)                                                                                                                      | Cct5 (Ccte) (Kiaa0098)        | 239 | 102 | 17 | 14 |
| P14206 | 40S ribosomal protein SA (Laminin receptor 1) (p40) (34/67 kDa laminin receptor) (37 kDa oncofetal antigen) (OFA/iLRP)                                                                 | Rpsa (Lamr1) (P40-8)          | 131 | 112 | 11 | 9  |
| Q6ZQ38 | Cullin-associated NEDD8-dissociated protein 1 (Cullin-associated and neddylation-dissociated protein 1) (p120 CAND1)                                                                   | Cand1 (D10Ert516e) (Kiaa0829) | 221 | 246 | 33 | 27 |
| Q80ZW0 | Serine/threonine-protein kinase 35 (EC 2.7.11.1)                                                                                                                                       | Stk35                         | 14  | 50  | 21 | 17 |
| Q64512 | Tyrosine-protein phosphatase non-receptor type 13 (EC 3.1.3.48) (Protein tyrosine phosphatase PTP-BL) (Protein-tyrosine phosphatase RIP) (Protein tyrosine phosphatase DPZPTP) (PTP36) | Ptpn13 (Ptp14)                | 28  | 27  | 26 | 21 |
| Q62407 | Striated muscle-specific serine/threonine protein kinase (EC 2.7.11.1) (Aortic preferentially expressed protein 1) (APEG-1)                                                            | Speg (Apeg1) (Kiaa1297)       | 26  | 20  | 31 | 25 |
| P54923 | [Protein ADP-ribosylarginine] hydrolase (ADP-ribosylarginine hydrolase) (EC 3.2.2.19) (ADP-ribose-L-arginine cleaving enzyme)                                                          | Adprh (Arh1)                  | 20  | 41  | 15 | 12 |
| Q9Z2U0 | Proteasome subunit alpha type-7 (EC 3.4.25.1) (Proteasome subunit RC6-1)                                                                                                               | Psm7                          | 121 | 253 | 15 | 12 |
| P12970 | 60S ribosomal protein L7a (Surfeit locus protein 3)                                                                                                                                    | Rpl7a (Surf-3) (Surf3)        | 111 | 31  | 15 | 12 |
| Q8BP67 | 60S ribosomal protein L24                                                                                                                                                              | Rpl24                         | 354 | 214 | 24 | 19 |

|        |                                                                                                                                                      |                                        |     |     |     |     |
|--------|------------------------------------------------------------------------------------------------------------------------------------------------------|----------------------------------------|-----|-----|-----|-----|
| Q80Z16 | E3 ubiquitin-protein ligase LRSAM1 (EC 6.3.2.-) (Leucine-rich repeat and sterile alpha motif-containing protein 1) (Tsg101-associated ligase)        | Lrsam1                                 | 19  | 35  | 19  | 15  |
| P62754 | 40S ribosomal protein S6 (Phosphoprotein NP33)                                                                                                       | Rps6                                   | 127 | 283 | 19  | 15  |
| Q9QWL7 | Keratin, type I cytoskeletal 17 (Cytokeratin-17) (CK-17) (Keratin-17) (K17)                                                                          | Krt17 (Krt1-17)                        | 38  | 46  | 14  | 11  |
| Q9JHU4 | Cytoplasmic dynein 1 heavy chain 1 (Cytoplasmic dynein heavy chain 1) (Dynein heavy chain, cytosolic)                                                | Dync1h1 (Dhc1) (Dnch1) (Dnchc1) (Dyhc) | 822 | 395 | 157 | 123 |
| P31254 | Ubiquitin-like modifier-activating enzyme 1 Y (Ubiquitin-activating enzyme E1 Y) (Ubiquitin-activating enzyme E1)                                    | Ube1ay (Sby) (Ube1y) (Ube1y1)          | 161 | 77  | 22  | 17  |
| Q8CGK3 | Lon protease homolog, mitochondrial (EC 3.4.21.-) (Lon protease-like protein) (LONP) (Mitochondrial ATP-dependent protease Lon) (Serine protease 15) | Lonp1 (Prss15)                         | 21  | 30  | 43  | 33  |
| P62702 | 40S ribosomal protein S4, X isoform                                                                                                                  | Rps4x (Rps4)                           | 402 | 304 | 30  | 23  |
| Q8JZQ2 | AFG3-like protein 2 (EC 3.4.24.-)                                                                                                                    | Afg3l2                                 | 15  | 27  | 17  | 13  |
| P16627 | Heat shock 70 kDa protein 1L (Heat shock 70 kDa protein 1-like) (Heat shock 70 kDa-like protein 1) (Spermatid-specific heat shock protein 70)        | Hspa1l (Hsc70t)                        | 319 | 238 | 33  | 25  |
| Q02956 | Protein kinase C zeta type (EC 2.7.11.13) (nPKC-zeta)                                                                                                | Prkcz (PkcZ)                           | 29  | 15  | 8   | 6   |
| P62751 | 60S ribosomal protein L23a                                                                                                                           | Rpl23a                                 | 75  | 49  | 16  | 12  |
| Q8K045 | Serine/threonine-protein kinase N3 (EC 2.7.11.13) (Protein kinase PKN-beta) (Protein-kinase C-related kinase 3)                                      | Pkn3 (Pknbeta)                         | 130 | 126 | 36  | 27  |
| P58681 | Toll-like receptor 7                                                                                                                                 | Tlr7                                   | 27  | 33  | 23  | 17  |
| P62264 | 40S ribosomal protein S14                                                                                                                            | Rps14                                  | 163 | 166 | 15  | 11  |
| P25444 | 40S ribosomal protein S2 (S4) (LLRep3 protein)                                                                                                       | Rps2 (Llrep3) (Rps4)                   | 217 | 50  | 26  | 19  |



|        |                                                                                                                                                                                                   |                                                                  |      |     |    |    |
|--------|---------------------------------------------------------------------------------------------------------------------------------------------------------------------------------------------------|------------------------------------------------------------------|------|-----|----|----|
| P62991 | Ubiquitin                                                                                                                                                                                         | Rps27a<br>(Uba80)<br>(Ubcep1);<br>Uba52<br>(Ubcep2);<br>Ubb; Ubc | 61   | 54  | 11 | 8  |
| Q61696 | Heat shock 70 kDa protein 1A (Heat shock 70 kDa protein 3) (HSP70.3) (Hsp68)                                                                                                                      | Hspa1a<br>(Hsp70-3)<br>(Hsp70A1)                                 | 266  | 236 | 33 | 24 |
| Q9CR57 | 60S ribosomal protein L14                                                                                                                                                                         | Rpl14                                                            | 508  | 391 | 33 | 24 |
| Q61699 | Heat shock protein 105 kDa (Heat shock-related 100 kDa protein E7I) (HSP-E7I) (Heat shock 110 kDa protein) (42 degrees C-HSP)                                                                     | Hsph1<br>(Hsp105)<br>(Hsp110)<br>(Kiaa0201)                      | 46   | 48  | 18 | 13 |
| P27659 | 60S ribosomal protein L3 (J1 protein)                                                                                                                                                             | Rpl3                                                             | 192  | 75  | 25 | 18 |
| Q99LG2 | Transportin-2 (Karyopherin beta-2b)                                                                                                                                                               | Tnpo2                                                            | 42   | 32  | 7  | 5  |
| Q60673 | Receptor-type tyrosine-protein phosphatase-like N (R-PTP-N) (PTP IA-2)                                                                                                                            | Ptprn (Ptp35)                                                    | 30   | 18  | 14 | 10 |
| P14148 | 60S ribosomal protein L7                                                                                                                                                                          | Rpl7                                                             | 145  | 52  | 14 | 10 |
| P14869 | 60S acidic ribosomal protein P0 (L10E)                                                                                                                                                            | Rplp0 (Arbp)                                                     | 115  | 334 | 28 | 20 |
| Q60692 | Proteasome subunit beta type-6 (EC 3.4.25.1) (Proteasome delta chain) (Macropain delta chain) (Multicatalytic endopeptidase complex delta chain) (Proteasome subunit Y)                           | Psmb6<br>(Lmp19)                                                 | 33   | 89  | 17 | 12 |
| P51410 | 60S ribosomal protein L9                                                                                                                                                                          | Rpl9                                                             | 187  | 212 | 17 | 12 |
| Q8BMJ2 | Leucyl-tRNA synthetase, cytoplasmic (EC 6.1.1.4) (Leucine--tRNA ligase) (LeuRS)                                                                                                                   | Lars                                                             | 52   | 45  | 47 | 33 |
| Q7TQI3 | Ubiquitin thioesterase OTUB1 (EC 3.1.2.-) (Otubain-1) (OTU domain-containing ubiquitin aldehyde-binding protein 1) (Ubiquitin-specific-processing protease OTUB1) (Deubiquitinating enzyme OTUB1) | Otub1                                                            | 152  | 109 | 10 | 7  |
| Q91YJ5 | Translation initiation factor IF-2, mitochondrial (IF-2Mt) (IF2(mt)) (IF-2(Mt))                                                                                                                   | Mtif2                                                            | 29   | 23  | 13 | 9  |
| Q9CWF2 | Tubulin beta-2B chain                                                                                                                                                                             | Tubb2b                                                           | 1435 | 825 | 86 | 59 |

|        |                                                                                                                                                                               |                              |      |     |    |    |
|--------|-------------------------------------------------------------------------------------------------------------------------------------------------------------------------------|------------------------------|------|-----|----|----|
| P99024 | Tubulin beta-5 chain                                                                                                                                                          | Tubb5                        | 1377 | 976 | 88 | 60 |
| Q80TP3 | E3 ubiquitin-protein ligase UBR5 (EC 6.3.2.-) (E3 ubiquitin-protein ligase, HECT domain-containing 1) (Hyperplastic discs protein homolog)                                    | Ubr5 (Edd) (Edd1) (Kiaa0896) | 27   | 17  | 43 | 29 |
| Q8C9S8 | Cysteine protease ATG4A (EC 3.4.22.-) (Autophagy-related protein 4 homolog A) (Autophagin-2) (Autophagy-related cysteine endopeptidase 2) (AUT-like 2 cysteine endopeptidase) | Atg4a (Apg4a) (Autl2)        | 26   | 21  | 6  | 4  |
| Q8K4L3 | Supervillin (Archvillin) (p205/p250)                                                                                                                                          | Svil                         | 25   | 22  | 18 | 12 |
| P68372 | Tubulin beta-2C chain                                                                                                                                                         | Tubb2c                       | 1300 | 891 | 78 | 51 |
| P42932 | T-complex protein 1 subunit theta (TCP-1-theta) (CCT-theta)                                                                                                                   | Cct8 (Cctq)                  | 197  | 57  | 23 | 15 |
| O70435 | Proteasome subunit alpha type-3 (EC 3.4.25.1) (Proteasome component C8) (Macropain subunit C8) (Multicatalytic endopeptidase complex subunit C8) (Proteasome subunit K)       | Psma3                        | 95   | 76  | 14 | 9  |
| Q9CXW4 | 60S ribosomal protein L11                                                                                                                                                     | Rpl11                        | 72   | 79  | 11 | 7  |
| Q7TMM9 | Tubulin beta-2A chain                                                                                                                                                         | Tubb2a (Tubb2)               | 1422 | 775 | 83 | 52 |
| Q80U87 | Ubiquitin carboxyl-terminal hydrolase 8 (EC 3.1.2.15) (Ubiquitin thioesterase 8) (Ubiquitin-specific-processing protease 8) (Deubiquitinating enzyme 8) (mUBPy)               | Usp8 (Kiaa0055) (Ubpy)       | 29   | 23  | 24 | 15 |
| P62717 | 60S ribosomal protein L18a                                                                                                                                                    | Rpl18a                       | 242  | 62  | 21 | 13 |
| P17156 | Heat shock-related 70 kDa protein 2 (Heat shock protein 70.2)                                                                                                                 | Hspa2 (Hcp70.2) (Hsp70-2)    | 964  | 544 | 60 | 37 |
| P84099 | 60S ribosomal protein L19                                                                                                                                                     | Rpl19                        | 39   | 47  | 13 | 8  |
| P62301 | 40S ribosomal protein S13                                                                                                                                                     | Rps13                        | 77   | 100 | 23 | 14 |
| Q9D1R9 | 60S ribosomal protein L34                                                                                                                                                     | Rpl34                        | 34   | 32  | 10 | 6  |

|        |                                                                                                                                                                                                                               |                             |      |     |     |    |
|--------|-------------------------------------------------------------------------------------------------------------------------------------------------------------------------------------------------------------------------------|-----------------------------|------|-----|-----|----|
| Q9EQZ6 | Rap guanine nucleotide exchange factor 4 (cAMP-regulated guanine nucleotide exchange factor II) (cAMP-GEFII) (Exchange factor directly activated by cAMP 2) (Epac 2) (cAMP-dependent Rap1 guanine-nucleotide exchange factor) | Rapgef4 (Cgef2) (Epac2)     | 47   | 23  | 20  | 12 |
| Q8R4K8 | Pappalysin-1 (EC 3.4.24.79) (Pregnancy-associated plasma protein A) (PAPP-A) (Insulin-like growth factor-dependent IGF-binding protein 4 protease) (IGF-dependent IGFBP-4 protease) (IGFBP-4ase)                              | Pappa                       | 41   | 43  | 25  | 15 |
| Q6NZJ6 | Eukaryotic translation initiation factor 4 gamma 1 (eIF-4-gamma 1) (eIF-4G 1) (eIF-4G1)                                                                                                                                       | Eif4g1                      | 47   | 113 | 30  | 18 |
| P63038 | 60 kDa heat shock protein, mitochondrial (Heat shock protein 60) (HSP-60) (Hsp60) (60 kDa chaperonin) (Chaperonin 60) (CPN60) (Mitochondrial matrix protein P1) (HSP-65)                                                      | Hspd1 (Hsp60)               | 15   | 32  | 22  | 13 |
| P80317 | T-complex protein 1 subunit zeta (TCP-1-zeta) (CCT-zeta) (CCT-zeta-1)                                                                                                                                                         | Cct6a (Cct6) (Cctz) (Cctz1) | 160  | 52  | 22  | 13 |
| P10630 | Eukaryotic initiation factor 4A-II (eIF-4A-II) (eIF4A-II) (EC 3.6.1.-) (ATP-dependent RNA helicase eIF4A-2)                                                                                                                   | Eif4a2 (Ddx2b)              | 194  | 78  | 17  | 10 |
| P63017 | Heat shock cognate 71 kDa protein (Heat shock 70 kDa protein 8)                                                                                                                                                               | Hspa8 (Hsc70) (Hsc73)       | 1719 | 959 | 119 | 70 |
| P05532 | Mast/stem cell growth factor receptor (SCFR) (EC 2.7.10.1) (Proto-oncogene tyrosine-protein kinase Kit) (c-kit) (CD antigen CD117)                                                                                            | Kit (SI)                    | 16   | 35  | 12  | 7  |
| P62900 | 60S ribosomal protein L31                                                                                                                                                                                                     | Rpl31                       | 124  | 62  | 12  | 7  |

|        |                                                                                                                                                  |                                |     |     |    |    |
|--------|--------------------------------------------------------------------------------------------------------------------------------------------------|--------------------------------|-----|-----|----|----|
| Q9JI78 | Peptide-N(4)-(N-acetyl-beta-glucosaminy)asparagine amidase (PNGase) (mPNGase) (EC 3.5.1.52) (Peptide:N-glycanase) (N-glycanase 1)                | Ngly1                          | 29  | 32  | 19 | 11 |
| P41105 | 60S ribosomal protein L28                                                                                                                        | Rpl28                          | 49  | 41  | 19 | 11 |
| Q9CZX8 | 40S ribosomal protein S19                                                                                                                        | Rps19                          | 206 | 146 | 19 | 11 |
| P47963 | 60S ribosomal protein L13 (A52)                                                                                                                  | Rpl13                          | 744 | 379 | 47 | 27 |
| P47757 | F-actin-capping protein subunit beta (CapZ beta)                                                                                                 | Capzb (Cappb1)                 | 107 | 68  | 7  | 4  |
| P26043 | Radixin (ESP10)                                                                                                                                  | Rdx                            | 127 | 106 | 23 | 13 |
| P49722 | Proteasome subunit alpha type-2 (EC 3.4.25.1) (Proteasome component C3) (Macropain subunit C3) (Multicatalytic endopeptidase complex subunit C3) | Psma2 (Lmpc3)                  | 188 | 103 | 16 | 9  |
| P97461 | 40S ribosomal protein S5                                                                                                                         | Rps5                           | 89  | 33  | 32 | 18 |
| Q8K2I9 | F-box only protein 18 (EC 3.6.1.-) (F-box DNA helicase 1)                                                                                        | Fbxo18 (Fbh1) (Fbx18)          | 30  | 23  | 9  | 5  |
| P63073 | Eukaryotic translation initiation factor 4E (eIF-4E) (eIF4E) (mRNA cap-binding protein) (eIF-4F 25 kDa subunit)                                  | Eif4e                          | 110 | 25  | 9  | 5  |
| Q9D6F9 | Tubulin beta-4 chain                                                                                                                             | Tubb4                          | 888 | 493 | 58 | 31 |
| Q61390 | T-complex protein 1 subunit zeta-2 (TCP-1-zeta-2) (CCT-zeta-2) (Cctz-2)                                                                          | Cct6b                          | 55  | 52  | 15 | 8  |
| P11103 | Poly [ADP-ribose] polymerase 1 (PARP-1) (EC 2.4.2.30) (ADPRT) (NAD(+) ADP-ribosyltransferase 1) (Poly[ADP-ribose] synthetase 1) (msPARP)         | Parp1 (Adprp) (Adprt) (Adprt1) | 21  | 26  | 17 | 9  |
| Q922F4 | Tubulin beta-6 chain                                                                                                                             | Tubb6                          | 583 | 382 | 40 | 21 |
| P97351 | 40S ribosomal protein S3a                                                                                                                        | Rps3a                          | 899 | 392 | 50 | 26 |
| Q9ERD7 | Tubulin beta-3 chain                                                                                                                             | Tubb3                          | 780 | 383 | 52 | 27 |
| Q80UE6 | Serine/threonine-protein kinase WNK4 (EC 2.7.11.1) (Protein kinase with no lysine 4) (Protein kinase, lysine-deficient 4)                        | Wnk4 (Prkwnk4)                 | 23  | 33  | 29 | 15 |

|                                    |                                                      |                                                                                                                                                                          |                      |     |     |     |     |
|------------------------------------|------------------------------------------------------|--------------------------------------------------------------------------------------------------------------------------------------------------------------------------|----------------------|-----|-----|-----|-----|
| macromolecule biosynthetic process | P06745                                               | Glucose-6-phosphate isomerase (GPI) (EC 5.3.1.9) (Phosphoglucose isomerase) (PGI) (Phosphohexose isomerase) (PHI) (Neuroleukin) (NLK)                                    | Gpi (Gpi1)           | 39  | 107 | 12  | 22  |
|                                    | P57776                                               | Elongation factor 1-delta (EF-1-delta)                                                                                                                                   | Eef1d                | 109 | 35  | 3   | 5   |
|                                    | P35980                                               | 60S ribosomal protein L18                                                                                                                                                | Rpl18                | 32  | 22  | 51  | 85  |
|                                    | Q6ZWX6                                               | Eukaryotic translation initiation factor 2 subunit 1 (Eukaryotic translation initiation factor 2 subunit alpha) (eIF-2-alpha) (EIF-2alpha) (EIF-2A)                      | Eif2s1 (Eif2a)       | 27  | 177 | 7   | 11  |
|                                    | P62082                                               | 40S ribosomal protein S7                                                                                                                                                 | Rps7                 | 104 | 126 | 9   | 14  |
|                                    | O55142                                               | 60S ribosomal protein L35a                                                                                                                                               | Rpl35a               | 24  | 50  | 4   | 6   |
|                                    | Q9QZ39                                               | Alpha-N-acetylgalactosaminide alpha-2,6-sialyltransferase 1 (EC 2.4.99.3) (GalNAc alpha-2,6-sialyltransferase I) (ST6GalNAc I) (Sialyltransferase 7A)                    | St6galnac1 (Siat7a)  | 27  | 18  | 11  | 16  |
|                                    | O70251                                               | Elongation factor 1-beta (EF-1-beta)                                                                                                                                     | Eef1b (Eef1b2)       | 39  | 102 | 7   | 10  |
|                                    | P17047                                               | Lysosome-associated membrane glycoprotein 2 (LAMP-2) (Lysosomal membrane glycoprotein type B) (LGP-B) (CD107 antigen-like family member B) (CD antigen CD107b)           | Lamp2 (Lamp-2)       | 26  | 29  | 8   | 11  |
|                                    | P28271                                               | Cytoplasmic aconitate hydratase (Aconitase) (EC 4.2.1.3) (Citrate hydro-lyase) (Iron-responsive element-binding protein 1) (IRE-BP 1) (Iron regulatory protein 1) (IRP1) | Aco1 (Ireb1) (Irebp) | 77  | 122 | 147 | 184 |
|                                    | Q811J3                                               | Iron-responsive element-binding protein 2 (IRE-BP 2) (Iron regulatory protein 2) (IRP2)                                                                                  | Ireb2 (Irp2)         | 69  | 119 | 142 | 176 |
|                                    | Q8BU30                                               | Isoleucyl-tRNA synthetase, cytoplasmic (EC 6.1.1.5) (Isoleucine--tRNA ligase) (IleRS) (IRS)                                                                              | Iars                 | 85  | 46  | 30  | 37  |
| Q8BGD9                             | Eukaryotic translation initiation factor 4B (eIF-4B) | Eif4b                                                                                                                                                                    | 238                  | 306 | 13  | 16  |     |

|        |                                                                                                                                                                                                       |                            |      |      |     |     |
|--------|-------------------------------------------------------------------------------------------------------------------------------------------------------------------------------------------------------|----------------------------|------|------|-----|-----|
| P59270 | Galactosylgalactosylxylosylprotein 3-beta-glucuronosyltransferase 2 (EC 2.4.1.135) (Beta-1,3-glucuronyltransferase 2) (UDP-glucuronosyltransferase-S) (Glucuronosyltransferase-S) (GlcAT-S) (GlcAT-D) | B3gat2 (Glcats)            | 29   | 16   | 9   | 11  |
| O08810 | 116 kDa U5 small nuclear ribonucleoprotein component (U5 snRNP-specific protein, 116 kDa) (U5-116 kDa) (Elongation factor Tu GTP-binding domain-containing protein 2)                                 | Eftud2 (Snrp116)           | 80   | 68   | 21  | 25  |
| Q8C3X4 | GTP-binding protein GUF1 homolog                                                                                                                                                                      | Guf1                       | 311  | 506  | 412 | 483 |
| P62270 | 40S ribosomal protein S18 (Ke-3) (Ke3)                                                                                                                                                                | Rps18                      | 210  | 209  | 15  | 17  |
| P62908 | 40S ribosomal protein S3                                                                                                                                                                              | Rps3                       | 778  | 762  | 39  | 44  |
| P19253 | 60S ribosomal protein L13a (Transplantation antigen P198) (Tum-P198 antigen)                                                                                                                          | Rpl13a (P198) (Tstap198-7) | 27   | 65   | 9   | 10  |
| P62631 | Elongation factor 1-alpha 2 (EF-1-alpha-2) (Elongation factor 1 A-2) (eEF1A-2) (Statin S1)                                                                                                            | Eef1a2 (Eef1a1) (Stn)      | 1275 | 1549 | 258 | 285 |
| Q9D8N0 | Elongation factor 1-gamma (EF-1-gamma) (eEF-1B gamma)                                                                                                                                                 | Eef1g                      | 31   | 85   | 11  | 12  |
| Q99KK9 | Probable histidyl-tRNA synthetase, mitochondrial (EC 6.1.1.21) (Histidine--tRNA ligase) (HisRS) (Histidine--tRNA ligase-like)                                                                         | Hars2 (Harsl)              | 20   | 41   | 22  | 24  |
| Q6P9Z1 | SWI/SNF-related matrix-associated actin-dependent regulator of chromatin subfamily D member 3 (60 kDa BRG-1/Brm-associated factor subunit C) (BRG1-associated factor 60C) (mBAF60c)                   | Smarcd3 (Baf60c)           | 29   | 19   | 46  | 50  |
| P10126 | Elongation factor 1-alpha 1 (EF-1-alpha-1) (Elongation factor 1 A-1) (eEF1A-1) (Elongation factor Tu) (EF-Tu)                                                                                         | Eef1a1 (Eef1a)             | 2004 | 2344 | 305 | 330 |

|        |                                                                                                                                                                                                                                                      |                                    |      |      |     |     |
|--------|------------------------------------------------------------------------------------------------------------------------------------------------------------------------------------------------------------------------------------------------------|------------------------------------|------|------|-----|-----|
| Q9Z104 | SWI/SNF-related matrix-associated actin-dependent regulator of chromatin subfamily E member 1-related (SMARCE1-related protein) (HMG box-containing protein 20B) (Structural DNA-binding protein BRAF35) (BRCA2-associated factor 35)                | Hmg20b (Braf35) (Hmgx2) (Smarce1r) | 30   | 20   | 14  | 15  |
| P62281 | 40S ribosomal protein S11                                                                                                                                                                                                                            | Rps11                              | 166  | 132  | 27  | 28  |
| P58252 | Elongation factor 2 (EF-2)                                                                                                                                                                                                                           | Eef2                               | 1630 | 1718 | 128 | 126 |
| P23116 | Eukaryotic translation initiation factor 3 subunit A (eIF3a) (Eukaryotic translation initiation factor 3 subunit 10) (eIF-3-theta) (eIF3 p167) (eIF3 p180) (eIF3 p185) (p162) (Centrosomin)                                                          | Eif3a (CsmA) (Eif3) (Eif3s10)      | 199  | 166  | 58  | 56  |
| Q8BGQ7 | Alanyl-tRNA synthetase, cytoplasmic (EC 6.1.1.7) (Alanine--tRNA ligase) (AlaRS)                                                                                                                                                                      | Aars                               | 179  | 216  | 23  | 22  |
| Q8R1B4 | Eukaryotic translation initiation factor 3 subunit C (eIF3c) (Eukaryotic translation initiation factor 3 subunit 8) (eIF3 p110)                                                                                                                      | Eif3c (Eif3s8)                     | 34   | 63   | 22  | 21  |
| Q9CPR4 | 60S ribosomal protein L17                                                                                                                                                                                                                            | Rpl17                              | 187  | 135  | 15  | 14  |
| Q8CGC7 | Bifunctional aminoacyl-tRNA synthetase [Includes: Glutamyl-tRNA synthetase (EC 6.1.1.17) (Glutamate--tRNA ligase); Prolyl-tRNA synthetase (EC 6.1.1.15) (Proline--tRNA ligase)]                                                                      | Eprs (Qprs)                        | 130  | 102  | 32  | 29  |
| Q9Z1Q9 | Valyl-tRNA synthetase (EC 6.1.1.9) (Valine--tRNA ligase) (ValRS) (Protein G7a)                                                                                                                                                                       | Vars (Bat6) (G7a) (Vars2)          | 380  | 302  | 37  | 32  |
| P67984 | 60S ribosomal protein L22 (Heparin-binding protein HBp15)                                                                                                                                                                                            | Rpl22                              | 59   | 48   | 7   | 6   |
| P35979 | 60S ribosomal protein L12                                                                                                                                                                                                                            | Rpl12                              | 208  | 389  | 14  | 12  |
| Q9CZM2 | 60S ribosomal protein L15                                                                                                                                                                                                                            | Rpl15                              | 225  | 107  | 21  | 18  |
| P11881 | Inositol 1,4,5-trisphosphate receptor type 1 (Type 1 inositol 1,4,5-trisphosphate receptor) (Type 1 InsP3 receptor) (IP3 receptor isoform 1) (InsP3R1) (Inositol 1,4,5-trisphosphate-binding protein P400) (Purkinje cell protein 1) (Protein PCD-6) | ltp1 (Insp3r) (Pcd6) (Pcp1)        | 37   | 42   | 48  | 41  |

|        |                                                                                                                                                                                                                                        |                                                   |     |     |    |    |
|--------|----------------------------------------------------------------------------------------------------------------------------------------------------------------------------------------------------------------------------------------|---------------------------------------------------|-----|-----|----|----|
| Q6ZWN5 | 40S ribosomal protein S9                                                                                                                                                                                                               | Rps9                                              | 459 | 248 | 47 | 40 |
| P14131 | 40S ribosomal protein S16                                                                                                                                                                                                              | Rps16                                             | 160 | 126 | 19 | 16 |
| P14206 | 40S ribosomal protein SA (Laminin receptor 1) (p40) (34/67 kDa laminin receptor) (37 kDa oncofetal antigen) (OFA/iLRP)                                                                                                                 | Rpsa (Lamr1) (P40-8)                              | 131 | 112 | 11 | 9  |
| P12970 | 60S ribosomal protein L7a (Surfeit locus protein 3)                                                                                                                                                                                    | Rpl7a (Surf-3) (Surf3)                            | 111 | 31  | 15 | 12 |
| Q8BP67 | 60S ribosomal protein L24                                                                                                                                                                                                              | Rpl24                                             | 354 | 214 | 24 | 19 |
| P62754 | 40S ribosomal protein S6 (Phosphoprotein NP33)                                                                                                                                                                                         | Rps6                                              | 127 | 283 | 19 | 15 |
| Q9QWL7 | Keratin, type I cytoskeletal 17 (Cytokeratin-17) (CK-17) (Keratin-17) (K17)                                                                                                                                                            | Krt17 (Krt1-17)                                   | 38  | 46  | 14 | 11 |
| P62702 | 40S ribosomal protein S4, X isoform                                                                                                                                                                                                    | Rps4x (Rps4)                                      | 402 | 304 | 30 | 23 |
| P47856 | Glucosamine--fructose-6-phosphate aminotransferase [isomerizing] 1 (EC 2.6.1.16) (Glutamine:fructose 6 phosphate amidotransferase 1) (GFAT 1) (GFAT1) (D-fructose-6-phosphate amidotransferase 1) (Hexosephosphate aminotransferase 1) | Gfpt1 (Gfpt)                                      | 17  | 29  | 17 | 13 |
| P62751 | 60S ribosomal protein L23a                                                                                                                                                                                                             | Rpl23a                                            | 75  | 49  | 16 | 12 |
| P58681 | Toll-like receptor 7                                                                                                                                                                                                                   | Tlr7                                              | 27  | 33  | 23 | 17 |
| P62264 | 40S ribosomal protein S14                                                                                                                                                                                                              | Rps14                                             | 163 | 166 | 15 | 11 |
| P25444 | 40S ribosomal protein S2 (S4) (LLRep3 protein)                                                                                                                                                                                         | Rps2 (Llrep3) (Rps4)                              | 217 | 50  | 26 | 19 |
| P62991 | Ubiquitin                                                                                                                                                                                                                              | Rps27a (Uba80) (Ubcep1); Uba52 (Ubcep2); Ubb; Ubc | 61  | 54  | 11 | 8  |
| Q9CR57 | 60S ribosomal protein L14                                                                                                                                                                                                              | Rpl14                                             | 508 | 391 | 33 | 24 |
| P27659 | 60S ribosomal protein L3 (J1 protein)                                                                                                                                                                                                  | Rpl3                                              | 192 | 75  | 25 | 18 |
| P14148 | 60S ribosomal protein L7                                                                                                                                                                                                               | Rpl7                                              | 145 | 52  | 14 | 10 |
| P14869 | 60S acidic ribosomal protein P0 (L10E)                                                                                                                                                                                                 | Rplp0 (Arbp)                                      | 115 | 334 | 28 | 20 |
| P17751 | Triosephosphate isomerase (TIM) (EC 5.3.1.1) (Triose-phosphate isomerase)                                                                                                                                                              | Tpi1 (Tpi)                                        | 706 | 519 | 35 | 25 |



|                                       |        |                                                                                                                 |                 |     |      |    |     |
|---------------------------------------|--------|-----------------------------------------------------------------------------------------------------------------|-----------------|-----|------|----|-----|
|                                       | P51410 | 60S ribosomal protein L9                                                                                        | Rpl9            | 187 | 212  | 17 | 12  |
|                                       | Q8BMJ2 | Leucyl-tRNA synthetase, cytoplasmic (EC 6.1.1.4) (Leucine--tRNA ligase) (LeuRS)                                 | Lars            | 52  | 45   | 47 | 33  |
|                                       | Q91YJ5 | Translation initiation factor IF-2, mitochondrial (IF-2Mt) (IF2(mt)) (IF-2(Mt))                                 | Mtif2           | 29  | 23   | 13 | 9   |
|                                       | Q9CXW4 | 60S ribosomal protein L11                                                                                       | Rpl11           | 72  | 79   | 11 | 7   |
|                                       | P62717 | 60S ribosomal protein L18a                                                                                      | Rpl18a          | 242 | 62   | 21 | 13  |
|                                       | P84099 | 60S ribosomal protein L19                                                                                       | Rpl19           | 39  | 47   | 13 | 8   |
|                                       | P62301 | 40S ribosomal protein S13                                                                                       | Rps13           | 77  | 100  | 23 | 14  |
|                                       | Q9D1R9 | 60S ribosomal protein L34                                                                                       | Rpl34           | 34  | 32   | 10 | 6   |
|                                       | Q6NZJ6 | Eukaryotic translation initiation factor 4 gamma 1 (eIF-4-gamma 1) (eIF-4G 1) (eIF-4G1)                         | Eif4g1          | 47  | 113  | 30 | 18  |
|                                       | P10630 | Eukaryotic initiation factor 4A-II (eIF-4A-II) (eIF4A-II) (EC 3.6.1.-) (ATP-dependent RNA helicase eIF4A-2)     | Eif4a2 (Ddx2b)  | 194 | 78   | 17 | 10  |
|                                       | P62900 | 60S ribosomal protein L31                                                                                       | Rpl31           | 124 | 62   | 12 | 7   |
|                                       | P41105 | 60S ribosomal protein L28                                                                                       | Rpl28           | 49  | 41   | 19 | 11  |
|                                       | Q9CZX8 | 40S ribosomal protein S19                                                                                       | Rps19           | 206 | 146  | 19 | 11  |
|                                       | P47963 | 60S ribosomal protein L13 (A52)                                                                                 | Rpl13           | 744 | 379  | 47 | 27  |
|                                       | P97461 | 40S ribosomal protein S5                                                                                        | Rps5            | 89  | 33   | 32 | 18  |
|                                       | P63073 | Eukaryotic translation initiation factor 4E (eIF-4E) (eIF4E) (mRNA cap-binding protein) (eIF-4F 25 kDa subunit) | Eif4e           | 110 | 25   | 9  | 5   |
|                                       | P97351 | 40S ribosomal protein S3a                                                                                       | Rps3a           | 899 | 392  | 50 | 26  |
| organelle organization and biogenesis | P04104 | Keratin, type II cytoskeletal 1 (Cytokeratin-1) (CK-1) (Keratin-1) (K1) (67 kDa cytokeratin) (Krt1 protein)     | Krt1 (Krt2-1)   | 87  | 124  | 14 | 27  |
|                                       | Q7TSG3 | F-box only protein 5 (Early mitotic inhibitor 1)                                                                | Fbxo5 (Emi1)    | 15  | 27   | 5  | 9   |
|                                       | Q61414 | Keratin, type I cytoskeletal 15 (Cytokeratin-15) (CK-15) (Keratin-15) (K15)                                     | Krt15 (Krt1-15) | 37  | 46   | 4  | 7   |
|                                       | P62962 | Profilin-1 (Profilin I)                                                                                         | Pfn1            | 30  | 93   | 4  | 7   |
|                                       | P18760 | Cofilin-1 (Cofilin, non-muscle isoform)                                                                         | Cfl1            | 959 | 2552 | 70 | 122 |
|                                       | Q8CGP2 | Histone H2B type 1-P                                                                                            | Hist1h2bp       | 436 | 999  | 46 | 77  |

|        |                                                                                                               |                                                                                                                                                    |      |      |    |    |
|--------|---------------------------------------------------------------------------------------------------------------|----------------------------------------------------------------------------------------------------------------------------------------------------|------|------|----|----|
| P62806 | Histone H4                                                                                                    | Hist1h4a;<br>Hist1h4b (H4-53); Hist1h4c (H4-12); Hist1h4d; Hist1h4f; Hist1h4h; Hist1h4i; Hist1h4j; Hist1h4k; Hist1h4m; Hist2h4a (Hist2h4); Hist4h4 | 815  | 1617 | 47 | 78 |
| Q922U2 | Keratin, type II cytoskeletal 5 (Cytokeratin-5) (CK-5) (Keratin-5) (K5)                                       | Krt5 (Krt2-5)                                                                                                                                      | 396  | 550  | 23 | 38 |
| Q64475 | Histone H2B type 1-B (h2B-143)                                                                                | Hist1h2bb                                                                                                                                          | 436  | 999  | 46 | 75 |
| Q80Y17 | Lethal(2) giant larvae protein homolog 1 (LLGL) (Mlg1) (Mgl-1)                                                | Llg1 (Llg1h)                                                                                                                                       | 30   | 29   | 7  | 11 |
| P63001 | Ras-related C3 botulinum toxin substrate 1 (p21-Rac1)                                                         | Rac1                                                                                                                                               | 31   | 99   | 7  | 11 |
| P62082 | 40S ribosomal protein S7                                                                                      | Rps7                                                                                                                                               | 104  | 126  | 9  | 14 |
| Q3THW5 | Histone H2A.V (H2A.F/Z)                                                                                       | H2afv (H2av)                                                                                                                                       | 297  | 426  | 11 | 16 |
| P07744 | Keratin, type II cytoskeletal 4 (Cytokeratin-4) (CK-4) (Keratin-4) (K4) (Cytoskeletal 57 kDa keratin)         | Krt4 (Krt2-4)                                                                                                                                      | 36   | 74   | 19 | 27 |
| Q8VHX6 | Filamin-C (Gamma-filamin) (Filamin-2) (FLN-C) (Actin-binding-like protein) (ABP-L) (ABP-280-like protein)     | Flnc (Abpl) (Fln2)                                                                                                                                 | 33   | 115  | 18 | 25 |
| P68510 | 14-3-3 protein eta                                                                                            | Ywhah                                                                                                                                              | 707  | 962  | 58 | 80 |
| P70696 | Histone H2B type 1-A (Histone H2B, testis) (Testis-specific histone H2B)                                      | Hist1h2ba (Th2b)                                                                                                                                   | 146  | 378  | 37 | 51 |
| P05214 | Tubulin alpha-3 chain (Tubulin alpha-3/alpha-7 chain) (Alpha-tubulin 3/7) (Alpha-tubulin isotype M-alpha-3/7) | Tuba3a (Tuba3); Tuba3b (Tuba7)                                                                                                                     | 1112 | 1288 | 61 | 84 |

|        |                                                                                                                                                                                                                             |                                         |      |      |     |     |
|--------|-----------------------------------------------------------------------------------------------------------------------------------------------------------------------------------------------------------------------------|-----------------------------------------|------|------|-----|-----|
| Q61937 | Nucleophosmin (NPM) (Nucleolar phosphoprotein B23) (Numatrin) (Nucleolar protein NO38)                                                                                                                                      | Npm1                                    | 92   | 66   | 11  | 15  |
| Q99M73 | Keratin, type II cuticular Hb4 (Type II hair keratin Hb4) (Keratin-84) (K84) (65 kDa type II keratin)                                                                                                                       | Krt84 (Krt2-16) (Krt84) (Krt84) (Krt84) | 36   | 74   | 14  | 19  |
| Q9Z277 | Bromodomain adjacent to zinc finger domain protein 1B (Williams-Beuren syndrome chromosomal region 9 protein homolog) (WBRS9)                                                                                               | Baz1b (Wbscr9)                          | 43   | 17   | 26  | 34  |
| Q921C5 | Protein bicaudal D homolog 2 (Bic-D 2)                                                                                                                                                                                      | Bicd2 (Kiaa0699)                        | 31   | 23   | 26  | 34  |
| Q61595 | Kinectin                                                                                                                                                                                                                    | Ktn1                                    | 15   | 50   | 43  | 56  |
| P47753 | F-actin-capping protein subunit alpha-1 (CapZ alpha-1)                                                                                                                                                                      | Capza1 (Cappa1)                         | 60   | 33   | 7   | 9   |
| Q07133 | Histone H1t (Testicular H1 histone)                                                                                                                                                                                         | Hist1h1t (H1ft) (H1t)                   | 46   | 72   | 54  | 69  |
| P27661 | Histone H2A.x (H2a/x)                                                                                                                                                                                                       | H2afx (H2a.x) (H2ax) (Hist5-2ax)        | 301  | 426  | 15  | 19  |
| P20152 | Vimentin                                                                                                                                                                                                                    | Vim                                     | 1749 | 2397 | 125 | 157 |
| Q8R2X8 | Golgin-45 (Basic leucine zipper nuclear factor 1)                                                                                                                                                                           | Blzf1                                   | 28   | 22   | 13  | 16  |
| Q61466 | SWI/SNF-related matrix-associated actin-dependent regulator of chromatin subfamily D member 1 (SWI/SNF complex 60 kDa subunit) (60 kDa BRG-1/Brm-associated factor subunit A) (BRG1-associated factor 60A) (D15KZ1 protein) | Smarcd1 (Baf60a) (D15Kz1)               | 27   | 29   | 13  | 16  |
| P49025 | Citron Rho-interacting kinase (CRIK) (EC 2.7.11.1) (Rho-interacting, serine/threonine-protein kinase 21)                                                                                                                    | Cit                                     | 49   | 67   | 67  | 81  |
| P47754 | F-actin-capping protein subunit alpha-2 (CapZ alpha-2)                                                                                                                                                                      | Capza2 (Cappa2)                         | 60   | 33   | 5   | 6   |
| Q60848 | Lymphocyte-specific helicase (EC 3.6.1.-) (Proliferation associated SNF2-like protein)                                                                                                                                      | Hells (Lsh) (Pasg)                      | 37   | 35   | 10  | 12  |

|        |                                                                                                                                                                                         |                            |     |     |    |    |
|--------|-----------------------------------------------------------------------------------------------------------------------------------------------------------------------------------------|----------------------------|-----|-----|----|----|
| P05784 | Keratin, type I cytoskeletal 18 (Cytokeratin-18) (CK-18) (Keratin-18) (K18) (Cytokeratin endo B) (Keratin D)                                                                            | Krt18 (Kerd) (Krt1-18)     | 37  | 46  | 10 | 12 |
| P54227 | Stathmin (Phosphoprotein p19) (pp19) (Leukemia-associated phosphoprotein p18) (Oncoprotein 18) (Op18) (pp17) (Prosolin) (Metablastin) (Protein Pr22) (Leukemia-associated gene protein) | Stmn1 (Lag) (Lap18) (Pr22) | 121 | 120 | 10 | 12 |
| Q60575 | Kinesin-like protein KIF1B                                                                                                                                                              | Kif1b                      | 45  | 95  | 30 | 36 |
| Q61771 | Kinesin-like protein KIF3B (Microtubule plus end-directed kinesin motor 3B)                                                                                                             | Kif3b                      | 30  | 51  | 16 | 19 |
| Q9R0K7 | Plasma membrane calcium-transporting ATPase 2 (PMCA2) (EC 3.6.3.8) (Plasma membrane calcium ATPase isoform 2) (Plasma membrane calcium pump isoform 2)                                  | Atp2b2 (Pmca2)             | 32  | 27  | 70 | 83 |
| Q9WUM4 | Coronin-1C (Coronin-3)                                                                                                                                                                  | Coro1c                     | 42  | 28  | 18 | 21 |
| Q6GSS7 | Histone H2A type 2-A (H2A.2) (H2a-614) (H2a-615)                                                                                                                                        | Hist2h2aa1; Hist2h2aa2     | 505 | 763 | 18 | 21 |
| Q5SPW0 | Vacuolar protein sorting-associated protein 54 (Tumor antigen SLP-8p homolog)                                                                                                           | Vps54                      | 36  | 28  | 13 | 15 |
| P48754 | Breast cancer type 1 susceptibility protein homolog                                                                                                                                     | Brca1                      | 28  | 25  | 26 | 30 |
| Q62418 | Drebrin-like protein (SH3 domain-containing protein 7) (Actin-binding protein 1)                                                                                                        | Dbnl (Abp1) (Sh3p7)        | 24  | 39  | 7  | 8  |
| Q9Z2K1 | Keratin, type I cytoskeletal 16 (Cytokeratin-16) (CK-16) (Keratin-16) (K16)                                                                                                             | Krt16 (Krt1-16)            | 37  | 37  | 7  | 8  |
| P62270 | 40S ribosomal protein S18 (Ke-3) (Ke3)                                                                                                                                                  | Rps18                      | 210 | 209 | 15 | 17 |
| P55200 | Histone-lysine N-methyltransferase HRX (EC 2.1.1.43) (Zinc finger protein HRX) (ALL-1)                                                                                                  | Mll (All1) (Hrx) (Mll1)    | 67  | 26  | 39 | 44 |
| P40124 | Adenylyl cyclase-associated protein 1 (CAP 1)                                                                                                                                           | Cap1 (Cap)                 | 22  | 43  | 8  | 9  |

|        |                                                                                                                                                                                                                                       |                                    |     |     |    |    |
|--------|---------------------------------------------------------------------------------------------------------------------------------------------------------------------------------------------------------------------------------------|------------------------------------|-----|-----|----|----|
| P41230 | Histone demethylase JARID1C (EC 1.14.11.-) (Jumonji/ARID domain-containing protein 1C) (Protein SmcX) (Protein Xe169)                                                                                                                 | Jarid1c (Kiaa0234) (Smcx) (Xe169)  | 34  | 32  | 26 | 29 |
| P19001 | Keratin, type I cytoskeletal 19 (Cytokeratin-19) (CK-19) (Keratin-19) (K19)                                                                                                                                                           | Krt19 (Krt1-19)                    | 37  | 46  | 11 | 12 |
| Q9QUI0 | Transforming protein RhoA                                                                                                                                                                                                             | Rhoa (Arha) (Arha2)                | 117 | 231 | 11 | 12 |
| P27546 | Microtubule-associated protein 4 (MAP-4)                                                                                                                                                                                              | Map4 (Mtap4)                       | 94  | 41  | 33 | 36 |
| Q6P9Z1 | SWI/SNF-related matrix-associated actin-dependent regulator of chromatin subfamily D member 3 (60 kDa BRG-1/Brm-associated factor subunit C) (BRG1-associated factor 60C) (mBAF60c)                                                   | Smarcd3 (Baf60c)                   | 29  | 19  | 46 | 50 |
| Q9Z104 | SWI/SNF-related matrix-associated actin-dependent regulator of chromatin subfamily E member 1-related (SMARCE1-related protein) (HMG box-containing protein 20B) (Structural DNA-binding protein BRAF35) (BRCA2-associated factor 35) | Hmg20b (Braf35) (Hmgx2) (Smarce1r) | 30  | 20  | 14 | 15 |
| P62242 | 40S ribosomal protein S8                                                                                                                                                                                                              | Rps8                               | 479 | 372 | 18 | 19 |
| P16546 | Spectrin alpha chain, brain (Spectrin, non-erythroid alpha chain) (Alpha-II spectrin) (Fodrin alpha chain)                                                                                                                            | Sptan1 (Spna2) (Spta2)             | 68  | 86  | 66 | 69 |
| Q920R0 | Alsin (Amyotrophic lateral sclerosis protein 2 homolog)                                                                                                                                                                               | Als2                               | 74  | 88  | 72 | 75 |
| P26039 | Talin-1                                                                                                                                                                                                                               | Tln1 (Tln)                         | 123 | 161 | 41 | 42 |
| Q8C0N1 | Kinesin-like protein KIF2B                                                                                                                                                                                                            | Kif2b                              | 17  | 26  | 8  | 8  |
| Q9R190 | Metastasis-associated protein MTA2 (Metastasis-associated 1-like 1)                                                                                                                                                                   | Mta2 (Mta111)                      | 27  | 26  | 9  | 9  |
| Q61781 | Keratin, type I cytoskeletal 14 (Cytokeratin-14) (CK-14) (Keratin-14) (K14)                                                                                                                                                           | Krt14 (Krt1-14)                    | 38  | 37  | 10 | 10 |
| Q9CQ60 | 6-phosphogluconolactonase (6PGL) (EC 3.1.1.31)                                                                                                                                                                                        | Pgls                               | 148 | 41  | 11 | 11 |
| P30681 | High mobility group protein B2 (High mobility group protein 2) (HMG-2)                                                                                                                                                                | Hmgb2 (Hmg2)                       | 94  | 222 | 24 | 24 |

|        |                                                                                                                                                                                             |                                       |     |     |     |     |
|--------|---------------------------------------------------------------------------------------------------------------------------------------------------------------------------------------------|---------------------------------------|-----|-----|-----|-----|
| Q62261 | Spectrin beta chain, brain 1 (Spectrin, non-erythroid beta chain 1) (Beta-II spectrin) (Fodrin beta chain) (Embryonic liver fodrin)                                                         | Sptbn1 (Elf) (Spnb-2) (Spnb2) (Sptb2) | 56  | 54  | 48  | 48  |
| Q9QYX7 | Protein piccolo (Aczonin) (Multidomain presynaptic cytomatrix protein) (Brain-derived HLMN protein)                                                                                         | Pclo (Acz)                            | 101 | 117 | 114 | 114 |
| O08638 | Myosin-11 (Myosin heavy chain 11) (Myosin heavy chain, smooth muscle isoform) (SMMHC)                                                                                                       | Myh11                                 | 211 | 221 | 79  | 76  |
| Q9QXL1 | Kinesin-like protein KIF21B (Kinesin-like protein KIF6)                                                                                                                                     | Kif21b (Kif6)                         | 22  | 45  | 26  | 25  |
| Q61768 | Kinesin-1 heavy chain (Ubiquitous kinesin heavy chain) (UKHC) (Conventional kinesin heavy chain)                                                                                            | Kif5b (Khcs) (Kns1)                   | 102 | 303 | 43  | 41  |
| Q6ZPK0 | PHD finger protein 21A (BRAF35-HDAC complex protein BHC80) (mBHC80) (BHC80a)                                                                                                                | Phf21a (Bhc80) (Kiaa1696) (Pff1)      | 28  | 37  | 20  | 19  |
| P97412 | Lysosomal-trafficking regulator (Beige protein) (CHS1 homolog)                                                                                                                              | Lyst (Bg) (Chs1)                      | 46  | 27  | 33  | 31  |
| Q9D6Z1 | Nucleolar protein 5A (Nucleolar protein Nop56)                                                                                                                                              | Nol5a (Nop56)                         | 38  | 39  | 14  | 13  |
| P08730 | Keratin, type I cytoskeletal 13 (Cytokeratin-13) (CK-13) (Keratin-13) (K13) (47 kDa cytokeratin)                                                                                            | Krt13 (Krt1-13)                       | 37  | 46  | 13  | 12  |
| Q7TMY8 | E3 ubiquitin-protein ligase HUWE1 (EC 6.3.2.-) (HECT, UBA and WWE domain-containing protein 1) (Upstream regulatory element-binding protein 1) (URE-binding protein 1) (URE-B1) (E3Histone) | Huwe1 (Kiaa0312) (Ureb1)              | 33  | 91  | 39  | 36  |
| P03995 | Glial fibrillary acidic protein (GFAP)                                                                                                                                                      | Gfap                                  | 63  | 90  | 22  | 20  |

|        |                                                                                                                                                                                                                     |                        |     |     |     |     |
|--------|---------------------------------------------------------------------------------------------------------------------------------------------------------------------------------------------------------------------|------------------------|-----|-----|-----|-----|
| Q8VDD5 | Myosin-9 (Myosin heavy chain 9) (Myosin heavy chain, non-muscle IIa) (Non-muscle myosin heavy chain IIa) (NMMHC II-a) (NMMHC-IIA) (Cellular myosin heavy chain, type A) (Non-muscle myosin heavy chain-A) (NMMHC-A) | Myh9                   | 780 | 839 | 127 | 115 |
| P02535 | Keratin, type I cytoskeletal 10 (Cytokeratin-10) (CK-10) (Keratin-10) (K10) (56 kDa cytokeratin) (Keratin, type I cytoskeletal 59 kDa)                                                                              | Krt10 (Krt1-10)        | 252 | 152 | 19  | 17  |
| Q922G7 | Tektin-2 (Testicular tektin) (Tektin-t)                                                                                                                                                                             | Tekt2                  | 25  | 26  | 9   | 8   |
| P43277 | Histone H1.3 (H1 VAR.4) (H1d)                                                                                                                                                                                       | Hist1h1d (H1f3)        | 78  | 99  | 18  | 16  |
| Q99104 | Myosin-Va (Dilute myosin heavy chain, non-muscle)                                                                                                                                                                   | Myo5a (Dilute)         | 28  | 34  | 35  | 31  |
| P33173 | Kinesin-like protein KIF1A (Axonal transporter of synaptic vesicles)                                                                                                                                                | Kif1a (Atsv) (Kif1)    | 45  | 108 | 25  | 22  |
| Q9R0P5 | Destrin (Actin-depolymerizing factor) (ADF) (Sid 23)                                                                                                                                                                | Dstn (Dsn) (Sid23)     | 61  | 81  | 8   | 7   |
| Q8VHE6 | Dynein heavy chain 5, axonemal (Axonemal beta dynein heavy chain 5) (Mdnah5) (Ciliary dynein heavy chain 5)                                                                                                         | Dnah5 (Dnahc5)         | 47  | 44  | 83  | 72  |
| P67984 | 60S ribosomal protein L22 (Heparin-binding protein HBp15)                                                                                                                                                           | Rpl22                  | 59  | 48  | 7   | 6   |
| P35979 | 60S ribosomal protein L12                                                                                                                                                                                           | Rpl12                  | 208 | 389 | 14  | 12  |
| P14131 | 40S ribosomal protein S16                                                                                                                                                                                           | Rps16                  | 160 | 126 | 19  | 16  |
| P20357 | Microtubule-associated protein 2 (MAP-2)                                                                                                                                                                            | Map2 (Mtap2)           | 50  | 22  | 30  | 25  |
| Q91XQ0 | Dynein heavy chain 8, axonemal (Axonemal beta dynein heavy chain 8) (Ciliary dynein heavy chain 8)                                                                                                                  | Dnahc8                 | 47  | 51  | 77  | 64  |
| Q6URW6 | Myosin-14 (Myosin heavy chain 14) (Myosin heavy chain, non-muscle IIc) (Non-muscle myosin heavy chain IIc) (NMHC II-C)                                                                                              | Myh14                  | 60  | 48  | 53  | 44  |
| P12970 | 60S ribosomal protein L7a (Surfeit locus protein 3)                                                                                                                                                                 | Rpl7a (Surf-3) (Surf3) | 111 | 31  | 15  | 12  |

|        |                                                                                                                                               |                                        |     |     |     |     |
|--------|-----------------------------------------------------------------------------------------------------------------------------------------------|----------------------------------------|-----|-----|-----|-----|
| Q99MD9 | Nuclear autoantigenic sperm protein (NASP)                                                                                                    | Nasp                                   | 365 | 293 | 34  | 27  |
| Q91ZU6 | Bullous pemphigoid antigen 1, isoforms 1/2/3/4 (BPA) (Hemidesmosomal plaque protein) (Dystonia musculorum protein) (Dystonin)                 | Dst (Bpag1)                            | 78  | 38  | 126 | 100 |
| P62754 | 40S ribosomal protein S6 (Phosphoprotein NP33)                                                                                                | Rps6                                   | 127 | 283 | 19  | 15  |
| Q9QWL7 | Keratin, type I cytoskeletal 17 (Cytokeratin-17) (CK-17) (Keratin-17) (K17)                                                                   | Krt17 (Krt1-17)                        | 38  | 46  | 14  | 11  |
| Q9JHU4 | Cytoplasmic dynein 1 heavy chain 1 (Cytoplasmic dynein heavy chain 1) (Dynein heavy chain, cytosolic)                                         | Dync1h1 (Dhc1) (Dnch1) (Dnchc1) (Dyhc) | 822 | 395 | 157 | 123 |
| Q7TMK6 | Protein Hook homolog 2                                                                                                                        | Hook2                                  | 33  | 36  | 26  | 20  |
| P62702 | 40S ribosomal protein S4, X isoform                                                                                                           | Rps4x (Rps4)                           | 402 | 304 | 30  | 23  |
| Q99MY8 | Probable histone-lysine N-methyltransferase ASH1L (EC 2.1.1.43) (Absent small and homeotic disks protein 1 homolog) (ASH1-like protein)       | Ash1l                                  | 19  | 31  | 46  | 35  |
| P16627 | Heat shock 70 kDa protein 1L (Heat shock 70 kDa protein 1-like) (Heat shock 70 kDa-like protein 1) (Spermatid-specific heat shock protein 70) | Hspa1l (Hsc70t)                        | 319 | 238 | 33  | 25  |
| Q02956 | Protein kinase C zeta type (EC 2.7.11.13) (nPKC-zeta)                                                                                         | Prkcz (PkcZ)                           | 29  | 15  | 8   | 6   |
| P62264 | 40S ribosomal protein S14                                                                                                                     | Rps14                                  | 163 | 166 | 15  | 11  |
| Q61696 | Heat shock 70 kDa protein 1A (Heat shock 70 kDa protein 3) (HSP70.3) (Hsp68)                                                                  | Hspa1a (Hsp70-3) (Hsp70A1)             | 266 | 236 | 33  | 24  |
| P14148 | 60S ribosomal protein L7                                                                                                                      | Rpl7                                   | 145 | 52  | 14  | 10  |
| P14869 | 60S acidic ribosomal protein P0 (L10E)                                                                                                        | Rplp0 (Arbp)                           | 115 | 334 | 28  | 20  |
| P08551 | Neurofilament light polypeptide (NF-L) (Neurofilament triplet L protein) (68 kDa neurofilament protein)                                       | Nefl (Nf68) (Nfl)                      | 51  | 36  | 17  | 12  |



|        |                                                                                                                                                                                                                       |                                |      |      |     |     |
|--------|-----------------------------------------------------------------------------------------------------------------------------------------------------------------------------------------------------------------------|--------------------------------|------|------|-----|-----|
| P51410 | 60S ribosomal protein L9                                                                                                                                                                                              | Rpl9                           | 187  | 212  | 17  | 12  |
| Q9CWF2 | Tubulin beta-2B chain                                                                                                                                                                                                 | Tubb2b                         | 1435 | 825  | 86  | 59  |
| P99024 | Tubulin beta-5 chain                                                                                                                                                                                                  | Tubb5                          | 1377 | 976  | 88  | 60  |
| Q8C9S8 | Cysteine protease ATG4A (EC 3.4.22.-) (Autophagy-related protein 4 homolog A) (Autophagin-2) (Autophagy-related cysteine endopeptidase 2) (AUT-like 2 cysteine endopeptidase)                                         | Atg4a (Apg4a) (Autl2)          | 26   | 21   | 6   | 4   |
| P43275 | Histone H1.1 (H1 VAR.3) (H1a)                                                                                                                                                                                         | Hist1h1a (H1f1)                | 28   | 90   | 9   | 6   |
| Q62168 | Keratin, type I cuticular Ha2 (Hair keratin, type I Ha2) (Keratin-32) (K32)                                                                                                                                           | Krt32 (Hka2) (Krt1-2) (Krtha2) | 39   | 36   | 9   | 6   |
| Q8K4L3 | Supervillin (Archvillin) (p205/p250)                                                                                                                                                                                  | Svil                           | 25   | 22   | 18  | 12  |
| P68033 | Actin, alpha cardiac muscle 1 (Alpha-cardiac actin)                                                                                                                                                                   | Actc1 (Actc)                   | 3948 | 2726 | 234 | 155 |
| P68372 | Tubulin beta-2C chain                                                                                                                                                                                                 | Tubb2c                         | 1300 | 891  | 78  | 51  |
| Q8CG48 | Structural maintenance of chromosomes protein 2 (Chromosome-associated protein E) (XCAP-E homolog) (FGF-inducible protein 16)                                                                                         | Smc2 (Cape) (Fin16) (Smc2l1)   | 32   | 36   | 41  | 26  |
| Q7TMM9 | Tubulin beta-2A chain                                                                                                                                                                                                 | Tubb2a (Tubb2)                 | 1422 | 775  | 83  | 52  |
| Q61879 | Myosin-10 (Myosin heavy chain 10) (Myosin heavy chain, non-muscle IIb) (Non-muscle myosin heavy chain IIb) (NMMHC II-b) (NMMHC-IIB) (Cellular myosin heavy chain, type B) (Non-muscle myosin heavy chain-B) (NMMHC-B) | Myh10                          | 122  | 101  | 65  | 40  |
| P26040 | Ezrin (p81) (Cytovillin) (Villin-2)                                                                                                                                                                                   | Ezr (Vil2)                     | 127  | 106  | 27  | 16  |
| P41105 | 60S ribosomal protein L28                                                                                                                                                                                             | Rpl28                          | 49   | 41   | 19  | 11  |
| Q9CZX8 | 40S ribosomal protein S19                                                                                                                                                                                             | Rps19                          | 206  | 146  | 19  | 11  |
| P47963 | 60S ribosomal protein L13 (A52)                                                                                                                                                                                       | Rpl13                          | 744  | 379  | 47  | 27  |
| P47757 | F-actin-capping protein subunit beta (CapZ beta)                                                                                                                                                                      | Capzb (Cappb1)                 | 107  | 68   | 7   | 4   |
| P26043 | Radixin (ESP10)                                                                                                                                                                                                       | Rdx                            | 127  | 106  | 23  | 13  |

|             |        |                                                                                                                                                                                                                                     |                                |     |     |     |     |
|-------------|--------|-------------------------------------------------------------------------------------------------------------------------------------------------------------------------------------------------------------------------------------|--------------------------------|-----|-----|-----|-----|
|             | P97461 | 40S ribosomal protein S5                                                                                                                                                                                                            | Rps5                           | 89  | 33  | 32  | 18  |
|             | Q8BYH8 | Chromodomain-helicase-DNA-binding protein 9 (CHD-9) (EC 3.6.1.-) (ATP-dependent helicase CHD9) (Peroxisomal proliferator-activated receptor A-interacting complex 320 kDa protein) (PPAR-alpha-interacting complex protein 320 kDa) | Chd9 (Kiaa0308) (Pric320)      | 39  | 27  | 49  | 27  |
|             | Q9D6F9 | Tubulin beta-4 chain                                                                                                                                                                                                                | Tubb4                          | 888 | 493 | 58  | 31  |
|             | P11103 | Poly [ADP-ribose] polymerase 1 (PARP-1) (EC 2.4.2.30) (ADPRT) (NAD(+) ADP-ribosyltransferase 1) (Poly[ADP-ribose] synthetase 1) (msPARP)                                                                                            | Parp1 (Adprp) (Adprt) (Adprt1) | 21  | 26  | 17  | 9   |
|             | Q922F4 | Tubulin beta-6 chain                                                                                                                                                                                                                | Tubb6                          | 583 | 382 | 40  | 21  |
|             | P97351 | 40S ribosomal protein S3a                                                                                                                                                                                                           | Rps3a                          | 899 | 392 | 50  | 26  |
|             | Q9ERD7 | Tubulin beta-3 chain                                                                                                                                                                                                                | Tubb3                          | 780 | 383 | 52  | 27  |
| translation | P57776 | Elongation factor 1-delta (EF-1-delta)                                                                                                                                                                                              | Eef1d                          | 109 | 35  | 3   | 5   |
|             | P35980 | 60S ribosomal protein L18                                                                                                                                                                                                           | Rpl18                          | 32  | 22  | 51  | 85  |
|             | Q6ZWX6 | Eukaryotic translation initiation factor 2 subunit 1 (Eukaryotic translation initiation factor 2 subunit alpha) (eIF-2-alpha) (EIF-2alpha) (EIF-2A)                                                                                 | Eif2s1 (Eif2a)                 | 27  | 177 | 7   | 11  |
|             | P62082 | 40S ribosomal protein S7                                                                                                                                                                                                            | Rps7                           | 104 | 126 | 9   | 14  |
|             | O55142 | 60S ribosomal protein L35a                                                                                                                                                                                                          | Rpl35a                         | 24  | 50  | 4   | 6   |
|             | O70251 | Elongation factor 1-beta (EF-1-beta)                                                                                                                                                                                                | Eef1b (Eef1b2)                 | 39  | 102 | 7   | 10  |
|             | P17047 | Lysosome-associated membrane glycoprotein 2 (LAMP-2) (Lysosomal membrane glycoprotein type B) (LGP-B) (CD107 antigen-like family member B) (CD antigen CD107b)                                                                      | Lamp2 (Lamp-2)                 | 26  | 29  | 8   | 11  |
|             | P28271 | Cytoplasmic aconitate hydratase (Aconitase) (EC 4.2.1.3) (Citrate hydro-lyase) (Iron-responsive element-binding protein 1) (IRE-BP 1) (Iron regulatory protein 1) (IRP1)                                                            | Aco1 (Ireb1) (Irebp)           | 77  | 122 | 147 | 184 |

|        |                                                                                                                                                                                                                                       |                                    |      |      |     |     |
|--------|---------------------------------------------------------------------------------------------------------------------------------------------------------------------------------------------------------------------------------------|------------------------------------|------|------|-----|-----|
| Q811J3 | Iron-responsive element-binding protein 2 (IRE BP 2) (Iron regulatory protein 2) (IRP2)                                                                                                                                               | Ireb2 (Irp2)                       | 69   | 119  | 142 | 176 |
| Q8BU30 | Isoleucyl-tRNA synthetase, cytoplasmic (EC 6.1.1.5) (Isoleucine--tRNA ligase) (IleRS) (IRS)                                                                                                                                           | Iars                               | 85   | 46   | 30  | 37  |
| Q8BGD9 | Eukaryotic translation initiation factor 4B (eIF-4B)                                                                                                                                                                                  | Eif4b                              | 238  | 306  | 13  | 16  |
| O08810 | 116 kDa U5 small nuclear ribonucleoprotein component (U5 snRNP-specific protein, 116 kDa) (U5-116 kDa) (Elongation factor Tu GTP-binding domain-containing protein 2)                                                                 | Eftud2 (Snrp116)                   | 80   | 68   | 21  | 25  |
| Q8C3X4 | GTP-binding protein GUF1 homolog                                                                                                                                                                                                      | Guf1                               | 311  | 506  | 412 | 483 |
| P62270 | 40S ribosomal protein S18 (Ke-3) (Ke3)                                                                                                                                                                                                | Rps18                              | 210  | 209  | 15  | 17  |
| P62908 | 40S ribosomal protein S3                                                                                                                                                                                                              | Rps3                               | 778  | 762  | 39  | 44  |
| P19253 | 60S ribosomal protein L13a (Transplantation antigen P198) (Tum-P198 antigen)                                                                                                                                                          | Rpl13a (P198) (Tstap198-7)         | 27   | 65   | 9   | 10  |
| P62631 | Elongation factor 1-alpha 2 (EF-1-alpha-2) (Elongation factor 1 A-2) (eEF1A-2) (Statin S1)                                                                                                                                            | Eef1a2 (Eef1a1) (Stn)              | 1275 | 1549 | 258 | 285 |
| Q9D8N0 | Elongation factor 1-gamma (EF-1-gamma) (eEF-1B gamma)                                                                                                                                                                                 | Eef1g                              | 31   | 85   | 11  | 12  |
| Q99KK9 | Probable histidyl-tRNA synthetase, mitochondrial (EC 6.1.1.21) (Histidine--tRNA ligase) (HisRS) (Histidine--tRNA ligase-like)                                                                                                         | Hars2 (Harsl)                      | 20   | 41   | 22  | 24  |
| P10126 | Elongation factor 1-alpha 1 (EF-1-alpha-1) (Elongation factor 1 A-1) (eEF1A-1) (Elongation factor Tu) (EF-Tu)                                                                                                                         | Eef1a1 (Eef1a)                     | 2004 | 2344 | 305 | 330 |
| Q9Z104 | SWI/SNF-related matrix-associated actin-dependent regulator of chromatin subfamily E member 1-related (SMARCE1-related protein) (HMG box-containing protein 20B) (Structural DNA-binding protein BRAF35) (BRCA2-associated factor 35) | Hmg20b (Braf35) (Hmgx2) (Smarce1r) | 30   | 20   | 14  | 15  |

|        |                                                                                                                                                                                             |                               |      |      |     |     |
|--------|---------------------------------------------------------------------------------------------------------------------------------------------------------------------------------------------|-------------------------------|------|------|-----|-----|
| P62281 | 40S ribosomal protein S11                                                                                                                                                                   | Rps11                         | 166  | 132  | 27  | 28  |
| P58252 | Elongation factor 2 (EF-2)                                                                                                                                                                  | Eef2                          | 1630 | 1718 | 128 | 126 |
| P23116 | Eukaryotic translation initiation factor 3 subunit A (eIF3a) (Eukaryotic translation initiation factor 3 subunit 10) (eIF-3-theta) (eIF3 p167) (eIF3 p180) (eIF3 p185) (p162) (Centrosomin) | Eif3a (Csma) (Eif3) (Eif3s10) | 199  | 166  | 58  | 56  |
| Q8BGQ7 | Alanyl-tRNA synthetase, cytoplasmic (EC 6.1.1.7) (Alanine--tRNA ligase) (AlaRS)                                                                                                             | Aars                          | 179  | 216  | 23  | 22  |
| Q8R1B4 | Eukaryotic translation initiation factor 3 subunit C (eIF3c) (Eukaryotic translation initiation factor 3 subunit 8) (eIF3 p110)                                                             | Eif3c (Eif3s8)                | 34   | 63   | 22  | 21  |
| Q9CPR4 | 60S ribosomal protein L17                                                                                                                                                                   | Rpl17                         | 187  | 135  | 15  | 14  |
| Q8CGC7 | Bifunctional aminoacyl-tRNA synthetase [Includes: Glutamyl-tRNA synthetase (EC 6.1.1.17) (Glutamate--tRNA ligase); Prolyl-tRNA synthetase (EC 6.1.1.15) (Proline--tRNA ligase)]             | Eprs (Qprs)                   | 130  | 102  | 32  | 29  |
| Q9Z1Q9 | Valyl-tRNA synthetase (EC 6.1.1.9) (Valine--tRNA ligase) (ValRS) (Protein G7a)                                                                                                              | Vars (Bat6) (G7a) (Vars2)     | 380  | 302  | 37  | 32  |
| P67984 | 60S ribosomal protein L22 (Heparin-binding protein HBp15)                                                                                                                                   | Rpl22                         | 59   | 48   | 7   | 6   |
| P35979 | 60S ribosomal protein L12                                                                                                                                                                   | Rpl12                         | 208  | 389  | 14  | 12  |
| Q9CZM2 | 60S ribosomal protein L15                                                                                                                                                                   | Rpl15                         | 225  | 107  | 21  | 18  |
| Q6ZWN5 | 40S ribosomal protein S9                                                                                                                                                                    | Rps9                          | 459  | 248  | 47  | 40  |
| P14131 | 40S ribosomal protein S16                                                                                                                                                                   | Rps16                         | 160  | 126  | 19  | 16  |
| P14206 | 40S ribosomal protein SA (Laminin receptor 1) (p40) (34/67 kDa laminin receptor) (37 kDa oncofetal antigen) (OFA/iLRP)                                                                      | Rpsa (Lamr1) (P40-8)          | 131  | 112  | 11  | 9   |
| P12970 | 60S ribosomal protein L7a (Surfeit locus protein 3)                                                                                                                                         | Rpl7a (Surf-3) (Surf3)        | 111  | 31   | 15  | 12  |
| Q8BP67 | 60S ribosomal protein L24                                                                                                                                                                   | Rpl24                         | 354  | 214  | 24  | 19  |
| P62754 | 40S ribosomal protein S6 (Phosphoprotein NP33)                                                                                                                                              | Rps6                          | 127  | 283  | 19  | 15  |
| Q9QWL7 | Keratin, type I cytoskeletal 17 (Cytokeratin-17) (CK-17) (Keratin-17) (K17)                                                                                                                 | Krt17 (Krt1-17)               | 38   | 46   | 14  | 11  |

|        |                                                                                                             |                                                   |     |     |    |    |
|--------|-------------------------------------------------------------------------------------------------------------|---------------------------------------------------|-----|-----|----|----|
| P62702 | 40S ribosomal protein S4, X isoform                                                                         | Rps4x (Rps4)                                      | 402 | 304 | 30 | 23 |
| P62751 | 60S ribosomal protein L23a                                                                                  | Rpl23a                                            | 75  | 49  | 16 | 12 |
| P58681 | Toll-like receptor 7                                                                                        | Tlr7                                              | 27  | 33  | 23 | 17 |
| P62264 | 40S ribosomal protein S14                                                                                   | Rps14                                             | 163 | 166 | 15 | 11 |
| P25444 | 40S ribosomal protein S2 (S4) (LLRep3 protein)                                                              | Rps2 (Llrep3) (Rps4)                              | 217 | 50  | 26 | 19 |
| P62991 | Ubiquitin                                                                                                   | Rps27a (Uba80) (Ubcep1); Uba52 (Ubcep2); Ubb; Ubc | 61  | 54  | 11 | 8  |
| Q9CR57 | 60S ribosomal protein L14                                                                                   | Rpl14                                             | 508 | 391 | 33 | 24 |
| P27659 | 60S ribosomal protein L3 (J1 protein)                                                                       | Rpl3                                              | 192 | 75  | 25 | 18 |
| P14148 | 60S ribosomal protein L7                                                                                    | Rpl7                                              | 145 | 52  | 14 | 10 |
| P14869 | 60S acidic ribosomal protein P0 (L10E)                                                                      | Rplp0 (Arbp)                                      | 115 | 334 | 28 | 20 |
| P51410 | 60S ribosomal protein L9                                                                                    | Rpl9                                              | 187 | 212 | 17 | 12 |
| Q8BMJ2 | Leucyl-tRNA synthetase, cytoplasmic (EC 6.1.1.4) (Leucine--tRNA ligase) (LeuRS)                             | Lars                                              | 52  | 45  | 47 | 33 |
| Q91YJ5 | Translation initiation factor IF-2, mitochondrial (IF-2Mt) (IF2(mt)) (IF-2(Mt))                             | Mtif2                                             | 29  | 23  | 13 | 9  |
| Q9CXW4 | 60S ribosomal protein L11                                                                                   | Rpl11                                             | 72  | 79  | 11 | 7  |
| P62717 | 60S ribosomal protein L18a                                                                                  | Rpl18a                                            | 242 | 62  | 21 | 13 |
| P84099 | 60S ribosomal protein L19                                                                                   | Rpl19                                             | 39  | 47  | 13 | 8  |
| P62301 | 40S ribosomal protein S13                                                                                   | Rps13                                             | 77  | 100 | 23 | 14 |
| Q9D1R9 | 60S ribosomal protein L34                                                                                   | Rpl34                                             | 34  | 32  | 10 | 6  |
| Q6NZJ6 | Eukaryotic translation initiation factor 4 gamma 1 (eIF-4-gamma 1) (eIF-4G 1) (eIF-4G1)                     | Eif4g1                                            | 47  | 113 | 30 | 18 |
| P10630 | Eukaryotic initiation factor 4A-II (eIF-4A-II) (eIF4A-II) (EC 3.6.1.-) (ATP-dependent RNA helicase eIF4A-2) | Eif4a2 (Ddx2b)                                    | 194 | 78  | 17 | 10 |
| P62900 | 60S ribosomal protein L31                                                                                   | Rpl31                                             | 124 | 62  | 12 | 7  |
| P41105 | 60S ribosomal protein L28                                                                                   | Rpl28                                             | 49  | 41  | 19 | 11 |
| Q9CZX8 | 40S ribosomal protein S19                                                                                   | Rps19                                             | 206 | 146 | 19 | 11 |
| P47963 | 60S ribosomal protein L13 (A52)                                                                             | Rpl13                                             | 744 | 379 | 47 | 27 |

|                 |        |                                                                                                                                                                                                                                          |                                   |     |     |    |    |
|-----------------|--------|------------------------------------------------------------------------------------------------------------------------------------------------------------------------------------------------------------------------------------------|-----------------------------------|-----|-----|----|----|
|                 | P97461 | 40S ribosomal protein S5                                                                                                                                                                                                                 | Rps5                              | 89  | 33  | 32 | 18 |
|                 | P63073 | Eukaryotic translation initiation factor 4E (eIF-4E) (eIF4E) (mRNA cap-binding protein) (eIF-4F 25 kDa subunit)                                                                                                                          | Eif4e                             | 110 | 25  | 9  | 5  |
|                 | P97351 | 40S ribosomal protein S3a                                                                                                                                                                                                                | Rps3a                             | 899 | 392 | 50 | 26 |
| gene expression | P97311 | DNA replication licensing factor MCM6 (Mis5 homolog)                                                                                                                                                                                     | Mcm6 (Mcmd6) (Mis5)               | 110 | 395 | 20 | 38 |
|                 | P62962 | Profilin-1 (Profilin I)                                                                                                                                                                                                                  | Pfn1                              | 30  | 93  | 4  | 7  |
|                 | P57776 | Elongation factor 1-delta (EF-1-delta)                                                                                                                                                                                                   | Eef1d                             | 109 | 35  | 3  | 5  |
|                 | P62960 | Nuclease-sensitive element-binding protein 1 (Y-box-binding protein 1) (Y-box transcription factor) (YB-1) (CCAAT-binding transcription factor I subunit A) (CBF-A) (Enhancer factor I subunit A) (EFI-A) (DNA-binding protein B) (DBPB) | Ybx1 (Msy-1) (Msy1) (Nsep1) (Yb1) | 56  | 126 | 6  | 10 |
|                 | P35980 | 60S ribosomal protein L18                                                                                                                                                                                                                | Rpl18                             | 32  | 22  | 51 | 85 |
|                 | Q6ZWX6 | Eukaryotic translation initiation factor 2 subunit 1 (Eukaryotic translation initiation factor 2 subunit alpha) (eIF-2-alpha) (EIF-2alpha) (EIF-2A)                                                                                      | Eif2s1 (Eif2a)                    | 27  | 177 | 7  | 11 |
|                 | Q61990 | Poly(rC)-binding protein 2 (Alpha-CP2) (Putative heterogeneous nuclear ribonucleoprotein X) (hnRNP X) (CTBP) (CBP)                                                                                                                       | Pcbp2 (Cbp) (HnrnpX) (Hnrpx)      | 29  | 194 | 7  | 11 |
|                 | P62082 | 40S ribosomal protein S7                                                                                                                                                                                                                 | Rps7                              | 104 | 126 | 9  | 14 |
|                 | P63158 | High mobility group protein B1 (High mobility group protein 1) (HMG-1)                                                                                                                                                                   | Hmgb1 (Hmg-1) (Hmg1)              | 153 | 405 | 25 | 38 |
|                 | Q8K386 | Ras-related protein Rab-15                                                                                                                                                                                                               | Rab15                             | 44  | 74  | 4  | 6  |
|                 | O55142 | 60S ribosomal protein L35a                                                                                                                                                                                                               | Rpl35a                            | 24  | 50  | 4  | 6  |
|                 | P60335 | Poly(rC)-binding protein 1 (Alpha-CP1) (hnRNP-E1)                                                                                                                                                                                        | Pcbp1                             | 56  | 350 | 9  | 13 |
|                 | O70251 | Elongation factor 1-beta (EF-1-beta)                                                                                                                                                                                                     | Eef1b (Eef1b2)                    | 39  | 102 | 7  | 10 |

|        |                                                                                                                                                                                                                                |                                  |     |     |     |     |
|--------|--------------------------------------------------------------------------------------------------------------------------------------------------------------------------------------------------------------------------------|----------------------------------|-----|-----|-----|-----|
| P12813 | Nuclear receptor subfamily 4 group A member 1 (Orphan nuclear receptor HMR) (Nuclear hormone receptor NUR/77) (N10 nuclear protein)                                                                                            | Nr4a1 (Gfrp) (Hmr) (N10) (Nur77) | 61  | 31  | 7   | 10  |
| P68510 | 14-3-3 protein eta                                                                                                                                                                                                             | Ywhah                            | 707 | 962 | 58  | 80  |
| P17047 | Lysosome-associated membrane glycoprotein 2 (LAMP-2) (Lysosomal membrane glycoprotein type B) (LGP-B) (CD107 antigen-like family member B) (CD antigen CD107b)                                                                 | Lamp2 (Lamp-2)                   | 26  | 29  | 8   | 11  |
| P70338 | Zinc finger protein Gfi-1 (Growth factor independent protein 1)                                                                                                                                                                | Gfi1 (Gfi-1)                     | 45  | 39  | 17  | 23  |
| Q61789 | Laminin subunit alpha-3 (Nicein subunit alpha)                                                                                                                                                                                 | Lama3                            | 26  | 26  | 37  | 50  |
| Q5SXJ3 | Fanconi anemia group J protein homolog (Protein FACJ) (EC 3.6.1.-) (ATP-dependent RNA helicase BRIP1) (BRCA1-interacting protein C-terminal helicase 1) (BRCA1-interacting protein 1) (BRCA1-associated C-terminal helicase 1) | Brip1 (Bach1) (Fancj)            | 25  | 18  | 13  | 17  |
| Q9Z277 | Bromodomain adjacent to zinc finger domain protein 1B (Williams-Beuren syndrome chromosomal region 9 protein homolog) (WBRS9)                                                                                                  | Baz1b (Wbscr9)                   | 43  | 17  | 26  | 34  |
| Q923B1 | Lariat debranching enzyme (EC 3.1.-.-)                                                                                                                                                                                         | Dbr1                             | 28  | 29  | 15  | 19  |
| Q62093 | Splicing factor, arginine/serine-rich 2 (Splicing factor SC35) (SC-35) (Splicing component, 35 kDa) (Protein PR264) (Putative myelin regulatory factor 1) (MRF-1)                                                              | Sfrs2 (Pr264) (Sfrs10)           | 184 | 117 | 15  | 19  |
| P28271 | Cytoplasmic aconitate hydratase (Aconitase) (EC 4.2.1.3) (Citrate hydro-lyase) (Iron-responsive element-binding protein 1) (IRE-BP 1) (Iron regulatory protein 1) (IRP1)                                                       | Aco1 (Ireb1) (Irebp)             | 77  | 122 | 147 | 184 |
| P61028 | Ras-related protein Rab-8B                                                                                                                                                                                                     | Rab8b                            | 17  | 59  | 4   | 5   |

|        |                                                                                                                                                                       |                       |     |     |     |     |
|--------|-----------------------------------------------------------------------------------------------------------------------------------------------------------------------|-----------------------|-----|-----|-----|-----|
| Q811J3 | Iron-responsive element-binding protein 2 (IRE BP 2) (Iron regulatory protein 2) (IRP2)                                                                               | Ireb2 (Irp2)          | 69  | 119 | 142 | 176 |
| Q8BU30 | Isoleucyl-tRNA synthetase, cytoplasmic (EC 6.1.1.5) (Isoleucine--tRNA ligase) (IleRS) (IRS)                                                                           | Iars                  | 85  | 46  | 30  | 37  |
| Q8BGD9 | Eukaryotic translation initiation factor 4B (eIF-4B)                                                                                                                  | Eif4b                 | 238 | 306 | 13  | 16  |
| Q8VII8 | Mineralocorticoid receptor (MR) (Nuclear receptor subfamily 3 group C member 2)                                                                                       | Nr3c2 (Mlr)           | 28  | 22  | 18  | 22  |
| O35618 | Protein Mdm4 (p53-binding protein Mdm4) (Mdm2-like p53-binding protein) (Protein Mdmx) (Double minute 4 protein)                                                      | Mdm4 (Mdmx)           | 17  | 29  | 5   | 6   |
| Q6PDM2 | Splicing factor, arginine/serine-rich 1 (ASF/SF2)                                                                                                                     | Sfrs1                 | 24  | 91  | 5   | 6   |
| Q60848 | Lymphocyte-specific helicase (EC 3.6.1.-) (Proliferation associated SNF2-like protein)                                                                                | Hells (Lsh) (Pasg)    | 37  | 35  | 10  | 12  |
| O08810 | 116 kDa U5 small nuclear ribonucleoprotein component (U5 snRNP-specific protein, 116 kDa) (U5-116 kDa) (Elongation factor Tu GTP-binding domain-containing protein 2) | Eftud2 (Snrp116)      | 80  | 68  | 21  | 25  |
| P54103 | DnaJ homolog subfamily C member 2 (Zuotin-related factor 1) (Mouse Id associate 1) (MIDA1)                                                                            | Dnajc2 (Mida1) (Zrf1) | 23  | 27  | 11  | 13  |
| Q8C3X4 | GTP-binding protein GUF1 homolog                                                                                                                                      | Guf1                  | 311 | 506 | 412 | 483 |
| Q61122 | NGFI-A-binding protein 1 (EGR-1-binding protein 1)                                                                                                                    | Nab1                  | 30  | 25  | 6   | 7   |
| P49718 | DNA replication licensing factor MCM5 (CDC46 homolog) (P1-CDC46)                                                                                                      | Mcm5 (Cdc46) (Mcmd5)  | 40  | 20  | 18  | 21  |
| P48754 | Breast cancer type 1 susceptibility protein homolog                                                                                                                   | Brca1                 | 28  | 25  | 26  | 30  |
| Q9JKP5 | Muscleblind-like protein 1 (Triplet-expansion RNA-binding protein)                                                                                                    | Mbnl1 (Exp) (Mbnl)    | 45  | 63  | 244 | 281 |



|        |                                                                                                                                                                                                                                                                                                                    |                                   |      |      |     |     |
|--------|--------------------------------------------------------------------------------------------------------------------------------------------------------------------------------------------------------------------------------------------------------------------------------------------------------------------|-----------------------------------|------|------|-----|-----|
| Q9QWY8 | 130 kDa phosphatidylinositol 4,5-biphosphate-dependent ARF1 GTPase-activating protein (PIP2-dependent ARF1 GAP) (ADP-ribosylation factor-directed GTPase-activating protein 1) (ARF GTPase-activating protein 1) (Development and differentiation-enhancing factor 1) (Differentiation-enhancing factor 1) (DEF-1) | Ddef1 (Asap1) (Kiaa1249) (Shag1)  | 26   | 23   | 14  | 16  |
| P62270 | 40S ribosomal protein S18 (Ke-3) (Ke3)                                                                                                                                                                                                                                                                             | Rps18                             | 210  | 209  | 15  | 17  |
| P55200 | Histone-lysine N-methyltransferase HRX (EC 2.1.1.43) (Zinc finger protein HRX) (ALL-1)                                                                                                                                                                                                                             | Mll (All1) (Hrx) (Mll1)           | 67   | 26   | 39  | 44  |
| P62908 | 40S ribosomal protein S3                                                                                                                                                                                                                                                                                           | Rps3                              | 778  | 762  | 39  | 44  |
| Q921M3 | Splicing factor 3B subunit 3 (Spliceosome-associated protein 130) (SAP 130) (Pre-mRNA splicing factor SF3b 130 kDa subunit) (SF3b130)                                                                                                                                                                              | Sf3b3 (Kiaa0017)                  | 16   | 34   | 24  | 27  |
| Q9WUF3 | CASP8-associated protein 2 (FLICE-associated huge protein)                                                                                                                                                                                                                                                         | Casp8ap2 (Flash)                  | 28   | 16   | 26  | 29  |
| P41230 | Histone demethylase JARID1C (EC 1.14.11.-) (Jumonji/ARID domain-containing protein 1C) (Protein SmcX) (Protein Xe169)                                                                                                                                                                                              | Jarid1c (Kiaa0234) (Smcx) (Xe169) | 34   | 32   | 26  | 29  |
| P19253 | 60S ribosomal protein L13a (Transplantation antigen P198) (Tum-P198 antigen)                                                                                                                                                                                                                                       | Rpl13a (P198) (Tstap198-7)        | 27   | 65   | 9   | 10  |
| P62631 | Elongation factor 1-alpha 2 (EF-1-alpha-2) (Elongation factor 1 A-2) (eEF1A-2) (Statin S1)                                                                                                                                                                                                                         | Eef1a2 (Eef1a1) (Stn)             | 1275 | 1549 | 258 | 285 |
| Q9D8N0 | Elongation factor 1-gamma (EF-1-gamma) (eEF-1B gamma)                                                                                                                                                                                                                                                              | Eef1g                             | 31   | 85   | 11  | 12  |
| P49717 | DNA replication licensing factor MCM4 (CDC21 homolog) (P1-CDC21)                                                                                                                                                                                                                                                   | Mcm4 (Cdc21) (Mcmd4)              | 29   | 18   | 11  | 12  |

|        |                                                                                                                                                                                                                                       |                                    |      |      |     |     |
|--------|---------------------------------------------------------------------------------------------------------------------------------------------------------------------------------------------------------------------------------------|------------------------------------|------|------|-----|-----|
| Q99KK9 | Probable histidyl-tRNA synthetase, mitochondrial (EC 6.1.1.21) (Histidine--tRNA ligase) (HisRS) (Histidine--tRNA ligase-like)                                                                                                         | Hars2 (Harsl)                      | 20   | 41   | 22  | 24  |
| Q6P9Z1 | SWI/SNF-related matrix-associated actin-dependent regulator of chromatin subfamily D member 3 (60 kDa BRG-1/Brm-associated factor subunit C) (BRG1-associated factor 60C) (mBAF60c)                                                   | Smarcd3 (Baf60c)                   | 29   | 19   | 46  | 50  |
| P70298 | Homeobox protein cut-like 2 (Cut-like 2) (Homeobox protein Cux-2)                                                                                                                                                                     | Cux2 (Cutl2)                       | 30   | 22   | 12  | 13  |
| P10126 | Elongation factor 1-alpha 1 (EF-1-alpha-1) (Elongation factor 1 A-1) (eEF1A-1) (Elongation factor Tu) (EF-Tu)                                                                                                                         | Eef1a1 (Eef1a)                     | 2004 | 2344 | 305 | 330 |
| Q9Z104 | SWI/SNF-related matrix-associated actin-dependent regulator of chromatin subfamily E member 1-related (SMARCE1-related protein) (HMG box-containing protein 20B) (Structural DNA-binding protein BRAF35) (BRCA2-associated factor 35) | Hmg20b (Braf35) (Hmgx2) (Smarce1r) | 30   | 20   | 14  | 15  |
| Q62504 | Msx2-interacting protein (SPEN homolog) (SMART/HDAC1-associated repressor protein)                                                                                                                                                    | Spen (Kiaa0929) (Mint) (Sharp)     | 27   | 18   | 72  | 75  |
| O35973 | Period circadian protein homolog 1 (Circadian clock protein PERIOD 1) (Circadian pacemaker protein Rigui) (mPER1)                                                                                                                     | Per1 (Per) (Rigui)                 | 29   | 21   | 27  | 28  |
| P62281 | 40S ribosomal protein S11                                                                                                                                                                                                             | Rps11                              | 166  | 132  | 27  | 28  |
| Q9JM05 | E3 SUMO-protein ligase PIAS4 (Protein inhibitor of activated STAT protein 4) (Protein inhibitor of activated STAT protein gamma) (PIAS-gamma) (PIASy)                                                                                 | Pias4 (Piasg)                      | 26   | 29   | 162 | 165 |
| Q3TXZ1 | Zinc finger protein 575                                                                                                                                                                                                               | Znf575 (Zfp575)                    | 30   | 25   | 5   | 5   |
| Q8VCZ3 | THAP domain-containing protein 7                                                                                                                                                                                                      | Thap7                              | 26   | 18   | 6   | 6   |

|        |                                                                                                                                                                                                              |                                        |      |      |     |     |
|--------|--------------------------------------------------------------------------------------------------------------------------------------------------------------------------------------------------------------|----------------------------------------|------|------|-----|-----|
| Q9R190 | Metastasis-associated protein MTA2 (Metastasis-associated 1-like 1)                                                                                                                                          | Mta2 (Mta111)                          | 27   | 26   | 9   | 9   |
| Q9DAI4 | Zinc finger and BTB domain-containing protein 43 (Zinc finger protein 297B)                                                                                                                                  | Zbtb43 (Kiaa0414) (Zfp297b) (Znf297b)  | 23   | 51   | 9   | 9   |
| P25206 | DNA replication licensing factor MCM3 (DNA polymerase alpha holoenzyme-associated protein P1) (P1-MCM3)                                                                                                      | Mcm3 (Mcmd) (Mcmd3)                    | 74   | 185  | 15  | 15  |
| P30681 | High mobility group protein B2 (High mobility group protein 2) (HMG-2)                                                                                                                                       | Hmgb2 (Hmg2)                           | 94   | 222  | 24  | 24  |
| Q80UK8 | Integrator complex subunit 2 (Int2)                                                                                                                                                                          | Ints2 (Kiaa1287)                       | 16   | 27   | 24  | 24  |
| P58252 | Elongation factor 2 (EF-2)                                                                                                                                                                                   | Eef2                                   | 1630 | 1718 | 128 | 126 |
| Q91YE5 | Bromodomain adjacent to zinc finger domain protein 2A (Transcription termination factor I-interacting protein 5) (TTF-I-interacting protein 5) (Tip5)                                                        | Baz2a (Tip5)                           | 36   | 15   | 56  | 55  |
| P23116 | Eukaryotic translation initiation factor 3 subunit A (eIF3a) (Eukaryotic translation initiation factor 3 subunit 10) (eIF-3-theta) (eIF3 p167) (eIF3 p180) (eIF3 p185) (p162) (Centrosomin)                  | Eif3a (Csma) (Eif3) (Eif3s10)          | 199  | 166  | 58  | 56  |
| Q8R4B8 | NACHT, LRR and PYD domains-containing protein 3 (Cold autoinflammatory syndrome 1 protein homolog) (Cryopyrin) (PYRIN-containing APAF1-like protein 1) (Mast cell maturation-associated-inducible protein 1) | Nlrp3 (Cias1) (Mmig1) (Nalp3) (Pypaf1) | 30   | 20   | 24  | 23  |
| Q8BGQ7 | Alanyl-tRNA synthetase, cytoplasmic (EC 6.1.1.7) (Alanine--tRNA ligase) (AlaRS)                                                                                                                              | Aars                                   | 179  | 216  | 23  | 22  |
| Q8R1B4 | Eukaryotic translation initiation factor 3 subunit C (eIF3c) (Eukaryotic translation initiation factor 3 subunit 8) (eIF3 p110)                                                                              | Eif3c (Eif3s8)                         | 34   | 63   | 22  | 21  |

|        |                                                                                                                                                                                 |                                   |     |     |    |    |
|--------|---------------------------------------------------------------------------------------------------------------------------------------------------------------------------------|-----------------------------------|-----|-----|----|----|
| Q6ZPK0 | PHD finger protein 21A (BRAF35-HDAC complex protein BHC80) (mBHC80) (BHC80a)                                                                                                    | Phf21a (Bhc80) (Kiaa1696) (Pfff1) | 28  | 37  | 20 | 19 |
| P03966 | N-myc proto-oncogene protein                                                                                                                                                    | Mycn (Nmyc) (Nmyc1)               | 65  | 46  | 18 | 17 |
| Q8BTI8 | Serine/arginine repetitive matrix protein 2                                                                                                                                     | Srrm2 (Kiaa0324)                  | 78  | 70  | 92 | 86 |
| Q9CPR4 | 60S ribosomal protein L17                                                                                                                                                       | Rpl17                             | 187 | 135 | 15 | 14 |
| Q8CGC7 | Bifunctional aminoacyl-tRNA synthetase [Includes: Glutamyl-tRNA synthetase (EC 6.1.1.17) (Glutamate--tRNA ligase); Prolyl-tRNA synthetase (EC 6.1.1.15) (Proline--tRNA ligase)] | Eprs (Qprs)                       | 130 | 102 | 32 | 29 |
| Q9QZH3 | Peptidyl-prolyl cis-trans isomerase E (PPIase E) (Rotamase E) (EC 5.2.1.8) (Cyclophilin E) (Cyclophilin-33)                                                                     | Ppie (Cyp33)                      | 28  | 35  | 10 | 9  |
| Q925Q8 | Dachshund homolog 2 (Dach2)                                                                                                                                                     | Dach2                             | 22  | 30  | 9  | 8  |
| Q8BG95 | Protein phosphatase 1 regulatory subunit 12B (Myosin phosphatase-targeting subunit 2)                                                                                           | Ppp1r12b (Mypt2)                  | 25  | 24  | 25 | 22 |
| Q9Z1Q9 | Valyl-tRNA synthetase (EC 6.1.1.9) (Valine--tRNA ligase) (ValRS) (Protein G7a)                                                                                                  | Vars (Bat6) (G7a) (Vars2)         | 380 | 302 | 37 | 32 |
| Q9D868 | Peptidyl-prolyl cis-trans isomerase H (PPIase H) (Rotamase H) (EC 5.2.1.8)                                                                                                      | Ppih                              | 55  | 31  | 7  | 6  |
| P67984 | 60S ribosomal protein L22 (Heparin-binding protein HBp15)                                                                                                                       | Rpl22                             | 59  | 48  | 7  | 6  |
| P35979 | 60S ribosomal protein L12                                                                                                                                                       | Rpl12                             | 208 | 389 | 14 | 12 |
| P97784 | Cryptochrome-1                                                                                                                                                                  | Cry1                              | 52  | 42  | 21 | 18 |
| Q9R194 | Cryptochrome-2                                                                                                                                                                  | Cry2 (Kiaa0658)                   | 52  | 42  | 21 | 18 |
| Q9CZM2 | 60S ribosomal protein L15                                                                                                                                                       | Rpl15                             | 225 | 107 | 21 | 18 |
| Q6ZWN5 | 40S ribosomal protein S9                                                                                                                                                        | Rps9                              | 459 | 248 | 47 | 40 |
| P14131 | 40S ribosomal protein S16                                                                                                                                                       | Rps16                             | 160 | 126 | 19 | 16 |

|        |                                                                                                                                                                        |                               |     |     |    |    |
|--------|------------------------------------------------------------------------------------------------------------------------------------------------------------------------|-------------------------------|-----|-----|----|----|
| Q99PP7 | E3 ubiquitin-protein ligase TRIM33 (EC 6.3.2.-) (Tripartite motif-containing protein 33) (Transcription intermediary factor 1-gamma) (TIF1-gamma) (Ectodermin homolog) | Trim33 (Kiaa1113)             | 33  | 25  | 12 | 10 |
| Q6DFV7 | Nuclear receptor coactivator 7                                                                                                                                         | Ncoa7                         | 25  | 16  | 11 | 9  |
| P14206 | 40S ribosomal protein SA (Laminin receptor 1) (p40) (34/67 kDa laminin receptor) (37 kDa oncofetal antigen) (OFA/iLRP)                                                 | Rpsa (Lamr1) (P40-8)          | 131 | 112 | 11 | 9  |
| Q6ZQ38 | Cullin-associated NEDD8-dissociated protein 1 (Cullin-associated and neddylation-dissociated protein 1) (p120 CAND1)                                                   | Cand1 (D10Erd516e) (Kiaa0829) | 221 | 246 | 33 | 27 |
| P42227 | Signal transducer and activator of transcription 3 (Acute-phase response factor)                                                                                       | Stat3 (Aprf)                  | 16  | 28  | 33 | 27 |
| Q569Z5 | Probable ATP-dependent RNA helicase DDX46 (EC 3.6.1.-) (DEAD box protein 46)                                                                                           | Ddx46 (Kiaa0801)              | 25  | 17  | 21 | 17 |
| P12970 | 60S ribosomal protein L7a (Surfeit locus protein 3)                                                                                                                    | Rpl7a (Surf-3) (Surf3)        | 111 | 31  | 15 | 12 |
| Q8BP67 | 60S ribosomal protein L24                                                                                                                                              | Rpl24                         | 354 | 214 | 24 | 19 |
| Q80UN9 | tRNA isopentenyltransferase, mitochondrial (IPTase) (EC 2.5.1.8) (Isopentenyl-diphosphate:tRNA isopentenyltransferase) (IPP transferase) (IPPT)                        | Trit1 (lpt)                   | 31  | 24  | 19 | 15 |
| P62754 | 40S ribosomal protein S6 (Phosphoprotein NP33)                                                                                                                         | Rps6                          | 127 | 283 | 19 | 15 |
| Q9QWL7 | Keratin, type I cytoskeletal 17 (Cytokeratin-17) (CK-17) (Keratin-17) (K17)                                                                                            | Krt17 (Krt1-17)               | 38  | 46  | 14 | 11 |
| Q6A078 | Centrosomal protein of 290 kDa (Cep290) (Nephrocystin-6)                                                                                                               | Cep290 (Kiaa0373) (Nphp6)     | 32  | 57  | 85 | 66 |
| P62702 | 40S ribosomal protein S4, X isoform                                                                                                                                    | Rps4x (Rps4)                  | 402 | 304 | 30 | 23 |
| Q569Z6 | Thyroid hormone receptor-associated protein 3 (Thyroid hormone receptor-associated protein complex 150 kDa component) (Trap150)                                        | Thrap3 (Trap150)              | 29  | 48  | 21 | 16 |

|        |                                                                                                                                         |                                                   |     |     |    |    |
|--------|-----------------------------------------------------------------------------------------------------------------------------------------|---------------------------------------------------|-----|-----|----|----|
| Q99MY8 | Probable histone-lysine N-methyltransferase ASH1L (EC 2.1.1.43) (Absent small and homeotic disks protein 1 homolog) (ASH1-like protein) | Ash1l                                             | 19  | 31  | 46 | 35 |
| P70670 | Nascent polypeptide-associated complex subunit alpha, muscle-specific form (Alpha-NAC, muscle-specific form)                            | Naca (Gm1878)                                     | 22  | 130 | 29 | 22 |
| P25233 | Necdin                                                                                                                                  | Ndn                                               | 30  | 23  | 16 | 12 |
| P62751 | 60S ribosomal protein L23a                                                                                                              | Rpl23a                                            | 75  | 49  | 16 | 12 |
| Q6P3Y5 | Zinc finger protein 280C (Suppressor of hairy wing homolog 3)                                                                           | Znf280c (Kiaa1584) (Suhw3) (Zfp280c)              | 87  | 142 | 43 | 32 |
| P58681 | Toll-like receptor 7                                                                                                                    | Tlr7                                              | 27  | 33  | 23 | 17 |
| P62264 | 40S ribosomal protein S14                                                                                                               | Rps14                                             | 163 | 166 | 15 | 11 |
| P25444 | 40S ribosomal protein S2 (S4) (LLRep3 protein)                                                                                          | Rps2 (Llrep3) (Rps4)                              | 217 | 50  | 26 | 19 |
| Q61656 | Probable ATP-dependent RNA helicase DDX5 (EC 3.6.1.-) (DEAD box protein 5) (RNA helicase p68) (DEAD box RNA helicase DEAD1) (mDEAD1)    | Ddx5 (Tnz2)                                       | 90  | 43  | 11 | 8  |
| P62991 | Ubiquitin                                                                                                                               | Rps27a (Uba80) (Ubcep1); Uba52 (Ubcep2); Ubb; Ubc | 61  | 54  | 11 | 8  |
| Q9CR57 | 60S ribosomal protein L14                                                                                                               | Rpl14                                             | 508 | 391 | 33 | 24 |
| P27659 | 60S ribosomal protein L3 (J1 protein)                                                                                                   | Rpl3                                              | 192 | 75  | 25 | 18 |
| P14148 | 60S ribosomal protein L7                                                                                                                | Rpl7                                              | 145 | 52  | 14 | 10 |
| Q03172 | Zinc finger protein 40 (Transcription factor alphaA-CRYBP1) (Alpha A-crystallin-binding protein I) (Alpha A-CRYBP1)                     | Hivep1 (Cryabp1) (Znf40)                          | 25  | 24  | 21 | 15 |
| P14869 | 60S acidic ribosomal protein P0 (L10E)                                                                                                  | Rplp0 (Arbp)                                      | 115 | 334 | 28 | 20 |
| P51410 | 60S ribosomal protein L9                                                                                                                | Rpl9                                              | 187 | 212 | 17 | 12 |

|        |                                                                                                             |                         |     |     |    |    |
|--------|-------------------------------------------------------------------------------------------------------------|-------------------------|-----|-----|----|----|
| Q8BMJ2 | Leucyl-tRNA synthetase, cytoplasmic (EC 6.1.1.4) (Leucine--tRNA ligase) (LeuRS)                             | Lars                    | 52  | 45  | 47 | 33 |
| Q91YJ5 | Translation initiation factor IF-2, mitochondrial (IF-2Mt) (IF2(mt)) (IF-2(Mt))                             | Mtif2                   | 29  | 23  | 13 | 9  |
| Q52KI8 | Serine/arginine repetitive matrix protein 1 (Plenty-of-prolines 101)                                        | Srrm1 (Pop101)          | 22  | 73  | 29 | 20 |
| Q99PV0 | Pre-mRNA-processing-splicing factor 8 (Splicing factor Prp8)                                                | Prpf8 (Prp8)            | 28  | 29  | 51 | 35 |
| Q6PHN9 | Ras-related protein Rab-35                                                                                  | Rab35                   | 17  | 59  | 3  | 2  |
| P61979 | Heterogeneous nuclear ribonucleoprotein K (hnRNP K)                                                         | Hnrnpk (Hnrpk)          | 225 | 46  | 18 | 12 |
| Q924W6 | Tripartite motif-containing protein 66 (Transcriptional intermediary factor 1 delta)                        | Trim66 (Tif1d)          | 28  | 18  | 23 | 15 |
| Q9CXW4 | 60S ribosomal protein L11                                                                                   | Rpl11                   | 72  | 79  | 11 | 7  |
| Q9QZ09 | Putative homeodomain transcription factor 1                                                                 | Phtf1 (Phtf)            | 29  | 24  | 8  | 5  |
| P62717 | 60S ribosomal protein L18a                                                                                  | Rpl18a                  | 242 | 62  | 21 | 13 |
| P84099 | 60S ribosomal protein L19                                                                                   | Rpl19                   | 39  | 47  | 13 | 8  |
| P62301 | 40S ribosomal protein S13                                                                                   | Rps13                   | 77  | 100 | 23 | 14 |
| O88291 | Zinc finger protein 326 (Zinc finger protein-associated with nuclear matrix of 75 kDa)                      | Znf326 (Zan75) (Zfp326) | 41  | 55  | 5  | 3  |
| Q9D1R9 | 60S ribosomal protein L34                                                                                   | Rpl34                   | 34  | 32  | 10 | 6  |
| Q6NZJ6 | Eukaryotic translation initiation factor 4 gamma 1 (eIF-4-gamma 1) (eIF-4G 1) (eIF-4G1)                     | Eif4g1                  | 47  | 113 | 30 | 18 |
| P10630 | Eukaryotic initiation factor 4A-II (eIF-4A-II) (eIF4A-II) (EC 3.6.1.-) (ATP-dependent RNA helicase eIF4A-2) | Eif4a2 (Ddx2b)          | 194 | 78  | 17 | 10 |
| P62900 | 60S ribosomal protein L31                                                                                   | Rpl31                   | 124 | 62  | 12 | 7  |
| P41105 | 60S ribosomal protein L28                                                                                   | Rpl28                   | 49  | 41  | 19 | 11 |
| Q9CZX8 | 40S ribosomal protein S19                                                                                   | Rps19                   | 206 | 146 | 19 | 11 |
| P47963 | 60S ribosomal protein L13 (A52)                                                                             | Rpl13                   | 744 | 379 | 47 | 27 |

|                                          |        |                                                                                                                                                                                                                                     |                             |     |      |    |     |
|------------------------------------------|--------|-------------------------------------------------------------------------------------------------------------------------------------------------------------------------------------------------------------------------------------|-----------------------------|-----|------|----|-----|
|                                          | P53762 | Aryl hydrocarbon receptor nuclear translocator (ARNT protein) (Dioxin receptor, nuclear translocator) (Hypoxia-inducible factor 1 beta) (HIF-1 beta)                                                                                | Arnt                        | 25  | 22   | 7  | 4   |
|                                          | Q9R1X4 | Protein timeless homolog (mTim)                                                                                                                                                                                                     | Timeless (Tim1) (Timeless1) | 22  | 25   | 16 | 9   |
|                                          | P97461 | 40S ribosomal protein S5                                                                                                                                                                                                            | Rps5                        | 89  | 33   | 32 | 18  |
|                                          | P63073 | Eukaryotic translation initiation factor 4E (eIF-4E) (eIF4E) (mRNA cap-binding protein) (eIF-4F 25 kDa subunit)                                                                                                                     | Eif4e                       | 110 | 25   | 9  | 5   |
|                                          | Q8BYH8 | Chromodomain-helicase-DNA-binding protein 9 (CHD-9) (EC 3.6.1.-) (ATP-dependent helicase CHD9) (Peroxisomal proliferator-activated receptor A-interacting complex 320 kDa protein) (PPAR-alpha-interacting complex protein 320 kDa) | Chd9 (Kiaa0308) (Pric320)   | 39  | 27   | 49 | 27  |
|                                          | O35664 | Interferon-alpha/beta receptor beta chain (Interferon alpha/beta receptor 2) (IFN-alpha-REC) (Type I interferon receptor) (IFN-R)                                                                                                   | Ifnar2                      | 37  | 21   | 11 | 6   |
|                                          | P97351 | 40S ribosomal protein S3a                                                                                                                                                                                                           | Rps3a                       | 899 | 392  | 50 | 26  |
| cytoskeleton organization and biogenesis | P04104 | Keratin, type II cytoskeletal 1 (Cytokeratin-1) (CK-1) (Keratin-1) (K1) (67 kDa cytokeratin) (Krt1 protein)                                                                                                                         | Krt1 (Krt2-1)               | 87  | 124  | 14 | 27  |
|                                          | Q7TSG3 | F-box only protein 5 (Early mitotic inhibitor 1)                                                                                                                                                                                    | Fbxo5 (Emi1)                | 15  | 27   | 5  | 9   |
|                                          | Q61414 | Keratin, type I cytoskeletal 15 (Cytokeratin-15) (CK-15) (Keratin-15) (K15)                                                                                                                                                         | Krt15 (Krt1-15)             | 37  | 46   | 4  | 7   |
|                                          | P62962 | Profilin-1 (Profilin I)                                                                                                                                                                                                             | Pfn1                        | 30  | 93   | 4  | 7   |
|                                          | P18760 | Cofilin-1 (Cofilin, non-muscle isoform)                                                                                                                                                                                             | Cfl1                        | 959 | 2552 | 70 | 122 |
|                                          | Q922U2 | Keratin, type II cytoskeletal 5 (Cytokeratin-5) (CK-5) (Keratin-5) (K5)                                                                                                                                                             | Krt5 (Krt2-5)               | 396 | 550  | 23 | 38  |
|                                          | Q80Y17 | Lethal(2) giant larvae protein homolog 1 (LLGL) (Mlgl) (Mgl-1)                                                                                                                                                                      | Llgl1 (Llglh)               | 30  | 29   | 7  | 11  |
|                                          | P63001 | Ras-related C3 botulinum toxin substrate 1 (p21-Rac1)                                                                                                                                                                               | Rac1                        | 31  | 99   | 7  | 11  |



|        |                                                                                                                                                                                         |                                 |      |      |     |     |
|--------|-----------------------------------------------------------------------------------------------------------------------------------------------------------------------------------------|---------------------------------|------|------|-----|-----|
| P07744 | Keratin, type II cytoskeletal 4 (Cytokeratin-4) (CK-4) (Keratin-4) (K4) (Cytoskeletal 57 kDa keratin)                                                                                   | Krt4 (Krt2-4)                   | 36   | 74   | 19  | 27  |
| Q8VHX6 | Filamin-C (Gamma-filamin) (Filamin-2) (FLN-C) (Actin-binding-like protein) (ABP-L) (ABP-280-like protein)                                                                               | FlnC (Abpl) (Fln2)              | 33   | 115  | 18  | 25  |
| P68510 | 14-3-3 protein eta                                                                                                                                                                      | Ywhah                           | 707  | 962  | 58  | 80  |
| P05214 | Tubulin alpha-3 chain (Tubulin alpha-3/alpha-7 chain) (Alpha-tubulin 3/7) (Alpha-tubulin isotype M-alpha-3/7)                                                                           | Tuba3a (Tuba3); Tuba3b (Tuba7)  | 1112 | 1288 | 61  | 84  |
| Q99M73 | Keratin, type II cuticular Hb4 (Type II hair keratin Hb4) (Keratin-84) (K84) (65 kDa type II keratin)                                                                                   | Krt84 (Krt2-16) (Krt84) (Krt84) | 36   | 74   | 14  | 19  |
| Q921C5 | Protein bicaudal D homolog 2 (Bic-D 2)                                                                                                                                                  | Bicd2 (Kiaa0699)                | 31   | 23   | 26  | 34  |
| Q61595 | Kinectin                                                                                                                                                                                | Ktn1                            | 15   | 50   | 43  | 56  |
| P47753 | F-actin-capping protein subunit alpha-1 (CapZ alpha-1)                                                                                                                                  | Capza1 (Cappa1)                 | 60   | 33   | 7   | 9   |
| P20152 | Vimentin                                                                                                                                                                                | Vim                             | 1749 | 2397 | 125 | 157 |
| P47754 | F-actin-capping protein subunit alpha-2 (CapZ alpha-2)                                                                                                                                  | Capza2 (Cappa2)                 | 60   | 33   | 5   | 6   |
| P05784 | Keratin, type I cytoskeletal 18 (Cytokeratin-18) (CK-18) (Keratin-18) (K18) (Cytokeratin endo B) (Keratin D)                                                                            | Krt18 (Kerd) (Krt1-18)          | 37   | 46   | 10  | 12  |
| P54227 | Stathmin (Phosphoprotein p19) (pp19) (Leukemia-associated phosphoprotein p18) (Oncoprotein 18) (Op18) (pp17) (Prosolin) (Metablastin) (Protein Pr22) (Leukemia-associated gene protein) | Stmn1 (Lag) (Lap18) (Pr22)      | 121  | 120  | 10  | 12  |
| Q60575 | Kinesin-like protein KIF1B                                                                                                                                                              | Kif1b                           | 45   | 95   | 30  | 36  |
| Q61771 | Kinesin-like protein KIF3B (Microtubule plus end-directed kinesin motor 3B)                                                                                                             | Kif3b                           | 30   | 51   | 16  | 19  |
| Q9WUM4 | Coronin-1C (Coronin-3)                                                                                                                                                                  | Coro1c                          | 42   | 28   | 18  | 21  |
| Q5SPW0 | Vacuolar protein sorting-associated protein 54 (Tumor antigen SLP-8p homolog)                                                                                                           | Vps54                           | 36   | 28   | 13  | 15  |

|        |                                                                                                                                     |                                       |     |     |     |     |
|--------|-------------------------------------------------------------------------------------------------------------------------------------|---------------------------------------|-----|-----|-----|-----|
| Q62418 | Drebrin-like protein (SH3 domain-containing protein 7) (Actin-binding protein 1)                                                    | Dbn1 (Abp1) (Sh3p7)                   | 24  | 39  | 7   | 8   |
| Q9Z2K1 | Keratin, type I cytoskeletal 16 (Cytokeratin-16) (CK-16) (Keratin-16) (K16)                                                         | Krt16 (Krt1-16)                       | 37  | 37  | 7   | 8   |
| P40124 | Adenylyl cyclase-associated protein 1 (CAP 1)                                                                                       | Cap1 (Cap)                            | 22  | 43  | 8   | 9   |
| P19001 | Keratin, type I cytoskeletal 19 (Cytokeratin-19) (CK-19) (Keratin-19) (K19)                                                         | Krt19 (Krt1-19)                       | 37  | 46  | 11  | 12  |
| Q9QUI0 | Transforming protein RhoA                                                                                                           | Rhoa (Arha) (Arha2)                   | 117 | 231 | 11  | 12  |
| P27546 | Microtubule-associated protein 4 (MAP-4)                                                                                            | Map4 (Mtap4)                          | 94  | 41  | 33  | 36  |
| P16546 | Spectrin alpha chain, brain (Spectrin, non-erythroid alpha chain) (Alpha-II spectrin) (Fodrin alpha chain)                          | Sptan1 (Spna2) (Spta2)                | 68  | 86  | 66  | 69  |
| P26039 | Talin-1                                                                                                                             | Tln1 (Tln)                            | 123 | 161 | 41  | 42  |
| Q8C0N1 | Kinesin-like protein KIF2B                                                                                                          | Kif2b                                 | 17  | 26  | 8   | 8   |
| Q61781 | Keratin, type I cytoskeletal 14 (Cytokeratin-14) (CK-14) (Keratin-14) (K14)                                                         | Krt14 (Krt1-14)                       | 38  | 37  | 10  | 10  |
| Q9CQ60 | 6-phosphogluconolactonase (6PGL) (EC 3.1.1.31)                                                                                      | Pgls                                  | 148 | 41  | 11  | 11  |
| Q62261 | Spectrin beta chain, brain 1 (Spectrin, non-erythroid beta chain 1) (Beta-II spectrin) (Fodrin beta chain) (Embryonic liver fodrin) | Sptbn1 (Elf) (Spnb-2) (Spnb2) (Sptb2) | 56  | 54  | 48  | 48  |
| Q9QYX7 | Protein piccolo (Aczonin) (Multidomain presynaptic cytomatrix protein) (Brain-derived HLMN protein)                                 | Pclo (Acz)                            | 101 | 117 | 114 | 114 |
| O08638 | Myosin-11 (Myosin heavy chain 11) (Myosin heavy chain, smooth muscle isoform) (SMMHC)                                               | Myh11                                 | 211 | 221 | 79  | 76  |
| Q9QXL1 | Kinesin-like protein KIF21B (Kinesin-like protein KIF6)                                                                             | Kif21b (Kif6)                         | 22  | 45  | 26  | 25  |
| Q61768 | Kinesin-1 heavy chain (Ubiquitous kinesin heavy chain) (UKHC) (Conventional kinesin heavy chain)                                    | Kif5b (Khcs) (Kns1)                   | 102 | 303 | 43  | 41  |

|        |                                                                                                                                                                                                                     |                     |     |     |     |     |
|--------|---------------------------------------------------------------------------------------------------------------------------------------------------------------------------------------------------------------------|---------------------|-----|-----|-----|-----|
| P08730 | Keratin, type I cytoskeletal 13 (Cytokeratin-13) (CK-13) (Keratin-13) (K13) (47 kDa cyokeratin)                                                                                                                     | Krt13 (Krt1-13)     | 37  | 46  | 13  | 12  |
| P03995 | Glial fibrillary acidic protein (GFAP)                                                                                                                                                                              | Gfap                | 63  | 90  | 22  | 20  |
| Q8VDD5 | Myosin-9 (Myosin heavy chain 9) (Myosin heavy chain, non-muscle IIa) (Non-muscle myosin heavy chain IIa) (NMMHC II-a) (NMMHC-IIA) (Cellular myosin heavy chain, type A) (Non-muscle myosin heavy chain-A) (NMMHC-A) | Myh9                | 780 | 839 | 127 | 115 |
| P02535 | Keratin, type I cytoskeletal 10 (Cytokeratin-10) (CK-10) (Keratin-10) (K10) (56 kDa cyokeratin) (Keratin, type I cytoskeletal 59 kDa)                                                                               | Krt10 (Krt1-10)     | 252 | 152 | 19  | 17  |
| Q922G7 | Tektin-2 (Testicular tektin) (Tektin-t)                                                                                                                                                                             | Tekt2               | 25  | 26  | 9   | 8   |
| Q99104 | Myosin-Va (Dilute myosin heavy chain, non-muscle)                                                                                                                                                                   | Myo5a (Dilute)      | 28  | 34  | 35  | 31  |
| P33173 | Kinesin-like protein KIF1A (Axonal transporter of synaptic vesicles)                                                                                                                                                | Kif1a (Atsv) (Kif1) | 45  | 108 | 25  | 22  |
| Q9R0P5 | Destrin (Actin-depolymerizing factor) (ADF) (Sid 23)                                                                                                                                                                | Dstn (Dsn) (Sid23)  | 61  | 81  | 8   | 7   |
| Q8VHE6 | Dynein heavy chain 5, axonemal (Axonemal beta dynein heavy chain 5) (Mdnah5) (Ciliary dynein heavy chain 5)                                                                                                         | Dnah5 (Dnahc5)      | 47  | 44  | 83  | 72  |
| P20357 | Microtubule-associated protein 2 (MAP-2)                                                                                                                                                                            | Map2 (Mtap2)        | 50  | 22  | 30  | 25  |
| Q91XQ0 | Dynein heavy chain 8, axonemal (Axonemal beta dynein heavy chain 8) (Ciliary dynein heavy chain 8)                                                                                                                  | Dnahc8              | 47  | 51  | 77  | 64  |
| Q6URW6 | Myosin-14 (Myosin heavy chain 14) (Myosin heavy chain, non-muscle IIc) (Non-muscle myosin heavy chain IIc) (NMHC II-C)                                                                                              | Myh14               | 60  | 48  | 53  | 44  |
| Q91ZU6 | Bullous pemphigoid antigen 1, isoforms 1/2/3/4 (BPA) (Hemidesmosomal plaque protein) (Dystonia musculorum protein) (Dystonin)                                                                                       | Dst (Bpag1)         | 78  | 38  | 126 | 100 |

|        |                                                                                                                                                                                                                       |                                        |      |      |     |     |
|--------|-----------------------------------------------------------------------------------------------------------------------------------------------------------------------------------------------------------------------|----------------------------------------|------|------|-----|-----|
| Q9QWL7 | Keratin, type I cytoskeletal 17 (Cytokeratin-17) (CK-17) (Keratin-17) (K17)                                                                                                                                           | Krt17 (Krt1-17)                        | 38   | 46   | 14  | 11  |
| Q9JHU4 | Cytoplasmic dynein 1 heavy chain 1 (Cytoplasmic dynein heavy chain 1) (Dynein heavy chain, cytosolic)                                                                                                                 | Dync1h1 (Dhc1) (Dnch1) (Dnchc1) (Dyhc) | 822  | 395  | 157 | 123 |
| Q7TMK6 | Protein Hook homolog 2                                                                                                                                                                                                | Hook2                                  | 33   | 36   | 26  | 20  |
| Q02956 | Protein kinase C zeta type (EC 2.7.11.13) (nPKC-zeta)                                                                                                                                                                 | Prkcz (PkcZ)                           | 29   | 15   | 8   | 6   |
| P08551 | Neurofilament light polypeptide (NF-L) (Neurofilament triplet L protein) (68 kDa neurofilament protein)                                                                                                               | Nefl (Nf68) (Nfl)                      | 51   | 36   | 17  | 12  |
| Q9CWF2 | Tubulin beta-2B chain                                                                                                                                                                                                 | Tubb2b                                 | 1435 | 825  | 86  | 59  |
| P99024 | Tubulin beta-5 chain                                                                                                                                                                                                  | Tubb5                                  | 1377 | 976  | 88  | 60  |
| Q62168 | Keratin, type I cuticular Ha2 (Hair keratin, type I Ha2) (Keratin-32) (K32)                                                                                                                                           | Krt32 (Hka2) (Krt1-2) (Krtha2)         | 39   | 36   | 9   | 6   |
| Q8K4L3 | Supervillin (Archvillin) (p205/p250)                                                                                                                                                                                  | Svil                                   | 25   | 22   | 18  | 12  |
| P68033 | Actin, alpha cardiac muscle 1 (Alpha-cardiac actin)                                                                                                                                                                   | Actc1 (Actc)                           | 3948 | 2726 | 234 | 155 |
| P68372 | Tubulin beta-2C chain                                                                                                                                                                                                 | Tubb2c                                 | 1300 | 891  | 78  | 51  |
| Q7TMM9 | Tubulin beta-2A chain                                                                                                                                                                                                 | Tubb2a (Tubb2)                         | 1422 | 775  | 83  | 52  |
| Q61879 | Myosin-10 (Myosin heavy chain 10) (Myosin heavy chain, non-muscle IIb) (Non-muscle myosin heavy chain IIb) (NMMHC II-b) (NMMHC-IIB) (Cellular myosin heavy chain, type B) (Non-muscle myosin heavy chain-B) (NMMHC-B) | Myh10                                  | 122  | 101  | 65  | 40  |
| P26040 | Ezrin (p81) (Cytovillin) (Villin-2)                                                                                                                                                                                   | Ezr (Vil2)                             | 127  | 106  | 27  | 16  |
| P47757 | F-actin-capping protein subunit beta (CapZ beta)                                                                                                                                                                      | Capzb (Cappb1)                         | 107  | 68   | 7   | 4   |
| P26043 | Radixin (ESP10)                                                                                                                                                                                                       | Rdx                                    | 127  | 106  | 23  | 13  |
| Q9D6F9 | Tubulin beta-4 chain                                                                                                                                                                                                  | Tubb4                                  | 888  | 493  | 58  | 31  |
| Q922F4 | Tubulin beta-6 chain                                                                                                                                                                                                  | Tubb6                                  | 583  | 382  | 40  | 21  |

|                              |                                                                                       |                                                                                                                                     |                                       |     |      |    |     |
|------------------------------|---------------------------------------------------------------------------------------|-------------------------------------------------------------------------------------------------------------------------------------|---------------------------------------|-----|------|----|-----|
|                              | Q9ERD7                                                                                | Tubulin beta-3 chain                                                                                                                | Tubb3                                 | 780 | 383  | 52 | 27  |
| actin filament-based process | P62962                                                                                | Profilin-1 (Profilin I)                                                                                                             | Pfn1                                  | 30  | 93   | 4  | 7   |
|                              | P18760                                                                                | Cofilin-1 (Cofilin, non-muscle isoform)                                                                                             | Cfl1                                  | 959 | 2552 | 70 | 122 |
|                              | Q80Y17                                                                                | Lethal(2) giant larvae protein homolog 1 (LLGL) (Mgl) (Mgl-1)                                                                       | Ligl1 (Llglh)                         | 30  | 29   | 7  | 11  |
|                              | P63001                                                                                | Ras-related C3 botulinum toxin substrate 1 (p21-Rac1)                                                                               | Rac1                                  | 31  | 99   | 7  | 11  |
|                              | Q8VHX6                                                                                | Filamin-C (Gamma-filamin) (Filamin-2) (FLN-C) (Actin-binding-like protein) (ABP-L) (ABP-280-like protein)                           | FlnC (Abpl) (Fln2)                    | 33  | 115  | 18 | 25  |
|                              | P47753                                                                                | F-actin-capping protein subunit alpha-1 (CapZ alpha-1)                                                                              | Capza1 (Cappa1)                       | 60  | 33   | 7  | 9   |
|                              | P47754                                                                                | F-actin-capping protein subunit alpha-2 (CapZ alpha-2)                                                                              | Capza2 (Cappa2)                       | 60  | 33   | 5  | 6   |
|                              | Q9WUM4                                                                                | Coronin-1C (Coronin-3)                                                                                                              | Coro1c                                | 42  | 28   | 18 | 21  |
|                              | Q62418                                                                                | Drebrin-like protein (SH3 domain-containing protein 7) (Actin-binding protein 1)                                                    | Dbnl (Abp1) (Sh3p7)                   | 24  | 39   | 7  | 8   |
|                              | P40124                                                                                | Adenylyl cyclase-associated protein 1 (CAP 1)                                                                                       | Cap1 (Cap)                            | 22  | 43   | 8  | 9   |
|                              | P19001                                                                                | Keratin, type I cytoskeletal 19 (Cytokeratin-19) (CK-19) (Keratin-19) (K19)                                                         | Krt19 (Krt1-19)                       | 37  | 46   | 11 | 12  |
|                              | Q9QUI0                                                                                | Transforming protein RhoA                                                                                                           | Rhoa (Arha) (Arha2)                   | 117 | 231  | 11 | 12  |
|                              | P16546                                                                                | Spectrin alpha chain, brain (Spectrin, non-erythroid alpha chain) (Alpha-II spectrin) (Fodrin alpha chain)                          | Sptan1 (Spna2) (Spta2)                | 68  | 86   | 66 | 69  |
|                              | P26039                                                                                | Talin-1                                                                                                                             | Tln1 (Tln)                            | 123 | 161  | 41 | 42  |
|                              | Q62261                                                                                | Spectrin beta chain, brain 1 (Spectrin, non-erythroid beta chain 1) (Beta-II spectrin) (Fodrin beta chain) (Embryonic liver fodrin) | Sptbn1 (Elf) (Spnb-2) (Spnb2) (Sptb2) | 56  | 54   | 48 | 48  |
| O08638                       | Myosin-11 (Myosin heavy chain 11) (Myosin heavy chain, smooth muscle isoform) (SMMHC) | Myh11                                                                                                                               | 211                                   | 221 | 79   | 76 |     |

|                                                |        |                                                                                                                                                                                                                       |                    |      |      |     |     |
|------------------------------------------------|--------|-----------------------------------------------------------------------------------------------------------------------------------------------------------------------------------------------------------------------|--------------------|------|------|-----|-----|
|                                                | Q8VDD5 | Myosin-9 (Myosin heavy chain 9) (Myosin heavy chain, non-muscle IIa) (Non-muscle myosin heavy chain IIa) (NMMHC II-a) (NMMHC-IIA) (Cellular myosin heavy chain, type A) (Non-muscle myosin heavy chain-A) (NMMHC-A)   | Myh9               | 780  | 839  | 127 | 115 |
|                                                | Q99104 | Myosin-Va (Dilute myosin heavy chain, non-muscle)                                                                                                                                                                     | Myo5a (Dilute)     | 28   | 34   | 35  | 31  |
|                                                | Q9R0P5 | Destrin (Actin-depolymerizing factor) (ADF) (Sid 23)                                                                                                                                                                  | Dstn (Dsn) (Sid23) | 61   | 81   | 8   | 7   |
|                                                | Q6URW6 | Myosin-14 (Myosin heavy chain 14) (Myosin heavy chain, non-muscle IIc) (Non-muscle myosin heavy chain IIc) (NMHC II-C)                                                                                                | Myh14              | 60   | 48   | 53  | 44  |
|                                                | Q8K4L3 | Supervillin (Archvillin) (p205/p250)                                                                                                                                                                                  | Svil               | 25   | 22   | 18  | 12  |
|                                                | P68033 | Actin, alpha cardiac muscle 1 (Alpha-cardiac actin)                                                                                                                                                                   | Actc1 (Actc)       | 3948 | 2726 | 234 | 155 |
|                                                | Q61879 | Myosin-10 (Myosin heavy chain 10) (Myosin heavy chain, non-muscle IIb) (Non-muscle myosin heavy chain IIb) (NMMHC II-b) (NMMHC-IIB) (Cellular myosin heavy chain, type B) (Non-muscle myosin heavy chain-B) (NMMHC-B) | Myh10              | 122  | 101  | 65  | 40  |
|                                                | P26040 | Ezrin (p81) (Cytovillin) (Villin-2)                                                                                                                                                                                   | Ezr (Vil2)         | 127  | 106  | 27  | 16  |
|                                                | P47757 | F-actin-capping protein subunit beta (CapZ beta)                                                                                                                                                                      | Capzb (Cappb1)     | 107  | 68   | 7   | 4   |
|                                                | P26043 | Radixin (ESP10)                                                                                                                                                                                                       | Rdx                | 127  | 106  | 23  | 13  |
| cellular component organization and biogenesis | P04104 | Keratin, type II cytoskeletal 1 (Cytokeratin-1) (CK-1) (Keratin-1) (K1) (67 kDa cyokeratin) (Krt1 protein)                                                                                                            | Krt1 (Krt2-1)      | 87   | 124  | 14  | 27  |
|                                                | Q8BTM8 | Filamin-A (Alpha-filamin) (Filamin-1) (Endothelial actin-binding protein) (Actin-binding protein 280) (ABP-280) (Non-muscle filamin)                                                                                  | Flna (Fln) (Fln1)  | 254  | 1031 | 46  | 86  |
|                                                | Q7TSG3 | F-box only protein 5 (Early mitotic inhibitor 1)                                                                                                                                                                      | Fbxo5 (Emi1)       | 15   | 27   | 5   | 9   |

|        |                                                                                                                                                     |                                                                                                                                                    |     |      |    |     |
|--------|-----------------------------------------------------------------------------------------------------------------------------------------------------|----------------------------------------------------------------------------------------------------------------------------------------------------|-----|------|----|-----|
| Q99N50 | Synaptotagmin-like protein 2 (Exophilin-4)                                                                                                          | Syt12 (Slp2)                                                                                                                                       | 26  | 77   | 10 | 18  |
| Q61414 | Keratin, type I cytoskeletal 15 (Cytokeratin-15) (CK-15) (Keratin-15) (K15)                                                                         | Krt15 (Krt1-15)                                                                                                                                    | 37  | 46   | 4  | 7   |
| P62962 | Profilin-1 (Profilin I)                                                                                                                             | Pfn1                                                                                                                                               | 30  | 93   | 4  | 7   |
| P18760 | Cofilin-1 (Cofilin, non-muscle isoform)                                                                                                             | Cfl1                                                                                                                                               | 959 | 2552 | 70 | 122 |
| Q9ERK4 | Exportin-2 (Exp2) (Importin-alpha re-exporter) (Chromosome segregation 1-like protein)                                                              | Cse1l (Xpo2)                                                                                                                                       | 42  | 153  | 26 | 44  |
| Q8CGP2 | Histone H2B type 1-P                                                                                                                                | Hist1h2bp                                                                                                                                          | 436 | 999  | 46 | 77  |
| P62806 | Histone H4                                                                                                                                          | Hist1h4a;<br>Hist1h4b (H4-53); Hist1h4c (H4-12); Hist1h4d; Hist1h4f; Hist1h4h; Hist1h4i; Hist1h4j; Hist1h4k; Hist1h4m; Hist2h4a (Hist2h4); Hist4h4 | 815 | 1617 | 47 | 78  |
| Q922U2 | Keratin, type II cytoskeletal 5 (Cytokeratin-5) (CK-5) (Keratin-5) (K5)                                                                             | Krt5 (Krt2-5)                                                                                                                                      | 396 | 550  | 23 | 38  |
| Q64475 | Histone H2B type 1-B (h2B-143)                                                                                                                      | Hist1h2bb                                                                                                                                          | 436 | 999  | 46 | 75  |
| Q6ZWX6 | Eukaryotic translation initiation factor 2 subunit 1 (Eukaryotic translation initiation factor 2 subunit alpha) (eIF-2-alpha) (EIF-2alpha) (EIF-2A) | Eif2s1 (Eif2a)                                                                                                                                     | 27  | 177  | 7  | 11  |
| Q80Y17 | Lethal(2) giant larvae protein homolog 1 (LLGL) (Mgl) (Mgl-1)                                                                                       | Llg1 (Llg1h)                                                                                                                                       | 30  | 29   | 7  | 11  |
| P63001 | Ras-related C3 botulinum toxin substrate 1 (p21-Rac1)                                                                                               | Rac1                                                                                                                                               | 31  | 99   | 7  | 11  |
| P62082 | 40S ribosomal protein S7                                                                                                                            | Rps7                                                                                                                                               | 104 | 126  | 9  | 14  |
| P61982 | 14-3-3 protein gamma                                                                                                                                | Ywhag                                                                                                                                              | 653 | 841  | 53 | 79  |

|        |                                                                                                                                                                                  |                                 |      |      |    |    |
|--------|----------------------------------------------------------------------------------------------------------------------------------------------------------------------------------|---------------------------------|------|------|----|----|
| Q3THW5 | Histone H2A.V (H2A.F/Z)                                                                                                                                                          | H2afv (H2av)                    | 297  | 426  | 11 | 16 |
| P07744 | Keratin, type II cytoskeletal 4 (Cytokeratin-4) (CK-4) (Keratin-4) (K4) (Cytoskeletal 57 kDa keratin)                                                                            | Krt4 (Krt2-4)                   | 36   | 74   | 19 | 27 |
| Q8VHX6 | Filamin-C (Gamma-filamin) (Filamin-2) (FLN-C) (Actin-binding-like protein) (ABP-L) (ABP-280-like protein)                                                                        | Finc (Abpl) (Fln2)              | 33   | 115  | 18 | 25 |
| P68510 | 14-3-3 protein eta                                                                                                                                                               | Ywhah                           | 707  | 962  | 58 | 80 |
| P70696 | Histone H2B type 1-A (Histone H2B, testis) (Testis-specific histone H2B)                                                                                                         | Hist1h2ba (Th2b)                | 146  | 378  | 37 | 51 |
| P05214 | Tubulin alpha-3 chain (Tubulin alpha-3/alpha-7 chain) (Alpha-tubulin 3/7) (Alpha-tubulin isotype M-alpha-3/7)                                                                    | Tuba3a (Tuba3); Tuba3b (Tuba7)  | 1112 | 1288 | 61 | 84 |
| Q61937 | Nucleophosmin (NPM) (Nucleolar phosphoprotein B23) (Numatrin) (Nucleolar protein NO38)                                                                                           | Npm1                            | 92   | 66   | 11 | 15 |
| Q99M73 | Keratin, type II cuticular Hb4 (Type II hair keratin Hb4) (Keratin-84) (K84) (65 kDa type II keratin)                                                                            | Krt84 (Krt2-16) (Krt84) (Krt84) | 36   | 74   | 14 | 19 |
| Q61789 | Laminin subunit alpha-3 (Nicein subunit alpha)                                                                                                                                   | Lama3                           | 26   | 26   | 37 | 50 |
| Q9EPL8 | Importin-7 (Imp7) (Ran-binding protein 7) (RanBP7)                                                                                                                               | Ipo7 (Ranbp7)                   | 25   | 121  | 9  | 12 |
| Q9ERU9 | E3 SUMO-protein ligase RanBP2 (Ran-binding protein 2)                                                                                                                            | Ranbp2                          | 56   | 49   | 40 | 53 |
| P35700 | Peroxiredoxin-1 (EC 1.11.1.15) (Thioredoxin peroxidase 2) (Thioredoxin-dependent peroxide reductase 2) (Osteoblast-specific factor 3) (OSF-3) (Macrophage 23 kDa stress protein) | Prdx1 (Msp23) (Paga) (Tdp2)     | 836  | 1095 | 75 | 99 |
| P70168 | Importin subunit beta-1 (Karyopherin subunit beta-1) (Nuclear factor P97) (Pore targeting complex 97 kDa subunit) (PTAC97) (SCG)                                                 | Kpnb1 (Impnb)                   | 48   | 17   | 13 | 17 |



|        |                                                                                                                                                                                                                             |                                  |      |      |     |     |
|--------|-----------------------------------------------------------------------------------------------------------------------------------------------------------------------------------------------------------------------------|----------------------------------|------|------|-----|-----|
| Q9Z277 | Bromodomain adjacent to zinc finger domain protein 1B (Williams-Beuren syndrome chromosomal region 9 protein homolog) (WBRS9)                                                                                               | Baz1b (Wbscr9)                   | 43   | 17   | 26  | 34  |
| Q921C5 | Protein bicaudal D homolog 2 (Bic-D 2)                                                                                                                                                                                      | Bicd2 (Kiaa0699)                 | 31   | 23   | 26  | 34  |
| Q61595 | Kinectin                                                                                                                                                                                                                    | Ktn1                             | 15   | 50   | 43  | 56  |
| P47753 | F-actin-capping protein subunit alpha-1 (CapZ alpha-1)                                                                                                                                                                      | Capza1 (Cappa1)                  | 60   | 33   | 7   | 9   |
| Q07133 | Histone H1t (Testicular H1 histone)                                                                                                                                                                                         | Hist1h1t (H1ft) (H1t)            | 46   | 72   | 54  | 69  |
| O70456 | 14-3-3 protein sigma (Stratifin)                                                                                                                                                                                            | Sfn (Mkrn3)                      | 573  | 666  | 56  | 71  |
| P27661 | Histone H2A.x (H2a/x)                                                                                                                                                                                                       | H2afx (H2a.x) (H2ax) (Hist5-2ax) | 301  | 426  | 15  | 19  |
| Q62093 | Splicing factor, arginine/serine-rich 2 (Splicing factor SC35) (SC-35) (Splicing component, 35 kDa) (Protein PR264) (Putative myelin regulatory factor 1) (MRF-1)                                                           | Sfrs2 (Pr264) (Sfrs10)           | 184  | 117  | 15  | 19  |
| P20152 | Vimentin                                                                                                                                                                                                                    | Vim                              | 1749 | 2397 | 125 | 157 |
| P61028 | Ras-related protein Rab-8B                                                                                                                                                                                                  | Rab8b                            | 17   | 59   | 4   | 5   |
| P63101 | 14-3-3 protein zeta/delta (Protein kinase C inhibitor protein 1) (KCIP-1) (SEZ-2)                                                                                                                                           | Ywhaz                            | 1383 | 1947 | 96  | 120 |
| Q8R2X8 | Golgin-45 (Basic leucine zipper nuclear factor 1)                                                                                                                                                                           | Blzf1                            | 28   | 22   | 13  | 16  |
| Q61466 | SWI/SNF-related matrix-associated actin-dependent regulator of chromatin subfamily D member 1 (SWI/SNF complex 60 kDa subunit) (60 kDa BRG-1/Brm-associated factor subunit A) (BRG1-associated factor 60A) (D15KZ1 protein) | Smarcd1 (Baf60a) (D15Kz1)        | 27   | 29   | 13  | 16  |
| P49025 | Citron Rho-interacting kinase (CRIK) (EC 2.7.11.1) (Rho-interacting, serine/threonine-protein kinase 21)                                                                                                                    | Cit                              | 49   | 67   | 67  | 81  |

|        |                                                                                                                                                                                         |                            |     |     |     |     |
|--------|-----------------------------------------------------------------------------------------------------------------------------------------------------------------------------------------|----------------------------|-----|-----|-----|-----|
| P47754 | F-actin-capping protein subunit alpha-2 (CapZ alpha-2)                                                                                                                                  | Capza2 (Cappa2)            | 60  | 33  | 5   | 6   |
| Q6PDM2 | Splicing factor, arginine/serine-rich 1 (ASF/SF2)                                                                                                                                       | Sfrs1                      | 24  | 91  | 5   | 6   |
| Q8VHS2 | Crumbs homolog 1                                                                                                                                                                        | Crb1                       | 23  | 28  | 10  | 12  |
| Q60848 | Lymphocyte-specific helicase (EC 3.6.1.-) (Proliferation associated SNF2-like protein)                                                                                                  | Hells (Lsh) (Pasg)         | 37  | 35  | 10  | 12  |
| P05784 | Keratin, type I cytoskeletal 18 (Cytokeratin-18) (CK-18) (Keratin-18) (K18) (Cytokeratin endo B) (Keratin D)                                                                            | Krt18 (Kerd) (Krt1-18)     | 37  | 46  | 10  | 12  |
| P54227 | Stathmin (Phosphoprotein p19) (pp19) (Leukemia-associated phosphoprotein p18) (Oncoprotein 18) (Op18) (pp17) (Prosolin) (Metablastin) (Protein Pr22) (Leukemia-associated gene protein) | Stmn1 (Lag) (Lap18) (Pr22) | 121 | 120 | 10  | 12  |
| Q8BFY9 | Transportin-1 (Importin beta-2) (Karyopherin beta-2)                                                                                                                                    | Tnp1 (Kpnb2)               | 54  | 43  | 10  | 12  |
| Q60575 | Kinesin-like protein KIF1B                                                                                                                                                              | Kif1b                      | 45  | 95  | 30  | 36  |
| Q61771 | Kinesin-like protein KIF3B (Microtubule plus end-directed kinesin motor 3B)                                                                                                             | Kif3b                      | 30  | 51  | 16  | 19  |
| Q9R0K7 | Plasma membrane calcium-transporting ATPase 2 (PMCA2) (EC 3.6.3.8) (Plasma membrane calcium ATPase isoform 2) (Plasma membrane calcium pump isoform 2)                                  | Atp2b2 (Pmca2)             | 32  | 27  | 70  | 83  |
| Q8C3X4 | GTP-binding protein GUF1 homolog                                                                                                                                                        | Guf1                       | 311 | 506 | 412 | 483 |
| Q9WUM4 | Coronin-1C (Coronin-3)                                                                                                                                                                  | Coro1c                     | 42  | 28  | 18  | 21  |
| Q6GSS7 | Histone H2A type 2-A (H2A.2) (H2a-614) (H2a-615)                                                                                                                                        | Hist2h2aa1; Hist2h2aa2     | 505 | 763 | 18  | 21  |
| Q5SPW0 | Vacuolar protein sorting-associated protein 54 (Tumor antigen SLP-8p homolog)                                                                                                           | Vps54                      | 36  | 28  | 13  | 15  |
| P48754 | Breast cancer type 1 susceptibility protein homolog                                                                                                                                     | Brca1                      | 28  | 25  | 26  | 30  |
| Q9JKP5 | Muscleblind-like protein 1 (Triplet-expansion RNA-binding protein)                                                                                                                      | Mbnl1 (Exp) (Mbnl)         | 45  | 63  | 244 | 281 |

|        |                                                                                                                                          |                                   |     |     |     |     |
|--------|------------------------------------------------------------------------------------------------------------------------------------------|-----------------------------------|-----|-----|-----|-----|
| Q62418 | Drebrin-like protein (SH3 domain-containing protein 7) (Actin-binding protein 1)                                                         | Dbnl (Abp1) (Sh3p7)               | 24  | 39  | 7   | 8   |
| Q9Z2K1 | Keratin, type I cytoskeletal 16 (Cytokeratin-16) (CK-16) (Keratin-16) (K16)                                                              | Krt16 (Krt1-16)                   | 37  | 37  | 7   | 8   |
| P58660 | Caspase recruitment domain-containing protein 10 (Bcl10-interacting MAGUK protein 1) (Bimp1)                                             | Card10 (Bimp1)                    | 33  | 23  | 15  | 17  |
| P62270 | 40S ribosomal protein S18 (Ke-3) (Ke3)                                                                                                   | Rps18                             | 210 | 209 | 15  | 17  |
| P55200 | Histone-lysine N-methyltransferase HRX (EC 2.1.1.43) (Zinc finger protein HRX) (ALL-1)                                                   | Mll (All1) (Hrx) (Mll1)           | 67  | 26  | 39  | 44  |
| Q9CQV8 | 14-3-3 protein beta/alpha (Protein kinase C inhibitor protein 1) (KCIP-1)                                                                | Ywhab                             | 983 | 971 | 71  | 80  |
| P40124 | Adenylyl cyclase-associated protein 1 (CAP 1)                                                                                            | Cap1 (Cap)                        | 22  | 43  | 8   | 9   |
| P41230 | Histone demethylase JARID1C (EC 1.14.11.-) (Jumonji/ARID domain-containing protein 1C) (Protein SmcX) (Protein Xe169)                    | Jarid1c (Kiaa0234) (Smcx) (Xe169) | 34  | 32  | 26  | 29  |
| P26618 | Alpha-type platelet-derived growth factor receptor (EC 2.7.10.1) (PDGF-R-alpha) (CD140 antigen-like family member A) (CD antigen CD140a) | Pdgfra                            | 37  | 73  | 160 | 178 |
| Q91ZT5 | FYVE, RhoGEF and PH domain-containing protein 4 (Actin filament-binding protein frabin) (FGD1-related F-actin-binding protein)           | Fgd4                              | 29  | 19  | 10  | 11  |
| P19001 | Keratin, type I cytoskeletal 19 (Cytokeratin-19) (CK-19) (Keratin-19) (K19)                                                              | Krt19 (Krt1-19)                   | 37  | 46  | 11  | 12  |
| Q9QUI0 | Transforming protein RhoA                                                                                                                | Rhoa (Arha) (Arha2)               | 117 | 231 | 11  | 12  |
| P27546 | Microtubule-associated protein 4 (MAP-4)                                                                                                 | Map4 (Mtap4)                      | 94  | 41  | 33  | 36  |

|        |                                                                                                                                                                                                                                       |                                    |     |     |    |    |
|--------|---------------------------------------------------------------------------------------------------------------------------------------------------------------------------------------------------------------------------------------|------------------------------------|-----|-----|----|----|
| Q6P9Z1 | SWI/SNF-related matrix-associated actin-dependent regulator of chromatin subfamily D member 3 (60 kDa BRG-1/Brm-associated factor subunit C) (BRG1-associated factor 60C) (mBAF60c)                                                   | Smarcd3 (Baf60c)                   | 29  | 19  | 46 | 50 |
| P38647 | Stress-70 protein, mitochondrial (75 kDa glucose-regulated protein) (GRP 75) (Heat shock 70 kDa protein 9) (Peptide-binding protein 74) (PBP74) (P66 MOT) (Mortalin)                                                                  | Hspa9 (Grp75) (Hsp74) (Hspa9a)     | 33  | 33  | 12 | 13 |
| Q8BKC5 | Importin-5 (Imp5) (Importin subunit beta-3) (Karyopherin beta-3) (Ran-binding protein 5) (RanBP5)                                                                                                                                     | Ipo5 (Kpnb3) (Ranbp5)              | 185 | 91  | 12 | 13 |
| Q9Z104 | SWI/SNF-related matrix-associated actin-dependent regulator of chromatin subfamily E member 1-related (SMARCE1-related protein) (HMG box-containing protein 20B) (Structural DNA-binding protein BRAF35) (BRCA2-associated factor 35) | Hmg20b (Braf35) (Hmgx2) (Smarce1r) | 30  | 20  | 14 | 15 |
| P62242 | 40S ribosomal protein S8                                                                                                                                                                                                              | Rps8                               | 479 | 372 | 18 | 19 |
| Q8VI56 | Low-density lipoprotein receptor-related protein 4 (LDLR dan)                                                                                                                                                                         | Lrp4 (Kiaa0816)                    | 77  | 30  | 19 | 20 |
| P16546 | Spectrin alpha chain, brain (Spectrin, non-erythroid alpha chain) (Alpha-II spectrin) (Fodrin alpha chain)                                                                                                                            | Sptan1 (Spna2) (Spta2)             | 68  | 86  | 66 | 69 |
| Q61820 | GTP-binding nuclear protein Ran, testis-specific isoform                                                                                                                                                                              | Rasl2-9                            | 564 | 570 | 23 | 24 |
| Q920R0 | Alsin (Amyotrophic lateral sclerosis protein 2 homolog)                                                                                                                                                                               | Als2                               | 74  | 88  | 72 | 75 |
| P26039 | Talin-1                                                                                                                                                                                                                               | Tln1 (Tln)                         | 123 | 161 | 41 | 42 |
| P30416 | FK506-binding protein 4 (EC 5.2.1.8) (Peptidyl-prolyl cis-trans isomerase) (PPlase) (Rotamase) (HSP-binding immunophilin) (HBI) (FKBP52 protein) (52 kDa FK506-binding protein) (FKBP59) (p59 protein)                                | Fkbp4                              | 40  | 62  | 8  | 8  |
| Q8C0N1 | Kinesin-like protein KIF2B                                                                                                                                                                                                            | Kif2b                              | 17  | 26  | 8  | 8  |

|        |                                                                                                                                                                                                              |                                        |      |     |     |     |
|--------|--------------------------------------------------------------------------------------------------------------------------------------------------------------------------------------------------------------|----------------------------------------|------|-----|-----|-----|
| Q9R190 | Metastasis-associated protein MTA2 (Metastasis-associated 1-like 1)                                                                                                                                          | Mta2 (Mta111)                          | 27   | 26  | 9   | 9   |
| Q9D289 | Trafficking protein particle complex subunit 6B                                                                                                                                                              | Trappc6b                               | 62   | 69  | 9   | 9   |
| Q6P5F9 | Exportin-1 (Exp1) (Chromosome region maintenance 1 protein homolog)                                                                                                                                          | Xpo1 (Crm1)                            | 19   | 43  | 9   | 9   |
| Q61781 | Keratin, type I cytoskeletal 14 (Cytokeratin-14) (CK-14) (Keratin-14) (K14)                                                                                                                                  | Krt14 (Krt1-14)                        | 38   | 37  | 10  | 10  |
| Q9CQ60 | 6-phosphogluconolactonase (6PGL) (EC 3.1.1.31)                                                                                                                                                               | Pgls                                   | 148  | 41  | 11  | 11  |
| Q9WV80 | Sorting nexin-1                                                                                                                                                                                              | Snx1                                   | 23   | 49  | 11  | 11  |
| Q9JIF7 | Coatamer subunit beta (Beta-coat protein) (Beta-COP)                                                                                                                                                         | Copb1 (Copb)                           | 37   | 22  | 15  | 15  |
| P30681 | High mobility group protein B2 (High mobility group protein 2) (HMG-2)                                                                                                                                       | Hmgb2 (Hmg2)                           | 94   | 222 | 24  | 24  |
| Q62261 | Spectrin beta chain, brain 1 (Spectrin, non-erythroid beta chain 1) (Beta-II spectrin) (Fodrin beta chain) (Embryonic liver fodrin)                                                                          | Sptbn1 (Elf) (Spnb-2) (Spnb2) (Sptb2)  | 56   | 54  | 48  | 48  |
| Q8K4E0 | Alstrom syndrome protein 1 homolog                                                                                                                                                                           | Alms1 (Kiaa0328)                       | 29   | 30  | 86  | 86  |
| Q9QYX7 | Protein piccolo (Aczonin) (Multidomain presynaptic cytomatrix protein) (Brain-derived HLMN protein)                                                                                                          | Pclo (Acz)                             | 101  | 117 | 114 | 114 |
| P68254 | 14-3-3 protein theta (14-3-3 protein tau)                                                                                                                                                                    | Ywhaq                                  | 1104 | 994 | 92  | 91  |
| O08638 | Myosin-11 (Myosin heavy chain 11) (Myosin heavy chain, smooth muscle isoform) (SMMHC)                                                                                                                        | Myh11                                  | 211  | 221 | 79  | 76  |
| Q9QXL1 | Kinesin-like protein KIF21B (Kinesin-like protein KIF6)                                                                                                                                                      | Kif21b (Kif6)                          | 22   | 45  | 26  | 25  |
| Q8R4B8 | NACHT, LRR and PYD domains-containing protein 3 (Cold autoinflammatory syndrome 1 protein homolog) (Cryopyrin) (PYRIN-containing APAF1-like protein 1) (Mast cell maturation-associated-inducible protein 1) | Nlrp3 (Cias1) (Mmig1) (Nalp3) (Pypaf1) | 30   | 20  | 24  | 23  |

|        |                                                                                                                                                                                             |                                            |     |     |    |    |
|--------|---------------------------------------------------------------------------------------------------------------------------------------------------------------------------------------------|--------------------------------------------|-----|-----|----|----|
| P07724 | Serum albumin                                                                                                                                                                               | Alb (Alb-1)<br>(Alb1)                      | 550 | 572 | 22 | 21 |
| Q8R1B4 | Eukaryotic translation initiation factor 3 subunit C (eIF3c) (Eukaryotic translation initiation factor 3 subunit 8) (eIF3 p110)                                                             | Eif3c (Eif3s8)                             | 34  | 63  | 22 | 21 |
| Q61768 | Kinesin-1 heavy chain (Ubiquitous kinesin heavy chain) (UKHC) (Conventional kinesin heavy chain)                                                                                            | Kif5b (Khcs)<br>(Kns1)                     | 102 | 303 | 43 | 41 |
| Q6ZPK0 | PHD finger protein 21A (BRAF35-HDAC complex protein BHC80) (mBHC80) (BHC80a)                                                                                                                | Phf21a<br>(Bhc80)<br>(Kiaa1696)<br>(Pff1)  | 28  | 37  | 20 | 19 |
| P62827 | GTP-binding nuclear protein Ran (GTPase Ran) (Ras-related nuclear protein) (Ras-like protein TC4)                                                                                           | Ran (Rasl2-8)                              | 756 | 656 | 38 | 36 |
| P97412 | Lysosomal-trafficking regulator (Beige protein) (CHS1 homolog)                                                                                                                              | Lyst (Bg)<br>(Chs1)                        | 46  | 27  | 33 | 31 |
| Q99PF4 | Cadherin-23 (Otocadherin)                                                                                                                                                                   | Cdh23                                      | 29  | 32  | 29 | 27 |
| Q9D6Z1 | Nucleolar protein 5A (Nucleolar protein Nop56)                                                                                                                                              | Nol5a (Nop56)                              | 38  | 39  | 14 | 13 |
| P08730 | Keratin, type I cytoskeletal 13 (Cytokeratin-13) (CK-13) (Keratin-13) (K13) (47 kDa cyokeratin)                                                                                             | Krt13 (Krt1-13)                            | 37  | 46  | 13 | 12 |
| Q8R5G7 | Centaurin-delta-3 (Cnt-d3) (Arf-GAP, Rho-GAP, ankyrin repeat and pleckstrin homology domain-containing protein 3) (Dual specificity Rho- and Arf-GTPase-activating protein 1)               | Centd3<br>(Arap3)<br>(Drag1)<br>(Kiaa4097) | 21  | 27  | 26 | 24 |
| Q7TMY8 | E3 ubiquitin-protein ligase HUWE1 (EC 6.3.2.-) (HECT, UBA and WWE domain-containing protein 1) (Upstream regulatory element-binding protein 1) (URE-binding protein 1) (URE-B1) (E3Histone) | Huwe1<br>(Kiaa0312)<br>(Ureb1)             | 33  | 91  | 39 | 36 |
| Q01853 | Transitional endoplasmic reticulum ATPase (TER ATPase) (15S Mg(2+)-ATPase p97 subunit) (Valosin-containing protein) (VCP)                                                                   | Vcp                                        | 691 | 699 | 56 | 51 |

|        |                                                                                                                                                                                                                     |                           |     |     |     |     |
|--------|---------------------------------------------------------------------------------------------------------------------------------------------------------------------------------------------------------------------|---------------------------|-----|-----|-----|-----|
| P03995 | Glial fibrillary acidic protein (GFAP)                                                                                                                                                                              | Gfap                      | 63  | 90  | 22  | 20  |
| Q8VDD5 | Myosin-9 (Myosin heavy chain 9) (Myosin heavy chain, non-muscle IIa) (Non-muscle myosin heavy chain IIa) (NMMHC II-a) (NMMHC-IIA) (Cellular myosin heavy chain, type A) (Non-muscle myosin heavy chain-A) (NMMHC-A) | Myh9                      | 780 | 839 | 127 | 115 |
| P02535 | Keratin, type I cytoskeletal 10 (Cytokeratin-10) (CK-10) (Keratin-10) (K10) (56 kDa cytokeratin) (Keratin, type I cytoskeletal 59 kDa)                                                                              | Krt10 (Krt1-10)           | 252 | 152 | 19  | 17  |
| Q922G7 | Tektin-2 (Testicular tektin) (Tektin-t)                                                                                                                                                                             | Tekt2                     | 25  | 26  | 9   | 8   |
| P43277 | Histone H1.3 (H1 VAR.4) (H1d)                                                                                                                                                                                       | Hist1h1d (H1f3)           | 78  | 99  | 18  | 16  |
| Q68FD5 | Clathrin heavy chain 1                                                                                                                                                                                              | Cltc                      | 944 | 884 | 88  | 78  |
| Q99104 | Myosin-Va (Dilute myosin heavy chain, non-muscle)                                                                                                                                                                   | Myo5a (Dilute)            | 28  | 34  | 35  | 31  |
| P33173 | Kinesin-like protein KIF1A (Axonal transporter of synaptic vesicles)                                                                                                                                                | Kif1a (Atsv) (Kif1)       | 45  | 108 | 25  | 22  |
| Q9R0P5 | Destrin (Actin-depolymerizing factor) (ADF) (Sid 23)                                                                                                                                                                | Dstn (Dsn) (Sid23)        | 61  | 81  | 8   | 7   |
| Q99PG2 | Opioid growth factor receptor (OGFr) (Zeta-type opioid receptor)                                                                                                                                                    | Ogfr                      | 38  | 24  | 8   | 7   |
| Q8CJ27 | Abnormal spindle-like microcephaly-associated protein homolog (Spindle and hydroxyurea checkpoint abnormal protein) (Calmodulin-binding protein Sha1) (Calmodulin binding protein 1)                                | Aspm (Calmbp1) (Sha1)     | 35  | 23  | 55  | 48  |
| Q8VHE6 | Dynein heavy chain 5, axonemal (Axonemal beta dynein heavy chain 5) (Mdnah5) (Ciliary dynein heavy chain 5)                                                                                                         | Dnah5 (Dnahc5)            | 47  | 44  | 83  | 72  |
| Q924C1 | Exportin-5 (Exp5) (Ran-binding protein 21)                                                                                                                                                                          | Xpo5 (Kiaa1291) (Ranbp21) | 20  | 62  | 15  | 13  |
| Q921E2 | Ras-related protein Rab-31                                                                                                                                                                                          | Rab31                     | 18  | 29  | 7   | 6   |

|        |                                                                                                                                                        |                        |      |     |     |     |
|--------|--------------------------------------------------------------------------------------------------------------------------------------------------------|------------------------|------|-----|-----|-----|
| P67984 | 60S ribosomal protein L22 (Heparin-binding protein HBp15)                                                                                              | Rpl22                  | 59   | 48  | 7   | 6   |
| P35979 | 60S ribosomal protein L12                                                                                                                              | Rpl12                  | 208  | 389 | 14  | 12  |
| Q9R194 | Cryptochrome-2                                                                                                                                         | Cry2 (Kiaa0658)        | 52   | 42  | 21  | 18  |
| P14131 | 40S ribosomal protein S16                                                                                                                              | Rps16                  | 160  | 126 | 19  | 16  |
| Q8R4U0 | Stabilin-2 (Fasciclin, EGF-like, laminin-type EGF-like and link domain-containing scavenger receptor 2) (FEEL-2) [Cleaved into: Short form stabilin-2] | Stab2 (Feel2)          | 25   | 43  | 12  | 10  |
| P20357 | Microtubule-associated protein 2 (MAP-2)                                                                                                               | Map2 (Mtap2)           | 50   | 22  | 30  | 25  |
| Q91XQ0 | Dynein heavy chain 8, axonemal (Axonemal beta dynein heavy chain 8) (Ciliary dynein heavy chain 8)                                                     | Dnahc8                 | 47   | 51  | 77  | 64  |
| Q6URW6 | Myosin-14 (Myosin heavy chain 14) (Myosin heavy chain, non-muscle IIc) (Non-muscle myosin heavy chain IIc) (NMHC II-C)                                 | Myh14                  | 60   | 48  | 53  | 44  |
| P62259 | 14-3-3 protein epsilon (14-3-3E)                                                                                                                       | Ywhae                  | 1202 | 998 | 116 | 95  |
| Q6DFV7 | Nuclear receptor coactivator 7                                                                                                                         | Ncoa7                  | 25   | 16  | 11  | 9   |
| Q5XJY5 | Coatomer subunit delta (Delta-coat protein) (Delta-COP) (Archain)                                                                                      | Arcn1 (Copd)           | 61   | 45  | 10  | 8   |
| P12970 | 60S ribosomal protein L7a (Surfeit locus protein 3)                                                                                                    | Rpl7a (Surf-3) (Surf3) | 111  | 31  | 15  | 12  |
| Q99MD9 | Nuclear autoantigenic sperm protein (NASP)                                                                                                             | Nasp                   | 365  | 293 | 34  | 27  |
| Q91ZU6 | Bullous pemphigoid antigen 1, isoforms 1/2/3/4 (BPA) (Hemidesmosomal plaque protein) (Dystonia musculorum protein) (Dystonin)                          | Dst (Bpag1)            | 78   | 38  | 126 | 100 |
| P62754 | 40S ribosomal protein S6 (Phosphoprotein NP33)                                                                                                         | Rps6                   | 127  | 283 | 19  | 15  |
| Q9QWL7 | Keratin, type I cytoskeletal 17 (Cytokeratin-17) (CK-17) (Keratin-17) (K17)                                                                            | Krt17 (Krt1-17)        | 38   | 46  | 14  | 11  |



|        |                                                                                                                                               |                                        |     |     |     |     |
|--------|-----------------------------------------------------------------------------------------------------------------------------------------------|----------------------------------------|-----|-----|-----|-----|
| Q9JHU4 | Cytoplasmic dynein 1 heavy chain 1 (Cytoplasmic dynein heavy chain 1) (Dynein heavy chain, cytosolic)                                         | Dync1h1 (Dhc1) (Dnch1) (Dnchc1) (Dyhc) | 822 | 395 | 157 | 123 |
| Q6A078 | Centrosomal protein of 290 kDa (Cep290) (Nephrocystin-6)                                                                                      | Cep290 (Kiaa0373) (Nphp6)              | 32  | 57  | 85  | 66  |
| Q7TMK6 | Protein Hook homolog 2                                                                                                                        | Hook2                                  | 33  | 36  | 26  | 20  |
| P62702 | 40S ribosomal protein S4, X isoform                                                                                                           | Rps4x (Rps4)                           | 402 | 304 | 30  | 23  |
| Q99MY8 | Probable histone-lysine N-methyltransferase ASH1L (EC 2.1.1.43) (Absent small and homeotic disks protein 1 homolog) (ASH1-like protein)       | Ash1l                                  | 19  | 31  | 46  | 35  |
| P16627 | Heat shock 70 kDa protein 1L (Heat shock 70 kDa protein 1-like) (Heat shock 70 kDa-like protein 1) (Spermatid-specific heat shock protein 70) | Hspa1l (Hsc70t)                        | 319 | 238 | 33  | 25  |
| Q02956 | Protein kinase C zeta type (EC 2.7.11.13) (nPKC-zeta)                                                                                         | Prkcz (Pkcζ)                           | 29  | 15  | 8   | 6   |
| P25233 | Necdin                                                                                                                                        | Ndn                                    | 30  | 23  | 16  | 12  |
| P62264 | 40S ribosomal protein S14                                                                                                                     | Rps14                                  | 163 | 166 | 15  | 11  |
| Q61696 | Heat shock 70 kDa protein 1A (Heat shock 70 kDa protein 3) (HSP70.3) (Hsp68)                                                                  | Hspa1a (Hsp70-3) (Hsp70A1)             | 266 | 236 | 33  | 24  |
| Q99LG2 | Transportin-2 (Karyopherin beta-2b)                                                                                                           | Tnp2                                   | 42  | 32  | 7   | 5   |
| P14148 | 60S ribosomal protein L7                                                                                                                      | Rpl7                                   | 145 | 52  | 14  | 10  |
| P14869 | 60S acidic ribosomal protein P0 (L10E)                                                                                                        | Rplp0 (Arbp)                           | 115 | 334 | 28  | 20  |
| P08551 | Neurofilament light polypeptide (NF-L) (Neurofilament triplet L protein) (68 kDa neurofilament protein)                                       | Nefl (Nf68) (Nfl)                      | 51  | 36  | 17  | 12  |
| P51410 | 60S ribosomal protein L9                                                                                                                      | Rpl9                                   | 187 | 212 | 17  | 12  |
| P61294 | Ras-related protein Rab-6B                                                                                                                    | Rab6b (D9Bwg0185e)                     | 18  | 53  | 10  | 7   |

|        |                                                                                                                                                                                                                       |                                    |      |      |     |     |
|--------|-----------------------------------------------------------------------------------------------------------------------------------------------------------------------------------------------------------------------|------------------------------------|------|------|-----|-----|
| Q91YJ5 | Translation initiation factor IF-2, mitochondrial (IF-2Mt) (IF2(mt)) (IF-2(Mt))                                                                                                                                       | Mtif2                              | 29   | 23   | 13  | 9   |
| Q9CWF2 | Tubulin beta-2B chain                                                                                                                                                                                                 | Tubb2b                             | 1435 | 825  | 86  | 59  |
| P99024 | Tubulin beta-5 chain                                                                                                                                                                                                  | Tubb5                              | 1377 | 976  | 88  | 60  |
| Q6PHN9 | Ras-related protein Rab-35                                                                                                                                                                                            | Rab35                              | 17   | 59   | 3   | 2   |
| Q8C9S8 | Cysteine protease ATG4A (EC 3.4.22.-) (Autophagy-related protein 4 homolog A) (Autophagin-2) (Autophagy-related cysteine endopeptidase 2) (AUT-like 2 cysteine endopeptidase)                                         | Atg4a (Apg4a) (Autl2)              | 26   | 21   | 6   | 4   |
| P43275 | Histone H1.1 (H1 VAR.3) (H1a)                                                                                                                                                                                         | Hist1h1a (H1f1)                    | 28   | 90   | 9   | 6   |
| Q62168 | Keratin, type I cuticular Ha2 (Hair keratin, type I Ha2) (Keratin-32) (K32)                                                                                                                                           | Krt32 (Hka2) (Krt1-2) (Krtha2)     | 39   | 36   | 9   | 6   |
| Q8K4L3 | Supervillin (Archvillin) (p205/p250)                                                                                                                                                                                  | Svil                               | 25   | 22   | 18  | 12  |
| P68033 | Actin, alpha cardiac muscle 1 (Alpha-cardiac actin)                                                                                                                                                                   | Actc1 (Actc)                       | 3948 | 2726 | 234 | 155 |
| P68372 | Tubulin beta-2C chain                                                                                                                                                                                                 | Tubb2c                             | 1300 | 891  | 78  | 51  |
| Q8CG48 | Structural maintenance of chromosomes protein 2 (Chromosome-associated protein E) (XCAP-E homolog) (FGF-inducible protein 16)                                                                                         | Smc2 (Cape) (Fin16) (Smc2l1)       | 32   | 36   | 41  | 26  |
| Q7TMM9 | Tubulin beta-2A chain                                                                                                                                                                                                 | Tubb2a (Tubb2)                     | 1422 | 775  | 83  | 52  |
| O35551 | Rab GTPase-binding effector protein 1 (Rabaptin-5) (Rabaptin-5alpha)                                                                                                                                                  | Rabep1 (Rab5ep) (Rabpt5) (Rabpt5a) | 33   | 26   | 26  | 16  |
| Q61879 | Myosin-10 (Myosin heavy chain 10) (Myosin heavy chain, non-muscle IIb) (Non-muscle myosin heavy chain IIb) (NMMHC II-b) (NMMHC-IIB) (Cellular myosin heavy chain, type B) (Non-muscle myosin heavy chain-B) (NMMHC-B) | Myh10                              | 122  | 101  | 65  | 40  |

|        |                                                                                                                                                                                                                                     |                           |     |     |    |    |
|--------|-------------------------------------------------------------------------------------------------------------------------------------------------------------------------------------------------------------------------------------|---------------------------|-----|-----|----|----|
| O35344 | Importin subunit alpha-3 (Karyopherin subunit alpha-3) (Importin alpha Q2) (Qip2)                                                                                                                                                   | Kpna3 (Qip2)              | 24  | 28  | 10 | 6  |
| Q9EQZ6 | Rap guanine nucleotide exchange factor 4 (cAMP-regulated guanine nucleotide exchange factor II) (cAMP-GEFII) (Exchange factor directly activated by cAMP 2) (Epac 2) (cAMP-dependent Rap1 guanine-nucleotide exchange factor)       | Rapgef4 (Cgef2) (Epac2)   | 47  | 23  | 20 | 12 |
| Q6NZJ6 | Eukaryotic translation initiation factor 4 gamma 1 (eIF-4-gamma 1) (eIF-4G 1) (eIF-4G1)                                                                                                                                             | Eif4g1                    | 47  | 113 | 30 | 18 |
| P26040 | Ezrin (p81) (Cytovillin) (Villin-2)                                                                                                                                                                                                 | Ezr (Vil2)                | 127 | 106 | 27 | 16 |
| P41105 | 60S ribosomal protein L28                                                                                                                                                                                                           | Rpl28                     | 49  | 41  | 19 | 11 |
| Q9CZX8 | 40S ribosomal protein S19                                                                                                                                                                                                           | Rps19                     | 206 | 146 | 19 | 11 |
| P47963 | 60S ribosomal protein L13 (A52)                                                                                                                                                                                                     | Rpl13                     | 744 | 379 | 47 | 27 |
| P47757 | F-actin-capping protein subunit beta (CapZ beta)                                                                                                                                                                                    | Capzb (Cappb1)            | 107 | 68  | 7  | 4  |
| P26043 | Radixin (ESP10)                                                                                                                                                                                                                     | Rdx                       | 127 | 106 | 23 | 13 |
| P97461 | 40S ribosomal protein S5                                                                                                                                                                                                            | Rps5                      | 89  | 33  | 32 | 18 |
| P63073 | Eukaryotic translation initiation factor 4E (eIF-4E) (eIF4E) (mRNA cap-binding protein) (eIF-4F 25 kDa subunit)                                                                                                                     | Eif4e                     | 110 | 25  | 9  | 5  |
| Q8BYH8 | Chromodomain-helicase-DNA-binding protein 9 (CHD-9) (EC 3.6.1.-) (ATP-dependent helicase CHD9) (Peroxisomal proliferator-activated receptor A-interacting complex 320 kDa protein) (PPAR-alpha-interacting complex protein 320 kDa) | Chd9 (Kiaa0308) (Pric320) | 39  | 27  | 49 | 27 |
| P17918 | Proliferating cell nuclear antigen (PCNA) (Cyclin)                                                                                                                                                                                  | Pcna                      | 273 | 207 | 20 | 11 |
| Q9WV89 | Syntaxin-binding protein 4 (Syntaxin 4-interacting protein) (Synip) (STX4-interacting protein)                                                                                                                                      | Stxbp4                    | 41  | 19  | 11 | 6  |
| Q9D6F9 | Tubulin beta-4 chain                                                                                                                                                                                                                | Tubb4                     | 888 | 493 | 58 | 31 |

|                 |        |                                                                                                                                                                      |                                    |      |      |     |     |
|-----------------|--------|----------------------------------------------------------------------------------------------------------------------------------------------------------------------|------------------------------------|------|------|-----|-----|
|                 | P11103 | Poly [ADP-ribose] polymerase 1 (PARP-1) (EC 2.4.2.30) (ADPRT) (NAD(+) ADP-ribosyltransferase 1) (Poly[ADP-ribose] synthetase 1) (msPARP)                             | Parp1 (Adprp) (Adprt) (Adprt1)     | 21   | 26   | 17  | 9   |
|                 | Q922F4 | Tubulin beta-6 chain                                                                                                                                                 | Tubb6                              | 583  | 382  | 40  | 21  |
|                 | P97351 | 40S ribosomal protein S3a                                                                                                                                            | Rps3a                              | 899  | 392  | 50  | 26  |
|                 | Q9ERD7 | Tubulin beta-3 chain                                                                                                                                                 | Tubb3                              | 780  | 383  | 52  | 27  |
| protein folding | P17742 | Peptidyl-prolyl cis-trans isomerase A (PPIase A) (Rotamase A) (EC 5.2.1.8) (Cyclophilin A) (Cyclosporin A-binding protein) (SP18)                                    | Ppia                               | 855  | 1549 | 38  | 66  |
|                 | Q9ERU9 | E3 SUMO-protein ligase RanBP2 (Ran-binding protein 2)                                                                                                                | Ranbp2                             | 56   | 49   | 40  | 53  |
|                 | Q61316 | Heat shock 70 kDa protein 4 (Heat shock 70-related protein APG-2)                                                                                                    | Hspa4 (Apg2) (Hsp110)              | 379  | 792  | 42  | 52  |
|                 | P80315 | T-complex protein 1 subunit delta (TCP-1-delta) (CCT-delta) (A45)                                                                                                    | Cct4 (Cctd)                        | 61   | 59   | 15  | 18  |
|                 | P80313 | T-complex protein 1 subunit eta (TCP-1-eta) (CCT-eta)                                                                                                                | Cct7 (Ccth)                        | 49   | 50   | 11  | 13  |
|                 | Q62446 | FK506-binding protein 3 (EC 5.2.1.8) (Peptidyl-prolyl cis-trans isomerase) (PPIase) (Rotamase) (25 kDa FKBP) (FKBP-25) (Rapamycin-selective 25 kDa immunophilin)     | Fkbp3 (Fkbp25)                     | 31   | 31   | 10  | 11  |
|                 | P07901 | Heat shock protein HSP 90-alpha (HSP 86) (Tumor-specific transplantation 86 kDa antigen) (TSTA)                                                                      | Hsp90aa1 (Hsp86) (Hsp86-1) (Hspca) | 1529 | 2324 | 134 | 146 |
|                 | P38647 | Stress-70 protein, mitochondrial (75 kDa glucose-regulated protein) (GRP 75) (Heat shock 70 kDa protein 9) (Peptide-binding protein 74) (PBP74) (P66 MOT) (Mortalin) | Hspa9 (Grp75) (Hsp74) (Hspa9a)     | 33   | 33   | 12  | 13  |

|        |                                                                                                                                                                                                             |                                    |      |      |     |     |
|--------|-------------------------------------------------------------------------------------------------------------------------------------------------------------------------------------------------------------|------------------------------------|------|------|-----|-----|
| P08113 | Endoplasmic reticulum chaperone protein (Heat shock protein 90 kDa beta member 1) (94 kDa glucose-regulated protein) (GRP94) (ERP99) (Polymorphic tumor rejection antigen 1) (Tumor rejection antigen gp96) | Hsp90b1 (Tra1) (Tra1)              | 221  | 298  | 25  | 27  |
| P11984 | T-complex protein 1 subunit alpha A (TCP-1-alpha) (CCT-alpha) (Tailless complex polypeptide 1A) (TCP-1-A)                                                                                                   | Cct1 (Ccta) (Tcp1)                 | 29   | 66   | 14  | 15  |
| P30416 | FK506-binding protein 4 (EC 5.2.1.8) (Peptidyl-prolyl cis-trans isomerase) (PPIase) (Rotamase) (HSP-binding immunophilin) (HBI) (FKBP52 protein) (52 kDa FK506-binding protein) (FKBP59) (p59 protein)      | Fkbp4                              | 40   | 62   | 8   | 8   |
| P11499 | Heat shock protein HSP 90-beta (HSP 84) (Tumor-specific transplantation 84 kDa antigen) (TSTA)                                                                                                              | Hsp90ab1 (Hsp84) (Hsp84-1) (Hspcb) | 2943 | 3523 | 208 | 205 |
| Q9QZH3 | Peptidyl-prolyl cis-trans isomerase E (PPIase E) (Rotamase E) (EC 5.2.1.8) (Cyclophilin E) (Cyclophilin-33)                                                                                                 | Ppie (Cyp33)                       | 28   | 35   | 10  | 9   |
| Q9D868 | Peptidyl-prolyl cis-trans isomerase H (PPIase H) (Rotamase H) (EC 5.2.1.8)                                                                                                                                  | Ppih                               | 55   | 31   | 7   | 6   |
| Q9CQN1 | Heat shock protein 75 kDa, mitochondrial (HSP 75) (Tumor necrosis factor type 1 receptor-associated protein) (TRAP-1) (TNFR-associated protein 1)                                                           | Trap1 (Hsp75)                      | 197  | 335  | 13  | 11  |
| P20029 | 78 kDa glucose-regulated protein (GRP 78) (Heat shock 70 kDa protein 5) (Immunoglobulin heavy chain-binding protein) (BiP)                                                                                  | Hspa5 (Grp78)                      | 262  | 312  | 25  | 21  |
| P11983 | T-complex protein 1 subunit alpha B (TCP-1-alpha) (CCT-alpha) (Tailless complex polypeptide 1B) (TCP-1-B)                                                                                                   | Cct1 (Ccta) (Tcp1)                 | 29   | 66   | 18  | 15  |
| P80316 | T-complex protein 1 subunit epsilon (TCP-1-epsilon) (CCT-epsilon)                                                                                                                                           | Cct5 (Ccte) (Kiaa0098)             | 239  | 102  | 17  | 14  |

|                               |        |                                                                                                                                                                          |                                    |      |     |     |    |
|-------------------------------|--------|--------------------------------------------------------------------------------------------------------------------------------------------------------------------------|------------------------------------|------|-----|-----|----|
|                               | P16627 | Heat shock 70 kDa protein 1L (Heat shock 70 kDa protein 1-like) (Heat shock 70 kDa-like protein 1) (Spermatid-specific heat shock protein 70)                            | Hspa1l (Hsc70t)                    | 319  | 238 | 33  | 25 |
|                               | Q61696 | Heat shock 70 kDa protein 1A (Heat shock 70 kDa protein 3) (HSP70.3) (Hsp68)                                                                                             | Hspa1a (Hsp70-3) (Hsp70A1)         | 266  | 236 | 33  | 24 |
|                               | Q61699 | Heat shock protein 105 kDa (Heat shock-related 100 kDa protein E7I) (HSP-E7I) (Heat shock 110 kDa protein) (42 degrees C-HSP)                                            | Hsph1 (Hsp105) (Hsp110) (Kiaa0201) | 46   | 48  | 18  | 13 |
|                               | P42932 | T-complex protein 1 subunit theta (TCP-1-theta) (CCT-theta)                                                                                                              | Cct8 (Cctq)                        | 197  | 57  | 23  | 15 |
|                               | P17156 | Heat shock-related 70 kDa protein 2 (Heat shock protein 70.2)                                                                                                            | Hspa2 (Hcp70.2) (Hsp70-2)          | 964  | 544 | 60  | 37 |
|                               | P63038 | 60 kDa heat shock protein, mitochondrial (Heat shock protein 60) (HSP-60) (Hsp60) (60 kDa chaperonin) (Chaperonin 60) (CPN60) (Mitochondrial matrix protein P1) (HSP-65) | Hspd1 (Hsp60)                      | 15   | 32  | 22  | 13 |
|                               | P80317 | T-complex protein 1 subunit zeta (TCP-1-zeta) (CCT-zeta) (CCT-zeta-1)                                                                                                    | Cct6a (Cct6) (Cctz) (Cctz1)        | 160  | 52  | 22  | 13 |
|                               | P63017 | Heat shock cognate 71 kDa protein (Heat shock 70 kDa protein 8)                                                                                                          | Hspa8 (Hsc70) (Hsc73)              | 1719 | 959 | 119 | 70 |
|                               | Q61390 | T-complex protein 1 subunit zeta-2 (TCP-1-zeta-2) (CCT-zeta-2) (Cctz-2)                                                                                                  | Cct6b                              | 55   | 52  | 15  | 8  |
| regulation of gene expression | P97311 | DNA replication licensing factor MCM6 (Mis5 homolog)                                                                                                                     | Mcm6 (Mcmd6) (Mis5)                | 110  | 395 | 20  | 38 |
|                               | P62962 | Profilin-1 (Profilin I)                                                                                                                                                  | Pfn1                               | 30   | 93  | 4   | 7  |

|        |                                                                                                                                                                                                                                          |                                   |     |     |    |    |
|--------|------------------------------------------------------------------------------------------------------------------------------------------------------------------------------------------------------------------------------------------|-----------------------------------|-----|-----|----|----|
| P62960 | Nuclease-sensitive element-binding protein 1 (Y-box-binding protein 1) (Y-box transcription factor) (YB-1) (CCAAT-binding transcription factor I subunit A) (CBF-A) (Enhancer factor I subunit A) (EFI-A) (DNA-binding protein B) (DBPB) | Ybx1 (Msy-1) (Msy1) (Nsep1) (Yb1) | 56  | 126 | 6  | 10 |
| Q6ZWX6 | Eukaryotic translation initiation factor 2 subunit 1 (Eukaryotic translation initiation factor 2 subunit alpha) (eIF-2-alpha) (EIF-2alpha) (EIF-2A)                                                                                      | Eif2s1 (Eif2a)                    | 27  | 177 | 7  | 11 |
| P63158 | High mobility group protein B1 (High mobility group protein 1) (HMG-1)                                                                                                                                                                   | Hmgb1 (Hmg-1) (Hmg1)              | 153 | 405 | 25 | 38 |
| Q8K386 | Ras-related protein Rab-15                                                                                                                                                                                                               | Rab15                             | 44  | 74  | 4  | 6  |
| P12813 | Nuclear receptor subfamily 4 group A member 1 (Orphan nuclear receptor HMR) (Nuclear hormone receptor NUR/77) (N10 nuclear protein)                                                                                                      | Nr4a1 (Gfrp) (Hmr) (N10) (Nur77)  | 61  | 31  | 7  | 10 |
| P68510 | 14-3-3 protein eta                                                                                                                                                                                                                       | Ywhah                             | 707 | 962 | 58 | 80 |
| P70338 | Zinc finger protein Gfi-1 (Growth factor independent protein 1)                                                                                                                                                                          | Gfi1 (Gfi-1)                      | 45  | 39  | 17 | 23 |
| Q61789 | Laminin subunit alpha-3 (Nicein subunit alpha)                                                                                                                                                                                           | Lama3                             | 26  | 26  | 37 | 50 |
| Q5SXJ3 | Fanconi anemia group J protein homolog (Protein FACJ) (EC 3.6.1.-) (ATP-dependent RNA helicase BRIP1) (BRCA1-interacting protein C-terminal helicase 1) (BRCA1-interacting protein 1) (BRCA1-associated C-terminal helicase 1)           | Brip1 (Bach1) (Fancj)             | 25  | 18  | 13 | 17 |
| Q9Z277 | Bromodomain adjacent to zinc finger domain protein 1B (Williams-Beuren syndrome chromosomal region 9 protein homolog) (WBRS9)                                                                                                            | Baz1b (Wbscr9)                    | 43  | 17  | 26 | 34 |

|        |                                                                                                                                                                                                                                                                                                                    |                                  |    |     |     |     |
|--------|--------------------------------------------------------------------------------------------------------------------------------------------------------------------------------------------------------------------------------------------------------------------------------------------------------------------|----------------------------------|----|-----|-----|-----|
| P28271 | Cytoplasmic aconitate hydratase (Aconitase) (EC 4.2.1.3) (Citrate hydro-lyase) (Iron-responsive element-binding protein 1) (IRE-BP 1) (Iron regulatory protein 1) (IRP1)                                                                                                                                           | Aco1 (Ireb1) (Irebp)             | 77 | 122 | 147 | 184 |
| P61028 | Ras-related protein Rab-8B                                                                                                                                                                                                                                                                                         | Rab8b                            | 17 | 59  | 4   | 5   |
| Q811J3 | Iron-responsive element-binding protein 2 (IRE-BP 2) (Iron regulatory protein 2) (IRP2)                                                                                                                                                                                                                            | Ireb2 (Irp2)                     | 69 | 119 | 142 | 176 |
| Q8VII8 | Mineralocorticoid receptor (MR) (Nuclear receptor subfamily 3 group C member 2)                                                                                                                                                                                                                                    | Nr3c2 (Mlr)                      | 28 | 22  | 18  | 22  |
| O35618 | Protein Mdm4 (p53-binding protein Mdm4) (Mdm2-like p53-binding protein) (Protein Mdmx) (Double minute 4 protein)                                                                                                                                                                                                   | Mdm4 (Mdmx)                      | 17 | 29  | 5   | 6   |
| Q60848 | Lymphocyte-specific helicase (EC 3.6.1.-) (Proliferation associated SNF2-like protein)                                                                                                                                                                                                                             | Hells (Lsh) (Pasg)               | 37 | 35  | 10  | 12  |
| P54103 | DnaJ homolog subfamily C member 2 (Zuotin-related factor 1) (Mouse Id associate 1) (MIDA1)                                                                                                                                                                                                                         | Dnajc2 (Mida1) (Zrf1)            | 23 | 27  | 11  | 13  |
| Q61122 | NGFI-A-binding protein 1 (EGR-1-binding protein 1)                                                                                                                                                                                                                                                                 | Nab1                             | 30 | 25  | 6   | 7   |
| P49718 | DNA replication licensing factor MCM5 (CDC46 homolog) (P1-CDC46)                                                                                                                                                                                                                                                   | Mcm5 (Cdc46) (Mcmd5)             | 40 | 20  | 18  | 21  |
| P48754 | Breast cancer type 1 susceptibility protein homolog                                                                                                                                                                                                                                                                | Brca1                            | 28 | 25  | 26  | 30  |
| Q9QWY8 | 130 kDa phosphatidylinositol 4,5-biphosphate-dependent ARF1 GTPase-activating protein (PIP2-dependent ARF1 GAP) (ADP-ribosylation factor-directed GTPase-activating protein 1) (ARF GTPase-activating protein 1) (Development and differentiation-enhancing factor 1) (Differentiation-enhancing factor 1) (DEF-1) | Ddef1 (Asap1) (Kiaa1249) (Shag1) | 26 | 23  | 14  | 16  |
| P55200 | Histone-lysine N-methyltransferase HRX (EC 2.1.1.43) (Zinc finger protein HRX) (ALL-1)                                                                                                                                                                                                                             | Mll (All1) (Hrx) (Mll1)          | 67 | 26  | 39  | 44  |



|        |                                                                                                                                                                                                                                       |                                    |    |    |     |     |
|--------|---------------------------------------------------------------------------------------------------------------------------------------------------------------------------------------------------------------------------------------|------------------------------------|----|----|-----|-----|
| Q9WUF3 | CASP8-associated protein 2 (FLICE-associated huge protein)                                                                                                                                                                            | Casp8ap2 (Flash)                   | 28 | 16 | 26  | 29  |
| P41230 | Histone demethylase JARID1C (EC 1.14.11.-) (Jumonji/ARID domain-containing protein 1C) (Protein SmcX) (Protein Xe169)                                                                                                                 | Jarid1c (Kiaa0234) (Smcx) (Xe169)  | 34 | 32 | 26  | 29  |
| P49717 | DNA replication licensing factor MCM4 (CDC21 homolog) (P1-CDC21)                                                                                                                                                                      | Mcm4 (Cdc21) (Mcmd4)               | 29 | 18 | 11  | 12  |
| Q6P9Z1 | SWI/SNF-related matrix-associated actin-dependent regulator of chromatin subfamily D member 3 (60 kDa BRG-1/Brm-associated factor subunit C) (BRG1-associated factor 60C) (mBAF60c)                                                   | Smarcd3 (Baf60c)                   | 29 | 19 | 46  | 50  |
| P70298 | Homeobox protein cut-like 2 (Cut-like 2) (Homeobox protein Cux-2)                                                                                                                                                                     | Cux2 (Cutl2)                       | 30 | 22 | 12  | 13  |
| Q9Z104 | SWI/SNF-related matrix-associated actin-dependent regulator of chromatin subfamily E member 1-related (SMARCE1-related protein) (HMG box-containing protein 20B) (Structural DNA-binding protein BRAF35) (BRCA2-associated factor 35) | Hmg20b (Braf35) (Hmgx2) (Smarce1r) | 30 | 20 | 14  | 15  |
| Q62504 | Msx2-interacting protein (SPEN homolog) (SMART/HDAC1-associated repressor protein)                                                                                                                                                    | Spen (Kiaa0929) (Mint) (Sharp)     | 27 | 18 | 72  | 75  |
| O35973 | Period circadian protein homolog 1 (Circadian clock protein PERIOD 1) (Circadian pacemaker protein Rigui) (mPER1)                                                                                                                     | Per1 (Per) (Rigui)                 | 29 | 21 | 27  | 28  |
| Q9JM05 | E3 SUMO-protein ligase PIAS4 (Protein inhibitor of activated STAT protein 4) (Protein inhibitor of activated STAT protein gamma) (PIAS-gamma) (PIASy)                                                                                 | Pias4 (Piasg)                      | 26 | 29 | 162 | 165 |
| Q3TXZ1 | Zinc finger protein 575                                                                                                                                                                                                               | Znf575 (Zfp575)                    | 30 | 25 | 5   | 5   |
| Q8VCZ3 | THAP domain-containing protein 7                                                                                                                                                                                                      | Thap7                              | 26 | 18 | 6   | 6   |

|        |                                                                                                                                                                                                              |                                        |    |     |    |    |
|--------|--------------------------------------------------------------------------------------------------------------------------------------------------------------------------------------------------------------|----------------------------------------|----|-----|----|----|
| Q9R190 | Metastasis-associated protein MTA2 (Metastasis-associated 1-like 1)                                                                                                                                          | Mta2 (Mta111)                          | 27 | 26  | 9  | 9  |
| Q9DAI4 | Zinc finger and BTB domain-containing protein 43 (Zinc finger protein 297B)                                                                                                                                  | Zbtb43 (Kiaa0414) (Zfp297b) (Znf297b)  | 23 | 51  | 9  | 9  |
| P25206 | DNA replication licensing factor MCM3 (DNA polymerase alpha holoenzyme-associated protein P1) (P1-MCM3)                                                                                                      | Mcm3 (Mcmd) (Mcmd3)                    | 74 | 185 | 15 | 15 |
| P30681 | High mobility group protein B2 (High mobility group protein 2) (HMG-2)                                                                                                                                       | Hmgb2 (Hmg2)                           | 94 | 222 | 24 | 24 |
| Q91YE5 | Bromodomain adjacent to zinc finger domain protein 2A (Transcription termination factor I-interacting protein 5) (TTF-I-interacting protein 5) (Tip5)                                                        | Baz2a (Tip5)                           | 36 | 15  | 56 | 55 |
| Q8R4B8 | NACHT, LRR and PYD domains-containing protein 3 (Cold autoinflammatory syndrome 1 protein homolog) (Cryopyrin) (PYRIN-containing APAF1-like protein 1) (Mast cell maturation-associated-inducible protein 1) | Nlrp3 (Cias1) (Mmig1) (Nalp3) (Pypaf1) | 30 | 20  | 24 | 23 |
| Q6ZPK0 | PHD finger protein 21A (BRAF35-HDAC complex protein BHC80) (mBHC80) (BHC80a)                                                                                                                                 | Phf21a (Bhc80) (Kiaa1696) (Pftf1)      | 28 | 37  | 20 | 19 |
| P03966 | N-myc proto-oncogene protein                                                                                                                                                                                 | Mycn (Nmyc) (Nmyc1)                    | 65 | 46  | 18 | 17 |
| Q925Q8 | Dachshund homolog 2 (Dach2)                                                                                                                                                                                  | Dach2                                  | 22 | 30  | 9  | 8  |
| Q8BG95 | Protein phosphatase 1 regulatory subunit 12B (Myosin phosphatase-targeting subunit 2)                                                                                                                        | Ppp1r12b (Mypt2)                       | 25 | 24  | 25 | 22 |
| P97784 | Cryptochrome-1                                                                                                                                                                                               | Cry1                                   | 52 | 42  | 21 | 18 |
| Q9R194 | Cryptochrome-2                                                                                                                                                                                               | Cry2 (Kiaa0658)                        | 52 | 42  | 21 | 18 |

|        |                                                                                                                                                                                 |                                               |     |     |    |    |
|--------|---------------------------------------------------------------------------------------------------------------------------------------------------------------------------------|-----------------------------------------------|-----|-----|----|----|
| Q99PP7 | E3 ubiquitin-protein ligase TRIM33 (EC 6.3.2.-)<br>(Tripartite motif-containing protein 33)<br>(Transcription intermediary factor 1-gamma)<br>(TIF1-gamma) (Ectodermin homolog) | Trim33<br>(Kiaa1113)                          | 33  | 25  | 12 | 10 |
| Q6DFV7 | Nuclear receptor coactivator 7                                                                                                                                                  | Ncoa7                                         | 25  | 16  | 11 | 9  |
| Q6ZQ38 | Cullin-associated NEDD8-dissociated protein 1<br>(Cullin-associated and neddylation-dissociated<br>protein 1) (p120 CAND1)                                                      | Cand1<br>(D10Ert516e)<br>(Kiaa0829)           | 221 | 246 | 33 | 27 |
| P42227 | Signal transducer and activator of transcription<br>3 (Acute-phase response factor)                                                                                             | Stat3 (Aprf)                                  | 16  | 28  | 33 | 27 |
| Q9QWL7 | Keratin, type I cytoskeletal 17 (Cytokeratin-17)<br>(CK-17) (Keratin-17) (K17)                                                                                                  | Krt17 (Krt1-17)                               | 38  | 46  | 14 | 11 |
| Q6A078 | Centrosomal protein of 290 kDa (Cep290)<br>(Nephrocystin-6)                                                                                                                     | Cep290<br>(Kiaa0373)<br>(Nphp6)               | 32  | 57  | 85 | 66 |
| Q569Z6 | Thyroid hormone receptor-associated protein<br>3 (Thyroid hormone receptor-associated<br>protein complex 150 kDa component)<br>(Trap150)                                        | Thrap3<br>(Trap150)                           | 29  | 48  | 21 | 16 |
| Q99MY8 | Probable histone-lysine N-methyltransferase<br>ASH1L (EC 2.1.1.43) (Absent small and<br>homeotic disks protein 1 homolog) (ASH1-like<br>protein)                                | Ash1l                                         | 19  | 31  | 46 | 35 |
| P70670 | Nascent polypeptide-associated complex<br>subunit alpha, muscle-specific form (Alpha-<br>NAC, muscle-specific form)                                                             | Naca<br>(Gm1878)                              | 22  | 130 | 29 | 22 |
| P25233 | Necdin                                                                                                                                                                          | Ndn                                           | 30  | 23  | 16 | 12 |
| Q6P3Y5 | Zinc finger protein 280C (Suppressor of hairy<br>wing homolog 3)                                                                                                                | Znf280c<br>(Kiaa1584)<br>(Suhw3)<br>(Zfp280c) | 87  | 142 | 43 | 32 |
| P58681 | Toll-like receptor 7                                                                                                                                                            | Tlr7                                          | 27  | 33  | 23 | 17 |

|        |                                                                                                                                                      |                                                   |     |     |    |    |
|--------|------------------------------------------------------------------------------------------------------------------------------------------------------|---------------------------------------------------|-----|-----|----|----|
| Q61656 | Probable ATP-dependent RNA helicase DDX5 (EC 3.6.1.-) (DEAD box protein 5) (RNA helicase p68) (DEAD box RNA helicase DEAD1) (mDEAD1)                 | Ddx5 (Tnz2)                                       | 90  | 43  | 11 | 8  |
| P62991 | Ubiquitin                                                                                                                                            | Rps27a (Uba80) (Ubcep1); Uba52 (Ubcep2); Ubb; Ubc | 61  | 54  | 11 | 8  |
| Q03172 | Zinc finger protein 40 (Transcription factor alphaA-CRYBP1) (Alpha A-crystallin-binding protein I) (Alpha A-CRYBP1)                                  | Hivep1 (Cryabp1) (Znf40)                          | 25  | 24  | 21 | 15 |
| Q91YJ5 | Translation initiation factor IF-2, mitochondrial (IF-2Mt) (IF2(mt)) (IF-2(Mt))                                                                      | Mtif2                                             | 29  | 23  | 13 | 9  |
| Q6PHN9 | Ras-related protein Rab-35                                                                                                                           | Rab35                                             | 17  | 59  | 3  | 2  |
| Q924W6 | Tripartite motif-containing protein 66 (Transcriptional intermediary factor 1 delta)                                                                 | Trim66 (Tif1d)                                    | 28  | 18  | 23 | 15 |
| Q9QZ09 | Putative homeodomain transcription factor 1                                                                                                          | Phtf1 (Phtf)                                      | 29  | 24  | 8  | 5  |
| O88291 | Zinc finger protein 326 (Zinc finger protein-associated with nuclear matrix of 75 kDa)                                                               | Znf326 (Zan75) (Zfp326)                           | 41  | 55  | 5  | 3  |
| Q6NZJ6 | Eukaryotic translation initiation factor 4 gamma 1 (eIF-4-gamma 1) (eIF-4G 1) (eIF-4G1)                                                              | Eif4g1                                            | 47  | 113 | 30 | 18 |
| P53762 | Aryl hydrocarbon receptor nuclear translocator (ARNT protein) (Dioxin receptor, nuclear translocator) (Hypoxia-inducible factor 1 beta) (HIF-1 beta) | Arnt                                              | 25  | 22  | 7  | 4  |
| Q9R1X4 | Protein timeless homolog (mTim)                                                                                                                      | Timeless (Tim1) (Timeless1)                       | 22  | 25  | 16 | 9  |
| P63073 | Eukaryotic translation initiation factor 4E (eIF-4E) (eIF4E) (mRNA cap-binding protein) (eIF-4F 25 kDa subunit)                                      | Eif4e                                             | 110 | 25  | 9  | 5  |

|                                 |        |                                                                                                                                                                                                                                          |                                   |     |      |    |     |
|---------------------------------|--------|------------------------------------------------------------------------------------------------------------------------------------------------------------------------------------------------------------------------------------------|-----------------------------------|-----|------|----|-----|
|                                 | Q8BYH8 | Chromodomain-helicase-DNA-binding protein 9 (CHD-9) (EC 3.6.1.-) (ATP-dependent helicase CHD9) (Peroxisomal proliferator-activated receptor A-interacting complex 320 kDa protein) (PPAR-alpha-interacting complex protein 320 kDa)      | Chd9 (Kiaa0308) (Pric320)         | 39  | 27   | 49 | 27  |
|                                 | O35664 | Interferon-alpha/beta receptor beta chain (Interferon alpha/beta receptor 2) (IFN-alpha-REC) (Type I interferon receptor) (IFN-R)                                                                                                        | Ifnar2                            | 37  | 21   | 11 | 6   |
| regulation of metabolic process | P97311 | DNA replication licensing factor MCM6 (Mis5 homolog)                                                                                                                                                                                     | Mcm6 (Mcmd6) (Mis5)               | 110 | 395  | 20 | 38  |
|                                 | P62962 | Profilin-1 (Profilin I)                                                                                                                                                                                                                  | Pfn1                              | 30  | 93   | 4  | 7   |
|                                 | P18760 | Cofilin-1 (Cofilin, non-muscle isoform)                                                                                                                                                                                                  | Cfl1                              | 959 | 2552 | 70 | 122 |
|                                 | P62960 | Nuclease-sensitive element-binding protein 1 (Y-box-binding protein 1) (Y-box transcription factor) (YB-1) (CCAAT-binding transcription factor I subunit A) (CBF-A) (Enhancer factor I subunit A) (EFI-A) (DNA-binding protein B) (DBPB) | Ybx1 (Msy-1) (Msy1) (Nsep1) (Yb1) | 56  | 126  | 6  | 10  |
|                                 | Q6ZWX6 | Eukaryotic translation initiation factor 2 subunit 1 (Eukaryotic translation initiation factor 2 subunit alpha) (eIF-2-alpha) (EIF-2alpha) (EIF-2A)                                                                                      | Eif2s1 (Eif2a)                    | 27  | 177  | 7  | 11  |
|                                 | P63001 | Ras-related C3 botulinum toxin substrate 1 (p21-Rac1)                                                                                                                                                                                    | Rac1                              | 31  | 99   | 7  | 11  |
|                                 | P63158 | High mobility group protein B1 (High mobility group protein 1) (HMG-1)                                                                                                                                                                   | Hmgb1 (Hmg-1) (Hmg1)              | 153 | 405  | 25 | 38  |
|                                 | Q8K386 | Ras-related protein Rab-15                                                                                                                                                                                                               | Rab15                             | 44  | 74   | 4  | 6   |
|                                 | P12813 | Nuclear receptor subfamily 4 group A member 1 (Orphan nuclear receptor HMR) (Nuclear hormone receptor NUR/77) (N10 nuclear protein)                                                                                                      | Nr4a1 (Gfrp) (Hmr) (N10) (Nur77)  | 61  | 31   | 7  | 10  |
|                                 | P68510 | 14-3-3 protein eta                                                                                                                                                                                                                       | Ywhah                             | 707 | 962  | 58 | 80  |
|                                 | P70338 | Zinc finger protein Gfi-1 (Growth factor independent protein 1)                                                                                                                                                                          | Gfi1 (Gfi-1)                      | 45  | 39   | 17 | 23  |

|        |                                                                                                                                                                                                                                |                       |    |     |     |     |
|--------|--------------------------------------------------------------------------------------------------------------------------------------------------------------------------------------------------------------------------------|-----------------------|----|-----|-----|-----|
| Q61789 | Laminin subunit alpha-3 (Nicein subunit alpha)                                                                                                                                                                                 | Lama3                 | 26 | 26  | 37  | 50  |
| Q5SXJ3 | Fanconi anemia group J protein homolog (Protein FACJ) (EC 3.6.1.-) (ATP-dependent RNA helicase BRIP1) (BRCA1-interacting protein C-terminal helicase 1) (BRCA1-interacting protein 1) (BRCA1-associated C-terminal helicase 1) | Brip1 (Bach1) (Fancj) | 25 | 18  | 13  | 17  |
| Q9Z277 | Bromodomain adjacent to zinc finger domain protein 1B (Williams-Beuren syndrome chromosomal region 9 protein homolog) (WBRS9)                                                                                                  | Baz1b (Wbscr9)        | 43 | 17  | 26  | 34  |
| P47753 | F-actin-capping protein subunit alpha-1 (CapZ alpha-1)                                                                                                                                                                         | Capza1 (Cappa1)       | 60 | 33  | 7   | 9   |
| P28271 | Cytoplasmic aconitate hydratase (Aconitase) (EC 4.2.1.3) (Citrate hydro-lyase) (Iron-responsive element-binding protein 1) (IRE-BP 1) (Iron regulatory protein 1) (IRP1)                                                       | Aco1 (Ireb1) (Irebp)  | 77 | 122 | 147 | 184 |
| P61028 | Ras-related protein Rab-8B                                                                                                                                                                                                     | Rab8b                 | 17 | 59  | 4   | 5   |
| Q811J3 | Iron-responsive element-binding protein 2 (IRE BP 2) (Iron regulatory protein 2) (IRP2)                                                                                                                                        | Ireb2 (Irp2)          | 69 | 119 | 142 | 176 |
| Q8VII8 | Mineralocorticoid receptor (MR) (Nuclear receptor subfamily 3 group C member 2)                                                                                                                                                | Nr3c2 (Mlr)           | 28 | 22  | 18  | 22  |
| P47754 | F-actin-capping protein subunit alpha-2 (CapZ alpha-2)                                                                                                                                                                         | Capza2 (Cappa2)       | 60 | 33  | 5   | 6   |
| O35618 | Protein Mdm4 (p53-binding protein Mdm4) (Mdm2-like p53-binding protein) (Protein Mdmx) (Double minute 4 protein)                                                                                                               | Mdm4 (Mdmx)           | 17 | 29  | 5   | 6   |
| Q60848 | Lymphocyte-specific helicase (EC 3.6.1.-) (Proliferation associated SNF2-like protein)                                                                                                                                         | Hells (Lsh) (Pasg)    | 37 | 35  | 10  | 12  |
| O08908 | Phosphatidylinositol 3-kinase regulatory subunit beta (PI3-kinase p85 subunit beta) (PtdIns-3-kinase p85-beta)                                                                                                                 | Pik3r2                | 19 | 25  | 20  | 24  |

|        |                                                                                                                                                                                                                                                                                                                    |                                   |    |     |    |    |
|--------|--------------------------------------------------------------------------------------------------------------------------------------------------------------------------------------------------------------------------------------------------------------------------------------------------------------------|-----------------------------------|----|-----|----|----|
| P54103 | DnaJ homolog subfamily C member 2 (Zuotin-related factor 1) (Mouse Id associate 1) (MIDA1)                                                                                                                                                                                                                         | Dnajc2 (Mida1) (Zrf1)             | 23 | 27  | 11 | 13 |
| Q61122 | NGFI-A-binding protein 1 (EGR-1-binding protein 1)                                                                                                                                                                                                                                                                 | Nab1                              | 30 | 25  | 6  | 7  |
| P49718 | DNA replication licensing factor MCM5 (CDC46 homolog) (P1-CDC46)                                                                                                                                                                                                                                                   | Mcm5 (Cdc46) (Mcmd5)              | 40 | 20  | 18 | 21 |
| P48754 | Breast cancer type 1 susceptibility protein homolog                                                                                                                                                                                                                                                                | Brca1                             | 28 | 25  | 26 | 30 |
| Q62418 | Drebrin-like protein (SH3 domain-containing protein 7) (Actin-binding protein 1)                                                                                                                                                                                                                                   | Dbnl (Abp1) (Sh3p7)               | 24 | 39  | 7  | 8  |
| Q9QWY8 | 130 kDa phosphatidylinositol 4,5-biphosphate-dependent ARF1 GTPase-activating protein (PIP2-dependent ARF1 GAP) (ADP-ribosylation factor-directed GTPase-activating protein 1) (ARF GTPase-activating protein 1) (Development and differentiation-enhancing factor 1) (Differentiation-enhancing factor 1) (DEF-1) | Ddef1 (Asap1) (Kiaa1249) (Shag1)  | 26 | 23  | 14 | 16 |
| P55200 | Histone-lysine N-methyltransferase HRX (EC 2.1.1.43) (Zinc finger protein HRX) (ALL-1)                                                                                                                                                                                                                             | Mll (All1) (Hrx) (Mll1)           | 67 | 26  | 39 | 44 |
| Q9WUF3 | CASP8-associated protein 2 (FLICE-associated huge protein)                                                                                                                                                                                                                                                         | Casp8ap2 (Flash)                  | 28 | 16  | 26 | 29 |
| Q64467 | Glyceraldehyde-3-phosphate dehydrogenase, testis-specific (EC 1.2.1.12) (Spermatogenic glyceraldehyde-3-phosphate dehydrogenase) (Spermatogenic cell-specific glyceraldehyde 3-phosphate dehydrogenase 2) (GAPDH-2)                                                                                                | Gapdhs (Gapds) (Gapds)            | 75 | 781 | 26 | 29 |
| P41230 | Histone demethylase JARID1C (EC 1.14.11.-) (Jumonji/ARID domain-containing protein 1C) (Protein SmcX) (Protein Xe169)                                                                                                                                                                                              | Jarid1c (Kiaa0234) (Smcx) (Xe169) | 34 | 32  | 26 | 29 |

|        |                                                                                                                                                                                                                                       |                                    |      |      |     |     |
|--------|---------------------------------------------------------------------------------------------------------------------------------------------------------------------------------------------------------------------------------------|------------------------------------|------|------|-----|-----|
| P49717 | DNA replication licensing factor MCM4 (CDC21 homolog) (P1-CDC21)                                                                                                                                                                      | Mcm4 (Cdc21) (Mcmd4)               | 29   | 18   | 11  | 12  |
| P27546 | Microtubule-associated protein 4 (MAP-4)                                                                                                                                                                                              | Map4 (Mtap4)                       | 94   | 41   | 33  | 36  |
| P07901 | Heat shock protein HSP 90-alpha (HSP 86) (Tumor-specific transplantation 86 kDa antigen) (TSTA)                                                                                                                                       | Hsp90aa1 (Hsp86) (Hsp86-1) (Hspca) | 1529 | 2324 | 134 | 146 |
| Q6P9Z1 | SWI/SNF-related matrix-associated actin-dependent regulator of chromatin subfamily D member 3 (60 kDa BRG-1/Brm-associated factor subunit C) (BRG1-associated factor 60C) (mBAF60c)                                                   | Smarcd3 (Baf60c)                   | 29   | 19   | 46  | 50  |
| P70298 | Homeobox protein cut-like 2 (Cut-like 2) (Homeobox protein Cux-2)                                                                                                                                                                     | Cux2 (Cutl2)                       | 30   | 22   | 12  | 13  |
| Q9Z104 | SWI/SNF-related matrix-associated actin-dependent regulator of chromatin subfamily E member 1-related (SMARCE1-related protein) (HMG box-containing protein 20B) (Structural DNA-binding protein BRAF35) (BRCA2-associated factor 35) | Hmg20b (Braf35) (Hmgx2) (Smarce1r) | 30   | 20   | 14  | 15  |
| P16546 | Spectrin alpha chain, brain (Spectrin, non-erythroid alpha chain) (Alpha-II spectrin) (Fodrin alpha chain)                                                                                                                            | Sptan1 (Spna2) (Spta2)             | 68   | 86   | 66  | 69  |
| Q62504 | Msx2-interacting protein (SPEN homolog) (SMART/HDAC1-associated repressor protein)                                                                                                                                                    | Spen (Kiaa0929) (Mint) (Sharp)     | 27   | 18   | 72  | 75  |
| O35973 | Period circadian protein homolog 1 (Circadian clock protein PERIOD 1) (Circadian pacemaker protein Rigui) (mPER1)                                                                                                                     | Per1 (Per) (Rigui)                 | 29   | 21   | 27  | 28  |
| Q9JM05 | E3 SUMO-protein ligase PIAS4 (Protein inhibitor of activated STAT protein 4) (Protein inhibitor of activated STAT protein gamma) (PIAS-gamma) (PIASy)                                                                                 | Pias4 (Piasg)                      | 26   | 29   | 162 | 165 |



|        |                                                                                                                                                                                                                           |                                                 |      |      |     |     |
|--------|---------------------------------------------------------------------------------------------------------------------------------------------------------------------------------------------------------------------------|-------------------------------------------------|------|------|-----|-----|
| Q3TXZ1 | Zinc finger protein 575                                                                                                                                                                                                   | Znf575<br>(Zfp575)                              | 30   | 25   | 5   | 5   |
| Q8VCZ3 | THAP domain-containing protein 7                                                                                                                                                                                          | Thap7                                           | 26   | 18   | 6   | 6   |
| Q9R190 | Metastasis-associated protein MTA2<br>(Metastasis-associated 1-like 1)                                                                                                                                                    | Mta2 (Mta111)                                   | 27   | 26   | 9   | 9   |
| Q9DAI4 | Zinc finger and BTB domain-containing protein<br>43 (Zinc finger protein 297B)                                                                                                                                            | Zbtb43<br>(Kiaa0414)<br>(Zfp297b)<br>(Znf297b)  | 23   | 51   | 9   | 9   |
| P25206 | DNA replication licensing factor MCM3 (DNA<br>polymerase alpha holoenzyme-associated<br>protein P1) (P1-MCM3)                                                                                                             | Mcm3 (Mcmd)<br>(Mcmd3)                          | 74   | 185  | 15  | 15  |
| Q01098 | Glutamate [NMDA] receptor subunit epsilon-3<br>(N-methyl D-aspartate receptor subtype 2C)<br>(NMDAR2C) (NR2C)                                                                                                             | Grin2c                                          | 18   | 33   | 15  | 15  |
| P30681 | High mobility group protein B2 (High mobility<br>group protein 2) (HMG-2)                                                                                                                                                 | Hmgb2<br>(Hmg2)                                 | 94   | 222  | 24  | 24  |
| Q62261 | Spectrin beta chain, brain 1 (Spectrin, non-<br>erythroid beta chain 1) (Beta-II spectrin)<br>(Fodrin beta chain) (Embryonic liver fodrin)                                                                                | Sptbn1 (Elf)<br>(Spnb-2)<br>(Spnb2)<br>(Sptb2)  | 56   | 54   | 48  | 48  |
| P11499 | Heat shock protein HSP 90-beta (HSP 84)<br>(Tumor-specific transplantation 84 kDa<br>antigen) (TSTA)                                                                                                                      | Hsp90ab1<br>(Hsp84)<br>(Hsp84-1)<br>(Hspcb)     | 2943 | 3523 | 208 | 205 |
| Q91YE5 | Bromodomain adjacent to zinc finger domain<br>protein 2A (Transcription termination factor I-<br>interacting protein 5) (TTF-I-interacting protein<br>5) (Tip5)                                                           | Baz2a (Tip5)                                    | 36   | 15   | 56  | 55  |
| Q8R4B8 | NACHT, LRR and PYD domains-containing<br>protein 3 (Cold autoinflammatory syndrome 1<br>protein homolog) (Cryopyrin) (PYRIN-<br>containing APAF1-like protein 1) (Mast cell<br>maturation-associated-inducible protein 1) | Nlrp3 (Cias1)<br>(Mmig1)<br>(Nalp3)<br>(Pypaf1) | 30   | 20   | 24  | 23  |

|        |                                                                                                                                                                        |                                   |     |     |    |    |
|--------|------------------------------------------------------------------------------------------------------------------------------------------------------------------------|-----------------------------------|-----|-----|----|----|
| Q6ZPK0 | PHD finger protein 21A (BRAF35-HDAC complex protein BHC80) (mBHC80) (BHC80a)                                                                                           | Phf21a (Bhc80) (Kiaa1696) (Pftf1) | 28  | 37  | 20 | 19 |
| P03966 | N-myc proto-oncogene protein                                                                                                                                           | Mycn (Nmyc) (Nmyc1)               | 65  | 46  | 18 | 17 |
| Q925Q8 | Dachshund homolog 2 (Dach2)                                                                                                                                            | Dach2                             | 22  | 30  | 9  | 8  |
| Q8BG95 | Protein phosphatase 1 regulatory subunit 12B (Myosin phosphatase-targeting subunit 2)                                                                                  | Ppp1r12b (Mypt2)                  | 25  | 24  | 25 | 22 |
| Q9R0P5 | Destrin (Actin-depolymerizing factor) (ADF) (Sid 23)                                                                                                                   | Dstn (Dsn) (Sid23)                | 61  | 81  | 8  | 7  |
| P97784 | Cryptochrome-1                                                                                                                                                         | Cry1                              | 52  | 42  | 21 | 18 |
| Q9R194 | Cryptochrome-2                                                                                                                                                         | Cry2 (Kiaa0658)                   | 52  | 42  | 21 | 18 |
| Q99PP7 | E3 ubiquitin-protein ligase TRIM33 (EC 6.3.2.-) (Tripartite motif-containing protein 33) (Transcription intermediary factor 1-gamma) (TIF1-gamma) (Ectodermin homolog) | Trim33 (Kiaa1113)                 | 33  | 25  | 12 | 10 |
| P20357 | Microtubule-associated protein 2 (MAP-2)                                                                                                                               | Map2 (Mtap2)                      | 50  | 22  | 30 | 25 |
| Q6DFV7 | Nuclear receptor coactivator 7                                                                                                                                         | Ncoa7                             | 25  | 16  | 11 | 9  |
| Q6ZQ38 | Cullin-associated NEDD8-dissociated protein 1 (Cullin-associated and neddylation-dissociated protein 1) (p120 CAND1)                                                   | Cand1 (D10Ert516e) (Kiaa0829)     | 221 | 246 | 33 | 27 |
| P42227 | Signal transducer and activator of transcription 3 (Acute-phase response factor)                                                                                       | Stat3 (Aprf)                      | 16  | 28  | 33 | 27 |
| Q9QWL7 | Keratin, type I cytoskeletal 17 (Cytokeratin-17) (CK-17) (Keratin-17) (K17)                                                                                            | Krt17 (Krt1-17)                   | 38  | 46  | 14 | 11 |
| Q6A078 | Centrosomal protein of 290 kDa (Cep290) (Nephrocystin-6)                                                                                                               | Cep290 (Kiaa0373) (Nphp6)         | 32  | 57  | 85 | 66 |

|        |                                                                                                                                         |                                                   |    |     |    |    |
|--------|-----------------------------------------------------------------------------------------------------------------------------------------|---------------------------------------------------|----|-----|----|----|
| Q569Z6 | Thyroid hormone receptor-associated protein 3 (Thyroid hormone receptor-associated protein complex 150 kDa component) (Trap150)         | Thrap3 (Trap150)                                  | 29 | 48  | 21 | 16 |
| Q99MY8 | Probable histone-lysine N-methyltransferase ASH1L (EC 2.1.1.43) (Absent small and homeotic disks protein 1 homolog) (ASH1-like protein) | Ash1l                                             | 19 | 31  | 46 | 35 |
| P70670 | Nascent polypeptide-associated complex subunit alpha, muscle-specific form (Alpha-NAC, muscle-specific form)                            | Naca (Gm1878)                                     | 22 | 130 | 29 | 22 |
| P25233 | Necdin                                                                                                                                  | Ndn                                               | 30 | 23  | 16 | 12 |
| Q6P3Y5 | Zinc finger protein 280C (Suppressor of hairy wing homolog 3)                                                                           | Znf280c (Kiaa1584) (Suhw3) (Zfp280c)              | 87 | 142 | 43 | 32 |
| P58681 | Toll-like receptor 7                                                                                                                    | Tlr7                                              | 27 | 33  | 23 | 17 |
| Q61656 | Probable ATP-dependent RNA helicase DDX5 (EC 3.6.1.-) (DEAD box protein 5) (RNA helicase p68) (DEAD box RNA helicase DEAD1) (mDEAD1)    | Ddx5 (Tnz2)                                       | 90 | 43  | 11 | 8  |
| P62991 | Ubiquitin                                                                                                                               | Rps27a (Uba80) (Ubcep1); Uba52 (Ubcep2); Ubb; Ubc | 61 | 54  | 11 | 8  |
| Q03172 | Zinc finger protein 40 (Transcription factor alphaA-CRYBP1) (Alpha A-crystallin-binding protein I) (Alpha A-CRYBP1)                     | Hivep1 (Cryabp1) (Znf40)                          | 25 | 24  | 21 | 15 |
| Q91YJ5 | Translation initiation factor IF-2, mitochondrial (IF-2Mt) (IF2(mt)) (IF-2(Mt))                                                         | Mtif2                                             | 29 | 23  | 13 | 9  |
| Q6PHN9 | Ras-related protein Rab-35                                                                                                              | Rab35                                             | 17 | 59  | 3  | 2  |
| Q8K4L3 | Supervillin (Archvillin) (p205/p250)                                                                                                    | Svil                                              | 25 | 22  | 18 | 12 |
| Q924W6 | Tripartite motif-containing protein 66 (Transcriptional intermediary factor 1 delta)                                                    | Trim66 (Tif1d)                                    | 28 | 18  | 23 | 15 |

|                                              |                                                                                                                                                                                                                                     |                             |       |               |               |                 |                 |
|----------------------------------------------|-------------------------------------------------------------------------------------------------------------------------------------------------------------------------------------------------------------------------------------|-----------------------------|-------|---------------|---------------|-----------------|-----------------|
| Q9QZ09                                       | Putative homeodomain transcription factor 1                                                                                                                                                                                         | Phtf1 (Phtf)                | 29    | 24            | 8             | 5               |                 |
| O88291                                       | Zinc finger protein 326 (Zinc finger protein-associated with nuclear matrix of 75 kDa)                                                                                                                                              | Znf326 (Zan75) (Zfp326)     | 41    | 55            | 5             | 3               |                 |
| Q6NZJ6                                       | Eukaryotic translation initiation factor 4 gamma 1 (eIF-4-gamma 1) (eIF-4G 1) (eIF-4G1)                                                                                                                                             | Eif4g1                      | 47    | 113           | 30            | 18              |                 |
| P53762                                       | Aryl hydrocarbon receptor nuclear translocator (ARNT protein) (Dioxin receptor, nuclear translocator) (Hypoxia-inducible factor 1 beta) (HIF-1 beta)                                                                                | Arnt                        | 25    | 22            | 7             | 4               |                 |
| P47757                                       | F-actin-capping protein subunit beta (CapZ beta)                                                                                                                                                                                    | Capzb (Cappb1)              | 107   | 68            | 7             | 4               |                 |
| P26043                                       | Radixin (ESP10)                                                                                                                                                                                                                     | Rdx                         | 127   | 106           | 23            | 13              |                 |
| Q9R1X4                                       | Protein timeless homolog (mTim)                                                                                                                                                                                                     | Timeless (Tim1) (Timeless1) | 22    | 25            | 16            | 9               |                 |
| P63073                                       | Eukaryotic translation initiation factor 4E (eIF-4E) (eIF4E) (mRNA cap-binding protein) (eIF-4F 25 kDa subunit)                                                                                                                     | Eif4e                       | 110   | 25            | 9             | 5               |                 |
| Q8BYH8                                       | Chromodomain-helicase-DNA-binding protein 9 (CHD-9) (EC 3.6.1.-) (ATP-dependent helicase CHD9) (Peroxisomal proliferator-activated receptor A-interacting complex 320 kDa protein) (PPAR-alpha-interacting complex protein 320 kDa) | Chd9 (Kiaa0308) (Pric320)   | 39    | 27            | 49            | 27              |                 |
| P17918                                       | Proliferating cell nuclear antigen (PCNA) (Cyclin)                                                                                                                                                                                  | Pcna                        | 273   | 207           | 20            | 11              |                 |
| O35664                                       | Interferon-alpha/beta receptor beta chain (Interferon alpha/beta receptor 2) (IFN-alpha-REC) (Type I interferon receptor) (IFN-R)                                                                                                   | Ifnar2                      | 37    | 21            | 11            | 6               |                 |
|                                              |                                                                                                                                                                                                                                     |                             |       |               |               |                 |                 |
| Enriched Molecular Function by Gene Ontology |                                                                                                                                                                                                                                     |                             |       |               |               |                 |                 |
| Term                                         | Accession                                                                                                                                                                                                                           | Protein names               | Genes | prot_score_WT | prot_score_KO | prot_matches_WT | prot_matches_KO |

|                               |                                                                                                                                                      |                                                                                                                                                                          |                     |     |     |    |    |
|-------------------------------|------------------------------------------------------------------------------------------------------------------------------------------------------|--------------------------------------------------------------------------------------------------------------------------------------------------------------------------|---------------------|-----|-----|----|----|
| adenyl ribonucleotide binding | P97311                                                                                                                                               | DNA replication licensing factor MCM6 (Mis5 homolog)                                                                                                                     | Mcm6 (Mcmd6) (Mis5) | 110 | 395 | 20 | 38 |
|                               | O88705                                                                                                                                               | Potassium/sodium hyperpolarization-activated cyclic nucleotide-gated channel 3 (Hyperpolarization-activated cation channel 3) (HAC-3)                                    | Hcn3 (Hac3)         | 75  | 67  | 8  | 15 |
|                               | Q8BYC6                                                                                                                                               | Serine/threonine-protein kinase TAO3 (EC 2.7.11.1) (Thousand and one amino acid protein 3)                                                                               | Taok3               | 32  | 38  | 9  | 16 |
|                               | Q9R117                                                                                                                                               | Non-receptor tyrosine-protein kinase TYK2 (EC 2.7.10.2)                                                                                                                  | Tyk2                | 27  | 30  | 15 | 26 |
|                               | Q9Z129                                                                                                                                               | ATP-dependent DNA helicase Q1 (EC 3.6.1.-) (DNA-dependent ATPase Q1)                                                                                                     | Recql (Recql1)      | 17  | 27  | 13 | 22 |
|                               | P15532                                                                                                                                               | Nucleoside diphosphate kinase A (NDP kinase A) (NDK A) (EC 2.7.4.6) (Tumor metastatic process-associated protein) (Metastasis inhibition factor NM23) (NDPK-A) (nm23-M1) | Nme1 (Nm23)         | 150 | 261 | 8  | 13 |
|                               | Q501J6                                                                                                                                               | Probable ATP-dependent RNA helicase DDX17 (EC 3.6.1.-) (DEAD box protein 17)                                                                                             | Ddx17               | 90  | 43  | 7  | 11 |
|                               | Q9Z1S0                                                                                                                                               | Mitotic checkpoint serine/threonine-protein kinase BUB1 beta (EC 2.7.11.1) (MAD3/BUB1-related protein kinase) (Mitotic checkpoint kinase MAD3L)                          | Bub1b (Mad3l)       | 20  | 41  | 15 | 23 |
|                               | P83741                                                                                                                                               | Serine/threonine-protein kinase WNK1 (EC 2.7.11.1) (Protein kinase with no lysine 1) (Protein kinase, lysine-deficient 1)                                                | Wnk1 (Prkwnk1)      | 56  | 36  | 18 | 27 |
|                               | P35761                                                                                                                                               | Dual specificity protein kinase TTK (ESK) (PYT) (EC 2.7.12.1)                                                                                                            | Ttk (Esk)           | 14  | 34  | 9  | 13 |
| Q00342                        | FL cytokine receptor (EC 2.7.10.1) (Tyrosine-protein kinase receptor flk-2) (Fetal liver kinase 2) (Tyrosine-protein kinase FLT3) (CD antigen CD135) | Flt3 (Flk-2) (Flt3)                                                                                                                                                      | 17                  | 34  | 7   | 10 |    |

|        |                                                                                                                                                                                                                                                       |                        |     |     |    |    |
|--------|-------------------------------------------------------------------------------------------------------------------------------------------------------------------------------------------------------------------------------------------------------|------------------------|-----|-----|----|----|
| Q9Z1F9 | SUMO-activating enzyme subunit 2 (EC 6.3.2.-) (Ubiquitin-like 1-activating enzyme E1B) (Anthracycline-associated resistance ARX)                                                                                                                      | Uba2 (Sae2) (Uble1b)   | 62  | 77  | 10 | 14 |
| P17047 | Lysosome-associated membrane glycoprotein 2 (LAMP-2) (Lysosomal membrane glycoprotein type B) (LGP-B) (CD107 antigen-like family member B) (CD antigen CD107b)                                                                                        | Lamp2 (Lamp-2)         | 26  | 29  | 8  | 11 |
| P27641 | ATP-dependent DNA helicase 2 subunit 2 (EC 3.6.1.-) (ATP-dependent DNA helicase II 80 kDa subunit) (Ku autoantigen protein p86 homolog) (Ku80) (CTC box-binding factor 85 kDa subunit) (CTCBF) (CTC85) (Nuclear factor IV) (DNA repair protein XRCC5) | Xrcc5 (G22p2)          | 22  | 29  | 16 | 22 |
| P70296 | Phosphatidylethanolamine-binding protein 1 (PEBP-1) (HCNPPp) [Cleaved into: Hippocampal cholinergic neurostimulating peptide (HCNP)]                                                                                                                  | Pebp1 (Pbp) (Pebp)     | 532 | 730 | 25 | 33 |
| Q5SXJ3 | Fanconi anemia group J protein homolog (Protein FACJ) (EC 3.6.1.-) (ATP-dependent RNA helicase BRIP1) (BRCA1-interacting protein C-terminal helicase 1) (BRCA1-interacting protein 1) (BRCA1-associated C-terminal helicase 1)                        | Brip1 (Bach1) (Fancj)  | 25  | 18  | 13 | 17 |
| Q61846 | Maternal embryonic leucine zipper kinase (EC 2.7.11.1) (Protein kinase PK38) (mPK38)                                                                                                                                                                  | Melk (Kiaa0175) (Pk38) | 28  | 32  | 10 | 13 |
| Q61496 | Probable ATP-dependent RNA helicase DDX4 (EC 3.6.1.-) (DEAD box protein 4) (Vasa homolog) (Mvh)                                                                                                                                                       | Ddx4 (Vasa)            | 17  | 25  | 44 | 56 |
| P61028 | Ras-related protein Rab-8B                                                                                                                                                                                                                            | Rab8b                  | 17  | 59  | 4  | 5  |
| Q61316 | Heat shock 70 kDa protein 4 (Heat shock 70-related protein APG-2)                                                                                                                                                                                     | Hspa4 (Apg2) (Hsp110)  | 379 | 792 | 42 | 52 |

|        |                                                                                                                                                                                     |                      |    |    |     |     |
|--------|-------------------------------------------------------------------------------------------------------------------------------------------------------------------------------------|----------------------|----|----|-----|-----|
| Q8BU30 | Isoleucyl-tRNA synthetase, cytoplasmic (EC 6.1.1.5) (Isoleucine--tRNA ligase) (IleRS) (IRS)                                                                                         | Iars                 | 85 | 46 | 30  | 37  |
| O08648 | Mitogen-activated protein kinase kinase kinase 4 (EC 2.7.11.25) (MAPK/ERK kinase kinase 4) (MEK kinase 4) (MEKK 4)                                                                  | Map3k4 (Mekk4)       | 37 | 16 | 19  | 23  |
| P49025 | Citron Rho-interacting kinase (CRIK) (EC 2.7.11.1) (Rho-interacting, serine/threonine-protein kinase 21)                                                                            | Cit                  | 49 | 67 | 67  | 81  |
| Q60848 | Lymphocyte-specific helicase (EC 3.6.1.-) (Proliferation associated SNF2-like protein)                                                                                              | Hells (Lsh) (Pasg)   | 37 | 35 | 10  | 12  |
| P80315 | T-complex protein 1 subunit delta (TCP-1-delta) (CCT-delta) (A45)                                                                                                                   | Cct4 (Cctd)          | 61 | 59 | 15  | 18  |
| Q60575 | Kinesin-like protein KIF1B                                                                                                                                                          | Kif1b                | 45 | 95 | 30  | 36  |
| Q61771 | Kinesin-like protein KIF3B (Microtubule plus end-directed kinesin motor 3B)                                                                                                         | Kif3b                | 30 | 51 | 16  | 19  |
| Q9R0K7 | Plasma membrane calcium-transporting ATPase 2 (PMCA2) (EC 3.6.3.8) (Plasma membrane calcium ATPase isoform 2) (Plasma membrane calcium pump isoform 2)                              | Atp2b2 (Pmca2)       | 32 | 27 | 70  | 83  |
| P80313 | T-complex protein 1 subunit eta (TCP-1-eta) (CCT-eta)                                                                                                                               | Cct7 (Ccth)          | 49 | 50 | 11  | 13  |
| P49718 | DNA replication licensing factor MCM5 (CDC46 homolog) (P1-CDC46)                                                                                                                    | Mcm5 (Cdc46) (Mcmd5) | 40 | 20 | 18  | 21  |
| P97820 | Mitogen-activated protein kinase kinase kinase 4 (EC 2.7.11.1) (MAPK/ERK kinase kinase kinase 4) (MEK kinase kinase 4) (MEKKK 4) (HPK/GCK-like kinase HGK) (Nck-interacting kinase) | Map4k4 (Nik)         | 65 | 54 | 15  | 17  |
| P26618 | Alpha-type platelet-derived growth factor receptor (EC 2.7.10.1) (PDGF-R-alpha) (CD140 antigen-like family member A) (CD antigen CD140a)                                            | Pdgfra               | 37 | 73 | 160 | 178 |

|        |                                                                                                                                                                                                                                       |                                    |      |      |     |     |
|--------|---------------------------------------------------------------------------------------------------------------------------------------------------------------------------------------------------------------------------------------|------------------------------------|------|------|-----|-----|
| P49717 | DNA replication licensing factor MCM4 (CDC21 homolog) (P1-CDC21)                                                                                                                                                                      | Mcm4 (Cdc21) (Mcmd4)               | 29   | 18   | 11  | 12  |
| Q3THS6 | S-adenosylmethionine synthetase isoform type 2 (AdoMet synthetase 2) (EC 2.5.1.6) (Methionine adenosyltransferase 2)                                                                                                                  | Mat2a                              | 26   | 42   | 11  | 12  |
| Q99KK9 | Probable histidyl-tRNA synthetase, mitochondrial (EC 6.1.1.21) (Histidine--tRNA ligase) (HisRS) (Histidine--tRNA ligase-like)                                                                                                         | Hars2 (Harsl)                      | 20   | 41   | 22  | 24  |
| P07901 | Heat shock protein HSP 90-alpha (HSP 86) (Tumor-specific transplantation 86 kDa antigen) (TSTA)                                                                                                                                       | Hsp90aa1 (Hsp86) (Hsp86-1) (Hspca) | 1529 | 2324 | 134 | 146 |
| P38647 | Stress-70 protein, mitochondrial (75 kDa glucose-regulated protein) (GRP 75) (Heat shock 70 kDa protein 9) (Peptide-binding protein 74) (PBP74) (P66 MOT) (Mortalin)                                                                  | Hspa9 (Grp75) (Hsp74) (Hspa9a)     | 33   | 33   | 12  | 13  |
| P08113 | Endoplasmic reticulum chaperone protein (Heat shock protein 90 kDa beta member 1) (94 kDa glucose-regulated protein) (GRP94) (ERP99) (Polymorphic tumor rejection antigen 1) (Tumor rejection antigen gp96)                           | Hsp90b1 (Tra-1) (Tra1)             | 221  | 298  | 25  | 27  |
| Q9Z104 | SWI/SNF-related matrix-associated actin-dependent regulator of chromatin subfamily E member 1-related (SMARCE1-related protein) (HMG box-containing protein 20B) (Structural DNA-binding protein BRAF35) (BRCA2-associated factor 35) | Hmg20b (Braf35) (Hmgx2) (Smarce1r) | 30   | 20   | 14  | 15  |
| P11984 | T-complex protein 1 subunit alpha A (TCP-1-alpha) (CCT-alpha) (Tailless complex polypeptide 1A) (TCP-1-A)                                                                                                                             | Cct1 (Ccta) (Tcp1)                 | 29   | 66   | 14  | 15  |
| P12367 | cAMP-dependent protein kinase type II-alpha regulatory subunit                                                                                                                                                                        | Prkar2a                            | 33   | 23   | 5   | 5   |



|        |                                                                                                                                                                                                              |                                        |      |      |     |     |
|--------|--------------------------------------------------------------------------------------------------------------------------------------------------------------------------------------------------------------|----------------------------------------|------|------|-----|-----|
| P30416 | FK506-binding protein 4 (EC 5.2.1.8) (Peptidyl-prolyl cis-trans isomerase) (PPIase) (Rotamase) (HSP-binding immunophilin) (HBI) (FKBP52 protein) (52 kDa FK506-binding protein) (FKBP59) (p59 protein)       | Fkbp4                                  | 40   | 62   | 8   | 8   |
| Q8C0N1 | Kinesin-like protein KIF2B                                                                                                                                                                                   | Kif2b                                  | 17   | 26   | 8   | 8   |
| Q80YV4 | Pantothenate kinase 4 (EC 2.7.1.33) (Pantothenic acid kinase 4) (mPanK4)                                                                                                                                     | Pank4                                  | 23   | 28   | 13  | 13  |
| P25206 | DNA replication licensing factor MCM3 (DNA polymerase alpha holoenzyme-associated protein P1) (P1-MCM3)                                                                                                      | Mcm3 (Mcmd) (Mcmd3)                    | 74   | 185  | 15  | 15  |
| Q8R4K2 | Interleukin-1 receptor-associated kinase 4 (IRAK-4) (EC 2.7.11.1)                                                                                                                                            | Irak4                                  | 32   | 47   | 22  | 22  |
| Q6P8J7 | Creatine kinase, sarcomeric mitochondrial (EC 2.7.3.2) (S-MtCK)                                                                                                                                              | Ckmt2                                  | 50   | 66   | 26  | 26  |
| P11499 | Heat shock protein HSP 90-beta (HSP 84) (Tumor-specific transplantation 84 kDa antigen) (TSTA)                                                                                                               | Hsp90ab1 (Hsp84) (Hsp84-1) (Hspcb)     | 2943 | 3523 | 208 | 205 |
| O08638 | Myosin-11 (Myosin heavy chain 11) (Myosin heavy chain, smooth muscle isoform) (SMMHC)                                                                                                                        | Myh11                                  | 211  | 221  | 79  | 76  |
| Q9QXL1 | Kinesin-like protein KIF21B (Kinesin-like protein KIF6)                                                                                                                                                      | Kif21b (Kif6)                          | 22   | 45   | 26  | 25  |
| Q8R4B8 | NACHT, LRR and PYD domains-containing protein 3 (Cold autoinflammatory syndrome 1 protein homolog) (Cryopyrin) (PYRIN-containing APAF1-like protein 1) (Mast cell maturation-associated-inducible protein 1) | Nlrp3 (Cias1) (Mmig1) (Nalp3) (Pypaf1) | 30   | 20   | 24  | 23  |
| Q8BGQ7 | Alanyl-tRNA synthetase, cytoplasmic (EC 6.1.1.7) (Alanine--tRNA ligase) (AlaRS)                                                                                                                              | Aars                                   | 179  | 216  | 23  | 22  |
| Q91V92 | ATP-citrate synthase (EC 2.3.3.8) (ATP-citrate (pro-S)-lyase) (Citrate cleavage enzyme)                                                                                                                      | Acly                                   | 349  | 488  | 45  | 43  |

|        |                                                                                                                                                                                                                     |                                    |      |      |     |     |
|--------|---------------------------------------------------------------------------------------------------------------------------------------------------------------------------------------------------------------------|------------------------------------|------|------|-----|-----|
| Q61768 | Kinesin-1 heavy chain (Ubiquitous kinesin heavy chain) (UKHC) (Conventional kinesin heavy chain)                                                                                                                    | Kif5b (Khcs) (Kns1)                | 102  | 303  | 43  | 41  |
| P30275 | Creatine kinase, ubiquitous mitochondrial (EC 2.7.3.2) (U-MtCK) (Acidic-type mitochondrial creatine kinase) (Mia-CK)                                                                                                | Ckmt1                              | 205  | 121  | 32  | 30  |
| Q04447 | Creatine kinase B-type (EC 2.7.3.2) (Creatine kinase B chain) (B-CK)                                                                                                                                                | Ckb (Ckbb)                         | 9079 | 7277 | 434 | 406 |
| P35969 | Vascular endothelial growth factor receptor 1 (VEGFR-1) (EC 2.7.10.1) (Tyrosine-protein kinase receptor FLT) (FLT-1) (Embryonic receptor kinase 2)                                                                  | Flt1 (Emrk2) (Flt)                 | 29   | 36   | 35  | 32  |
| Q01853 | Transitional endoplasmic reticulum ATPase (TER ATPase) (15S Mg(2+)-ATPase p97 subunit) (Valosin-containing protein) (VCP)                                                                                           | Vcp                                | 691  | 699  | 56  | 51  |
| Q8CGC7 | Bifunctional aminoacyl-tRNA synthetase [Includes: Glutamyl-tRNA synthetase (EC 6.1.1.17) (Glutamate--tRNA ligase); Prolyl-tRNA synthetase (EC 6.1.1.15) (Proline--tRNA ligase)]                                     | Eprs (Qprs)                        | 130  | 102  | 32  | 29  |
| Q8VDD5 | Myosin-9 (Myosin heavy chain 9) (Myosin heavy chain, non-muscle IIa) (Non-muscle myosin heavy chain IIa) (NMMHC II-a) (NMMHC-IIA) (Cellular myosin heavy chain, type A) (Non-muscle myosin heavy chain-A) (NMMHC-A) | Myh9                               | 780  | 839  | 127 | 115 |
| P07310 | Creatine kinase M-type (EC 2.7.3.2) (Creatine kinase M chain) (M-CK)                                                                                                                                                | Ckm (Ckmm)                         | 73   | 107  | 31  | 28  |
| Q99104 | Myosin-Va (Dilute myosin heavy chain, non-muscle)                                                                                                                                                                   | Myo5a (Dilute)                     | 28   | 34   | 35  | 31  |
| P33173 | Kinesin-like protein KIF1A (Axonal transporter of synaptic vesicles)                                                                                                                                                | Kif1a (Atsv) (Kif1)                | 45   | 108  | 25  | 22  |
| Q02053 | Ubiquitin-like modifier-activating enzyme 1 (Ubiquitin-activating enzyme E1) (Ubiquitin-like modifier-activating enzyme 1 X) (Ubiquitin-activating enzyme E1 X)                                                     | Uba1 (Sbx) (Ube1) (Ube1ax) (Ube1x) | 660  | 1086 | 63  | 55  |

|        |                                                                                                                                                                                                             |                           |     |     |    |    |
|--------|-------------------------------------------------------------------------------------------------------------------------------------------------------------------------------------------------------------|---------------------------|-----|-----|----|----|
| Q8VHE6 | Dynein heavy chain 5, axonemal (Axonemal beta dynein heavy chain 5) (Mdnah5) (Ciliary dynein heavy chain 5)                                                                                                 | Dnah5 (Dnahc5)            | 47  | 44  | 83 | 72 |
| Q9Z1Q9 | Valyl-tRNA synthetase (EC 6.1.1.9) (Valine--tRNA ligase) (ValRS) (Protein G7a)                                                                                                                              | Vars (Bat6) (G7a) (Vars2) | 380 | 302 | 37 | 32 |
| O88866 | Hormonally up-regulated neu tumor-associated kinase (EC 2.7.11.1) (Serine/threonine-protein kinase MAK-V)                                                                                                   | Hunk (Makv)               | 27  | 21  | 14 | 12 |
| Q9JM52 | Misshapen-like kinase 1 (EC 2.7.11.1) (Mitogen-activated protein kinase kinase kinase 6) (MAPK/ERK kinase kinase 6) (MEK kinase kinase 6) (MEKKK 6) (Misshapen/NIK-related kinase) (GCK family kinase MiNK) | Mink1 (Map4k6) (Mink)     | 18  | 54  | 13 | 11 |
| Q9CQN1 | Heat shock protein 75 kDa, mitochondrial (HSP 75) (Tumor necrosis factor type 1 receptor-associated protein) (TRAP-1) (TNFR-associated protein 1)                                                           | Trap1 (Hsp75)             | 197 | 335 | 13 | 11 |
| P20029 | 78 kDa glucose-regulated protein (GRP 78) (Heat shock 70 kDa protein 5) (Immunoglobulin heavy chain-binding protein) (BiP)                                                                                  | Hspa5 (Grp78)             | 262 | 312 | 25 | 21 |
| P11983 | T-complex protein 1 subunit alpha B (TCP-1-alpha) (CCT-alpha) (Tailless complex polypeptide 1B) (TCP-1-B)                                                                                                   | Cct1 (Ccta) (Tcp1)        | 29  | 66  | 18 | 15 |
| Q91XQ0 | Dynein heavy chain 8, axonemal (Axonemal beta dynein heavy chain 8) (Ciliary dynein heavy chain 8)                                                                                                          | Dnahc8                    | 47  | 51  | 77 | 64 |
| Q6URW6 | Myosin-14 (Myosin heavy chain 14) (Myosin heavy chain, non-muscle IIc) (Non-muscle myosin heavy chain IIc) (NMHC II-C)                                                                                      | Myh14                     | 60  | 48  | 53 | 44 |

|        |                                                                                                                                                                                                                                                                |                                        |     |     |     |     |
|--------|----------------------------------------------------------------------------------------------------------------------------------------------------------------------------------------------------------------------------------------------------------------|----------------------------------------|-----|-----|-----|-----|
| Q8R429 | Sarcoplasmic/endoplasmic reticulum calcium ATPase 1 (SERCA1) (EC 3.6.3.8) (Calcium pump 1) (Calcium-transporting ATPase sarcoplasmic reticulum type, fast twitch skeletal muscle isoform) (SR Ca(2+)-ATPase 1) (Endoplasmic reticulum class 1/2 Ca(2+) ATPase) | Atp2a1                                 | 25  | 17  | 17  | 14  |
| P80316 | T-complex protein 1 subunit epsilon (TCP-1-epsilon) (CCT-epsilon)                                                                                                                                                                                              | Cct5 (Ccte) (Kiaa0098)                 | 239 | 102 | 17  | 14  |
| Q569Z5 | Probable ATP-dependent RNA helicase DDX46 (EC 3.6.1.-) (DEAD box protein 46)                                                                                                                                                                                   | Ddx46 (Kiaa0801)                       | 25  | 17  | 21  | 17  |
| Q80ZW0 | Serine/threonine-protein kinase 35 (EC 2.7.11.1)                                                                                                                                                                                                               | Stk35                                  | 14  | 50  | 21  | 17  |
| Q62407 | Striated muscle-specific serine/threonine protein kinase (EC 2.7.11.1) (Aortic preferentially expressed protein 1) (APEG-1)                                                                                                                                    | Speg (Apeg1) (Kiaa1297)                | 26  | 20  | 31  | 25  |
| Q8VI47 | Canalicular multispecific organic anion transporter 1 (ATP-binding cassette sub-family C member 2)                                                                                                                                                             | Abcc2                                  | 31  | 38  | 39  | 31  |
| Q8C196 | Carbamoyl-phosphate synthase [ammonia], mitochondrial (EC 6.3.4.16) (Carbamoyl-phosphate synthetase I) (CPSase I)                                                                                                                                              | Cps1                                   | 22  | 25  | 19  | 15  |
| Q80UN9 | tRNA isopentenyltransferase, mitochondrial (IPTase) (EC 2.5.1.8) (Isopentenyl-diphosphate:tRNA isopentenyltransferase) (IPP transferase) (IPPT)                                                                                                                | Trit1 (Ipt)                            | 31  | 24  | 19  | 15  |
| Q9JHU4 | Cytoplasmic dynein 1 heavy chain 1 (Cytoplasmic dynein heavy chain 1) (Dynein heavy chain, cytosolic)                                                                                                                                                          | Dync1h1 (Dhc1) (Dnch1) (Dnchc1) (Dyhc) | 822 | 395 | 157 | 123 |
| P31254 | Ubiquitin-like modifier-activating enzyme 1 Y (Ubiquitin-activating enzyme E1 Y) (Ubiquitin-activating enzyme E1)                                                                                                                                              | Ube1ay (Sby) (Ube1y) (Ube1y1)          | 161 | 77  | 22  | 17  |

|        |                                                                                                                                                                                                                            |                                       |      |      |     |     |
|--------|----------------------------------------------------------------------------------------------------------------------------------------------------------------------------------------------------------------------------|---------------------------------------|------|------|-----|-----|
| Q8CGK3 | Lon protease homolog, mitochondrial (EC 3.4.21.-) (Lon protease-like protein) (LONP) (Mitochondrial ATP-dependent protease Lon) (Serine protease 15)                                                                       | Lonp1 (Prss15)                        | 21   | 30   | 43  | 33  |
| Q8JZQ2 | AFG3-like protein 2 (EC 3.4.24.-)                                                                                                                                                                                          | Afg3l2                                | 15   | 27   | 17  | 13  |
| Q569Z6 | Thyroid hormone receptor-associated protein 3 (Thyroid hormone receptor-associated protein complex 150 kDa component) (Trap150)                                                                                            | Thrap3 (Trap150)                      | 29   | 48   | 21  | 16  |
| P16627 | Heat shock 70 kDa protein 1L (Heat shock 70 kDa protein 1-like) (Heat shock 70 kDa-like protein 1) (Spermatid-specific heat shock protein 70)                                                                              | Hspa1l (Hsc70t)                       | 319  | 238  | 33  | 25  |
| O70228 | Probable phospholipid-transporting ATPase IIA (EC 3.6.3.1) (ATPase class II type 9A)                                                                                                                                       | Atp9a                                 | 31   | 29   | 37  | 28  |
| P56480 | ATP synthase subunit beta, mitochondrial (EC 3.6.3.14)                                                                                                                                                                     | Atp5b                                 | 31   | 50   | 8   | 6   |
| Q02956 | Protein kinase C zeta type (EC 2.7.11.13) (nPKC-zeta)                                                                                                                                                                      | Prkcz (PkcZ)                          | 29   | 15   | 8   | 6   |
| Q9DBP5 | UMP-CMP kinase (EC 2.7.4.14) (Cytidylate kinase) (Deoxycytidylate kinase) (Cytidine monophosphate kinase) (Uridine monophosphate kinase) (Uridine monophosphate/cytidine monophosphate kinase) (UMP/CMP kinase) (UMP/CMPK) | Cmpk1 (Cmk) (Cmpk) (Uck) (Umk) (Umpk) | 107  | 93   | 12  | 9   |
| Q8K045 | Serine/threonine-protein kinase N3 (EC 2.7.11.13) (Protein kinase PKN-beta) (Protein-kinase C-related kinase 3)                                                                                                            | Pkn3 (Pknbeta)                        | 130  | 126  | 36  | 27  |
| P60710 | Actin, cytoplasmic 1 (Beta-actin)                                                                                                                                                                                          | Actb                                  | 5140 | 4496 | 282 | 208 |
| Q61656 | Probable ATP-dependent RNA helicase DDX5 (EC 3.6.1.-) (DEAD box protein 5) (RNA helicase p68) (DEAD box RNA helicase DEAD1) (mDEAD1)                                                                                       | Ddx5 (Tnz2)                           | 90   | 43   | 11  | 8   |
| Q61696 | Heat shock 70 kDa protein 1A (Heat shock 70 kDa protein 3) (HSP70.3) (Hsp68)                                                                                                                                               | Hspa1a (Hsp70-3) (Hsp70A1)            | 266  | 236  | 33  | 24  |

|        |                                                                                                                                                                                                                       |                                    |      |      |     |     |
|--------|-----------------------------------------------------------------------------------------------------------------------------------------------------------------------------------------------------------------------|------------------------------------|------|------|-----|-----|
| Q61699 | Heat shock protein 105 kDa (Heat shock-related 100 kDa protein E7I) (HSP-E7I) (Heat shock 110 kDa protein) (42 degrees C-HSP)                                                                                         | Hsph1 (Hsp105) (Hsp110) (Kiaa0201) | 46   | 48   | 18  | 13  |
| Q8BMJ2 | Leucyl-tRNA synthetase, cytoplasmic (EC 6.1.1.4) (Leucine--tRNA ligase) (LeuRS)                                                                                                                                       | Lars                               | 52   | 45   | 47  | 33  |
| Q6PHN9 | Ras-related protein Rab-35                                                                                                                                                                                            | Rab35                              | 17   | 59   | 3   | 2   |
| P61164 | Alpha-centractin (Centractin) (Centrosome-associated actin homolog) (Actin-RPV) (ARP1)                                                                                                                                | Actr1a (Ctrn1)                     | 247  | 124  | 27  | 18  |
| P68033 | Actin, alpha cardiac muscle 1 (Alpha-cardiac actin)                                                                                                                                                                   | Actc1 (Actc)                       | 3948 | 2726 | 234 | 155 |
| P42932 | T-complex protein 1 subunit theta (TCP-1-theta) (CCT-theta)                                                                                                                                                           | Cct8 (Cctq)                        | 197  | 57   | 23  | 15  |
| P61161 | Actin-related protein 2 (Actin-like protein 2)                                                                                                                                                                        | Actr2 (Arp2)                       | 247  | 124  | 28  | 18  |
| Q8CG48 | Structural maintenance of chromosomes protein 2 (Chromosome-associated protein E) (XCAP-E homolog) (FGF-inducible protein 16)                                                                                         | Smc2 (Cape) (Fin16) (Smc2l1)       | 32   | 36   | 41  | 26  |
| Q8C7H1 | Methylmalonic aciduria type A homolog, mitochondrial                                                                                                                                                                  | Mmaa                               | 31   | 37   | 16  | 10  |
| P17156 | Heat shock-related 70 kDa protein 2 (Heat shock protein 70.2)                                                                                                                                                         | Hspa2 (Hcp70.2) (Hsp70-2)          | 964  | 544  | 60  | 37  |
| Q61879 | Myosin-10 (Myosin heavy chain 10) (Myosin heavy chain, non-muscle IIb) (Non-muscle myosin heavy chain IIb) (NMMHC II-b) (NMMHC-IIB) (Cellular myosin heavy chain, type B) (Non-muscle myosin heavy chain-B) (NMMHC-B) | Myh10                              | 122  | 101  | 65  | 40  |
| Q9Z0P5 | Twinfilin-2 (Twinfilin-1-like protein) (A6-related protein) (mA6RP)                                                                                                                                                   | Twf2 (Ptk9I)                       | 29   | 32   | 10  | 6   |
| Q9QWK5 | Baculoviral IAP repeat-containing protein 1a (Neuronal apoptosis inhibitory protein 1)                                                                                                                                | Naip1 (Birc1a) (Naip)              | 21   | 28   | 20  | 12  |

|        |                                                                                                                                                                                                                               |                             |      |     |     |    |
|--------|-------------------------------------------------------------------------------------------------------------------------------------------------------------------------------------------------------------------------------|-----------------------------|------|-----|-----|----|
| Q9EQZ6 | Rap guanine nucleotide exchange factor 4 (cAMP-regulated guanine nucleotide exchange factor II) (cAMP-GEFII) (Exchange factor directly activated by cAMP 2) (Epac 2) (cAMP-dependent Rap1 guanine-nucleotide exchange factor) | Rapgef4 (Cgef2) (Epac2)     | 47   | 23  | 20  | 12 |
| P63038 | 60 kDa heat shock protein, mitochondrial (Heat shock protein 60) (HSP-60) (Hsp60) (60 kDa chaperonin) (Chaperonin 60) (CPN60) (Mitochondrial matrix protein P1) (HSP-65)                                                      | Hspd1 (Hsp60)               | 15   | 32  | 22  | 13 |
| P80317 | T-complex protein 1 subunit zeta (TCP-1-zeta) (CCT-zeta) (CCT-zeta-1)                                                                                                                                                         | Cct6a (Cct6) (Cctz) (Cctz1) | 160  | 52  | 22  | 13 |
| P10630 | Eukaryotic initiation factor 4A-II (eIF-4A-II) (eIF4A-II) (EC 3.6.1.-) (ATP-dependent RNA helicase eIF4A-2)                                                                                                                   | Eif4a2 (Ddx2b)              | 194  | 78  | 17  | 10 |
| P09041 | Phosphoglycerate kinase 2 (EC 2.7.2.3) (Phosphoglycerate kinase, testis specific)                                                                                                                                             | Pgk2 (Pkg-2)                | 162  | 73  | 17  | 10 |
| P63017 | Heat shock cognate 71 kDa protein (Heat shock 70 kDa protein 8)                                                                                                                                                               | Hspa8 (Hsc70) (Hsc73)       | 1719 | 959 | 119 | 70 |
| P05532 | Mast/stem cell growth factor receptor (SCFR) (EC 2.7.10.1) (Proto-oncogene tyrosine-protein kinase Kit) (c-kit) (CD antigen CD117)                                                                                            | Kit (Sl)                    | 16   | 35  | 12  | 7  |
| Q9QUK4 | Baculoviral IAP repeat-containing protein 1b (Neuronal apoptosis inhibitory protein 2)                                                                                                                                        | Naip2 (Birc1b) (Naip-rs6)   | 21   | 28  | 14  | 8  |
| Q8K2I9 | F-box only protein 18 (EC 3.6.1.-) (F-box DNA helicase 1)                                                                                                                                                                     | Fbxo18 (Fbh1) (Fbx18)       | 30   | 23  | 9   | 5  |

|                           |        |                                                                                                                                                                                                                                     |                           |     |     |    |    |
|---------------------------|--------|-------------------------------------------------------------------------------------------------------------------------------------------------------------------------------------------------------------------------------------|---------------------------|-----|-----|----|----|
|                           | Q8BYH8 | Chromodomain-helicase-DNA-binding protein 9 (CHD-9) (EC 3.6.1.-) (ATP-dependent helicase CHD9) (Peroxisomal proliferator-activated receptor A-interacting complex 320 kDa protein) (PPAR-alpha-interacting complex protein 320 kDa) | Chd9 (Kiaa0308) (Pric320) | 39  | 27  | 49 | 27 |
|                           | Q9WTU3 | Sodium channel protein type 8 subunit alpha (Sodium channel protein type VIII subunit alpha) (Voltage-gated sodium channel subunit alpha Nav1.6)                                                                                    | Scn8a (Nbna1)             | 28  | 19  | 20 | 11 |
|                           | Q61390 | T-complex protein 1 subunit zeta-2 (TCP-1-zeta-2) (CCT-zeta-2) (Cctz-2)                                                                                                                                                             | Cct6b                     | 55  | 52  | 15 | 8  |
|                           | Q80UE6 | Serine/threonine-protein kinase WNK4 (EC 2.7.11.1) (Protein kinase with no lysine 4) (Protein kinase, lysine-deficient 4)                                                                                                           | Wnk4 (Prkwnk4)            | 23  | 33  | 29 | 15 |
| adenyl nucleotide binding | P97311 | DNA replication licensing factor MCM6 (Mis5 homolog)                                                                                                                                                                                | Mcm6 (Mcmd6) (Mis5)       | 110 | 395 | 20 | 38 |
|                           | O88705 | Potassium/sodium hyperpolarization-activated cyclic nucleotide-gated channel 3 (Hyperpolarization-activated cation channel 3) (HAC-3)                                                                                               | Hcn3 (Hac3)               | 75  | 67  | 8  | 15 |
|                           | Q8BYC6 | Serine/threonine-protein kinase TAO3 (EC 2.7.11.1) (Thousand and one amino acid protein 3)                                                                                                                                          | Taok3                     | 32  | 38  | 9  | 16 |
|                           | Q9R117 | Non-receptor tyrosine-protein kinase TYK2 (EC 2.7.10.2)                                                                                                                                                                             | Tyk2                      | 27  | 30  | 15 | 26 |
|                           | Q8R1S0 | Ubiquinone biosynthesis monooxygenase COQ6 (EC 1.14.13.-)                                                                                                                                                                           | Coq6                      | 42  | 92  | 10 | 17 |
|                           | Q9Z129 | ATP-dependent DNA helicase Q1 (EC 3.6.1.-) (DNA-dependent ATPase Q1)                                                                                                                                                                | Recql (Recql1)            | 17  | 27  | 13 | 22 |
|                           | P15532 | Nucleoside diphosphate kinase A (NDP kinase A) (NDK A) (EC 2.7.4.6) (Tumor metastatic process-associated protein) (Metastasis inhibition factor NM23) (NDPK-A) (nm23-M1)                                                            | Nme1 (Nm23)               | 150 | 261 | 8  | 13 |



|        |                                                                                                                                                                                                                                                       |                      |     |     |    |    |
|--------|-------------------------------------------------------------------------------------------------------------------------------------------------------------------------------------------------------------------------------------------------------|----------------------|-----|-----|----|----|
| Q501J6 | Probable ATP-dependent RNA helicase DDX17 (EC 3.6.1.-) (DEAD box protein 17)                                                                                                                                                                          | Ddx17                | 90  | 43  | 7  | 11 |
| Q9Z1S0 | Mitotic checkpoint serine/threonine-protein kinase BUB1 beta (EC 2.7.11.1) (MAD3/BUB1-related protein kinase) (Mitotic checkpoint kinase MAD3L)                                                                                                       | Bub1b (Mad3l)        | 20  | 41  | 15 | 23 |
| P83741 | Serine/threonine-protein kinase WNK1 (EC 2.7.11.1) (Protein kinase with no lysine 1) (Protein kinase, lysine-deficient 1)                                                                                                                             | Wnk1 (Prkwnk1)       | 56  | 36  | 18 | 27 |
| P35761 | Dual specificity protein kinase TTK (ESK) (PYT) (EC 2.7.12.1)                                                                                                                                                                                         | Ttk (Esk)            | 14  | 34  | 9  | 13 |
| Q00342 | FL cytokine receptor (EC 2.7.10.1) (Tyrosine-protein kinase receptor flk-2) (Fetal liver kinase 2) (Tyrosine-protein kinase FLT3) (CD antigen CD135)                                                                                                  | Flt3 (Flk-2) (Flt3)  | 17  | 34  | 7  | 10 |
| Q9Z1F9 | SUMO-activating enzyme subunit 2 (EC 6.3.2.-) (Ubiquitin-like 1-activating enzyme E1B) (Anthracycline-associated resistance ARX)                                                                                                                      | Uba2 (Sae2) (Uble1b) | 62  | 77  | 10 | 14 |
| P17047 | Lysosome-associated membrane glycoprotein 2 (LAMP-2) (Lysosomal membrane glycoprotein type B) (LGP-B) (CD107 antigen-like family member B) (CD antigen CD107b)                                                                                        | Lamp2 (Lamp-2)       | 26  | 29  | 8  | 11 |
| P27641 | ATP-dependent DNA helicase 2 subunit 2 (EC 3.6.1.-) (ATP-dependent DNA helicase II 80 kDa subunit) (Ku autoantigen protein p86 homolog) (Ku80) (CTC box-binding factor 85 kDa subunit) (CTCBF) (CTC85) (Nuclear factor IV) (DNA repair protein XRCC5) | Xrcc5 (G22p2)        | 22  | 29  | 16 | 22 |
| P70296 | Phosphatidylethanolamine-binding protein 1 (PEBP-1) (HCNPPp) [Cleaved into: Hippocampal cholinergic neurostimulating peptide (HCNP)]                                                                                                                  | Pebp1 (Pbp) (Pebp)   | 532 | 730 | 25 | 33 |

|        |                                                                                                                                                                                                                                |                        |     |     |    |    |
|--------|--------------------------------------------------------------------------------------------------------------------------------------------------------------------------------------------------------------------------------|------------------------|-----|-----|----|----|
| Q5SXJ3 | Fanconi anemia group J protein homolog (Protein FACJ) (EC 3.6.1.-) (ATP-dependent RNA helicase BRIP1) (BRCA1-interacting protein C-terminal helicase 1) (BRCA1-interacting protein 1) (BRCA1-associated C-terminal helicase 1) | Brip1 (Bach1) (Fanci)  | 25  | 18  | 13 | 17 |
| Q61846 | Maternal embryonic leucine zipper kinase (EC 2.7.11.1) (Protein kinase PK38) (mPK38)                                                                                                                                           | Melk (Kiaa0175) (Pk38) | 28  | 32  | 10 | 13 |
| Q61496 | Probable ATP-dependent RNA helicase DDX4 (EC 3.6.1.-) (DEAD box protein 4) (Vasa homolog) (Mvh)                                                                                                                                | Ddx4 (Vasa)            | 17  | 25  | 44 | 56 |
| P61028 | Ras-related protein Rab-8B                                                                                                                                                                                                     | Rab8b                  | 17  | 59  | 4  | 5  |
| Q61316 | Heat shock 70 kDa protein 4 (Heat shock 70-related protein APG-2)                                                                                                                                                              | Hspa4 (Apg2) (Hsp110)  | 379 | 792 | 42 | 52 |
| Q8BU30 | Isoleucyl-tRNA synthetase, cytoplasmic (EC 6.1.1.5) (Isoleucine--tRNA ligase) (IleRS) (IRS)                                                                                                                                    | Iars                   | 85  | 46  | 30 | 37 |
| O08648 | Mitogen-activated protein kinase kinase kinase 4 (EC 2.7.11.25) (MAPK/ERK kinase kinase 4) (MEK kinase 4) (MEKK 4)                                                                                                             | Map3k4 (Mekk4)         | 37  | 16  | 19 | 23 |
| P49025 | Citron Rho-interacting kinase (CRIK) (EC 2.7.11.1) (Rho-interacting, serine/threonine-protein kinase 21)                                                                                                                       | Cit                    | 49  | 67  | 67 | 81 |
| Q60848 | Lymphocyte-specific helicase (EC 3.6.1.-) (Proliferation associated SNF2-like protein)                                                                                                                                         | Hells (Lsh) (Pasg)     | 37  | 35  | 10 | 12 |
| P80315 | T-complex protein 1 subunit delta (TCP-1-delta) (CCT-delta) (A45)                                                                                                                                                              | Cct4 (Cctd)            | 61  | 59  | 15 | 18 |
| Q60575 | Kinesin-like protein KIF1B                                                                                                                                                                                                     | Kif1b                  | 45  | 95  | 30 | 36 |
| Q61771 | Kinesin-like protein KIF3B (Microtubule plus end-directed kinesin motor 3B)                                                                                                                                                    | Kif3b                  | 30  | 51  | 16 | 19 |
| Q9R0K7 | Plasma membrane calcium-transporting ATPase 2 (PMCA2) (EC 3.6.3.8) (Plasma membrane calcium ATPase isoform 2) (Plasma membrane calcium pump isoform 2)                                                                         | Atp2b2 (Pmca2)         | 32  | 27  | 70 | 83 |

|        |                                                                                                                                                                              |                                    |      |      |     |     |
|--------|------------------------------------------------------------------------------------------------------------------------------------------------------------------------------|------------------------------------|------|------|-----|-----|
| P80313 | T-complex protein 1 subunit eta (TCP-1-eta) (CCT-eta)                                                                                                                        | Cct7 (Ccth)                        | 49   | 50   | 11  | 13  |
| P49718 | DNA replication licensing factor MCM5 (CDC46 homolog) (P1-CDC46)                                                                                                             | Mcm5 (Cdc46) (Mcmd5)               | 40   | 20   | 18  | 21  |
| P97820 | Mitogen-activated protein kinase kinase kinase 4 (EC 2.7.11.1) (MAPK/ERK kinase kinase 4) (MEK kinase kinase 4) (MEKKK 4) (HPK/GCK-like kinase HGK) (Nck-interacting kinase) | Map4k4 (Nik)                       | 65   | 54   | 15  | 17  |
| P26618 | Alpha-type platelet-derived growth factor receptor (EC 2.7.10.1) (PDGF-R-alpha) (CD140 antigen-like family member A) (CD antigen CD140a)                                     | Pdgfra                             | 37   | 73   | 160 | 178 |
| P49717 | DNA replication licensing factor MCM4 (CDC21 homolog) (P1-CDC21)                                                                                                             | Mcm4 (Cdc21) (Mcmd4)               | 29   | 18   | 11  | 12  |
| Q3THS6 | S-adenosylmethionine synthetase isoform type 2 (AdoMet synthetase 2) (EC 2.5.1.6) (Methionine adenosyltransferase 2)                                                         | Mat2a                              | 26   | 42   | 11  | 12  |
| Q99KK9 | Probable histidyl-tRNA synthetase, mitochondrial (EC 6.1.1.21) (Histidine--tRNA ligase) (HisRS) (Histidine--tRNA ligase-like)                                                | Hars2 (Harsl)                      | 20   | 41   | 22  | 24  |
| P07901 | Heat shock protein HSP 90-alpha (HSP 86) (Tumor-specific transplantation 86 kDa antigen) (TSTA)                                                                              | Hsp90aa1 (Hsp86) (Hsp86-1) (Hspca) | 1529 | 2324 | 134 | 146 |
| P38647 | Stress-70 protein, mitochondrial (75 kDa glucose-regulated protein) (GRP 75) (Heat shock 70 kDa protein 9) (Peptide-binding protein 74) (PBP74) (P66 MOT) (Mortalin)         | Hspa9 (Grp75) (Hsp74) (Hspa9a)     | 33   | 33   | 12  | 13  |

|        |                                                                                                                                                                                                                                       |                                    |     |     |    |    |
|--------|---------------------------------------------------------------------------------------------------------------------------------------------------------------------------------------------------------------------------------------|------------------------------------|-----|-----|----|----|
| P08113 | Endoplasmic reticulum chaperone (Heat shock protein 90 kDa beta member 1) (94 kDa glucose-regulated protein) (GRP94) (ERP99) (Polymorphic tumor rejection antigen 1) (Tumor rejection antigen gp96)                                   | Hsp90b1 (Tra1) (Tra1)              | 221 | 298 | 25 | 27 |
| Q9Z104 | SWI/SNF-related matrix-associated actin-dependent regulator of chromatin subfamily E member 1-related (SMARCE1-related protein) (HMG box-containing protein 20B) (Structural DNA-binding protein BRAF35) (BRCA2-associated factor 35) | Hmg20b (Braf35) (Hmgx2) (Smarce1r) | 30  | 20  | 14 | 15 |
| P11984 | T-complex protein 1 subunit alpha A (TCP-1-alpha) (CCT-alpha) (Tailless complex polypeptide 1A) (TCP-1-A)                                                                                                                             | Cct1 (Ccta) (Tcp1)                 | 29  | 66  | 14 | 15 |
| Q3TY86 | Apoptosis-inducing factor 3 (EC 1.-.-.-) (Apoptosis-inducing factor-like protein)                                                                                                                                                     | Aifm3 (Aifl)                       | 42  | 26  | 28 | 30 |
| P12367 | cAMP-dependent protein kinase type II-alpha regulatory subunit                                                                                                                                                                        | Prkar2a                            | 33  | 23  | 5  | 5  |
| P30416 | FK506-binding protein 4 (EC 5.2.1.8) (Peptidyl-prolyl cis-trans isomerase) (PPIase) (Rotamase) (HSP-binding immunophilin) (HBI) (FKBP52 protein) (52 kDa FK506-binding protein) (FKBP59) (p59 protein)                                | Fkbp4                              | 40  | 62  | 8  | 8  |
| Q8C0N1 | Kinesin-like protein KIF2B                                                                                                                                                                                                            | Kif2b                              | 17  | 26  | 8  | 8  |
| Q80YV4 | Pantothenate kinase 4 (EC 2.7.1.33) (Pantothenic acid kinase 4) (mPanK4)                                                                                                                                                              | Pank4                              | 23  | 28  | 13 | 13 |
| P25206 | DNA replication licensing factor MCM3 (DNA polymerase alpha holoenzyme-associated protein P1) (P1-MCM3)                                                                                                                               | Mcm3 (Mcmd) (Mcmd3)                | 74  | 185 | 15 | 15 |
| Q8R4K2 | Interleukin-1 receptor-associated kinase 4 (IRAK-4) (EC 2.7.11.1)                                                                                                                                                                     | Irak4                              | 32  | 47  | 22 | 22 |
| Q6P8J7 | Creatine kinase, sarcomeric mitochondrial (EC 2.7.3.2) (S-MtCK)                                                                                                                                                                       | Ckmt2                              | 50  | 66  | 26 | 26 |

|        |                                                                                                                                                                                                              |                                        |      |      |     |     |
|--------|--------------------------------------------------------------------------------------------------------------------------------------------------------------------------------------------------------------|----------------------------------------|------|------|-----|-----|
| P11499 | Heat shock protein HSP 90-beta (HSP 84) (Tumor-specific transplantation 84 kDa antigen) (TSTA)                                                                                                               | Hsp90ab1 (Hsp84) (Hsp84-1) (Hspcb)     | 2943 | 3523 | 208 | 205 |
| O08638 | Myosin-11 (Myosin heavy chain 11) (Myosin heavy chain, smooth muscle isoform) (SMMHC)                                                                                                                        | Myh11                                  | 211  | 221  | 79  | 76  |
| Q9QXL1 | Kinesin-like protein KIF21B (Kinesin-like protein KIF6)                                                                                                                                                      | Kif21b (Kif6)                          | 22   | 45   | 26  | 25  |
| Q8R4B8 | NACHT, LRR and PYD domains-containing protein 3 (Cold autoinflammatory syndrome 1 protein homolog) (Cryopyrin) (PYRIN-containing APAF1-like protein 1) (Mast cell maturation-associated-inducible protein 1) | Nlrp3 (Cias1) (Mmig1) (Nalp3) (Pypaf1) | 30   | 20   | 24  | 23  |
| Q8BGQ7 | Alanyl-tRNA synthetase, cytoplasmic (EC 6.1.1.7) (Alanine--tRNA ligase) (AlaRS)                                                                                                                              | Aars                                   | 179  | 216  | 23  | 22  |
| Q91V92 | ATP-citrate synthase (EC 2.3.3.8) (ATP-citrate (pro-S)-lyase) (Citrate cleavage enzyme)                                                                                                                      | Acly                                   | 349  | 488  | 45  | 43  |
| Q61768 | Kinesin-1 heavy chain (Ubiquitous kinesin heavy chain) (UKHC) (Conventional kinesin heavy chain)                                                                                                             | Kif5b (Khcs) (Kns1)                    | 102  | 303  | 43  | 41  |
| P30275 | Creatine kinase, ubiquitous mitochondrial (EC 2.7.3.2) (U-MtCK) (Acidic-type mitochondrial creatine kinase) (Mia-CK)                                                                                         | Ckmt1                                  | 205  | 121  | 32  | 30  |
| Q04447 | Creatine kinase B-type (EC 2.7.3.2) (Creatine kinase B chain) (B-CK)                                                                                                                                         | Ckb (Ckbb)                             | 9079 | 7277 | 434 | 406 |
| P35969 | Vascular endothelial growth factor receptor 1 (VEGFR-1) (EC 2.7.10.1) (Tyrosine-protein kinase receptor FLT) (FLT-1) (Embryonic receptor kinase 2)                                                           | Flt1 (Emrk2) (Flt)                     | 29   | 36   | 35  | 32  |
| Q01853 | Transitional endoplasmic reticulum ATPase (TER ATPase) (15S Mg(2+)-ATPase p97 subunit) (Valosin-containing protein) (VCP)                                                                                    | Vcp                                    | 691  | 699  | 56  | 51  |

|        |                                                                                                                                                                                                                     |                                    |     |      |     |     |
|--------|---------------------------------------------------------------------------------------------------------------------------------------------------------------------------------------------------------------------|------------------------------------|-----|------|-----|-----|
| Q8CGC7 | Bifunctional aminoacyl-tRNA synthetase [Includes: Glutamyl-tRNA synthetase (EC 6.1.1.17) (Glutamate--tRNA ligase); Prolyl-tRNA synthetase (EC 6.1.1.15) (Proline--tRNA ligase)]                                     | Eprs (Qprs)                        | 130 | 102  | 32  | 29  |
| Q8VDD5 | Myosin-9 (Myosin heavy chain 9) (Myosin heavy chain, non-muscle IIa) (Non-muscle myosin heavy chain IIa) (NMMHC II-a) (NMMHC-IIA) (Cellular myosin heavy chain, type A) (Non-muscle myosin heavy chain-A) (NMMHC-A) | Myh9                               | 780 | 839  | 127 | 115 |
| P07310 | Creatine kinase M-type (EC 2.7.3.2) (Creatine kinase M chain) (M-CK)                                                                                                                                                | Ckm (Ckmm)                         | 73  | 107  | 31  | 28  |
| Q99104 | Myosin-Va (Dilute myosin heavy chain, non-muscle)                                                                                                                                                                   | Myo5a (Dilute)                     | 28  | 34   | 35  | 31  |
| P33173 | Kinesin-like protein KIF1A (Axonal transporter of synaptic vesicles)                                                                                                                                                | Kif1a (Atsv) (Kif1)                | 45  | 108  | 25  | 22  |
| Q02053 | Ubiquitin-like modifier-activating enzyme 1 (Ubiquitin-activating enzyme E1) (Ubiquitin-like modifier-activating enzyme 1 X) (Ubiquitin-activating enzyme E1 X)                                                     | Uba1 (Sbx) (Ube1) (Ube1ax) (Ube1x) | 660 | 1086 | 63  | 55  |
| Q8VHE6 | Dynein heavy chain 5, axonemal (Axonemal beta dynein heavy chain 5) (Mdnah5) (Ciliary dynein heavy chain 5)                                                                                                         | Dnah5 (Dnahc5)                     | 47  | 44   | 83  | 72  |
| Q9Z1Q9 | Valyl-tRNA synthetase (EC 6.1.1.9) (Valine--tRNA ligase) (ValRS) (Protein G7a)                                                                                                                                      | Vars (Bat6) (G7a) (Vars2)          | 380 | 302  | 37  | 32  |
| O88866 | Hormonally up-regulated neu tumor-associated kinase (EC 2.7.11.1) (Serine/threonine-protein kinase MAK-V)                                                                                                           | Hunk (Makv)                        | 27  | 21   | 14  | 12  |
| Q9JM52 | Misshapen-like kinase 1 (EC 2.7.11.1) (Mitogen-activated protein kinase kinase kinase 6) (MAPK/ERK kinase kinase 6) (MEK kinase kinase 6) (MEKKK 6) (Misshapen/NIK-related kinase) (GCK family kinase MiNK)         | Mink1 (Map4k6) (Mink)              | 18  | 54   | 13  | 11  |

|        |                                                                                                                                                                                                                                                                |                         |     |     |    |    |
|--------|----------------------------------------------------------------------------------------------------------------------------------------------------------------------------------------------------------------------------------------------------------------|-------------------------|-----|-----|----|----|
| Q9CQN1 | Heat shock protein 75 kDa, mitochondrial (HSP 75) (Tumor necrosis factor type 1 receptor-associated protein) (TRAP-1) (TNFR-associated protein 1)                                                                                                              | Trap1 (Hsp75)           | 197 | 335 | 13 | 11 |
| P20029 | 78 kDa glucose-regulated protein (GRP 78) (Heat shock 70 kDa protein 5) (Immunoglobulin heavy chain-binding protein) (BiP)                                                                                                                                     | Hspa5 (Grp78)           | 262 | 312 | 25 | 21 |
| P11983 | T-complex protein 1 subunit alpha B (TCP-1-alpha) (CCT-alpha) (Tailless complex polypeptide 1B) (TCP-1-B)                                                                                                                                                      | Cct1 (Ccta) (Tcp1)      | 29  | 66  | 18 | 15 |
| Q91XQ0 | Dynein heavy chain 8, axonemal (Axonemal beta dynein heavy chain 8) (Ciliary dynein heavy chain 8)                                                                                                                                                             | Dnahc8                  | 47  | 51  | 77 | 64 |
| Q6URW6 | Myosin-14 (Myosin heavy chain 14) (Myosin heavy chain, non-muscle IIc) (Non-muscle myosin heavy chain IIc) (NMHC II-C)                                                                                                                                         | Myh14                   | 60  | 48  | 53 | 44 |
| Q8R429 | Sarcoplasmic/endoplasmic reticulum calcium ATPase 1 (SERCA1) (EC 3.6.3.8) (Calcium pump 1) (Calcium-transporting ATPase sarcoplasmic reticulum type, fast twitch skeletal muscle isoform) (SR Ca(2+)-ATPase 1) (Endoplasmic reticulum class 1/2 Ca(2+) ATPase) | Atp2a1                  | 25  | 17  | 17 | 14 |
| P80316 | T-complex protein 1 subunit epsilon (TCP-1-epsilon) (CCT-epsilon)                                                                                                                                                                                              | Cct5 (Ccte) (Kiaa0098)  | 239 | 102 | 17 | 14 |
| Q569Z5 | Probable ATP-dependent RNA helicase DDX46 (EC 3.6.1.-) (DEAD box protein 46)                                                                                                                                                                                   | Ddx46 (Kiaa0801)        | 25  | 17  | 21 | 17 |
| Q80ZW0 | Serine/threonine-protein kinase 35 (EC 2.7.11.1)                                                                                                                                                                                                               | Stk35                   | 14  | 50  | 21 | 17 |
| Q62407 | Striated muscle-specific serine/threonine protein kinase (EC 2.7.11.1) (Aortic preferentially expressed protein 1) (APEG-1)                                                                                                                                    | Speg (Apeg1) (Kiaa1297) | 26  | 20  | 31 | 25 |

|        |                                                                                                                                                      |                                        |     |     |     |     |
|--------|------------------------------------------------------------------------------------------------------------------------------------------------------|----------------------------------------|-----|-----|-----|-----|
| Q8VI47 | Canalicular multispecific organic anion transporter 1 (ATP-binding cassette sub-family C member 2)                                                   | Abcc2                                  | 31  | 38  | 39  | 31  |
| Q8C196 | Carbamoyl-phosphate synthase [ammonia], mitochondrial (EC 6.3.4.16) (Carbamoyl-phosphate synthetase I) (CPSase I)                                    | Cps1                                   | 22  | 25  | 19  | 15  |
| Q80UN9 | tRNA isopentenyltransferase, mitochondrial (IPTase) (EC 2.5.1.8) (Isopentenyl-diphosphate:tRNA isopentenyltransferase) (IPP transferase) (IPPT)      | Trit1 (lpt)                            | 31  | 24  | 19  | 15  |
| Q9JHU4 | Cytoplasmic dynein 1 heavy chain 1 (Cytoplasmic dynein heavy chain 1) (Dynein heavy chain, cytosolic)                                                | Dync1h1 (Dhc1) (Dnch1) (Dnchc1) (Dyhc) | 822 | 395 | 157 | 123 |
| P31254 | Ubiquitin-like modifier-activating enzyme 1 Y (Ubiquitin-activating enzyme E1 Y) (Ubiquitin-activating enzyme E1)                                    | Ube1ay (Sby) (Ube1y) (Ube1y1)          | 161 | 77  | 22  | 17  |
| Q8CGK3 | Lon protease homolog, mitochondrial (EC 3.4.21.-) (Lon protease-like protein) (LONP) (Mitochondrial ATP-dependent protease Lon) (Serine protease 15) | Lonp1 (Prss15)                         | 21  | 30  | 43  | 33  |
| Q8JZQ2 | AFG3-like protein 2 (EC 3.4.24.-)                                                                                                                    | Afg3l2                                 | 15  | 27  | 17  | 13  |
| Q569Z6 | Thyroid hormone receptor-associated protein 3 (Thyroid hormone receptor-associated protein complex 150 kDa component) (Trap150)                      | Thrap3 (Trap150)                       | 29  | 48  | 21  | 16  |
| P16627 | Heat shock 70 kDa protein 1L (Heat shock 70 kDa protein 1-like) (Heat shock 70 kDa-like protein 1) (Spermatid-specific heat shock protein 70)        | Hspa1l (Hsc70t)                        | 319 | 238 | 33  | 25  |
| O70228 | Probable phospholipid-transporting ATPase IIA (EC 3.6.3.1) (ATPase class II type 9A)                                                                 | Atp9a                                  | 31  | 29  | 37  | 28  |
| P56480 | ATP synthase subunit beta, mitochondrial (EC 3.6.3.14)                                                                                               | Atp5b                                  | 31  | 50  | 8   | 6   |



|        |                                                                                                                                                                                                                            |                                       |      |      |     |     |
|--------|----------------------------------------------------------------------------------------------------------------------------------------------------------------------------------------------------------------------------|---------------------------------------|------|------|-----|-----|
| Q02956 | Protein kinase C zeta type (EC 2.7.11.13) (nPKC-zeta)                                                                                                                                                                      | Prkcz (PkcZ)                          | 29   | 15   | 8   | 6   |
| Q9DBP5 | UMP-CMP kinase (EC 2.7.4.14) (Cytidylate kinase) (Deoxycytidylate kinase) (Cytidine monophosphate kinase) (Uridine monophosphate kinase) (Uridine monophosphate/cytidine monophosphate kinase) (UMP/CMP kinase) (UMP/CMPK) | Cmpk1 (Cmk) (Cmpk) (Uck) (Umk) (Umpk) | 107  | 93   | 12  | 9   |
| Q8K045 | Serine/threonine-protein kinase N3 (EC 2.7.11.13) (Protein kinase PKN-beta) (Protein-kinase C-related kinase 3)                                                                                                            | Pkn3 (Pknbeta)                        | 130  | 126  | 36  | 27  |
| P60710 | Actin, cytoplasmic 1 (Beta-actin)                                                                                                                                                                                          | Actb                                  | 5140 | 4496 | 282 | 208 |
| Q61656 | Probable ATP-dependent RNA helicase DDX5 (EC 3.6.1.-) (DEAD box protein 5) (RNA helicase p68) (DEAD box RNA helicase DEAD1) (mDEAD1)                                                                                       | Ddx5 (Tnz2)                           | 90   | 43   | 11  | 8   |
| Q61696 | Heat shock 70 kDa protein 1A (Heat shock 70 kDa protein 3) (HSP70.3) (Hsp68)                                                                                                                                               | Hspa1a (Hsp70-3) (Hsp70A1)            | 266  | 236  | 33  | 24  |
| Q61699 | Heat shock protein 105 kDa (Heat shock-related 100 kDa protein E7I) (HSP-E7I) (Heat shock 110 kDa protein) (42 degrees C-HSP)                                                                                              | Hsph1 (Hsp105) (Hsp110) (Kiaa0201)    | 46   | 48   | 18  | 13  |
| Q8BMJ2 | Leucyl-tRNA synthetase, cytoplasmic (EC 6.1.1.4) (Leucine--tRNA ligase) (LeuRS)                                                                                                                                            | Lars                                  | 52   | 45   | 47  | 33  |
| Q6PHN9 | Ras-related protein Rab-35                                                                                                                                                                                                 | Rab35                                 | 17   | 59   | 3   | 2   |
| P61164 | Alpha-centractin (Centractin) (Centrosome-associated actin homolog) (Actin-RPV) (ARP1)                                                                                                                                     | Actr1a (Ctrn1)                        | 247  | 124  | 27  | 18  |
| P68033 | Actin, alpha cardiac muscle 1 (Alpha-cardiac actin)                                                                                                                                                                        | Actc1 (Actc)                          | 3948 | 2726 | 234 | 155 |
| P42932 | T-complex protein 1 subunit theta (TCP-1-theta) (CCT-theta)                                                                                                                                                                | Cct8 (Cctq)                           | 197  | 57   | 23  | 15  |
| P61161 | Actin-related protein 2 (Actin-like protein 2)                                                                                                                                                                             | Actr2 (Arp2)                          | 247  | 124  | 28  | 18  |

|        |                                                                                                                                                                                                                               |                              |     |     |    |    |
|--------|-------------------------------------------------------------------------------------------------------------------------------------------------------------------------------------------------------------------------------|------------------------------|-----|-----|----|----|
| Q8CG48 | Structural maintenance of chromosomes protein 2 (Chromosome-associated protein E) (XCAP-E homolog) (FGF-inducible protein 16)                                                                                                 | Smc2 (Cape) (Fin16) (Smc2l1) | 32  | 36  | 41 | 26 |
| Q8C7H1 | Methylmalonic aciduria type A homolog, mitochondrial                                                                                                                                                                          | Mmaa                         | 31  | 37  | 16 | 10 |
| P17156 | Heat shock-related 70 kDa protein 2 (Heat shock protein 70.2)                                                                                                                                                                 | Hspa2 (Hcp70.2) (Hsp70-2)    | 964 | 544 | 60 | 37 |
| Q61879 | Myosin-10 (Myosin heavy chain 10) (Myosin heavy chain, non-muscle IIb) (Non-muscle myosin heavy chain IIb) (NMMHC II-b) (NMMHC-IIB) (Cellular myosin heavy chain, type B) (Non-muscle myosin heavy chain-B) (NMMHC-B)         | Myh10                        | 122 | 101 | 65 | 40 |
| Q9Z0P5 | Twinfilin-2 (Twinfilin-1-like protein) (A6-related protein) (mA6RP)                                                                                                                                                           | Twf2 (Ptk9l)                 | 29  | 32  | 10 | 6  |
| Q9QWK5 | Baculoviral IAP repeat-containing protein 1a (Neuronal apoptosis inhibitory protein 1)                                                                                                                                        | Naip1 (Birc1a) (Naip)        | 21  | 28  | 20 | 12 |
| Q9EQZ6 | Rap guanine nucleotide exchange factor 4 (cAMP-regulated guanine nucleotide exchange factor II) (cAMP-GEFII) (Exchange factor directly activated by cAMP 2) (Epac 2) (cAMP-dependent Rap1 guanine-nucleotide exchange factor) | Rapgef4 (Cgef2) (Epac2)      | 47  | 23  | 20 | 12 |
| P63038 | 60 kDa heat shock protein, mitochondrial (Heat shock protein 60) (HSP-60) (Hsp60) (60 kDa chaperonin) (Chaperonin 60) (CPN60) (Mitochondrial matrix protein P1) (HSP-65)                                                      | Hspd1 (Hsp60)                | 15  | 32  | 22 | 13 |
| P80317 | T-complex protein 1 subunit zeta (TCP-1-zeta) (CCT-zeta) (CCT-zeta-1)                                                                                                                                                         | Cct6a (Cct6) (Cctz) (Cctz1)  | 160 | 52  | 22 | 13 |

|             |        |                                                                                                                                                                                                                                     |                           |      |     |     |    |
|-------------|--------|-------------------------------------------------------------------------------------------------------------------------------------------------------------------------------------------------------------------------------------|---------------------------|------|-----|-----|----|
|             | P10630 | Eukaryotic initiation factor 4A-II (eIF-4A-II) (eIF4A-II) (EC 3.6.1.-) (ATP-dependent RNA helicase eIF4A-2)                                                                                                                         | Eif4a2 (Ddx2b)            | 194  | 78  | 17  | 10 |
|             | P09041 | Phosphoglycerate kinase 2 (EC 2.7.2.3) (Phosphoglycerate kinase, testis specific)                                                                                                                                                   | Pgk2 (Pgk-2)              | 162  | 73  | 17  | 10 |
|             | P63017 | Heat shock cognate 71 kDa protein (Heat shock 70 kDa protein 8)                                                                                                                                                                     | Hspa8 (Hsc70) (Hsc73)     | 1719 | 959 | 119 | 70 |
|             | P05532 | Mast/stem cell growth factor receptor (SCFR) (EC 2.7.10.1) (Proto-oncogene tyrosine-protein kinase Kit) (c-kit) (CD antigen CD117)                                                                                                  | Kit (Sl)                  | 16   | 35  | 12  | 7  |
|             | Q9QUK4 | Baculoviral IAP repeat-containing protein 1b (Neuronal apoptosis inhibitory protein 2)                                                                                                                                              | Naip2 (Birc1b) (Naip-rs6) | 21   | 28  | 14  | 8  |
|             | Q8K2I9 | F-box only protein 18 (EC 3.6.1.-) (F-box DNA helicase 1)                                                                                                                                                                           | Fbxo18 (Fbh1) (Fbx18)     | 30   | 23  | 9   | 5  |
|             | Q8BYH8 | Chromodomain-helicase-DNA-binding protein 9 (CHD-9) (EC 3.6.1.-) (ATP-dependent helicase CHD9) (Peroxisomal proliferator-activated receptor A-interacting complex 320 kDa protein) (PPAR-alpha-interacting complex protein 320 kDa) | Chd9 (Kiaa0308) (Pric320) | 39   | 27  | 49  | 27 |
|             | Q9WTU3 | Sodium channel protein type 8 subunit alpha (Sodium channel protein type VIII subunit alpha) (Voltage-gated sodium channel subunit alpha Nav1.6)                                                                                    | Scn8a (Nbna1)             | 28   | 19  | 20  | 11 |
|             | Q61390 | T-complex protein 1 subunit zeta-2 (TCP-1-zeta-2) (CCT-zeta-2) (Cctz-2)                                                                                                                                                             | Cct6b                     | 55   | 52  | 15  | 8  |
|             | Q80UE6 | Serine/threonine-protein kinase WNK4 (EC 2.7.11.1) (Protein kinase with no lysine 4) (Protein kinase, lysine-deficient 4)                                                                                                           | Wnk4 (Prkwnk4)            | 23   | 33  | 29  | 15 |
| ATP binding | P97311 | DNA replication licensing factor MCM6 (Mis5 homolog)                                                                                                                                                                                | Mcm6 (Mcmd6) (Mis5)       | 110  | 395 | 20  | 38 |

|        |                                                                                                                                                                          |                      |     |     |    |    |
|--------|--------------------------------------------------------------------------------------------------------------------------------------------------------------------------|----------------------|-----|-----|----|----|
| Q8BYC6 | Serine/threonine-protein kinase TAO3 (EC 2.7.11.1) (Thousand and one amino acid protein 3)                                                                               | Taok3                | 32  | 38  | 9  | 16 |
| Q9R117 | Non-receptor tyrosine-protein kinase TYK2 (EC 2.7.10.2)                                                                                                                  | Tyk2                 | 27  | 30  | 15 | 26 |
| Q9Z129 | ATP-dependent DNA helicase Q1 (EC 3.6.1.-) (DNA-dependent ATPase Q1)                                                                                                     | Recql (Recql1)       | 17  | 27  | 13 | 22 |
| P15532 | Nucleoside diphosphate kinase A (NDP kinase A) (NDK A) (EC 2.7.4.6) (Tumor metastatic process-associated protein) (Metastasis inhibition factor NM23) (NDPK-A) (nm23-M1) | Nme1 (Nm23)          | 150 | 261 | 8  | 13 |
| Q501J6 | Probable ATP-dependent RNA helicase DDX17 (EC 3.6.1.-) (DEAD box protein 17)                                                                                             | Ddx17                | 90  | 43  | 7  | 11 |
| Q9Z1S0 | Mitotic checkpoint serine/threonine-protein kinase BUB1 beta (EC 2.7.11.1) (MAD3/BUB1-related protein kinase) (Mitotic checkpoint kinase MAD3L)                          | Bub1b (Mad3l)        | 20  | 41  | 15 | 23 |
| P83741 | Serine/threonine-protein kinase WNK1 (EC 2.7.11.1) (Protein kinase with no lysine 1) (Protein kinase, lysine-deficient 1)                                                | Wnk1 (Prkwnk1)       | 56  | 36  | 18 | 27 |
| P35761 | Dual specificity protein kinase TTK (ESK) (PYT) (EC 2.7.12.1)                                                                                                            | Ttk (Esk)            | 14  | 34  | 9  | 13 |
| Q00342 | FL cytokine receptor (EC 2.7.10.1) (Tyrosine-protein kinase receptor flk-2) (Fetal liver kinase 2) (Tyrosine-protein kinase FLT3) (CD antigen CD135)                     | Flt3 (Flk-2) (Flt3)  | 17  | 34  | 7  | 10 |
| Q9Z1F9 | SUMO-activating enzyme subunit 2 (EC 6.3.2.-) (Ubiquitin-like 1-activating enzyme E1B) (Anthracycline-associated resistance ARX)                                         | Uba2 (Sae2) (Uble1b) | 62  | 77  | 10 | 14 |
| P17047 | Lysosome-associated membrane glycoprotein 2 (LAMP-2) (Lysosomal membrane glycoprotein type B) (LGP-B) (CD107 antigen-like family member B) (CD antigen CD107b)           | Lamp2 (Lamp-2)       | 26  | 29  | 8  | 11 |

|        |                                                                                                                                                                                                                                                       |                        |     |     |    |    |
|--------|-------------------------------------------------------------------------------------------------------------------------------------------------------------------------------------------------------------------------------------------------------|------------------------|-----|-----|----|----|
| P27641 | ATP-dependent DNA helicase 2 subunit 2 (EC 3.6.1.-) (ATP-dependent DNA helicase II 80 kDa subunit) (Ku autoantigen protein p86 homolog) (Ku80) (CTC box-binding factor 85 kDa subunit) (CTCBF) (CTC85) (Nuclear factor IV) (DNA repair protein XRCC5) | Xrcc5 (G22p2)          | 22  | 29  | 16 | 22 |
| P70296 | Phosphatidylethanolamine-binding protein 1 (PEBP-1) (HCNPPp) [Cleaved into: Hippocampal cholinergic neurostimulating peptide (HCNP)]                                                                                                                  | Pebp1 (Pbp) (Pebp)     | 532 | 730 | 25 | 33 |
| Q5SXJ3 | Fanconi anemia group J protein homolog (Protein FACJ) (EC 3.6.1.-) (ATP-dependent RNA helicase BRIP1) (BRCA1-interacting protein C-terminal helicase 1) (BRCA1-interacting protein 1) (BRCA1-associated C-terminal helicase 1)                        | Brip1 (Bach1) (Fancj)  | 25  | 18  | 13 | 17 |
| Q61846 | Maternal embryonic leucine zipper kinase (EC 2.7.11.1) (Protein kinase PK38) (mPK38)                                                                                                                                                                  | Melk (Kiaa0175) (Pk38) | 28  | 32  | 10 | 13 |
| Q61496 | Probable ATP-dependent RNA helicase DDX4 (EC 3.6.1.-) (DEAD box protein 4) (Vasa homolog) (Mvh)                                                                                                                                                       | Ddx4 (Vasa)            | 17  | 25  | 44 | 56 |
| P61028 | Ras-related protein Rab-8B                                                                                                                                                                                                                            | Rab8b                  | 17  | 59  | 4  | 5  |
| Q61316 | Heat shock 70 kDa protein 4 (Heat shock 70-related protein APG-2)                                                                                                                                                                                     | Hspa4 (Apg2) (Hsp110)  | 379 | 792 | 42 | 52 |
| Q8BU30 | Isoleucyl-tRNA synthetase, cytoplasmic (EC 6.1.1.5) (Isoleucine--tRNA ligase) (IleRS) (IRS)                                                                                                                                                           | Iars                   | 85  | 46  | 30 | 37 |
| O08648 | Mitogen-activated protein kinase kinase kinase 4 (EC 2.7.11.25) (MAPK/ERK kinase kinase 4) (MEK kinase 4) (MEKK 4)                                                                                                                                    | Map3k4 (Mekk4)         | 37  | 16  | 19 | 23 |
| P49025 | Citron Rho-interacting kinase (CRIK) (EC 2.7.11.1) (Rho-interacting, serine/threonine-protein kinase 21)                                                                                                                                              | Cit                    | 49  | 67  | 67 | 81 |

|        |                                                                                                                                                                                                         |                         |    |    |     |     |
|--------|---------------------------------------------------------------------------------------------------------------------------------------------------------------------------------------------------------|-------------------------|----|----|-----|-----|
| Q60848 | Lymphocyte-specific helicase (EC 3.6.1.-)<br>(Proliferation associated SNF2-like protein)                                                                                                               | Hells (Lsh)<br>(Pasg)   | 37 | 35 | 10  | 12  |
| P80315 | T-complex protein 1 subunit delta (TCP-1-<br>delta) (CCT-delta) (A45)                                                                                                                                   | Cct4 (Cctd)             | 61 | 59 | 15  | 18  |
| Q60575 | Kinesin-like protein KIF1B                                                                                                                                                                              | Kif1b                   | 45 | 95 | 30  | 36  |
| Q61771 | Kinesin-like protein KIF3B (Microtubule plus<br>end-directed kinesin motor 3B)                                                                                                                          | Kif3b                   | 30 | 51 | 16  | 19  |
| Q9R0K7 | Plasma membrane calcium-transporting<br>ATPase 2 (PMCA2) (EC 3.6.3.8) (Plasma<br>membrane calcium ATPase isoform 2)<br>(Plasma membrane calcium pump isoform 2)                                         | Atp2b2<br>(Pmca2)       | 32 | 27 | 70  | 83  |
| P80313 | T-complex protein 1 subunit eta (TCP-1-eta)<br>(CCT-eta)                                                                                                                                                | Cct7 (Ccth)             | 49 | 50 | 11  | 13  |
| P49718 | DNA replication licensing factor MCM5<br>(CDC46 homolog) (P1-CDC46)                                                                                                                                     | Mcm5 (Cdc46)<br>(Mcmd5) | 40 | 20 | 18  | 21  |
| P97820 | Mitogen-activated protein kinase kinase kinase<br>kinase 4 (EC 2.7.11.1) (MAPK/ERK kinase<br>kinase kinase 4) (MEK kinase kinase 4)<br>(MEKKK 4) (HPK/GCK-like kinase HGK) (Nck-<br>interacting kinase) | Map4k4 (Nik)            | 65 | 54 | 15  | 17  |
| P26618 | Alpha-type platelet-derived growth factor<br>receptor (EC 2.7.10.1) (PDGF-R-alpha)<br>(CD140 antigen-like family member A) (CD<br>antigen CD140a)                                                       | Pdgfra                  | 37 | 73 | 160 | 178 |
| P49717 | DNA replication licensing factor MCM4<br>(CDC21 homolog) (P1-CDC21)                                                                                                                                     | Mcm4 (Cdc21)<br>(Mcmd4) | 29 | 18 | 11  | 12  |
| Q3THS6 | S-adenosylmethionine synthetase isoform type-<br>2 (AdoMet synthetase 2) (EC 2.5.1.6)<br>(Methionine adenosyltransferase 2)                                                                             | Mat2a                   | 26 | 42 | 11  | 12  |
| Q99KK9 | Probable histidyl-tRNA synthetase,<br>mitochondrial (EC 6.1.1.21) (Histidine--tRNA<br>ligase) (HisRS) (Histidine--tRNA ligase-like)                                                                     | Hars2 (Harsl)           | 20 | 41 | 22  | 24  |

|        |                                                                                                                                                                                                                                       |                                    |      |      |     |     |
|--------|---------------------------------------------------------------------------------------------------------------------------------------------------------------------------------------------------------------------------------------|------------------------------------|------|------|-----|-----|
| P07901 | Heat shock protein HSP 90-alpha (HSP 86) (Tumor-specific transplantation 86 kDa antigen) (TSTA)                                                                                                                                       | Hsp90aa1 (Hsp86) (Hsp86-1) (Hspca) | 1529 | 2324 | 134 | 146 |
| P38647 | Stress-70 protein, mitochondrial (75 kDa glucose-regulated protein) (GRP 75) (Heat shock 70 kDa protein 9) (Peptide-binding protein 74) (PBP74) (P66 MOT) (Mortalin)                                                                  | Hspa9 (Grp75) (Hsp74) (Hspa9a)     | 33   | 33   | 12  | 13  |
| P08113 | Endoplasmic reticulum chaperone protein (Heat shock protein 90 kDa beta member 1) (94 kDa glucose-regulated protein) (GRP94) (ERP99) (Polymorphic tumor rejection antigen 1) (Tumor rejection antigen gp96)                           | Hsp90b1 (Tra-1) (Tra1)             | 221  | 298  | 25  | 27  |
| Q9Z104 | SWI/SNF-related matrix-associated actin-dependent regulator of chromatin subfamily E member 1-related (SMARCE1-related protein) (HMG box-containing protein 20B) (Structural DNA-binding protein BRAF35) (BRCA2-associated factor 35) | Hmg20b (Braf35) (Hmgx2) (Smarce1r) | 30   | 20   | 14  | 15  |
| P11984 | T-complex protein 1 subunit alpha A (TCP-1-alpha) (CCT-alpha) (Tailless complex polypeptide 1A) (TCP-1-A)                                                                                                                             | Cct1 (Ccta) (Tcp1)                 | 29   | 66   | 14  | 15  |
| P30416 | FK506-binding protein 4 (EC 5.2.1.8) (Peptidyl-prolyl cis-trans isomerase) (PPIase) (Rotamase) (HSP-binding immunophilin) (HBI) (FKBP52 protein) (52 kDa FK506-binding protein) (FKBP59) (p59 protein)                                | Fkbp4                              | 40   | 62   | 8   | 8   |
| Q8C0N1 | Kinesin-like protein KIF2B                                                                                                                                                                                                            | Kif2b                              | 17   | 26   | 8   | 8   |
| Q80YV4 | Pantothenate kinase 4 (EC 2.7.1.33) (Pantothenic acid kinase 4) (mPanK4)                                                                                                                                                              | Pank4                              | 23   | 28   | 13  | 13  |
| P25206 | DNA replication licensing factor MCM3 (DNA polymerase alpha holoenzyme-associated protein P1) (P1-MCM3)                                                                                                                               | Mcm3 (Mcmd) (Mcmd3)                | 74   | 185  | 15  | 15  |
| Q8R4K2 | Interleukin-1 receptor-associated kinase 4 (IRAK-4) (EC 2.7.11.1)                                                                                                                                                                     | Irak4                              | 32   | 47   | 22  | 22  |

|        |                                                                                                                                                                                                              |                                        |      |      |     |     |
|--------|--------------------------------------------------------------------------------------------------------------------------------------------------------------------------------------------------------------|----------------------------------------|------|------|-----|-----|
| Q6P8J7 | Creatine kinase, sarcomeric mitochondrial (EC 2.7.3.2) (S-MtCK)                                                                                                                                              | Ckmt2                                  | 50   | 66   | 26  | 26  |
| P11499 | Heat shock protein HSP 90-beta (HSP 84) (Tumor-specific transplantation 84 kDa antigen) (TSTA)                                                                                                               | Hsp90ab1 (Hsp84) (Hsp84-1) (Hspcb)     | 2943 | 3523 | 208 | 205 |
| O08638 | Myosin-11 (Myosin heavy chain 11) (Myosin heavy chain, smooth muscle isoform) (SMMHC)                                                                                                                        | Myh11                                  | 211  | 221  | 79  | 76  |
| Q9QXL1 | Kinesin-like protein KIF21B (Kinesin-like protein KIF6)                                                                                                                                                      | Kif21b (Kif6)                          | 22   | 45   | 26  | 25  |
| Q8R4B8 | NACHT, LRR and PYD domains-containing protein 3 (Cold autoinflammatory syndrome 1 protein homolog) (Cryopyrin) (PYRIN-containing APAF1-like protein 1) (Mast cell maturation-associated-inducible protein 1) | Nlrp3 (Cias1) (Mmig1) (Nalp3) (Pypaf1) | 30   | 20   | 24  | 23  |
| Q8BGQ7 | Alanyl-tRNA synthetase, cytoplasmic (EC 6.1.1.7) (Alanine--tRNA ligase) (AlaRS)                                                                                                                              | Aars                                   | 179  | 216  | 23  | 22  |
| Q91V92 | ATP-citrate synthase (EC 2.3.3.8) (ATP-citrate (pro-S)-lyase) (Citrate cleavage enzyme)                                                                                                                      | Acly                                   | 349  | 488  | 45  | 43  |
| Q61768 | Kinesin-1 heavy chain (Ubiquitous kinesin heavy chain) (UKHC) (Conventional kinesin heavy chain)                                                                                                             | Kif5b (Khcs) (Kns1)                    | 102  | 303  | 43  | 41  |
| P30275 | Creatine kinase, ubiquitous mitochondrial (EC 2.7.3.2) (U-MtCK) (Acidic-type mitochondrial creatine kinase) (Mia-CK)                                                                                         | Ckmt1                                  | 205  | 121  | 32  | 30  |
| Q04447 | Creatine kinase B-type (EC 2.7.3.2) (Creatine kinase B chain) (B-CK)                                                                                                                                         | Ckb (Ckbb)                             | 9079 | 7277 | 434 | 406 |
| P35969 | Vascular endothelial growth factor receptor 1 (VEGFR-1) (EC 2.7.10.1) (Tyrosine-protein kinase receptor FLT) (FLT-1) (Embryonic receptor kinase 2)                                                           | Flt1 (Emrk2) (Flt)                     | 29   | 36   | 35  | 32  |
| Q01853 | Transitional endoplasmic reticulum ATPase (TER ATPase) (15S Mg(2+)-ATPase p97 subunit) (Valosin-containing protein) (VCP)                                                                                    | Vcp                                    | 691  | 699  | 56  | 51  |



|        |                                                                                                                                                                                                                     |                                    |     |      |     |     |
|--------|---------------------------------------------------------------------------------------------------------------------------------------------------------------------------------------------------------------------|------------------------------------|-----|------|-----|-----|
| Q8CGC7 | Bifunctional aminoacyl-tRNA synthetase [Includes: Glutamyl-tRNA synthetase (EC 6.1.1.17) (Glutamate--tRNA ligase); Prolyl-tRNA synthetase (EC 6.1.1.15) (Proline--tRNA ligase)]                                     | Eprs (Qprs)                        | 130 | 102  | 32  | 29  |
| Q8VDD5 | Myosin-9 (Myosin heavy chain 9) (Myosin heavy chain, non-muscle IIa) (Non-muscle myosin heavy chain IIa) (NMMHC II-a) (NMMHC-IIA) (Cellular myosin heavy chain, type A) (Non-muscle myosin heavy chain-A) (NMMHC-A) | Myh9                               | 780 | 839  | 127 | 115 |
| P07310 | Creatine kinase M-type (EC 2.7.3.2) (Creatine kinase M chain) (M-CK)                                                                                                                                                | Ckm (Ckmm)                         | 73  | 107  | 31  | 28  |
| Q99104 | Myosin-Va (Dilute myosin heavy chain, non-muscle)                                                                                                                                                                   | Myo5a (Dilute)                     | 28  | 34   | 35  | 31  |
| P33173 | Kinesin-like protein KIF1A (Axonal transporter of synaptic vesicles)                                                                                                                                                | Kif1a (Atsv) (Kif1)                | 45  | 108  | 25  | 22  |
| Q02053 | Ubiquitin-like modifier-activating enzyme 1 (Ubiquitin-activating enzyme E1) (Ubiquitin-like modifier-activating enzyme 1 X) (Ubiquitin-activating enzyme E1 X)                                                     | Uba1 (Sbx) (Ube1) (Ube1ax) (Ube1x) | 660 | 1086 | 63  | 55  |
| Q8VHE6 | Dynein heavy chain 5, axonemal (Axonemal beta dynein heavy chain 5) (Mdnah5) (Ciliary dynein heavy chain 5)                                                                                                         | Dnah5 (Dnahc5)                     | 47  | 44   | 83  | 72  |
| Q9Z1Q9 | Valyl-tRNA synthetase (EC 6.1.1.9) (Valine--tRNA ligase) (ValRS) (Protein G7a)                                                                                                                                      | Vars (Bat6) (G7a) (Vars2)          | 380 | 302  | 37  | 32  |
| O88866 | Hormonally up-regulated neu tumor-associated kinase (EC 2.7.11.1) (Serine/threonine-protein kinase MAK-V)                                                                                                           | Hunk (Makv)                        | 27  | 21   | 14  | 12  |
| Q9JM52 | Misshapen-like kinase 1 (EC 2.7.11.1) (Mitogen-activated protein kinase kinase kinase 6) (MAPK/ERK kinase kinase 6) (MEK kinase 6) (MEKKK 6) (Misshapen/NIK-related kinase) (GCK family kinase MiNK)                | Mink1 (Map4k6) (Mink)              | 18  | 54   | 13  | 11  |

|        |                                                                                                                                                                                                                                                                |                         |     |     |    |    |
|--------|----------------------------------------------------------------------------------------------------------------------------------------------------------------------------------------------------------------------------------------------------------------|-------------------------|-----|-----|----|----|
| Q9CQN1 | Heat shock protein 75 kDa, mitochondrial (HSP 75) (Tumor necrosis factor type 1 receptor-associated protein) (TRAP-1) (TNFR-associated protein 1)                                                                                                              | Trap1 (Hsp75)           | 197 | 335 | 13 | 11 |
| P20029 | 78 kDa glucose-regulated protein (GRP 78) (Heat shock 70 kDa protein 5) (Immunoglobulin heavy chain-binding protein) (BiP)                                                                                                                                     | Hspa5 (Grp78)           | 262 | 312 | 25 | 21 |
| P11983 | T-complex protein 1 subunit alpha B (TCP-1-alpha) (CCT-alpha) (Tailless complex polypeptide 1B) (TCP-1-B)                                                                                                                                                      | Cct1 (Ccta) (Tcp1)      | 29  | 66  | 18 | 15 |
| Q91XQ0 | Dynein heavy chain 8, axonemal (Axonemal beta dynein heavy chain 8) (Ciliary dynein heavy chain 8)                                                                                                                                                             | Dnahc8                  | 47  | 51  | 77 | 64 |
| Q6URW6 | Myosin-14 (Myosin heavy chain 14) (Myosin heavy chain, non-muscle IIc) (Non-muscle myosin heavy chain IIc) (NMHC II-C)                                                                                                                                         | Myh14                   | 60  | 48  | 53 | 44 |
| Q8R429 | Sarcoplasmic/endoplasmic reticulum calcium ATPase 1 (SERCA1) (EC 3.6.3.8) (Calcium pump 1) (Calcium-transporting ATPase sarcoplasmic reticulum type, fast twitch skeletal muscle isoform) (SR Ca(2+)-ATPase 1) (Endoplasmic reticulum class 1/2 Ca(2+) ATPase) | Atp2a1                  | 25  | 17  | 17 | 14 |
| P80316 | T-complex protein 1 subunit epsilon (TCP-1-epsilon) (CCT-epsilon)                                                                                                                                                                                              | Cct5 (Ccte) (Kiaa0098)  | 239 | 102 | 17 | 14 |
| Q569Z5 | Probable ATP-dependent RNA helicase DDX46 (EC 3.6.1.-) (DEAD box protein 46)                                                                                                                                                                                   | Ddx46 (Kiaa0801)        | 25  | 17  | 21 | 17 |
| Q80ZW0 | Serine/threonine-protein kinase 35 (EC 2.7.11.1)                                                                                                                                                                                                               | Stk35                   | 14  | 50  | 21 | 17 |
| Q62407 | Striated muscle-specific serine/threonine protein kinase (EC 2.7.11.1) (Aortic preferentially expressed protein 1) (APEG-1)                                                                                                                                    | Speg (Apeg1) (Kiaa1297) | 26  | 20  | 31 | 25 |

|        |                                                                                                                                                      |                                        |     |     |     |     |
|--------|------------------------------------------------------------------------------------------------------------------------------------------------------|----------------------------------------|-----|-----|-----|-----|
| Q8VI47 | Canalicular multispecific organic anion transporter 1 (ATP-binding cassette sub-family C member 2)                                                   | Abcc2                                  | 31  | 38  | 39  | 31  |
| Q8C196 | Carbamoyl-phosphate synthase [ammonia], mitochondrial (EC 6.3.4.16) (Carbamoyl-phosphate synthetase I) (CPSase I)                                    | Cps1                                   | 22  | 25  | 19  | 15  |
| Q80UN9 | tRNA isopentenyltransferase, mitochondrial (IPTase) (EC 2.5.1.8) (Isopentenyl-diphosphate:tRNA isopentenyltransferase) (IPP transferase) (IPPT)      | Trit1 (lpt)                            | 31  | 24  | 19  | 15  |
| Q9JHU4 | Cytoplasmic dynein 1 heavy chain 1 (Cytoplasmic dynein heavy chain 1) (Dynein heavy chain, cytosolic)                                                | Dync1h1 (Dhc1) (Dnch1) (Dnchc1) (Dyhc) | 822 | 395 | 157 | 123 |
| P31254 | Ubiquitin-like modifier-activating enzyme 1 Y (Ubiquitin-activating enzyme E1 Y) (Ubiquitin-activating enzyme E1)                                    | Ube1ay (Sby) (Ube1y) (Ube1y1)          | 161 | 77  | 22  | 17  |
| Q8CGK3 | Lon protease homolog, mitochondrial (EC 3.4.21.-) (Lon protease-like protein) (LONP) (Mitochondrial ATP-dependent protease Lon) (Serine protease 15) | Lonp1 (Prss15)                         | 21  | 30  | 43  | 33  |
| Q8JZQ2 | AFG3-like protein 2 (EC 3.4.24.-)                                                                                                                    | Afg3l2                                 | 15  | 27  | 17  | 13  |
| Q569Z6 | Thyroid hormone receptor-associated protein 3 (Thyroid hormone receptor-associated protein complex 150 kDa component) (Trap150)                      | Thrap3 (Trap150)                       | 29  | 48  | 21  | 16  |
| P16627 | Heat shock 70 kDa protein 1L (Heat shock 70 kDa protein 1-like) (Heat shock 70 kDa-like protein 1) (Spermatid-specific heat shock protein 70)        | Hspa1l (Hsc70t)                        | 319 | 238 | 33  | 25  |
| O70228 | Probable phospholipid-transporting ATPase IIA (EC 3.6.3.1) (ATPase class II type 9A)                                                                 | Atp9a                                  | 31  | 29  | 37  | 28  |
| P56480 | ATP synthase subunit beta, mitochondrial (EC 3.6.3.14)                                                                                               | Atp5b                                  | 31  | 50  | 8   | 6   |

|        |                                                                                                                                                                                                                            |                                       |      |      |     |     |
|--------|----------------------------------------------------------------------------------------------------------------------------------------------------------------------------------------------------------------------------|---------------------------------------|------|------|-----|-----|
| Q02956 | Protein kinase C zeta type (EC 2.7.11.13) (nPKC-zeta)                                                                                                                                                                      | Prkcz (PkcZ)                          | 29   | 15   | 8   | 6   |
| Q9DBP5 | UMP-CMP kinase (EC 2.7.4.14) (Cytidylate kinase) (Deoxycytidylate kinase) (Cytidine monophosphate kinase) (Uridine monophosphate kinase) (Uridine monophosphate/cytidine monophosphate kinase) (UMP/CMP kinase) (UMP/CMPK) | Cmpk1 (Cmk) (Cmpk) (Uck) (Umk) (Umpk) | 107  | 93   | 12  | 9   |
| Q8K045 | Serine/threonine-protein kinase N3 (EC 2.7.11.13) (Protein kinase PKN-beta) (Protein-kinase C-related kinase 3)                                                                                                            | Pkn3 (Pknbeta)                        | 130  | 126  | 36  | 27  |
| P60710 | Actin, cytoplasmic 1 (Beta-actin)                                                                                                                                                                                          | Actb                                  | 5140 | 4496 | 282 | 208 |
| Q61656 | Probable ATP-dependent RNA helicase DDX5 (EC 3.6.1.-) (DEAD box protein 5) (RNA helicase p68) (DEAD box RNA helicase DEAD1) (mDEAD1)                                                                                       | Ddx5 (Tnz2)                           | 90   | 43   | 11  | 8   |
| Q61696 | Heat shock 70 kDa protein 1A (Heat shock 70 kDa protein 3) (HSP70.3) (Hsp68)                                                                                                                                               | Hspa1a (Hsp70-3) (Hsp70A1)            | 266  | 236  | 33  | 24  |
| Q61699 | Heat shock protein 105 kDa (Heat shock-related 100 kDa protein E7I) (HSP-E7I) (Heat shock 110 kDa protein) (42 degrees C-HSP)                                                                                              | Hsph1 (Hsp105) (Hsp110) (Kiaa0201)    | 46   | 48   | 18  | 13  |
| Q8BMJ2 | Leucyl-tRNA synthetase, cytoplasmic (EC 6.1.1.4) (Leucine--tRNA ligase) (LeuRS)                                                                                                                                            | Lars                                  | 52   | 45   | 47  | 33  |
| Q6PHN9 | Ras-related protein Rab-35                                                                                                                                                                                                 | Rab35                                 | 17   | 59   | 3   | 2   |
| P61164 | Alpha-centractin (Centractin) (Centrosome-associated actin homolog) (Actin-RPV) (ARP1)                                                                                                                                     | Actr1a (Ctrn1)                        | 247  | 124  | 27  | 18  |
| P68033 | Actin, alpha cardiac muscle 1 (Alpha-cardiac actin)                                                                                                                                                                        | Actc1 (Actc)                          | 3948 | 2726 | 234 | 155 |
| P42932 | T-complex protein 1 subunit theta (TCP-1-theta) (CCT-theta)                                                                                                                                                                | Cct8 (Cctq)                           | 197  | 57   | 23  | 15  |
| P61161 | Actin-related protein 2 (Actin-like protein 2)                                                                                                                                                                             | Actr2 (Arp2)                          | 247  | 124  | 28  | 18  |

|        |                                                                                                                                                                                                                       |                              |      |     |     |    |
|--------|-----------------------------------------------------------------------------------------------------------------------------------------------------------------------------------------------------------------------|------------------------------|------|-----|-----|----|
| Q8CG48 | Structural maintenance of chromosomes protein 2 (Chromosome-associated protein E) (XCAP-E homolog) (FGF-inducible protein 16)                                                                                         | Smc2 (Cape) (Fin16) (Smc2l1) | 32   | 36  | 41  | 26 |
| Q8C7H1 | Methylmalonic aciduria type A homolog, mitochondrial                                                                                                                                                                  | Mmaa                         | 31   | 37  | 16  | 10 |
| P17156 | Heat shock-related 70 kDa protein 2 (Heat shock protein 70.2)                                                                                                                                                         | Hspa2 (Hcp70.2) (Hsp70-2)    | 964  | 544 | 60  | 37 |
| Q61879 | Myosin-10 (Myosin heavy chain 10) (Myosin heavy chain, non-muscle IIb) (Non-muscle myosin heavy chain IIb) (NMMHC II-b) (NMMHC-IIB) (Cellular myosin heavy chain, type B) (Non-muscle myosin heavy chain-B) (NMMHC-B) | Myh10                        | 122  | 101 | 65  | 40 |
| Q9Z0P5 | Twinfilin-2 (Twinfilin-1-like protein) (A6-related protein) (mA6RP)                                                                                                                                                   | Twf2 (Ptk9l)                 | 29   | 32  | 10  | 6  |
| Q9QWK5 | Baculoviral IAP repeat-containing protein 1a (Neuronal apoptosis inhibitory protein 1)                                                                                                                                | Naip1 (Birc1a) (Naip)        | 21   | 28  | 20  | 12 |
| P63038 | 60 kDa heat shock protein, mitochondrial (Heat shock protein 60) (HSP-60) (Hsp60) (60 kDa chaperonin) (Chaperonin 60) (CPN60) (Mitochondrial matrix protein P1) (HSP-65)                                              | Hspd1 (Hsp60)                | 15   | 32  | 22  | 13 |
| P80317 | T-complex protein 1 subunit zeta (TCP-1-zeta) (CCT-zeta) (CCT-zeta-1)                                                                                                                                                 | Cct6a (Cct6) (Cctz) (Cctz1)  | 160  | 52  | 22  | 13 |
| P10630 | Eukaryotic initiation factor 4A-II (eIF-4A-II) (eIF4A-II) (EC 3.6.1.-) (ATP-dependent RNA helicase eIF4A-2)                                                                                                           | Eif4a2 (Ddx2b)               | 194  | 78  | 17  | 10 |
| P09041 | Phosphoglycerate kinase 2 (EC 2.7.2.3) (Phosphoglycerate kinase, testis specific)                                                                                                                                     | Pgk2 (Pgk-2)                 | 162  | 73  | 17  | 10 |
| P63017 | Heat shock cognate 71 kDa protein (Heat shock 70 kDa protein 8)                                                                                                                                                       | Hspa8 (Hsc70) (Hsc73)        | 1719 | 959 | 119 | 70 |

|                              |        |                                                                                                                                                                                                                                     |                           |     |     |    |    |
|------------------------------|--------|-------------------------------------------------------------------------------------------------------------------------------------------------------------------------------------------------------------------------------------|---------------------------|-----|-----|----|----|
|                              | P05532 | Mast/stem cell growth factor receptor (SCFR) (EC 2.7.10.1) (Proto-oncogene tyrosine-protein kinase Kit) (c-kit) (CD antigen CD117)                                                                                                  | Kit (SI)                  | 16  | 35  | 12 | 7  |
|                              | Q9QUK4 | Baculoviral IAP repeat-containing protein 1b (Neuronal apoptosis inhibitory protein 2)                                                                                                                                              | Naip2 (Birc1b) (Naip-rs6) | 21  | 28  | 14 | 8  |
|                              | Q8K2I9 | F-box only protein 18 (EC 3.6.1.-) (F-box DNA helicase 1)                                                                                                                                                                           | Fbxo18 (Fbh1) (Fbx18)     | 30  | 23  | 9  | 5  |
|                              | Q8BYH8 | Chromodomain-helicase-DNA-binding protein 9 (CHD-9) (EC 3.6.1.-) (ATP-dependent helicase CHD9) (Peroxisomal proliferator-activated receptor A-interacting complex 320 kDa protein) (PPAR-alpha-interacting complex protein 320 kDa) | Chd9 (Kiaa0308) (Pric320) | 39  | 27  | 49 | 27 |
|                              | Q9WTU3 | Sodium channel protein type 8 subunit alpha (Sodium channel protein type VIII subunit alpha) (Voltage-gated sodium channel subunit alpha Nav1.6)                                                                                    | Scn8a (Nbna1)             | 28  | 19  | 20 | 11 |
|                              | Q61390 | T-complex protein 1 subunit zeta-2 (TCP-1-zeta-2) (CCT-zeta-2) (Cctz-2)                                                                                                                                                             | Cct6b                     | 55  | 52  | 15 | 8  |
|                              | Q80UE6 | Serine/threonine-protein kinase WNK4 (EC 2.7.11.1) (Protein kinase with no lysine 4) (Protein kinase, lysine-deficient 4)                                                                                                           | Wnk4 (Prkwnk4)            | 23  | 33  | 29 | 15 |
| structural molecule activity | P04104 | Keratin, type II cytoskeletal 1 (Cytokeratin-1) (CK-1) (Keratin-1) (K1) (67 kDa cyokeratin) (Krt1 protein)                                                                                                                          | Krt1 (Krt2-1)             | 87  | 124 | 14 | 27 |
|                              | Q61414 | Keratin, type I cytoskeletal 15 (Cytokeratin-15) (CK-15) (Keratin-15) (K15)                                                                                                                                                         | Krt15 (Krt1-15)           | 37  | 46  | 4  | 7  |
|                              | P35980 | 60S ribosomal protein L18                                                                                                                                                                                                           | Rpl18                     | 32  | 22  | 51 | 85 |
|                              | Q922U2 | Keratin, type II cytoskeletal 5 (Cytokeratin-5) (CK-5) (Keratin-5) (K5)                                                                                                                                                             | Krt5 (Krt2-5)             | 396 | 550 | 23 | 38 |
|                              | P62082 | 40S ribosomal protein S7                                                                                                                                                                                                            | Rps7                      | 104 | 126 | 9  | 14 |
|                              | O55142 | 60S ribosomal protein L35a                                                                                                                                                                                                          | Rpl35a                    | 24  | 50  | 4  | 6  |

|        |                                                                                                               |                                |      |      |     |     |
|--------|---------------------------------------------------------------------------------------------------------------|--------------------------------|------|------|-----|-----|
| P07744 | Keratin, type II cytoskeletal 4 (Cytokeratin-4) (CK-4) (Keratin-4) (K4) (Cytoskeletal 57 kDa keratin)         | Krt4 (Krt2-4)                  | 36   | 74   | 19  | 27  |
| P05214 | Tubulin alpha-3 chain (Tubulin alpha-3/alpha-7 chain) (Alpha-tubulin 3/7) (Alpha-tubulin isotype M-alpha-3/7) | Tuba3a (Tuba3); Tuba3b (Tuba7) | 1112 | 1288 | 61  | 84  |
| Q99M73 | Keratin, type II cuticular Hb4 (Type II hair keratin Hb4) (Keratin-84) (K84) (65 kDa type II keratin)         | Krt84 (Krt2-16) (Krtthb4)      | 36   | 74   | 14  | 19  |
| Q61789 | Laminin subunit alpha-3 (Nicein subunit alpha)                                                                | Lama3                          | 26   | 26   | 37  | 50  |
| P20152 | Vimentin                                                                                                      | Vim                            | 1749 | 2397 | 125 | 157 |
| P31001 | Desmin                                                                                                        | Des                            | 169  | 224  | 25  | 31  |
| P05784 | Keratin, type I cytoskeletal 18 (Cytokeratin-18) (CK-18) (Keratin-18) (K18) (Cytokeratin endo B) (Keratin D)  | Krt18 (Kerd) (Krt1-18)         | 37   | 46   | 10  | 12  |
| Q9Z2K1 | Keratin, type I cytoskeletal 16 (Cytokeratin-16) (CK-16) (Keratin-16) (K16)                                   | Krt16 (Krt1-16)                | 37   | 37   | 7   | 8   |
| P62270 | 40S ribosomal protein S18 (Ke-3) (Ke3)                                                                        | Rps18                          | 210  | 209  | 15  | 17  |
| P62908 | 40S ribosomal protein S3                                                                                      | Rps3                           | 778  | 762  | 39  | 44  |
| P19253 | 60S ribosomal protein L13a (Transplantation antigen P198) (Tum-P198 antigen)                                  | Rpl13a (P198) (Tstap198-7)     | 27   | 65   | 9   | 10  |
| P19001 | Keratin, type I cytoskeletal 19 (Cytokeratin-19) (CK-19) (Keratin-19) (K19)                                   | Krt19 (Krt1-19)                | 37   | 46   | 11  | 12  |
| P62242 | 40S ribosomal protein S8                                                                                      | Rps8                           | 479  | 372  | 18  | 19  |
| P62281 | 40S ribosomal protein S11                                                                                     | Rps11                          | 166  | 132  | 27  | 28  |
| P26039 | Talin-1                                                                                                       | Tln1 (Tln)                     | 123  | 161  | 41  | 42  |
| Q8R0W0 | Epiplakin                                                                                                     | Eppk1                          | 48   | 25   | 49  | 50  |
| Q61781 | Keratin, type I cytoskeletal 14 (Cytokeratin-14) (CK-14) (Keratin-14) (K14)                                   | Krt14 (Krt1-14)                | 38   | 37   | 10  | 10  |
| Q9CQ60 | 6-phosphogluconolactonase (6PGL) (EC 3.1.1.31)                                                                | Pgls                           | 148  | 41   | 11  | 11  |

|        |                                                                                                                                         |                      |     |     |    |    |
|--------|-----------------------------------------------------------------------------------------------------------------------------------------|----------------------|-----|-----|----|----|
| Q61092 | Laminin subunit gamma-2 (Laminin 5 gamma 2 subunit) (Kalinin/nicein/epiligrin 100 kDa subunit) (Laminin B2t chain)                      | Lamc2                | 33  | 29  | 13 | 13 |
| Q9JIF7 | Coatomer subunit beta (Beta-coat protein) (Beta-COP)                                                                                    | Copb1 (Copb)         | 37  | 22  | 15 | 15 |
| O08638 | Myosin-11 (Myosin heavy chain 11) (Myosin heavy chain, smooth muscle isoform) (SMMHC)                                                   | Myh11                | 211 | 221 | 79 | 76 |
| P03966 | N-myc proto-oncogene protein                                                                                                            | Mycn (Nmyc) (Nmyc1)  | 65  | 46  | 18 | 17 |
| Q9CPR4 | 60S ribosomal protein L17                                                                                                               | Rpl17                | 187 | 135 | 15 | 14 |
| P08730 | Keratin, type I cytoskeletal 13 (Cytokeratin-13) (CK-13) (Keratin-13) (K13) (47 kDa cyto keratin)                                       | Krt13 (Krt1-13)      | 37  | 46  | 13 | 12 |
| O35206 | Collagen alpha-1(XV) chain [Cleaved into: Endostatin (Endostatin-XV)]                                                                   | Col15a1              | 31  | 37  | 12 | 11 |
| P03995 | Glial fibrillary acidic protein (GFAP)                                                                                                  | Gfap                 | 63  | 90  | 22 | 20 |
| P02535 | Keratin, type I cytoskeletal 10 (Cytokeratin-10) (CK-10) (Keratin-10) (K10) (56 kDa cyto keratin) (Keratin, type I cytoskeletal 59 kDa) | Krt10 (Krt1-10)      | 252 | 152 | 19 | 17 |
| Q922G7 | Tektin-2 (Testicular tektin) (Tektin-t)                                                                                                 | Tekt2                | 25  | 26  | 9  | 8  |
| P26041 | Moesin (Membrane-organizing extension spike protein)                                                                                    | Msn                  | 136 | 127 | 44 | 39 |
| Q68FD5 | Clathrin heavy chain 1                                                                                                                  | Cltc                 | 944 | 884 | 88 | 78 |
| P67984 | 60S ribosomal protein L22 (Heparin-binding protein HBp15)                                                                               | Rpl22                | 59  | 48  | 7  | 6  |
| P35979 | 60S ribosomal protein L12                                                                                                               | Rpl12                | 208 | 389 | 14 | 12 |
| Q9CZM2 | 60S ribosomal protein L15                                                                                                               | Rpl15                | 225 | 107 | 21 | 18 |
| Q6ZWN5 | 40S ribosomal protein S9                                                                                                                | Rps9                 | 459 | 248 | 47 | 40 |
| P14131 | 40S ribosomal protein S16                                                                                                               | Rps16                | 160 | 126 | 19 | 16 |
| P11531 | Dystrophin                                                                                                                              | Dmd                  | 25  | 16  | 66 | 55 |
| P14206 | 40S ribosomal protein SA (Laminin receptor 1) (p40) (34/67 kDa laminin receptor) (37 kDa oncofetal antigen) (OFA/iLRP)                  | Rpsa (Lamr1) (P40-8) | 131 | 112 | 11 | 9  |



|        |                                                                                                                                                                                        |                                                   |      |      |     |     |
|--------|----------------------------------------------------------------------------------------------------------------------------------------------------------------------------------------|---------------------------------------------------|------|------|-----|-----|
| Q64512 | Tyrosine-protein phosphatase non-receptor type 13 (EC 3.1.3.48) (Protein tyrosine phosphatase PTP-BL) (Protein-tyrosine phosphatase RIP) (Protein tyrosine phosphatase DPZPTP) (PTP36) | Ptpn13 (Ptp14)                                    | 28   | 27   | 26  | 21  |
| Q5XJY5 | Coatomer subunit delta (Delta-coat protein) (Delta-COP) (Archain)                                                                                                                      | Arcn1 (Copd)                                      | 61   | 45   | 10  | 8   |
| P12970 | 60S ribosomal protein L7a (Surfeit locus protein 3)                                                                                                                                    | Rpl7a (Surf-3) (Surf3)                            | 111  | 31   | 15  | 12  |
| Q91ZU6 | Bullous pemphigoid antigen 1, isoforms 1/2/3/4 (BPA) (Hemidesmosomal plaque protein) (Dystonia musculorum protein) (Dystonin)                                                          | Dst (Bpag1)                                       | 78   | 38   | 126 | 100 |
| Q8BP67 | 60S ribosomal protein L24                                                                                                                                                              | Rpl24                                             | 354  | 214  | 24  | 19  |
| P62754 | 40S ribosomal protein S6 (Phosphoprotein NP33)                                                                                                                                         | Rps6                                              | 127  | 283  | 19  | 15  |
| Q9QWL7 | Keratin, type I cytoskeletal 17 (Cytokeratin-17) (CK-17) (Keratin-17) (K17)                                                                                                            | Krt17 (Krt1-17)                                   | 38   | 46   | 14  | 11  |
| P63325 | 40S ribosomal protein S10                                                                                                                                                              | Rps10                                             | 468  | 168  | 42  | 33  |
| P62702 | 40S ribosomal protein S4, X isoform                                                                                                                                                    | Rps4x (Rps4)                                      | 402  | 304  | 30  | 23  |
| P62751 | 60S ribosomal protein L23a                                                                                                                                                             | Rpl23a                                            | 75   | 49   | 16  | 12  |
| P60710 | Actin, cytoplasmic 1 (Beta-actin)                                                                                                                                                      | Actb                                              | 5140 | 4496 | 282 | 208 |
| P62264 | 40S ribosomal protein S14                                                                                                                                                              | Rps14                                             | 163  | 166  | 15  | 11  |
| P25444 | 40S ribosomal protein S2 (S4) (LLRep3 protein)                                                                                                                                         | Rps2 (Llrep3) (Rps4)                              | 217  | 50   | 26  | 19  |
| P62991 | Ubiquitin                                                                                                                                                                              | Rps27a (Uba80) (Ubcep1); Uba52 (Ubcep2); Ubb; Ubc | 61   | 54   | 11  | 8   |
| Q9CR57 | 60S ribosomal protein L14                                                                                                                                                              | Rpl14                                             | 508  | 391  | 33  | 24  |
| P27659 | 60S ribosomal protein L3 (J1 protein)                                                                                                                                                  | Rpl3                                              | 192  | 75   | 25  | 18  |
| P14148 | 60S ribosomal protein L7                                                                                                                                                               | Rpl7                                              | 145  | 52   | 14  | 10  |
| P14869 | 60S acidic ribosomal protein P0 (L10E)                                                                                                                                                 | Rplp0 (Arbp)                                      | 115  | 334  | 28  | 20  |

|        |                                                                                                         |                                |      |      |     |     |
|--------|---------------------------------------------------------------------------------------------------------|--------------------------------|------|------|-----|-----|
| P08551 | Neurofilament light polypeptide (NF-L) (Neurofilament triplet L protein) (68 kDa neurofilament protein) | Nefl (Nf68) (Nfl)              | 51   | 36   | 17  | 12  |
| P51410 | 60S ribosomal protein L9                                                                                | Rpl9                           | 187  | 212  | 17  | 12  |
| Q9CWF2 | Tubulin beta-2B chain                                                                                   | Tubb2b                         | 1435 | 825  | 86  | 59  |
| P99024 | Tubulin beta-5 chain                                                                                    | Tubb5                          | 1377 | 976  | 88  | 60  |
| Q62168 | Keratin, type I cuticular Ha2 (Hair keratin, type I Ha2) (Keratin-32) (K32)                             | Krt32 (Hka2) (Krt1-2) (Krtha2) | 39   | 36   | 9   | 6   |
| P61164 | Alpha-centractin (Centractin) (Centrosome-associated actin homolog) (Actin-RPV) (ARP1)                  | Actr1a (Ctrn1)                 | 247  | 124  | 27  | 18  |
| P68033 | Actin, alpha cardiac muscle 1 (Alpha-cardiac actin)                                                     | Actc1 (Actc)                   | 3948 | 2726 | 234 | 155 |
| P68372 | Tubulin beta-2C chain                                                                                   | Tubb2c                         | 1300 | 891  | 78  | 51  |
| P61161 | Actin-related protein 2 (Actin-like protein 2)                                                          | Actr2 (Arp2)                   | 247  | 124  | 28  | 18  |
| Q9CXW4 | 60S ribosomal protein L11                                                                               | Rpl11                          | 72   | 79   | 11  | 7   |
| Q7TMM9 | Tubulin beta-2A chain                                                                                   | Tubb2a (Tubb2)                 | 1422 | 775  | 83  | 52  |
| P62717 | 60S ribosomal protein L18a                                                                              | Rpl18a                         | 242  | 62   | 21  | 13  |
| P84099 | 60S ribosomal protein L19                                                                               | Rpl19                          | 39   | 47   | 13  | 8   |
| P62301 | 40S ribosomal protein S13                                                                               | Rps13                          | 77   | 100  | 23  | 14  |
| Q9D1R9 | 60S ribosomal protein L34                                                                               | Rpl34                          | 34   | 32   | 10  | 6   |
| P26040 | Ezrin (p81) (Cytovillin) (Villin-2)                                                                     | Ezr (Vil2)                     | 127  | 106  | 27  | 16  |
| P62900 | 60S ribosomal protein L31                                                                               | Rpl31                          | 124  | 62   | 12  | 7   |
| P41105 | 60S ribosomal protein L28                                                                               | Rpl28                          | 49   | 41   | 19  | 11  |
| Q9CZX8 | 40S ribosomal protein S19                                                                               | Rps19                          | 206  | 146  | 19  | 11  |
| P47963 | 60S ribosomal protein L13 (A52)                                                                         | Rpl13                          | 744  | 379  | 47  | 27  |
| P26043 | Radixin (ESP10)                                                                                         | Rdx                            | 127  | 106  | 23  | 13  |
| P97461 | 40S ribosomal protein S5                                                                                | Rps5                           | 89   | 33   | 32  | 18  |
| Q9D6F9 | Tubulin beta-4 chain                                                                                    | Tubb4                          | 888  | 493  | 58  | 31  |
| Q922F4 | Tubulin beta-6 chain                                                                                    | Tubb6                          | 583  | 382  | 40  | 21  |
| P97351 | 40S ribosomal protein S3a                                                                               | Rps3a                          | 899  | 392  | 50  | 26  |
| Q9ERD7 | Tubulin beta-3 chain                                                                                    | Tubb3                          | 780  | 383  | 52  | 27  |

|                              |                                               |                                                                                                                                                                                         |                            |     |      |    |     |
|------------------------------|-----------------------------------------------|-----------------------------------------------------------------------------------------------------------------------------------------------------------------------------------------|----------------------------|-----|------|----|-----|
| cytoskeletal protein binding | Q8BTM8                                        | Filamin-A (Alpha-filamin) (Filamin-1) (Endothelial actin-binding protein) (Actin-binding protein 280) (ABP-280) (Non-muscle filamin)                                                    | Flna (Fln) (Fln1)          | 254 | 1031 | 46 | 86  |
|                              | P62962                                        | Profilin-1 (Profilin I)                                                                                                                                                                 | Pfn1                       | 30  | 93   | 4  | 7   |
|                              | P18760                                        | Cofilin-1 (Cofilin, non-muscle isoform)                                                                                                                                                 | Cfl1                       | 959 | 2552 | 70 | 122 |
|                              | P61982                                        | 14-3-3 protein gamma                                                                                                                                                                    | Ywhag                      | 653 | 841  | 53 | 79  |
|                              | Q8VHX6                                        | Filamin-C (Gamma-filamin) (Filamin-2) (FLN-C) (Actin-binding-like protein) (ABP-L) (ABP-280-like protein)                                                                               | FlnC (Abpl) (Fln2)         | 33  | 115  | 18 | 25  |
|                              | P68510                                        | 14-3-3 protein eta                                                                                                                                                                      | Ywhah                      | 707 | 962  | 58 | 80  |
|                              | Q8K298                                        | Actin-binding protein anillin                                                                                                                                                           | Anln                       | 16  | 28   | 17 | 23  |
|                              | Q61595                                        | Kinectin                                                                                                                                                                                | Ktn1                       | 15  | 50   | 43 | 56  |
|                              | P47753                                        | F-actin-capping protein subunit alpha-1 (CapZ alpha-1)                                                                                                                                  | Capza1 (Cappa1)            | 60  | 33   | 7  | 9   |
|                              | Q80X90                                        | Filamin-B (FLN-B) (Beta-filamin) (Actin-binding like protein) (ABP-280-like protein)                                                                                                    | Flnb                       | 63  | 279  | 32 | 41  |
|                              | P47754                                        | F-actin-capping protein subunit alpha-2 (CapZ alpha-2)                                                                                                                                  | Capza2 (Cappa2)            | 60  | 33   | 5  | 6   |
|                              | P54227                                        | Stathmin (Phosphoprotein p19) (pp19) (Leukemia-associated phosphoprotein p18) (Oncoprotein 18) (Op18) (pp17) (Prosolin) (Metablastin) (Protein Pr22) (Leukemia-associated gene protein) | Stmn1 (Lag) (Lap18) (Pr22) | 121 | 120  | 10 | 12  |
|                              | Q60575                                        | Kinesin-like protein KIF1B                                                                                                                                                              | Kif1b                      | 45  | 95   | 30 | 36  |
|                              | Q9WUM4                                        | Coronin-1C (Coronin-3)                                                                                                                                                                  | Coro1c                     | 42  | 28   | 18 | 21  |
|                              | P48754                                        | Breast cancer type 1 susceptibility protein homolog                                                                                                                                     | Brca1                      | 28  | 25   | 26 | 30  |
|                              | Q62418                                        | Drebrin-like protein (SH3 domain-containing protein 7) (Actin-binding protein 1)                                                                                                        | Dbnl (Abp1) (Sh3p7)        | 24  | 39   | 7  | 8   |
| P40124                       | Adenylyl cyclase-associated protein 1 (CAP 1) | Cap1 (Cap)                                                                                                                                                                              | 22                         | 43  | 8    | 9  |     |
| Q91X97                       | Neurocalcin-delta                             | Ncald (D15Ert412e)                                                                                                                                                                      | 85                         | 82  | 8    | 9  |     |

|        |                                                                                                                                                                                                                     |                                       |     |     |     |     |
|--------|---------------------------------------------------------------------------------------------------------------------------------------------------------------------------------------------------------------------|---------------------------------------|-----|-----|-----|-----|
| Q91ZT5 | FYVE, RhoGEF and PH domain-containing protein 4 (Actin filament-binding protein frabin) (FGD1-related F-actin-binding protein)                                                                                      | Fgd4                                  | 29  | 19  | 10  | 11  |
| P27546 | Microtubule-associated protein 4 (MAP-4)                                                                                                                                                                            | Map4 (Mtap4)                          | 94  | 41  | 33  | 36  |
| P16546 | Spectrin alpha chain, brain (Spectrin, non-erythroid alpha chain) (Alpha-II spectrin) (Fodrin alpha chain)                                                                                                          | Sptan1 (Spna2) (Spta2)                | 68  | 86  | 66  | 69  |
| P26039 | Talin-1                                                                                                                                                                                                             | Tln1 (Tln)                            | 123 | 161 | 41  | 42  |
| Q62261 | Spectrin beta chain, brain 1 (Spectrin, non-erythroid beta chain 1) (Beta-II spectrin) (Fodrin beta chain) (Embryonic liver fodrin)                                                                                 | Sptbn1 (Elf) (Spnb-2) (Spnb2) (Sptb2) | 56  | 54  | 48  | 48  |
| P45591 | Cofilin-2 (Cofilin, muscle isoform)                                                                                                                                                                                 | Cfl2                                  | 528 | 431 | 39  | 38  |
| O08638 | Myosin-11 (Myosin heavy chain 11) (Myosin heavy chain, smooth muscle isoform) (SMMHC)                                                                                                                               | Myh11                                 | 211 | 221 | 79  | 76  |
| Q61768 | Kinesin-1 heavy chain (Ubiquitous kinesin heavy chain) (UKHC) (Conventional kinesin heavy chain)                                                                                                                    | Kif5b (Khcs) (Kns1)                   | 102 | 303 | 43  | 41  |
| Q8CGC7 | Bifunctional aminoacyl-tRNA synthetase [Includes: Glutamyl-tRNA synthetase (EC 6.1.1.17) (Glutamate--tRNA ligase); Prolyl-tRNA synthetase (EC 6.1.1.15) (Proline--tRNA ligase)]                                     | Eprs (Qprs)                           | 130 | 102 | 32  | 29  |
| Q8VDD5 | Myosin-9 (Myosin heavy chain 9) (Myosin heavy chain, non-muscle IIa) (Non-muscle myosin heavy chain IIa) (NMMHC II-a) (NMMHC-IIA) (Cellular myosin heavy chain, type A) (Non-muscle myosin heavy chain-A) (NMMHC-A) | Myh9                                  | 780 | 839 | 127 | 115 |
| P26041 | Moesin (Membrane-organizing extension spike protein)                                                                                                                                                                | Msn                                   | 136 | 127 | 44  | 39  |
| Q99104 | Myosin-Va (Dilute myosin heavy chain, non-muscle)                                                                                                                                                                   | Myo5a (Dilute)                        | 28  | 34  | 35  | 31  |

|        |                                                                                                                                                                               |                                 |     |     |     |     |
|--------|-------------------------------------------------------------------------------------------------------------------------------------------------------------------------------|---------------------------------|-----|-----|-----|-----|
| Q9R0P5 | Destrin (Actin-depolymerizing factor) (ADF) (Sid 23)                                                                                                                          | Dstn (Dsn) (Sid23)              | 61  | 81  | 8   | 7   |
| Q8R4U0 | Stabilin-2 (Fasciclin, EGF-like, laminin-type EGF-like and link domain-containing scavenger receptor 2) (FEEL-2) [Cleaved into: Short form stabilin-2]                        | Stab2 (Feel2)                   | 25  | 43  | 12  | 10  |
| P20357 | Microtubule-associated protein 2 (MAP-2)                                                                                                                                      | Map2 (Mtap2)                    | 50  | 22  | 30  | 25  |
| P11531 | Dystrophin                                                                                                                                                                    | Dmd                             | 25  | 16  | 66  | 55  |
| Q6URW6 | Myosin-14 (Myosin heavy chain 14) (Myosin heavy chain, non-muscle IIc) (Non-muscle myosin heavy chain IIc) (NMHC II-C)                                                        | Myh14                           | 60  | 48  | 53  | 44  |
| Q91ZU6 | Bullous pemphigoid antigen 1, isoforms 1/2/3/4 (BPA) (Hemidesmosomal plaque protein) (Dystonia musculorum protein) (Dystonin)                                                 | Dst (Bpag1)                     | 78  | 38  | 126 | 100 |
| Q6A078 | Centrosomal protein of 290 kDa (Cep290) (Nephrocystin-6)                                                                                                                      | Cep290 (Kiaa0373) (Nphp6)       | 32  | 57  | 85  | 66  |
| Q7TMK6 | Protein Hook homolog 2                                                                                                                                                        | Hook2                           | 33  | 36  | 26  | 20  |
| P97434 | Myosin phosphatase Rho-interacting protein (Rho-interacting protein 3) (RIP3) (p116Rip)                                                                                       | Mrip (Kiaa0864) (Mrip) (Rhoip3) | 35  | 23  | 25  | 19  |
| P25233 | Necdin                                                                                                                                                                        | Ndn                             | 30  | 23  | 16  | 12  |
| Q8C9S8 | Cysteine protease ATG4A (EC 3.4.22.-) (Autophagy-related protein 4 homolog A) (Autophagin-2) (Autophagy-related cysteine endopeptidase 2) (AUT-like 2 cysteine endopeptidase) | Atg4a (Apg4a) (Autl2)           | 26  | 21  | 6   | 4   |
| Q8K4L3 | Supervillin (Archvillin) (p205/p250)                                                                                                                                          | Svil                            | 25  | 22  | 18  | 12  |
| P61161 | Actin-related protein 2 (Actin-like protein 2)                                                                                                                                | Actr2 (Arp2)                    | 247 | 124 | 28  | 18  |

|                 |        |                                                                                                                                                                                                                                                       |                       |     |     |    |    |
|-----------------|--------|-------------------------------------------------------------------------------------------------------------------------------------------------------------------------------------------------------------------------------------------------------|-----------------------|-----|-----|----|----|
|                 | Q61879 | Myosin-10 (Myosin heavy chain 10) (Myosin heavy chain, non-muscle IIb) (Non-muscle myosin heavy chain IIb) (NMMHC II-b) (NMMHC-IIB) (Cellular myosin heavy chain, type B) (Non-muscle myosin heavy chain-B) (NMMHC-B)                                 | Myh10                 | 122 | 101 | 65 | 40 |
|                 | Q9Z0P5 | Twinfilin-2 (Twinfilin-1-like protein) (A6-related protein) (mA6RP)                                                                                                                                                                                   | Twf2 (Ptk9l)          | 29  | 32  | 10 | 6  |
|                 | P26040 | Ezrin (p81) (Cytovillin) (Villin-2)                                                                                                                                                                                                                   | Ezr (Vil2)            | 127 | 106 | 27 | 16 |
|                 | P47757 | F-actin-capping protein subunit beta (CapZ beta)                                                                                                                                                                                                      | Capzb (Cappb1)        | 107 | 68  | 7  | 4  |
|                 | P26043 | Radixin (ESP10)                                                                                                                                                                                                                                       | Rdx                   | 127 | 106 | 23 | 13 |
| ATPase activity | P97311 | DNA replication licensing factor MCM6 (Mis5 homolog)                                                                                                                                                                                                  | Mcm6 (Mcmd6) (Mis5)   | 110 | 395 | 20 | 38 |
|                 | Q9Z129 | ATP-dependent DNA helicase Q1 (EC 3.6.1.-) (DNA-dependent ATPase Q1)                                                                                                                                                                                  | Recql (Recql1)        | 17  | 27  | 13 | 22 |
|                 | Q501J6 | Probable ATP-dependent RNA helicase DDX17 (EC 3.6.1.-) (DEAD box protein 17)                                                                                                                                                                          | Ddx17                 | 90  | 43  | 7  | 11 |
|                 | P27641 | ATP-dependent DNA helicase 2 subunit 2 (EC 3.6.1.-) (ATP-dependent DNA helicase II 80 kDa subunit) (Ku autoantigen protein p86 homolog) (Ku80) (CTC box-binding factor 85 kDa subunit) (CTCBF) (CTC85) (Nuclear factor IV) (DNA repair protein XRCC5) | Xrcc5 (G22p2)         | 22  | 29  | 16 | 22 |
|                 | Q5SXJ3 | Fanconi anemia group J protein homolog (Protein FACJ) (EC 3.6.1.-) (ATP-dependent RNA helicase BRIP1) (BRCA1-interacting protein C-terminal helicase 1) (BRCA1-interacting protein 1) (BRCA1-associated C-terminal helicase 1)                        | Brip1 (Bach1) (Fancj) | 25  | 18  | 13 | 17 |
|                 | Q61496 | Probable ATP-dependent RNA helicase DDX4 (EC 3.6.1.-) (DEAD box protein 4) (Vasa homolog) (Mvh)                                                                                                                                                       | Ddx4 (Vasa)           | 17  | 25  | 44 | 56 |

|        |                                                                                                                                                                                                                                    |                         |     |     |     |     |
|--------|------------------------------------------------------------------------------------------------------------------------------------------------------------------------------------------------------------------------------------|-------------------------|-----|-----|-----|-----|
| Q60848 | Lymphocyte-specific helicase (EC 3.6.1.-)<br>(Proliferation associated SNF2-like protein)                                                                                                                                          | Hells (Lsh)<br>(Pasg)   | 37  | 35  | 10  | 12  |
| Q60575 | Kinesin-like protein KIF1B                                                                                                                                                                                                         | Kif1b                   | 45  | 95  | 30  | 36  |
| Q9R0K7 | Plasma membrane calcium-transporting<br>ATPase 2 (PMCA2) (EC 3.6.3.8) (Plasma<br>membrane calcium ATPase isoform 2)<br>(Plasma membrane calcium pump isoform 2)                                                                    | Atp2b2<br>(Pmca2)       | 32  | 27  | 70  | 83  |
| P49718 | DNA replication licensing factor MCM5<br>(CDC46 homolog) (P1-CDC46)                                                                                                                                                                | Mcm5 (Cdc46)<br>(Mcmd5) | 40  | 20  | 18  | 21  |
| P49717 | DNA replication licensing factor MCM4<br>(CDC21 homolog) (P1-CDC21)                                                                                                                                                                | Mcm4 (Cdc21)<br>(Mcmd4) | 29  | 18  | 11  | 12  |
| P25206 | DNA replication licensing factor MCM3 (DNA<br>polymerase alpha holoenzyme-associated<br>protein P1) (P1-MCM3)                                                                                                                      | Mcm3 (Mcmd)<br>(Mcmd3)  | 74  | 185 | 15  | 15  |
| Q01853 | Transitional endoplasmic reticulum ATPase<br>(TER ATPase) (15S Mg(2+)-ATPase p97<br>subunit) (Valosin-containing protein) (VCP)                                                                                                    | Vcp                     | 691 | 699 | 56  | 51  |
| Q8VDD5 | Myosin-9 (Myosin heavy chain 9) (Myosin<br>heavy chain, non-muscle IIa) (Non-muscle<br>myosin heavy chain IIa) (NMMHC II-a)<br>(NMMHC-IIA) (Cellular myosin heavy chain,<br>type A) (Non-muscle myosin heavy chain-A)<br>(NMMHC-A) | Myh9                    | 780 | 839 | 127 | 115 |
| Q8VHE6 | Dynein heavy chain 5, axonemal (Axonemal<br>beta dynein heavy chain 5) (Mdnah5) (Ciliary<br>dynein heavy chain 5)                                                                                                                  | Dnah5<br>(Dnahc5)       | 47  | 44  | 83  | 72  |
| Q91XQ0 | Dynein heavy chain 8, axonemal (Axonemal<br>beta dynein heavy chain 8) (Ciliary dynein<br>heavy chain 8)                                                                                                                           | Dnahc8                  | 47  | 51  | 77  | 64  |
| Q6URW6 | Myosin-14 (Myosin heavy chain 14) (Myosin<br>heavy chain, non-muscle IIc) (Non-muscle<br>myosin heavy chain IIc) (NMHC II-C)                                                                                                       | Myh14                   | 60  | 48  | 53  | 44  |

|        |                                                                                                                                                                                                                                                                |                                        |     |     |     |     |
|--------|----------------------------------------------------------------------------------------------------------------------------------------------------------------------------------------------------------------------------------------------------------------|----------------------------------------|-----|-----|-----|-----|
| Q8R429 | Sarcoplasmic/endoplasmic reticulum calcium ATPase 1 (SERCA1) (EC 3.6.3.8) (Calcium pump 1) (Calcium-transporting ATPase sarcoplasmic reticulum type, fast twitch skeletal muscle isoform) (SR Ca(2+)-ATPase 1) (Endoplasmic reticulum class 1/2 Ca(2+) ATPase) | Atp2a1                                 | 25  | 17  | 17  | 14  |
| Q569Z5 | Probable ATP-dependent RNA helicase DDX46 (EC 3.6.1.-) (DEAD box protein 46)                                                                                                                                                                                   | Ddx46 (Kiaa0801)                       | 25  | 17  | 21  | 17  |
| Q8VI47 | Canalicular multispecific organic anion transporter 1 (ATP-binding cassette sub-family C member 2)                                                                                                                                                             | Abcc2                                  | 31  | 38  | 39  | 31  |
| Q9JHU4 | Cytoplasmic dynein 1 heavy chain 1 (Cytoplasmic dynein heavy chain 1) (Dynein heavy chain, cytosolic)                                                                                                                                                          | Dync1h1 (Dhc1) (Dnch1) (Dnchc1) (Dyhc) | 822 | 395 | 157 | 123 |
| O70228 | Probable phospholipid-transporting ATPase IIA (EC 3.6.3.1) (ATPase class II type 9A)                                                                                                                                                                           | Atp9a                                  | 31  | 29  | 37  | 28  |
| P56480 | ATP synthase subunit beta, mitochondrial (EC 3.6.3.14)                                                                                                                                                                                                         | Atp5b                                  | 31  | 50  | 8   | 6   |
| Q61656 | Probable ATP-dependent RNA helicase DDX5 (EC 3.6.1.-) (DEAD box protein 5) (RNA helicase p68) (DEAD box RNA helicase DEAD1) (mDEAD1)                                                                                                                           | Ddx5 (Tnz2)                            | 90  | 43  | 11  | 8   |
| Q8CG48 | Structural maintenance of chromosomes protein 2 (Chromosome-associated protein E) (XCAP-E homolog) (FGF-inducible protein 16)                                                                                                                                  | Smc2 (Cape) (Fin16) (Smc2l1)           | 32  | 36  | 41  | 26  |



|                          |        |                                                                                                                                                                                                                                                                                                        |                       |      |      |     |    |
|--------------------------|--------|--------------------------------------------------------------------------------------------------------------------------------------------------------------------------------------------------------------------------------------------------------------------------------------------------------|-----------------------|------|------|-----|----|
|                          | Q61983 | Sodium-dependent phosphate transport protein 1 (Sodium/phosphate cotransporter 1) (Na(+)/PI cotransporter 1) (Solute carrier family 17 member 1) (Renal sodium-dependent phosphate transport protein 1) (Renal sodium-phosphate transport protein 1) (Renal Na(+)-dependent phosphate cotransporter 1) | Slc17a1 (Npt1)        | 31   | 33   | 8   | 5  |
|                          | Q61879 | Myosin-10 (Myosin heavy chain 10) (Myosin heavy chain, non-muscle IIb) (Non-muscle myosin heavy chain IIb) (NMMHC II-b) (NMMHC-IIB) (Cellular myosin heavy chain, type B) (Non-muscle myosin heavy chain-B) (NMMHC-B)                                                                                  | Myh10                 | 122  | 101  | 65  | 40 |
|                          | P10630 | Eukaryotic initiation factor 4A-II (eIF-4A-II) (eIF4A-II) (EC 3.6.1.-) (ATP-dependent RNA helicase eIF4A-2)                                                                                                                                                                                            | Eif4a2 (Ddx2b)        | 194  | 78   | 17  | 10 |
|                          | P63017 | Heat shock cognate 71 kDa protein (Heat shock 70 kDa protein 8)                                                                                                                                                                                                                                        | Hspa8 (Hsc70) (Hsc73) | 1719 | 959  | 119 | 70 |
|                          | Q8K219 | F-box only protein 18 (EC 3.6.1.-) (F-box DNA helicase 1)                                                                                                                                                                                                                                              | Fbxo18 (Fbh1) (Fbx18) | 30   | 23   | 9   | 5  |
| unfolded protein binding | P17742 | Peptidyl-prolyl cis-trans isomerase A (PPIase A) (Rotamase A) (EC 5.2.1.8) (Cyclophilin A) (Cyclosporin A-binding protein) (SP18)                                                                                                                                                                      | Ppia                  | 855  | 1549 | 38  | 66 |
|                          | Q61937 | Nucleophosmin (NPM) (Nucleolar phosphoprotein B23) (Numatrin) (Nucleolar protein NO38)                                                                                                                                                                                                                 | Npm1                  | 92   | 66   | 11  | 15 |
|                          | P80315 | T-complex protein 1 subunit delta (TCP-1-delta) (CCT-delta) (A45)                                                                                                                                                                                                                                      | Cct4 (Cctd)           | 61   | 59   | 15  | 18 |
|                          | P80313 | T-complex protein 1 subunit eta (TCP-1-eta) (CCT-eta)                                                                                                                                                                                                                                                  | Cct7 (Ccth)           | 49   | 50   | 11  | 13 |

|        |                                                                                                                                                                                                             |                                    |      |      |     |     |
|--------|-------------------------------------------------------------------------------------------------------------------------------------------------------------------------------------------------------------|------------------------------------|------|------|-----|-----|
| Q9R0Q7 | Prostaglandin E synthase 3 (EC 5.3.99.3) (Cytosolic prostaglandin E2 synthase) (cPGES) (Telomerase-binding protein p23) (Hsp90 co-chaperone) (Progesterone receptor complex p23) (Sid 3177)                 | Ptges3 (Sid3177) (Tebp)            | 124  | 239  | 10  | 11  |
| P07901 | Heat shock protein HSP 90-alpha (HSP 86) (Tumor-specific transplantation 86 kDa antigen) (TSTA)                                                                                                             | Hsp90aa1 (Hsp86) (Hsp86-1) (Hspca) | 1529 | 2324 | 134 | 146 |
| P38647 | Stress-70 protein, mitochondrial (75 kDa glucose-regulated protein) (GRP 75) (Heat shock 70 kDa protein 9) (Peptide-binding protein 74) (PBP74) (P66 MOT) (Mortalin)                                        | Hspa9 (Grp75) (Hsp74) (Hspa9a)     | 33   | 33   | 12  | 13  |
| P08113 | Endoplasmic reticulum chaperone protein (Heat shock protein 90 kDa beta member 1) (94 kDa glucose-regulated protein) (GRP94) (ERP99) (Polymorphic tumor rejection antigen 1) (Tumor rejection antigen gp96) | Hsp90b1 (Tra-1) (Tra1)             | 221  | 298  | 25  | 27  |
| P11984 | T-complex protein 1 subunit alpha A (TCP-1-alpha) (CCT-alpha) (Tailless complex polypeptide 1A) (TCP-1-A)                                                                                                   | Cct1 (Ccta) (Tcp1)                 | 29   | 66   | 14  | 15  |
| P11499 | Heat shock protein HSP 90-beta (HSP 84) (Tumor-specific transplantation 84 kDa antigen) (TSTA)                                                                                                              | Hsp90ab1 (Hsp84) (Hsp84-1) (Hspcb) | 2943 | 3523 | 208 | 205 |
| Q9CQN1 | Heat shock protein 75 kDa, mitochondrial (HSP 75) (Tumor necrosis factor type 1 receptor-associated protein) (TRAP-1) (TNFR-associated protein 1)                                                           | Trap1 (Hsp75)                      | 197  | 335  | 13  | 11  |
| P11983 | T-complex protein 1 subunit alpha B (TCP-1-alpha) (CCT-alpha) (Tailless complex polypeptide 1B) (TCP-1-B)                                                                                                   | Cct1 (Ccta) (Tcp1)                 | 29   | 66   | 18  | 15  |
| P80316 | T-complex protein 1 subunit epsilon (TCP-1-epsilon) (CCT-epsilon)                                                                                                                                           | Cct5 (Ccte) (Kiaa0098)             | 239  | 102  | 17  | 14  |
| P42932 | T-complex protein 1 subunit theta (TCP-1-theta) (CCT-theta)                                                                                                                                                 | Cct8 (Cctq)                        | 197  | 57   | 23  | 15  |

|                                               |        |                                                                                                                                                                          |                                |      |      |     |    |
|-----------------------------------------------|--------|--------------------------------------------------------------------------------------------------------------------------------------------------------------------------|--------------------------------|------|------|-----|----|
|                                               | P63038 | 60 kDa heat shock protein, mitochondrial (Heat shock protein 60) (HSP-60) (Hsp60) (60 kDa chaperonin) (Chaperonin 60) (CPN60) (Mitochondrial matrix protein P1) (HSP-65) | Hspd1 (Hsp60)                  | 15   | 32   | 22  | 13 |
|                                               | P80317 | T-complex protein 1 subunit zeta (TCP-1-zeta) (CCT-zeta) (CCT-zeta-1)                                                                                                    | Cct6a (Cct6) (Cctz) (Cctz1)    | 160  | 52   | 22  | 13 |
|                                               | P63017 | Heat shock cognate 71 kDa protein (Heat shock 70 kDa protein 8)                                                                                                          | Hspa8 (Hsc70) (Hsc73)          | 1719 | 959  | 119 | 70 |
|                                               | Q61390 | T-complex protein 1 subunit zeta-2 (TCP-1-zeta-2) (CCT-zeta-2) (Cctz-2)                                                                                                  | Cct6b                          | 55   | 52   | 15  | 8  |
| hydrolase activity, acting on acid anhydrides | Q3TCT4 | Ectonucleoside triphosphate diphosphohydrolase 7 (NTPDase 7) (EC 3.6.1.-) (Lysosomal apyrase-like protein 1)                                                             | Entpd7 (Kiaa4066) (Lalp1)      | 16   | 33   | 42  | 80 |
|                                               | P97311 | DNA replication licensing factor MCM6 (Mis5 homolog)                                                                                                                     | Mcm6 (Mcmd6) (Mis5)            | 110  | 395  | 20  | 38 |
|                                               | Q9Z1R2 | Large proline-rich protein BAT3 (HLA-B-associated transcript 3)                                                                                                          | Bat3                           | 80   | 49   | 15  | 26 |
|                                               | Q9Z129 | ATP-dependent DNA helicase Q1 (EC 3.6.1.-) (DNA-dependent ATPase Q1)                                                                                                     | Recql (Recql1)                 | 17   | 27   | 13  | 22 |
|                                               | Q501J6 | Probable ATP-dependent RNA helicase DDX17 (EC 3.6.1.-) (DEAD box protein 17)                                                                                             | Ddx17                          | 90   | 43   | 7   | 11 |
|                                               | P63001 | Ras-related C3 botulinum toxin substrate 1 (p21-Rac1)                                                                                                                    | Rac1                           | 31   | 99   | 7   | 11 |
|                                               | Q9WVP9 | Interferon-induced GTP-binding protein Mx2 (Myxovirus resistance protein 2)                                                                                              | Mx2                            | 32   | 22   | 14  | 20 |
|                                               | P05214 | Tubulin alpha-3 chain (Tubulin alpha-3/alpha-7 chain) (Alpha-tubulin 3/7) (Alpha-tubulin isotype M-alpha-3/7)                                                            | Tuba3a (Tuba3); Tuba3b (Tuba7) | 1112 | 1288 | 61  | 84 |

|        |                                                                                                                                                                                                                                                       |                       |     |     |     |     |
|--------|-------------------------------------------------------------------------------------------------------------------------------------------------------------------------------------------------------------------------------------------------------|-----------------------|-----|-----|-----|-----|
| P27641 | ATP-dependent DNA helicase 2 subunit 2 (EC 3.6.1.-) (ATP-dependent DNA helicase II 80 kDa subunit) (Ku autoantigen protein p86 homolog) (Ku80) (CTC box-binding factor 85 kDa subunit) (CTCBF) (CTC85) (Nuclear factor IV) (DNA repair protein XRCC5) | Xrcc5 (G22p2)         | 22  | 29  | 16  | 22  |
| Q5SXJ3 | Fanconi anemia group J protein homolog (Protein FACJ) (EC 3.6.1.-) (ATP-dependent RNA helicase BRIP1) (BRCA1-interacting protein C-terminal helicase 1) (BRCA1-interacting protein 1) (BRCA1-associated C-terminal helicase 1)                        | Brip1 (Bach1) (Fancj) | 25  | 18  | 13  | 17  |
| P63321 | Ras-related protein Ral-A                                                                                                                                                                                                                             | Rala (Ral) (Rala)     | 25  | 22  | 30  | 39  |
| Q61496 | Probable ATP-dependent RNA helicase DDX4 (EC 3.6.1.-) (DEAD box protein 4) (Vasa homolog) (Mvh)                                                                                                                                                       | Ddx4 (Vasa)           | 17  | 25  | 44  | 56  |
| Q60848 | Lymphocyte-specific helicase (EC 3.6.1.-) (Proliferation associated SNF2-like protein)                                                                                                                                                                | Hells (Lsh) (Pasg)    | 37  | 35  | 10  | 12  |
| Q60575 | Kinesin-like protein KIF1B                                                                                                                                                                                                                            | Kif1b                 | 45  | 95  | 30  | 36  |
| O08810 | 116 kDa U5 small nuclear ribonucleoprotein component (U5 snRNP-specific protein, 116 kDa) (U5-116 kDa) (Elongation factor Tu GTP-binding domain-containing protein 2)                                                                                 | Eftud2 (Snrp116)      | 80  | 68  | 21  | 25  |
| Q9R0K7 | Plasma membrane calcium-transporting ATPase 2 (PMCA2) (EC 3.6.3.8) (Plasma membrane calcium ATPase isoform 2) (Plasma membrane calcium pump isoform 2)                                                                                                | Atp2b2 (Pmca2)        | 32  | 27  | 70  | 83  |
| Q8C3X4 | GTP-binding protein GUF1 homolog                                                                                                                                                                                                                      | Guf1                  | 311 | 506 | 412 | 483 |
| P49718 | DNA replication licensing factor MCM5 (CDC46 homolog) (P1-CDC46)                                                                                                                                                                                      | Mcm5 (Cdc46) (Mcmd5)  | 40  | 20  | 18  | 21  |

|        |                                                                                                                                                                                                                     |                        |      |      |     |     |
|--------|---------------------------------------------------------------------------------------------------------------------------------------------------------------------------------------------------------------------|------------------------|------|------|-----|-----|
| P62631 | Elongation factor 1-alpha 2 (EF-1-alpha-2) (Elongation factor 1 A-2) (eEF1A-2) (Statin S1)                                                                                                                          | Eef1a2 (Eef1a1) (Strn) | 1275 | 1549 | 258 | 285 |
| P49717 | DNA replication licensing factor MCM4 (CDC21 homolog) (P1-CDC21)                                                                                                                                                    | Mcm4 (Cdc21) (Mcmd4)   | 29   | 18   | 11  | 12  |
| Q9QUI0 | Transforming protein RhoA                                                                                                                                                                                           | Rhoa (Arha) (Arha2)    | 117  | 231  | 11  | 12  |
| P10126 | Elongation factor 1-alpha 1 (EF-1-alpha-1) (Elongation factor 1 A-1) (eEF1A-1) (Elongation factor Tu) (EF-Tu)                                                                                                       | Eef1a1 (Eef1a)         | 2004 | 2344 | 305 | 330 |
| Q61820 | GTP-binding nuclear protein Ran, testis-specific isoform                                                                                                                                                            | Rasl2-9                | 564  | 570  | 23  | 24  |
| P25206 | DNA replication licensing factor MCM3 (DNA polymerase alpha holoenzyme-associated protein P1) (P1-MCM3)                                                                                                             | Mcm3 (Mcmd) (Mcmd3)    | 74   | 185  | 15  | 15  |
| P58252 | Elongation factor 2 (EF-2)                                                                                                                                                                                          | Eef2                   | 1630 | 1718 | 128 | 126 |
| P62827 | GTP-binding nuclear protein Ran (GTPase Ran) (Ras-related nuclear protein) (Ras-like protein TC4)                                                                                                                   | Ran (Rasl2-8)          | 756  | 656  | 38  | 36  |
| Q01853 | Transitional endoplasmic reticulum ATPase (TER ATPase) (15S Mg(2+)-ATPase p97 subunit) (Valosin-containing protein) (VCP)                                                                                           | Vcp                    | 691  | 699  | 56  | 51  |
| Q8VDD5 | Myosin-9 (Myosin heavy chain 9) (Myosin heavy chain, non-muscle IIa) (Non-muscle myosin heavy chain IIa) (NMMHC II-a) (NMMHC-IIA) (Cellular myosin heavy chain, type A) (Non-muscle myosin heavy chain-A) (NMMHC-A) | Myh9                   | 780  | 839  | 127 | 115 |
| Q8VHE6 | Dynein heavy chain 5, axonemal (Axonemal beta dynein heavy chain 5) (Mdnah5) (Ciliary dynein heavy chain 5)                                                                                                         | Dnah5 (Dnahc5)         | 47   | 44   | 83  | 72  |
| Q91XQ0 | Dynein heavy chain 8, axonemal (Axonemal beta dynein heavy chain 8) (Ciliary dynein heavy chain 8)                                                                                                                  | Dnahc8                 | 47   | 51   | 77  | 64  |

|        |                                                                                                                                                                                                                                                                |                                        |     |     |     |     |
|--------|----------------------------------------------------------------------------------------------------------------------------------------------------------------------------------------------------------------------------------------------------------------|----------------------------------------|-----|-----|-----|-----|
| Q6URW6 | Myosin-14 (Myosin heavy chain 14) (Myosin heavy chain, non-muscle IIc) (Non-muscle myosin heavy chain IIc) (NMHC II-C)                                                                                                                                         | Myh14                                  | 60  | 48  | 53  | 44  |
| Q8R429 | Sarcoplasmic/endoplasmic reticulum calcium ATPase 1 (SERCA1) (EC 3.6.3.8) (Calcium pump 1) (Calcium-transporting ATPase sarcoplasmic reticulum type, fast twitch skeletal muscle isoform) (SR Ca(2+)-ATPase 1) (Endoplasmic reticulum class 1/2 Ca(2+) ATPase) | Atp2a1                                 | 25  | 17  | 17  | 14  |
| Q569Z5 | Probable ATP-dependent RNA helicase DDX46 (EC 3.6.1.-) (DEAD box protein 46)                                                                                                                                                                                   | Ddx46 (Kiaa0801)                       | 25  | 17  | 21  | 17  |
| Q8VI47 | Canalicular multispecific organic anion transporter 1 (ATP-binding cassette sub-family C member 2)                                                                                                                                                             | Abcc2                                  | 31  | 38  | 39  | 31  |
| Q9JHU4 | Cytoplasmic dynein 1 heavy chain 1 (Cytoplasmic dynein heavy chain 1) (Dynein heavy chain, cytosolic)                                                                                                                                                          | Dync1h1 (Dhc1) (Dnch1) (Dnchc1) (Dyhc) | 822 | 395 | 157 | 123 |
| Q8CGK3 | Lon protease homolog, mitochondrial (EC 3.4.21.-) (Lon protease-like protein) (LONP) (Mitochondrial ATP-dependent protease Lon) (Serine protease 15)                                                                                                           | Lonp1 (Prss15)                         | 21  | 30  | 43  | 33  |
| Q8JZQ2 | AFG3-like protein 2 (EC 3.4.24.-)                                                                                                                                                                                                                              | Afg3l2                                 | 15  | 27  | 17  | 13  |
| O70228 | Probable phospholipid-transporting ATPase IIA (EC 3.6.3.1) (ATPase class II type 9A)                                                                                                                                                                           | Atp9a                                  | 31  | 29  | 37  | 28  |
| P56480 | ATP synthase subunit beta, mitochondrial (EC 3.6.3.14)                                                                                                                                                                                                         | Atp5b                                  | 31  | 50  | 8   | 6   |
| Q61656 | Probable ATP-dependent RNA helicase DDX5 (EC 3.6.1.-) (DEAD box protein 5) (RNA helicase p68) (DEAD box RNA helicase DEAD1) (mDEAD1)                                                                                                                           | Ddx5 (Tnz2)                            | 90  | 43  | 11  | 8   |

|        |                                                                                                                                                                                                                                                                                                        |                              |      |     |    |    |
|--------|--------------------------------------------------------------------------------------------------------------------------------------------------------------------------------------------------------------------------------------------------------------------------------------------------------|------------------------------|------|-----|----|----|
| P61294 | Ras-related protein Rab-6B                                                                                                                                                                                                                                                                             | Rab6b<br>(D9Bwg0185e)        | 18   | 53  | 10 | 7  |
| Q91YJ5 | Translation initiation factor IF-2, mitochondrial (IF-2Mt) (IF2(mt)) (IF-2(Mt))                                                                                                                                                                                                                        | Mtif2                        | 29   | 23  | 13 | 9  |
| Q9CWF2 | Tubulin beta-2B chain                                                                                                                                                                                                                                                                                  | Tubb2b                       | 1435 | 825 | 86 | 59 |
| P68040 | Guanine nucleotide-binding protein subunit beta-2-like 1 (Receptor of activated protein kinase C 1) (RACK1) (Receptor for activated C kinase) (p205) (12-3)                                                                                                                                            | Gnb2l1 (Gnb2-rs1)            | 541  | 153 | 35 | 24 |
| P99024 | Tubulin beta-5 chain                                                                                                                                                                                                                                                                                   | Tubb5                        | 1377 | 976 | 88 | 60 |
| P68372 | Tubulin beta-2C chain                                                                                                                                                                                                                                                                                  | Tubb2c                       | 1300 | 891 | 78 | 51 |
| Q8CG48 | Structural maintenance of chromosomes protein 2 (Chromosome-associated protein E) (XCAP-E homolog) (FGF-inducible protein 16)                                                                                                                                                                          | Smc2 (Cape) (Fin16) (Smc2l1) | 32   | 36  | 41 | 26 |
| Q7TMM9 | Tubulin beta-2A chain                                                                                                                                                                                                                                                                                  | Tubb2a (Tubb2)               | 1422 | 775 | 83 | 52 |
| Q61983 | Sodium-dependent phosphate transport protein 1 (Sodium/phosphate cotransporter 1) (Na(+)/PI cotransporter 1) (Solute carrier family 17 member 1) (Renal sodium-dependent phosphate transport protein 1) (Renal sodium-phosphate transport protein 1) (Renal Na(+)-dependent phosphate cotransporter 1) | Slc17a1 (Npt1)               | 31   | 33  | 8  | 5  |
| Q8C7H1 | Methylmalonic aciduria type A homolog, mitochondrial                                                                                                                                                                                                                                                   | Mmaa                         | 31   | 37  | 16 | 10 |
| Q61879 | Myosin-10 (Myosin heavy chain 10) (Myosin heavy chain, non-muscle IIb) (Non-muscle myosin heavy chain IIb) (NMMHC II-b) (NMMHC-IIb) (Cellular myosin heavy chain, type B) (Non-muscle myosin heavy chain-B) (NMMHC-B)                                                                                  | Myh10                        | 122  | 101 | 65 | 40 |

|                                    |        |                                                                                                               |                                |      |      |     |    |
|------------------------------------|--------|---------------------------------------------------------------------------------------------------------------|--------------------------------|------|------|-----|----|
|                                    | Q9QWK5 | Baculoviral IAP repeat-containing protein 1a (Neuronal apoptosis inhibitory protein 1)                        | Naip1 (Birc1a) (Naip)          | 21   | 28   | 20  | 12 |
|                                    | P10630 | Eukaryotic initiation factor 4A-II (eIF-4A-II) (eIF4A-II) (EC 3.6.1.-) (ATP-dependent RNA helicase eIF4A-2)   | Eif4a2 (Ddx2b)                 | 194  | 78   | 17  | 10 |
|                                    | P63017 | Heat shock cognate 71 kDa protein (Heat shock 70 kDa protein 8)                                               | Hspa8 (Hsc70) (Hsc73)          | 1719 | 959  | 119 | 70 |
|                                    | Q9QUK4 | Baculoviral IAP repeat-containing protein 1b (Neuronal apoptosis inhibitory protein 2)                        | Naip2 (Birc1b) (Naip-rs6)      | 21   | 28   | 14  | 8  |
|                                    | Q8K2I9 | F-box only protein 18 (EC 3.6.1.-) (F-box DNA helicase 1)                                                     | Fbxo18 (Fbh1) (Fbx18)          | 30   | 23   | 9   | 5  |
|                                    | Q9D6F9 | Tubulin beta-4 chain                                                                                          | Tubb4                          | 888  | 493  | 58  | 31 |
|                                    | Q922F4 | Tubulin beta-6 chain                                                                                          | Tubb6                          | 583  | 382  | 40  | 21 |
|                                    | Q9ERD7 | Tubulin beta-3 chain                                                                                          | Tubb3                          | 780  | 383  | 52  | 27 |
| nucleoside-triphosphatase activity | Q3TCT4 | Ectonucleoside triphosphate diphosphohydrolase 7 (NTPDase 7) (EC 3.6.1.-) (Lysosomal apyrase-like protein 1)  | Entpd7 (Kiaa4066) (Lalp1)      | 16   | 33   | 42  | 80 |
|                                    | P97311 | DNA replication licensing factor MCM6 (Mis5 homolog)                                                          | Mcm6 (Mcmd6) (Mis5)            | 110  | 395  | 20  | 38 |
|                                    | Q9Z129 | ATP-dependent DNA helicase Q1 (EC 3.6.1.-) (DNA-dependent ATPase Q1)                                          | Recql (Recql1)                 | 17   | 27   | 13  | 22 |
|                                    | Q501J6 | Probable ATP-dependent RNA helicase DDX17 (EC 3.6.1.-) (DEAD box protein 17)                                  | Ddx17                          | 90   | 43   | 7   | 11 |
|                                    | P63001 | Ras-related C3 botulinum toxin substrate 1 (p21-Rac1)                                                         | Rac1                           | 31   | 99   | 7   | 11 |
|                                    | Q9WVP9 | Interferon-induced GTP-binding protein Mx2 (Myxovirus resistance protein 2)                                   | Mx2                            | 32   | 22   | 14  | 20 |
|                                    | P05214 | Tubulin alpha-3 chain (Tubulin alpha-3/alpha-7 chain) (Alpha-tubulin 3/7) (Alpha-tubulin isotype M-alpha-3/7) | Tuba3a (Tuba3); Tuba3b (Tuba7) | 1112 | 1288 | 61  | 84 |



|        |                                                                                                                                                                                                                                                       |                       |     |     |     |     |
|--------|-------------------------------------------------------------------------------------------------------------------------------------------------------------------------------------------------------------------------------------------------------|-----------------------|-----|-----|-----|-----|
| P27641 | ATP-dependent DNA helicase 2 subunit 2 (EC 3.6.1.-) (ATP-dependent DNA helicase II 80 kDa subunit) (Ku autoantigen protein p86 homolog) (Ku80) (CTC box-binding factor 85 kDa subunit) (CTCBF) (CTC85) (Nuclear factor IV) (DNA repair protein XRCC5) | Xrcc5 (G22p2)         | 22  | 29  | 16  | 22  |
| Q5SXJ3 | Fanconi anemia group J protein homolog (Protein FACJ) (EC 3.6.1.-) (ATP-dependent RNA helicase BRIP1) (BRCA1-interacting protein C-terminal helicase 1) (BRCA1-interacting protein 1) (BRCA1-associated C-terminal helicase 1)                        | Brip1 (Bach1) (Fancj) | 25  | 18  | 13  | 17  |
| P63321 | Ras-related protein Ral-A                                                                                                                                                                                                                             | Rala (Ral) (Rala)     | 25  | 22  | 30  | 39  |
| Q61496 | Probable ATP-dependent RNA helicase DDX4 (EC 3.6.1.-) (DEAD box protein 4) (Vasa homolog) (Mvh)                                                                                                                                                       | Ddx4 (Vasa)           | 17  | 25  | 44  | 56  |
| Q60848 | Lymphocyte-specific helicase (EC 3.6.1.-) (Proliferation associated SNF2-like protein)                                                                                                                                                                | Hells (Lsh) (Pasg)    | 37  | 35  | 10  | 12  |
| Q60575 | Kinesin-like protein KIF1B                                                                                                                                                                                                                            | Kif1b                 | 45  | 95  | 30  | 36  |
| O08810 | 116 kDa U5 small nuclear ribonucleoprotein component (U5 snRNP-specific protein, 116 kDa) (U5-116 kDa) (Elongation factor Tu GTP-binding domain-containing protein 2)                                                                                 | Eftud2 (Snrp116)      | 80  | 68  | 21  | 25  |
| Q9R0K7 | Plasma membrane calcium-transporting ATPase 2 (PMCA2) (EC 3.6.3.8) (Plasma membrane calcium ATPase isoform 2) (Plasma membrane calcium pump isoform 2)                                                                                                | Atp2b2 (Pmca2)        | 32  | 27  | 70  | 83  |
| Q8C3X4 | GTP-binding protein GUF1 homolog                                                                                                                                                                                                                      | Guf1                  | 311 | 506 | 412 | 483 |
| P49718 | DNA replication licensing factor MCM5 (CDC46 homolog) (P1-CDC46)                                                                                                                                                                                      | Mcm5 (Cdc46) (Mcmd5)  | 40  | 20  | 18  | 21  |

|        |                                                                                                                                                                                                                     |                        |      |      |     |     |
|--------|---------------------------------------------------------------------------------------------------------------------------------------------------------------------------------------------------------------------|------------------------|------|------|-----|-----|
| P62631 | Elongation factor 1-alpha 2 (EF-1-alpha-2) (Elongation factor 1 A-2) (eEF1A-2) (Statin S1)                                                                                                                          | Eef1a2 (Eef1a1) (Strn) | 1275 | 1549 | 258 | 285 |
| P49717 | DNA replication licensing factor MCM4 (CDC21 homolog) (P1-CDC21)                                                                                                                                                    | Mcm4 (Cdc21) (Mcmd4)   | 29   | 18   | 11  | 12  |
| Q9QUI0 | Transforming protein RhoA                                                                                                                                                                                           | Rhoa (Arha) (Arha2)    | 117  | 231  | 11  | 12  |
| P10126 | Elongation factor 1-alpha 1 (EF-1-alpha-1) (Elongation factor 1 A-1) (eEF1A-1) (Elongation factor Tu) (EF-Tu)                                                                                                       | Eef1a1 (Eef1a)         | 2004 | 2344 | 305 | 330 |
| Q61820 | GTP-binding nuclear protein Ran, testis-specific isoform                                                                                                                                                            | Rasl2-9                | 564  | 570  | 23  | 24  |
| P25206 | DNA replication licensing factor MCM3 (DNA polymerase alpha holoenzyme-associated protein P1) (P1-MCM3)                                                                                                             | Mcm3 (Mcmd) (Mcmd3)    | 74   | 185  | 15  | 15  |
| P58252 | Elongation factor 2 (EF-2)                                                                                                                                                                                          | Eef2                   | 1630 | 1718 | 128 | 126 |
| P62827 | GTP-binding nuclear protein Ran (GTPase Ran) (Ras-related nuclear protein) (Ras-like protein TC4)                                                                                                                   | Ran (Rasl2-8)          | 756  | 656  | 38  | 36  |
| Q01853 | Transitional endoplasmic reticulum ATPase (TER ATPase) (15S Mg(2+)-ATPase p97 subunit) (Valosin-containing protein) (VCP)                                                                                           | Vcp                    | 691  | 699  | 56  | 51  |
| Q8VDD5 | Myosin-9 (Myosin heavy chain 9) (Myosin heavy chain, non-muscle IIa) (Non-muscle myosin heavy chain IIa) (NMMHC II-a) (NMMHC-IIA) (Cellular myosin heavy chain, type A) (Non-muscle myosin heavy chain-A) (NMMHC-A) | Myh9                   | 780  | 839  | 127 | 115 |
| Q8VHE6 | Dynein heavy chain 5, axonemal (Axonemal beta dynein heavy chain 5) (Mdnah5) (Ciliary dynein heavy chain 5)                                                                                                         | Dnah5 (Dnahc5)         | 47   | 44   | 83  | 72  |
| Q91XQ0 | Dynein heavy chain 8, axonemal (Axonemal beta dynein heavy chain 8) (Ciliary dynein heavy chain 8)                                                                                                                  | Dnahc8                 | 47   | 51   | 77  | 64  |

|        |                                                                                                                                                                                                                                                                |                                        |     |     |     |     |
|--------|----------------------------------------------------------------------------------------------------------------------------------------------------------------------------------------------------------------------------------------------------------------|----------------------------------------|-----|-----|-----|-----|
| Q6URW6 | Myosin-14 (Myosin heavy chain 14) (Myosin heavy chain, non-muscle IIc) (Non-muscle myosin heavy chain IIc) (NMHC II-C)                                                                                                                                         | Myh14                                  | 60  | 48  | 53  | 44  |
| Q8R429 | Sarcoplasmic/endoplasmic reticulum calcium ATPase 1 (SERCA1) (EC 3.6.3.8) (Calcium pump 1) (Calcium-transporting ATPase sarcoplasmic reticulum type, fast twitch skeletal muscle isoform) (SR Ca(2+)-ATPase 1) (Endoplasmic reticulum class 1/2 Ca(2+) ATPase) | Atp2a1                                 | 25  | 17  | 17  | 14  |
| Q569Z5 | Probable ATP-dependent RNA helicase DDX46 (EC 3.6.1.-) (DEAD box protein 46)                                                                                                                                                                                   | Ddx46 (Kiaa0801)                       | 25  | 17  | 21  | 17  |
| Q8VI47 | Canalicular multispecific organic anion transporter 1 (ATP-binding cassette sub-family C member 2)                                                                                                                                                             | Abcc2                                  | 31  | 38  | 39  | 31  |
| Q9JHU4 | Cytoplasmic dynein 1 heavy chain 1 (Cytoplasmic dynein heavy chain 1) (Dynein heavy chain, cytosolic)                                                                                                                                                          | Dync1h1 (Dhc1) (Dnch1) (Dnchc1) (Dyhc) | 822 | 395 | 157 | 123 |
| Q8CGK3 | Lon protease homolog, mitochondrial (EC 3.4.21.-) (Lon protease-like protein) (LONP) (Mitochondrial ATP-dependent protease Lon) (Serine protease 15)                                                                                                           | Lonp1 (Prss15)                         | 21  | 30  | 43  | 33  |
| Q8JZQ2 | AFG3-like protein 2 (EC 3.4.24.-)                                                                                                                                                                                                                              | Afg3l2                                 | 15  | 27  | 17  | 13  |
| O70228 | Probable phospholipid-transporting ATPase IIA (EC 3.6.3.1) (ATPase class II type 9A)                                                                                                                                                                           | Atp9a                                  | 31  | 29  | 37  | 28  |
| P56480 | ATP synthase subunit beta, mitochondrial (EC 3.6.3.14)                                                                                                                                                                                                         | Atp5b                                  | 31  | 50  | 8   | 6   |
| Q61656 | Probable ATP-dependent RNA helicase DDX5 (EC 3.6.1.-) (DEAD box protein 5) (RNA helicase p68) (DEAD box RNA helicase DEAD1) (mDEAD1)                                                                                                                           | Ddx5 (Tnz2)                            | 90  | 43  | 11  | 8   |

|        |                                                                                                                                                                                                                                                                                                        |                              |      |     |    |    |
|--------|--------------------------------------------------------------------------------------------------------------------------------------------------------------------------------------------------------------------------------------------------------------------------------------------------------|------------------------------|------|-----|----|----|
| P61294 | Ras-related protein Rab-6B                                                                                                                                                                                                                                                                             | Rab6b<br>(D9Bwg0185e)        | 18   | 53  | 10 | 7  |
| Q91YJ5 | Translation initiation factor IF-2, mitochondrial (IF-2Mt) (IF2(mt)) (IF-2(Mt))                                                                                                                                                                                                                        | Mtif2                        | 29   | 23  | 13 | 9  |
| Q9CWF2 | Tubulin beta-2B chain                                                                                                                                                                                                                                                                                  | Tubb2b                       | 1435 | 825 | 86 | 59 |
| P68040 | Guanine nucleotide-binding protein subunit beta-2-like 1 (Receptor of activated protein kinase C 1) (RACK1) (Receptor for activated C kinase) (p205) (12-3)                                                                                                                                            | Gnb2l1 (Gnb2-rs1)            | 541  | 153 | 35 | 24 |
| P99024 | Tubulin beta-5 chain                                                                                                                                                                                                                                                                                   | Tubb5                        | 1377 | 976 | 88 | 60 |
| P68372 | Tubulin beta-2C chain                                                                                                                                                                                                                                                                                  | Tubb2c                       | 1300 | 891 | 78 | 51 |
| Q8CG48 | Structural maintenance of chromosomes protein 2 (Chromosome-associated protein E) (XCAP-E homolog) (FGF-inducible protein 16)                                                                                                                                                                          | Smc2 (Cape) (Fin16) (Smc2l1) | 32   | 36  | 41 | 26 |
| Q7TMM9 | Tubulin beta-2A chain                                                                                                                                                                                                                                                                                  | Tubb2a (Tubb2)               | 1422 | 775 | 83 | 52 |
| Q61983 | Sodium-dependent phosphate transport protein 1 (Sodium/phosphate cotransporter 1) (Na(+)/PI cotransporter 1) (Solute carrier family 17 member 1) (Renal sodium-dependent phosphate transport protein 1) (Renal sodium-phosphate transport protein 1) (Renal Na(+)-dependent phosphate cotransporter 1) | Slc17a1 (Npt1)               | 31   | 33  | 8  | 5  |
| Q8C7H1 | Methylmalonic aciduria type A homolog, mitochondrial                                                                                                                                                                                                                                                   | Mmaa                         | 31   | 37  | 16 | 10 |
| Q61879 | Myosin-10 (Myosin heavy chain 10) (Myosin heavy chain, non-muscle IIb) (Non-muscle myosin heavy chain IIb) (NMMHC II-b) (NMMHC-IIb) (Cellular myosin heavy chain, type B) (Non-muscle myosin heavy chain-B) (NMMHC-B)                                                                                  | Myh10                        | 122  | 101 | 65 | 40 |

|                                                                                    |        |                                                                                                               |                                |      |      |     |    |
|------------------------------------------------------------------------------------|--------|---------------------------------------------------------------------------------------------------------------|--------------------------------|------|------|-----|----|
|                                                                                    | Q9QWK5 | Baculoviral IAP repeat-containing protein 1a (Neuronal apoptosis inhibitory protein 1)                        | Naip1 (Birc1a) (Naip)          | 21   | 28   | 20  | 12 |
|                                                                                    | P10630 | Eukaryotic initiation factor 4A-II (eIF-4A-II) (eIF4A-II) (EC 3.6.1.-) (ATP-dependent RNA helicase eIF4A-2)   | Eif4a2 (Ddx2b)                 | 194  | 78   | 17  | 10 |
|                                                                                    | P63017 | Heat shock cognate 71 kDa protein (Heat shock 70 kDa protein 8)                                               | Hspa8 (Hsc70) (Hsc73)          | 1719 | 959  | 119 | 70 |
|                                                                                    | Q9QUK4 | Baculoviral IAP repeat-containing protein 1b (Neuronal apoptosis inhibitory protein 2)                        | Naip2 (Birc1b) (Naip-rs6)      | 21   | 28   | 14  | 8  |
|                                                                                    | Q8K2I9 | F-box only protein 18 (EC 3.6.1.-) (F-box DNA helicase 1)                                                     | Fbxo18 (Fbh1) (Fbx18)          | 30   | 23   | 9   | 5  |
|                                                                                    | Q9D6F9 | Tubulin beta-4 chain                                                                                          | Tubb4                          | 888  | 493  | 58  | 31 |
|                                                                                    | Q922F4 | Tubulin beta-6 chain                                                                                          | Tubb6                          | 583  | 382  | 40  | 21 |
|                                                                                    | Q9ERD7 | Tubulin beta-3 chain                                                                                          | Tubb3                          | 780  | 383  | 52  | 27 |
| hydrolase activity, acting on acid anhydrides, in phosphorus-containing anhydrides | Q3TCT4 | Ectonucleoside triphosphate diphosphohydrolase 7 (NTPDase 7) (EC 3.6.1.-) (Lysosomal apyrase-like protein 1)  | Entpd7 (Kiaa4066) (Lalp1)      | 16   | 33   | 42  | 80 |
|                                                                                    | P97311 | DNA replication licensing factor MCM6 (Mis5 homolog)                                                          | Mcm6 (Mcmd6) (Mis5)            | 110  | 395  | 20  | 38 |
|                                                                                    | Q9Z129 | ATP-dependent DNA helicase Q1 (EC 3.6.1.-) (DNA-dependent ATPase Q1)                                          | Recq1 (Recq1)                  | 17   | 27   | 13  | 22 |
|                                                                                    | Q501J6 | Probable ATP-dependent RNA helicase DDX17 (EC 3.6.1.-) (DEAD box protein 17)                                  | Ddx17                          | 90   | 43   | 7   | 11 |
|                                                                                    | P63001 | Ras-related C3 botulinum toxin substrate 1 (p21-Rac1)                                                         | Rac1                           | 31   | 99   | 7   | 11 |
|                                                                                    | Q9WVP9 | Interferon-induced GTP-binding protein Mx2 (Myxovirus resistance protein 2)                                   | Mx2                            | 32   | 22   | 14  | 20 |
|                                                                                    | P05214 | Tubulin alpha-3 chain (Tubulin alpha-3/alpha-7 chain) (Alpha-tubulin 3/7) (Alpha-tubulin isotype M-alpha-3/7) | Tuba3a (Tuba3); Tuba3b (Tuba7) | 1112 | 1288 | 61  | 84 |

|        |                                                                                                                                                                                                                                                       |                       |     |     |     |     |
|--------|-------------------------------------------------------------------------------------------------------------------------------------------------------------------------------------------------------------------------------------------------------|-----------------------|-----|-----|-----|-----|
| P27641 | ATP-dependent DNA helicase 2 subunit 2 (EC 3.6.1.-) (ATP-dependent DNA helicase II 80 kDa subunit) (Ku autoantigen protein p86 homolog) (Ku80) (CTC box-binding factor 85 kDa subunit) (CTCBF) (CTC85) (Nuclear factor IV) (DNA repair protein XRCC5) | Xrcc5 (G22p2)         | 22  | 29  | 16  | 22  |
| Q5SXJ3 | Fanconi anemia group J protein homolog (Protein FACJ) (EC 3.6.1.-) (ATP-dependent RNA helicase BRIP1) (BRCA1-interacting protein C-terminal helicase 1) (BRCA1-interacting protein 1) (BRCA1-associated C-terminal helicase 1)                        | Brip1 (Bach1) (Fancj) | 25  | 18  | 13  | 17  |
| P63321 | Ras-related protein Ral-A                                                                                                                                                                                                                             | Rala (Ral) (Rala)     | 25  | 22  | 30  | 39  |
| Q61496 | Probable ATP-dependent RNA helicase DDX4 (EC 3.6.1.-) (DEAD box protein 4) (Vasa homolog) (Mvh)                                                                                                                                                       | Ddx4 (Vasa)           | 17  | 25  | 44  | 56  |
| Q60848 | Lymphocyte-specific helicase (EC 3.6.1.-) (Proliferation associated SNF2-like protein)                                                                                                                                                                | Hells (Lsh) (Pasg)    | 37  | 35  | 10  | 12  |
| Q60575 | Kinesin-like protein KIF1B                                                                                                                                                                                                                            | Kif1b                 | 45  | 95  | 30  | 36  |
| O08810 | 116 kDa U5 small nuclear ribonucleoprotein component (U5 snRNP-specific protein, 116 kDa) (U5-116 kDa) (Elongation factor Tu GTP-binding domain-containing protein 2)                                                                                 | Eftud2 (Snrp116)      | 80  | 68  | 21  | 25  |
| Q9R0K7 | Plasma membrane calcium-transporting ATPase 2 (PMCA2) (EC 3.6.3.8) (Plasma membrane calcium ATPase isoform 2) (Plasma membrane calcium pump isoform 2)                                                                                                | Atp2b2 (Pmca2)        | 32  | 27  | 70  | 83  |
| Q8C3X4 | GTP-binding protein GUF1 homolog                                                                                                                                                                                                                      | Guf1                  | 311 | 506 | 412 | 483 |
| P49718 | DNA replication licensing factor MCM5 (CDC46 homolog) (P1-CDC46)                                                                                                                                                                                      | Mcm5 (Cdc46) (Mcmd5)  | 40  | 20  | 18  | 21  |

|        |                                                                                                                                                                                                                     |                        |      |      |     |     |
|--------|---------------------------------------------------------------------------------------------------------------------------------------------------------------------------------------------------------------------|------------------------|------|------|-----|-----|
| P62631 | Elongation factor 1-alpha 2 (EF-1-alpha-2) (Elongation factor 1 A-2) (eEF1A-2) (Statin S1)                                                                                                                          | Eef1a2 (Eef1a1) (Strn) | 1275 | 1549 | 258 | 285 |
| P49717 | DNA replication licensing factor MCM4 (CDC21 homolog) (P1-CDC21)                                                                                                                                                    | Mcm4 (Cdc21) (Mcmd4)   | 29   | 18   | 11  | 12  |
| Q9QUI0 | Transforming protein RhoA                                                                                                                                                                                           | Rhoa (Arha) (Arha2)    | 117  | 231  | 11  | 12  |
| P10126 | Elongation factor 1-alpha 1 (EF-1-alpha-1) (Elongation factor 1 A-1) (eEF1A-1) (Elongation factor Tu) (EF-Tu)                                                                                                       | Eef1a1 (Eef1a)         | 2004 | 2344 | 305 | 330 |
| Q61820 | GTP-binding nuclear protein Ran, testis-specific isoform                                                                                                                                                            | Rasl2-9                | 564  | 570  | 23  | 24  |
| P25206 | DNA replication licensing factor MCM3 (DNA polymerase alpha holoenzyme-associated protein P1) (P1-MCM3)                                                                                                             | Mcm3 (Mcmd) (Mcmd3)    | 74   | 185  | 15  | 15  |
| P58252 | Elongation factor 2 (EF-2)                                                                                                                                                                                          | Eef2                   | 1630 | 1718 | 128 | 126 |
| P62827 | GTP-binding nuclear protein Ran (GTPase Ran) (Ras-related nuclear protein) (Ras-like protein TC4)                                                                                                                   | Ran (Rasl2-8)          | 756  | 656  | 38  | 36  |
| Q01853 | Transitional endoplasmic reticulum ATPase (TER ATPase) (15S Mg(2+)-ATPase p97 subunit) (Valosin-containing protein) (VCP)                                                                                           | Vcp                    | 691  | 699  | 56  | 51  |
| Q8VDD5 | Myosin-9 (Myosin heavy chain 9) (Myosin heavy chain, non-muscle IIa) (Non-muscle myosin heavy chain IIa) (NMMHC II-a) (NMMHC-IIA) (Cellular myosin heavy chain, type A) (Non-muscle myosin heavy chain-A) (NMMHC-A) | Myh9                   | 780  | 839  | 127 | 115 |
| Q8VHE6 | Dynein heavy chain 5, axonemal (Axonemal beta dynein heavy chain 5) (Mdnah5) (Ciliary dynein heavy chain 5)                                                                                                         | Dnah5 (Dnahc5)         | 47   | 44   | 83  | 72  |
| Q91XQ0 | Dynein heavy chain 8, axonemal (Axonemal beta dynein heavy chain 8) (Ciliary dynein heavy chain 8)                                                                                                                  | Dnahc8                 | 47   | 51   | 77  | 64  |

|        |                                                                                                                                                                                                                                                                |                                        |     |     |     |     |
|--------|----------------------------------------------------------------------------------------------------------------------------------------------------------------------------------------------------------------------------------------------------------------|----------------------------------------|-----|-----|-----|-----|
| Q6URW6 | Myosin-14 (Myosin heavy chain 14) (Myosin heavy chain, non-muscle IIc) (Non-muscle myosin heavy chain IIc) (NMHC II-C)                                                                                                                                         | Myh14                                  | 60  | 48  | 53  | 44  |
| Q8R429 | Sarcoplasmic/endoplasmic reticulum calcium ATPase 1 (SERCA1) (EC 3.6.3.8) (Calcium pump 1) (Calcium-transporting ATPase sarcoplasmic reticulum type, fast twitch skeletal muscle isoform) (SR Ca(2+)-ATPase 1) (Endoplasmic reticulum class 1/2 Ca(2+) ATPase) | Atp2a1                                 | 25  | 17  | 17  | 14  |
| Q569Z5 | Probable ATP-dependent RNA helicase DDX46 (EC 3.6.1.-) (DEAD box protein 46)                                                                                                                                                                                   | Ddx46 (Kiaa0801)                       | 25  | 17  | 21  | 17  |
| Q8VI47 | Canalicular multispecific organic anion transporter 1 (ATP-binding cassette sub-family C member 2)                                                                                                                                                             | Abcc2                                  | 31  | 38  | 39  | 31  |
| Q9JHU4 | Cytoplasmic dynein 1 heavy chain 1 (Cytoplasmic dynein heavy chain 1) (Dynein heavy chain, cytosolic)                                                                                                                                                          | Dync1h1 (Dhc1) (Dnch1) (Dnchc1) (Dyhc) | 822 | 395 | 157 | 123 |
| Q8CGK3 | Lon protease homolog, mitochondrial (EC 3.4.21.-) (Lon protease-like protein) (LONP) (Mitochondrial ATP-dependent protease Lon) (Serine protease 15)                                                                                                           | Lonp1 (Prss15)                         | 21  | 30  | 43  | 33  |
| Q8JZQ2 | AFG3-like protein 2 (EC 3.4.24.-)                                                                                                                                                                                                                              | Afg3l2                                 | 15  | 27  | 17  | 13  |
| O70228 | Probable phospholipid-transporting ATPase IIA (EC 3.6.3.1) (ATPase class II type 9A)                                                                                                                                                                           | Atp9a                                  | 31  | 29  | 37  | 28  |
| P56480 | ATP synthase subunit beta, mitochondrial (EC 3.6.3.14)                                                                                                                                                                                                         | Atp5b                                  | 31  | 50  | 8   | 6   |
| Q61656 | Probable ATP-dependent RNA helicase DDX5 (EC 3.6.1.-) (DEAD box protein 5) (RNA helicase p68) (DEAD box RNA helicase DEAD1) (mDEAD1)                                                                                                                           | Ddx5 (Tnz2)                            | 90  | 43  | 11  | 8   |



|        |                                                                                                                                                                                                                                                                                                        |                              |      |     |    |    |
|--------|--------------------------------------------------------------------------------------------------------------------------------------------------------------------------------------------------------------------------------------------------------------------------------------------------------|------------------------------|------|-----|----|----|
| P61294 | Ras-related protein Rab-6B                                                                                                                                                                                                                                                                             | Rab6b<br>(D9Bwg0185e)        | 18   | 53  | 10 | 7  |
| Q91YJ5 | Translation initiation factor IF-2, mitochondrial (IF-2Mt) (IF2(mt)) (IF-2(Mt))                                                                                                                                                                                                                        | Mtif2                        | 29   | 23  | 13 | 9  |
| Q9CWF2 | Tubulin beta-2B chain                                                                                                                                                                                                                                                                                  | Tubb2b                       | 1435 | 825 | 86 | 59 |
| P68040 | Guanine nucleotide-binding protein subunit beta-2-like 1 (Receptor of activated protein kinase C 1) (RACK1) (Receptor for activated C kinase) (p205) (12-3)                                                                                                                                            | Gnb2l1 (Gnb2-rs1)            | 541  | 153 | 35 | 24 |
| P99024 | Tubulin beta-5 chain                                                                                                                                                                                                                                                                                   | Tubb5                        | 1377 | 976 | 88 | 60 |
| P68372 | Tubulin beta-2C chain                                                                                                                                                                                                                                                                                  | Tubb2c                       | 1300 | 891 | 78 | 51 |
| Q8CG48 | Structural maintenance of chromosomes protein 2 (Chromosome-associated protein E) (XCAP-E homolog) (FGF-inducible protein 16)                                                                                                                                                                          | Smc2 (Cape) (Fin16) (Smc2l1) | 32   | 36  | 41 | 26 |
| Q7TMM9 | Tubulin beta-2A chain                                                                                                                                                                                                                                                                                  | Tubb2a (Tubb2)               | 1422 | 775 | 83 | 52 |
| Q61983 | Sodium-dependent phosphate transport protein 1 (Sodium/phosphate cotransporter 1) (Na(+)/PI cotransporter 1) (Solute carrier family 17 member 1) (Renal sodium-dependent phosphate transport protein 1) (Renal sodium-phosphate transport protein 1) (Renal Na(+)-dependent phosphate cotransporter 1) | Slc17a1 (Npt1)               | 31   | 33  | 8  | 5  |
| Q8C7H1 | Methylmalonic aciduria type A homolog, mitochondrial                                                                                                                                                                                                                                                   | Mmaa                         | 31   | 37  | 16 | 10 |
| Q61879 | Myosin-10 (Myosin heavy chain 10) (Myosin heavy chain, non-muscle IIb) (Non-muscle myosin heavy chain IIb) (NMMHC II-b) (NMMHC-IIb) (Cellular myosin heavy chain, type B) (Non-muscle myosin heavy chain-B) (NMMHC-B)                                                                                  | Myh10                        | 122  | 101 | 65 | 40 |

|                          |        |                                                                                                               |                                |      |      |     |    |
|--------------------------|--------|---------------------------------------------------------------------------------------------------------------|--------------------------------|------|------|-----|----|
|                          | Q9QWK5 | Baculoviral IAP repeat-containing protein 1a (Neuronal apoptosis inhibitory protein 1)                        | Naip1 (Birc1a) (Naip)          | 21   | 28   | 20  | 12 |
|                          | P10630 | Eukaryotic initiation factor 4A-II (eIF-4A-II) (eIF4A-II) (EC 3.6.1.-) (ATP-dependent RNA helicase eIF4A-2)   | Eif4a2 (Ddx2b)                 | 194  | 78   | 17  | 10 |
|                          | P63017 | Heat shock cognate 71 kDa protein (Heat shock 70 kDa protein 8)                                               | Hspa8 (Hsc70) (Hsc73)          | 1719 | 959  | 119 | 70 |
|                          | Q9QUK4 | Baculoviral IAP repeat-containing protein 1b (Neuronal apoptosis inhibitory protein 2)                        | Naip2 (Birc1b) (Naip-rs6)      | 21   | 28   | 14  | 8  |
|                          | Q8K2I9 | F-box only protein 18 (EC 3.6.1.-) (F-box DNA helicase 1)                                                     | Fbxo18 (Fbh1) (Fbx18)          | 30   | 23   | 9   | 5  |
|                          | Q9D6F9 | Tubulin beta-4 chain                                                                                          | Tubb4                          | 888  | 493  | 58  | 31 |
|                          | Q922F4 | Tubulin beta-6 chain                                                                                          | Tubb6                          | 583  | 382  | 40  | 21 |
|                          | Q9ERD7 | Tubulin beta-3 chain                                                                                          | Tubb3                          | 780  | 383  | 52  | 27 |
| pyrophosphatase activity | Q3TCT4 | Ectonucleoside triphosphate diphosphohydrolase 7 (NTPDase 7) (EC 3.6.1.-) (Lysosomal apyrase-like protein 1)  | Entpd7 (Kiaa4066) (Lalp1)      | 16   | 33   | 42  | 80 |
|                          | P97311 | DNA replication licensing factor MCM6 (Mis5 homolog)                                                          | Mcm6 (Mcmd6) (Mis5)            | 110  | 395  | 20  | 38 |
|                          | Q9Z129 | ATP-dependent DNA helicase Q1 (EC 3.6.1.-) (DNA-dependent ATPase Q1)                                          | Recq1 (Recq1)                  | 17   | 27   | 13  | 22 |
|                          | Q501J6 | Probable ATP-dependent RNA helicase DDX17 (EC 3.6.1.-) (DEAD box protein 17)                                  | Ddx17                          | 90   | 43   | 7   | 11 |
|                          | P63001 | Ras-related C3 botulinum toxin substrate 1 (p21-Rac1)                                                         | Rac1                           | 31   | 99   | 7   | 11 |
|                          | Q9WVP9 | Interferon-induced GTP-binding protein Mx2 (Myxovirus resistance protein 2)                                   | Mx2                            | 32   | 22   | 14  | 20 |
|                          | P05214 | Tubulin alpha-3 chain (Tubulin alpha-3/alpha-7 chain) (Alpha-tubulin 3/7) (Alpha-tubulin isotype M-alpha-3/7) | Tuba3a (Tuba3); Tuba3b (Tuba7) | 1112 | 1288 | 61  | 84 |

|        |                                                                                                                                                                                                                                                       |                       |     |     |     |     |
|--------|-------------------------------------------------------------------------------------------------------------------------------------------------------------------------------------------------------------------------------------------------------|-----------------------|-----|-----|-----|-----|
| P27641 | ATP-dependent DNA helicase 2 subunit 2 (EC 3.6.1.-) (ATP-dependent DNA helicase II 80 kDa subunit) (Ku autoantigen protein p86 homolog) (Ku80) (CTC box-binding factor 85 kDa subunit) (CTCBF) (CTC85) (Nuclear factor IV) (DNA repair protein XRCC5) | Xrcc5 (G22p2)         | 22  | 29  | 16  | 22  |
| Q5SXJ3 | Fanconi anemia group J protein homolog (Protein FACJ) (EC 3.6.1.-) (ATP-dependent RNA helicase BRIP1) (BRCA1-interacting protein C-terminal helicase 1) (BRCA1-interacting protein 1) (BRCA1-associated C-terminal helicase 1)                        | Brip1 (Bach1) (Fancj) | 25  | 18  | 13  | 17  |
| P63321 | Ras-related protein Ral-A                                                                                                                                                                                                                             | Rala (Ral) (Rala)     | 25  | 22  | 30  | 39  |
| Q61496 | Probable ATP-dependent RNA helicase DDX4 (EC 3.6.1.-) (DEAD box protein 4) (Vasa homolog) (Mvh)                                                                                                                                                       | Ddx4 (Vasa)           | 17  | 25  | 44  | 56  |
| Q60848 | Lymphocyte-specific helicase (EC 3.6.1.-) (Proliferation associated SNF2-like protein)                                                                                                                                                                | Hells (Lsh) (Pasg)    | 37  | 35  | 10  | 12  |
| Q60575 | Kinesin-like protein KIF1B                                                                                                                                                                                                                            | Kif1b                 | 45  | 95  | 30  | 36  |
| O08810 | 116 kDa U5 small nuclear ribonucleoprotein component (U5 snRNP-specific protein, 116 kDa) (U5-116 kDa) (Elongation factor Tu GTP-binding domain-containing protein 2)                                                                                 | Eftud2 (Snrp116)      | 80  | 68  | 21  | 25  |
| Q9R0K7 | Plasma membrane calcium-transporting ATPase 2 (PMCA2) (EC 3.6.3.8) (Plasma membrane calcium ATPase isoform 2) (Plasma membrane calcium pump isoform 2)                                                                                                | Atp2b2 (Pmca2)        | 32  | 27  | 70  | 83  |
| Q8C3X4 | GTP-binding protein GUF1 homolog                                                                                                                                                                                                                      | Guf1                  | 311 | 506 | 412 | 483 |
| P49718 | DNA replication licensing factor MCM5 (CDC46 homolog) (P1-CDC46)                                                                                                                                                                                      | Mcm5 (Cdc46) (Mcmd5)  | 40  | 20  | 18  | 21  |

|        |                                                                                                                                                                                                                     |                        |      |      |     |     |
|--------|---------------------------------------------------------------------------------------------------------------------------------------------------------------------------------------------------------------------|------------------------|------|------|-----|-----|
| P62631 | Elongation factor 1-alpha 2 (EF-1-alpha-2) (Elongation factor 1 A-2) (eEF1A-2) (Statin S1)                                                                                                                          | Eef1a2 (Eef1a1) (Strn) | 1275 | 1549 | 258 | 285 |
| P49717 | DNA replication licensing factor MCM4 (CDC21 homolog) (P1-CDC21)                                                                                                                                                    | Mcm4 (Cdc21) (Mcmd4)   | 29   | 18   | 11  | 12  |
| Q9QUI0 | Transforming protein RhoA                                                                                                                                                                                           | Rhoa (Arha) (Arha2)    | 117  | 231  | 11  | 12  |
| P10126 | Elongation factor 1-alpha 1 (EF-1-alpha-1) (Elongation factor 1 A-1) (eEF1A-1) (Elongation factor Tu) (EF-Tu)                                                                                                       | Eef1a1 (Eef1a)         | 2004 | 2344 | 305 | 330 |
| Q61820 | GTP-binding nuclear protein Ran, testis-specific isoform                                                                                                                                                            | Rasl2-9                | 564  | 570  | 23  | 24  |
| P25206 | DNA replication licensing factor MCM3 (DNA polymerase alpha holoenzyme-associated protein P1) (P1-MCM3)                                                                                                             | Mcm3 (Mcmd) (Mcmd3)    | 74   | 185  | 15  | 15  |
| P58252 | Elongation factor 2 (EF-2)                                                                                                                                                                                          | Eef2                   | 1630 | 1718 | 128 | 126 |
| P62827 | GTP-binding nuclear protein Ran (GTPase Ran) (Ras-related nuclear protein) (Ras-like protein TC4)                                                                                                                   | Ran (Rasl2-8)          | 756  | 656  | 38  | 36  |
| Q01853 | Transitional endoplasmic reticulum ATPase (TER ATPase) (15S Mg(2+)-ATPase p97 subunit) (Valosin-containing protein) (VCP)                                                                                           | Vcp                    | 691  | 699  | 56  | 51  |
| Q8VDD5 | Myosin-9 (Myosin heavy chain 9) (Myosin heavy chain, non-muscle IIa) (Non-muscle myosin heavy chain IIa) (NMMHC II-a) (NMMHC-IIA) (Cellular myosin heavy chain, type A) (Non-muscle myosin heavy chain-A) (NMMHC-A) | Myh9                   | 780  | 839  | 127 | 115 |
| Q8VHE6 | Dynein heavy chain 5, axonemal (Axonemal beta dynein heavy chain 5) (Mdnah5) (Ciliary dynein heavy chain 5)                                                                                                         | Dnah5 (Dnahc5)         | 47   | 44   | 83  | 72  |
| Q91XQ0 | Dynein heavy chain 8, axonemal (Axonemal beta dynein heavy chain 8) (Ciliary dynein heavy chain 8)                                                                                                                  | Dnahc8                 | 47   | 51   | 77  | 64  |

|        |                                                                                                                                                                                                                                                                |                                        |     |     |     |     |
|--------|----------------------------------------------------------------------------------------------------------------------------------------------------------------------------------------------------------------------------------------------------------------|----------------------------------------|-----|-----|-----|-----|
| Q6URW6 | Myosin-14 (Myosin heavy chain 14) (Myosin heavy chain, non-muscle IIc) (Non-muscle myosin heavy chain IIc) (NMHC II-C)                                                                                                                                         | Myh14                                  | 60  | 48  | 53  | 44  |
| Q8R429 | Sarcoplasmic/endoplasmic reticulum calcium ATPase 1 (SERCA1) (EC 3.6.3.8) (Calcium pump 1) (Calcium-transporting ATPase sarcoplasmic reticulum type, fast twitch skeletal muscle isoform) (SR Ca(2+)-ATPase 1) (Endoplasmic reticulum class 1/2 Ca(2+) ATPase) | Atp2a1                                 | 25  | 17  | 17  | 14  |
| Q569Z5 | Probable ATP-dependent RNA helicase DDX46 (EC 3.6.1.-) (DEAD box protein 46)                                                                                                                                                                                   | Ddx46 (Kiaa0801)                       | 25  | 17  | 21  | 17  |
| Q8VI47 | Canalicular multispecific organic anion transporter 1 (ATP-binding cassette sub-family C member 2)                                                                                                                                                             | Abcc2                                  | 31  | 38  | 39  | 31  |
| Q9JHU4 | Cytoplasmic dynein 1 heavy chain 1 (Cytoplasmic dynein heavy chain 1) (Dynein heavy chain, cytosolic)                                                                                                                                                          | Dync1h1 (Dhc1) (Dnch1) (Dnchc1) (Dyhc) | 822 | 395 | 157 | 123 |
| Q8CGK3 | Lon protease homolog, mitochondrial (EC 3.4.21.-) (Lon protease-like protein) (LONP) (Mitochondrial ATP-dependent protease Lon) (Serine protease 15)                                                                                                           | Lonp1 (Prss15)                         | 21  | 30  | 43  | 33  |
| Q8JZQ2 | AFG3-like protein 2 (EC 3.4.24.-)                                                                                                                                                                                                                              | Afg3l2                                 | 15  | 27  | 17  | 13  |
| O70228 | Probable phospholipid-transporting ATPase IIA (EC 3.6.3.1) (ATPase class II type 9A)                                                                                                                                                                           | Atp9a                                  | 31  | 29  | 37  | 28  |
| P56480 | ATP synthase subunit beta, mitochondrial (EC 3.6.3.14)                                                                                                                                                                                                         | Atp5b                                  | 31  | 50  | 8   | 6   |
| Q61656 | Probable ATP-dependent RNA helicase DDX5 (EC 3.6.1.-) (DEAD box protein 5) (RNA helicase p68) (DEAD box RNA helicase DEAD1) (mDEAD1)                                                                                                                           | Ddx5 (Tnz2)                            | 90  | 43  | 11  | 8   |

|        |                                                                                                                                                                                                                                                                                                        |                              |      |     |    |    |
|--------|--------------------------------------------------------------------------------------------------------------------------------------------------------------------------------------------------------------------------------------------------------------------------------------------------------|------------------------------|------|-----|----|----|
| P61294 | Ras-related protein Rab-6B                                                                                                                                                                                                                                                                             | Rab6b<br>(D9Bwg0185e)        | 18   | 53  | 10 | 7  |
| Q91YJ5 | Translation initiation factor IF-2, mitochondrial (IF-2Mt) (IF2(mt)) (IF-2(Mt))                                                                                                                                                                                                                        | Mtif2                        | 29   | 23  | 13 | 9  |
| Q9CWF2 | Tubulin beta-2B chain                                                                                                                                                                                                                                                                                  | Tubb2b                       | 1435 | 825 | 86 | 59 |
| P68040 | Guanine nucleotide-binding protein subunit beta-2-like 1 (Receptor of activated protein kinase C 1) (RACK1) (Receptor for activated C kinase) (p205) (12-3)                                                                                                                                            | Gnb2l1 (Gnb2-rs1)            | 541  | 153 | 35 | 24 |
| P99024 | Tubulin beta-5 chain                                                                                                                                                                                                                                                                                   | Tubb5                        | 1377 | 976 | 88 | 60 |
| P68372 | Tubulin beta-2C chain                                                                                                                                                                                                                                                                                  | Tubb2c                       | 1300 | 891 | 78 | 51 |
| Q8CG48 | Structural maintenance of chromosomes protein 2 (Chromosome-associated protein E) (XCAP-E homolog) (FGF-inducible protein 16)                                                                                                                                                                          | Smc2 (Cape) (Fin16) (Smc2l1) | 32   | 36  | 41 | 26 |
| Q7TMM9 | Tubulin beta-2A chain                                                                                                                                                                                                                                                                                  | Tubb2a (Tubb2)               | 1422 | 775 | 83 | 52 |
| Q61983 | Sodium-dependent phosphate transport protein 1 (Sodium/phosphate cotransporter 1) (Na(+)/PI cotransporter 1) (Solute carrier family 17 member 1) (Renal sodium-dependent phosphate transport protein 1) (Renal sodium-phosphate transport protein 1) (Renal Na(+)-dependent phosphate cotransporter 1) | Slc17a1 (Npt1)               | 31   | 33  | 8  | 5  |
| Q8C7H1 | Methylmalonic aciduria type A homolog, mitochondrial                                                                                                                                                                                                                                                   | Mmaa                         | 31   | 37  | 16 | 10 |
| Q61879 | Myosin-10 (Myosin heavy chain 10) (Myosin heavy chain, non-muscle IIb) (Non-muscle myosin heavy chain IIb) (NMMHC II-b) (NMMHC-IIb) (Cellular myosin heavy chain, type B) (Non-muscle myosin heavy chain-B) (NMMHC-B)                                                                                  | Myh10                        | 122  | 101 | 65 | 40 |

|                                        |        |                                                                                                               |                                |      |      |     |     |
|----------------------------------------|--------|---------------------------------------------------------------------------------------------------------------|--------------------------------|------|------|-----|-----|
|                                        | Q9QWK5 | Baculoviral IAP repeat-containing protein 1a (Neuronal apoptosis inhibitory protein 1)                        | Naip1 (Birc1a) (Naip)          | 21   | 28   | 20  | 12  |
|                                        | P10630 | Eukaryotic initiation factor 4A-II (eIF-4A-II) (eIF4A-II) (EC 3.6.1.-) (ATP-dependent RNA helicase eIF4A-2)   | Eif4a2 (Ddx2b)                 | 194  | 78   | 17  | 10  |
|                                        | P63017 | Heat shock cognate 71 kDa protein (Heat shock 70 kDa protein 8)                                               | Hspa8 (Hsc70) (Hsc73)          | 1719 | 959  | 119 | 70  |
|                                        | Q9QUK4 | Baculoviral IAP repeat-containing protein 1b (Neuronal apoptosis inhibitory protein 2)                        | Naip2 (Birc1b) (Naip-rs6)      | 21   | 28   | 14  | 8   |
|                                        | Q8K2I9 | F-box only protein 18 (EC 3.6.1.-) (F-box DNA helicase 1)                                                     | Fbxo18 (Fbh1) (Fbx18)          | 30   | 23   | 9   | 5   |
|                                        | Q9D6F9 | Tubulin beta-4 chain                                                                                          | Tubb4                          | 888  | 493  | 58  | 31  |
|                                        | Q922F4 | Tubulin beta-6 chain                                                                                          | Tubb6                          | 583  | 382  | 40  | 21  |
|                                        | Q9ERD7 | Tubulin beta-3 chain                                                                                          | Tubb3                          | 780  | 383  | 52  | 27  |
| structural constituent of cytoskeleton | P04104 | Keratin, type II cytoskeletal 1 (Cytokeratin-1) (CK-1) (Keratin-1) (K1) (67 kDa cyto keratin) (Krt1 protein)  | Krt1 (Krt2-1)                  | 87   | 124  | 14  | 27  |
|                                        | Q61414 | Keratin, type I cytoskeletal 15 (Cytokeratin-15) (CK-15) (Keratin-15) (K15)                                   | Krt15 (Krt1-15)                | 37   | 46   | 4   | 7   |
|                                        | Q922U2 | Keratin, type II cytoskeletal 5 (Cytokeratin-5) (CK-5) (Keratin-5) (K5)                                       | Krt5 (Krt2-5)                  | 396  | 550  | 23  | 38  |
|                                        | P07744 | Keratin, type II cytoskeletal 4 (Cytokeratin-4) (CK-4) (Keratin-4) (K4) (Cytoskeletal 57 kDa keratin)         | Krt4 (Krt2-4)                  | 36   | 74   | 19  | 27  |
|                                        | P05214 | Tubulin alpha-3 chain (Tubulin alpha-3/alpha-7 chain) (Alpha-tubulin 3/7) (Alpha-tubulin isotype M-alpha-3/7) | Tuba3a (Tuba3); Tuba3b (Tuba7) | 1112 | 1288 | 61  | 84  |
|                                        | Q99M73 | Keratin, type II cuticular Hb4 (Type II hair keratin Hb4) (Keratin-84) (K84) (65 kDa type II keratin)         | Krt84 (Krt2-16) (Krt84)        | 36   | 74   | 14  | 19  |
|                                        | P20152 | Vimentin                                                                                                      | Vim                            | 1749 | 2397 | 125 | 157 |

|        |                                                                                                                                        |                                |      |      |     |     |
|--------|----------------------------------------------------------------------------------------------------------------------------------------|--------------------------------|------|------|-----|-----|
| P31001 | Desmin                                                                                                                                 | Des                            | 169  | 224  | 25  | 31  |
| P05784 | Keratin, type I cytoskeletal 18 (Cytokeratin-18) (CK-18) (Keratin-18) (K18) (Cytokeratin endo B) (Keratin D)                           | Krt18 (Kerd) (Krt1-18)         | 37   | 46   | 10  | 12  |
| Q9Z2K1 | Keratin, type I cytoskeletal 16 (Cytokeratin-16) (CK-16) (Keratin-16) (K16)                                                            | Krt16 (Krt1-16)                | 37   | 37   | 7   | 8   |
| P19001 | Keratin, type I cytoskeletal 19 (Cytokeratin-19) (CK-19) (Keratin-19) (K19)                                                            | Krt19 (Krt1-19)                | 37   | 46   | 11  | 12  |
| P26039 | Talin-1                                                                                                                                | Tln1 (Tln)                     | 123  | 161  | 41  | 42  |
| Q61781 | Keratin, type I cytoskeletal 14 (Cytokeratin-14) (CK-14) (Keratin-14) (K14)                                                            | Krt14 (Krt1-14)                | 38   | 37   | 10  | 10  |
| P08730 | Keratin, type I cytoskeletal 13 (Cytokeratin-13) (CK-13) (Keratin-13) (K13) (47 kDa cytokeratin)                                       | Krt13 (Krt1-13)                | 37   | 46   | 13  | 12  |
| P02535 | Keratin, type I cytoskeletal 10 (Cytokeratin-10) (CK-10) (Keratin-10) (K10) (56 kDa cytokeratin) (Keratin, type I cytoskeletal 59 kDa) | Krt10 (Krt1-10)                | 252  | 152  | 19  | 17  |
| Q91ZU6 | Bullous pemphigoid antigen 1, isoforms 1/2/3/4 (BPA) (Hemidesmosomal plaque protein) (Dystonia musculorum protein) (Dystonin)          | Dst (Bpag1)                    | 78   | 38   | 126 | 100 |
| Q9QWL7 | Keratin, type I cytoskeletal 17 (Cytokeratin-17) (CK-17) (Keratin-17) (K17)                                                            | Krt17 (Krt1-17)                | 38   | 46   | 14  | 11  |
| P99024 | Tubulin beta-5 chain                                                                                                                   | Tubb5                          | 1377 | 976  | 88  | 60  |
| Q62168 | Keratin, type I cuticular Ha2 (Hair keratin, type I Ha2) (Keratin-32) (K32)                                                            | Krt32 (Hka2) (Krt1-2) (Krtha2) | 39   | 36   | 9   | 6   |
| P61164 | Alpha-centractin (Centractin) (Centrosome-associated actin homolog) (Actin-RPV) (ARP1)                                                 | Actr1a (Ctrn1)                 | 247  | 124  | 27  | 18  |
| P68033 | Actin, alpha cardiac muscle 1 (Alpha-cardiac actin)                                                                                    | Actc1 (Actc)                   | 3948 | 2726 | 234 | 155 |
| P61161 | Actin-related protein 2 (Actin-like protein 2)                                                                                         | Actr2 (Arp2)                   | 247  | 124  | 28  | 18  |
| Q7TMM9 | Tubulin beta-2A chain                                                                                                                  | Tubb2a (Tubb2)                 | 1422 | 775  | 83  | 52  |



|                                     |                                                                                                                           |                                                                                                                                                                          |                     |     |     |    |    |
|-------------------------------------|---------------------------------------------------------------------------------------------------------------------------|--------------------------------------------------------------------------------------------------------------------------------------------------------------------------|---------------------|-----|-----|----|----|
|                                     | Q9D6F9                                                                                                                    | Tubulin beta-4 chain                                                                                                                                                     | Tubb4               | 888 | 493 | 58 | 31 |
|                                     | Q9ERD7                                                                                                                    | Tubulin beta-3 chain                                                                                                                                                     | Tubb3               | 780 | 383 | 52 | 27 |
| purine<br>ribonucleotide<br>binding | P97311                                                                                                                    | DNA replication licensing factor MCM6 (Mis5 homolog)                                                                                                                     | Mcm6 (Mcmd6) (Mis5) | 110 | 395 | 20 | 38 |
|                                     | O88705                                                                                                                    | Potassium/sodium hyperpolarization-activated cyclic nucleotide-gated channel 3 (Hyperpolarization-activated cation channel 3) (HAC-3)                                    | Hcn3 (Hac3)         | 75  | 67  | 8  | 15 |
|                                     | Q62159                                                                                                                    | Rho-related GTP-binding protein RhoC (Silica-induced gene 61 protein) (SIG-61)                                                                                           | Rhoc (Arhc)         | 33  | 173 | 5  | 9  |
|                                     | Q8BYC6                                                                                                                    | Serine/threonine-protein kinase TAO3 (EC 2.7.11.1) (Thousand and one amino acid protein 3)                                                                               | Taok3               | 32  | 38  | 9  | 16 |
|                                     | Q9R117                                                                                                                    | Non-receptor tyrosine-protein kinase TYK2 (EC 2.7.10.2)                                                                                                                  | Tyk2                | 27  | 30  | 15 | 26 |
|                                     | Q9Z129                                                                                                                    | ATP-dependent DNA helicase Q1 (EC 3.6.1.-) (DNA-dependent ATPase Q1)                                                                                                     | Recql (Recql1)      | 17  | 27  | 13 | 22 |
|                                     | P15532                                                                                                                    | Nucleoside diphosphate kinase A (NDP kinase A) (NDK A) (EC 2.7.4.6) (Tumor metastatic process-associated protein) (Metastasis inhibition factor NM23) (NDPK-A) (nm23-M1) | Nme1 (Nm23)         | 150 | 261 | 8  | 13 |
|                                     | Q501J6                                                                                                                    | Probable ATP-dependent RNA helicase DDX17 (EC 3.6.1.-) (DEAD box protein 17)                                                                                             | Ddx17               | 90  | 43  | 7  | 11 |
|                                     | P63001                                                                                                                    | Ras-related C3 botulinum toxin substrate 1 (p21-Rac1)                                                                                                                    | Rac1                | 31  | 99  | 7  | 11 |
|                                     | Q9Z1S0                                                                                                                    | Mitotic checkpoint serine/threonine-protein kinase BUB1 beta (EC 2.7.11.1) (MAD3/BUB1-related protein kinase) (Mitotic checkpoint kinase MAD3L)                          | Bub1b (Mad3l)       | 20  | 41  | 15 | 23 |
|                                     | Q8K386                                                                                                                    | Ras-related protein Rab-15                                                                                                                                               | Rab15               | 44  | 74  | 4  | 6  |
| P83741                              | Serine/threonine-protein kinase WNK1 (EC 2.7.11.1) (Protein kinase with no lysine 1) (Protein kinase, lysine-deficient 1) | Wnk1 (Prkwk1)                                                                                                                                                            | 56                  | 36  | 18  | 27 |    |

|        |                                                                                                                                                                                                                                                       |                                |      |      |    |    |
|--------|-------------------------------------------------------------------------------------------------------------------------------------------------------------------------------------------------------------------------------------------------------|--------------------------------|------|------|----|----|
| P35761 | Dual specificity protein kinase TTK (ESK) (PYT) (EC 2.7.12.1)                                                                                                                                                                                         | Ttk (Esk)                      | 14   | 34   | 9  | 13 |
| Q00342 | FL cytokine receptor (EC 2.7.10.1) (Tyrosine-protein kinase receptor flk-2) (Fetal liver kinase 2) (Tyrosine-protein kinase FLT3) (CD antigen CD135)                                                                                                  | Flt3 (Flk-2) (Flt3)            | 17   | 34   | 7  | 10 |
| Q9WVP9 | Interferon-induced GTP-binding protein Mx2 (Myxovirus resistance protein 2)                                                                                                                                                                           | Mx2                            | 32   | 22   | 14 | 20 |
| Q9Z1F9 | SUMO-activating enzyme subunit 2 (EC 6.3.2.-) (Ubiquitin-like 1-activating enzyme E1B) (Anthracycline-associated resistance ARX)                                                                                                                      | Uba2 (Sae2) (Uble1b)           | 62   | 77   | 10 | 14 |
| P05214 | Tubulin alpha-3 chain (Tubulin alpha-3/alpha-7 chain) (Alpha-tubulin 3/7) (Alpha-tubulin isotype M-alpha-3/7)                                                                                                                                         | Tuba3a (Tuba3); Tuba3b (Tuba7) | 1112 | 1288 | 61 | 84 |
| P17047 | Lysosome-associated membrane glycoprotein 2 (LAMP-2) (Lysosomal membrane glycoprotein type B) (LGP-B) (CD107 antigen-like family member B) (CD antigen CD107b)                                                                                        | Lamp2 (Lamp-2)                 | 26   | 29   | 8  | 11 |
| P27641 | ATP-dependent DNA helicase 2 subunit 2 (EC 3.6.1.-) (ATP-dependent DNA helicase II 80 kDa subunit) (Ku autoantigen protein p86 homolog) (Ku80) (CTC box-binding factor 85 kDa subunit) (CTCBF) (CTC85) (Nuclear factor IV) (DNA repair protein XRCC5) | Xrcc5 (G22p2)                  | 22   | 29   | 16 | 22 |
| P70296 | Phosphatidylethanolamine-binding protein 1 (PEBP-1) (HCNPPp) [Cleaved into: Hippocampal cholinergic neurostimulating peptide (HCNP)]                                                                                                                  | Pebp1 (Pbp) (Pebp)             | 532  | 730  | 25 | 33 |

|        |                                                                                                                                                                                                                                |                        |     |     |    |    |
|--------|--------------------------------------------------------------------------------------------------------------------------------------------------------------------------------------------------------------------------------|------------------------|-----|-----|----|----|
| Q5SXJ3 | Fanconi anemia group J protein homolog (Protein FACJ) (EC 3.6.1.-) (ATP-dependent RNA helicase BRIP1) (BRCA1-interacting protein C-terminal helicase 1) (BRCA1-interacting protein 1) (BRCA1-associated C-terminal helicase 1) | Brip1 (Bach1) (Fanci)  | 25  | 18  | 13 | 17 |
| Q61846 | Maternal embryonic leucine zipper kinase (EC 2.7.11.1) (Protein kinase PK38) (mPK38)                                                                                                                                           | Melk (Kiaa0175) (Pk38) | 28  | 32  | 10 | 13 |
| P63321 | Ras-related protein Ral-A                                                                                                                                                                                                      | Rala (Ral) (Rala)      | 25  | 22  | 30 | 39 |
| Q61496 | Probable ATP-dependent RNA helicase DDX4 (EC 3.6.1.-) (DEAD box protein 4) (Vasa homolog) (Mvh)                                                                                                                                | Ddx4 (Vasa)            | 17  | 25  | 44 | 56 |
| P61028 | Ras-related protein Rab-8B                                                                                                                                                                                                     | Rab8b                  | 17  | 59  | 4  | 5  |
| Q61316 | Heat shock 70 kDa protein 4 (Heat shock 70-related protein APG-2)                                                                                                                                                              | Hspa4 (Apg2) (Hsp110)  | 379 | 792 | 42 | 52 |
| Q8BU30 | Isoleucyl-tRNA synthetase, cytoplasmic (EC 6.1.1.5) (Isoleucine--tRNA ligase) (IleRS) (IRS)                                                                                                                                    | Iars                   | 85  | 46  | 30 | 37 |
| O08648 | Mitogen-activated protein kinase kinase kinase 4 (EC 2.7.11.25) (MAPK/ERK kinase kinase 4) (MEK kinase 4) (MEKK 4)                                                                                                             | Map3k4 (Mekk4)         | 37  | 16  | 19 | 23 |
| P49025 | Citron Rho-interacting kinase (CRIK) (EC 2.7.11.1) (Rho-interacting, serine/threonine-protein kinase 21)                                                                                                                       | Cit                    | 49  | 67  | 67 | 81 |
| Q60848 | Lymphocyte-specific helicase (EC 3.6.1.-) (Proliferation associated SNF2-like protein)                                                                                                                                         | Hells (Lsh) (Pasg)     | 37  | 35  | 10 | 12 |
| P80315 | T-complex protein 1 subunit delta (TCP-1-delta) (CCT-delta) (A45)                                                                                                                                                              | Cct4 (Cctd)            | 61  | 59  | 15 | 18 |
| Q60575 | Kinesin-like protein KIF1B                                                                                                                                                                                                     | Kif1b                  | 45  | 95  | 30 | 36 |
| O08810 | 116 kDa U5 small nuclear ribonucleoprotein component (U5 snRNP-specific protein, 116 kDa) (U5-116 kDa) (Elongation factor Tu GTP-binding domain-containing protein 2)                                                          | Eftud2 (Snrp116)       | 80  | 68  | 21 | 25 |

|        |                                                                                                                                                                                     |                       |      |      |     |     |
|--------|-------------------------------------------------------------------------------------------------------------------------------------------------------------------------------------|-----------------------|------|------|-----|-----|
| Q61771 | Kinesin-like protein KIF3B (Microtubule plus end-directed kinesin motor 3B)                                                                                                         | Kif3b                 | 30   | 51   | 16  | 19  |
| Q9R0K7 | Plasma membrane calcium-transporting ATPase 2 (PMCA2) (EC 3.6.3.8) (Plasma membrane calcium ATPase isoform 2) (Plasma membrane calcium pump isoform 2)                              | Atp2b2 (Pmca2)        | 32   | 27   | 70  | 83  |
| P80313 | T-complex protein 1 subunit eta (TCP-1-eta) (CCT-eta)                                                                                                                               | Cct7 (Ccth)           | 49   | 50   | 11  | 13  |
| Q8C3X4 | GTP-binding protein GUF1 homolog                                                                                                                                                    | Guf1                  | 311  | 506  | 412 | 483 |
| P49718 | DNA replication licensing factor MCM5 (CDC46 homolog) (P1-CDC46)                                                                                                                    | Mcm5 (Cdc46) (Mcmd5)  | 40   | 20   | 18  | 21  |
| P97820 | Mitogen-activated protein kinase kinase kinase 4 (EC 2.7.11.1) (MAPK/ERK kinase kinase kinase 4) (MEK kinase kinase 4) (MEKKK 4) (HPK/GCK-like kinase HGK) (Nck-interacting kinase) | Map4k4 (Nik)          | 65   | 54   | 15  | 17  |
| P26618 | Alpha-type platelet-derived growth factor receptor (EC 2.7.10.1) (PDGF-R-alpha) (CD140 antigen-like family member A) (CD antigen CD140a)                                            | Pdgfra                | 37   | 73   | 160 | 178 |
| P62631 | Elongation factor 1-alpha 2 (EF-1-alpha-2) (Elongation factor 1 A-2) (eEF1A-2) (Statin S1)                                                                                          | Eef1a2 (Eef1a1) (Stn) | 1275 | 1549 | 258 | 285 |
| P49717 | DNA replication licensing factor MCM4 (CDC21 homolog) (P1-CDC21)                                                                                                                    | Mcm4 (Cdc21) (Mcmd4)  | 29   | 18   | 11  | 12  |
| Q3THS6 | S-adenosylmethionine synthetase isoform type 2 (AdoMet synthetase 2) (EC 2.5.1.6) (Methionine adenosyltransferase 2)                                                                | Mat2a                 | 26   | 42   | 11  | 12  |
| Q9QUI0 | Transforming protein RhoA                                                                                                                                                           | Rhoa (Arha) (Arha2)   | 117  | 231  | 11  | 12  |

|        |                                                                                                                                                                                                                                       |                                    |      |      |     |     |
|--------|---------------------------------------------------------------------------------------------------------------------------------------------------------------------------------------------------------------------------------------|------------------------------------|------|------|-----|-----|
| Q99KK9 | Probable histidyl-tRNA synthetase, mitochondrial (EC 6.1.1.21) (Histidine--tRNA ligase) (HisRS) (Histidine--tRNA ligase-like)                                                                                                         | Hars2 (Harsl)                      | 20   | 41   | 22  | 24  |
| P07901 | Heat shock protein HSP 90-alpha (HSP 86) (Tumor-specific transplantation 86 kDa antigen) (TSTA)                                                                                                                                       | Hsp90aa1 (Hsp86) (Hsp86-1) (Hspca) | 1529 | 2324 | 134 | 146 |
| P38647 | Stress-70 protein, mitochondrial (75 kDa glucose-regulated protein) (GRP 75) (Heat shock 70 kDa protein 9) (Peptide-binding protein 74) (PBP74) (P66 MOT) (Mortalin)                                                                  | Hspa9 (Grp75) (Hsp74) (Hspa9a)     | 33   | 33   | 12  | 13  |
| P10126 | Elongation factor 1-alpha 1 (EF-1-alpha-1) (Elongation factor 1 A-1) (eEF1A-1) (Elongation factor Tu) (EF-Tu)                                                                                                                         | Eef1a1 (Eef1a)                     | 2004 | 2344 | 305 | 330 |
| P08113 | Endoplasmic reticulum chaperone protein (Heat shock protein 90 kDa beta member 1) (94 kDa glucose-regulated protein) (GRP94) (ERP99) (Polymorphic tumor rejection antigen 1) (Tumor rejection antigen gp96)                           | Hsp90b1 (Tra1) (Tra1)              | 221  | 298  | 25  | 27  |
| Q9Z104 | SWI/SNF-related matrix-associated actin-dependent regulator of chromatin subfamily E member 1-related (SMARCE1-related protein) (HMG box-containing protein 20B) (Structural DNA-binding protein BRAF35) (BRCA2-associated factor 35) | Hmg20b (Braf35) (Hmgx2) (Smarce1r) | 30   | 20   | 14  | 15  |
| P11984 | T-complex protein 1 subunit alpha A (TCP-1-alpha) (CCT-alpha) (Tailless complex polypeptide 1A) (TCP-1-A)                                                                                                                             | Cct1 (Ccta) (Tcp1)                 | 29   | 66   | 14  | 15  |
| Q61820 | GTP-binding nuclear protein Ran, testis-specific isoform                                                                                                                                                                              | Rasl2-9                            | 564  | 570  | 23  | 24  |
| P12367 | cAMP-dependent protein kinase type II-alpha regulatory subunit                                                                                                                                                                        | Prkar2a                            | 33   | 23   | 5   | 5   |

|        |                                                                                                                                                                                                              |                                        |      |      |     |     |
|--------|--------------------------------------------------------------------------------------------------------------------------------------------------------------------------------------------------------------|----------------------------------------|------|------|-----|-----|
| P30416 | FK506-binding protein 4 (EC 5.2.1.8) (Peptidyl-prolyl cis-trans isomerase) (PPIase) (Rotamase) (HSP-binding immunophilin) (HBI) (FKBP52 protein) (52 kDa FK506-binding protein) (FKBP59) (p59 protein)       | Fkbp4                                  | 40   | 62   | 8   | 8   |
| Q8C0N1 | Kinesin-like protein KIF2B                                                                                                                                                                                   | Kif2b                                  | 17   | 26   | 8   | 8   |
| Q80YV4 | Pantothenate kinase 4 (EC 2.7.1.33) (Pantothenic acid kinase 4) (mPanK4)                                                                                                                                     | Pank4                                  | 23   | 28   | 13  | 13  |
| P25206 | DNA replication licensing factor MCM3 (DNA polymerase alpha holoenzyme-associated protein P1) (P1-MCM3)                                                                                                      | Mcm3 (Mcmd) (Mcmd3)                    | 74   | 185  | 15  | 15  |
| Q8R4K2 | Interleukin-1 receptor-associated kinase 4 (IRAK-4) (EC 2.7.11.1)                                                                                                                                            | Irak4                                  | 32   | 47   | 22  | 22  |
| Q6P8J7 | Creatine kinase, sarcomeric mitochondrial (EC 2.7.3.2) (S-MtCK)                                                                                                                                              | Ckmt2                                  | 50   | 66   | 26  | 26  |
| P11499 | Heat shock protein HSP 90-beta (HSP 84) (Tumor-specific transplantation 84 kDa antigen) (TSTA)                                                                                                               | Hsp90ab1 (Hsp84) (Hsp84-1) (Hspcb)     | 2943 | 3523 | 208 | 205 |
| P58252 | Elongation factor 2 (EF-2)                                                                                                                                                                                   | Eef2                                   | 1630 | 1718 | 128 | 126 |
| O08638 | Myosin-11 (Myosin heavy chain 11) (Myosin heavy chain, smooth muscle isoform) (SMMHC)                                                                                                                        | Myh11                                  | 211  | 221  | 79  | 76  |
| Q9QXL1 | Kinesin-like protein KIF21B (Kinesin-like protein KIF6)                                                                                                                                                      | Kif21b (Kif6)                          | 22   | 45   | 26  | 25  |
| Q8R4B8 | NACHT, LRR and PYD domains-containing protein 3 (Cold autoinflammatory syndrome 1 protein homolog) (Cryopyrin) (PYRIN-containing APAF1-like protein 1) (Mast cell maturation-associated-inducible protein 1) | Nlrp3 (Cias1) (Mmig1) (Nalp3) (Pypaf1) | 30   | 20   | 24  | 23  |
| Q8BGQ7 | Alanyl-tRNA synthetase, cytoplasmic (EC 6.1.1.7) (Alanine--tRNA ligase) (AlaRS)                                                                                                                              | Aars                                   | 179  | 216  | 23  | 22  |
| Q91V92 | ATP-citrate synthase (EC 2.3.3.8) (ATP-citrate (pro-S)-lyase) (Citrate cleavage enzyme)                                                                                                                      | Acly                                   | 349  | 488  | 45  | 43  |

|        |                                                                                                                                                                                                                     |                     |      |      |     |     |
|--------|---------------------------------------------------------------------------------------------------------------------------------------------------------------------------------------------------------------------|---------------------|------|------|-----|-----|
| Q61768 | Kinesin-1 heavy chain (Ubiquitous kinesin heavy chain) (UKHC) (Conventional kinesin heavy chain)                                                                                                                    | Kif5b (Khcs) (Kns1) | 102  | 303  | 43  | 41  |
| P62827 | GTP-binding nuclear protein Ran (GTPase Ran) (Ras-related nuclear protein) (Ras-like protein TC4)                                                                                                                   | Ran (Rasl2-8)       | 756  | 656  | 38  | 36  |
| P30275 | Creatine kinase, ubiquitous mitochondrial (EC 2.7.3.2) (U-MtCK) (Acidic-type mitochondrial creatine kinase) (Mia-CK)                                                                                                | Ckmt1               | 205  | 121  | 32  | 30  |
| Q04447 | Creatine kinase B-type (EC 2.7.3.2) (Creatine kinase B chain) (B-CK)                                                                                                                                                | Ckb (Ckbb)          | 9079 | 7277 | 434 | 406 |
| P35969 | Vascular endothelial growth factor receptor 1 (VEGFR-1) (EC 2.7.10.1) (Tyrosine-protein kinase receptor FLT) (FLT-1) (Embryonic receptor kinase 2)                                                                  | Flt1 (Emrk2) (Flt)  | 29   | 36   | 35  | 32  |
| Q01853 | Transitional endoplasmic reticulum ATPase (TER ATPase) (15S Mg(2+)-ATPase p97 subunit) (Valosin-containing protein) (VCP)                                                                                           | Vcp                 | 691  | 699  | 56  | 51  |
| Q8CGC7 | Bifunctional aminoacyl-tRNA synthetase [Includes: Glutamyl-tRNA synthetase (EC 6.1.1.17) (Glutamate--tRNA ligase); Prolyl-tRNA synthetase (EC 6.1.1.15) (Proline--tRNA ligase)]                                     | Eprs (Qprs)         | 130  | 102  | 32  | 29  |
| Q8VDD5 | Myosin-9 (Myosin heavy chain 9) (Myosin heavy chain, non-muscle IIa) (Non-muscle myosin heavy chain IIa) (NMMHC II-a) (NMMHC-IIA) (Cellular myosin heavy chain, type A) (Non-muscle myosin heavy chain-A) (NMMHC-A) | Myh9                | 780  | 839  | 127 | 115 |
| P07310 | Creatine kinase M-type (EC 2.7.3.2) (Creatine kinase M chain) (M-CK)                                                                                                                                                | Ckm (Ckmm)          | 73   | 107  | 31  | 28  |
| Q99104 | Myosin-Va (Dilute myosin heavy chain, non-muscle)                                                                                                                                                                   | Myo5a (Dilute)      | 28   | 34   | 35  | 31  |
| P33173 | Kinesin-like protein KIF1A (Axonal transporter of synaptic vesicles)                                                                                                                                                | Kif1a (Atsv) (Kif1) | 45   | 108  | 25  | 22  |

|        |                                                                                                                                                                                                             |                                    |     |      |    |    |
|--------|-------------------------------------------------------------------------------------------------------------------------------------------------------------------------------------------------------------|------------------------------------|-----|------|----|----|
| Q02053 | Ubiquitin-like modifier-activating enzyme 1 (Ubiquitin-activating enzyme E1) (Ubiquitin-like modifier-activating enzyme 1 X) (Ubiquitin-activating enzyme E1 X)                                             | Uba1 (Sbx) (Ube1) (Ube1ax) (Ube1x) | 660 | 1086 | 63 | 55 |
| Q8VHE6 | Dynein heavy chain 5, axonemal (Axonemal beta dynein heavy chain 5) (Mdnah5) (Ciliary dynein heavy chain 5)                                                                                                 | Dnah5 (Dnahc5)                     | 47  | 44   | 83 | 72 |
| Q9Z1Q9 | Valyl-tRNA synthetase (EC 6.1.1.9) (Valine--tRNA ligase) (ValRS) (Protein G7a)                                                                                                                              | Vars (Bat6) (G7a) (Vars2)          | 380 | 302  | 37 | 32 |
| Q921E2 | Ras-related protein Rab-31                                                                                                                                                                                  | Rab31                              | 18  | 29   | 7  | 6  |
| O88866 | Hormonally up-regulated neu tumor-associated kinase (EC 2.7.11.1) (Serine/threonine-protein kinase MAK-V)                                                                                                   | Hunk (Makv)                        | 27  | 21   | 14 | 12 |
| Q9JM52 | Misshapen-like kinase 1 (EC 2.7.11.1) (Mitogen-activated protein kinase kinase kinase 6) (MAPK/ERK kinase kinase 6) (MEK kinase kinase 6) (MEKKK 6) (Misshapen/NIK-related kinase) (GCK family kinase MiNK) | Mink1 (Map4k6) (Mink)              | 18  | 54   | 13 | 11 |
| Q9CQN1 | Heat shock protein 75 kDa, mitochondrial (HSP 75) (Tumor necrosis factor type 1 receptor-associated protein) (TRAP-1) (TNFR-associated protein 1)                                                           | Trap1 (Hsp75)                      | 197 | 335  | 13 | 11 |
| P20029 | 78 kDa glucose-regulated protein (GRP 78) (Heat shock 70 kDa protein 5) (Immunoglobulin heavy chain-binding protein) (BiP)                                                                                  | Hspa5 (Grp78)                      | 262 | 312  | 25 | 21 |
| P46664 | Adenylosuccinate synthetase isozyme 2 (AMPSase 2) (AdSS 2) (EC 6.3.4.4) (Adenylosuccinate synthetase, non-muscle isozyme) (Adenylosuccinate synthetase, acidic isozyme) (IMP--aspartate ligase 2)           | Adss (Adss2)                       | 36  | 66   | 12 | 10 |
| P11983 | T-complex protein 1 subunit alpha B (TCP-1-alpha) (CCT-alpha) (Tailless complex polypeptide 1B) (TCP-1-B)                                                                                                   | Cct1 (Ccta) (Tcp1)                 | 29  | 66   | 18 | 15 |



|        |                                                                                                                                                                                                                                                                |                         |     |     |    |    |
|--------|----------------------------------------------------------------------------------------------------------------------------------------------------------------------------------------------------------------------------------------------------------------|-------------------------|-----|-----|----|----|
| Q91XQ0 | Dynein heavy chain 8, axonemal (Axonemal beta dynein heavy chain 8) (Ciliary dynein heavy chain 8)                                                                                                                                                             | Dnahc8                  | 47  | 51  | 77 | 64 |
| Q6URW6 | Myosin-14 (Myosin heavy chain 14) (Myosin heavy chain, non-muscle IIc) (Non-muscle myosin heavy chain IIc) (NMHC II-C)                                                                                                                                         | Myh14                   | 60  | 48  | 53 | 44 |
| Q8R429 | Sarcoplasmic/endoplasmic reticulum calcium ATPase 1 (SERCA1) (EC 3.6.3.8) (Calcium pump 1) (Calcium-transporting ATPase sarcoplasmic reticulum type, fast twitch skeletal muscle isoform) (SR Ca(2+)-ATPase 1) (Endoplasmic reticulum class 1/2 Ca(2+) ATPase) | Atp2a1                  | 25  | 17  | 17 | 14 |
| P80316 | T-complex protein 1 subunit epsilon (TCP-1-epsilon) (CCT-epsilon)                                                                                                                                                                                              | Cct5 (Ccte) (Kiaa0098)  | 239 | 102 | 17 | 14 |
| Q569Z5 | Probable ATP-dependent RNA helicase DDX46 (EC 3.6.1.-) (DEAD box protein 46)                                                                                                                                                                                   | Ddx46 (Kiaa0801)        | 25  | 17  | 21 | 17 |
| Q80ZW0 | Serine/threonine-protein kinase 35 (EC 2.7.11.1)                                                                                                                                                                                                               | Stk35                   | 14  | 50  | 21 | 17 |
| Q921J2 | GTP-binding protein Rheb (Ras homolog enriched in brain)                                                                                                                                                                                                       | Rheb                    | 21  | 44  | 31 | 25 |
| Q62407 | Striated muscle-specific serine/threonine protein kinase (EC 2.7.11.1) (Aortic preferentially expressed protein 1) (APEG-1)                                                                                                                                    | Speg (Apeg1) (Kiaa1297) | 26  | 20  | 31 | 25 |
| Q8VI47 | Canalicular multispecific organic anion transporter 1 (ATP-binding cassette sub-family C member 2)                                                                                                                                                             | Abcc2                   | 31  | 38  | 39 | 31 |
| Q8C196 | Carbamoyl-phosphate synthase [ammonia], mitochondrial (EC 6.3.4.16) (Carbamoyl-phosphate synthetase I) (CPSase I)                                                                                                                                              | Cps1                    | 22  | 25  | 19 | 15 |
| Q80UN9 | tRNA isopentenyltransferase, mitochondrial (IPTase) (EC 2.5.1.8) (Isopentenyl-diphosphate:tRNA isopentenyltransferase) (IPP transferase) (IPPT)                                                                                                                | Trit1 (Ipt)             | 31  | 24  | 19 | 15 |

|        |                                                                                                                                                                                                                            |                                        |     |     |     |     |
|--------|----------------------------------------------------------------------------------------------------------------------------------------------------------------------------------------------------------------------------|----------------------------------------|-----|-----|-----|-----|
| Q8CIQ7 | Dedicator of cytokinesis protein 3 (Modifier of cell adhesion) (Presenilin-binding protein) (PBP)                                                                                                                          | Dock3 (Moca)                           | 80  | 56  | 33  | 26  |
| Q9JHU4 | Cytoplasmic dynein 1 heavy chain 1 (Cytoplasmic dynein heavy chain 1) (Dynein heavy chain, cytosolic)                                                                                                                      | Dync1h1 (Dhc1) (Dnch1) (Dnchc1) (Dyhc) | 822 | 395 | 157 | 123 |
| P31254 | Ubiquitin-like modifier-activating enzyme 1 Y (Ubiquitin-activating enzyme E1 Y) (Ubiquitin-activating enzyme E1)                                                                                                          | Ube1ay (Sby) (Ube1y) (Ube1y1)          | 161 | 77  | 22  | 17  |
| Q8CGK3 | Lon protease homolog, mitochondrial (EC 3.4.21.-) (Lon protease-like protein) (LONP) (Mitochondrial ATP-dependent protease Lon) (Serine protease 15)                                                                       | Lonp1 (Prss15)                         | 21  | 30  | 43  | 33  |
| Q8JZQ2 | AFG3-like protein 2 (EC 3.4.24.-)                                                                                                                                                                                          | Afg3l2                                 | 15  | 27  | 17  | 13  |
| Q569Z6 | Thyroid hormone receptor-associated protein 3 (Thyroid hormone receptor-associated protein complex 150 kDa component) (Trap150)                                                                                            | Thrap3 (Trap150)                       | 29  | 48  | 21  | 16  |
| P16627 | Heat shock 70 kDa protein 1L (Heat shock 70 kDa protein 1-like) (Heat shock 70 kDa-like protein 1) (Spermatid-specific heat shock protein 70)                                                                              | Hspa1l (Hsc70t)                        | 319 | 238 | 33  | 25  |
| O70228 | Probable phospholipid-transporting ATPase IIA (EC 3.6.3.1) (ATPase class II type 9A)                                                                                                                                       | Atp9a                                  | 31  | 29  | 37  | 28  |
| P56480 | ATP synthase subunit beta, mitochondrial (EC 3.6.3.14)                                                                                                                                                                     | Atp5b                                  | 31  | 50  | 8   | 6   |
| Q02956 | Protein kinase C zeta type (EC 2.7.11.13) (nPKC-zeta)                                                                                                                                                                      | Prkcz (PkcZ)                           | 29  | 15  | 8   | 6   |
| Q9DBP5 | UMP-CMP kinase (EC 2.7.4.14) (Cytidylate kinase) (Deoxycytidylate kinase) (Cytidine monophosphate kinase) (Uridine monophosphate kinase) (Uridine monophosphate/cytidine monophosphate kinase) (UMP/CMP kinase) (UMP/CMPK) | Cmpk1 (Cmk) (Cmpk) (Uck) (Umk) (Umpk)  | 107 | 93  | 12  | 9   |

|        |                                                                                                                                      |                                    |      |      |     |     |
|--------|--------------------------------------------------------------------------------------------------------------------------------------|------------------------------------|------|------|-----|-----|
| Q8K045 | Serine/threonine-protein kinase N3 (EC 2.7.11.13) (Protein kinase PKN-beta) (Protein-kinase C-related kinase 3)                      | Pkn3 (Pknbeta)                     | 130  | 126  | 36  | 27  |
| P60710 | Actin, cytoplasmic 1 (Beta-actin)                                                                                                    | Actb                               | 5140 | 4496 | 282 | 208 |
| Q61656 | Probable ATP-dependent RNA helicase DDX5 (EC 3.6.1.-) (DEAD box protein 5) (RNA helicase p68) (DEAD box RNA helicase DEAD1) (mDEAD1) | Ddx5 (Tnz2)                        | 90   | 43   | 11  | 8   |
| Q61696 | Heat shock 70 kDa protein 1A (Heat shock 70 kDa protein 3) (HSP70.3) (Hsp68)                                                         | Hspa1a (Hsp70-3) (Hsp70A1)         | 266  | 236  | 33  | 24  |
| Q61699 | Heat shock protein 105 kDa (Heat shock-related 100 kDa protein E7I) (HSP-E7I) (Heat shock 110 kDa protein) (42 degrees C-HSP)        | Hsph1 (Hsp105) (Hsp110) (Kiaa0201) | 46   | 48   | 18  | 13  |
| Q8BMJ2 | Leucyl-tRNA synthetase, cytoplasmic (EC 6.1.1.4) (Leucine--tRNA ligase) (LeuRS)                                                      | Lars                               | 52   | 45   | 47  | 33  |
| P61294 | Ras-related protein Rab-6B                                                                                                           | Rab6b (D9Bwg0185e)                 | 18   | 53   | 10  | 7   |
| Q91YJ5 | Translation initiation factor IF-2, mitochondrial (IF-2Mt) (IF2(mt)) (IF-2(Mt))                                                      | Mtif2                              | 29   | 23   | 13  | 9   |
| Q9CWF2 | Tubulin beta-2B chain                                                                                                                | Tubb2b                             | 1435 | 825  | 86  | 59  |
| P99024 | Tubulin beta-5 chain                                                                                                                 | Tubb5                              | 1377 | 976  | 88  | 60  |
| Q6PHN9 | Ras-related protein Rab-35                                                                                                           | Rab35                              | 17   | 59   | 3   | 2   |
| P61164 | Alpha-centractin (Centractin) (Centrosome-associated actin homolog) (Actin-RPV) (ARP1)                                               | Actr1a (Ctrn1)                     | 247  | 124  | 27  | 18  |
| P68033 | Actin, alpha cardiac muscle 1 (Alpha-cardiac actin)                                                                                  | Actc1 (Actc)                       | 3948 | 2726 | 234 | 155 |
| P68372 | Tubulin beta-2C chain                                                                                                                | Tubb2c                             | 1300 | 891  | 78  | 51  |
| P42932 | T-complex protein 1 subunit theta (TCP-1-theta) (CCT-theta)                                                                          | Cct8 (Cctq)                        | 197  | 57   | 23  | 15  |
| P61161 | Actin-related protein 2 (Actin-like protein 2)                                                                                       | Actr2 (Arp2)                       | 247  | 124  | 28  | 18  |

|        |                                                                                                                                                                                                                               |                              |      |     |    |    |
|--------|-------------------------------------------------------------------------------------------------------------------------------------------------------------------------------------------------------------------------------|------------------------------|------|-----|----|----|
| Q8CG48 | Structural maintenance of chromosomes protein 2 (Chromosome-associated protein E) (XCAP-E homolog) (FGF-inducible protein 16)                                                                                                 | Smc2 (Cape) (Fin16) (Smc2l1) | 32   | 36  | 41 | 26 |
| Q7TMM9 | Tubulin beta-2A chain                                                                                                                                                                                                         | Tubb2a (Tubb2)               | 1422 | 775 | 83 | 52 |
| Q8C7H1 | Methylmalonic aciduria type A homolog, mitochondrial                                                                                                                                                                          | Mmaa                         | 31   | 37  | 16 | 10 |
| P17156 | Heat shock-related 70 kDa protein 2 (Heat shock protein 70.2)                                                                                                                                                                 | Hspa2 (Hcp70.2) (Hsp70-2)    | 964  | 544 | 60 | 37 |
| Q61879 | Myosin-10 (Myosin heavy chain 10) (Myosin heavy chain, non-muscle IIb) (Non-muscle myosin heavy chain IIb) (NMMHC II-b) (NMMHC-IIB) (Cellular myosin heavy chain, type B) (Non-muscle myosin heavy chain-B) (NMMHC-B)         | Myh10                        | 122  | 101 | 65 | 40 |
| Q9Z0P5 | Twinfilin-2 (Twinfilin-1-like protein) (A6-related protein) (mA6RP)                                                                                                                                                           | Twf2 (Ptk9l)                 | 29   | 32  | 10 | 6  |
| Q9QWK5 | Baculoviral IAP repeat-containing protein 1a (Neuronal apoptosis inhibitory protein 1)                                                                                                                                        | Naip1 (Birc1a) (Naip)        | 21   | 28  | 20 | 12 |
| Q9EQZ6 | Rap guanine nucleotide exchange factor 4 (cAMP-regulated guanine nucleotide exchange factor II) (cAMP-GEFII) (Exchange factor directly activated by cAMP 2) (Epac 2) (cAMP-dependent Rap1 guanine-nucleotide exchange factor) | Rapgef4 (Cgef2) (Epac2)      | 47   | 23  | 20 | 12 |
| P63038 | 60 kDa heat shock protein, mitochondrial (Heat shock protein 60) (HSP-60) (Hsp60) (60 kDa chaperonin) (Chaperonin 60) (CPN60) (Mitochondrial matrix protein P1) (HSP-65)                                                      | Hspd1 (Hsp60)                | 15   | 32  | 22 | 13 |
| P80317 | T-complex protein 1 subunit zeta (TCP-1-zeta) (CCT-zeta) (CCT-zeta-1)                                                                                                                                                         | Cct6a (Cct6) (Cctz) (Cctz1)  | 160  | 52  | 22 | 13 |

|        |                                                                                                                                                                                                                                     |                           |      |     |     |    |
|--------|-------------------------------------------------------------------------------------------------------------------------------------------------------------------------------------------------------------------------------------|---------------------------|------|-----|-----|----|
| P10630 | Eukaryotic initiation factor 4A-II (eIF-4A-II) (eIF4A-II) (EC 3.6.1.-) (ATP-dependent RNA helicase eIF4A-2)                                                                                                                         | Eif4a2 (Ddx2b)            | 194  | 78  | 17  | 10 |
| P09041 | Phosphoglycerate kinase 2 (EC 2.7.2.3) (Phosphoglycerate kinase, testis specific)                                                                                                                                                   | Pgk2 (Pgk-2)              | 162  | 73  | 17  | 10 |
| P63017 | Heat shock cognate 71 kDa protein (Heat shock 70 kDa protein 8)                                                                                                                                                                     | Hspa8 (Hsc70) (Hsc73)     | 1719 | 959 | 119 | 70 |
| P05532 | Mast/stem cell growth factor receptor (SCFR) (EC 2.7.10.1) (Proto-oncogene tyrosine-protein kinase Kit) (c-kit) (CD antigen CD117)                                                                                                  | Kit (Sl)                  | 16   | 35  | 12  | 7  |
| Q9QUK4 | Baculoviral IAP repeat-containing protein 1b (Neuronal apoptosis inhibitory protein 2)                                                                                                                                              | Naip2 (Birc1b) (Naip-rs6) | 21   | 28  | 14  | 8  |
| Q8K2I9 | F-box only protein 18 (EC 3.6.1.-) (F-box DNA helicase 1)                                                                                                                                                                           | Fbxo18 (Fbh1) (Fbx18)     | 30   | 23  | 9   | 5  |
| Q8BYH8 | Chromodomain-helicase-DNA-binding protein 9 (CHD-9) (EC 3.6.1.-) (ATP-dependent helicase CHD9) (Peroxisomal proliferator-activated receptor A-interacting complex 320 kDa protein) (PPAR-alpha-interacting complex protein 320 kDa) | Chd9 (Kiaa0308) (Pric320) | 39   | 27  | 49  | 27 |
| Q9WTU3 | Sodium channel protein type 8 subunit alpha (Sodium channel protein type VIII subunit alpha) (Voltage-gated sodium channel subunit alpha Nav1.6)                                                                                    | Scn8a (Nbna1)             | 28   | 19  | 20  | 11 |
| Q9D6F9 | Tubulin beta-4 chain                                                                                                                                                                                                                | Tubb4                     | 888  | 493 | 58  | 31 |
| Q61390 | T-complex protein 1 subunit zeta-2 (TCP-1-zeta-2) (CCT-zeta-2) (Cctz-2)                                                                                                                                                             | Cct6b                     | 55   | 52  | 15  | 8  |
| Q922F4 | Tubulin beta-6 chain                                                                                                                                                                                                                | Tubb6                     | 583  | 382 | 40  | 21 |
| Q9ERD7 | Tubulin beta-3 chain                                                                                                                                                                                                                | Tubb3                     | 780  | 383 | 52  | 27 |
| Q80UE6 | Serine/threonine-protein kinase WNK4 (EC 2.7.11.1) (Protein kinase with no lysine 4) (Protein kinase, lysine-deficient 4)                                                                                                           | Wnk4 (Prkwnk4)            | 23   | 33  | 29  | 15 |

|                        |        |                                                                                                                                                                          |                     |     |     |    |    |
|------------------------|--------|--------------------------------------------------------------------------------------------------------------------------------------------------------------------------|---------------------|-----|-----|----|----|
| ribonucleotide binding | P97311 | DNA replication licensing factor MCM6 (Mis5 homolog)                                                                                                                     | Mcm6 (Mcmd6) (Mis5) | 110 | 395 | 20 | 38 |
|                        | O88705 | Potassium/sodium hyperpolarization-activated cyclic nucleotide-gated channel 3 (Hyperpolarization-activated cation channel 3) (HAC-3)                                    | Hcn3 (Hac3)         | 75  | 67  | 8  | 15 |
|                        | Q62159 | Rho-related GTP-binding protein RhoC (Silica-induced gene 61 protein) (SIG-61)                                                                                           | Rhoc (Arhc)         | 33  | 173 | 5  | 9  |
|                        | Q8BYC6 | Serine/threonine-protein kinase TAO3 (EC 2.7.11.1) (Thousand and one amino acid protein 3)                                                                               | Taok3               | 32  | 38  | 9  | 16 |
|                        | Q9R117 | Non-receptor tyrosine-protein kinase TYK2 (EC 2.7.10.2)                                                                                                                  | Tyk2                | 27  | 30  | 15 | 26 |
|                        | Q9Z129 | ATP-dependent DNA helicase Q1 (EC 3.6.1.-) (DNA-dependent ATPase Q1)                                                                                                     | Recql (Recql1)      | 17  | 27  | 13 | 22 |
|                        | P15532 | Nucleoside diphosphate kinase A (NDP kinase A) (NDK A) (EC 2.7.4.6) (Tumor metastatic process-associated protein) (Metastasis inhibition factor NM23) (NDPK-A) (nm23-M1) | Nme1 (Nm23)         | 150 | 261 | 8  | 13 |
|                        | Q501J6 | Probable ATP-dependent RNA helicase DDX17 (EC 3.6.1.-) (DEAD box protein 17)                                                                                             | Ddx17               | 90  | 43  | 7  | 11 |
|                        | P63001 | Ras-related C3 botulinum toxin substrate 1 (p21-Rac1)                                                                                                                    | Rac1                | 31  | 99  | 7  | 11 |
|                        | Q9Z1S0 | Mitotic checkpoint serine/threonine-protein kinase BUB1 beta (EC 2.7.11.1) (MAD3/BUB1-related protein kinase) (Mitotic checkpoint kinase MAD3L)                          | Bub1b (Mad3l)       | 20  | 41  | 15 | 23 |
|                        | Q8K386 | Ras-related protein Rab-15                                                                                                                                               | Rab15               | 44  | 74  | 4  | 6  |
|                        | P83741 | Serine/threonine-protein kinase WNK1 (EC 2.7.11.1) (Protein kinase with no lysine 1) (Protein kinase, lysine-deficient 1)                                                | Wnk1 (Prkwnk1)      | 56  | 36  | 18 | 27 |
|                        | P35761 | Dual specificity protein kinase TTK (ESK) (PYT) (EC 2.7.12.1)                                                                                                            | Ttk (Esk)           | 14  | 34  | 9  | 13 |

|        |                                                                                                                                                                                                                                                       |                                |      |      |    |    |
|--------|-------------------------------------------------------------------------------------------------------------------------------------------------------------------------------------------------------------------------------------------------------|--------------------------------|------|------|----|----|
| Q00342 | FL cytokine receptor (EC 2.7.10.1) (Tyrosine-protein kinase receptor flk-2) (Fetal liver kinase 2) (Tyrosine-protein kinase FLT3) (CD antigen CD135)                                                                                                  | Flt3 (Flk-2) (Flt3)            | 17   | 34   | 7  | 10 |
| Q9WVP9 | Interferon-induced GTP-binding protein Mx2 (Myxovirus resistance protein 2)                                                                                                                                                                           | Mx2                            | 32   | 22   | 14 | 20 |
| Q9Z1F9 | SUMO-activating enzyme subunit 2 (EC 6.3.2.-) (Ubiquitin-like 1-activating enzyme E1B) (Anthracycline-associated resistance ARX)                                                                                                                      | Uba2 (Sae2) (Uble1b)           | 62   | 77   | 10 | 14 |
| P05214 | Tubulin alpha-3 chain (Tubulin alpha-3/alpha-7 chain) (Alpha-tubulin 3/7) (Alpha-tubulin isotype M-alpha-3/7)                                                                                                                                         | Tuba3a (Tuba3); Tuba3b (Tuba7) | 1112 | 1288 | 61 | 84 |
| P17047 | Lysosome-associated membrane glycoprotein 2 (LAMP-2) (Lysosomal membrane glycoprotein type B) (LGP-B) (CD107 antigen-like family member B) (CD antigen CD107b)                                                                                        | Lamp2 (Lamp-2)                 | 26   | 29   | 8  | 11 |
| P27641 | ATP-dependent DNA helicase 2 subunit 2 (EC 3.6.1.-) (ATP-dependent DNA helicase II 80 kDa subunit) (Ku autoantigen protein p86 homolog) (Ku80) (CTC box-binding factor 85 kDa subunit) (CTCBF) (CTC85) (Nuclear factor IV) (DNA repair protein XRCC5) | Xrcc5 (G22p2)                  | 22   | 29   | 16 | 22 |
| P70296 | Phosphatidylethanolamine-binding protein 1 (PEBP-1) (HCNPpp) [Cleaved into: Hippocampal cholinergic neurostimulating peptide (HCNP)]                                                                                                                  | Pebp1 (Pbp) (Pebp)             | 532  | 730  | 25 | 33 |
| Q5SXJ3 | Fanconi anemia group J protein homolog (Protein FACJ) (EC 3.6.1.-) (ATP-dependent RNA helicase BRIP1) (BRCA1-interacting protein C-terminal helicase 1) (BRCA1-interacting protein 1) (BRCA1-associated C-terminal helicase 1)                        | Brip1 (Bach1) (Fancj)          | 25   | 18   | 13 | 17 |

|        |                                                                                                                                                                       |                        |     |     |    |    |
|--------|-----------------------------------------------------------------------------------------------------------------------------------------------------------------------|------------------------|-----|-----|----|----|
| Q61846 | Maternal embryonic leucine zipper kinase (EC 2.7.11.1) (Protein kinase PK38) (mPK38)                                                                                  | Melk (Kiaa0175) (Pk38) | 28  | 32  | 10 | 13 |
| P63321 | Ras-related protein Ral-A                                                                                                                                             | Rala (Ral) (Rala)      | 25  | 22  | 30 | 39 |
| Q61496 | Probable ATP-dependent RNA helicase DDX4 (EC 3.6.1.-) (DEAD box protein 4) (Vasa homolog) (Mvh)                                                                       | Ddx4 (Vasa)            | 17  | 25  | 44 | 56 |
| P61028 | Ras-related protein Rab-8B                                                                                                                                            | Rab8b                  | 17  | 59  | 4  | 5  |
| Q61316 | Heat shock 70 kDa protein 4 (Heat shock 70-related protein APG-2)                                                                                                     | Hspa4 (Apg2) (Hsp110)  | 379 | 792 | 42 | 52 |
| Q8BU30 | Isoleucyl-tRNA synthetase, cytoplasmic (EC 6.1.1.5) (Isoleucine--tRNA ligase) (IleRS) (IRS)                                                                           | Iars                   | 85  | 46  | 30 | 37 |
| O08648 | Mitogen-activated protein kinase kinase kinase 4 (EC 2.7.11.25) (MAPK/ERK kinase kinase 4) (MEK kinase 4) (MEKK 4)                                                    | Map3k4 (Mekk4)         | 37  | 16  | 19 | 23 |
| P49025 | Citron Rho-interacting kinase (CRIK) (EC 2.7.11.1) (Rho-interacting, serine/threonine-protein kinase 21)                                                              | Cit                    | 49  | 67  | 67 | 81 |
| Q60848 | Lymphocyte-specific helicase (EC 3.6.1.-) (Proliferation associated SNF2-like protein)                                                                                | Hells (Lsh) (Pasg)     | 37  | 35  | 10 | 12 |
| P80315 | T-complex protein 1 subunit delta (TCP-1-delta) (CCT-delta) (A45)                                                                                                     | Cct4 (Cctd)            | 61  | 59  | 15 | 18 |
| Q60575 | Kinesin-like protein KIF1B                                                                                                                                            | Kif1b                  | 45  | 95  | 30 | 36 |
| O08810 | 116 kDa U5 small nuclear ribonucleoprotein component (U5 snRNP-specific protein, 116 kDa) (U5-116 kDa) (Elongation factor Tu GTP-binding domain-containing protein 2) | Eftud2 (Snrp116)       | 80  | 68  | 21 | 25 |
| Q61771 | Kinesin-like protein KIF3B (Microtubule plus end-directed kinesin motor 3B)                                                                                           | Kif3b                  | 30  | 51  | 16 | 19 |



|        |                                                                                                                                                                                     |                       |      |      |     |     |
|--------|-------------------------------------------------------------------------------------------------------------------------------------------------------------------------------------|-----------------------|------|------|-----|-----|
| Q9R0K7 | Plasma membrane calcium-transporting ATPase 2 (PMCA2) (EC 3.6.3.8) (Plasma membrane calcium ATPase isoform 2) (Plasma membrane calcium pump isoform 2)                              | Atp2b2 (Pmca2)        | 32   | 27   | 70  | 83  |
| P80313 | T-complex protein 1 subunit eta (TCP-1-eta) (CCT-eta)                                                                                                                               | Cct7 (Ccth)           | 49   | 50   | 11  | 13  |
| Q8C3X4 | GTP-binding protein GUF1 homolog                                                                                                                                                    | Guf1                  | 311  | 506  | 412 | 483 |
| P49718 | DNA replication licensing factor MCM5 (CDC46 homolog) (P1-CDC46)                                                                                                                    | Mcm5 (Cdc46) (Mcmd5)  | 40   | 20   | 18  | 21  |
| P97820 | Mitogen-activated protein kinase kinase kinase 4 (EC 2.7.11.1) (MAPK/ERK kinase kinase kinase 4) (MEK kinase kinase 4) (MEKKK 4) (HPK/GCK-like kinase HGK) (Nck-interacting kinase) | Map4k4 (Nik)          | 65   | 54   | 15  | 17  |
| P26618 | Alpha-type platelet-derived growth factor receptor (EC 2.7.10.1) (PDGF-R-alpha) (CD140 antigen-like family member A) (CD antigen CD140a)                                            | Pdgfra                | 37   | 73   | 160 | 178 |
| P62631 | Elongation factor 1-alpha 2 (EF-1-alpha-2) (Elongation factor 1 A-2) (eEF1A-2) (Statin S1)                                                                                          | Eef1a2 (Eef1al) (Stn) | 1275 | 1549 | 258 | 285 |
| P49717 | DNA replication licensing factor MCM4 (CDC21 homolog) (P1-CDC21)                                                                                                                    | Mcm4 (Cdc21) (Mcmd4)  | 29   | 18   | 11  | 12  |
| Q3THS6 | S-adenosylmethionine synthetase isoform type 2 (AdoMet synthetase 2) (EC 2.5.1.6) (Methionine adenosyltransferase 2)                                                                | Mat2a                 | 26   | 42   | 11  | 12  |
| Q9QUI0 | Transforming protein RhoA                                                                                                                                                           | Rhoa (Arha) (Arha2)   | 117  | 231  | 11  | 12  |
| Q99KK9 | Probable histidyl-tRNA synthetase, mitochondrial (EC 6.1.1.21) (Histidine--tRNA ligase) (HisRS) (Histidine--tRNA ligase-like)                                                       | Hars2 (Harsl)         | 20   | 41   | 22  | 24  |

|        |                                                                                                                                                                                                                                       |                                    |      |      |     |     |
|--------|---------------------------------------------------------------------------------------------------------------------------------------------------------------------------------------------------------------------------------------|------------------------------------|------|------|-----|-----|
| P07901 | Heat shock protein HSP 90-alpha (HSP 86) (Tumor-specific transplantation 86 kDa antigen) (TSTA)                                                                                                                                       | Hsp90aa1 (Hsp86) (Hsp86-1) (Hspca) | 1529 | 2324 | 134 | 146 |
| P38647 | Stress-70 protein, mitochondrial (75 kDa glucose-regulated protein) (GRP 75) (Heat shock 70 kDa protein 9) (Peptide-binding protein 74) (PBP74) (P66 MOT) (Mortalin)                                                                  | Hspa9 (Grp75) (Hsp74) (Hspa9a)     | 33   | 33   | 12  | 13  |
| P10126 | Elongation factor 1-alpha 1 (EF-1-alpha-1) (Elongation factor 1 A-1) (eEF1A-1) (Elongation factor Tu) (EF-Tu)                                                                                                                         | Eef1a1 (Eef1a)                     | 2004 | 2344 | 305 | 330 |
| P08113 | Endoplasmic (Heat shock protein 90 kDa beta member 1) (94 kDa glucose-regulated protein) (GRP94) (ERP99) (Polymorphic tumor rejection antigen 1) (Tumor rejection antigen gp96)                                                       | Hsp90b1 (Tra-1) (Tra1)             | 221  | 298  | 25  | 27  |
| Q9Z104 | SWI/SNF-related matrix-associated actin-dependent regulator of chromatin subfamily E member 1-related (SMARCE1-related protein) (HMG box-containing protein 20B) (Structural DNA-binding protein BRAF35) (BRCA2-associated factor 35) | Hmg20b (Braf35) (Hmgx2) (Smarce1r) | 30   | 20   | 14  | 15  |
| P11984 | T-complex protein 1 subunit alpha A (TCP-1-alpha) (CCT-alpha) (Tailless complex polypeptide 1A) (TCP-1-A)                                                                                                                             | Cct1 (Ccta) (Tc1)                  | 29   | 66   | 14  | 15  |
| Q61820 | GTP-binding nuclear protein Ran, testis-specific isoform                                                                                                                                                                              | Rasl2-9                            | 564  | 570  | 23  | 24  |
| P12367 | cAMP-dependent protein kinase type II-alpha regulatory subunit                                                                                                                                                                        | Prkar2a                            | 33   | 23   | 5   | 5   |
| P30416 | FK506-binding protein 4 (EC 5.2.1.8) (Peptidyl-prolyl cis-trans isomerase) (PPlase) (Rotamase) (HSP-binding immunophilin) (HBI) (FKBP52 protein) (52 kDa FK506-binding protein) (FKBP59) (p59 protein)                                | Fkbp4                              | 40   | 62   | 8   | 8   |
| Q8C0N1 | Kinesin-like protein KIF2B                                                                                                                                                                                                            | Kif2b                              | 17   | 26   | 8   | 8   |

|        |                                                                                                                                                                                                              |                                                 |      |      |     |     |
|--------|--------------------------------------------------------------------------------------------------------------------------------------------------------------------------------------------------------------|-------------------------------------------------|------|------|-----|-----|
| Q80YV4 | Pantothenate kinase 4 (EC 2.7.1.33)<br>(Pantothenic acid kinase 4) (mPanK4)                                                                                                                                  | Pank4                                           | 23   | 28   | 13  | 13  |
| P25206 | DNA replication licensing factor MCM3 (DNA polymerase alpha holoenzyme-associated protein P1) (P1-MCM3)                                                                                                      | Mcm3 (Mcmd)<br>(Mcmd3)                          | 74   | 185  | 15  | 15  |
| Q8R4K2 | Interleukin-1 receptor-associated kinase 4 (IRAK-4) (EC 2.7.11.1)                                                                                                                                            | Irak4                                           | 32   | 47   | 22  | 22  |
| Q6P8J7 | Creatine kinase, sarcomeric mitochondrial (EC 2.7.3.2) (S-MtCK)                                                                                                                                              | Ckmt2                                           | 50   | 66   | 26  | 26  |
| P11499 | Heat shock protein HSP 90-beta (HSP 84) (Tumor-specific transplantation 84 kDa antigen) (TSTA)                                                                                                               | Hsp90ab1<br>(Hsp84)<br>(Hsp84-1)<br>(Hspcb)     | 2943 | 3523 | 208 | 205 |
| P58252 | Elongation factor 2 (EF-2)                                                                                                                                                                                   | Eef2                                            | 1630 | 1718 | 128 | 126 |
| O08638 | Myosin-11 (Myosin heavy chain 11) (Myosin heavy chain, smooth muscle isoform) (SMMHC)                                                                                                                        | Myh11                                           | 211  | 221  | 79  | 76  |
| Q9QXL1 | Kinesin-like protein KIF21B (Kinesin-like protein KIF6)                                                                                                                                                      | Kif21b (Kif6)                                   | 22   | 45   | 26  | 25  |
| Q8R4B8 | NACHT, LRR and PYD domains-containing protein 3 (Cold autoinflammatory syndrome 1 protein homolog) (Cryopyrin) (PYRIN-containing APAF1-like protein 1) (Mast cell maturation-associated-inducible protein 1) | Nlrp3 (Cias1)<br>(Mmig1)<br>(Nalp3)<br>(Pypaf1) | 30   | 20   | 24  | 23  |
| Q8BGQ7 | Alanyl-tRNA synthetase, cytoplasmic (EC 6.1.1.7) (Alanine--tRNA ligase) (AlaRS)                                                                                                                              | Aars                                            | 179  | 216  | 23  | 22  |
| Q91V92 | ATP-citrate synthase (EC 2.3.3.8) (ATP-citrate (pro-S)-lyase) (Citrate cleavage enzyme)                                                                                                                      | Acly                                            | 349  | 488  | 45  | 43  |
| Q61768 | Kinesin-1 heavy chain (Ubiquitous kinesin heavy chain) (UKHC) (Conventional kinesin heavy chain)                                                                                                             | Kif5b (Khcs)<br>(Kns1)                          | 102  | 303  | 43  | 41  |
| P62827 | GTP-binding nuclear protein Ran (GTPase Ran) (Ras-related nuclear protein) (Ras-like protein TC4)                                                                                                            | Ran (Rasl2-8)                                   | 756  | 656  | 38  | 36  |

|        |                                                                                                                                                                                                                     |                                    |      |      |     |     |
|--------|---------------------------------------------------------------------------------------------------------------------------------------------------------------------------------------------------------------------|------------------------------------|------|------|-----|-----|
| P30275 | Creatine kinase, ubiquitous mitochondrial (EC 2.7.3.2) (U-MtCK) (Acidic-type mitochondrial creatine kinase) (Mia-CK)                                                                                                | Ckmt1                              | 205  | 121  | 32  | 30  |
| Q04447 | Creatine kinase B-type (EC 2.7.3.2) (Creatine kinase B chain) (B-CK)                                                                                                                                                | Ckb (Ckbb)                         | 9079 | 7277 | 434 | 406 |
| P35969 | Vascular endothelial growth factor receptor 1 (VEGFR-1) (EC 2.7.10.1) (Tyrosine-protein kinase receptor FLT) (FLT-1) (Embryonic receptor kinase 2)                                                                  | Flt1 (Emrk2) (Flt)                 | 29   | 36   | 35  | 32  |
| Q01853 | Transitional endoplasmic reticulum ATPase (TER ATPase) (15S Mg(2+)-ATPase p97 subunit) (Valosin-containing protein) (VCP)                                                                                           | Vcp                                | 691  | 699  | 56  | 51  |
| Q8CGC7 | Bifunctional aminoacyl-tRNA synthetase [Includes: Glutamyl-tRNA synthetase (EC 6.1.1.17) (Glutamate--tRNA ligase); Prolyl-tRNA synthetase (EC 6.1.1.15) (Proline--tRNA ligase)]                                     | Eprs (Qprs)                        | 130  | 102  | 32  | 29  |
| Q8VDD5 | Myosin-9 (Myosin heavy chain 9) (Myosin heavy chain, non-muscle IIa) (Non-muscle myosin heavy chain IIa) (NMMHC II-a) (NMMHC-IIA) (Cellular myosin heavy chain, type A) (Non-muscle myosin heavy chain-A) (NMMHC-A) | Myh9                               | 780  | 839  | 127 | 115 |
| P07310 | Creatine kinase M-type (EC 2.7.3.2) (Creatine kinase M chain) (M-CK)                                                                                                                                                | Ckm (Ckmm)                         | 73   | 107  | 31  | 28  |
| Q99104 | Myosin-Va (Dilute myosin heavy chain, non-muscle)                                                                                                                                                                   | Myo5a (Dilute)                     | 28   | 34   | 35  | 31  |
| P33173 | Kinesin-like protein KIF1A (Axonal transporter of synaptic vesicles)                                                                                                                                                | Kif1a (Atsv) (Kif1)                | 45   | 108  | 25  | 22  |
| Q02053 | Ubiquitin-like modifier-activating enzyme 1 (Ubiquitin-activating enzyme E1) (Ubiquitin-like modifier-activating enzyme 1 X) (Ubiquitin-activating enzyme E1 X)                                                     | Uba1 (Sbx) (Ube1) (Ube1ax) (Ube1x) | 660  | 1086 | 63  | 55  |
| Q8VHE6 | Dynein heavy chain 5, axonemal (Axonemal beta dynein heavy chain 5) (Mdnah5) (Ciliary dynein heavy chain 5)                                                                                                         | Dnah5 (Dnahc5)                     | 47   | 44   | 83  | 72  |

|        |                                                                                                                                                                                                             |                           |     |     |    |    |
|--------|-------------------------------------------------------------------------------------------------------------------------------------------------------------------------------------------------------------|---------------------------|-----|-----|----|----|
| Q9Z1Q9 | Valyl-tRNA synthetase (EC 6.1.1.9) (Valine--tRNA ligase) (ValRS) (Protein G7a)                                                                                                                              | Vars (Bat6) (G7a) (Vars2) | 380 | 302 | 37 | 32 |
| Q921E2 | Ras-related protein Rab-31                                                                                                                                                                                  | Rab31                     | 18  | 29  | 7  | 6  |
| O88866 | Hormonally up-regulated neu tumor-associated kinase (EC 2.7.11.1) (Serine/threonine-protein kinase MAK-V)                                                                                                   | Hunk (Makv)               | 27  | 21  | 14 | 12 |
| Q9JM52 | Misshapen-like kinase 1 (EC 2.7.11.1) (Mitogen-activated protein kinase kinase kinase 6) (MAPK/ERK kinase kinase 6) (MEK kinase kinase 6) (MEKKK 6) (Misshapen/NIK-related kinase) (GCK family kinase MiNK) | Mink1 (Map4k6) (Mink)     | 18  | 54  | 13 | 11 |
| Q9CQN1 | Heat shock protein 75 kDa, mitochondrial (HSP 75) (Tumor necrosis factor type 1 receptor-associated protein) (TRAP-1) (TNFR-associated protein 1)                                                           | Trap1 (Hsp75)             | 197 | 335 | 13 | 11 |
| P20029 | 78 kDa glucose-regulated protein (GRP 78) (Heat shock 70 kDa protein 5) (Immunoglobulin heavy chain-binding protein) (BiP)                                                                                  | Hspa5 (Grp78)             | 262 | 312 | 25 | 21 |
| P46664 | Adenylosuccinate synthetase isozyme 2 (AMPSase 2) (AdSS 2) (EC 6.3.4.4) (Adenylosuccinate synthetase, non-muscle isozyme) (Adenylosuccinate synthetase, acidic isozyme) (IMP--aspartate ligase 2)           | Adss (Adss2)              | 36  | 66  | 12 | 10 |
| P11983 | T-complex protein 1 subunit alpha B (TCP-1-alpha) (CCT-alpha) (Tailless complex polypeptide 1B) (TCP-1-B)                                                                                                   | Cct1 (Ccta) (Tcp1)        | 29  | 66  | 18 | 15 |
| Q91XQ0 | Dynein heavy chain 8, axonemal (Axonemal beta dynein heavy chain 8) (Ciliary dynein heavy chain 8)                                                                                                          | Dnahc8                    | 47  | 51  | 77 | 64 |
| Q6URW6 | Myosin-14 (Myosin heavy chain 14) (Myosin heavy chain, non-muscle IIc) (Non-muscle myosin heavy chain IIc) (NMHC II-C)                                                                                      | Myh14                     | 60  | 48  | 53 | 44 |

|        |                                                                                                                                                                                                                                                                |                         |     |     |    |    |
|--------|----------------------------------------------------------------------------------------------------------------------------------------------------------------------------------------------------------------------------------------------------------------|-------------------------|-----|-----|----|----|
| Q8R429 | Sarcoplasmic/endoplasmic reticulum calcium ATPase 1 (SERCA1) (EC 3.6.3.8) (Calcium pump 1) (Calcium-transporting ATPase sarcoplasmic reticulum type, fast twitch skeletal muscle isoform) (SR Ca(2+)-ATPase 1) (Endoplasmic reticulum class 1/2 Ca(2+) ATPase) | Atp2a1                  | 25  | 17  | 17 | 14 |
| P80316 | T-complex protein 1 subunit epsilon (TCP-1-epsilon) (CCT-epsilon)                                                                                                                                                                                              | Cct5 (Ccte) (Kiaa0098)  | 239 | 102 | 17 | 14 |
| Q569Z5 | Probable ATP-dependent RNA helicase DDX46 (EC 3.6.1.-) (DEAD box protein 46)                                                                                                                                                                                   | Ddx46 (Kiaa0801)        | 25  | 17  | 21 | 17 |
| Q80ZW0 | Serine/threonine-protein kinase 35 (EC 2.7.11.1)                                                                                                                                                                                                               | Stk35                   | 14  | 50  | 21 | 17 |
| Q921J2 | GTP-binding protein Rheb (Ras homolog enriched in brain)                                                                                                                                                                                                       | Rheb                    | 21  | 44  | 31 | 25 |
| Q62407 | Striated muscle-specific serine/threonine protein kinase (EC 2.7.11.1) (Aortic preferentially expressed protein 1) (APEG-1)                                                                                                                                    | Speg (Apeg1) (Kiaa1297) | 26  | 20  | 31 | 25 |
| Q8VI47 | Canalicular multispecific organic anion transporter 1 (ATP-binding cassette sub-family C member 2)                                                                                                                                                             | Abcc2                   | 31  | 38  | 39 | 31 |
| Q8C196 | Carbamoyl-phosphate synthase [ammonia], mitochondrial (EC 6.3.4.16) (Carbamoyl-phosphate synthetase I) (CPSase I)                                                                                                                                              | Cps1                    | 22  | 25  | 19 | 15 |
| Q80UN9 | tRNA isopentenyltransferase, mitochondrial (IPTase) (EC 2.5.1.8) (Isopentenyl-diphosphate:tRNA isopentenyltransferase) (IPP transferase) (IPPT)                                                                                                                | Trit1 (Ipt)             | 31  | 24  | 19 | 15 |
| Q8CIQ7 | Dedicator of cytokinesis protein 3 (Modifier of cell adhesion) (Presenilin-binding protein) (PBP)                                                                                                                                                              | Dock3 (Moca)            | 80  | 56  | 33 | 26 |

|        |                                                                                                                                                                                                                            |                                        |     |     |     |     |
|--------|----------------------------------------------------------------------------------------------------------------------------------------------------------------------------------------------------------------------------|----------------------------------------|-----|-----|-----|-----|
| Q9JHU4 | Cytoplasmic dynein 1 heavy chain 1 (Cytoplasmic dynein heavy chain 1) (Dynein heavy chain, cytosolic)                                                                                                                      | Dync1h1 (Dhc1) (Dnch1) (Dnchc1) (Dyhc) | 822 | 395 | 157 | 123 |
| P31254 | Ubiquitin-like modifier-activating enzyme 1 Y (Ubiquitin-activating enzyme E1 Y) (Ubiquitin-activating enzyme E1)                                                                                                          | Ube1ay (Sby) (Ube1y) (Ube1y1)          | 161 | 77  | 22  | 17  |
| Q8CGK3 | Lon protease homolog, mitochondrial (EC 3.4.21.-) (Lon protease-like protein) (LONP) (Mitochondrial ATP-dependent protease Lon) (Serine protease 15)                                                                       | Lonp1 (Prss15)                         | 21  | 30  | 43  | 33  |
| Q8JZQ2 | AFG3-like protein 2 (EC 3.4.24.-)                                                                                                                                                                                          | Afg3l2                                 | 15  | 27  | 17  | 13  |
| Q569Z6 | Thyroid hormone receptor-associated protein 3 (Thyroid hormone receptor-associated protein complex 150 kDa component) (Trap150)                                                                                            | Thrap3 (Trap150)                       | 29  | 48  | 21  | 16  |
| P16627 | Heat shock 70 kDa protein 1L (Heat shock 70 kDa protein 1-like) (Heat shock 70 kDa-like protein 1) (Spermatid-specific heat shock protein 70)                                                                              | Hspa1l (Hsc70t)                        | 319 | 238 | 33  | 25  |
| O70228 | Probable phospholipid-transporting ATPase IIA (EC 3.6.3.1) (ATPase class II type 9A)                                                                                                                                       | Atp9a                                  | 31  | 29  | 37  | 28  |
| P56480 | ATP synthase subunit beta, mitochondrial (EC 3.6.3.14)                                                                                                                                                                     | Atp5b                                  | 31  | 50  | 8   | 6   |
| Q02956 | Protein kinase C zeta type (EC 2.7.11.13) (nPKC-zeta)                                                                                                                                                                      | Prkcz (PkcZ)                           | 29  | 15  | 8   | 6   |
| Q9DBP5 | UMP-CMP kinase (EC 2.7.4.14) (Cytidylate kinase) (Deoxycytidylate kinase) (Cytidine monophosphate kinase) (Uridine monophosphate kinase) (Uridine monophosphate/cytidine monophosphate kinase) (UMP/CMP kinase) (UMP/CMPK) | Cmpk1 (Cmk) (Cmpk) (Uck) (Umk) (Umpk)  | 107 | 93  | 12  | 9   |
| Q8K045 | Serine/threonine-protein kinase N3 (EC 2.7.11.13) (Protein kinase PKN-beta) (Protein-kinase C-related kinase 3)                                                                                                            | Pkn3 (Pknbeta)                         | 130 | 126 | 36  | 27  |

|        |                                                                                                                                      |                                    |      |      |     |     |
|--------|--------------------------------------------------------------------------------------------------------------------------------------|------------------------------------|------|------|-----|-----|
| P60710 | Actin, cytoplasmic 1 (Beta-actin)                                                                                                    | Actb                               | 5140 | 4496 | 282 | 208 |
| Q61656 | Probable ATP-dependent RNA helicase DDX5 (EC 3.6.1.-) (DEAD box protein 5) (RNA helicase p68) (DEAD box RNA helicase DEAD1) (mDEAD1) | Ddx5 (Tnz2)                        | 90   | 43   | 11  | 8   |
| Q61696 | Heat shock 70 kDa protein 1A (Heat shock 70 kDa protein 3) (HSP70.3) (Hsp68)                                                         | Hspa1a (Hsp70-3) (Hsp70A1)         | 266  | 236  | 33  | 24  |
| Q61699 | Heat shock protein 105 kDa (Heat shock-related 100 kDa protein E7I) (HSP-E7I) (Heat shock 110 kDa protein) (42 degrees C-HSP)        | Hsph1 (Hsp105) (Hsp110) (Kiaa0201) | 46   | 48   | 18  | 13  |
| Q8BMJ2 | Leucyl-tRNA synthetase, cytoplasmic (EC 6.1.1.4) (Leucine--tRNA ligase) (LeuRS)                                                      | Lars                               | 52   | 45   | 47  | 33  |
| P61294 | Ras-related protein Rab-6B                                                                                                           | Rab6b (D9Bwg0185e)                 | 18   | 53   | 10  | 7   |
| Q91YJ5 | Translation initiation factor IF-2, mitochondrial (IF-2Mt) (IF2(mt)) (IF-2(Mt))                                                      | Mtif2                              | 29   | 23   | 13  | 9   |
| Q9CWF2 | Tubulin beta-2B chain                                                                                                                | Tubb2b                             | 1435 | 825  | 86  | 59  |
| P99024 | Tubulin beta-5 chain                                                                                                                 | Tubb5                              | 1377 | 976  | 88  | 60  |
| Q6PHN9 | Ras-related protein Rab-35                                                                                                           | Rab35                              | 17   | 59   | 3   | 2   |
| P61164 | Alpha-centractin (Centractin) (Centrosome-associated actin homolog) (Actin-RPV) (ARP1)                                               | Actr1a (Ctrn1)                     | 247  | 124  | 27  | 18  |
| P68033 | Actin, alpha cardiac muscle 1 (Alpha-cardiac actin)                                                                                  | Actc1 (Actc)                       | 3948 | 2726 | 234 | 155 |
| P68372 | Tubulin beta-2C chain                                                                                                                | Tubb2c                             | 1300 | 891  | 78  | 51  |
| P42932 | T-complex protein 1 subunit theta (TCP-1-theta) (CCT-theta)                                                                          | Cct8 (Cctq)                        | 197  | 57   | 23  | 15  |
| P61161 | Actin-related protein 2 (Actin-like protein 2)                                                                                       | Actr2 (Arp2)                       | 247  | 124  | 28  | 18  |
| Q8CG48 | Structural maintenance of chromosomes protein 2 (Chromosome-associated protein E) (XCAP-E homolog) (FGF-inducible protein 16)        | Smc2 (Cape) (Fin16) (Smc2l1)       | 32   | 36   | 41  | 26  |



|        |                                                                                                                                                                                                                               |                                 |      |     |    |    |
|--------|-------------------------------------------------------------------------------------------------------------------------------------------------------------------------------------------------------------------------------|---------------------------------|------|-----|----|----|
| Q7TMM9 | Tubulin beta-2A chain                                                                                                                                                                                                         | Tubb2a<br>(Tubb2)               | 1422 | 775 | 83 | 52 |
| Q8C7H1 | Methylmalonic aciduria type A homolog, mitochondrial                                                                                                                                                                          | Mmaa                            | 31   | 37  | 16 | 10 |
| P17156 | Heat shock-related 70 kDa protein 2 (Heat shock protein 70.2)                                                                                                                                                                 | Hspa2<br>(Hcp70.2)<br>(Hsp70-2) | 964  | 544 | 60 | 37 |
| Q61879 | Myosin-10 (Myosin heavy chain 10) (Myosin heavy chain, non-muscle IIb) (Non-muscle myosin heavy chain IIb) (NMMHC II-b) (NMMHC-IIB) (Cellular myosin heavy chain, type B) (Non-muscle myosin heavy chain-B) (NMMHC-B)         | Myh10                           | 122  | 101 | 65 | 40 |
| Q9Z0P5 | Twinfilin-2 (Twinfilin-1-like protein) (A6-related protein) (mA6RP)                                                                                                                                                           | Twf2 (Ptk9I)                    | 29   | 32  | 10 | 6  |
| Q9QWK5 | Baculoviral IAP repeat-containing protein 1a (Neuronal apoptosis inhibitory protein 1)                                                                                                                                        | Naip1 (Birc1a)<br>(Naip)        | 21   | 28  | 20 | 12 |
| Q9EQZ6 | Rap guanine nucleotide exchange factor 4 (cAMP-regulated guanine nucleotide exchange factor II) (cAMP-GEFII) (Exchange factor directly activated by cAMP 2) (Epac 2) (cAMP-dependent Rap1 guanine-nucleotide exchange factor) | Rapgef4<br>(Cgef2)<br>(Epac2)   | 47   | 23  | 20 | 12 |
| P63038 | 60 kDa heat shock protein, mitochondrial (Heat shock protein 60) (HSP-60) (Hsp60) (60 kDa chaperonin) (Chaperonin 60) (CPN60) (Mitochondrial matrix protein P1) (HSP-65)                                                      | Hspd1<br>(Hsp60)                | 15   | 32  | 22 | 13 |
| P80317 | T-complex protein 1 subunit zeta (TCP-1-zeta) (CCT-zeta) (CCT-zeta-1)                                                                                                                                                         | Cct6a (Cct6)<br>(Cctz) (Cctz1)  | 160  | 52  | 22 | 13 |
| P10630 | Eukaryotic initiation factor 4A-II (eIF-4A-II) (eIF4A-II) (EC 3.6.1.-) (ATP-dependent RNA helicase eIF4A-2)                                                                                                                   | Eif4a2<br>(Ddx2b)               | 194  | 78  | 17 | 10 |

|                      |        |                                                                                                                                                                                                                                     |                                 |      |     |     |    |
|----------------------|--------|-------------------------------------------------------------------------------------------------------------------------------------------------------------------------------------------------------------------------------------|---------------------------------|------|-----|-----|----|
|                      | P09041 | Phosphoglycerate kinase 2 (EC 2.7.2.3)<br>(Phosphoglycerate kinase, testis specific)                                                                                                                                                | Pgk2 (Pkg-2)                    | 162  | 73  | 17  | 10 |
|                      | P63017 | Heat shock cognate 71 kDa protein (Heat shock 70 kDa protein 8)                                                                                                                                                                     | Hspa8<br>(Hsc70)<br>(Hsc73)     | 1719 | 959 | 119 | 70 |
|                      | P05532 | Mast/stem cell growth factor receptor (SCFR)<br>(EC 2.7.10.1) (Proto-oncogene tyrosine-protein kinase Kit) (c-kit) (CD antigen CD117)                                                                                               | Kit (SI)                        | 16   | 35  | 12  | 7  |
|                      | Q9QUK4 | Baculoviral IAP repeat-containing protein 1b<br>(Neuronal apoptosis inhibitory protein 2)                                                                                                                                           | Naip2 (Birc1b)<br>(Naip-rs6)    | 21   | 28  | 14  | 8  |
|                      | Q8K2I9 | F-box only protein 18 (EC 3.6.1.-) (F-box DNA helicase 1)                                                                                                                                                                           | Fbxo18 (Fbh1)<br>(Fbx18)        | 30   | 23  | 9   | 5  |
|                      | Q8BYH8 | Chromodomain-helicase-DNA-binding protein 9 (CHD-9) (EC 3.6.1.-) (ATP-dependent helicase CHD9) (Peroxisomal proliferator-activated receptor A-interacting complex 320 kDa protein) (PPAR-alpha-interacting complex protein 320 kDa) | Chd9<br>(Kiaa0308)<br>(Pric320) | 39   | 27  | 49  | 27 |
|                      | Q9WTU3 | Sodium channel protein type 8 subunit alpha<br>(Sodium channel protein type VIII subunit alpha) (Voltage-gated sodium channel subunit alpha Nav1.6)                                                                                 | Scn8a<br>(Nbna1)                | 28   | 19  | 20  | 11 |
|                      | Q9D6F9 | Tubulin beta-4 chain                                                                                                                                                                                                                | Tubb4                           | 888  | 493 | 58  | 31 |
|                      | Q61390 | T-complex protein 1 subunit zeta-2 (TCP-1-zeta-2) (CCT-zeta-2) (Cctz-2)                                                                                                                                                             | Cct6b                           | 55   | 52  | 15  | 8  |
|                      | Q922F4 | Tubulin beta-6 chain                                                                                                                                                                                                                | Tubb6                           | 583  | 382 | 40  | 21 |
|                      | Q9ERD7 | Tubulin beta-3 chain                                                                                                                                                                                                                | Tubb3                           | 780  | 383 | 52  | 27 |
|                      | Q80UE6 | Serine/threonine-protein kinase WNK4 (EC 2.7.11.1) (Protein kinase with no lysine 4) (Protein kinase, lysine-deficient 4)                                                                                                           | Wnk4<br>(Prkwnk4)               | 23   | 33  | 29  | 15 |
| nucleic acid binding | P97311 | DNA replication licensing factor MCM6 (Mis5 homolog)                                                                                                                                                                                | Mcm6<br>(Mcmd6)<br>(Mis5)       | 110  | 395 | 20  | 38 |

|        |                                                                                                                                                                                                                                          |                                                                                                                                                                               |     |      |    |    |
|--------|------------------------------------------------------------------------------------------------------------------------------------------------------------------------------------------------------------------------------------------|-------------------------------------------------------------------------------------------------------------------------------------------------------------------------------|-----|------|----|----|
| Q8R3C6 | Probable RNA-binding protein 19 (RNA-binding motif protein 19)                                                                                                                                                                           | Rbm19                                                                                                                                                                         | 26  | 32   | 11 | 20 |
| Q8BYC6 | Serine/threonine-protein kinase TAO3 (EC 2.7.11.1) (Thousand and one amino acid protein 3)                                                                                                                                               | Taok3                                                                                                                                                                         | 32  | 38   | 9  | 16 |
| Q9Z129 | ATP-dependent DNA helicase Q1 (EC 3.6.1.-) (DNA-dependent ATPase Q1)                                                                                                                                                                     | Recql (Recql1)                                                                                                                                                                | 17  | 27   | 13 | 22 |
| Q8CGP2 | Histone H2B type 1-P                                                                                                                                                                                                                     | Hist1h2bp                                                                                                                                                                     | 436 | 999  | 46 | 77 |
| P57776 | Elongation factor 1-delta (EF-1-delta)                                                                                                                                                                                                   | Eef1d                                                                                                                                                                         | 109 | 35   | 3  | 5  |
| P62960 | Nuclease-sensitive element-binding protein 1 (Y-box-binding protein 1) (Y-box transcription factor) (YB-1) (CCAAT-binding transcription factor I subunit A) (CBF-A) (Enhancer factor I subunit A) (EFI-A) (DNA-binding protein B) (DBPB) | Ybx1 (Msy-1) (Msy1) (Nsep1) (Yb1)                                                                                                                                             | 56  | 126  | 6  | 10 |
| P62806 | Histone H4                                                                                                                                                                                                                               | Hist1h4a;<br>Hist1h4b (H4-53); Hist1h4c (H4-12);<br>Hist1h4d;<br>Hist1h4f;<br>Hist1h4h;<br>Hist1h4i;<br>Hist1h4j;<br>Hist1h4k;<br>Hist1h4m;<br>Hist2h4a (Hist2h4);<br>Hist4h4 | 815 | 1617 | 47 | 78 |
| Q64475 | Histone H2B type 1-B (h2B-143)                                                                                                                                                                                                           | Hist1h2bb                                                                                                                                                                     | 436 | 999  | 46 | 75 |
| Q501J6 | Probable ATP-dependent RNA helicase DDX17 (EC 3.6.1.-) (DEAD box protein 17)                                                                                                                                                             | Ddx17                                                                                                                                                                         | 90  | 43   | 7  | 11 |
| Q6ZWX6 | Eukaryotic translation initiation factor 2 subunit 1 (Eukaryotic translation initiation factor 2 subunit alpha) (eIF-2-alpha) (EIF-2alpha) (EIF-2A)                                                                                      | Eif2s1 (Eif2a)                                                                                                                                                                | 27  | 177  | 7  | 11 |

|        |                                                                                                                                                                                                                                                       |                                  |     |     |    |    |
|--------|-------------------------------------------------------------------------------------------------------------------------------------------------------------------------------------------------------------------------------------------------------|----------------------------------|-----|-----|----|----|
| Q61990 | Poly(rC)-binding protein 2 (Alpha-CP2) (Putative heterogeneous nuclear ribonucleoprotein X) (hnRNP X) (CTBP) (CBP)                                                                                                                                    | Pcbp2 (Cbp) (HnrnpX) (Hnrpx)     | 29  | 194 | 7  | 11 |
| P62082 | 40S ribosomal protein S7                                                                                                                                                                                                                              | Rps7                             | 104 | 126 | 9  | 14 |
| P63158 | High mobility group protein B1 (High mobility group protein 1) (HMG-1)                                                                                                                                                                                | Hmgb1 (Hmg-1) (Hmg1)             | 153 | 405 | 25 | 38 |
| Q8K386 | Ras-related protein Rab-15                                                                                                                                                                                                                            | Rab15                            | 44  | 74  | 4  | 6  |
| O55142 | 60S ribosomal protein L35a                                                                                                                                                                                                                            | Rpl35a                           | 24  | 50  | 4  | 6  |
| P97868 | Retinoblastoma-binding protein 6 (p53-associated cellular protein of testis) (Proliferation potential-related protein) (Protein P2P-R)                                                                                                                | Rbbp6 (P2pr) (Pact)              | 21  | 29  | 24 | 35 |
| Q3THW5 | Histone H2A.V (H2A.F/Z)                                                                                                                                                                                                                               | H2afv (H2av)                     | 297 | 426 | 11 | 16 |
| P60335 | Poly(rC)-binding protein 1 (Alpha-CP1) (hnRNP-E1)                                                                                                                                                                                                     | Pcbp1                            | 56  | 350 | 9  | 13 |
| O70251 | Elongation factor 1-beta (EF-1-beta)                                                                                                                                                                                                                  | Eef1b (Eef1b2)                   | 39  | 102 | 7  | 10 |
| P12813 | Nuclear receptor subfamily 4 group A member 1 (Orphan nuclear receptor HMR) (Nuclear hormone receptor NUR/77) (N10 nuclear protein)                                                                                                                   | Nr4a1 (Gfrp) (Hmr) (N10) (Nur77) | 61  | 31  | 7  | 10 |
| P70696 | Histone H2B type 1-A (Histone H2B, testis) (Testis-specific histone H2B)                                                                                                                                                                              | Hist1h2ba (Th2b)                 | 146 | 378 | 37 | 51 |
| P27641 | ATP-dependent DNA helicase 2 subunit 2 (EC 3.6.1.-) (ATP-dependent DNA helicase II 80 kDa subunit) (Ku autoantigen protein p86 homolog) (Ku80) (CTC box-binding factor 85 kDa subunit) (CTCBF) (CTC85) (Nuclear factor IV) (DNA repair protein XRCC5) | Xrcc5 (G22p2)                    | 22  | 29  | 16 | 22 |
| Q61937 | Nucleophosmin (NPM) (Nucleolar phosphoprotein B23) (Numatrin) (Nucleolar protein NO38)                                                                                                                                                                | Npm1                             | 92  | 66  | 11 | 15 |
| P70338 | Zinc finger protein Gfi-1 (Growth factor independent protein 1)                                                                                                                                                                                       | Gfi1 (Gfi-1)                     | 45  | 39  | 17 | 23 |

|        |                                                                                                                                                                                                                                                                                        |                                  |     |     |    |    |
|--------|----------------------------------------------------------------------------------------------------------------------------------------------------------------------------------------------------------------------------------------------------------------------------------------|----------------------------------|-----|-----|----|----|
| Q61789 | Laminin subunit alpha-3 (Nicein subunit alpha)                                                                                                                                                                                                                                         | Lama3                            | 26  | 26  | 37 | 50 |
| Q9WTX2 | Interferon-inducible double stranded RNA-dependent protein kinase activator A (Protein kinase, interferon-inducible double stranded RNA-dependent activator) (Protein activator of the interferon-induced protein kinase) (PKR-associated protein X) (PKR-associating protein X) (RAX) | Prkra (Rax)                      | 28  | 39  | 9  | 12 |
| Q5SXJ3 | Fanconi anemia group J protein homolog (Protein FACJ) (EC 3.6.1.-) (ATP-dependent RNA helicase BRIP1) (BRCA1-interacting protein C-terminal helicase 1) (BRCA1-interacting protein 1) (BRCA1-associated C-terminal helicase 1)                                                         | Brip1 (Bach1) (Fancj)            | 25  | 18  | 13 | 17 |
| P63163 | Small nuclear ribonucleoprotein-associated protein N (snRNP-N) (Sm protein N) (Sm-N) (SmN) (Sm-D) (Tissue-specific-splicing protein)                                                                                                                                                   | Snrpn (Smn)                      | 38  | 17  | 7  | 9  |
| Q7TQ07 | DNA polymerase nu (EC 2.7.7.7)                                                                                                                                                                                                                                                         | Poln                             | 20  | 39  | 14 | 18 |
| Q07133 | Histone H1t (Testicular H1 histone)                                                                                                                                                                                                                                                    | Hist1h1t (H1ft) (H1t)            | 46  | 72  | 54 | 69 |
| Q61496 | Probable ATP-dependent RNA helicase DDX4 (EC 3.6.1.-) (DEAD box protein 4) (Vasa homolog) (Mvh)                                                                                                                                                                                        | Ddx4 (Vasa)                      | 17  | 25  | 44 | 56 |
| P27661 | Histone H2A.x (H2a/x)                                                                                                                                                                                                                                                                  | H2afx (H2a.x) (H2ax) (Hist5-2ax) | 301 | 426 | 15 | 19 |
| Q62093 | Splicing factor, arginine/serine-rich 2 (Splicing factor SC35) (SC-35) (Splicing component, 35 kDa) (Protein PR264) (Putative myelin regulatory factor 1) (MRF-1)                                                                                                                      | Sfrs2 (Pr264) (Sfrs10)           | 184 | 117 | 15 | 19 |

|        |                                                                                                                                                                          |                        |     |     |     |     |
|--------|--------------------------------------------------------------------------------------------------------------------------------------------------------------------------|------------------------|-----|-----|-----|-----|
| P28271 | Cytoplasmic aconitate hydratase (Aconitase) (EC 4.2.1.3) (Citrate hydro-lyase) (Iron-responsive element-binding protein 1) (IRE-BP 1) (Iron regulatory protein 1) (IRP1) | Aco1 (Ireb1) (Irebp)   | 77  | 122 | 147 | 184 |
| Q3UKC1 | Tax1-binding protein 1 homolog                                                                                                                                           | Tax1bp1                | 22  | 27  | 24  | 30  |
| Q811J3 | Iron-responsive element-binding protein 2 (IRE-BP 2) (Iron regulatory protein 2) (IRP2)                                                                                  | Ireb2 (Irp2)           | 69  | 119 | 142 | 176 |
| Q8BGD9 | Eukaryotic translation initiation factor 4B (eIF-4B)                                                                                                                     | Eif4b                  | 238 | 306 | 13  | 16  |
| Q8VII8 | Mineralocorticoid receptor (MR) (Nuclear receptor subfamily 3 group C member 2)                                                                                          | Nr3c2 (Mlr)            | 28  | 22  | 18  | 22  |
| Q6PDM2 | Splicing factor, arginine/serine-rich 1 (ASF/SF2)                                                                                                                        | Sfrs1                  | 24  | 91  | 5   | 6   |
| Q60848 | Lymphocyte-specific helicase (EC 3.6.1.-) (Proliferation associated SNF2-like protein)                                                                                   | Hells (Lsh) (Pasg)     | 37  | 35  | 10  | 12  |
| O08810 | 116 kDa U5 small nuclear ribonucleoprotein component (U5 snRNP-specific protein, 116 kDa) (U5-116 kDa) (Elongation factor Tu GTP-binding domain-containing protein 2)    | Eftud2 (Snrp116)       | 80  | 68  | 21  | 25  |
| P54103 | DnaJ homolog subfamily C member 2 (Zuotin-related factor 1) (Mouse Id associate 1) (MIDA1)                                                                               | Dnajc2 (Mida1) (Zrf1)  | 23  | 27  | 11  | 13  |
| Q8C3X4 | GTP-binding protein GUF1 homolog                                                                                                                                         | Guf1                   | 311 | 506 | 412 | 483 |
| Q6GSS7 | Histone H2A type 2-A (H2A.2) (H2a-614) (H2a-615)                                                                                                                         | Hist2h2aa1; Hist2h2aa2 | 505 | 763 | 18  | 21  |
| P49718 | DNA replication licensing factor MCM5 (CDC46 homolog) (P1-CDC46)                                                                                                         | Mcm5 (Cdc46) (Mcmd5)   | 40  | 20  | 18  | 21  |
| P48754 | Breast cancer type 1 susceptibility protein homolog                                                                                                                      | Brca1                  | 28  | 25  | 26  | 30  |
| Q9JKP5 | Muscleblind-like protein 1 (Triplet-expansion RNA-binding protein)                                                                                                       | Mbnl1 (Exp) (Mbnl)     | 45  | 63  | 244 | 281 |

|        |                                                                                                                                                                                                                                                                                                                    |                                   |      |      |     |     |
|--------|--------------------------------------------------------------------------------------------------------------------------------------------------------------------------------------------------------------------------------------------------------------------------------------------------------------------|-----------------------------------|------|------|-----|-----|
| Q9QWY8 | 130 kDa phosphatidylinositol 4,5-biphosphate-dependent ARF1 GTPase-activating protein (PIP2-dependent ARF1 GAP) (ADP-ribosylation factor-directed GTPase-activating protein 1) (ARF GTPase-activating protein 1) (Development and differentiation-enhancing factor 1) (Differentiation-enhancing factor 1) (DEF-1) | Ddef1 (Asap1) (Kiaa1249) (Shag1)  | 26   | 23   | 14  | 16  |
| P62270 | 40S ribosomal protein S18 (Ke-3) (Ke3)                                                                                                                                                                                                                                                                             | Rps18                             | 210  | 209  | 15  | 17  |
| P55200 | Histone-lysine N-methyltransferase HRX (EC 2.1.1.43) (Zinc finger protein HRX) (ALL-1)                                                                                                                                                                                                                             | Mll (All1) (Hrx) (Mll1)           | 67   | 26   | 39  | 44  |
| P62908 | 40S ribosomal protein S3                                                                                                                                                                                                                                                                                           | Rps3                              | 778  | 762  | 39  | 44  |
| Q921M3 | Splicing factor 3B subunit 3 (Spliceosome-associated protein 130) (SAP 130) (Pre-mRNA splicing factor SF3b 130 kDa subunit) (SF3b130)                                                                                                                                                                              | Sf3b3 (Kiaa0017)                  | 16   | 34   | 24  | 27  |
| P41230 | Histone demethylase JARID1C (EC 1.14.11.-) (Jumonji/ARID domain-containing protein 1C) (Protein SmcX) (Protein Xe169)                                                                                                                                                                                              | Jarid1c (Kiaa0234) (Smcx) (Xe169) | 34   | 32   | 26  | 29  |
| P62631 | Elongation factor 1-alpha 2 (EF-1-alpha-2) (Elongation factor 1 A-2) (eEF1A-2) (Statin S1)                                                                                                                                                                                                                         | Eef1a2 (Eef1a1) (Stn)             | 1275 | 1549 | 258 | 285 |
| Q9D8N0 | Elongation factor 1-gamma (EF-1-gamma) (eEF-1B gamma)                                                                                                                                                                                                                                                              | Eef1g                             | 31   | 85   | 11  | 12  |
| P49717 | DNA replication licensing factor MCM4 (CDC21 homolog) (P1-CDC21)                                                                                                                                                                                                                                                   | Mcm4 (Cdc21) (Mcmd4)              | 29   | 18   | 11  | 12  |
| P70298 | Homeobox protein cut-like 2 (Cut-like 2) (Homeobox protein Cux-2)                                                                                                                                                                                                                                                  | Cux2 (Cutl2)                      | 30   | 22   | 12  | 13  |
| P10126 | Elongation factor 1-alpha 1 (EF-1-alpha-1) (Elongation factor 1 A-1) (eEF1A-1) (Elongation factor Tu) (EF-Tu)                                                                                                                                                                                                      | Eef1a1 (Eef1a)                    | 2004 | 2344 | 305 | 330 |

|        |                                                                                                                                                                                                                                       |                                       |     |     |     |     |
|--------|---------------------------------------------------------------------------------------------------------------------------------------------------------------------------------------------------------------------------------------|---------------------------------------|-----|-----|-----|-----|
| P08113 | Endoplasmic reticulum chaperone (Heat shock protein 90 kDa beta member 1) (94 kDa glucose-regulated protein) (GRP94) (ERP99) (Polymorphic tumor rejection antigen 1) (Tumor rejection antigen gp96)                                   | Hsp90b1 (Tra1) (Tra1)                 | 221 | 298 | 25  | 27  |
| Q9Z104 | SWI/SNF-related matrix-associated actin-dependent regulator of chromatin subfamily E member 1-related (SMARCE1-related protein) (HMG box-containing protein 20B) (Structural DNA-binding protein BRAF35) (BRCA2-associated factor 35) | Hmg20b (Braf35) (Hmgx2) (Smarce1r)    | 30  | 20  | 14  | 15  |
| Q62504 | Msx2-interacting protein (SPEN homolog) (SMART/HDAC1-associated repressor protein)                                                                                                                                                    | Spen (Kiaa0929) (Mint) (Sharp)        | 27  | 18  | 72  | 75  |
| P62281 | 40S ribosomal protein S11                                                                                                                                                                                                             | Rps11                                 | 166 | 132 | 27  | 28  |
| Q9JM05 | E3 SUMO-protein ligase PIAS4 (Protein inhibitor of activated STAT protein 4) (Protein inhibitor of activated STAT protein gamma) (PIAS-gamma) (PIASy)                                                                                 | Pias4 (Piasg)                         | 26  | 29  | 162 | 165 |
| Q3TXZ1 | Zinc finger protein 575                                                                                                                                                                                                               | Znf575 (Zfp575)                       | 30  | 25  | 5   | 5   |
| Q8VCZ3 | THAP domain-containing protein 7                                                                                                                                                                                                      | Thap7                                 | 26  | 18  | 6   | 6   |
| Q9R190 | Metastasis-associated protein MTA2 (Metastasis-associated 1-like 1)                                                                                                                                                                   | Mta2 (Mta111)                         | 27  | 26  | 9   | 9   |
| Q99LX0 | Protein DJ-1 (Parkinson disease protein 7 homolog)                                                                                                                                                                                    | Park7                                 | 53  | 178 | 9   | 9   |
| Q6P5F9 | Exportin-1 (Exp1) (Chromosome region maintenance 1 protein homolog)                                                                                                                                                                   | Xpo1 (Crm1)                           | 19  | 43  | 9   | 9   |
| Q9DAI4 | Zinc finger and BTB domain-containing protein 43 (Zinc finger protein 297B)                                                                                                                                                           | Zbtb43 (Kiaa0414) (Zfp297b) (Znf297b) | 23  | 51  | 9   | 9   |
| P25206 | DNA replication licensing factor MCM3 (DNA polymerase alpha holoenzyme-associated protein P1) (P1-MCM3)                                                                                                                               | Mcm3 (Mcmd) (Mcmd3)                   | 74  | 185 | 15  | 15  |



|        |                                                                                                                                                                                             |                                   |      |      |     |     |
|--------|---------------------------------------------------------------------------------------------------------------------------------------------------------------------------------------------|-----------------------------------|------|------|-----|-----|
| P30681 | High mobility group protein B2 (High mobility group protein 2) (HMG-2)                                                                                                                      | Hmgb2 (Hmg2)                      | 94   | 222  | 24  | 24  |
| Q8K4E0 | Alstrom syndrome protein 1 homolog                                                                                                                                                          | Alms1 (Kiaa0328)                  | 29   | 30   | 86  | 86  |
| P58252 | Elongation factor 2 (EF-2)                                                                                                                                                                  | Eef2                              | 1630 | 1718 | 128 | 126 |
| Q91YE5 | Bromodomain adjacent to zinc finger domain protein 2A (Transcription termination factor I-interacting protein 5) (TTF-I-interacting protein 5) (Tip5)                                       | Baz2a (Tip5)                      | 36   | 15   | 56  | 55  |
| P23116 | Eukaryotic translation initiation factor 3 subunit A (eIF3a) (Eukaryotic translation initiation factor 3 subunit 10) (eIF-3-theta) (eIF3 p167) (eIF3 p180) (eIF3 p185) (p162) (Centrosomin) | Eif3a (Csma) (Eif3) (Eif3s10)     | 199  | 166  | 58  | 56  |
| Q8BGQ7 | Alanyl-tRNA synthetase, cytoplasmic (EC 6.1.1.7) (Alanine--tRNA ligase) (AlaRS)                                                                                                             | Aars                              | 179  | 216  | 23  | 22  |
| P07724 | Serum albumin                                                                                                                                                                               | Alb (Alb-1) (Alb1)                | 550  | 572  | 22  | 21  |
| Q8R1B4 | Eukaryotic translation initiation factor 3 subunit C (eIF3c) (Eukaryotic translation initiation factor 3 subunit 8) (eIF3 p110)                                                             | Eif3c (Eif3s8)                    | 34   | 63   | 22  | 21  |
| Q6ZPK0 | PHD finger protein 21A (BRAF35-HDAC complex protein BHC80) (mBHC80) (BHC80a)                                                                                                                | Phf21a (Bhc80) (Kiaa1696) (Pftf1) | 28   | 37   | 20  | 19  |
| P03966 | N-myc proto-oncogene protein                                                                                                                                                                | Mycn (Nmyc) (Nmyc1)               | 65   | 46   | 18  | 17  |
| Q8CGC6 | RNA-binding protein 28 (RNA-binding motif protein 28)                                                                                                                                       | Rbm28                             | 24   | 41   | 71  | 66  |
| Q7TMY8 | E3 ubiquitin-protein ligase HUWE1 (EC 6.3.2.-) (HECT, UBA and WWE domain-containing protein 1) (Upstream regulatory element-binding protein 1) (URE-binding protein 1) (URE-B1) (E3Histone) | Huwe1 (Kiaa0312) (Ureb1)          | 33   | 91   | 39  | 36  |

|        |                                                                                                                                                                        |                           |     |     |    |    |
|--------|------------------------------------------------------------------------------------------------------------------------------------------------------------------------|---------------------------|-----|-----|----|----|
| Q9QZH3 | Peptidyl-prolyl cis-trans isomerase E (PPIase E) (Rotamase E) (EC 5.2.1.8) (Cyclophilin E) (Cyclophilin-33)                                                            | Ppie (Cyp33)              | 28  | 35  | 10 | 9  |
| Q925Q8 | Dachshund homolog 2 (Dach2)                                                                                                                                            | Dach2                     | 22  | 30  | 9  | 8  |
| P43277 | Histone H1.3 (H1 VAR.4) (H1d)                                                                                                                                          | Hist1h1d (H1f3)           | 78  | 99  | 18 | 16 |
| Q9QXA7 | Tripartite motif-containing protein 44 (Protein DIPB) (Protein Mc7)                                                                                                    | Trim44 (Dipb)             | 28  | 23  | 18 | 16 |
| Q8BG95 | Protein phosphatase 1 regulatory subunit 12B (Myosin phosphatase-targeting subunit 2)                                                                                  | Ppp1r12b (Mypt2)          | 25  | 24  | 25 | 22 |
| Q924C1 | Exportin-5 (Exp5) (Ran-binding protein 21)                                                                                                                             | Xpo5 (Kiaa1291) (Ranbp21) | 20  | 62  | 15 | 13 |
| Q9JJK8 | Serine/threonine-protein kinase ATR (EC 2.7.11.1) (Ataxia telangiectasia and Rad3-related protein)                                                                     | Atr                       | 20  | 25  | 72 | 62 |
| P67984 | 60S ribosomal protein L22 (Heparin-binding protein HBp15)                                                                                                              | Rpl22                     | 59  | 48  | 7  | 6  |
| P35979 | 60S ribosomal protein L12                                                                                                                                              | Rpl12                     | 208 | 389 | 14 | 12 |
| Q6ZWN5 | 40S ribosomal protein S9                                                                                                                                               | Rps9                      | 459 | 248 | 47 | 40 |
| Q99PP7 | E3 ubiquitin-protein ligase TRIM33 (EC 6.3.2.-) (Tripartite motif-containing protein 33) (Transcription intermediary factor 1-gamma) (TIF1-gamma) (Ectodermin homolog) | Trim33 (Kiaa1113)         | 33  | 25  | 12 | 10 |
| P09405 | Nucleolin (Protein C23)                                                                                                                                                | Ncl (Nuc)                 | 775 | 872 | 78 | 65 |
| P42227 | Signal transducer and activator of transcription 3 (Acute-phase response factor)                                                                                       | Stat3 (Aprf)              | 16  | 28  | 33 | 27 |
| Q569Z5 | Probable ATP-dependent RNA helicase DDX46 (EC 3.6.1.-) (DEAD box protein 46)                                                                                           | Ddx46 (Kiaa0801)          | 25  | 17  | 21 | 17 |
| Q80UN9 | tRNA isopentenyltransferase, mitochondrial (IPTase) (EC 2.5.1.8) (Isopentenyl-diphosphate:tRNA isopentenyltransferase) (IPP transferase) (IPPT)                        | Trit1 (lpt)               | 31  | 24  | 19 | 15 |

|        |                                                                                                                                                      |                                      |     |     |    |    |
|--------|------------------------------------------------------------------------------------------------------------------------------------------------------|--------------------------------------|-----|-----|----|----|
| P62754 | 40S ribosomal protein S6 (Phosphoprotein NP33)                                                                                                       | Rps6                                 | 127 | 283 | 19 | 15 |
| Q8CGK3 | Lon protease homolog, mitochondrial (EC 3.4.21.-) (Lon protease-like protein) (LONP) (Mitochondrial ATP-dependent protease Lon) (Serine protease 15) | Lonp1 (Prss15)                       | 21  | 30  | 43 | 33 |
| P62702 | 40S ribosomal protein S4, X isoform                                                                                                                  | Rps4x (Rps4)                         | 402 | 304 | 30 | 23 |
| Q99MY8 | Probable histone-lysine N-methyltransferase ASH1L (EC 2.1.1.43) (Absent small and homeotic disks protein 1 homolog) (ASH1-like protein)              | Ash1l                                | 19  | 31  | 46 | 35 |
| P70670 | Nascent polypeptide-associated complex subunit alpha, muscle-specific form (Alpha-NAC, muscle-specific form)                                         | Naca (Gm1878)                        | 22  | 130 | 29 | 22 |
| P25233 | Necdin                                                                                                                                               | Ndn                                  | 30  | 23  | 16 | 12 |
| P62751 | 60S ribosomal protein L23a                                                                                                                           | Rpl23a                               | 75  | 49  | 16 | 12 |
| Q6P3Y5 | Zinc finger protein 280C (Suppressor of hairy wing homolog 3)                                                                                        | Znf280c (Kiaa1584) (Suhw3) (Zfp280c) | 87  | 142 | 43 | 32 |
| Q4VGL6 | Roquin (RING finger and C3H zinc finger protein 1) (Protein Sanroque)                                                                                | Rc3h1 (Gm551) (Kiaa2025)             | 54  | 54  | 23 | 17 |
| P58681 | Toll-like receptor 7                                                                                                                                 | Tlr7                                 | 27  | 33  | 23 | 17 |
| P62264 | 40S ribosomal protein S14                                                                                                                            | Rps14                                | 163 | 166 | 15 | 11 |
| P25444 | 40S ribosomal protein S2 (S4) (LLRep3 protein)                                                                                                       | Rps2 (Llrep3) (Rps4)                 | 217 | 50  | 26 | 19 |
| Q61656 | Probable ATP-dependent RNA helicase DDX5 (EC 3.6.1.-) (DEAD box protein 5) (RNA helicase p68) (DEAD box RNA helicase DEAD1) (mDEAD1)                 | Ddx5 (Tnz2)                          | 90  | 43  | 11 | 8  |
| P14148 | 60S ribosomal protein L7                                                                                                                             | Rpl7                                 | 145 | 52  | 14 | 10 |
| Q03172 | Zinc finger protein 40 (Transcription factor alphaA-CRYBP1) (Alpha A-crystallin-binding protein I) (Alpha A-CRYBP1)                                  | Hivep1 (Cryabp1) (Znf40)             | 25  | 24  | 21 | 15 |
| P51410 | 60S ribosomal protein L9                                                                                                                             | Rpl9                                 | 187 | 212 | 17 | 12 |

|        |                                                                                                                                                                                                                                 |                                          |     |     |    |    |
|--------|---------------------------------------------------------------------------------------------------------------------------------------------------------------------------------------------------------------------------------|------------------------------------------|-----|-----|----|----|
| Q91YJ5 | Translation initiation factor IF-2, mitochondrial (IF-2Mt) (IF2(mt)) (IF-2(Mt))                                                                                                                                                 | Mtif2                                    | 29  | 23  | 13 | 9  |
| Q64707 | U2 small nuclear ribonucleoprotein auxiliary factor 35 kDa subunit-related protein 1 (U2(RNU2) small nuclear RNA auxiliary factor 1-like 1) (CCCH type zinc finger, RNA-binding motif and serine/arginine rich protein 1) (SP2) | Zrsr1 (Sp2) (Sp2-7) (U2af1rs1) (U2af111) | 34  | 22  | 13 | 9  |
| Q52KI8 | Serine/arginine repetitive matrix protein 1 (Plenty-of-prolines 101)                                                                                                                                                            | Srrm1 (Pop101)                           | 22  | 73  | 29 | 20 |
| Q99PV0 | Pre-mRNA-processing-splicing factor 8 (Splicing factor Prp8)                                                                                                                                                                    | Prpf8 (Prp8)                             | 28  | 29  | 51 | 35 |
| P43275 | Histone H1.1 (H1 VAR.3) (H1a)                                                                                                                                                                                                   | Hist1h1a (H1f1)                          | 28  | 90  | 9  | 6  |
| P61979 | Heterogeneous nuclear ribonucleoprotein K (hnRNP K)                                                                                                                                                                             | Hnrnpk (Hnrpk)                           | 225 | 46  | 18 | 12 |
| Q9CXW4 | 60S ribosomal protein L11                                                                                                                                                                                                       | Rpl11                                    | 72  | 79  | 11 | 7  |
| Q9QZ09 | Putative homeodomain transcription factor 1                                                                                                                                                                                     | Phtf1 (Phtf)                             | 29  | 24  | 8  | 5  |
| Q80U87 | Ubiquitin carboxyl-terminal hydrolase 8 (EC 3.1.2.15) (Ubiquitin thioesterase 8) (Ubiquitin-specific-processing protease 8) (Deubiquitinating enzyme 8) (mUBPy)                                                                 | Usp8 (Kiaa0055) (Ubpy)                   | 29  | 23  | 24 | 15 |
| P84099 | 60S ribosomal protein L19                                                                                                                                                                                                       | Rpl19                                    | 39  | 47  | 13 | 8  |
| P62301 | 40S ribosomal protein S13                                                                                                                                                                                                       | Rps13                                    | 77  | 100 | 23 | 14 |
| O88291 | Zinc finger protein 326 (Zinc finger protein-associated with nuclear matrix of 75 kDa)                                                                                                                                          | Znf326 (Zan75) (Zfp326)                  | 41  | 55  | 5  | 3  |
| Q6NZJ6 | Eukaryotic translation initiation factor 4 gamma 1 (eIF-4-gamma 1) (eIF-4G 1) (eIF-4G1)                                                                                                                                         | Eif4g1                                   | 47  | 113 | 30 | 18 |
| P10630 | Eukaryotic initiation factor 4A-II (eIF-4A-II) (eIF4A-II) (EC 3.6.1.-) (ATP-dependent RNA helicase eIF4A-2)                                                                                                                     | Eif4a2 (Ddx2b)                           | 194 | 78  | 17 | 10 |
| P41105 | 60S ribosomal protein L28                                                                                                                                                                                                       | Rpl28                                    | 49  | 41  | 19 | 11 |

|                           |        |                                                                                                                                                                                                                                     |                                |     |     |    |    |
|---------------------------|--------|-------------------------------------------------------------------------------------------------------------------------------------------------------------------------------------------------------------------------------------|--------------------------------|-----|-----|----|----|
|                           | P53762 | Aryl hydrocarbon receptor nuclear translocator (ARNT protein) (Dioxin receptor, nuclear translocator) (Hypoxia-inducible factor 1 beta) (HIF-1 beta)                                                                                | Arnt                           | 25  | 22  | 7  | 4  |
|                           | Q9R1X4 | Protein timeless homolog (mTim)                                                                                                                                                                                                     | Timeless (Tim1) (Timeless1)    | 22  | 25  | 16 | 9  |
|                           | Q8K2I9 | F-box only protein 18 (EC 3.6.1.-) (F-box DNA helicase 1)                                                                                                                                                                           | Fbxo18 (Fbh1) (Fbx18)          | 30  | 23  | 9  | 5  |
|                           | P63073 | Eukaryotic translation initiation factor 4E (eIF-4E) (eIF4E) (mRNA cap-binding protein) (eIF-4F 25 kDa subunit)                                                                                                                     | Eif4e                          | 110 | 25  | 9  | 5  |
|                           | Q8BYH8 | Chromodomain-helicase-DNA-binding protein 9 (CHD-9) (EC 3.6.1.-) (ATP-dependent helicase CHD9) (Peroxisomal proliferator-activated receptor A-interacting complex 320 kDa protein) (PPAR-alpha-interacting complex protein 320 kDa) | Chd9 (Kiaa0308) (Pric320)      | 39  | 27  | 49 | 27 |
|                           | P17918 | Proliferating cell nuclear antigen (PCNA) (Cyclin)                                                                                                                                                                                  | Pcna                           | 273 | 207 | 20 | 11 |
|                           | Q9WUJ8 | Origin recognition complex subunit 6                                                                                                                                                                                                | Orc6l (Orc6)                   | 59  | 37  | 13 | 7  |
|                           | P11103 | Poly [ADP-ribose] polymerase 1 (PARP-1) (EC 2.4.2.30) (ADPRT) (NAD(+) ADP-ribosyltransferase 1) (Poly[ADP-ribose] synthetase 1) (msPARP)                                                                                            | Parp1 (Adprp) (Adprt) (Adprt1) | 21  | 26  | 17 | 9  |
| purine nucleotide binding | P97311 | DNA replication licensing factor MCM6 (Mis5 homolog)                                                                                                                                                                                | Mcm6 (Mcmd6) (Mis5)            | 110 | 395 | 20 | 38 |
|                           | O88705 | Potassium/sodium hyperpolarization-activated cyclic nucleotide-gated channel 3 (Hyperpolarization-activated cation channel 3) (HAC-3)                                                                                               | Hcn3 (Hac3)                    | 75  | 67  | 8  | 15 |
|                           | Q62159 | Rho-related GTP-binding protein RhoC (Silica-induced gene 61 protein) (SIG-61)                                                                                                                                                      | Rhoc (Arhc)                    | 33  | 173 | 5  | 9  |

|        |                                                                                                                                                                          |                     |     |     |    |    |
|--------|--------------------------------------------------------------------------------------------------------------------------------------------------------------------------|---------------------|-----|-----|----|----|
| Q8BYC6 | Serine/threonine-protein kinase TAO3 (EC 2.7.11.1) (Thousand and one amino acid protein 3)                                                                               | Taok3               | 32  | 38  | 9  | 16 |
| Q9R117 | Non-receptor tyrosine-protein kinase TYK2 (EC 2.7.10.2)                                                                                                                  | Tyk2                | 27  | 30  | 15 | 26 |
| Q8R1S0 | Ubiquinone biosynthesis monooxygenase COQ6 (EC 1.14.13.-)                                                                                                                | Coq6                | 42  | 92  | 10 | 17 |
| Q9Z129 | ATP-dependent DNA helicase Q1 (EC 3.6.1.-) (DNA-dependent ATPase Q1)                                                                                                     | Recql (Recql1)      | 17  | 27  | 13 | 22 |
| P15532 | Nucleoside diphosphate kinase A (NDP kinase A) (NDK A) (EC 2.7.4.6) (Tumor metastatic process-associated protein) (Metastasis inhibition factor NM23) (NDPK-A) (nm23-M1) | Nme1 (Nm23)         | 150 | 261 | 8  | 13 |
| Q501J6 | Probable ATP-dependent RNA helicase DDX17 (EC 3.6.1.-) (DEAD box protein 17)                                                                                             | Ddx17               | 90  | 43  | 7  | 11 |
| P63001 | Ras-related C3 botulinum toxin substrate 1 (p21-Rac1)                                                                                                                    | Rac1                | 31  | 99  | 7  | 11 |
| Q9Z1S0 | Mitotic checkpoint serine/threonine-protein kinase BUB1 beta (EC 2.7.11.1) (MAD3/BUB1-related protein kinase) (Mitotic checkpoint kinase MAD3L)                          | Bub1b (Mad3l)       | 20  | 41  | 15 | 23 |
| Q8K386 | Ras-related protein Rab-15                                                                                                                                               | Rab15               | 44  | 74  | 4  | 6  |
| P83741 | Serine/threonine-protein kinase WNK1 (EC 2.7.11.1) (Protein kinase with no lysine 1) (Protein kinase, lysine-deficient 1)                                                | Wnk1 (Prkwnk1)      | 56  | 36  | 18 | 27 |
| P35761 | Dual specificity protein kinase TTK (ESK) (PYT) (EC 2.7.12.1)                                                                                                            | Ttk (Esk)           | 14  | 34  | 9  | 13 |
| Q00342 | FL cytokine receptor (EC 2.7.10.1) (Tyrosine-protein kinase receptor flk-2) (Fetal liver kinase 2) (Tyrosine-protein kinase FLT3) (CD antigen CD135)                     | Flt3 (Flk-2) (Flt3) | 17  | 34  | 7  | 10 |
| Q9WVP9 | Interferon-induced GTP-binding protein Mx2 (Myxovirus resistance protein 2)                                                                                              | Mx2                 | 32  | 22  | 14 | 20 |

|        |                                                                                                                                                                                                                                                       |                                |      |      |    |    |
|--------|-------------------------------------------------------------------------------------------------------------------------------------------------------------------------------------------------------------------------------------------------------|--------------------------------|------|------|----|----|
| Q9Z1F9 | SUMO-activating enzyme subunit 2 (EC 6.3.2.-) (Ubiquitin-like 1-activating enzyme E1B) (Anthracycline-associated resistance ARX)                                                                                                                      | Uba2 (Sae2) (Uble1b)           | 62   | 77   | 10 | 14 |
| P05214 | Tubulin alpha-3 chain (Tubulin alpha-3/alpha-7 chain) (Alpha-tubulin 3/7) (Alpha-tubulin isotype M-alpha-3/7)                                                                                                                                         | Tuba3a (Tuba3); Tuba3b (Tuba7) | 1112 | 1288 | 61 | 84 |
| P17047 | Lysosome-associated membrane glycoprotein 2 (LAMP-2) (Lysosomal membrane glycoprotein type B) (LGP-B) (CD107 antigen-like family member B) (CD antigen CD107b)                                                                                        | Lamp2 (Lamp-2)                 | 26   | 29   | 8  | 11 |
| P27641 | ATP-dependent DNA helicase 2 subunit 2 (EC 3.6.1.-) (ATP-dependent DNA helicase II 80 kDa subunit) (Ku autoantigen protein p86 homolog) (Ku80) (CTC box-binding factor 85 kDa subunit) (CTCBF) (CTC85) (Nuclear factor IV) (DNA repair protein XRCC5) | Xrcc5 (G22p2)                  | 22   | 29   | 16 | 22 |
| P70296 | Phosphatidylethanolamine-binding protein 1 (PEBP-1) (HCNPPp) [Cleaved into: Hippocampal cholinergic neurostimulating peptide (HCNP)]                                                                                                                  | Pebp1 (Pbp) (Pebp)             | 532  | 730  | 25 | 33 |
| Q5SXJ3 | Fanconi anemia group J protein homolog (Protein FACJ) (EC 3.6.1.-) (ATP-dependent RNA helicase BRIP1) (BRCA1-interacting protein C-terminal helicase 1) (BRCA1-interacting protein 1) (BRCA1-associated C-terminal helicase 1)                        | Brip1 (Bach1) (Fancj)          | 25   | 18   | 13 | 17 |
| Q61846 | Maternal embryonic leucine zipper kinase (EC 2.7.11.1) (Protein kinase PK38) (mPK38)                                                                                                                                                                  | Melk (Kiaa0175) (Pk38)         | 28   | 32   | 10 | 13 |
| P63321 | Ras-related protein Ral-A                                                                                                                                                                                                                             | Rala (Ral) (Rala)              | 25   | 22   | 30 | 39 |

|        |                                                                                                                                                                       |                       |     |     |     |     |
|--------|-----------------------------------------------------------------------------------------------------------------------------------------------------------------------|-----------------------|-----|-----|-----|-----|
| Q61496 | Probable ATP-dependent RNA helicase DDX4 (EC 3.6.1.-) (DEAD box protein 4) (Vasa homolog) (Mvh)                                                                       | Ddx4 (Vasa)           | 17  | 25  | 44  | 56  |
| P61028 | Ras-related protein Rab-8B                                                                                                                                            | Rab8b                 | 17  | 59  | 4   | 5   |
| Q61316 | Heat shock 70 kDa protein 4 (Heat shock 70-related protein APG-2)                                                                                                     | Hspa4 (Apg2) (Hsp110) | 379 | 792 | 42  | 52  |
| Q8BU30 | Isoleucyl-tRNA synthetase, cytoplasmic (EC 6.1.1.5) (Isoleucine--tRNA ligase) (IleRS) (IRS)                                                                           | Iars                  | 85  | 46  | 30  | 37  |
| O08648 | Mitogen-activated protein kinase kinase kinase 4 (EC 2.7.11.25) (MAPK/ERK kinase kinase 4) (MEK kinase 4) (MEKK 4)                                                    | Map3k4 (Mekk4)        | 37  | 16  | 19  | 23  |
| P49025 | Citron Rho-interacting kinase (CRIK) (EC 2.7.11.1) (Rho-interacting, serine/threonine-protein kinase 21)                                                              | Cit                   | 49  | 67  | 67  | 81  |
| Q60848 | Lymphocyte-specific helicase (EC 3.6.1.-) (Proliferation associated SNF2-like protein)                                                                                | Hells (Lsh) (Pasg)    | 37  | 35  | 10  | 12  |
| P80315 | T-complex protein 1 subunit delta (TCP-1-delta) (CCT-delta) (A45)                                                                                                     | Cct4 (Cctd)           | 61  | 59  | 15  | 18  |
| Q60575 | Kinesin-like protein KIF1B                                                                                                                                            | Kif1b                 | 45  | 95  | 30  | 36  |
| O08810 | 116 kDa U5 small nuclear ribonucleoprotein component (U5 snRNP-specific protein, 116 kDa) (U5-116 kDa) (Elongation factor Tu GTP-binding domain-containing protein 2) | Eftud2 (Snrp116)      | 80  | 68  | 21  | 25  |
| Q61771 | Kinesin-like protein KIF3B (Microtubule plus end-directed kinesin motor 3B)                                                                                           | Kif3b                 | 30  | 51  | 16  | 19  |
| Q9R0K7 | Plasma membrane calcium-transporting ATPase 2 (PMCA2) (EC 3.6.3.8) (Plasma membrane calcium ATPase isoform 2) (Plasma membrane calcium pump isoform 2)                | Atp2b2 (Pmca2)        | 32  | 27  | 70  | 83  |
| P80313 | T-complex protein 1 subunit eta (TCP-1-eta) (CCT-eta)                                                                                                                 | Cct7 (Ccth)           | 49  | 50  | 11  | 13  |
| Q8C3X4 | GTP-binding protein GUF1 homolog                                                                                                                                      | Guf1                  | 311 | 506 | 412 | 483 |



|        |                                                                                                                                                                              |                                    |      |      |     |     |
|--------|------------------------------------------------------------------------------------------------------------------------------------------------------------------------------|------------------------------------|------|------|-----|-----|
| P49718 | DNA replication licensing factor MCM5 (CDC46 homolog) (P1-CDC46)                                                                                                             | Mcm5 (Cdc46) (Mcmd5)               | 40   | 20   | 18  | 21  |
| P97820 | Mitogen-activated protein kinase kinase kinase 4 (EC 2.7.11.1) (MAPK/ERK kinase kinase 4) (MEK kinase kinase 4) (MEKKK 4) (HPK/GCK-like kinase HGK) (Nck-interacting kinase) | Map4k4 (Nik)                       | 65   | 54   | 15  | 17  |
| P26618 | Alpha-type platelet-derived growth factor receptor (EC 2.7.10.1) (PDGF-R-alpha) (CD140 antigen-like family member A) (CD antigen CD140a)                                     | Pdgfra                             | 37   | 73   | 160 | 178 |
| P62631 | Elongation factor 1-alpha 2 (EF-1-alpha-2) (Elongation factor 1 A-2) (eEF1A-2) (Statin S1)                                                                                   | Eef1a2 (Eef1a1) (Str)              | 1275 | 1549 | 258 | 285 |
| P49717 | DNA replication licensing factor MCM4 (CDC21 homolog) (P1-CDC21)                                                                                                             | Mcm4 (Cdc21) (Mcmd4)               | 29   | 18   | 11  | 12  |
| Q3THS6 | S-adenosylmethionine synthetase isoform type 2 (AdoMet synthetase 2) (EC 2.5.1.6) (Methionine adenosyltransferase 2)                                                         | Mat2a                              | 26   | 42   | 11  | 12  |
| Q9QUI0 | Transforming protein RhoA                                                                                                                                                    | Rhoa (Arha) (Arha2)                | 117  | 231  | 11  | 12  |
| Q99KK9 | Probable histidyl-tRNA synthetase, mitochondrial (EC 6.1.1.21) (Histidine--tRNA ligase) (HisRS) (Histidine--tRNA ligase-like)                                                | Hars2 (Hars1)                      | 20   | 41   | 22  | 24  |
| P07901 | Heat shock protein HSP 90-alpha (HSP 86) (Tumor-specific transplantation 86 kDa antigen) (TSTA)                                                                              | Hsp90aa1 (Hsp86) (Hsp86-1) (Hspca) | 1529 | 2324 | 134 | 146 |
| P38647 | Stress-70 protein, mitochondrial (75 kDa glucose-regulated protein) (GRP 75) (Heat shock 70 kDa protein 9) (Peptide-binding protein 74) (PBP74) (P66 MOT) (Mortalin)         | Hspa9 (Grp75) (Hsp74) (Hspa9a)     | 33   | 33   | 12  | 13  |

|        |                                                                                                                                                                                                                                                        |                                             |      |      |     |     |
|--------|--------------------------------------------------------------------------------------------------------------------------------------------------------------------------------------------------------------------------------------------------------|---------------------------------------------|------|------|-----|-----|
| P10126 | Elongation factor 1-alpha 1 (EF-1-alpha-1)<br>(Elongation factor 1 A-1) (eEF1A-1)<br>(Elongation factor Tu) (EF-Tu)                                                                                                                                    | Eef1a1<br>(Eef1a)                           | 2004 | 2344 | 305 | 330 |
| P08113 | Endoplasmic (Heat shock protein 90 kDa beta<br>member 1) (94 kDa glucose-regulated protein)<br>(GRP94) (ERP99) (Polymorphic tumor<br>rejection antigen 1) (Tumor rejection antigen<br>gp96)                                                            | Hsp90b1 (Tra-<br>1) (Tra1)                  | 221  | 298  | 25  | 27  |
| Q9Z104 | SWI/SNF-related matrix-associated actin-<br>dependent regulator of chromatin subfamily E<br>member 1-related (SMARCE1-related protein)<br>(HMG box-containing protein 20B) (Structural<br>DNA-binding protein BRAF35) (BRCA2-<br>associated factor 35) | Hmg20b<br>(Braf35)<br>(Hmgx2)<br>(Smarce1r) | 30   | 20   | 14  | 15  |
| P11984 | T-complex protein 1 subunit alpha A (TCP-1-<br>alpha) (CCT-alpha) (Tailless complex<br>polypeptide 1A) (TCP-1-A)                                                                                                                                       | Cct1 (Ccta)<br>(Tcp1)                       | 29   | 66   | 14  | 15  |
| Q3TY86 | Apoptosis-inducing factor 3 (EC 1.-.-.-)<br>(Apoptosis-inducing factor-like protein)                                                                                                                                                                   | Aifm3 (Aifl)                                | 42   | 26   | 28  | 30  |
| Q61820 | GTP-binding nuclear protein Ran, testis-<br>specific isoform                                                                                                                                                                                           | Rasl2-9                                     | 564  | 570  | 23  | 24  |
| P12367 | cAMP-dependent protein kinase type II-alpha<br>regulatory subunit                                                                                                                                                                                      | Prkar2a                                     | 33   | 23   | 5   | 5   |
| P30416 | FK506-binding protein 4 (EC 5.2.1.8) (Peptidyl-<br>prolyl cis-trans isomerase) (PPIase)<br>(Rotamase) (HSP-binding immunophilin) (HBI)<br>(FKBP52 protein) (52 kDa FK506-binding<br>protein) (FKBP59) (p59 protein)                                    | Fkbp4                                       | 40   | 62   | 8   | 8   |
| Q8C0N1 | Kinesin-like protein KIF2B                                                                                                                                                                                                                             | Kif2b                                       | 17   | 26   | 8   | 8   |
| Q80YV4 | Pantothenate kinase 4 (EC 2.7.1.33)<br>(Pantothenic acid kinase 4) (mPanK4)                                                                                                                                                                            | Pank4                                       | 23   | 28   | 13  | 13  |
| P25206 | DNA replication licensing factor MCM3 (DNA<br>polymerase alpha holoenzyme-associated<br>protein P1) (P1-MCM3)                                                                                                                                          | Mcm3 (Mcmd)<br>(Mcmd3)                      | 74   | 185  | 15  | 15  |

|        |                                                                                                                                                                                                              |                                        |      |      |     |     |
|--------|--------------------------------------------------------------------------------------------------------------------------------------------------------------------------------------------------------------|----------------------------------------|------|------|-----|-----|
| Q8R4K2 | Interleukin-1 receptor-associated kinase 4 (IRAK-4) (EC 2.7.11.1)                                                                                                                                            | Irak4                                  | 32   | 47   | 22  | 22  |
| Q6P8J7 | Creatine kinase, sarcomeric mitochondrial (EC 2.7.3.2) (S-MtCK)                                                                                                                                              | Ckmt2                                  | 50   | 66   | 26  | 26  |
| P11499 | Heat shock protein HSP 90-beta (HSP 84) (Tumor-specific transplantation 84 kDa antigen) (TSTA)                                                                                                               | Hsp90ab1 (Hsp84) (Hsp84-1) (Hspcb)     | 2943 | 3523 | 208 | 205 |
| P58252 | Elongation factor 2 (EF-2)                                                                                                                                                                                   | Eef2                                   | 1630 | 1718 | 128 | 126 |
| O08638 | Myosin-11 (Myosin heavy chain 11) (Myosin heavy chain, smooth muscle isoform) (SMMHC)                                                                                                                        | Myh11                                  | 211  | 221  | 79  | 76  |
| Q9QXL1 | Kinesin-like protein KIF21B (Kinesin-like protein KIF6)                                                                                                                                                      | Kif21b (Kif6)                          | 22   | 45   | 26  | 25  |
| Q8R4B8 | NACHT, LRR and PYD domains-containing protein 3 (Cold autoinflammatory syndrome 1 protein homolog) (Cryopyrin) (PYRIN-containing APAF1-like protein 1) (Mast cell maturation-associated-inducible protein 1) | Nlrp3 (Cias1) (Mmig1) (Nalp3) (Pypaf1) | 30   | 20   | 24  | 23  |
| Q8BGQ7 | Alanyl-tRNA synthetase, cytoplasmic (EC 6.1.1.7) (Alanine--tRNA ligase) (AlaRS)                                                                                                                              | Aars                                   | 179  | 216  | 23  | 22  |
| Q91V92 | ATP-citrate synthase (EC 2.3.3.8) (ATP-citrate (pro-S-)-lyase) (Citrate cleavage enzyme)                                                                                                                     | Acly                                   | 349  | 488  | 45  | 43  |
| Q61768 | Kinesin-1 heavy chain (Ubiquitous kinesin heavy chain) (UKHC) (Conventional kinesin heavy chain)                                                                                                             | Kif5b (Khcs) (Kns1)                    | 102  | 303  | 43  | 41  |
| P62827 | GTP-binding nuclear protein Ran (GTPase Ran) (Ras-related nuclear protein) (Ras-like protein TC4)                                                                                                            | Ran (Rasl2-8)                          | 756  | 656  | 38  | 36  |
| P30275 | Creatine kinase, ubiquitous mitochondrial (EC 2.7.3.2) (U-MtCK) (Acidic-type mitochondrial creatine kinase) (Mia-CK)                                                                                         | Ckmt1                                  | 205  | 121  | 32  | 30  |
| Q04447 | Creatine kinase B-type (EC 2.7.3.2) (Creatine kinase B chain) (B-CK)                                                                                                                                         | Ckb (Ckbb)                             | 9079 | 7277 | 434 | 406 |

|        |                                                                                                                                                                                                                     |                                    |     |      |     |     |
|--------|---------------------------------------------------------------------------------------------------------------------------------------------------------------------------------------------------------------------|------------------------------------|-----|------|-----|-----|
| P35969 | Vascular endothelial growth factor receptor 1 (VEGFR-1) (EC 2.7.10.1) (Tyrosine-protein kinase receptor FLT) (FLT-1) (Embryonic receptor kinase 2)                                                                  | Flt1 (Emrk2) (Flt)                 | 29  | 36   | 35  | 32  |
| Q01853 | Transitional endoplasmic reticulum ATPase (TER ATPase) (15S Mg(2+)-ATPase p97 subunit) (Valosin-containing protein) (VCP)                                                                                           | Vcp                                | 691 | 699  | 56  | 51  |
| Q8CGC7 | Bifunctional aminoacyl-tRNA synthetase [Includes: Glutamyl-tRNA synthetase (EC 6.1.1.17) (Glutamate--tRNA ligase); Prolyl-tRNA synthetase (EC 6.1.1.15) (Proline--tRNA ligase)]                                     | Eprs (Qprs)                        | 130 | 102  | 32  | 29  |
| Q8VDD5 | Myosin-9 (Myosin heavy chain 9) (Myosin heavy chain, non-muscle IIa) (Non-muscle myosin heavy chain IIa) (NMMHC II-a) (NMMHC-IIA) (Cellular myosin heavy chain, type A) (Non-muscle myosin heavy chain-A) (NMMHC-A) | Myh9                               | 780 | 839  | 127 | 115 |
| P07310 | Creatine kinase M-type (EC 2.7.3.2) (Creatine kinase M chain) (M-CK)                                                                                                                                                | Ckm (Ckmm)                         | 73  | 107  | 31  | 28  |
| Q99104 | Myosin-Va (Dilute myosin heavy chain, non-muscle)                                                                                                                                                                   | Myo5a (Dilute)                     | 28  | 34   | 35  | 31  |
| P33173 | Kinesin-like protein KIF1A (Axonal transporter of synaptic vesicles)                                                                                                                                                | Kif1a (Atsv) (Kif1)                | 45  | 108  | 25  | 22  |
| Q02053 | Ubiquitin-like modifier-activating enzyme 1 (Ubiquitin-activating enzyme E1) (Ubiquitin-like modifier-activating enzyme 1 X) (Ubiquitin-activating enzyme E1 X)                                                     | Uba1 (Sbx) (Ube1) (Ube1ax) (Ube1x) | 660 | 1086 | 63  | 55  |
| Q8VHE6 | Dynein heavy chain 5, axonemal (Axonemal beta dynein heavy chain 5) (Mdnah5) (Ciliary dynein heavy chain 5)                                                                                                         | Dnah5 (Dnahc5)                     | 47  | 44   | 83  | 72  |
| Q9Z1Q9 | Valyl-tRNA synthetase (EC 6.1.1.9) (Valine--tRNA ligase) (ValRS) (Protein G7a)                                                                                                                                      | Vars (Bat6) (G7a) (Vars2)          | 380 | 302  | 37  | 32  |
| Q921E2 | Ras-related protein Rab-31                                                                                                                                                                                          | Rab31                              | 18  | 29   | 7   | 6   |

|        |                                                                                                                                                                                                                   |                          |     |     |    |    |
|--------|-------------------------------------------------------------------------------------------------------------------------------------------------------------------------------------------------------------------|--------------------------|-----|-----|----|----|
| O88866 | Hormonally up-regulated neu tumor-associated kinase (EC 2.7.11.1)<br>(Serine/threonine-protein kinase MAK-V)                                                                                                      | Hunk (Makv)              | 27  | 21  | 14 | 12 |
| Q9JM52 | Misshapen-like kinase 1 (EC 2.7.11.1)<br>(Mitogen-activated protein kinase kinase kinase 6) (MAPK/ERK kinase kinase 6) (MEK kinase kinase 6) (MEKKK 6)<br>(Misshapen/NIK-related kinase) (GCK family kinase MiNK) | Mink1 (Map4k6)<br>(Mink) | 18  | 54  | 13 | 11 |
| Q9CQN1 | Heat shock protein 75 kDa, mitochondrial (HSP 75) (Tumor necrosis factor type 1 receptor-associated protein) (TRAP-1) (TNFR-associated protein 1)                                                                 | Trap1 (Hsp75)            | 197 | 335 | 13 | 11 |
| P20029 | 78 kDa glucose-regulated protein (GRP 78) (Heat shock 70 kDa protein 5) (Immunoglobulin heavy chain-binding protein) (BiP)                                                                                        | Hspa5 (Grp78)            | 262 | 312 | 25 | 21 |
| P46664 | Adenylosuccinate synthetase isozyme 2 (AMPSase 2) (AdSS 2) (EC 6.3.4.4) (Adenylosuccinate synthetase, non-muscle isozyme) (Adenylosuccinate synthetase, acidic isozyme) (IMP--aspartate ligase 2)                 | Adss (Adss2)             | 36  | 66  | 12 | 10 |
| P11983 | T-complex protein 1 subunit alpha B (TCP-1-alpha) (CCT-alpha) (Tailless complex polypeptide 1B) (TCP-1-B)                                                                                                         | Cct1 (Ccta)<br>(Tcp1)    | 29  | 66  | 18 | 15 |
| Q91XQ0 | Dynein heavy chain 8, axonemal (Axonemal beta dynein heavy chain 8) (Ciliary dynein heavy chain 8)                                                                                                                | Dnahc8                   | 47  | 51  | 77 | 64 |
| Q6URW6 | Myosin-14 (Myosin heavy chain 14) (Myosin heavy chain, non-muscle IIc) (Non-muscle myosin heavy chain IIc) (NMHC II-C)                                                                                            | Myh14                    | 60  | 48  | 53 | 44 |

|        |                                                                                                                                                                                                                                                                |                         |     |     |    |    |
|--------|----------------------------------------------------------------------------------------------------------------------------------------------------------------------------------------------------------------------------------------------------------------|-------------------------|-----|-----|----|----|
| Q8R429 | Sarcoplasmic/endoplasmic reticulum calcium ATPase 1 (SERCA1) (EC 3.6.3.8) (Calcium pump 1) (Calcium-transporting ATPase sarcoplasmic reticulum type, fast twitch skeletal muscle isoform) (SR Ca(2+)-ATPase 1) (Endoplasmic reticulum class 1/2 Ca(2+) ATPase) | Atp2a1                  | 25  | 17  | 17 | 14 |
| P80316 | T-complex protein 1 subunit epsilon (TCP-1-epsilon) (CCT-epsilon)                                                                                                                                                                                              | Cct5 (Ccte) (Kiaa0098)  | 239 | 102 | 17 | 14 |
| Q569Z5 | Probable ATP-dependent RNA helicase DDX46 (EC 3.6.1.-) (DEAD box protein 46)                                                                                                                                                                                   | Ddx46 (Kiaa0801)        | 25  | 17  | 21 | 17 |
| Q80ZW0 | Serine/threonine-protein kinase 35 (EC 2.7.11.1)                                                                                                                                                                                                               | Stk35                   | 14  | 50  | 21 | 17 |
| Q921J2 | GTP-binding protein Rheb (Ras homolog enriched in brain)                                                                                                                                                                                                       | Rheb                    | 21  | 44  | 31 | 25 |
| Q62407 | Striated muscle-specific serine/threonine protein kinase (EC 2.7.11.1) (Aortic preferentially expressed protein 1) (APEG-1)                                                                                                                                    | Speg (Apeg1) (Kiaa1297) | 26  | 20  | 31 | 25 |
| Q8VI47 | Canalicular multispecific organic anion transporter 1 (ATP-binding cassette sub-family C member 2)                                                                                                                                                             | Abcc2                   | 31  | 38  | 39 | 31 |
| Q8C196 | Carbamoyl-phosphate synthase [ammonia], mitochondrial (EC 6.3.4.16) (Carbamoyl-phosphate synthetase I) (CPSase I)                                                                                                                                              | Cps1                    | 22  | 25  | 19 | 15 |
| Q80UN9 | tRNA isopentenyltransferase, mitochondrial (IPTase) (EC 2.5.1.8) (Isopentenyl-diphosphate:tRNA isopentenyltransferase) (IPP transferase) (IPPT)                                                                                                                | Trit1 (lpt)             | 31  | 24  | 19 | 15 |
| Q8CIQ7 | Dedicator of cytokinesis protein 3 (Modifier of cell adhesion) (Presenilin-binding protein) (PBP)                                                                                                                                                              | Dock3 (Moca)            | 80  | 56  | 33 | 26 |

|        |                                                                                                                                                                                                                            |                                        |     |     |     |     |
|--------|----------------------------------------------------------------------------------------------------------------------------------------------------------------------------------------------------------------------------|----------------------------------------|-----|-----|-----|-----|
| Q9JHU4 | Cytoplasmic dynein 1 heavy chain 1 (Cytoplasmic dynein heavy chain 1) (Dynein heavy chain, cytosolic)                                                                                                                      | Dync1h1 (Dhc1) (Dnch1) (Dnchc1) (Dyhc) | 822 | 395 | 157 | 123 |
| P31254 | Ubiquitin-like modifier-activating enzyme 1 Y (Ubiquitin-activating enzyme E1 Y) (Ubiquitin-activating enzyme E1)                                                                                                          | Ube1ay (Sby) (Ube1y) (Ube1y1)          | 161 | 77  | 22  | 17  |
| Q8CGK3 | Lon protease homolog, mitochondrial (EC 3.4.21.-) (Lon protease-like protein) (LONP) (Mitochondrial ATP-dependent protease Lon) (Serine protease 15)                                                                       | Lonp1 (Prss15)                         | 21  | 30  | 43  | 33  |
| Q8JZQ2 | AFG3-like protein 2 (EC 3.4.24.-)                                                                                                                                                                                          | Afg3l2                                 | 15  | 27  | 17  | 13  |
| Q569Z6 | Thyroid hormone receptor-associated protein 3 (Thyroid hormone receptor-associated protein complex 150 kDa component) (Trap150)                                                                                            | Thrap3 (Trap150)                       | 29  | 48  | 21  | 16  |
| P16627 | Heat shock 70 kDa protein 1L (Heat shock 70 kDa protein 1-like) (Heat shock 70 kDa-like protein 1) (Spermatid-specific heat shock protein 70)                                                                              | Hspa1l (Hsc70t)                        | 319 | 238 | 33  | 25  |
| O70228 | Probable phospholipid-transporting ATPase IIA (EC 3.6.3.1) (ATPase class II type 9A)                                                                                                                                       | Atp9a                                  | 31  | 29  | 37  | 28  |
| P56480 | ATP synthase subunit beta, mitochondrial (EC 3.6.3.14)                                                                                                                                                                     | Atp5b                                  | 31  | 50  | 8   | 6   |
| Q02956 | Protein kinase C zeta type (EC 2.7.11.13) (nPKC-zeta)                                                                                                                                                                      | Prkcz (PkcZ)                           | 29  | 15  | 8   | 6   |
| Q9DBP5 | UMP-CMP kinase (EC 2.7.4.14) (Cytidylate kinase) (Deoxycytidylate kinase) (Cytidine monophosphate kinase) (Uridine monophosphate kinase) (Uridine monophosphate/cytidine monophosphate kinase) (UMP/CMP kinase) (UMP/CMPK) | Cmpk1 (Cmk) (Cmpk) (Uck) (Umk) (Umpk)  | 107 | 93  | 12  | 9   |
| Q8K045 | Serine/threonine-protein kinase N3 (EC 2.7.11.13) (Protein kinase PKN-beta) (Protein-kinase C-related kinase 3)                                                                                                            | Pkn3 (Pknbeta)                         | 130 | 126 | 36  | 27  |

|        |                                                                                                                                      |                                    |      |      |     |     |
|--------|--------------------------------------------------------------------------------------------------------------------------------------|------------------------------------|------|------|-----|-----|
| P60710 | Actin, cytoplasmic 1 (Beta-actin)                                                                                                    | Actb                               | 5140 | 4496 | 282 | 208 |
| Q61656 | Probable ATP-dependent RNA helicase DDX5 (EC 3.6.1.-) (DEAD box protein 5) (RNA helicase p68) (DEAD box RNA helicase DEAD1) (mDEAD1) | Ddx5 (Tnz2)                        | 90   | 43   | 11  | 8   |
| Q61696 | Heat shock 70 kDa protein 1A (Heat shock 70 kDa protein 3) (HSP70.3) (Hsp68)                                                         | Hspa1a (Hsp70-3) (Hsp70A1)         | 266  | 236  | 33  | 24  |
| Q61699 | Heat shock protein 105 kDa (Heat shock-related 100 kDa protein E7I) (HSP-E7I) (Heat shock 110 kDa protein) (42 degrees C-HSP)        | Hsph1 (Hsp105) (Hsp110) (Kiaa0201) | 46   | 48   | 18  | 13  |
| Q8BMJ2 | Leucyl-tRNA synthetase, cytoplasmic (EC 6.1.1.4) (Leucine--tRNA ligase) (LeuRS)                                                      | Lars                               | 52   | 45   | 47  | 33  |
| P61294 | Ras-related protein Rab-6B                                                                                                           | Rab6b (D9Bwg0185e)                 | 18   | 53   | 10  | 7   |
| Q91YJ5 | Translation initiation factor IF-2, mitochondrial (IF-2Mt) (IF2(mt)) (IF-2(Mt))                                                      | Mtif2                              | 29   | 23   | 13  | 9   |
| Q9CWF2 | Tubulin beta-2B chain                                                                                                                | Tubb2b                             | 1435 | 825  | 86  | 59  |
| P99024 | Tubulin beta-5 chain                                                                                                                 | Tubb5                              | 1377 | 976  | 88  | 60  |
| Q6PHN9 | Ras-related protein Rab-35                                                                                                           | Rab35                              | 17   | 59   | 3   | 2   |
| P61164 | Alpha-centractin (Centractin) (Centrosome-associated actin homolog) (Actin-RPV) (ARP1)                                               | Actr1a (Ctrn1)                     | 247  | 124  | 27  | 18  |
| P68033 | Actin, alpha cardiac muscle 1 (Alpha-cardiac actin)                                                                                  | Actc1 (Actc)                       | 3948 | 2726 | 234 | 155 |
| P68372 | Tubulin beta-2C chain                                                                                                                | Tubb2c                             | 1300 | 891  | 78  | 51  |
| P42932 | T-complex protein 1 subunit theta (TCP-1-theta) (CCT-theta)                                                                          | Cct8 (Cctq)                        | 197  | 57   | 23  | 15  |
| P61161 | Actin-related protein 2 (Actin-like protein 2)                                                                                       | Actr2 (Arp2)                       | 247  | 124  | 28  | 18  |
| Q8CG48 | Structural maintenance of chromosomes protein 2 (Chromosome-associated protein E) (XCAP-E homolog) (FGF-inducible protein 16)        | Smc2 (Cape) (Fin16) (Smc2l1)       | 32   | 36   | 41  | 26  |



|        |                                                                                                                                                                                                                               |                                 |      |     |    |    |
|--------|-------------------------------------------------------------------------------------------------------------------------------------------------------------------------------------------------------------------------------|---------------------------------|------|-----|----|----|
| Q7TMM9 | Tubulin beta-2A chain                                                                                                                                                                                                         | Tubb2a<br>(Tubb2)               | 1422 | 775 | 83 | 52 |
| Q8C7H1 | Methylmalonic aciduria type A homolog, mitochondrial                                                                                                                                                                          | Mmaa                            | 31   | 37  | 16 | 10 |
| P17156 | Heat shock-related 70 kDa protein 2 (Heat shock protein 70.2)                                                                                                                                                                 | Hspa2<br>(Hcp70.2)<br>(Hsp70-2) | 964  | 544 | 60 | 37 |
| Q61879 | Myosin-10 (Myosin heavy chain 10) (Myosin heavy chain, non-muscle IIb) (Non-muscle myosin heavy chain IIb) (NMMHC II-b) (NMMHC-IIB) (Cellular myosin heavy chain, type B) (Non-muscle myosin heavy chain-B) (NMMHC-B)         | Myh10                           | 122  | 101 | 65 | 40 |
| Q9Z0P5 | Twinfilin-2 (Twinfilin-1-like protein) (A6-related protein) (mA6RP)                                                                                                                                                           | Twf2 (Ptk9I)                    | 29   | 32  | 10 | 6  |
| Q9QWK5 | Baculoviral IAP repeat-containing protein 1a (Neuronal apoptosis inhibitory protein 1)                                                                                                                                        | Naip1 (Birc1a)<br>(Naip)        | 21   | 28  | 20 | 12 |
| Q9EQZ6 | Rap guanine nucleotide exchange factor 4 (cAMP-regulated guanine nucleotide exchange factor II) (cAMP-GEFII) (Exchange factor directly activated by cAMP 2) (Epac 2) (cAMP-dependent Rap1 guanine-nucleotide exchange factor) | Rapgef4<br>(Cgef2)<br>(Epac2)   | 47   | 23  | 20 | 12 |
| P63038 | 60 kDa heat shock protein, mitochondrial (Heat shock protein 60) (HSP-60) (Hsp60) (60 kDa chaperonin) (Chaperonin 60) (CPN60) (Mitochondrial matrix protein P1) (HSP-65)                                                      | Hspd1<br>(Hsp60)                | 15   | 32  | 22 | 13 |
| P80317 | T-complex protein 1 subunit zeta (TCP-1-zeta) (CCT-zeta) (CCT-zeta-1)                                                                                                                                                         | Cct6a (Cct6)<br>(Cctz) (Cctz1)  | 160  | 52  | 22 | 13 |
| P10630 | Eukaryotic initiation factor 4A-II (eIF-4A-II) (eIF4A-II) (EC 3.6.1.-) (ATP-dependent RNA helicase eIF4A-2)                                                                                                                   | Eif4a2<br>(Ddx2b)               | 194  | 78  | 17 | 10 |

|        |                                                                                                                                                                                                                                     |                                 |      |     |     |    |
|--------|-------------------------------------------------------------------------------------------------------------------------------------------------------------------------------------------------------------------------------------|---------------------------------|------|-----|-----|----|
| P09041 | Phosphoglycerate kinase 2 (EC 2.7.2.3)<br>(Phosphoglycerate kinase, testis specific)                                                                                                                                                | Pgk2 (Pgk-2)                    | 162  | 73  | 17  | 10 |
| P63017 | Heat shock cognate 71 kDa protein (Heat shock 70 kDa protein 8)                                                                                                                                                                     | Hspa8<br>(Hsc70)<br>(Hsc73)     | 1719 | 959 | 119 | 70 |
| P05532 | Mast/stem cell growth factor receptor (SCFR)<br>(EC 2.7.10.1) (Proto-oncogene tyrosine-protein kinase Kit) (c-kit) (CD antigen CD117)                                                                                               | Kit (SI)                        | 16   | 35  | 12  | 7  |
| Q9QUK4 | Baculoviral IAP repeat-containing protein 1b<br>(Neuronal apoptosis inhibitory protein 2)                                                                                                                                           | Naip2 (Birc1b)<br>(Naip-rs6)    | 21   | 28  | 14  | 8  |
| Q8K2I9 | F-box only protein 18 (EC 3.6.1.-) (F-box DNA helicase 1)                                                                                                                                                                           | Fbxo18 (Fbh1)<br>(Fbx18)        | 30   | 23  | 9   | 5  |
| Q8BYH8 | Chromodomain-helicase-DNA-binding protein 9 (CHD-9) (EC 3.6.1.-) (ATP-dependent helicase CHD9) (Peroxisomal proliferator-activated receptor A-interacting complex 320 kDa protein) (PPAR-alpha-interacting complex protein 320 kDa) | Chd9<br>(Kiaa0308)<br>(Pric320) | 39   | 27  | 49  | 27 |
| Q9WTU3 | Sodium channel protein type 8 subunit alpha<br>(Sodium channel protein type VIII subunit alpha) (Voltage-gated sodium channel subunit alpha Nav1.6)                                                                                 | Scn8a<br>(Nbna1)                | 28   | 19  | 20  | 11 |
| Q9D6F9 | Tubulin beta-4 chain                                                                                                                                                                                                                | Tubb4                           | 888  | 493 | 58  | 31 |
| Q61390 | T-complex protein 1 subunit zeta-2 (TCP-1-zeta-2) (CCT-zeta-2) (Cctz-2)                                                                                                                                                             | Cct6b                           | 55   | 52  | 15  | 8  |
| Q922F4 | Tubulin beta-6 chain                                                                                                                                                                                                                | Tubb6                           | 583  | 382 | 40  | 21 |
| Q9ERD7 | Tubulin beta-3 chain                                                                                                                                                                                                                | Tubb3                           | 780  | 383 | 52  | 27 |
| Q80UE6 | Serine/threonine-protein kinase WNK4 (EC 2.7.11.1) (Protein kinase with no lysine 4) (Protein kinase, lysine-deficient 4)                                                                                                           | Wnk4<br>(Prkwnk4)               | 23   | 33  | 29  | 15 |

|               |                                                                                                                                |                                                                                                                                      |                     |     |      |    |     |
|---------------|--------------------------------------------------------------------------------------------------------------------------------|--------------------------------------------------------------------------------------------------------------------------------------|---------------------|-----|------|----|-----|
| actin binding | Q8BTM8                                                                                                                         | Filamin-A (Alpha-filamin) (Filamin-1) (Endothelial actin-binding protein) (Actin-binding protein 280) (ABP-280) (Non-muscle filamin) | Flna (Fln) (Fln1)   | 254 | 1031 | 46 | 86  |
|               | P62962                                                                                                                         | Profilin-1 (Profilin I)                                                                                                              | Pfn1                | 30  | 93   | 4  | 7   |
|               | P18760                                                                                                                         | Cofilin-1 (Cofilin, non-muscle isoform)                                                                                              | Cfl1                | 959 | 2552 | 70 | 122 |
|               | P61982                                                                                                                         | 14-3-3 protein gamma                                                                                                                 | Ywhag               | 653 | 841  | 53 | 79  |
|               | Q8VHX6                                                                                                                         | Filamin-C (Gamma-filamin) (Filamin-2) (FLN-C) (Actin-binding-like protein) (ABP-L) (ABP-280-like protein)                            | Flnc (Abpl) (Fln2)  | 33  | 115  | 18 | 25  |
|               | P68510                                                                                                                         | 14-3-3 protein eta                                                                                                                   | Ywhah               | 707 | 962  | 58 | 80  |
|               | Q8K298                                                                                                                         | Actin-binding protein anillin                                                                                                        | Anln                | 16  | 28   | 17 | 23  |
|               | P47753                                                                                                                         | F-actin-capping protein subunit alpha-1 (CapZ alpha-1)                                                                               | Capza1 (Cappa1)     | 60  | 33   | 7  | 9   |
|               | Q80X90                                                                                                                         | Filamin-B (FLN-B) (Beta-filamin) (Actin-binding like protein) (ABP-280-like protein)                                                 | Flnb                | 63  | 279  | 32 | 41  |
|               | P47754                                                                                                                         | F-actin-capping protein subunit alpha-2 (CapZ alpha-2)                                                                               | Capza2 (Cappa2)     | 60  | 33   | 5  | 6   |
|               | Q9WUM4                                                                                                                         | Coronin-1C (Coronin-3)                                                                                                               | Coro1c              | 42  | 28   | 18 | 21  |
|               | Q62418                                                                                                                         | Drebrin-like protein (SH3 domain-containing protein 7) (Actin-binding protein 1)                                                     | Dbnl (Abp1) (Sh3p7) | 24  | 39   | 7  | 8   |
|               | P40124                                                                                                                         | Adenylyl cyclase-associated protein 1 (CAP 1)                                                                                        | Cap1 (Cap)          | 22  | 43   | 8  | 9   |
|               | Q91X97                                                                                                                         | Neurocalcin-delta                                                                                                                    | Ncald (D15Ert412e)  | 85  | 82   | 8  | 9   |
| Q91ZT5        | FYVE, RhoGEF and PH domain-containing protein 4 (Actin filament-binding protein frabin) (FGD1-related F-actin-binding protein) | Fgd4                                                                                                                                 | 29                  | 19  | 10   | 11 |     |
| P16546        | Spectrin alpha chain, brain (Spectrin, non-erythroid alpha chain) (Alpha-II spectrin) (Fodrin alpha chain)                     | Sptan1 (Spna2) (Spta2)                                                                                                               | 68                  | 86  | 66   | 69 |     |
| P26039        | Talin-1                                                                                                                        | Tln1 (Tln)                                                                                                                           | 123                 | 161 | 41   | 42 |     |

|        |                                                                                                                                                                                                                     |                                       |     |     |     |     |
|--------|---------------------------------------------------------------------------------------------------------------------------------------------------------------------------------------------------------------------|---------------------------------------|-----|-----|-----|-----|
| Q62261 | Spectrin beta chain, brain 1 (Spectrin, non-erythroid beta chain 1) (Beta-II spectrin) (Fodrin beta chain) (Embryonic liver fodrin)                                                                                 | Sptbn1 (Elf) (Spnb-2) (Spnb2) (Sptb2) | 56  | 54  | 48  | 48  |
| P45591 | Cofilin-2 (Cofilin, muscle isoform)                                                                                                                                                                                 | Cfl2                                  | 528 | 431 | 39  | 38  |
| O08638 | Myosin-11 (Myosin heavy chain 11) (Myosin heavy chain, smooth muscle isoform) (SMMHC)                                                                                                                               | Myh11                                 | 211 | 221 | 79  | 76  |
| Q8CGC7 | Bifunctional aminoacyl-tRNA synthetase [Includes: Glutamyl-tRNA synthetase (EC 6.1.1.17) (Glutamate--tRNA ligase); Prolyl-tRNA synthetase (EC 6.1.1.15) (Proline--tRNA ligase)]                                     | Eprs (Qprs)                           | 130 | 102 | 32  | 29  |
| Q8VDD5 | Myosin-9 (Myosin heavy chain 9) (Myosin heavy chain, non-muscle IIa) (Non-muscle myosin heavy chain IIa) (NMMHC II-a) (NMMHC-IIA) (Cellular myosin heavy chain, type A) (Non-muscle myosin heavy chain-A) (NMMHC-A) | Myh9                                  | 780 | 839 | 127 | 115 |
| Q99104 | Myosin-Va (Dilute myosin heavy chain, non-muscle)                                                                                                                                                                   | Myo5a (Dilute)                        | 28  | 34  | 35  | 31  |
| Q9R0P5 | Destrin (Actin-depolymerizing factor) (ADF) (Sid 23)                                                                                                                                                                | Dstn (Dsn) (Sid23)                    | 61  | 81  | 8   | 7   |
| Q8R4U0 | Stabilin-2 (Fasciclin, EGF-like, laminin-type EGF-like and link domain-containing scavenger receptor 2) (FEEL-2) [Cleaved into: Short form stabilin-2]                                                              | Stab2 (Feel2)                         | 25  | 43  | 12  | 10  |
| P11531 | Dystrophin                                                                                                                                                                                                          | Dmd                                   | 25  | 16  | 66  | 55  |
| Q6URW6 | Myosin-14 (Myosin heavy chain 14) (Myosin heavy chain, non-muscle IIc) (Non-muscle myosin heavy chain IIc) (NMHC II-C)                                                                                              | Myh14                                 | 60  | 48  | 53  | 44  |
| Q91ZU6 | Bullous pemphigoid antigen 1, isoforms 1/2/3/4 (BPA) (Hemidesmosomal plaque protein) (Dystonia musculorum protein) (Dystonin)                                                                                       | Dst (Bpag1)                           | 78  | 38  | 126 | 100 |

|                          |        |                                                                                                                                                                                                                                                       |                                  |     |     |    |    |
|--------------------------|--------|-------------------------------------------------------------------------------------------------------------------------------------------------------------------------------------------------------------------------------------------------------|----------------------------------|-----|-----|----|----|
|                          | P97434 | Myosin phosphatase Rho-interacting protein (Rho-interacting protein 3) (RIP3) (p116Rip)                                                                                                                                                               | Mprip (Kiaa0864) (Mrip) (Rhoip3) | 35  | 23  | 25 | 19 |
|                          | Q8K4L3 | Supervillin (Archvillin) (p205/p250)                                                                                                                                                                                                                  | Svil                             | 25  | 22  | 18 | 12 |
|                          | P61161 | Actin-related protein 2 (Actin-like protein 2)                                                                                                                                                                                                        | Actr2 (Arp2)                     | 247 | 124 | 28 | 18 |
|                          | Q61879 | Myosin-10 (Myosin heavy chain 10) (Myosin heavy chain, non-muscle IIb) (Non-muscle myosin heavy chain IIb) (NMMHC II-b) (NMMHC-IIB) (Cellular myosin heavy chain, type B) (Non-muscle myosin heavy chain-B) (NMMHC-B)                                 | Myh10                            | 122 | 101 | 65 | 40 |
|                          | Q9Z0P5 | Twinfilin-2 (Twinfilin-1-like protein) (A6-related protein) (mA6RP)                                                                                                                                                                                   | Twf2 (Ptk9l)                     | 29  | 32  | 10 | 6  |
|                          | P26040 | Ezrin (p81) (Cytovillin) (Villin-2)                                                                                                                                                                                                                   | Ezr (Vil2)                       | 127 | 106 | 27 | 16 |
|                          | P47757 | F-actin-capping protein subunit beta (CapZ beta)                                                                                                                                                                                                      | Capzb (Cappb1)                   | 107 | 68  | 7  | 4  |
|                          | P26043 | Radixin (ESP10)                                                                                                                                                                                                                                       | Rdx                              | 127 | 106 | 23 | 13 |
| ATPase activity, coupled | P97311 | DNA replication licensing factor MCM6 (Mis5 homolog)                                                                                                                                                                                                  | Mcm6 (Mcmd6) (Mis5)              | 110 | 395 | 20 | 38 |
|                          | Q9Z129 | ATP-dependent DNA helicase Q1 (EC 3.6.1.-) (DNA-dependent ATPase Q1)                                                                                                                                                                                  | Recql (Recql1)                   | 17  | 27  | 13 | 22 |
|                          | Q501J6 | Probable ATP-dependent RNA helicase DDX17 (EC 3.6.1.-) (DEAD box protein 17)                                                                                                                                                                          | Ddx17                            | 90  | 43  | 7  | 11 |
|                          | P27641 | ATP-dependent DNA helicase 2 subunit 2 (EC 3.6.1.-) (ATP-dependent DNA helicase II 80 kDa subunit) (Ku autoantigen protein p86 homolog) (Ku80) (CTC box-binding factor 85 kDa subunit) (CTCBF) (CTC85) (Nuclear factor IV) (DNA repair protein XRCC5) | Xrcc5 (G22p2)                    | 22  | 29  | 16 | 22 |

|        |                                                                                                                                                                                                                                |                       |     |     |     |     |
|--------|--------------------------------------------------------------------------------------------------------------------------------------------------------------------------------------------------------------------------------|-----------------------|-----|-----|-----|-----|
| Q5SXJ3 | Fanconi anemia group J protein homolog (Protein FACJ) (EC 3.6.1.-) (ATP-dependent RNA helicase BRIP1) (BRCA1-interacting protein C-terminal helicase 1) (BRCA1-interacting protein 1) (BRCA1-associated C-terminal helicase 1) | Brip1 (Bach1) (Fancj) | 25  | 18  | 13  | 17  |
| Q61496 | Probable ATP-dependent RNA helicase DDX4 (EC 3.6.1.-) (DEAD box protein 4) (Vasa homolog) (Mvh)                                                                                                                                | Ddx4 (Vasa)           | 17  | 25  | 44  | 56  |
| Q60848 | Lymphocyte-specific helicase (EC 3.6.1.-) (Proliferation associated SNF2-like protein)                                                                                                                                         | Hells (Lsh) (Pasg)    | 37  | 35  | 10  | 12  |
| Q9R0K7 | Plasma membrane calcium-transporting ATPase 2 (PMCA2) (EC 3.6.3.8) (Plasma membrane calcium ATPase isoform 2) (Plasma membrane calcium pump isoform 2)                                                                         | Atp2b2 (Pmca2)        | 32  | 27  | 70  | 83  |
| P49718 | DNA replication licensing factor MCM5 (CDC46 homolog) (P1-CDC46)                                                                                                                                                               | Mcm5 (Cdc46) (Mcmd5)  | 40  | 20  | 18  | 21  |
| P49717 | DNA replication licensing factor MCM4 (CDC21 homolog) (P1-CDC21)                                                                                                                                                               | Mcm4 (Cdc21) (Mcmd4)  | 29  | 18  | 11  | 12  |
| P25206 | DNA replication licensing factor MCM3 (DNA polymerase alpha holoenzyme-associated protein P1) (P1-MCM3)                                                                                                                        | Mcm3 (Mcmd) (Mcmd3)   | 74  | 185 | 15  | 15  |
| Q8VDD5 | Myosin-9 (Myosin heavy chain 9) (Myosin heavy chain, non-muscle IIa) (Non-muscle myosin heavy chain IIa) (NMMHC II-a) (NMMHC-IIA) (Cellular myosin heavy chain, type A) (Non-muscle myosin heavy chain-A) (NMMHC-A)            | Myh9                  | 780 | 839 | 127 | 115 |
| Q6URW6 | Myosin-14 (Myosin heavy chain 14) (Myosin heavy chain, non-muscle IIc) (Non-muscle myosin heavy chain IIc) (NMHC II-C)                                                                                                         | Myh14                 | 60  | 48  | 53  | 44  |

|        |                                                                                                                                                                                                                                                                                                        |                  |     |     |    |    |
|--------|--------------------------------------------------------------------------------------------------------------------------------------------------------------------------------------------------------------------------------------------------------------------------------------------------------|------------------|-----|-----|----|----|
| Q8R429 | Sarcoplasmic/endoplasmic reticulum calcium ATPase 1 (SERCA1) (EC 3.6.3.8) (Calcium pump 1) (Calcium-transporting ATPase sarcoplasmic reticulum type, fast twitch skeletal muscle isoform) (SR Ca(2+)-ATPase 1) (Endoplasmic reticulum class 1/2 Ca(2+) ATPase)                                         | Atp2a1           | 25  | 17  | 17 | 14 |
| Q569Z5 | Probable ATP-dependent RNA helicase DDX46 (EC 3.6.1.-) (DEAD box protein 46)                                                                                                                                                                                                                           | Ddx46 (Kiaa0801) | 25  | 17  | 21 | 17 |
| Q8VI47 | Canalicular multispecific organic anion transporter 1 (ATP-binding cassette sub-family C member 2)                                                                                                                                                                                                     | Abcc2            | 31  | 38  | 39 | 31 |
| O70228 | Probable phospholipid-transporting ATPase IIA (EC 3.6.3.1) (ATPase class II type 9A)                                                                                                                                                                                                                   | Atp9a            | 31  | 29  | 37 | 28 |
| P56480 | ATP synthase subunit beta, mitochondrial (EC 3.6.3.14)                                                                                                                                                                                                                                                 | Atp5b            | 31  | 50  | 8  | 6  |
| Q61656 | Probable ATP-dependent RNA helicase DDX5 (EC 3.6.1.-) (DEAD box protein 5) (RNA helicase p68) (DEAD box RNA helicase DEAD1) (mDEAD1)                                                                                                                                                                   | Ddx5 (Tnz2)      | 90  | 43  | 11 | 8  |
| Q61983 | Sodium-dependent phosphate transport protein 1 (Sodium/phosphate cotransporter 1) (Na(+)/PI cotransporter 1) (Solute carrier family 17 member 1) (Renal sodium-dependent phosphate transport protein 1) (Renal sodium-phosphate transport protein 1) (Renal Na(+)-dependent phosphate cotransporter 1) | Slc17a1 (Npt1)   | 31  | 33  | 8  | 5  |
| Q61879 | Myosin-10 (Myosin heavy chain 10) (Myosin heavy chain, non-muscle IIb) (Non-muscle myosin heavy chain IIb) (NMMHC II-b) (NMMHC-IIB) (Cellular myosin heavy chain, type B) (Non-muscle myosin heavy chain-B) (NMMHC-B)                                                                                  | Myh10            | 122 | 101 | 65 | 40 |

|                    |        |                                                                                                                                                                          |                       |      |     |     |    |
|--------------------|--------|--------------------------------------------------------------------------------------------------------------------------------------------------------------------------|-----------------------|------|-----|-----|----|
|                    | P10630 | Eukaryotic initiation factor 4A-II (eIF-4A-II) (eIF4A-II) (EC 3.6.1.-) (ATP-dependent RNA helicase eIF4A-2)                                                              | Eif4a2 (Ddx2b)        | 194  | 78  | 17  | 10 |
|                    | P63017 | Heat shock cognate 71 kDa protein (Heat shock 70 kDa protein 8)                                                                                                          | Hspa8 (Hsc70) (Hsc73) | 1719 | 959 | 119 | 70 |
|                    | Q8K2I9 | F-box only protein 18 (EC 3.6.1.-) (F-box DNA helicase 1)                                                                                                                | Fbxo18 (Fbh1) (Fbx18) | 30   | 23  | 9   | 5  |
| nucleotide binding | P97311 | DNA replication licensing factor MCM6 (Mis5 homolog)                                                                                                                     | Mcm6 (Mcmd6) (Mis5)   | 110  | 395 | 20  | 38 |
|                    | O88705 | Potassium/sodium hyperpolarization-activated cyclic nucleotide-gated channel 3 (Hyperpolarization-activated cation channel 3) (HAC-3)                                    | Hcn3 (Hac3)           | 75   | 67  | 8   | 15 |
|                    | Q8R3C6 | Probable RNA-binding protein 19 (RNA-binding motif protein 19)                                                                                                           | Rbm19                 | 26   | 32  | 11  | 20 |
|                    | Q62159 | Rho-related GTP-binding protein RhoC (Silica-induced gene 61 protein) (SIG-61)                                                                                           | Rhoc (Arhc)           | 33   | 173 | 5   | 9  |
|                    | Q8BYC6 | Serine/threonine-protein kinase TAO3 (EC 2.7.11.1) (Thousand and one amino acid protein 3)                                                                               | Taok3                 | 32   | 38  | 9   | 16 |
|                    | Q9R117 | Non-receptor tyrosine-protein kinase TYK2 (EC 2.7.10.2)                                                                                                                  | Tyk2                  | 27   | 30  | 15  | 26 |
|                    | Q8R1S0 | Ubiquinone biosynthesis monooxygenase COQ6 (EC 1.14.13.-)                                                                                                                | Coq6                  | 42   | 92  | 10  | 17 |
|                    | Q9Z129 | ATP-dependent DNA helicase Q1 (EC 3.6.1.-) (DNA-dependent ATPase Q1)                                                                                                     | Recql (Recql1)        | 17   | 27  | 13  | 22 |
|                    | P15532 | Nucleoside diphosphate kinase A (NDP kinase A) (NDK A) (EC 2.7.4.6) (Tumor metastatic process-associated protein) (Metastasis inhibition factor NM23) (NDPK-A) (nm23-M1) | Nme1 (Nm23)           | 150  | 261 | 8   | 13 |
|                    | Q501J6 | Probable ATP-dependent RNA helicase DDX17 (EC 3.6.1.-) (DEAD box protein 17)                                                                                             | Ddx17                 | 90   | 43  | 7   | 11 |



|        |                                                                                                                                                                |                                |      |      |    |    |
|--------|----------------------------------------------------------------------------------------------------------------------------------------------------------------|--------------------------------|------|------|----|----|
| P63001 | Ras-related C3 botulinum toxin substrate 1 (p21-Rac1)                                                                                                          | Rac1                           | 31   | 99   | 7  | 11 |
| Q9Z1S0 | Mitotic checkpoint serine/threonine-protein kinase BUB1 beta (EC 2.7.11.1) (MAD3/BUB1-related protein kinase) (Mitotic checkpoint kinase MAD3L)                | Bub1b (Mad3l)                  | 20   | 41   | 15 | 23 |
| Q8K386 | Ras-related protein Rab-15                                                                                                                                     | Rab15                          | 44   | 74   | 4  | 6  |
| P83741 | Serine/threonine-protein kinase WNK1 (EC 2.7.11.1) (Protein kinase with no lysine 1) (Protein kinase, lysine-deficient 1)                                      | Wnk1 (Prkwk1)                  | 56   | 36   | 18 | 27 |
| P35761 | Dual specificity protein kinase TTK (ESK) (PYT) (EC 2.7.12.1)                                                                                                  | Ttk (Esk)                      | 14   | 34   | 9  | 13 |
| Q00342 | FL cytokine receptor (EC 2.7.10.1) (Tyrosine-protein kinase receptor flk-2) (Fetal liver kinase 2) (Tyrosine-protein kinase FLT3) (CD antigen CD135)           | Flt3 (Flk-2) (Flt3)            | 17   | 34   | 7  | 10 |
| Q9WVP9 | Interferon-induced GTP-binding protein Mx2 (Myxovirus resistance protein 2)                                                                                    | Mx2                            | 32   | 22   | 14 | 20 |
| Q9Z1F9 | SUMO-activating enzyme subunit 2 (EC 6.3.2.-) (Ubiquitin-like 1-activating enzyme E1B) (Anthracycline-associated resistance ARX)                               | Uba2 (Sae2) (Uble1b)           | 62   | 77   | 10 | 14 |
| P05214 | Tubulin alpha-3 chain (Tubulin alpha-3/alpha-7 chain) (Alpha-tubulin 3/7) (Alpha-tubulin isotype M-alpha-3/7)                                                  | Tuba3a (Tuba3); Tuba3b (Tuba7) | 1112 | 1288 | 61 | 84 |
| P17047 | Lysosome-associated membrane glycoprotein 2 (LAMP-2) (Lysosomal membrane glycoprotein type B) (LGP-B) (CD107 antigen-like family member B) (CD antigen CD107b) | Lamp2 (Lamp-2)                 | 26   | 29   | 8  | 11 |

|        |                                                                                                                                                                                                                                                       |                        |     |     |    |    |
|--------|-------------------------------------------------------------------------------------------------------------------------------------------------------------------------------------------------------------------------------------------------------|------------------------|-----|-----|----|----|
| P27641 | ATP-dependent DNA helicase 2 subunit 2 (EC 3.6.1.-) (ATP-dependent DNA helicase II 80 kDa subunit) (Ku autoantigen protein p86 homolog) (Ku80) (CTC box-binding factor 85 kDa subunit) (CTCBF) (CTC85) (Nuclear factor IV) (DNA repair protein XRCC5) | Xrcc5 (G22p2)          | 22  | 29  | 16 | 22 |
| P70296 | Phosphatidylethanolamine-binding protein 1 (PEBP-1) (HCNPPp) [Cleaved into: Hippocampal cholinergic neurostimulating peptide (HCNP)]                                                                                                                  | Pebp1 (Pbp) (Pebp)     | 532 | 730 | 25 | 33 |
| Q5SXJ3 | Fanconi anemia group J protein homolog (Protein FACJ) (EC 3.6.1.-) (ATP-dependent RNA helicase BRIP1) (BRCA1-interacting protein C-terminal helicase 1) (BRCA1-interacting protein 1) (BRCA1-associated C-terminal helicase 1)                        | Brip1 (Bach1) (Fancj)  | 25  | 18  | 13 | 17 |
| Q61846 | Maternal embryonic leucine zipper kinase (EC 2.7.11.1) (Protein kinase PK38) (mPK38)                                                                                                                                                                  | Melk (Kiaa0175) (Pk38) | 28  | 32  | 10 | 13 |
| P63321 | Ras-related protein Ral-A                                                                                                                                                                                                                             | Rala (Ral) (Rala)      | 25  | 22  | 30 | 39 |
| Q61496 | Probable ATP-dependent RNA helicase DDX4 (EC 3.6.1.-) (DEAD box protein 4) (Vasa homolog) (Mvh)                                                                                                                                                       | Ddx4 (Vasa)            | 17  | 25  | 44 | 56 |
| Q62093 | Splicing factor, arginine/serine-rich 2 (Splicing factor SC35) (SC-35) (Splicing component, 35 kDa) (Protein PR264) (Putative myelin regulatory factor 1) (MRF-1)                                                                                     | Sfrs2 (Pr264) (Sfrs10) | 184 | 117 | 15 | 19 |
| P61028 | Ras-related protein Rab-8B                                                                                                                                                                                                                            | Rab8b                  | 17  | 59  | 4  | 5  |
| Q61316 | Heat shock 70 kDa protein 4 (Heat shock 70-related protein APG-2)                                                                                                                                                                                     | Hspa4 (Apg2) (Hsp110)  | 379 | 792 | 42 | 52 |
| Q8BU30 | Isoleucyl-tRNA synthetase, cytoplasmic (EC 6.1.1.5) (Isoleucine--tRNA ligase) (IleRS) (IRS)                                                                                                                                                           | Iars                   | 85  | 46  | 30 | 37 |

|        |                                                                                                                                                                       |                      |     |     |     |     |
|--------|-----------------------------------------------------------------------------------------------------------------------------------------------------------------------|----------------------|-----|-----|-----|-----|
| Q8BGD9 | Eukaryotic translation initiation factor 4B (eIF-4B)                                                                                                                  | Eif4b                | 238 | 306 | 13  | 16  |
| O08648 | Mitogen-activated protein kinase kinase kinase 4 (EC 2.7.11.25) (MAPK/ERK kinase kinase 4) (MEK kinase 4) (MEKK 4)                                                    | Map3k4 (Mekk4)       | 37  | 16  | 19  | 23  |
| P49025 | Citron Rho-interacting kinase (CRIK) (EC 2.7.11.1) (Rho-interacting, serine/threonine-protein kinase 21)                                                              | Cit                  | 49  | 67  | 67  | 81  |
| Q6PDM2 | Splicing factor, arginine/serine-rich 1 (ASF/SF2)                                                                                                                     | Sfrs1                | 24  | 91  | 5   | 6   |
| Q60848 | Lymphocyte-specific helicase (EC 3.6.1.-) (Proliferation associated SNF2-like protein)                                                                                | Hells (Lsh) (Pasg)   | 37  | 35  | 10  | 12  |
| P80315 | T-complex protein 1 subunit delta (TCP-1-delta) (CCT-delta) (A45)                                                                                                     | Cct4 (Cctd)          | 61  | 59  | 15  | 18  |
| Q60575 | Kinesin-like protein KIF1B                                                                                                                                            | Kif1b                | 45  | 95  | 30  | 36  |
| O08810 | 116 kDa U5 small nuclear ribonucleoprotein component (U5 snRNP-specific protein, 116 kDa) (U5-116 kDa) (Elongation factor Tu GTP-binding domain-containing protein 2) | Eftud2 (Snrp116)     | 80  | 68  | 21  | 25  |
| Q61771 | Kinesin-like protein KIF3B (Microtubule plus end-directed kinesin motor 3B)                                                                                           | Kif3b                | 30  | 51  | 16  | 19  |
| Q9R0K7 | Plasma membrane calcium-transporting ATPase 2 (PMCA2) (EC 3.6.3.8) (Plasma membrane calcium ATPase isoform 2) (Plasma membrane calcium pump isoform 2)                | Atp2b2 (Pmca2)       | 32  | 27  | 70  | 83  |
| P80313 | T-complex protein 1 subunit eta (TCP-1-eta) (CCT-eta)                                                                                                                 | Cct7 (Ccth)          | 49  | 50  | 11  | 13  |
| Q8C3X4 | GTP-binding protein GUF1 homolog                                                                                                                                      | Guf1                 | 311 | 506 | 412 | 483 |
| P49718 | DNA replication licensing factor MCM5 (CDC46 homolog) (P1-CDC46)                                                                                                      | Mcm5 (Cdc46) (Mcmd5) | 40  | 20  | 18  | 21  |

|        |                                                                                                                                                                                            |                                    |      |      |     |     |
|--------|--------------------------------------------------------------------------------------------------------------------------------------------------------------------------------------------|------------------------------------|------|------|-----|-----|
| P97820 | Mitogen-activated protein kinase kinase kinase kinase 4 (EC 2.7.11.1) (MAPK/ERK kinase kinase kinase 4) (MEK kinase kinase 4) (MEKKK 4) (HPK/GCK-like kinase HGK) (Nck-interacting kinase) | Map4k4 (Nik)                       | 65   | 54   | 15  | 17  |
| Q9WUU9 | 80 kDa MCM3-associated protein (Protein GANP)                                                                                                                                              | Mcm3ap (Ganp) (Map80)              | 48   | 32   | 17  | 19  |
| P26618 | Alpha-type platelet-derived growth factor receptor (EC 2.7.10.1) (PDGF-R-alpha) (CD140 antigen-like family member A) (CD antigen CD140a)                                                   | Pdgfra                             | 37   | 73   | 160 | 178 |
| P62631 | Elongation factor 1-alpha 2 (EF-1-alpha-2) (Elongation factor 1 A-2) (eEF1A-2) (Statin S1)                                                                                                 | Eef1a2 (Eef1a) (Str)               | 1275 | 1549 | 258 | 285 |
| P49717 | DNA replication licensing factor MCM4 (CDC21 homolog) (P1-CDC21)                                                                                                                           | Mcm4 (Cdc21) (Mcmd4)               | 29   | 18   | 11  | 12  |
| Q3THS6 | S-adenosylmethionine synthetase isoform type 2 (AdoMet synthetase 2) (EC 2.5.1.6) (Methionine adenosyltransferase 2)                                                                       | Mat2a                              | 26   | 42   | 11  | 12  |
| Q9QUI0 | Transforming protein RhoA                                                                                                                                                                  | Rhoa (Arha) (Arha2)                | 117  | 231  | 11  | 12  |
| Q99KK9 | Probable histidyl-tRNA synthetase, mitochondrial (EC 6.1.1.21) (Histidine--tRNA ligase) (HisRS) (Histidine--tRNA ligase-like)                                                              | Hars2 (Harsl)                      | 20   | 41   | 22  | 24  |
| P07901 | Heat shock protein HSP 90-alpha (HSP 86) (Tumor-specific transplantation 86 kDa antigen) (TSTA)                                                                                            | Hsp90aa1 (Hsp86) (Hsp86-1) (Hspca) | 1529 | 2324 | 134 | 146 |
| P38647 | Stress-70 protein, mitochondrial (75 kDa glucose-regulated protein) (GRP 75) (Heat shock 70 kDa protein 9) (Peptide-binding protein 74) (PBP74) (P66 MOT) (Mortalin)                       | Hspa9 (Grp75) (Hsp74) (Hspa9a)     | 33   | 33   | 12  | 13  |

|        |                                                                                                                                                                                                                                       |                                    |      |      |     |     |
|--------|---------------------------------------------------------------------------------------------------------------------------------------------------------------------------------------------------------------------------------------|------------------------------------|------|------|-----|-----|
| P10126 | Elongation factor 1-alpha 1 (EF-1-alpha-1) (Elongation factor 1 A-1) (eEF1A-1) (Elongation factor Tu) (EF-Tu)                                                                                                                         | Eef1a1 (Eef1a)                     | 2004 | 2344 | 305 | 330 |
| P08113 | Endoplasmic reticulum chaperone protein (Heat shock protein 90 kDa beta member 1) (94 kDa glucose-regulated protein) (GRP94) (ERP99) (Polymorphic tumor rejection antigen 1) (Tumor rejection antigen gp96)                           | Hsp90b1 (Tra-1) (Tra1)             | 221  | 298  | 25  | 27  |
| Q9Z104 | SWI/SNF-related matrix-associated actin-dependent regulator of chromatin subfamily E member 1-related (SMARCE1-related protein) (HMG box-containing protein 20B) (Structural DNA-binding protein BRAF35) (BRCA2-associated factor 35) | Hmg20b (Braf35) (Hmgx2) (Smarce1r) | 30   | 20   | 14  | 15  |
| P11984 | T-complex protein 1 subunit alpha A (TCP-1-alpha) (CCT-alpha) (Tailless complex polypeptide 1A) (TCP-1-A)                                                                                                                             | Cct1 (Ccta) (Tcp1)                 | 29   | 66   | 14  | 15  |
| Q3TY86 | Apoptosis-inducing factor 3 (EC 1.-.-.-) (Apoptosis-inducing factor-like protein)                                                                                                                                                     | Aifm3 (Aifl)                       | 42   | 26   | 28  | 30  |
| Q61820 | GTP-binding nuclear protein Ran, testis-specific isoform                                                                                                                                                                              | Rasl2-9                            | 564  | 570  | 23  | 24  |
| Q62504 | Msx2-interacting protein (SPEN homolog) (SMART/HDAC1-associated repressor protein)                                                                                                                                                    | Spen (Kiaa0929) (Mint) (Sharp)     | 27   | 18   | 72  | 75  |
| P12367 | cAMP-dependent protein kinase type II-alpha regulatory subunit                                                                                                                                                                        | Prkar2a                            | 33   | 23   | 5   | 5   |
| P30416 | FK506-binding protein 4 (EC 5.2.1.8) (Peptidyl-prolyl cis-trans isomerase) (PPIase) (Rotamase) (HSP-binding immunophilin) (HBI) (FKBP52 protein) (52 kDa FK506-binding protein) (FKBP59) (p59 protein)                                | Fkbp4                              | 40   | 62   | 8   | 8   |
| Q8C0N1 | Kinesin-like protein KIF2B                                                                                                                                                                                                            | Kif2b                              | 17   | 26   | 8   | 8   |
| Q80YV4 | Pantothenate kinase 4 (EC 2.7.1.33) (Pantothenic acid kinase 4) (mPanK4)                                                                                                                                                              | Pank4                              | 23   | 28   | 13  | 13  |

|        |                                                                                                                                                                                                              |                                                 |      |      |     |     |
|--------|--------------------------------------------------------------------------------------------------------------------------------------------------------------------------------------------------------------|-------------------------------------------------|------|------|-----|-----|
| P25206 | DNA replication licensing factor MCM3 (DNA polymerase alpha holoenzyme-associated protein P1) (P1-MCM3)                                                                                                      | Mcm3 (Mcmd)<br>(Mcmd3)                          | 74   | 185  | 15  | 15  |
| Q8R4K2 | Interleukin-1 receptor-associated kinase 4 (IRAK-4) (EC 2.7.11.1)                                                                                                                                            | Irak4                                           | 32   | 47   | 22  | 22  |
| Q6P8J7 | Creatine kinase, sarcomeric mitochondrial (EC 2.7.3.2) (S-MtCK)                                                                                                                                              | Ckmt2                                           | 50   | 66   | 26  | 26  |
| P11499 | Heat shock protein HSP 90-beta (HSP 84) (Tumor-specific transplantation 84 kDa antigen) (TSTA)                                                                                                               | Hsp90ab1<br>(Hsp84)<br>(Hsp84-1)<br>(Hspcb)     | 2943 | 3523 | 208 | 205 |
| P58252 | Elongation factor 2 (EF-2)                                                                                                                                                                                   | Eef2                                            | 1630 | 1718 | 128 | 126 |
| O08638 | Myosin-11 (Myosin heavy chain 11) (Myosin heavy chain, smooth muscle isoform) (SMMHC)                                                                                                                        | Myh11                                           | 211  | 221  | 79  | 76  |
| Q9QXL1 | Kinesin-like protein KIF21B (Kinesin-like protein KIF6)                                                                                                                                                      | Kif21b (Kif6)                                   | 22   | 45   | 26  | 25  |
| Q8R4B8 | NACHT, LRR and PYD domains-containing protein 3 (Cold autoinflammatory syndrome 1 protein homolog) (Cryopyrin) (PYRIN-containing APAF1-like protein 1) (Mast cell maturation-associated-inducible protein 1) | Nlrp3 (Cias1)<br>(Mmig1)<br>(Nalp3)<br>(Pypaf1) | 30   | 20   | 24  | 23  |
| Q8BGQ7 | Alanyl-tRNA synthetase, cytoplasmic (EC 6.1.1.7) (Alanine--tRNA ligase) (AlaRS)                                                                                                                              | Aars                                            | 179  | 216  | 23  | 22  |
| Q91V92 | ATP-citrate synthase (EC 2.3.3.8) (ATP-citrate (pro-S)-lyase) (Citrate cleavage enzyme)                                                                                                                      | Acly                                            | 349  | 488  | 45  | 43  |
| Q61768 | Kinesin-1 heavy chain (Ubiquitous kinesin heavy chain) (UKHC) (Conventional kinesin heavy chain)                                                                                                             | Kif5b (Khcs)<br>(Kns1)                          | 102  | 303  | 43  | 41  |
| P62827 | GTP-binding nuclear protein Ran (GTPase Ran) (Ras-related nuclear protein) (Ras-like protein TC4)                                                                                                            | Ran (Rasl2-8)                                   | 756  | 656  | 38  | 36  |
| P30275 | Creatine kinase, ubiquitous mitochondrial (EC 2.7.3.2) (U-MtCK) (Acidic-type mitochondrial creatine kinase) (Mia-CK)                                                                                         | Ckmt1                                           | 205  | 121  | 32  | 30  |

|        |                                                                                                                                                                                                                     |                                    |      |      |     |     |
|--------|---------------------------------------------------------------------------------------------------------------------------------------------------------------------------------------------------------------------|------------------------------------|------|------|-----|-----|
| Q04447 | Creatine kinase B-type (EC 2.7.3.2) (Creatine kinase B chain) (B-CK)                                                                                                                                                | Ckb (Ckbb)                         | 9079 | 7277 | 434 | 406 |
| Q8CGC6 | RNA-binding protein 28 (RNA-binding motif protein 28)                                                                                                                                                               | Rbm28                              | 24   | 41   | 71  | 66  |
| P35969 | Vascular endothelial growth factor receptor 1 (VEGFR-1) (EC 2.7.10.1) (Tyrosine-protein kinase receptor FLT) (FLT-1) (Embryonic receptor kinase 2)                                                                  | Flt1 (Emrk2) (Flt)                 | 29   | 36   | 35  | 32  |
| Q01853 | Transitional endoplasmic reticulum ATPase (TER ATPase) (15S Mg(2+)-ATPase p97 subunit) (Valosin-containing protein) (VCP)                                                                                           | Vcp                                | 691  | 699  | 56  | 51  |
| Q8CGC7 | Bifunctional aminoacyl-tRNA synthetase [Includes: Glutamyl-tRNA synthetase (EC 6.1.1.17) (Glutamate--tRNA ligase); Prolyl-tRNA synthetase (EC 6.1.1.15) (Proline--tRNA ligase)]                                     | Eprs (Qprs)                        | 130  | 102  | 32  | 29  |
| Q8VDD5 | Myosin-9 (Myosin heavy chain 9) (Myosin heavy chain, non-muscle IIa) (Non-muscle myosin heavy chain IIa) (NMMHC II-a) (NMMHC-IIA) (Cellular myosin heavy chain, type A) (Non-muscle myosin heavy chain-A) (NMMHC-A) | Myh9                               | 780  | 839  | 127 | 115 |
| P07310 | Creatine kinase M-type (EC 2.7.3.2) (Creatine kinase M chain) (M-CK)                                                                                                                                                | Ckm (Ckmm)                         | 73   | 107  | 31  | 28  |
| Q9QZH3 | Peptidyl-prolyl cis-trans isomerase E (PPIase E) (Rotamase E) (EC 5.2.1.8) (Cyclophilin E) (Cyclophilin-33)                                                                                                         | Ppie (Cyp33)                       | 28   | 35   | 10  | 9   |
| Q99104 | Myosin-Va (Dilute myosin heavy chain, non-muscle)                                                                                                                                                                   | Myo5a (Dilute)                     | 28   | 34   | 35  | 31  |
| P33173 | Kinesin-like protein KIF1A (Axonal transporter of synaptic vesicles)                                                                                                                                                | Kif1a (Atsv) (Kif1)                | 45   | 108  | 25  | 22  |
| Q02053 | Ubiquitin-like modifier-activating enzyme 1 (Ubiquitin-activating enzyme E1) (Ubiquitin-like modifier-activating enzyme 1 X) (Ubiquitin-activating enzyme E1 X)                                                     | Uba1 (Sbx) (Ube1) (Ube1ax) (Ube1x) | 660  | 1086 | 63  | 55  |

|        |                                                                                                                                                                                                             |                           |     |     |    |    |
|--------|-------------------------------------------------------------------------------------------------------------------------------------------------------------------------------------------------------------|---------------------------|-----|-----|----|----|
| Q8VHE6 | Dynein heavy chain 5, axonemal (Axonemal beta dynein heavy chain 5) (Mdnah5) (Ciliary dynein heavy chain 5)                                                                                                 | Dnah5 (Dnahc5)            | 47  | 44  | 83 | 72 |
| Q9Z1Q9 | Valyl-tRNA synthetase (EC 6.1.1.9) (Valine--tRNA ligase) (ValRS) (Protein G7a)                                                                                                                              | Vars (Bat6) (G7a) (Vars2) | 380 | 302 | 37 | 32 |
| Q921E2 | Ras-related protein Rab-31                                                                                                                                                                                  | Rab31                     | 18  | 29  | 7  | 6  |
| O88866 | Hormonally up-regulated neu tumor-associated kinase (EC 2.7.11.1) (Serine/threonine-protein kinase MAK-V)                                                                                                   | Hunk (Makv)               | 27  | 21  | 14 | 12 |
| P97784 | Cryptochrome-1                                                                                                                                                                                              | Cry1                      | 52  | 42  | 21 | 18 |
| Q9R194 | Cryptochrome-2                                                                                                                                                                                              | Cry2 (Kiaa0658)           | 52  | 42  | 21 | 18 |
| Q9JM52 | Misshapen-like kinase 1 (EC 2.7.11.1) (Mitogen-activated protein kinase kinase kinase 6) (MAPK/ERK kinase kinase 6) (MEK kinase kinase 6) (MEKKK 6) (Misshapen/NIK-related kinase) (GCK family kinase MiNK) | Mink1 (Map4k6) (Mink)     | 18  | 54  | 13 | 11 |
| Q9CQN1 | Heat shock protein 75 kDa, mitochondrial (HSP 75) (Tumor necrosis factor type 1 receptor-associated protein) (TRAP-1) (TNFR-associated protein 1)                                                           | Trap1 (Hsp75)             | 197 | 335 | 13 | 11 |
| P20029 | 78 kDa glucose-regulated protein (GRP 78) (Heat shock 70 kDa protein 5) (Immunoglobulin heavy chain-binding protein) (BiP)                                                                                  | Hspa5 (Grp78)             | 262 | 312 | 25 | 21 |
| P46664 | Adenylosuccinate synthetase isozyme 2 (AMPSase 2) (AdSS 2) (EC 6.3.4.4) (Adenylosuccinate synthetase, non-muscle isozyme) (Adenylosuccinate synthetase, acidic isozyme) (IMP--aspartate ligase 2)           | Adss (Adss2)              | 36  | 66  | 12 | 10 |
| P11983 | T-complex protein 1 subunit alpha B (TCP-1-alpha) (CCT-alpha) (Tailless complex polypeptide 1B) (TCP-1-B)                                                                                                   | Cct1 (Ccta) (Tcp1)        | 29  | 66  | 18 | 15 |
| P09405 | Nucleolin (Protein C23)                                                                                                                                                                                     | Ncl (Nuc)                 | 775 | 872 | 78 | 65 |



|        |                                                                                                                                                                                                                                                                |                         |     |     |    |    |
|--------|----------------------------------------------------------------------------------------------------------------------------------------------------------------------------------------------------------------------------------------------------------------|-------------------------|-----|-----|----|----|
| Q91XQ0 | Dynein heavy chain 8, axonemal (Axonemal beta dynein heavy chain 8) (Ciliary dynein heavy chain 8)                                                                                                                                                             | Dnahc8                  | 47  | 51  | 77 | 64 |
| Q6URW6 | Myosin-14 (Myosin heavy chain 14) (Myosin heavy chain, non-muscle IIc) (Non-muscle myosin heavy chain IIc) (NMHC II-C)                                                                                                                                         | Myh14                   | 60  | 48  | 53 | 44 |
| Q8R429 | Sarcoplasmic/endoplasmic reticulum calcium ATPase 1 (SERCA1) (EC 3.6.3.8) (Calcium pump 1) (Calcium-transporting ATPase sarcoplasmic reticulum type, fast twitch skeletal muscle isoform) (SR Ca(2+)-ATPase 1) (Endoplasmic reticulum class 1/2 Ca(2+) ATPase) | Atp2a1                  | 25  | 17  | 17 | 14 |
| P80316 | T-complex protein 1 subunit epsilon (TCP-1-epsilon) (CCT-epsilon)                                                                                                                                                                                              | Cct5 (Ccte) (Kiaa0098)  | 239 | 102 | 17 | 14 |
| Q569Z5 | Probable ATP-dependent RNA helicase DDX46 (EC 3.6.1.-) (DEAD box protein 46)                                                                                                                                                                                   | Ddx46 (Kiaa0801)        | 25  | 17  | 21 | 17 |
| Q80ZW0 | Serine/threonine-protein kinase 35 (EC 2.7.11.1)                                                                                                                                                                                                               | Stk35                   | 14  | 50  | 21 | 17 |
| Q921J2 | GTP-binding protein Rheb (Ras homolog enriched in brain)                                                                                                                                                                                                       | Rheb                    | 21  | 44  | 31 | 25 |
| Q62407 | Striated muscle-specific serine/threonine protein kinase (EC 2.7.11.1) (Aortic preferentially expressed protein 1) (APEG-1)                                                                                                                                    | Speg (Apeg1) (Kiaa1297) | 26  | 20  | 31 | 25 |
| Q8VI47 | Canalicular multispecific organic anion transporter 1 (ATP-binding cassette sub-family C member 2)                                                                                                                                                             | Abcc2                   | 31  | 38  | 39 | 31 |
| Q8C196 | Carbamoyl-phosphate synthase [ammonia], mitochondrial (EC 6.3.4.16) (Carbamoyl-phosphate synthetase I) (CPSase I)                                                                                                                                              | Cps1                    | 22  | 25  | 19 | 15 |
| Q80UN9 | tRNA isopentenyltransferase, mitochondrial (IPTase) (EC 2.5.1.8) (Isopentenyl-diphosphate:tRNA isopentenyltransferase) (IPP transferase) (IPPT)                                                                                                                | Trit1 (Ipt)             | 31  | 24  | 19 | 15 |

|        |                                                                                                                                                                                                                            |                                        |     |     |     |     |
|--------|----------------------------------------------------------------------------------------------------------------------------------------------------------------------------------------------------------------------------|----------------------------------------|-----|-----|-----|-----|
| Q8CIQ7 | Dedicator of cytokinesis protein 3 (Modifier of cell adhesion) (Presenilin-binding protein) (PBP)                                                                                                                          | Dock3 (Moca)                           | 80  | 56  | 33  | 26  |
| Q9JHU4 | Cytoplasmic dynein 1 heavy chain 1 (Cytoplasmic dynein heavy chain 1) (Dynein heavy chain, cytosolic)                                                                                                                      | Dync1h1 (Dhc1) (Dnch1) (Dnchc1) (Dyhc) | 822 | 395 | 157 | 123 |
| P31254 | Ubiquitin-like modifier-activating enzyme 1 Y (Ubiquitin-activating enzyme E1 Y) (Ubiquitin-activating enzyme E1)                                                                                                          | Ube1ay (Sby) (Ube1y) (Ube1y1)          | 161 | 77  | 22  | 17  |
| Q8CGK3 | Lon protease homolog, mitochondrial (EC 3.4.21.-) (Lon protease-like protein) (LONP) (Mitochondrial ATP-dependent protease Lon) (Serine protease 15)                                                                       | Lonp1 (Prss15)                         | 21  | 30  | 43  | 33  |
| Q8JZQ2 | AFG3-like protein 2 (EC 3.4.24.-)                                                                                                                                                                                          | Afg3l2                                 | 15  | 27  | 17  | 13  |
| Q569Z6 | Thyroid hormone receptor-associated protein 3 (Thyroid hormone receptor-associated protein complex 150 kDa component) (Trap150)                                                                                            | Thrap3 (Trap150)                       | 29  | 48  | 21  | 16  |
| P16627 | Heat shock 70 kDa protein 1L (Heat shock 70 kDa protein 1-like) (Heat shock 70 kDa-like protein 1) (Spermatid-specific heat shock protein 70)                                                                              | Hspa1l (Hsc70t)                        | 319 | 238 | 33  | 25  |
| O70228 | Probable phospholipid-transporting ATPase IIA (EC 3.6.3.1) (ATPase class II type 9A)                                                                                                                                       | Atp9a                                  | 31  | 29  | 37  | 28  |
| P56480 | ATP synthase subunit beta, mitochondrial (EC 3.6.3.14)                                                                                                                                                                     | Atp5b                                  | 31  | 50  | 8   | 6   |
| Q02956 | Protein kinase C zeta type (EC 2.7.11.13) (nPKC-zeta)                                                                                                                                                                      | Prkcz (PkcZ)                           | 29  | 15  | 8   | 6   |
| Q9DBP5 | UMP-CMP kinase (EC 2.7.4.14) (Cytidylate kinase) (Deoxycytidylate kinase) (Cytidine monophosphate kinase) (Uridine monophosphate kinase) (Uridine monophosphate/cytidine monophosphate kinase) (UMP/CMP kinase) (UMP/CMPK) | Cmpk1 (Cmk) (Cmpk) (Uck) (Umk) (Umpk)  | 107 | 93  | 12  | 9   |

|        |                                                                                                                                                                                                                                 |                                          |      |      |     |     |
|--------|---------------------------------------------------------------------------------------------------------------------------------------------------------------------------------------------------------------------------------|------------------------------------------|------|------|-----|-----|
| P62751 | 60S ribosomal protein L23a                                                                                                                                                                                                      | Rpl23a                                   | 75   | 49   | 16  | 12  |
| Q8K045 | Serine/threonine-protein kinase N3 (EC 2.7.11.13) (Protein kinase PKN-beta) (Protein-kinase C-related kinase 3)                                                                                                                 | Pkn3 (Pknbeta)                           | 130  | 126  | 36  | 27  |
| P60710 | Actin, cytoplasmic 1 (Beta-actin)                                                                                                                                                                                               | Actb                                     | 5140 | 4496 | 282 | 208 |
| Q61656 | Probable ATP-dependent RNA helicase DDX5 (EC 3.6.1.-) (DEAD box protein 5) (RNA helicase p68) (DEAD box RNA helicase DEAD1) (mDEAD1)                                                                                            | Ddx5 (Tnz2)                              | 90   | 43   | 11  | 8   |
| Q61696 | Heat shock 70 kDa protein 1A (Heat shock 70 kDa protein 3) (HSP70.3) (Hsp68)                                                                                                                                                    | Hspa1a (Hsp70-3) (Hsp70A1)               | 266  | 236  | 33  | 24  |
| Q61699 | Heat shock protein 105 kDa (Heat shock-related 100 kDa protein E7I) (HSP-E7I) (Heat shock 110 kDa protein) (42 degrees C-HSP)                                                                                                   | Hsph1 (Hsp105) (Hsp110) (Kiaa0201)       | 46   | 48   | 18  | 13  |
| Q8BMJ2 | Leucyl-tRNA synthetase, cytoplasmic (EC 6.1.1.4) (Leucine--tRNA ligase) (LeuRS)                                                                                                                                                 | Lars                                     | 52   | 45   | 47  | 33  |
| P61294 | Ras-related protein Rab-6B                                                                                                                                                                                                      | Rab6b (D9Bwg0185e)                       | 18   | 53   | 10  | 7   |
| Q91YJ5 | Translation initiation factor IF-2, mitochondrial (IF-2Mt) (IF2(mt)) (IF-2(Mt))                                                                                                                                                 | Mtif2                                    | 29   | 23   | 13  | 9   |
| Q64707 | U2 small nuclear ribonucleoprotein auxiliary factor 35 kDa subunit-related protein 1 (U2(RNU2) small nuclear RNA auxiliary factor 1-like 1) (CCCH type zinc finger, RNA-binding motif and serine/arginine rich protein 1) (SP2) | Zrsr1 (Sp2) (Sp2-7) (U2af1rs1) (U2af111) | 34   | 22   | 13  | 9   |
| Q9CWF2 | Tubulin beta-2B chain                                                                                                                                                                                                           | Tubb2b                                   | 1435 | 825  | 86  | 59  |
| P99024 | Tubulin beta-5 chain                                                                                                                                                                                                            | Tubb5                                    | 1377 | 976  | 88  | 60  |
| Q6PHN9 | Ras-related protein Rab-35                                                                                                                                                                                                      | Rab35                                    | 17   | 59   | 3   | 2   |
| P61164 | Alpha-centractin (Centractin) (Centrosome-associated actin homolog) (Actin-RPV) (ARP1)                                                                                                                                          | Actr1a (Ctrn1)                           | 247  | 124  | 27  | 18  |

|        |                                                                                                                                                                                                                               |                              |      |      |     |     |
|--------|-------------------------------------------------------------------------------------------------------------------------------------------------------------------------------------------------------------------------------|------------------------------|------|------|-----|-----|
| P68033 | Actin, alpha cardiac muscle 1 (Alpha-cardiac actin)                                                                                                                                                                           | Actc1 (Actc)                 | 3948 | 2726 | 234 | 155 |
| P68372 | Tubulin beta-2C chain                                                                                                                                                                                                         | Tubb2c                       | 1300 | 891  | 78  | 51  |
| P42932 | T-complex protein 1 subunit theta (TCP-1-theta) (CCT-theta)                                                                                                                                                                   | Cct8 (Cctq)                  | 197  | 57   | 23  | 15  |
| P61161 | Actin-related protein 2 (Actin-like protein 2)                                                                                                                                                                                | Actr2 (Arp2)                 | 247  | 124  | 28  | 18  |
| Q8CG48 | Structural maintenance of chromosomes protein 2 (Chromosome-associated protein E) (XCAP-E homolog) (FGF-inducible protein 16)                                                                                                 | Smc2 (Cape) (Fin16) (Smc2l1) | 32   | 36   | 41  | 26  |
| Q7TMM9 | Tubulin beta-2A chain                                                                                                                                                                                                         | Tubb2a (Tubb2)               | 1422 | 775  | 83  | 52  |
| Q8C7H1 | Methylmalonic aciduria type A homolog, mitochondrial                                                                                                                                                                          | Mmaa                         | 31   | 37   | 16  | 10  |
| P17156 | Heat shock-related 70 kDa protein 2 (Heat shock protein 70.2)                                                                                                                                                                 | Hspa2 (Hcp70.2) (Hsp70-2)    | 964  | 544  | 60  | 37  |
| Q61879 | Myosin-10 (Myosin heavy chain 10) (Myosin heavy chain, non-muscle IIb) (Non-muscle myosin heavy chain IIb) (NMMHC II-b) (NMMHC-IIB) (Cellular myosin heavy chain, type B) (Non-muscle myosin heavy chain-B) (NMMHC-B)         | Myh10                        | 122  | 101  | 65  | 40  |
| Q9Z0P5 | Twinfilin-2 (Twinfilin-1-like protein) (A6-related protein) (mA6RP)                                                                                                                                                           | Twf2 (Ptk9l)                 | 29   | 32   | 10  | 6   |
| Q9QWK5 | Baculoviral IAP repeat-containing protein 1a (Neuronal apoptosis inhibitory protein 1)                                                                                                                                        | Naip1 (Birc1a) (Naip)        | 21   | 28   | 20  | 12  |
| Q9EQZ6 | Rap guanine nucleotide exchange factor 4 (cAMP-regulated guanine nucleotide exchange factor II) (cAMP-GEFII) (Exchange factor directly activated by cAMP 2) (Epac 2) (cAMP-dependent Rap1 guanine-nucleotide exchange factor) | Rapgef4 (Cgef2) (Epac2)      | 47   | 23   | 20  | 12  |

|        |                                                                                                                                                                                                                                     |                             |      |     |     |    |
|--------|-------------------------------------------------------------------------------------------------------------------------------------------------------------------------------------------------------------------------------------|-----------------------------|------|-----|-----|----|
| P63038 | 60 kDa heat shock protein, mitochondrial (Heat shock protein 60) (HSP-60) (Hsp60) (60 kDa chaperonin) (Chaperonin 60) (CPN60) (Mitochondrial matrix protein P1) (HSP-65)                                                            | Hspd1 (Hsp60)               | 15   | 32  | 22  | 13 |
| P80317 | T-complex protein 1 subunit zeta (TCP-1-zeta) (CCT-zeta) (CCT-zeta-1)                                                                                                                                                               | Cct6a (Cct6) (Cctz) (Cctz1) | 160  | 52  | 22  | 13 |
| P10630 | Eukaryotic initiation factor 4A-II (eIF-4A-II) (eIF4A-II) (EC 3.6.1.-) (ATP-dependent RNA helicase eIF4A-2)                                                                                                                         | Eif4a2 (Ddx2b)              | 194  | 78  | 17  | 10 |
| P09041 | Phosphoglycerate kinase 2 (EC 2.7.2.3) (Phosphoglycerate kinase, testis specific)                                                                                                                                                   | Pgk2 (Pkg-2)                | 162  | 73  | 17  | 10 |
| P63017 | Heat shock cognate 71 kDa protein (Heat shock 70 kDa protein 8)                                                                                                                                                                     | Hspa8 (Hsc70) (Hsc73)       | 1719 | 959 | 119 | 70 |
| P05532 | Mast/stem cell growth factor receptor (SCFR) (EC 2.7.10.1) (Proto-oncogene tyrosine-protein kinase Kit) (c-kit) (CD antigen CD117)                                                                                                  | Kit (SI)                    | 16   | 35  | 12  | 7  |
| Q9QUK4 | Baculoviral IAP repeat-containing protein 1b (Neuronal apoptosis inhibitory protein 2)                                                                                                                                              | Naip2 (Birc1b) (Naip-rs6)   | 21   | 28  | 14  | 8  |
| Q8K2I9 | F-box only protein 18 (EC 3.6.1.-) (F-box DNA helicase 1)                                                                                                                                                                           | Fbxo18 (Fbh1) (Fbx18)       | 30   | 23  | 9   | 5  |
| Q8BYH8 | Chromodomain-helicase-DNA-binding protein 9 (CHD-9) (EC 3.6.1.-) (ATP-dependent helicase CHD9) (Peroxisomal proliferator-activated receptor A-interacting complex 320 kDa protein) (PPAR-alpha-interacting complex protein 320 kDa) | Chd9 (Kiaa0308) (Pric320)   | 39   | 27  | 49  | 27 |
| Q9WTU3 | Sodium channel protein type 8 subunit alpha (Sodium channel protein type VIII subunit alpha) (Voltage-gated sodium channel subunit alpha Nav1.6)                                                                                    | Scn8a (Nbna1)               | 28   | 19  | 20  | 11 |

|                                    |                            |                                                                                                                           |                            |     |     |    |    |
|------------------------------------|----------------------------|---------------------------------------------------------------------------------------------------------------------------|----------------------------|-----|-----|----|----|
|                                    | Q9D6F9                     | Tubulin beta-4 chain                                                                                                      | Tubb4                      | 888 | 493 | 58 | 31 |
|                                    | Q61390                     | T-complex protein 1 subunit zeta-2 (TCP-1-zeta-2) (CCT-zeta-2) (Cctz-2)                                                   | Cct6b                      | 55  | 52  | 15 | 8  |
|                                    | Q922F4                     | Tubulin beta-6 chain                                                                                                      | Tubb6                      | 583 | 382 | 40 | 21 |
|                                    | Q9ERD7                     | Tubulin beta-3 chain                                                                                                      | Tubb3                      | 780 | 383 | 52 | 27 |
|                                    | Q80UE6                     | Serine/threonine-protein kinase WNK4 (EC 2.7.11.1) (Protein kinase with no lysine 4) (Protein kinase, lysine-deficient 4) | Wnk4 (Prkwnk4)             | 23  | 33  | 29 | 15 |
| structural constituent of ribosome | P35980                     | 60S ribosomal protein L18                                                                                                 | Rpl18                      | 32  | 22  | 51 | 85 |
|                                    | P62082                     | 40S ribosomal protein S7                                                                                                  | Rps7                       | 104 | 126 | 9  | 14 |
|                                    | O55142                     | 60S ribosomal protein L35a                                                                                                | Rpl35a                     | 24  | 50  | 4  | 6  |
|                                    | P62270                     | 40S ribosomal protein S18 (Ke-3) (Ke3)                                                                                    | Rps18                      | 210 | 209 | 15 | 17 |
|                                    | P62908                     | 40S ribosomal protein S3                                                                                                  | Rps3                       | 778 | 762 | 39 | 44 |
|                                    | P19253                     | 60S ribosomal protein L13a (Transplantation antigen P198) (Tum-P198 antigen)                                              | Rpl13a (P198) (Tstap198-7) | 27  | 65  | 9  | 10 |
|                                    | P62242                     | 40S ribosomal protein S8                                                                                                  | Rps8                       | 479 | 372 | 18 | 19 |
|                                    | P62281                     | 40S ribosomal protein S11                                                                                                 | Rps11                      | 166 | 132 | 27 | 28 |
|                                    | Q9CPR4                     | 60S ribosomal protein L17                                                                                                 | Rpl17                      | 187 | 135 | 15 | 14 |
|                                    | P67984                     | 60S ribosomal protein L22 (Heparin-binding protein HBp15)                                                                 | Rpl22                      | 59  | 48  | 7  | 6  |
|                                    | P35979                     | 60S ribosomal protein L12                                                                                                 | Rpl12                      | 208 | 389 | 14 | 12 |
|                                    | Q9CZM2                     | 60S ribosomal protein L15                                                                                                 | Rpl15                      | 225 | 107 | 21 | 18 |
|                                    | Q6ZWN5                     | 40S ribosomal protein S9                                                                                                  | Rps9                       | 459 | 248 | 47 | 40 |
|                                    | P14131                     | 40S ribosomal protein S16                                                                                                 | Rps16                      | 160 | 126 | 19 | 16 |
|                                    | P14206                     | 40S ribosomal protein SA (Laminin receptor 1) (p40) (34/67 kDa laminin receptor) (37 kDa oncofetal antigen) (OFA/iLRP)    | Rpsa (Lamr1) (P40-8)       | 131 | 112 | 11 | 9  |
|                                    | P12970                     | 60S ribosomal protein L7a (Surfeit locus protein 3)                                                                       | Rpl7a (Surf-3) (Surf3)     | 111 | 31  | 15 | 12 |
|                                    | Q8BP67                     | 60S ribosomal protein L24                                                                                                 | Rpl24                      | 354 | 214 | 24 | 19 |
|                                    | P62754                     | 40S ribosomal protein S6 (Phosphoprotein NP33)                                                                            | Rps6                       | 127 | 283 | 19 | 15 |
|                                    | P63325                     | 40S ribosomal protein S10                                                                                                 | Rps10                      | 468 | 168 | 42 | 33 |
|                                    | P62702                     | 40S ribosomal protein S4, X isoform                                                                                       | Rps4x (Rps4)               | 402 | 304 | 30 | 23 |
| P62751                             | 60S ribosomal protein L23a | Rpl23a                                                                                                                    | 75                         | 49  | 16  | 12 |    |

|                        |        |                                                                                                                                                                    |                                                   |     |     |    |    |
|------------------------|--------|--------------------------------------------------------------------------------------------------------------------------------------------------------------------|---------------------------------------------------|-----|-----|----|----|
|                        | P62264 | 40S ribosomal protein S14                                                                                                                                          | Rps14                                             | 163 | 166 | 15 | 11 |
|                        | P25444 | 40S ribosomal protein S2 (S4) (LLRep3 protein)                                                                                                                     | Rps2 (Llrep3) (Rps4)                              | 217 | 50  | 26 | 19 |
|                        | P62991 | Ubiquitin                                                                                                                                                          | Rps27a (Uba80) (Ubcep1); Uba52 (Ubcep2); Ubb; Ubc | 61  | 54  | 11 | 8  |
|                        | Q9CR57 | 60S ribosomal protein L14                                                                                                                                          | Rpl14                                             | 508 | 391 | 33 | 24 |
|                        | P27659 | 60S ribosomal protein L3 (J1 protein)                                                                                                                              | Rpl3                                              | 192 | 75  | 25 | 18 |
|                        | P14148 | 60S ribosomal protein L7                                                                                                                                           | Rpl7                                              | 145 | 52  | 14 | 10 |
|                        | P14869 | 60S acidic ribosomal protein P0 (L10E)                                                                                                                             | Rplp0 (Arbp)                                      | 115 | 334 | 28 | 20 |
|                        | P51410 | 60S ribosomal protein L9                                                                                                                                           | Rpl9                                              | 187 | 212 | 17 | 12 |
|                        | Q9CXW4 | 60S ribosomal protein L11                                                                                                                                          | Rpl11                                             | 72  | 79  | 11 | 7  |
|                        | P62717 | 60S ribosomal protein L18a                                                                                                                                         | Rpl18a                                            | 242 | 62  | 21 | 13 |
|                        | P84099 | 60S ribosomal protein L19                                                                                                                                          | Rpl19                                             | 39  | 47  | 13 | 8  |
|                        | P62301 | 40S ribosomal protein S13                                                                                                                                          | Rps13                                             | 77  | 100 | 23 | 14 |
|                        | Q9D1R9 | 60S ribosomal protein L34                                                                                                                                          | Rpl34                                             | 34  | 32  | 10 | 6  |
|                        | P62900 | 60S ribosomal protein L31                                                                                                                                          | Rpl31                                             | 124 | 62  | 12 | 7  |
|                        | P41105 | 60S ribosomal protein L28                                                                                                                                          | Rpl28                                             | 49  | 41  | 19 | 11 |
|                        | Q9CZX8 | 40S ribosomal protein S19                                                                                                                                          | Rps19                                             | 206 | 146 | 19 | 11 |
|                        | P47963 | 60S ribosomal protein L13 (A52)                                                                                                                                    | Rpl13                                             | 744 | 379 | 47 | 27 |
|                        | P97461 | 40S ribosomal protein S5                                                                                                                                           | Rps5                                              | 89  | 33  | 32 | 18 |
|                        | P97351 | 40S ribosomal protein S3a                                                                                                                                          | Rps3a                                             | 899 | 392 | 50 | 26 |
| endopeptidase activity | Q8BHG1 | Nardilysin (EC 3.4.24.61) (N-arginine dibasic convertase) (NRD convertase) (NRD-C)                                                                                 | Nrd1                                              | 53  | 54  | 13 | 21 |
|                        | P99026 | Proteasome subunit beta type-4 (Proteasome beta chain) (EC 3.4.25.1) (Macropain beta chain) (Multicatalytic endopeptidase complex beta chain) (Proteasome chain 3) | Psmb4 (Lmp3)                                      | 93  | 289 | 11 | 16 |

|        |                                                                                                                                                                                                                       |              |     |     |    |    |
|--------|-----------------------------------------------------------------------------------------------------------------------------------------------------------------------------------------------------------------------|--------------|-----|-----|----|----|
| Q9R1P0 | Proteasome subunit alpha type-4 (EC 3.4.25.1) (Proteasome component C9) (Macropain subunit C9) (Multicatalytic endopeptidase complex subunit C9) (Proteasome subunit L)                                               | Psma4        | 29  | 151 | 14 | 17 |
| Q9QUR6 | Prolyl endopeptidase (PE) (EC 3.4.21.26) (Post-proline cleaving enzyme)                                                                                                                                               | Prep (Pep)   | 56  | 20  | 15 | 18 |
| Q6A4J8 | Ubiquitin carboxyl-terminal hydrolase 7 (EC 3.1.2.15) (Ubiquitin thioesterase 7) (Ubiquitin-specific-processing protease 7) (Deubiquitinating enzyme 7) (Herpesvirus-associated ubiquitin-specific protease) (mHAUSP) | Usp7 (Hausp) | 27  | 18  | 14 | 16 |
| O55234 | Proteasome subunit beta type-5 (EC 3.4.25.1) (Proteasome epsilon chain) (Macropain epsilon chain) (Multicatalytic endopeptidase complex epsilon chain) (Proteasome subunit X) (Proteasome chain 6)                    | Psmb5        | 168 | 227 | 10 | 11 |
| Q9R1P1 | Proteasome subunit beta type-3 (EC 3.4.25.1) (Proteasome theta chain) (Proteasome chain 13) (Proteasome component C10-II)                                                                                             | Psmb3        | 87  | 135 | 7  | 7  |
| O09061 | Proteasome subunit beta type-1 (EC 3.4.25.1) (Proteasome component C5) (Macropain subunit C5) (Multicatalytic endopeptidase complex subunit C5) (Proteasome gamma chain)                                              | Psmb1        | 84  | 94  | 11 | 11 |
| Q9DB77 | Cytochrome b-c1 complex subunit 2, mitochondrial (Ubiquinol-cytochrome-c reductase complex core protein 2) (Core protein II) (Complex III subunit 2)                                                                  | Uqcrc2       | 29  | 20  | 13 | 13 |



|        |                                                                                                                                                                                 |                                        |     |     |     |     |
|--------|---------------------------------------------------------------------------------------------------------------------------------------------------------------------------------|----------------------------------------|-----|-----|-----|-----|
| Q9WTR0 | Matrix metalloproteinase-16 (MMP-16) (EC 3.4.24.-) (Membrane-type matrix metalloproteinase 3) (MT-MMP 3) (MTMMP3) (Membrane-type-3 matrix metalloproteinase) (MT3-MMP) (MT3MMP) | Mmp16                                  | 17  | 36  | 11  | 10  |
| P70195 | Proteasome subunit beta type-7 (EC 3.4.25.1) (Proteasome subunit Z) (Macropain chain Z) (Multicatalytic endopeptidase complex chain Z)                                          | Psmb7 (Mmc14)                          | 39  | 40  | 8   | 7   |
| Q8VHE6 | Dynein heavy chain 5, axonemal (Axonemal beta dynein heavy chain 5) (Mdnah5) (Ciliary dynein heavy chain 5)                                                                     | Dnah5 (Dnahc5)                         | 47  | 44  | 83  | 72  |
| Q64514 | Tripeptidyl-peptidase 2 (EC 3.4.14.10) (Tripeptidyl-peptidase II) (TPP-II) (Tripeptidyl aminopeptidase)                                                                         | Tpp2                                   | 54  | 76  | 24  | 20  |
| Q91XQ0 | Dynein heavy chain 8, axonemal (Axonemal beta dynein heavy chain 8) (Ciliary dynein heavy chain 8)                                                                              | Dnahc8                                 | 47  | 51  | 77  | 64  |
| Q9Z2U0 | Proteasome subunit alpha type-7 (EC 3.4.25.1) (Proteasome subunit RC6-1)                                                                                                        | PsmA7                                  | 121 | 253 | 15  | 12  |
| Q9JHU4 | Cytoplasmic dynein 1 heavy chain 1 (Cytoplasmic dynein heavy chain 1) (Dynein heavy chain, cytosolic)                                                                           | Dync1h1 (Dhc1) (Dnch1) (Dnchc1) (Dyhc) | 822 | 395 | 157 | 123 |
| Q8CGK3 | Lon protease homolog, mitochondrial (EC 3.4.21.-) (Lon protease-like protein) (LONP) (Mitochondrial ATP-dependent protease Lon) (Serine protease 15)                            | Lonp1 (Prss15)                         | 21  | 30  | 43  | 33  |
| Q8JZQ2 | AFG3-like protein 2 (EC 3.4.24.-)                                                                                                                                               | Afg3l2                                 | 15  | 27  | 17  | 13  |
| Q9D8V0 | Minor histocompatibility antigen H13 (EC 3.4.23.-) (Signal peptide peptidase) (Presenilin-like protein 3)                                                                       | Hm13 (H13) (Psl3)                      | 23  | 29  | 28  | 21  |

|                 |        |                                                                                                                                                                                                  |                        |     |     |    |    |
|-----------------|--------|--------------------------------------------------------------------------------------------------------------------------------------------------------------------------------------------------|------------------------|-----|-----|----|----|
|                 | Q60692 | Proteasome subunit beta type-6 (EC 3.4.25.1) (Proteasome delta chain) (Macropain delta chain) (Multicatalytic endopeptidase complex delta chain) (Proteasome subunit Y)                          | Psmb6 (Lmp19)          | 33  | 89  | 17 | 12 |
|                 | Q8C9S8 | Cysteine protease ATG4A (EC 3.4.22.-) (Autophagy-related protein 4 homolog A) (Autophagin-2) (Autophagy-related cysteine endopeptidase 2) (AUT-like 2 cysteine endopeptidase)                    | Atg4a (Apg4a) (Autl2)  | 26  | 21  | 6  | 4  |
|                 | O70435 | Proteasome subunit alpha type-3 (EC 3.4.25.1) (Proteasome component C8) (Macropain subunit C8) (Multicatalytic endopeptidase complex subunit C8) (Proteasome subunit K)                          | Psma3                  | 95  | 76  | 14 | 9  |
|                 | Q80U87 | Ubiquitin carboxyl-terminal hydrolase 8 (EC 3.1.2.15) (Ubiquitin thioesterase 8) (Ubiquitin-specific-processing protease 8) (Deubiquitinating enzyme 8) (mUBPy)                                  | Usp8 (Kiaa0055) (Ubpy) | 29  | 23  | 24 | 15 |
|                 | Q8R4K8 | Pappalysin-1 (EC 3.4.24.79) (Pregnancy-associated plasma protein A) (PAPP-A) (Insulin-like growth factor-dependent IGF-binding protein 4 protease) (IGF-dependent IGFBP-4 protease) (IGFBP-4ase) | Pappa                  | 41  | 43  | 25 | 15 |
|                 | P49722 | Proteasome subunit alpha type-2 (EC 3.4.25.1) (Proteasome component C3) (Macropain subunit C3) (Multicatalytic endopeptidase complex subunit C3)                                                 | Psma2 (Lmpc3)          | 188 | 103 | 16 | 9  |
| protein binding | P97311 | DNA replication licensing factor MCM6 (Mis5 homolog)                                                                                                                                             | Mcm6 (Mcmd6) (Mis5)    | 110 | 395 | 20 | 38 |
|                 | O88705 | Potassium/sodium hyperpolarization-activated cyclic nucleotide-gated channel 3 (Hyperpolarization-activated cation channel 3) (HAC-3)                                                            | Hcn3 (Hac3)            | 75  | 67  | 8  | 15 |

|        |                                                                                                                                                                                                       |                       |     |      |    |     |
|--------|-------------------------------------------------------------------------------------------------------------------------------------------------------------------------------------------------------|-----------------------|-----|------|----|-----|
| Q8BTM8 | Filamin-A (Alpha-filamin) (Filamin-1) (Endothelial actin-binding protein) (Actin-binding protein 280) (ABP-280) (Non-muscle filamin)                                                                  | Flna (Fln) (Fln1)     | 254 | 1031 | 46 | 86  |
| P06745 | Glucose-6-phosphate isomerase (GPI) (EC 5.3.1.9) (Phosphoglucose isomerase) (PGI) (Phosphohexose isomerase) (PHI) (Neuroleukin) (NLK)                                                                 | Gpi (Gpi1)            | 39  | 107  | 12 | 22  |
| Q7TSG3 | F-box only protein 5 (Early mitotic inhibitor 1)                                                                                                                                                      | Fbxo5 (Emi1)          | 15  | 27   | 5  | 9   |
| Q62159 | Rho-related GTP-binding protein RhoC (Silica-induced gene 61 protein) (SIG-61)                                                                                                                        | Rhoc (Arhc)           | 33  | 173  | 5  | 9   |
| Q99N50 | Synaptotagmin-like protein 2 (Exophilin-4)                                                                                                                                                            | Syt12 (Slp2)          | 26  | 77   | 10 | 18  |
| Q61414 | Keratin, type I cytoskeletal 15 (Cytokeratin-15) (CK-15) (Keratin-15) (K15)                                                                                                                           | Krt15 (Krt1-15)       | 37  | 46   | 4  | 7   |
| P62962 | Profilin-1 (Profilin I)                                                                                                                                                                               | Pfn1                  | 30  | 93   | 4  | 7   |
| O35381 | Acidic leucine-rich nuclear phosphoprotein 32 family member A (Potent heat-stable protein phosphatase 2A inhibitor I1PP2A) (Acidic nuclear phosphoprotein pp32) (Leucine-rich acidic nuclear protein) | Anp32a (Anp32) (Lanp) | 36  | 112  | 8  | 14  |
| P56198 | Cell death activator CIDE-3 (Cell death-inducing DFFA-like effector protein C) (Fat-specific protein FSP27)                                                                                           | Cidec (Fsp27)         | 51  | 39   | 8  | 14  |
| P18760 | Cofilin-1 (Cofilin, non-muscle isoform)                                                                                                                                                               | Cfl1                  | 959 | 2552 | 70 | 122 |
| P17742 | Peptidyl-prolyl cis-trans isomerase A (PPIase A) (Rotamase A) (EC 5.2.1.8) (Cyclophilin A) (Cyclosporin A-binding protein) (SP18)                                                                     | Ppia                  | 855 | 1549 | 38 | 66  |
| Q9Z1R2 | Large proline-rich protein BAT3 (HLA-B-associated transcript 3)                                                                                                                                       | Bat3                  | 80  | 49   | 15 | 26  |
| Q9D009 | Putative octanoyltransferase, mitochondrial (EC 2.3.1.181) (Octanoyl-[acyl-carrier-protein]-protein N-octanoyltransferase) (Lipoyl/octanoyl transferase) (Lipoate-protein ligase B)                   |                       | 38  | 42   | 11 | 19  |

|        |                                                                                                                                                                                                                                                         |                                         |     |     |    |    |
|--------|---------------------------------------------------------------------------------------------------------------------------------------------------------------------------------------------------------------------------------------------------------|-----------------------------------------|-----|-----|----|----|
| Q8BFQ9 | Kelch domain-containing protein 5                                                                                                                                                                                                                       | Klhdc5<br>(Kiaa1340)                    | 30  | 22  | 10 | 17 |
| Q9Z129 | ATP-dependent DNA helicase Q1 (EC 3.6.1.-)<br>(DNA-dependent ATPase Q1)                                                                                                                                                                                 | Recql (Recql1)                          | 17  | 27  | 13 | 22 |
| Q9ERK4 | Exportin-2 (Exp2) (Importin-alpha re-exporter)<br>(Chromosome segregation 1-like protein)                                                                                                                                                               | Cse1l (Xpo2)                            | 42  | 153 | 26 | 44 |
| P62960 | Nuclease-sensitive element-binding protein 1<br>(Y-box-binding protein 1) (Y-box transcription<br>factor) (YB-1) (CCAAT-binding transcription<br>factor I subunit A) (CBF-A) (Enhancer factor I<br>subunit A) (EFI-A) (DNA-binding protein B)<br>(DBPB) | Ybx1 (Msy-1)<br>(Msy1)<br>(Nsep1) (Yb1) | 56  | 126 | 6  | 10 |
| Q922U2 | Keratin, type II cytoskeletal 5 (Cytokeratin-5)<br>(CK-5) (Keratin-5) (K5)                                                                                                                                                                              | Krt5 (Krt2-5)                           | 396 | 550 | 23 | 38 |
| Q8BHG1 | Nardilysin (EC 3.4.24.61) (N-arginine dibasic<br>convertase) (NRD convertase) (NRD-C)                                                                                                                                                                   | Nrd1                                    | 53  | 54  | 13 | 21 |
| Q6ZWX6 | Eukaryotic translation initiation factor 2 subunit<br>1 (Eukaryotic translation initiation factor 2<br>subunit alpha) (eIF-2-alpha) (EIF-2alpha) (EIF-<br>2A)                                                                                           | Eif2s1 (Eif2a)                          | 27  | 177 | 7  | 11 |
| Q80Y17 | Lethal(2) giant larvae protein homolog 1<br>(LLGL) (Mlgl) (Mgl-1)                                                                                                                                                                                       | Llgl1 (Llglh)                           | 30  | 29  | 7  | 11 |
| Q61990 | Poly(rC)-binding protein 2 (Alpha-CP2)<br>(Putative heterogeneous nuclear<br>ribonucleoprotein X) (hnRNP X) (CTBP) (CBP)                                                                                                                                | Pcbp2 (Cbp)<br>(HnrnpX)<br>(Hnrpx)      | 29  | 194 | 7  | 11 |
| P63001 | Ras-related C3 botulinum toxin substrate 1<br>(p21-Rac1)                                                                                                                                                                                                | Rac1                                    | 31  | 99  | 7  | 11 |
| P62082 | 40S ribosomal protein S7                                                                                                                                                                                                                                | Rps7                                    | 104 | 126 | 9  | 14 |
| P63158 | High mobility group protein B1 (High mobility<br>group protein 1) (HMG-1)                                                                                                                                                                               | Hmgb1 (Hmg-<br>1) (Hmg1)                | 153 | 405 | 25 | 38 |
| Q8K386 | Ras-related protein Rab-15                                                                                                                                                                                                                              | Rab15                                   | 44  | 74  | 4  | 6  |

|        |                                                                                                                                                      |                                   |     |     |    |    |
|--------|------------------------------------------------------------------------------------------------------------------------------------------------------|-----------------------------------|-----|-----|----|----|
| Q7TN83 | Synaptotagmin-16 (Synaptotagmin XIV-related protein) (Synaptotagmin 14-like protein)                                                                 | Syt16 (Strep14) (Syt14l) (Syt14r) | 20  | 38  | 6  | 9  |
| P50247 | Adenosylhomocysteinase (AdoHcyase) (EC 3.3.1.1) (S-adenosyl-L-homocysteine hydrolase) (Liver copper-binding protein) (CUBP)                          | Ahcy                              | 90  | 106 | 10 | 15 |
| P83741 | Serine/threonine-protein kinase WNK1 (EC 2.7.11.1) (Protein kinase with no lysine 1) (Protein kinase, lysine-deficient 1)                            | Wnk1 (Prkwk1)                     | 56  | 36  | 18 | 27 |
| P61982 | 14-3-3 protein gamma                                                                                                                                 | Ywhag                             | 653 | 841 | 53 | 79 |
| P97868 | Retinoblastoma-binding protein 6 (p53-associated cellular protein of testis) (Proliferation potential-related protein) (Protein P2P-R)               | Rbbp6 (P2pr) (Pact)               | 21  | 29  | 24 | 35 |
| P60335 | Poly(rC)-binding protein 1 (Alpha-CP1) (hnRNP-E1)                                                                                                    | Pcbp1                             | 56  | 350 | 9  | 13 |
| Q00342 | FL cytokine receptor (EC 2.7.10.1) (Tyrosine-protein kinase receptor flk-2) (Fetal liver kinase 2) (Tyrosine-protein kinase FLT3) (CD antigen CD135) | Flt3 (Flk-2) (Flt3)               | 17  | 34  | 7  | 10 |
| P12813 | Nuclear receptor subfamily 4 group A member 1 (Orphan nuclear receptor HMR) (Nuclear hormone receptor NUR/77) (N10 nuclear protein)                  | Nr4a1 (Gfrp) (Hmr) (N10) (Nur77)  | 61  | 31  | 7  | 10 |
| P07744 | Keratin, type II cytoskeletal 4 (Cytokeratin-4) (CK-4) (Keratin-4) (K4) (Cytoskeletal 57 kDa keratin)                                                | Krt4 (Krt2-4)                     | 36  | 74  | 19 | 27 |
| Q9Z1F9 | SUMO-activating enzyme subunit 2 (EC 6.3.2.-) (Ubiquitin-like 1-activating enzyme E1B) (Anthracycline-associated resistance ARX)                     | Uba2 (Sae2) (Uble1b)              | 62  | 77  | 10 | 14 |
| Q8VHX6 | Filamin-C (Gamma-filamin) (Filamin-2) (FLN-C) (Actin-binding-like protein) (ABP-L) (ABP-280-like protein)                                            | FlnC (Abpl) (Fln2)                | 33  | 115 | 18 | 25 |

|        |                                                                                                                                                                                                                                                                                        |                |     |     |    |    |
|--------|----------------------------------------------------------------------------------------------------------------------------------------------------------------------------------------------------------------------------------------------------------------------------------------|----------------|-----|-----|----|----|
| P68510 | 14-3-3 protein eta                                                                                                                                                                                                                                                                     | Ywhah          | 707 | 962 | 58 | 80 |
| P27641 | ATP-dependent DNA helicase 2 subunit 2 (EC 3.6.1.-) (ATP-dependent DNA helicase II 80 kDa subunit) (Ku autoantigen protein p86 homolog) (Ku80) (CTC box-binding factor 85 kDa subunit) (CTCBF) (CTC85) (Nuclear factor IV) (DNA repair protein XRCC5)                                  | Xrcc5 (G22p2)  | 22  | 29  | 16 | 22 |
| Q61937 | Nucleophosmin (NPM) (Nucleolar phosphoprotein B23) (Numatrin) (Nucleolar protein NO38)                                                                                                                                                                                                 | Npm1           | 92  | 66  | 11 | 15 |
| Q8K298 | Actin-binding protein anillin                                                                                                                                                                                                                                                          | Anln           | 16  | 28  | 17 | 23 |
| Q61789 | Laminin subunit alpha-3 (Nicein subunit alpha)                                                                                                                                                                                                                                         | Lama3          | 26  | 26  | 37 | 50 |
| Q9EPL8 | Importin-7 (Imp7) (Ran-binding protein 7) (RanBP7)                                                                                                                                                                                                                                     | Ipo7 (Ranbp7)  | 25  | 121 | 9  | 12 |
| Q9WTX2 | Interferon-inducible double stranded RNA-dependent protein kinase activator A (Protein kinase, interferon-inducible double stranded RNA-dependent activator) (Protein activator of the interferon-induced protein kinase) (PKR-associated protein X) (PKR-associating protein X) (RAX) | Prkra (Rax)    | 28  | 39  | 9  | 12 |
| Q640P2 | Angiopoietin-related protein 1 (Angiopoietin-like 1)                                                                                                                                                                                                                                   | Angptl1        | 55  | 41  | 21 | 28 |
| Q9ERU9 | E3 SUMO-protein ligase RanBP2 (Ran-binding protein 2)                                                                                                                                                                                                                                  | Ranbp2         | 56  | 49  | 40 | 53 |
| P70168 | Importin subunit beta-1 (Karyopherin subunit beta-1) (Nuclear factor P97) (Pore targeting complex 97 kDa subunit) (PTAC97) (SCG)                                                                                                                                                       | Kpnb1 (Impnb)  | 48  | 17  | 13 | 17 |
| Q9Z277 | Bromodomain adjacent to zinc finger domain protein 1B (Williams-Beuren syndrome chromosomal region 9 protein homolog) (WBRS9)                                                                                                                                                          | Baz1b (Wbscr9) | 43  | 17  | 26 | 34 |

|        |                                                                                                                                                                         |                                  |      |      |     |     |
|--------|-------------------------------------------------------------------------------------------------------------------------------------------------------------------------|----------------------------------|------|------|-----|-----|
| Q921C5 | Protein bicaudal D homolog 2 (Bic-D 2)                                                                                                                                  | Bicd2 (Kiaa0699)                 | 31   | 23   | 26  | 34  |
| Q61595 | Kinectin                                                                                                                                                                | Ktn1                             | 15   | 50   | 43  | 56  |
| P63321 | Ras-related protein Ral-A                                                                                                                                               | Rala (Ral) (Rala)                | 25   | 22   | 30  | 39  |
| Q8CIM1 | Leucine-rich repeat-containing protein 45                                                                                                                               | Lrrc45                           | 33   | 71   | 27  | 35  |
| P47753 | F-actin-capping protein subunit alpha-1 (CapZ alpha-1)                                                                                                                  | Capza1 (Cappa1)                  | 60   | 33   | 7   | 9   |
| Q80X90 | Filamin-B (FLN-B) (Beta-filamin) (Actin-binding like protein) (ABP-280-like protein)                                                                                    | Flnb                             | 63   | 279  | 32  | 41  |
| Q91YK0 | Leucine-rich repeat-containing protein 49 (Tubulin polyglutamylase complex subunit 4) (PGs4) (p79)                                                                      | Lrrc49                           | 27   | 27   | 18  | 23  |
| Q61496 | Probable ATP-dependent RNA helicase DDX4 (EC 3.6.1.-) (DEAD box protein 4) (Vasa homolog) (Mvh)                                                                         | Ddx4 (Vasa)                      | 17   | 25   | 44  | 56  |
| O70456 | 14-3-3 protein sigma (Stratifin)                                                                                                                                        | Sfn (Mkrn3)                      | 573  | 666  | 56  | 71  |
| P27661 | Histone H2A.x (H2a/x)                                                                                                                                                   | H2afx (H2a.x) (H2ax) (Hist5-2ax) | 301  | 426  | 15  | 19  |
| Q62093 | Splicing factor, arginine/serine-rich 2 (Splicing factor SC35) (SC-35) (Splicing component, 35 kDa) (Protein PR264) (Putative myelin regulatory factor 1) (MRF-1)       | Sfrs2 (Pr264) (Sfrs10)           | 184  | 117  | 15  | 19  |
| P20152 | Vimentin                                                                                                                                                                | Vim                              | 1749 | 2397 | 125 | 157 |
| P61028 | Ras-related protein Rab-8B                                                                                                                                              | Rab8b                            | 17   | 59   | 4   | 5   |
| Q60716 | Prolyl 4-hydroxylase subunit alpha-2 (EC 1.14.11.2) (4-PH alpha-2) (Procollagen-proline,2-oxoglutarate-4-dioxygenase subunit alpha-2)                                   | P4ha2                            | 22   | 27   | 8   | 10  |
| Q63ZW7 | InaD-like protein (Inadl protein) (Pals1-associated tight junction protein) (Protein associated to tight junctions) (Channel-interacting PDZ domain-containing protein) | Inadl (Cipp) (Patj)              | 18   | 30   | 12  | 15  |
| Q3UKC1 | Tax1-binding protein 1 homolog                                                                                                                                          | Tax1bp1                          | 22   | 27   | 24  | 30  |

|        |                                                                                                                                                                                         |                             |      |      |     |     |
|--------|-----------------------------------------------------------------------------------------------------------------------------------------------------------------------------------------|-----------------------------|------|------|-----|-----|
| P63101 | 14-3-3 protein zeta/delta (Protein kinase C inhibitor protein 1) (KCIP-1) (SEZ-2)                                                                                                       | Ywhaz                       | 1383 | 1947 | 96  | 120 |
| P31001 | Desmin                                                                                                                                                                                  | Des                         | 169  | 224  | 25  | 31  |
| Q80Z38 | SH3 and multiple ankyrin repeat domains protein 2 (Shank2) (Cortactin-binding protein 1) (CortBP1)                                                                                      | Shank2 (Cortbp1) (Kiaa1022) | 41   | 57   | 21  | 26  |
| Q8R2X8 | Golgin-45 (Basic leucine zipper nuclear factor 1)                                                                                                                                       | Blzf1                       | 28   | 22   | 13  | 16  |
| Q8VII8 | Mineralocorticoid receptor (MR) (Nuclear receptor subfamily 3 group C member 2)                                                                                                         | Nr3c2 (Mlr)                 | 28   | 22   | 18  | 22  |
| Q9CZY3 | Ubiquitin-conjugating enzyme E2 variant 1 (UEV-1) (CROC-1)                                                                                                                              | Ube2v1 (Croc1)              | 83   | 163  | 166 | 201 |
| P49025 | Citron Rho-interacting kinase (CRIK) (EC 2.7.11.1) (Rho-interacting, serine/threonine-protein kinase 21)                                                                                | Cit                         | 49   | 67   | 67  | 81  |
| P47754 | F-actin-capping protein subunit alpha-2 (CapZ alpha-2)                                                                                                                                  | Capza2 (Cappa2)             | 60   | 33   | 5   | 6   |
| O35618 | Protein Mdm4 (p53-binding protein Mdm4) (Mdm2-like p53-binding protein) (Protein Mdmx) (Double minute 4 protein)                                                                        | Mdm4 (Mdmx)                 | 17   | 29   | 5   | 6   |
| P05784 | Keratin, type I cytoskeletal 18 (Cytokeratin-18) (CK-18) (Keratin-18) (K18) (Cytokeratin endo B) (Keratin D)                                                                            | Krt18 (Kerd) (Krt1-18)      | 37   | 46   | 10  | 12  |
| P54227 | Stathmin (Phosphoprotein p19) (pp19) (Leukemia-associated phosphoprotein p18) (Oncoprotein 18) (Op18) (pp17) (Prosolin) (Metablastin) (Protein Pr22) (Leukemia-associated gene protein) | Stmn1 (Lag) (Lap18) (Pr22)  | 121  | 120  | 10  | 12  |
| Q8BFY9 | Transportin-1 (Importin beta-2) (Karyopherin beta-2)                                                                                                                                    | Tnpo1 (Kpnb2)               | 54   | 43   | 10  | 12  |
| P80315 | T-complex protein 1 subunit delta (TCP-1-delta) (CCT-delta) (A45)                                                                                                                       | Cct4 (Cctd)                 | 61   | 59   | 15  | 18  |
| O08908 | Phosphatidylinositol 3-kinase regulatory subunit beta (PI3-kinase p85 subunit beta) (PtdIns-3-kinase p85-beta)                                                                          | Pik3r2                      | 19   | 25   | 20  | 24  |
| Q60575 | Kinesin-like protein KIF1B                                                                                                                                                              | Kif1b                       | 45   | 95   | 30  | 36  |



|        |                                                                                                                                                                       |                                |    |    |    |    |
|--------|-----------------------------------------------------------------------------------------------------------------------------------------------------------------------|--------------------------------|----|----|----|----|
| Q9JKF1 | Ras GTPase-activating-like protein IQGAP1                                                                                                                             | Iqgap1                         | 19 | 81 | 21 | 25 |
| O08810 | 116 kDa U5 small nuclear ribonucleoprotein component (U5 snRNP-specific protein, 116 kDa) (U5-116 kDa) (Elongation factor Tu GTP-binding domain-containing protein 2) | Eftud2 (Snrp116)               | 80 | 68 | 21 | 25 |
| Q61771 | Kinesin-like protein KIF3B (Microtubule plus end-directed kinesin motor 3B)                                                                                           | Kif3b                          | 30 | 51 | 16 | 19 |
| Q9R0K7 | Plasma membrane calcium-transporting ATPase 2 (PMCA2) (EC 3.6.3.8) (Plasma membrane calcium ATPase isoform 2) (Plasma membrane calcium pump isoform 2)                | Atp2b2 (Pmca2)                 | 32 | 27 | 70 | 83 |
| P54103 | DnaJ homolog subfamily C member 2 (Zuotin-related factor 1) (Mouse Id associate 1) (MIDA1)                                                                            | Dnajc2 (Mida1) (Zrf1)          | 23 | 27 | 11 | 13 |
| P80313 | T-complex protein 1 subunit eta (TCP-1-eta) (CCT-eta)                                                                                                                 | Cct7 (Ccth)                    | 49 | 50 | 11 | 13 |
| Q80XA6 | RalBP1-associated Eps domain-containing protein 2 (RalBP1-interacting protein 2) (Partner of RalBP1)                                                                  | Reps2 (Pob1)                   | 33 | 31 | 6  | 7  |
| P55821 | Stathmin-2 (Superior cervical ganglion-10 protein) (Protein SCG10)                                                                                                    | Stmn2 (Scg10) (Scgn10) (Stmb2) | 74 | 73 | 6  | 7  |
| Q9WUM4 | Coronin-1C (Coronin-3)                                                                                                                                                | Coro1c                         | 42 | 28 | 18 | 21 |
| P49718 | DNA replication licensing factor MCM5 (CDC46 homolog) (P1-CDC46)                                                                                                      | Mcm5 (Cdc46) (Mcmd5)           | 40 | 20 | 18 | 21 |
| Q5SPW0 | Vacuolar protein sorting-associated protein 54 (Tumor antigen SLP-8p homolog)                                                                                         | Vps54                          | 36 | 28 | 13 | 15 |
| P48754 | Breast cancer type 1 susceptibility protein homolog                                                                                                                   | Brca1                          | 28 | 25 | 26 | 30 |
| Q62418 | Drebrin-like protein (SH3 domain-containing protein 7) (Actin-binding protein 1)                                                                                      | Dbnl (Abp1) (Sh3p7)            | 24 | 39 | 7  | 8  |

|        |                                                                                                                                                                                                                                                                                                                    |                                   |     |     |     |     |
|--------|--------------------------------------------------------------------------------------------------------------------------------------------------------------------------------------------------------------------------------------------------------------------------------------------------------------------|-----------------------------------|-----|-----|-----|-----|
| Q9Z2K1 | Keratin, type I cytoskeletal 16 (Cytokeratin-16) (CK-16) (Keratin-16) (K16)                                                                                                                                                                                                                                        | Krt16 (Krt1-16)                   | 37  | 37  | 7   | 8   |
| Q9QWY8 | 130 kDa phosphatidylinositol 4,5-biphosphate-dependent ARF1 GTPase-activating protein (PIP2-dependent ARF1 GAP) (ADP-ribosylation factor-directed GTPase-activating protein 1) (ARF GTPase-activating protein 1) (Development and differentiation-enhancing factor 1) (Differentiation-enhancing factor 1) (DEF-1) | Ddef1 (Asap1) (Kiaa1249) (Shag1)  | 26  | 23  | 14  | 16  |
| P58660 | Caspase recruitment domain-containing protein 10 (Bcl10-interacting MAGUK protein 1) (Bimp1)                                                                                                                                                                                                                       | Card10 (Bimp1)                    | 33  | 23  | 15  | 17  |
| P55200 | Histone-lysine N-methyltransferase HRX (EC 2.1.1.43) (Zinc finger protein HRX) (ALL-1)                                                                                                                                                                                                                             | Mll (All1) (Hrx) (Mll1)           | 67  | 26  | 39  | 44  |
| Q9CQV8 | 14-3-3 protein beta/alpha (Protein kinase C inhibitor protein 1) (KCIP-1)                                                                                                                                                                                                                                          | Ywhab                             | 983 | 971 | 71  | 80  |
| P40124 | Adenylyl cyclase-associated protein 1 (CAP 1)                                                                                                                                                                                                                                                                      | Cap1 (Cap)                        | 22  | 43  | 8   | 9   |
| Q91X97 | Neurocalcin-delta                                                                                                                                                                                                                                                                                                  | Ncald (D15Ert412e)                | 85  | 82  | 8   | 9   |
| Q9WUF3 | CASP8-associated protein 2 (FLICE-associated huge protein)                                                                                                                                                                                                                                                         | Casp8ap2 (Flash)                  | 28  | 16  | 26  | 29  |
| P41230 | Histone demethylase JARID1C (EC 1.14.11.-) (Jumonji/ARID domain-containing protein 1C) (Protein SmcX) (Protein Xe169)                                                                                                                                                                                              | Jarid1c (Kiaa0234) (Smcx) (Xe169) | 34  | 32  | 26  | 29  |
| P26618 | Alpha-type platelet-derived growth factor receptor (EC 2.7.10.1) (PDGF-R-alpha) (CD140 antigen-like family member A) (CD antigen CD140a)                                                                                                                                                                           | Pdgfra                            | 37  | 73  | 160 | 178 |
| Q61599 | Rho GDP-dissociation inhibitor 2 (Rho GDI 2) (Rho-GDI beta) (D4)                                                                                                                                                                                                                                                   | Arhgdib (Gdid4)                   | 18  | 25  | 9   | 10  |

|        |                                                                                                                                                                                                    |                                    |      |      |     |     |
|--------|----------------------------------------------------------------------------------------------------------------------------------------------------------------------------------------------------|------------------------------------|------|------|-----|-----|
| Q91ZT5 | FYVE, RhoGEF and PH domain-containing protein 4 (Actin filament-binding protein frabin) (FGD1-related F-actin-binding protein)                                                                     | Fgd4                               | 29   | 19   | 10  | 11  |
| O55234 | Proteasome subunit beta type-5 (EC 3.4.25.1) (Proteasome epsilon chain) (Macropain epsilon chain) (Multicatalytic endopeptidase complex epsilon chain) (Proteasome subunit X) (Proteasome chain 6) | Psmb5                              | 168  | 227  | 10  | 11  |
| Q93092 | Transaldolase (EC 2.2.1.2)                                                                                                                                                                         | Taldo1 (Tal) (Taldo)               | 20   | 93   | 10  | 11  |
| Q9R0Q7 | Prostaglandin E synthase 3 (EC 5.3.99.3) (Cytosolic prostaglandin E2 synthase) (cPGES) (Telomerase-binding protein p23) (Hsp90 co-chaperone) (Progesterone receptor complex p23) (Sid 3177)        | Ptges3 (Sid3177) (Tebp)            | 124  | 239  | 10  | 11  |
| P19001 | Keratin, type I cytoskeletal 19 (Cytokeratin-19) (CK-19) (Keratin-19) (K19)                                                                                                                        | Krt19 (Krt1-19)                    | 37   | 46   | 11  | 12  |
| P49717 | DNA replication licensing factor MCM4 (CDC21 homolog) (P1-CDC21)                                                                                                                                   | Mcm4 (Cdc21) (Mcmd4)               | 29   | 18   | 11  | 12  |
| Q3THS6 | S-adenosylmethionine synthetase isoform type 2 (AdoMet synthetase 2) (EC 2.5.1.6) (Methionine adenosyltransferase 2)                                                                               | Mat2a                              | 26   | 42   | 11  | 12  |
| Q9QUI0 | Transforming protein RhoA                                                                                                                                                                          | Rhoa (Arha) (Arha2)                | 117  | 231  | 11  | 12  |
| P27546 | Microtubule-associated protein 4 (MAP-4)                                                                                                                                                           | Map4 (Mtap4)                       | 94   | 41   | 33  | 36  |
| P07901 | Heat shock protein HSP 90-alpha (HSP 86) (Tumor-specific transplantation 86 kDa antigen) (TSTA)                                                                                                    | Hsp90aa1 (Hsp86) (Hsp86-1) (Hspca) | 1529 | 2324 | 134 | 146 |

|        |                                                                                                                                                                                                                                       |                                    |     |     |    |    |
|--------|---------------------------------------------------------------------------------------------------------------------------------------------------------------------------------------------------------------------------------------|------------------------------------|-----|-----|----|----|
| Q6P9Z1 | SWI/SNF-related matrix-associated actin-dependent regulator of chromatin subfamily D member 3 (60 kDa BRG-1/Brm-associated factor subunit C) (BRG1-associated factor 60C) (mBAF60c)                                                   | Smarcd3 (Baf60c)                   | 29  | 19  | 46 | 50 |
| P38647 | Stress-70 protein, mitochondrial (75 kDa glucose-regulated protein) (GRP 75) (Heat shock 70 kDa protein 9) (Peptide-binding protein 74) (PBP74) (P66 MOT) (Mortalin)                                                                  | Hspa9 (Grp75) (Hsp74) (Hspa9a)     | 33  | 33  | 12 | 13 |
| Q8BKC5 | Importin-5 (Imp5) (Importin subunit beta-3) (Karyopherin beta-3) (Ran-binding protein 5) (RanBP5)                                                                                                                                     | Ipo5 (Kpnb3) (Ranbp5)              | 185 | 91  | 12 | 13 |
| P08113 | Endoplasmic (Heat shock protein 90 kDa beta member 1) (94 kDa glucose-regulated protein) (GRP94) (ERP99) (Polymorphic tumor rejection antigen 1) (Tumor rejection antigen gp96)                                                       | Hsp90b1 (Tra-1) (Tra1)             | 221 | 298 | 25 | 27 |
| Q9Z104 | SWI/SNF-related matrix-associated actin-dependent regulator of chromatin subfamily E member 1-related (SMARCE1-related protein) (HMG box-containing protein 20B) (Structural DNA-binding protein BRAF35) (BRCA2-associated factor 35) | Hmg20b (Braf35) (Hmgx2) (Smarce1r) | 30  | 20  | 14 | 15 |
| P11984 | T-complex protein 1 subunit alpha A (TCP-1-alpha) (CCT-alpha) (Tailless complex polypeptide 1A) (TCP-1-A)                                                                                                                             | Cct1 (Ccta) (Tcp1)                 | 29  | 66  | 14 | 15 |
| Q8BKX6 | Serine/threonine-protein kinase SMG1 (SMG-1) (EC 2.7.11.1)                                                                                                                                                                            | Smg1 (Kiaa0421)                    | 33  | 27  | 30 | 32 |
| Q76MZ3 | Serine/threonine-protein phosphatase 2A 65 kDa regulatory subunit A alpha isoform (PP2A, subunit A, PR65-alpha isoform) (PP2A, subunit A, R1-alpha isoform)                                                                           | Ppp2r1a                            | 142 | 242 | 22 | 23 |
| P16546 | Spectrin alpha chain, brain (Spectrin, non-erythroid alpha chain) (Alpha-II spectrin) (Fodrin alpha chain)                                                                                                                            | Sptan1 (Spna2) (Spta2)             | 68  | 86  | 66 | 69 |

|        |                                                                                                                                                                                                        |                                       |     |     |     |     |
|--------|--------------------------------------------------------------------------------------------------------------------------------------------------------------------------------------------------------|---------------------------------------|-----|-----|-----|-----|
| Q61820 | GTP-binding nuclear protein Ran, testis-specific isoform                                                                                                                                               | Rasl2-9                               | 564 | 570 | 23  | 24  |
| Q920R0 | Alsin (Amyotrophic lateral sclerosis protein 2 homolog)                                                                                                                                                | Als2                                  | 74  | 88  | 72  | 75  |
| Q62504 | Msx2-interacting protein (SPEN homolog) (SMART/HDAC1-associated repressor protein)                                                                                                                     | Spn (Kiaa0929) (Mint) (Sharp)         | 27  | 18  | 72  | 75  |
| O35973 | Period circadian protein homolog 1 (Circadian clock protein PERIOD 1) (Circadian pacemaker protein Rigi) (mPER1)                                                                                       | Per1 (Per) (Rigi)                     | 29  | 21  | 27  | 28  |
| P26039 | Talin-1                                                                                                                                                                                                | Tln1 (Tln)                            | 123 | 161 | 41  | 42  |
| Q9JM05 | E3 SUMO-protein ligase PIAS4 (Protein inhibitor of activated STAT protein 4) (Protein inhibitor of activated STAT protein gamma) (PIAS-gamma) (PIASy)                                                  | Pias4 (Piasg)                         | 26  | 29  | 162 | 165 |
| P09586 | Prolactin-3B1 (Chorionic somatomammotropin hormone 2) (Placental lactogen II) (PL-II)                                                                                                                  | Pr13b1 (Csh2) (PI-2) (PI2)            | 29  | 21  | 2   | 2   |
| P62141 | Serine/threonine-protein phosphatase PP1-beta catalytic subunit (PP-1B) (EC 3.1.3.16)                                                                                                                  | Ppp1cb                                | 177 | 57  | 4   | 4   |
| P12367 | cAMP-dependent protein kinase type II-alpha regulatory subunit                                                                                                                                         | Prkar2a                               | 33  | 23  | 5   | 5   |
| P30416 | FK506-binding protein 4 (EC 5.2.1.8) (Peptidyl-prolyl cis-trans isomerase) (PPIase) (Rotamase) (HSP-binding immunophilin) (HBI) (FKBP52 protein) (52 kDa FK506-binding protein) (FKBP59) (p59 protein) | Fkbp4                                 | 40  | 62  | 8   | 8   |
| Q9R190 | Metastasis-associated protein MTA2 (Metastasis-associated 1-like 1)                                                                                                                                    | Mta2 (Mta11)                          | 27  | 26  | 9   | 9   |
| Q9DAI4 | Zinc finger and BTB domain-containing protein 43 (Zinc finger protein 297B)                                                                                                                            | Zbtb43 (Kiaa0414) (Zfp297b) (Znf297b) | 23  | 51  | 9   | 9   |

|        |                                                                                                                                                      |                                       |     |     |     |     |
|--------|------------------------------------------------------------------------------------------------------------------------------------------------------|---------------------------------------|-----|-----|-----|-----|
| Q61781 | Keratin, type I cytoskeletal 14 (Cytokeratin-14) (CK-14) (Keratin-14) (K14)                                                                          | Krt14 (Krt1-14)                       | 38  | 37  | 10  | 10  |
| Q9WV80 | Sorting nexin-1                                                                                                                                      | Snx1                                  | 23  | 49  | 11  | 11  |
| Q61092 | Laminin subunit gamma-2 (Laminin 5 gamma 2 subunit) (Kalinin/nicein/epiligrin 100 kDa subunit) (Laminin B2t chain)                                   | Lamc2                                 | 33  | 29  | 13  | 13  |
| Q9DB77 | Cytochrome b-c1 complex subunit 2, mitochondrial (Ubiquinol-cytochrome-c reductase complex core protein 2) (Core protein II) (Complex III subunit 2) | Uqcrc2                                | 29  | 20  | 13  | 13  |
| Q9JIF7 | Coatomer subunit beta (Beta-coat protein) (Beta-COP)                                                                                                 | Copb1 (Copb)                          | 37  | 22  | 15  | 15  |
| P25206 | DNA replication licensing factor MCM3 (DNA polymerase alpha holoenzyme-associated protein P1) (P1-MCM3)                                              | Mcm3 (Mcnd) (Mcmd3)                   | 74  | 185 | 15  | 15  |
| Q01098 | Glutamate [NMDA] receptor subunit epsilon-3 (N-methyl D-aspartate receptor subtype 2C) (NMDAR2C) (NR2C)                                              | Grin2c                                | 18  | 33  | 15  | 15  |
| O08788 | Dynactin subunit 1 (150 kDa dynein-associated polypeptide) (DAP-150) (DP-150) (p150-glued)                                                           | Dctn1                                 | 64  | 70  | 19  | 19  |
| Q8R4K2 | Interleukin-1 receptor-associated kinase 4 (IRAK-4) (EC 2.7.11.1)                                                                                    | Irak4                                 | 32  | 47  | 22  | 22  |
| Q8BSS9 | Liprin-alpha-2 (Protein tyrosine phosphatase receptor type f polypeptide-interacting protein alpha-2) (PTPRF-interacting protein alpha-2)            | Ppfia2                                | 36  | 21  | 22  | 22  |
| Q80UK8 | Integrator complex subunit 2 (Int2)                                                                                                                  | Ints2 (Kiaa1287)                      | 16  | 27  | 24  | 24  |
| Q62261 | Spectrin beta chain, brain 1 (Spectrin, non-erythroid beta chain 1) (Beta-II spectrin) (Fodrin beta chain) (Embryonic liver fodrin)                  | Sptbn1 (Elf) (Spnb-2) (Spnb2) (Sptb2) | 56  | 54  | 48  | 48  |
| Q9QYX7 | Protein piccolo (Aczonin) (Multidomain presynaptic cytomatrix protein) (Brain-derived HLMN protein)                                                  | Pclo (Acz)                            | 101 | 117 | 114 | 114 |

|        |                                                                                                                                                                                                              |                                        |      |      |     |     |
|--------|--------------------------------------------------------------------------------------------------------------------------------------------------------------------------------------------------------------|----------------------------------------|------|------|-----|-----|
| P68254 | 14-3-3 protein theta (14-3-3 protein tau)                                                                                                                                                                    | Ywhaq                                  | 1104 | 994  | 92  | 91  |
| P11499 | Heat shock protein HSP 90-beta (HSP 84) (Tumor-specific transplantation 84 kDa antigen) (TSTA)                                                                                                               | Hsp90ab1 (Hsp84) (Hsp84-1) (Hspcb)     | 2943 | 3523 | 208 | 205 |
| Q91YE5 | Bromodomain adjacent to zinc finger domain protein 2A (Transcription termination factor I-interacting protein 5) (TTF-I-interacting protein 5) (Tip5)                                                        | Baz2a (Tip5)                           | 36   | 15   | 56  | 55  |
| P45591 | Cofilin-2 (Cofilin, muscle isoform)                                                                                                                                                                          | Cfl2                                   | 528  | 431  | 39  | 38  |
| O08638 | Myosin-11 (Myosin heavy chain 11) (Myosin heavy chain, smooth muscle isoform) (SMMHC)                                                                                                                        | Myh11                                  | 211  | 221  | 79  | 76  |
| Q8R4B8 | NACHT, LRR and PYD domains-containing protein 3 (Cold autoinflammatory syndrome 1 protein homolog) (Cryopyrin) (PYRIN-containing APAF1-like protein 1) (Mast cell maturation-associated-inducible protein 1) | Nlrp3 (Cias1) (Mmig1) (Nalp3) (Pypaf1) | 30   | 20   | 24  | 23  |
| Q91V92 | ATP-citrate synthase (EC 2.3.3.8) (ATP-citrate (pro-S)-lyase) (Citrate cleavage enzyme)                                                                                                                      | Acly                                   | 349  | 488  | 45  | 43  |
| P07724 | Serum albumin                                                                                                                                                                                                | Alb (Alb-1) (Alb1)                     | 550  | 572  | 22  | 21  |
| Q61768 | Kinesin-1 heavy chain (Ubiquitous kinesin heavy chain) (UKHC) (Conventional kinesin heavy chain)                                                                                                             | Kif5b (Khcs) (Kns1)                    | 102  | 303  | 43  | 41  |
| Q6ZPK0 | PHD finger protein 21A (BRAF35-HDAC complex protein BHC80) (mBHC80) (BHC80a)                                                                                                                                 | Phf21a (Bhc80) (Kiaa1696) (Pff1)       | 28   | 37   | 20  | 19  |
| P62827 | GTP-binding nuclear protein Ran (GTPase Ran) (Ras-related nuclear protein) (Ras-like protein TC4)                                                                                                            | Ran (Rasl2-8)                          | 756  | 656  | 38  | 36  |
| P03966 | N-myc proto-oncogene protein                                                                                                                                                                                 | Mycn (Nmyc) (Nmyc1)                    | 65   | 46   | 18  | 17  |
| Q99PF4 | Cadherin-23 (Otocadherin)                                                                                                                                                                                    | Cdh23                                  | 29   | 32   | 29  | 27  |

|        |                                                                                                                                                                                                                     |                                   |     |     |     |     |
|--------|---------------------------------------------------------------------------------------------------------------------------------------------------------------------------------------------------------------------|-----------------------------------|-----|-----|-----|-----|
| Q6TXD4 | Dynamin-binding protein (Scaffold protein Tuba)                                                                                                                                                                     | Dnmbp (Kiaa1010)                  | 32  | 21  | 13  | 12  |
| P08730 | Keratin, type I cytoskeletal 13 (Cytokeratin-13) (CK-13) (Keratin-13) (K13) (47 kDa cytokeratin)                                                                                                                    | Krt13 (Krt1-13)                   | 37  | 46  | 13  | 12  |
| Q8R5G7 | Centaurin-delta-3 (Cnt-d3) (Arf-GAP, Rho-GAP, ankyrin repeat and pleckstrin homology domain-containing protein 3) (Dual specificity Rho- and Arf-GTPase-activating protein 1)                                       | Centd3 (Arap3) (Drag1) (Kiaa4097) | 21  | 27  | 26  | 24  |
| Q7TMY8 | E3 ubiquitin-protein ligase HUWE1 (EC 6.3.2.-) (HECT, UBA and WWE domain-containing protein 1) (Upstream regulatory element-binding protein 1) (URE-binding protein 1) (URE-B1) (E3Histone)                         | Huwe1 (Kiaa0312) (Ureb1)          | 33  | 91  | 39  | 36  |
| O35206 | Collagen alpha-1(XV) chain [Cleaved into: Endostatin (Endostatin-XV)]                                                                                                                                               | Col15a1                           | 31  | 37  | 12  | 11  |
| P35969 | Vascular endothelial growth factor receptor 1 (VEGFR-1) (EC 2.7.10.1) (Tyrosine-protein kinase receptor FLT) (FLT-1) (Embryonic receptor kinase 2)                                                                  | Flt1 (Emrk2) (Flt)                | 29  | 36  | 35  | 32  |
| Q01853 | Transitional endoplasmic reticulum ATPase (TER ATPase) (15S Mg(2+)-ATPase p97 subunit) (Valosin-containing protein) (VCP)                                                                                           | Vcp                               | 691 | 699 | 56  | 51  |
| P03995 | Glia fibrillary acidic protein (GFAP)                                                                                                                                                                               | Gfap                              | 63  | 90  | 22  | 20  |
| Q8CGC7 | Bifunctional aminoacyl-tRNA synthetase [Includes: Glutamyl-tRNA synthetase (EC 6.1.1.17) (Glutamate--tRNA ligase); Prolyl-tRNA synthetase (EC 6.1.1.15) (Proline--tRNA ligase)]                                     | Eprs (Qprs)                       | 130 | 102 | 32  | 29  |
| Q8VDD5 | Myosin-9 (Myosin heavy chain 9) (Myosin heavy chain, non-muscle IIa) (Non-muscle myosin heavy chain IIa) (NMMHC II-a) (NMMHC-IIA) (Cellular myosin heavy chain, type A) (Non-muscle myosin heavy chain-A) (NMMHC-A) | Myh9                              | 780 | 839 | 127 | 115 |



|        |                                                                                                                                                                                                                                |                                    |     |      |    |    |
|--------|--------------------------------------------------------------------------------------------------------------------------------------------------------------------------------------------------------------------------------|------------------------------------|-----|------|----|----|
| P43406 | Integrin alpha-V (Vitronectin receptor subunit alpha) (CD antigen CD51) [Cleaved into: Integrin alpha-V heavy chain; Integrin alpha-V light chain]                                                                             | Itgav                              | 23  | 35   | 19 | 17 |
| P02535 | Keratin, type I cytoskeletal 10 (Cytokeratin-10) (CK-10) (Keratin-10) (K10) (56 kDa cytokeratin) (Keratin, type I cytoskeletal 59 kDa)                                                                                         | Krt10 (Krt1-10)                    | 252 | 152  | 19 | 17 |
| Q925Q8 | Dachshund homolog 2 (Dach2)                                                                                                                                                                                                    | Dach2                              | 22  | 30   | 9  | 8  |
| Q9JIL4 | PDZ domain-containing protein 1 (CFTR-associated protein of 70 kDa) (Na/Pi cotransporter C-terminal-associated protein) (NaPi-Cap1) (Sodium-hydrogen exchanger regulatory factor 3) (Na(+)/H(+) exchanger regulatory factor 3) | Pdzk1 (Cap70) (Nherf3)             | 29  | 39   | 9  | 8  |
| P43277 | Histone H1.3 (H1 VAR.4) (H1d)                                                                                                                                                                                                  | Hist1h1d (H1f3)                    | 78  | 99   | 18 | 16 |
| P26041 | Moesin (Membrane-organizing extension spike protein)                                                                                                                                                                           | Msn                                | 136 | 127  | 44 | 39 |
| Q68FD5 | Clathrin heavy chain 1                                                                                                                                                                                                         | Cltc                               | 944 | 884  | 88 | 78 |
| Q99104 | Myosin-Va (Dilute myosin heavy chain, non-muscle)                                                                                                                                                                              | Myo5a (Dilute)                     | 28  | 34   | 35 | 31 |
| Q9R0P5 | Destrin (Actin-depolymerizing factor) (ADF) (Sid 23)                                                                                                                                                                           | Dstn (Dsn) (Sid23)                 | 61  | 81   | 8  | 7  |
| Q02053 | Ubiquitin-like modifier-activating enzyme 1 (Ubiquitin-activating enzyme E1) (Ubiquitin-like modifier-activating enzyme 1 X) (Ubiquitin-activating enzyme E1 X)                                                                | Uba1 (Sbx) (Ube1) (Ube1ax) (Ube1x) | 660 | 1086 | 63 | 55 |
| Q8CJ27 | Abnormal spindle-like microcephaly-associated protein homolog (Spindle and hydroxyurea checkpoint abnormal protein) (Calmodulin-binding protein Sha1) (Calmodulin binding protein 1)                                           | Aspm (Calmbp1) (Sha1)              | 35  | 23   | 55 | 48 |
| Q924C1 | Exportin-5 (Exp5) (Ran-binding protein 21)                                                                                                                                                                                     | Xpo5 (Kiaa1291) (Ranbp21)          | 20  | 62   | 15 | 13 |

|        |                                                                                                                                                                                                                                                      |                              |     |     |    |    |
|--------|------------------------------------------------------------------------------------------------------------------------------------------------------------------------------------------------------------------------------------------------------|------------------------------|-----|-----|----|----|
| Q9JJK8 | Serine/threonine-protein kinase ATR (EC 2.7.11.1) (Ataxia telangiectasia and Rad3-related protein)                                                                                                                                                   | Atr                          | 20  | 25  | 72 | 62 |
| Q63994 | Myeloid cell surface antigen CD33 (Sialic acid-binding Ig-like lectin 3) (Siglec-3) (CD antigen CD33)                                                                                                                                                | Cd33 (Siglec3)               | 34  | 34  | 7  | 6  |
| P35979 | 60S ribosomal protein L12                                                                                                                                                                                                                            | Rpl12                        | 208 | 389 | 14 | 12 |
| P97784 | Cryptochrome-1                                                                                                                                                                                                                                       | Cry1                         | 52  | 42  | 21 | 18 |
| Q9R194 | Cryptochrome-2                                                                                                                                                                                                                                       | Cry2 (Kiaa0658)              | 52  | 42  | 21 | 18 |
| P11881 | Inositol 1,4,5-trisphosphate receptor type 1 (Type 1 inositol 1,4,5-trisphosphate receptor) (Type 1 InsP3 receptor) (IP3 receptor isoform 1) (InsP3R1) (Inositol 1,4,5-trisphosphate-binding protein P400) (Purkinje cell protein 1) (Protein PCD-6) | Itpr1 (Insp3r) (Pcd6) (Pcp1) | 37  | 42  | 48 | 41 |
| Q9CQN1 | Heat shock protein 75 kDa, mitochondrial (HSP 75) (Tumor necrosis factor type 1 receptor-associated protein) (TRAP-1) (TNFR-associated protein 1)                                                                                                    | Trap1 (Hsp75)                | 197 | 335 | 13 | 11 |
| P20029 | 78 kDa glucose-regulated protein (GRP 78) (Heat shock 70 kDa protein 5) (Immunoglobulin heavy chain-binding protein) (BiP)                                                                                                                           | Hspa5 (Grp78)                | 262 | 312 | 25 | 21 |
| Q99PT1 | Rho GDP-dissociation inhibitor 1 (Rho GDI 1) (Rho-GDI alpha) (GDI-1)                                                                                                                                                                                 | Arhgdia (C87222) (Gdi1)      | 923 | 675 | 37 | 31 |
| Q9ES17 | Interleukin-21 (IL-21)                                                                                                                                                                                                                               | Il21                         | 22  | 25  | 6  | 5  |
| Q8R4U0 | Stabilin-2 (Fasciclin, EGF-like, laminin-type EGF-like and link domain-containing scavenger receptor 2) (FEEL-2) [Cleaved into: Short form stabilin-2]                                                                                               | Stab2 (Feel2)                | 25  | 43  | 12 | 10 |

|        |                                                                                                                                                                                                                                                                |                               |      |     |     |    |
|--------|----------------------------------------------------------------------------------------------------------------------------------------------------------------------------------------------------------------------------------------------------------------|-------------------------------|------|-----|-----|----|
| Q99PP7 | E3 ubiquitin-protein ligase TRIM33 (EC 6.3.2.-) (Tripartite motif-containing protein 33) (Transcription intermediary factor 1-gamma) (TIF1-gamma) (Ectodermin homolog)                                                                                         | Trim33 (Kiaa1113)             | 33   | 25  | 12  | 10 |
| P11983 | T-complex protein 1 subunit alpha B (TCP-1-alpha) (CCT-alpha) (Tailless complex polypeptide 1B) (TCP-1-B)                                                                                                                                                      | Cct1 (Ccta) (Tcp1)            | 29   | 66  | 18  | 15 |
| P20357 | Microtubule-associated protein 2 (MAP-2)                                                                                                                                                                                                                       | Map2 (Mtap2)                  | 50   | 22  | 30  | 25 |
| P11531 | Dystrophin                                                                                                                                                                                                                                                     | Dmd                           | 25   | 16  | 66  | 55 |
| P09405 | Nucleolin (Protein C23)                                                                                                                                                                                                                                        | Ncl (Nuc)                     | 775  | 872 | 78  | 65 |
| Q6URW6 | Myosin-14 (Myosin heavy chain 14) (Myosin heavy chain, non-muscle IIc) (Non-muscle myosin heavy chain IIc) (NMHC II-C)                                                                                                                                         | Myh14                         | 60   | 48  | 53  | 44 |
| Q8R429 | Sarcoplasmic/endoplasmic reticulum calcium ATPase 1 (SERCA1) (EC 3.6.3.8) (Calcium pump 1) (Calcium-transporting ATPase sarcoplasmic reticulum type, fast twitch skeletal muscle isoform) (SR Ca(2+)-ATPase 1) (Endoplasmic reticulum class 1/2 Ca(2+) ATPase) | Atp2a1                        | 25   | 17  | 17  | 14 |
| P80316 | T-complex protein 1 subunit epsilon (TCP-1-epsilon) (CCT-epsilon)                                                                                                                                                                                              | Cct5 (Ccte) (Kiaa0098)        | 239  | 102 | 17  | 14 |
| O55103 | Periaxin                                                                                                                                                                                                                                                       | Prx                           | 19   | 30  | 28  | 23 |
| P62259 | 14-3-3 protein epsilon (14-3-3E)                                                                                                                                                                                                                               | Ywhae                         | 1202 | 998 | 116 | 95 |
| Q6DFV7 | Nuclear receptor coactivator 7                                                                                                                                                                                                                                 | Ncoa7                         | 25   | 16  | 11  | 9  |
| Q6ZQ38 | Cullin-associated NEDD8-dissociated protein 1 (Cullin-associated and neddylation-dissociated protein 1) (p120 CAND1)                                                                                                                                           | Cand1 (D10Ert516e) (Kiaa0829) | 221  | 246 | 33  | 27 |
| P42227 | Signal transducer and activator of transcription 3 (Acute-phase response factor)                                                                                                                                                                               | Stat3 (Aprf)                  | 16   | 28  | 33  | 27 |

|        |                                                                                                                                                                                        |                                        |     |     |     |     |
|--------|----------------------------------------------------------------------------------------------------------------------------------------------------------------------------------------|----------------------------------------|-----|-----|-----|-----|
| Q64512 | Tyrosine-protein phosphatase non-receptor type 13 (EC 3.1.3.48) (Protein tyrosine phosphatase PTP-BL) (Protein-tyrosine phosphatase RIP) (Protein tyrosine phosphatase DPZPTP) (PTP36) | Ptpn13 (Ptp14)                         | 28  | 27  | 26  | 21  |
| Q5XJY5 | Coatomer subunit delta (Delta-coat protein) (Delta-COP) (Archain)                                                                                                                      | Arcn1 (Copd)                           | 61  | 45  | 10  | 8   |
| Q8VI47 | Canalicular multispecific organic anion transporter 1 (ATP-binding cassette sub-family C member 2)                                                                                     | Abcc2                                  | 31  | 38  | 39  | 31  |
| Q99MD9 | Nuclear autoantigenic sperm protein (NASP)                                                                                                                                             | Nasp                                   | 365 | 293 | 34  | 27  |
| Q91ZU6 | Bullous pemphigoid antigen 1, isoforms 1/2/3/4 (BPA) (Hemidesmosomal plaque protein) (Dystonia musculorum protein) (Dystonin)                                                          | Dst (Bpag1)                            | 78  | 38  | 126 | 100 |
| Q80T14 | Extracellular matrix protein FRAS1                                                                                                                                                     | Fras1 (Kiaa1500)                       | 48  | 109 | 24  | 19  |
| Q8C196 | Carbamoyl-phosphate synthase [ammonia], mitochondrial (EC 6.3.4.16) (Carbamoyl-phosphate synthetase I) (CPSase I)                                                                      | Cps1                                   | 22  | 25  | 19  | 15  |
| Q80ZI6 | E3 ubiquitin-protein ligase LRSAM1 (EC 6.3.2.-) (Leucine-rich repeat and sterile alpha motif-containing protein 1) (Tsg101-associated ligase)                                          | Lrsam1                                 | 19  | 35  | 19  | 15  |
| Q8CIQ7 | Dedicator of cytokinesis protein 3 (Modifier of cell adhesion) (Presenilin-binding protein) (PBP)                                                                                      | Dock3 (Moca)                           | 80  | 56  | 33  | 26  |
| Q9QWL7 | Keratin, type I cytoskeletal 17 (Cytokeratin-17) (CK-17) (Keratin-17) (K17)                                                                                                            | Krt17 (Krt1-17)                        | 38  | 46  | 14  | 11  |
| Q9JHU4 | Cytoplasmic dynein 1 heavy chain 1 (Cytoplasmic dynein heavy chain 1) (Dynein heavy chain, cytosolic)                                                                                  | Dync1h1 (Dhc1) (Dnch1) (Dnchc1) (Dyhc) | 822 | 395 | 157 | 123 |

|        |                                                                                                                                         |                                 |      |     |    |    |
|--------|-----------------------------------------------------------------------------------------------------------------------------------------|---------------------------------|------|-----|----|----|
| Q6A078 | Centrosomal protein of 290 kDa (Cep290) (Nephrocystin-6)                                                                                | Cep290 (Kiaa0373) (Nphp6)       | 32   | 57  | 85 | 66 |
| P31254 | Ubiquitin-like modifier-activating enzyme 1 Y (Ubiquitin-activating enzyme E1 Y) (Ubiquitin-activating enzyme E1)                       | Ube1ay (Sby) (Ube1y) (Ube1y1)   | 161  | 77  | 22 | 17 |
| P06151 | L-lactate dehydrogenase A chain (LDH-A) (EC 1.1.1.27) (LDH muscle subunit) (LDH-M)                                                      | Ldha (Ldh-1) (Ldh1)             | 1033 | 421 | 74 | 57 |
| P05063 | Fructose-bisphosphate aldolase C (EC 4.1.2.13) (Brain-type aldolase) (Aldolase 3) (Zebrin II) (Scrapie-responsive protein 2)            | Aldoc (Aldo3) (Scrg2)           | 35   | 51  | 13 | 10 |
| Q7TMK6 | Protein Hook homolog 2                                                                                                                  | Hook2                           | 33   | 36  | 26 | 20 |
| Q569Z6 | Thyroid hormone receptor-associated protein 3 (Thyroid hormone receptor-associated protein complex 150 kDa component) (Trap150)         | Thrap3 (Trap150)                | 29   | 48  | 21 | 16 |
| P39447 | Tight junction protein ZO-1 (Zonula occludens protein 1) (Zona occludens protein 1) (Tight junction protein 1)                          | Tjp1 (Zo1)                      | 36   | 15  | 21 | 16 |
| Q99MY8 | Probable histone-lysine N-methyltransferase ASH1L (EC 2.1.1.43) (Absent small and homeotic disks protein 1 homolog) (ASH1-like protein) | Ash1l                           | 19   | 31  | 46 | 35 |
| P97434 | Myosin phosphatase Rho-interacting protein (Rho-interacting protein 3) (RIP3) (p116Rip)                                                 | Mrip (Kiaa0864) (Mrip) (Rhoip3) | 35   | 23  | 25 | 19 |
| P70670 | Nascent polypeptide-associated complex subunit alpha, muscle-specific form (Alpha-NAC, muscle-specific form)                            | Naca (Gm1878)                   | 22   | 130 | 29 | 22 |
| Q9QYB1 | Chloride intracellular channel protein 4 (mc3s5/mtCLIC)                                                                                 | Clic4                           | 28   | 33  | 4  | 3  |
| P56480 | ATP synthase subunit beta, mitochondrial (EC 3.6.3.14)                                                                                  | Atp5b                           | 31   | 50  | 8  | 6  |

|        |                                                                                                                                      |                                                   |      |      |     |     |
|--------|--------------------------------------------------------------------------------------------------------------------------------------|---------------------------------------------------|------|------|-----|-----|
| Q02956 | Protein kinase C zeta type (EC 2.7.11.13) (nPKC-zeta)                                                                                | Prkcz (Pkcζ)                                      | 29   | 15   | 8   | 6   |
| P25233 | Necdin                                                                                                                               | Ndn                                               | 30   | 23   | 16  | 12  |
| O54887 | Testis-specific serine kinase substrate (Testis-specific kinase substrate) (STK22 substrate 1)                                       | Stk22s1 (Tsk)                                     | 50   | 21   | 16  | 12  |
| Q4VGL6 | Roquin (RING finger and C3H zinc finger protein 1) (Protein Sanroque)                                                                | Rc3h1 (Gm551) (Kiaa2025)                          | 54   | 54   | 23  | 17  |
| P58681 | Toll-like receptor 7                                                                                                                 | Tlr7                                              | 27   | 33   | 23  | 17  |
| P60710 | Actin, cytoplasmic 1 (Beta-actin)                                                                                                    | Actb                                              | 5140 | 4496 | 282 | 208 |
| Q8VBX6 | Multiple PDZ domain protein (Multi-PDZ domain protein 1)                                                                             | Mpdz (Mupp1)                                      | 17   | 29   | 38  | 28  |
| Q61656 | Probable ATP-dependent RNA helicase DDX5 (EC 3.6.1.-) (DEAD box protein 5) (RNA helicase p68) (DEAD box RNA helicase DEAD1) (mDEAD1) | Ddx5 (Tnz2)                                       | 90   | 43   | 11  | 8   |
| Q91Z67 | SLIT-ROBO Rho GTPase-activating protein 2 (srGAP2) (Formin-binding protein 2) (Formin-binding protein 27) (FBP-27)                   | Srgap2 (Fbp27) (Fnbp2)                            | 77   | 48   | 11  | 8   |
| P62991 | Ubiquitin                                                                                                                            | Rps27a (Uba80) (Ubcep1); Uba52 (Ubcep2); Ubb; Ubc | 61   | 54   | 11  | 8   |
| Q61696 | Heat shock 70 kDa protein 1A (Heat shock 70 kDa protein 3) (HSP70.3) (Hsp68)                                                         | Hspa1a (Hsp70-3) (Hsp70A1)                        | 266  | 236  | 33  | 24  |
| Q61699 | Heat shock protein 105 kDa (Heat shock-related 100 kDa protein E7I) (HSP-E7I) (Heat shock 110 kDa protein) (42 degrees C-HSP)        | Hsph1 (Hsp105) (Hsp110) (Kiaa0201)                | 46   | 48   | 18  | 13  |
| Q60673 | Receptor-type tyrosine-protein phosphatase-like N (R-PTP-N) (PTP IA-2)                                                               | Ptpn (Ptp35)                                      | 30   | 18   | 14  | 10  |

|        |                                                                                                                                                                               |                              |      |      |     |     |
|--------|-------------------------------------------------------------------------------------------------------------------------------------------------------------------------------|------------------------------|------|------|-----|-----|
| Q03172 | Zinc finger protein 40 (Transcription factor alphaA-CRYBP1) (Alpha A-crystallin-binding protein I) (Alpha A-CRYBP1)                                                           | Hivep1 (Cryabp1) (Znf40)     | 25   | 24   | 21  | 15  |
| P08551 | Neurofilament light polypeptide (NF-L) (Neurofilament triplet L protein) (68 kDa neurofilament protein)                                                                       | Nefl (Nf68) (Nfl)            | 51   | 36   | 17  | 12  |
| Q52KI8 | Serine/arginine repetitive matrix protein 1 (Plenty-of-prolines 101)                                                                                                          | Srrm1 (Pop101)               | 22   | 73   | 29  | 20  |
| Q99PV0 | Pre-mRNA-processing-splicing factor 8 (Splicing factor Prp8)                                                                                                                  | Prpf8 (Prp8)                 | 28   | 29   | 51  | 35  |
| P68040 | Guanine nucleotide-binding protein subunit beta-2-like 1 (Receptor of activated protein kinase C 1) (RACK1) (Receptor for activated C kinase) (p205) (12-3)                   | Gnb2l1 (Gnb2-rs1)            | 541  | 153  | 35  | 24  |
| P99024 | Tubulin beta-5 chain                                                                                                                                                          | Tubb5                        | 1377 | 976  | 88  | 60  |
| O88799 | Zonadhesin                                                                                                                                                                    | Zan                          | 22   | 26   | 25  | 17  |
| Q80TP3 | E3 ubiquitin-protein ligase UBR5 (EC 6.3.2.-) (E3 ubiquitin-protein ligase, HECT domain-containing 1) (Hyperplastic discs protein homolog)                                    | Ubr5 (Edd) (Edd1) (Kiaa0896) | 27   | 17   | 43  | 29  |
| Q6PHN9 | Ras-related protein Rab-35                                                                                                                                                    | Rab35                        | 17   | 59   | 3   | 2   |
| Q8C9S8 | Cysteine protease ATG4A (EC 3.4.22.-) (Autophagy-related protein 4 homolog A) (Autophagin-2) (Autophagy-related cysteine endopeptidase 2) (AUT-like 2 cysteine endopeptidase) | Atg4a (Apg4a) (Autl2)        | 26   | 21   | 6   | 4   |
| P61979 | Heterogeneous nuclear ribonucleoprotein K (hnRNP K)                                                                                                                           | Hnrnpk (Hnrpk)               | 225  | 46   | 18  | 12  |
| Q8K4L3 | Supervillin (Archvillin) (p205/p250)                                                                                                                                          | Svil                         | 25   | 22   | 18  | 12  |
| P61164 | Alpha-centractin (Centractin) (Centrosome-associated actin homolog) (Actin-RPV) (ARP1)                                                                                        | Actr1a (Ctrn1)               | 247  | 124  | 27  | 18  |
| P68033 | Actin, alpha cardiac muscle 1 (Alpha-cardiac actin)                                                                                                                           | Actc1 (Actc)                 | 3948 | 2726 | 234 | 155 |

|        |                                                                                                                                                                         |                                    |     |     |    |    |
|--------|-------------------------------------------------------------------------------------------------------------------------------------------------------------------------|------------------------------------|-----|-----|----|----|
| O88444 | Adenylate cyclase type 1 (EC 4.6.1.1) (Adenylate cyclase type I) (ATP pyrophosphate-lyase 1) (Adenylyl cyclase 1) (Ca(2+)/calmodulin-activated adenylyl cyclase)        | Adcy1                              | 33  | 31  | 26 | 17 |
| P42932 | T-complex protein 1 subunit theta (TCP-1-theta) (CCT-theta)                                                                                                             | Cct8 (Cctq)                        | 197 | 57  | 23 | 15 |
| Q924W6 | Tripartite motif-containing protein 66 (Transcriptional intermediary factor 1 delta)                                                                                    | Trim66 (Tif1d)                     | 28  | 18  | 23 | 15 |
| O70435 | Proteasome subunit alpha type-3 (EC 3.4.25.1) (Proteasome component C8) (Macropain subunit C8) (Multicatalytic endopeptidase complex subunit C8) (Proteasome subunit K) | Psma3                              | 95  | 76  | 14 | 9  |
| P61161 | Actin-related protein 2 (Actin-like protein 2)                                                                                                                          | Actr2 (Arp2)                       | 247 | 124 | 28 | 18 |
| Q8CG48 | Structural maintenance of chromosomes protein 2 (Chromosome-associated protein E) (XCAP-E homolog) (FGF-inducible protein 16)                                           | Smc2 (Cape) (Fin16) (Smc2l1)       | 32  | 36  | 41 | 26 |
| Q80U87 | Ubiquitin carboxyl-terminal hydrolase 8 (EC 3.1.2.15) (Ubiquitin thioesterase 8) (Ubiquitin-specific-processing protease 8) (Deubiquitinating enzyme 8) (mUBPy)         | Usp8 (Kiaa0055) (Ubpy)             | 29  | 23  | 24 | 15 |
| P17156 | Heat shock-related 70 kDa protein 2 (Heat shock protein 70.2)                                                                                                           | Hspa2 (Hcp70.2) (Hsp70-2)          | 964 | 544 | 60 | 37 |
| Q68ED2 | Metabotropic glutamate receptor 7 (mGluR7)                                                                                                                              | Grm7 (Gprc1g) (Mglur7)             | 37  | 33  | 13 | 8  |
| O35551 | Rab GTPase-binding effector protein 1 (Rabaptin-5) (Rabaptin-5alpha)                                                                                                    | Rabep1 (Rab5ep) (Rabpt5) (Rabpt5a) | 33  | 26  | 26 | 16 |



|        |                                                                                                                                                                                                                               |                             |      |     |     |    |
|--------|-------------------------------------------------------------------------------------------------------------------------------------------------------------------------------------------------------------------------------|-----------------------------|------|-----|-----|----|
| Q61879 | Myosin-10 (Myosin heavy chain 10) (Myosin heavy chain, non-muscle IIb) (Non-muscle myosin heavy chain IIb) (NMMHC II-b) (NMMHC-IIB) (Cellular myosin heavy chain, type B) (Non-muscle myosin heavy chain-B) (NMMHC-B)         | Myh10                       | 122  | 101 | 65  | 40 |
| O35344 | Importin subunit alpha-3 (Karyopherin subunit alpha-3) (Importin alpha Q2) (Qip2)                                                                                                                                             | Kpna3 (Qip2)                | 24   | 28  | 10  | 6  |
| Q9Z0P5 | Twinfilin-2 (Twinfilin-1-like protein) (A6-related protein) (mA6RP)                                                                                                                                                           | Twf2 (Ptk9I)                | 29   | 32  | 10  | 6  |
| Q9EQZ6 | Rap guanine nucleotide exchange factor 4 (cAMP-regulated guanine nucleotide exchange factor II) (cAMP-GEFII) (Exchange factor directly activated by cAMP 2) (Epac 2) (cAMP-dependent Rap1 guanine-nucleotide exchange factor) | Rapgef4 (Cgef2) (Epac2)     | 47   | 23  | 20  | 12 |
| Q6NZJ6 | Eukaryotic translation initiation factor 4 gamma 1 (eIF-4-gamma 1) (eIF-4G 1) (eIF-4G1)                                                                                                                                       | Eif4g1                      | 47   | 113 | 30  | 18 |
| P26040 | Ezrin (p81) (Cytovillin) (Villin-2)                                                                                                                                                                                           | Ezr (Vil2)                  | 127  | 106 | 27  | 16 |
| P63038 | 60 kDa heat shock protein, mitochondrial (Heat shock protein 60) (HSP-60) (Hsp60) (60 kDa chaperonin) (Chaperonin 60) (CPN60) (Mitochondrial matrix protein P1) (HSP-65)                                                      | Hspd1 (Hsp60)               | 15   | 32  | 22  | 13 |
| P80317 | T-complex protein 1 subunit zeta (TCP-1-zeta) (CCT-zeta) (CCT-zeta-1)                                                                                                                                                         | Cct6a (Cct6) (Cctz) (Cctz1) | 160  | 52  | 22  | 13 |
| P10630 | Eukaryotic initiation factor 4A-II (eIF-4A-II) (eIF4A-II) (EC 3.6.1.-) (ATP-dependent RNA helicase eIF4A-2)                                                                                                                   | Eif4a2 (Ddx2b)              | 194  | 78  | 17  | 10 |
| P63017 | Heat shock cognate 71 kDa protein (Heat shock 70 kDa protein 8)                                                                                                                                                               | Hspa8 (Hsc70) (Hsc73)       | 1719 | 959 | 119 | 70 |

|        |                                                                                                                                                      |                             |     |     |    |    |
|--------|------------------------------------------------------------------------------------------------------------------------------------------------------|-----------------------------|-----|-----|----|----|
| P05532 | Mast/stem cell growth factor receptor (SCFR) (EC 2.7.10.1) (Proto-oncogene tyrosine-protein kinase Kit) (c-kit) (CD antigen CD117)                   | Kit (SI)                    | 16  | 35  | 12 | 7  |
| Q9JI78 | Peptide-N(4)-(N-acetyl-beta-glucosaminy)asparagine amidase (PNGase) (mPNGase) (EC 3.5.1.52) (Peptide:N-glycanase) (N-glycanase 1)                    | Ngly1                       | 29  | 32  | 19 | 11 |
| Q9CZX8 | 40S ribosomal protein S19                                                                                                                            | Rps19                       | 206 | 146 | 19 | 11 |
| P53762 | Aryl hydrocarbon receptor nuclear translocator (ARNT protein) (Dioxin receptor, nuclear translocator) (Hypoxia-inducible factor 1 beta) (HIF-1 beta) | Arnt                        | 25  | 22  | 7  | 4  |
| P47757 | F-actin-capping protein subunit beta (CapZ beta)                                                                                                     | Capzb (Cappb1)              | 107 | 68  | 7  | 4  |
| P97287 | Induced myeloid leukemia cell differentiation protein Mcl-1 homolog (Bcl-2-related protein EAT/mcl1)                                                 | Mcl1                        | 26  | 30  | 7  | 4  |
| P26043 | Radixin (ESP10)                                                                                                                                      | Rdx                         | 127 | 106 | 23 | 13 |
| Q9R1X4 | Protein timeless homolog (mTim)                                                                                                                      | Timeless (Tim1) (Timeless1) | 22  | 25  | 16 | 9  |
| Q9Z1Q5 | Chloride intracellular channel protein 1 (Nuclear chloride ion channel 27) (NCC27)                                                                   | Clic1                       | 137 | 139 | 9  | 5  |
| P63073 | Eukaryotic translation initiation factor 4E (eIF-4E) (eIF4E) (mRNA cap-binding protein) (eIF-4F 25 kDa subunit)                                      | Eif4e                       | 110 | 25  | 9  | 5  |
| P17918 | Proliferating cell nuclear antigen (PCNA) (Cyclin)                                                                                                   | Pcna                        | 273 | 207 | 20 | 11 |
| O35664 | Interferon-alpha/beta receptor beta chain (Interferon alpha/beta receptor 2) (IFN-alpha-REC) (Type I interferon receptor) (IFN-R)                    | Ifnar2                      | 37  | 21  | 11 | 6  |
| Q9WV89 | Syntaxin-binding protein 4 (Syntaxin 4-interacting protein) (Synip) (STX4-interacting protein)                                                       | Stxbp4                      | 41  | 19  | 11 | 6  |
| Q9WUJ8 | Origin recognition complex subunit 6                                                                                                                 | Orc6l (Orc6)                | 59  | 37  | 13 | 7  |

|         |        |                                                                                                                                          |                                |     |      |    |    |
|---------|--------|------------------------------------------------------------------------------------------------------------------------------------------|--------------------------------|-----|------|----|----|
|         | Q61390 | T-complex protein 1 subunit zeta-2 (TCP-1-zeta-2) (CCT-zeta-2) (Cctz-2)                                                                  | Cct6b                          | 55  | 52   | 15 | 8  |
|         | P11103 | Poly [ADP-ribose] polymerase 1 (PARP-1) (EC 2.4.2.30) (ADPRT) (NAD(+) ADP-ribosyltransferase 1) (Poly[ADP-ribose] synthetase 1) (msPARP) | Parp1 (Adprp) (Adprt) (Adprt1) | 21  | 26   | 17 | 9  |
|         | P97351 | 40S ribosomal protein S3a                                                                                                                | Rps3a                          | 899 | 392  | 50 | 26 |
|         | Q80UE6 | Serine/threonine-protein kinase WNK4 (EC 2.7.11.1) (Protein kinase with no lysine 4) (Protein kinase, lysine-deficient 4)                | Wnk4 (Prkwk4)                  | 23  | 33   | 29 | 15 |
| binding | Q3TCT4 | Ectonucleoside triphosphate diphosphohydrolase 7 (NTPDase 7) (EC 3.6.1.7) (Lysosomal apyrase-like protein 1)                             | Entpd7 (Kiaa4066) (Lalp1)      | 16  | 33   | 42 | 80 |
|         | P97311 | DNA replication licensing factor MCM6 (Mis5 homolog)                                                                                     | Mcm6 (Mcmd6) (Mis5)            | 110 | 395  | 20 | 38 |
|         | O88705 | Potassium/sodium hyperpolarization-activated cyclic nucleotide-gated channel 3 (Hyperpolarization-activated cation channel 3) (HAC-3)    | Hcn3 (Hac3)                    | 75  | 67   | 8  | 15 |
|         | Q8BTM8 | Filamin-A (Alpha-filamin) (Filamin-1) (Endothelial actin-binding protein) (Actin-binding protein 280) (ABP-280) (Non-muscle filamin)     | Flna (Fln) (Fln1)              | 254 | 1031 | 46 | 86 |
|         | P06745 | Glucose-6-phosphate isomerase (GPI) (EC 5.3.1.9) (Phosphoglucose isomerase) (PGI) (Phosphohexose isomerase) (PHI) (Neuroleukin) (NLK)    | Gpi (Gpi1)                     | 39  | 107  | 12 | 22 |
|         | Q8R3C6 | Probable RNA-binding protein 19 (RNA-binding motif protein 19)                                                                           | Rbm19                          | 26  | 32   | 11 | 20 |
|         | Q7TSG3 | F-box only protein 5 (Early mitotic inhibitor 1)                                                                                         | Fbxo5 (Emi1)                   | 15  | 27   | 5  | 9  |
|         | Q62159 | Rho-related GTP-binding protein RhoC (Silica-induced gene 61 protein) (SIG-61)                                                           | Rhoc (Arhc)                    | 33  | 173  | 5  | 9  |
|         | Q99N50 | Synaptotagmin-like protein 2 (Exophilin-4)                                                                                               | Syt12 (Slp2)                   | 26  | 77   | 10 | 18 |

|        |                                                                                                                                                                                                       |                       |     |      |    |     |
|--------|-------------------------------------------------------------------------------------------------------------------------------------------------------------------------------------------------------|-----------------------|-----|------|----|-----|
| Q8BYC6 | Serine/threonine-protein kinase TAO3 (EC 2.7.11.1) (Thousand and one amino acid protein 3)                                                                                                            | Taok3                 | 32  | 38   | 9  | 16  |
| P03987 | Ig gamma-3 chain C region                                                                                                                                                                             |                       | 30  | 34   | 4  | 7   |
| Q61414 | Keratin, type I cytoskeletal 15 (Cytokeratin-15) (CK-15) (Keratin-15) (K15)                                                                                                                           | Krt15 (Krt1-15)       | 37  | 46   | 4  | 7   |
| P62962 | Profilin-1 (Profilin I)                                                                                                                                                                               | Pfn1                  | 30  | 93   | 4  | 7   |
| O35381 | Acidic leucine-rich nuclear phosphoprotein 32 family member A (Potent heat-stable protein phosphatase 2A inhibitor I1PP2A) (Acidic nuclear phosphoprotein pp32) (Leucine-rich acidic nuclear protein) | Anp32a (Anp32) (Lanp) | 36  | 112  | 8  | 14  |
| P56198 | Cell death activator CIDE-3 (Cell death-inducing DFFA-like effector protein C) (Fat-specific protein FSP27)                                                                                           | Cidec (Fsp27)         | 51  | 39   | 8  | 14  |
| P18760 | Cofilin-1 (Cofilin, non-muscle isoform)                                                                                                                                                               | Cfl1                  | 959 | 2552 | 70 | 122 |
| P17742 | Peptidyl-prolyl cis-trans isomerase A (PPIase A) (Rotamase A) (EC 5.2.1.8) (Cyclophilin A) (Cyclosporin A-binding protein) (SP18)                                                                     | Ppia                  | 855 | 1549 | 38 | 66  |
| Q8QZR5 | Alanine aminotransferase 1 (ALT1) (EC 2.6.1.2) (Glutamic--pyruvic transaminase 1) (Glutamate pyruvate transaminase 1) (GPT 1) (Glutamic--alanine transaminase 1)                                      | Gpt (Gpt1)            | 25  | 20   | 15 | 26  |
| Q9Z1R2 | Large proline-rich protein BAT3 (HLA-B-associated transcript 3)                                                                                                                                       | Bat3                  | 80  | 49   | 15 | 26  |
| Q9R117 | Non-receptor tyrosine-protein kinase TYK2 (EC 2.7.10.2)                                                                                                                                               | Tyk2                  | 27  | 30   | 15 | 26  |
| Q9D009 | Putative octanoyltransferase, mitochondrial (EC 2.3.1.181) (Octanoyl-[acyl-carrier-protein]-protein N-octanoyltransferase) (Lipoyl/octanoyl transferase) (Lipoate-protein ligase B)                   |                       | 38  | 42   | 11 | 19  |
| Q8R1S0 | Ubiquinone biosynthesis monooxygenase COQ6 (EC 1.14.13.-)                                                                                                                                             | Coq6                  | 42  | 92   | 10 | 17  |

|        |                                                                                                                                                                                                                                                         |                                         |      |      |     |     |
|--------|---------------------------------------------------------------------------------------------------------------------------------------------------------------------------------------------------------------------------------------------------------|-----------------------------------------|------|------|-----|-----|
| Q8BFQ9 | Kelch domain-containing protein 5                                                                                                                                                                                                                       | Klhdc5<br>(Kiaa1340)                    | 30   | 22   | 10  | 17  |
| Q9Z129 | ATP-dependent DNA helicase Q1 (EC 3.6.1.-)<br>(DNA-dependent ATPase Q1)                                                                                                                                                                                 | Recql (Recql1)                          | 17   | 27   | 13  | 22  |
| Q9ERK4 | Exportin-2 (Exp2) (Importin-alpha re-exporter)<br>(Chromosome segregation 1-like protein)                                                                                                                                                               | Cse1l (Xpo2)                            | 42   | 153  | 26  | 44  |
| P52480 | Pyruvate kinase isozymes M1/M2 (EC<br>2.7.1.40) (Pyruvate kinase muscle isozyme)                                                                                                                                                                        | Pkm2 (Pk3)<br>(Pykm)                    | 1954 | 3481 | 138 | 233 |
| Q8CGP2 | Histone H2B type 1-P                                                                                                                                                                                                                                    | Hist1h2bp                               | 436  | 999  | 46  | 77  |
| Q9Z309 | Calcium and integrin-binding family member 2<br>(Kinase-interacting protein 2) (KIP 2)                                                                                                                                                                  | Cib2 (Kip2)                             | 31   | 17   | 3   | 5   |
| P57776 | Elongation factor 1-delta (EF-1-delta)                                                                                                                                                                                                                  | Eef1d                                   | 109  | 35   | 3   | 5   |
| P62960 | Nuclease-sensitive element-binding protein 1<br>(Y-box-binding protein 1) (Y-box transcription<br>factor) (YB-1) (CCAAT-binding transcription<br>factor I subunit A) (CBF-A) (Enhancer factor I<br>subunit A) (EFI-A) (DNA-binding protein B)<br>(DBPB) | Ybx1 (Msy-1)<br>(Msy1)<br>(Nsep1) (Yb1) | 56   | 126  | 6   | 10  |
| P63143 | Voltage-gated potassium channel subunit beta-<br>1 (K(+)) channel subunit beta-1) (Kv-beta-1)                                                                                                                                                           | Kcnab1 (Kvb1)                           | 29   | 76   | 12  | 20  |

|        |                                                                                                                                                                          |                                                                                                                                                                               |     |      |    |    |
|--------|--------------------------------------------------------------------------------------------------------------------------------------------------------------------------|-------------------------------------------------------------------------------------------------------------------------------------------------------------------------------|-----|------|----|----|
| P62806 | Histone H4                                                                                                                                                               | Hist1h4a;<br>Hist1h4b (H4-53); Hist1h4c (H4-12);<br>Hist1h4d;<br>Hist1h4f;<br>Hist1h4h;<br>Hist1h4i;<br>Hist1h4j;<br>Hist1h4k;<br>Hist1h4m;<br>Hist2h4a (Hist2h4);<br>Hist4h4 | 815 | 1617 | 47 | 78 |
| Q922U2 | Keratin, type II cytoskeletal 5 (Cytokeratin-5) (CK-5) (Keratin-5) (K5)                                                                                                  | Krt5 (Krt2-5)                                                                                                                                                                 | 396 | 550  | 23 | 38 |
| Q64475 | Histone H2B type 1-B (h2B-143)                                                                                                                                           | Hist1h2bb                                                                                                                                                                     | 436 | 999  | 46 | 75 |
| P15532 | Nucleoside diphosphate kinase A (NDP kinase A) (NDK A) (EC 2.7.4.6) (Tumor metastatic process-associated protein) (Metastasis inhibition factor NM23) (NDPK-A) (nm23-M1) | Nme1 (Nm23)                                                                                                                                                                   | 150 | 261  | 8  | 13 |
| Q8BHG1 | Nardilysin (EC 3.4.24.61) (N-arginine dibasic convertase) (NRD convertase) (NRD-C)                                                                                       | Nrd1                                                                                                                                                                          | 53  | 54   | 13 | 21 |
| Q8BGT5 | Alanine aminotransferase 2 (ALT2) (EC 2.6.1.2) (Glutamic--pyruvic transaminase 2) (Glutamate pyruvate transaminase 2) (GPT 2) (Glutamic--alanine transaminase 2)         | Gpt2 (Aat2)                                                                                                                                                                   | 25  | 20   | 15 | 24 |
| Q501J6 | Probable ATP-dependent RNA helicase DDX17 (EC 3.6.1.-) (DEAD box protein 17)                                                                                             | Ddx17                                                                                                                                                                         | 90  | 43   | 7  | 11 |
| Q6ZWX6 | Eukaryotic translation initiation factor 2 subunit 1 (Eukaryotic translation initiation factor 2 subunit alpha) (eIF-2-alpha) (EIF-2alpha) (EIF-2A)                      | Eif2s1 (Eif2a)                                                                                                                                                                | 27  | 177  | 7  | 11 |

|        |                                                                                                                                                                   |                                   |     |     |    |    |
|--------|-------------------------------------------------------------------------------------------------------------------------------------------------------------------|-----------------------------------|-----|-----|----|----|
| Q80Y17 | Lethal(2) giant larvae protein homolog 1 (LLGL) (Mlgl) (Mgl-1)                                                                                                    | Llg1 (Llg1h)                      | 30  | 29  | 7  | 11 |
| Q61990 | Poly(rC)-binding protein 2 (Alpha-CP2) (Putative heterogeneous nuclear ribonucleoprotein X) (hnRNP X) (CTBP) (CBP)                                                | Pcbp2 (Cbp) (HnrnpX) (Hnrpx)      | 29  | 194 | 7  | 11 |
| P63001 | Ras-related C3 botulinum toxin substrate 1 (p21-Rac1)                                                                                                             | Rac1                              | 31  | 99  | 7  | 11 |
| P62082 | 40S ribosomal protein S7                                                                                                                                          | Rps7                              | 104 | 126 | 9  | 14 |
| P14824 | Annexin A6 (Annexin-6) (Annexin VI) (Lipocortin VI) (p68) (p70) (Protein III) (Chromobindin-20) (67 kDa calelectrin) (Calphobindin-II) (CPB-II)                   | Anxa6 (Anx6)                      | 168 | 591 | 33 | 51 |
| Q9Z1S0 | Mitotic checkpoint serine/threonine-protein kinase BUB1 beta (EC 2.7.11.1) (MAD3/BUB1-related protein kinase) (Mitotic checkpoint kinase MAD3L)                   | Bub1b (Mad3l)                     | 20  | 41  | 15 | 23 |
| P63158 | High mobility group protein B1 (High mobility group protein 1) (HMG-1)                                                                                            | Hmgb1 (Hmg-1) (Hmg1)              | 153 | 405 | 25 | 38 |
| Q8K386 | Ras-related protein Rab-15                                                                                                                                        | Rab15                             | 44  | 74  | 4  | 6  |
| O55142 | 60S ribosomal protein L35a                                                                                                                                        | Rpl35a                            | 24  | 50  | 4  | 6  |
| P16045 | Galectin-1 (Lectin galactoside-binding soluble 1) (Beta-galactoside-binding lectin L-14-I) (Lactose-binding lectin 1) (S-Lac lectin 1) (Galaptin) (14 kDa lectin) | Lgals1 (Gbp)                      | 79  | 85  | 6  | 9  |
| Q7TN83 | Synaptotagmin-16 (Synaptotagmin XIV-related protein) (Synaptotagmin 14-like protein)                                                                              | Syt16 (Strep14) (Syt14l) (Syt14r) | 20  | 38  | 6  | 9  |
| Q8BUG5 | Calcyphosin-2 (Calcyphosine-2)                                                                                                                                    | Caps2                             | 17  | 28  | 8  | 12 |
| P50247 | Adenosylhomocysteinase (AdoHcyase) (EC 3.3.1.1) (S-adenosyl-L-homocysteine hydrolase) (Liver copper-binding protein) (CUBP)                                       | Ahcy                              | 90  | 106 | 10 | 15 |

|        |                                                                                                                                                      |                                        |     |     |    |    |
|--------|------------------------------------------------------------------------------------------------------------------------------------------------------|----------------------------------------|-----|-----|----|----|
| Q99K85 | Phosphoserine aminotransferase (PSAT) (EC 2.6.1.52) (Phosphohydroxythreonine aminotransferase) (Endometrial progesterone-induced protein) (EPIP)     | Psat1 (Psa)<br>(Psat)                  | 162 | 541 | 16 | 24 |
| P83741 | Serine/threonine-protein kinase WNK1 (EC 2.7.11.1) (Protein kinase with no lysine 1) (Protein kinase, lysine-deficient 1)                            | Wnk1<br>(Prkwnk1)                      | 56  | 36  | 18 | 27 |
| P61982 | 14-3-3 protein gamma                                                                                                                                 | Ywhag                                  | 653 | 841 | 53 | 79 |
| P53657 | Pyruvate kinase isozymes R/L (EC 2.7.1.40) (L PK)                                                                                                    | Pklr                                   | 144 | 270 | 26 | 38 |
| P97868 | Retinoblastoma-binding protein 6 (p53-associated cellular protein of testis) (Proliferation potential-related protein) (Protein P2P-R)               | Rbbp6 (P2pr)<br>(Pact)                 | 21  | 29  | 24 | 35 |
| Q3THW5 | Histone H2A.V (H2A.F/Z)                                                                                                                              | H2afv (H2av)                           | 297 | 426 | 11 | 16 |
| P60335 | Poly(rC)-binding protein 1 (Alpha-CP1) (hnRNP-E1)                                                                                                    | Pcbp1                                  | 56  | 350 | 9  | 13 |
| P35761 | Dual specificity protein kinase TTK (ESK) (PYT) (EC 2.7.12.1)                                                                                        | Ttk (Esk)                              | 14  | 34  | 9  | 13 |
| O70251 | Elongation factor 1-beta (EF-1-beta)                                                                                                                 | Eef1b<br>(Eef1b2)                      | 39  | 102 | 7  | 10 |
| Q00342 | FL cytokine receptor (EC 2.7.10.1) (Tyrosine-protein kinase receptor flk-2) (Fetal liver kinase 2) (Tyrosine-protein kinase FLT3) (CD antigen CD135) | Flt3 (Flk-2) (Flt3)                    | 17  | 34  | 7  | 10 |
| P12813 | Nuclear receptor subfamily 4 group A member 1 (Orphan nuclear receptor HMR) (Nuclear hormone receptor NUR/77) (N10 nuclear protein)                  | Nr4a1 (Gfrp)<br>(Hmr) (N10)<br>(Nur77) | 61  | 31  | 7  | 10 |
| Q9WVP9 | Interferon-induced GTP-binding protein Mx2 (Myxovirus resistance protein 2)                                                                          | Mx2                                    | 32  | 22  | 14 | 20 |
| P07744 | Keratin, type II cytoskeletal 4 (Cytokeratin-4) (CK-4) (Keratin-4) (K4) (Cytoskeletal 57 kDa keratin)                                                | Krt4 (Krt2-4)                          | 36  | 74  | 19 | 27 |



|        |                                                                                                                                                                                                                                                       |                                |      |      |    |    |
|--------|-------------------------------------------------------------------------------------------------------------------------------------------------------------------------------------------------------------------------------------------------------|--------------------------------|------|------|----|----|
| Q9Z1F9 | SUMO-activating enzyme subunit 2 (EC 6.3.2.-) (Ubiquitin-like 1-activating enzyme E1B) (Anthracycline-associated resistance ARX)                                                                                                                      | Uba2 (Sae2) (Uble1b)           | 62   | 77   | 10 | 14 |
| Q8VHX6 | Filamin-C (Gamma-filamin) (Filamin-2) (FLN-C) (Actin-binding-like protein) (ABP-L) (ABP-280-like protein)                                                                                                                                             | Finc (Abpl) (Fln2)             | 33   | 115  | 18 | 25 |
| P68510 | 14-3-3 protein eta                                                                                                                                                                                                                                    | Ywhah                          | 707  | 962  | 58 | 80 |
| P70696 | Histone H2B type 1-A (Histone H2B, testis) (Testis-specific histone H2B)                                                                                                                                                                              | Hist1h2ba (Th2b)               | 146  | 378  | 37 | 51 |
| P05214 | Tubulin alpha-3 chain (Tubulin alpha-3/alpha-7 chain) (Alpha-tubulin 3/7) (Alpha-tubulin isotype M-alpha-3/7)                                                                                                                                         | Tuba3a (Tuba3); Tuba3b (Tuba7) | 1112 | 1288 | 61 | 84 |
| P17047 | Lysosome-associated membrane glycoprotein 2 (LAMP-2) (Lysosomal membrane glycoprotein type B) (LGP-B) (CD107 antigen-like family member B) (CD antigen CD107b)                                                                                        | Lamp2 (Lamp-2)                 | 26   | 29   | 8  | 11 |
| P27641 | ATP-dependent DNA helicase 2 subunit 2 (EC 3.6.1.-) (ATP-dependent DNA helicase II 80 kDa subunit) (Ku autoantigen protein p86 homolog) (Ku80) (CTC box-binding factor 85 kDa subunit) (CTCBF) (CTC85) (Nuclear factor IV) (DNA repair protein XRCC5) | Xrcc5 (G22p2)                  | 22   | 29   | 16 | 22 |
| Q61937 | Nucleophosmin (NPM) (Nucleolar phosphoprotein B23) (Numatrin) (Nucleolar protein NO38)                                                                                                                                                                | Npm1                           | 92   | 66   | 11 | 15 |
| Q8K298 | Actin-binding protein anillin                                                                                                                                                                                                                         | Anln                           | 16   | 28   | 17 | 23 |
| P70338 | Zinc finger protein Gfi-1 (Growth factor independent protein 1)                                                                                                                                                                                       | Gfi1 (Gfi-1)                   | 45   | 39   | 17 | 23 |
| Q61789 | Laminin subunit alpha-3 (Nicein subunit alpha)                                                                                                                                                                                                        | Lama3                          | 26   | 26   | 37 | 50 |
| Q9EPL8 | Importin-7 (Imp7) (Ran-binding protein 7) (RanBP7)                                                                                                                                                                                                    | Ipo7 (Ranbp7)                  | 25   | 121  | 9  | 12 |

|        |                                                                                                                                                                                                                                                                                        |                        |     |     |    |    |
|--------|----------------------------------------------------------------------------------------------------------------------------------------------------------------------------------------------------------------------------------------------------------------------------------------|------------------------|-----|-----|----|----|
| Q9WTX2 | Interferon-inducible double stranded RNA-dependent protein kinase activator A (Protein kinase, interferon-inducible double stranded RNA-dependent activator) (Protein activator of the interferon-induced protein kinase) (PKR-associated protein X) (PKR-associating protein X) (RAX) | Prkra (Rax)            | 28  | 39  | 9  | 12 |
| Q640P2 | Angiopoietin-related protein 1 (Angiopoietin-like 1)                                                                                                                                                                                                                                   | Angptl1                | 55  | 41  | 21 | 28 |
| Q9ERU9 | E3 SUMO-protein ligase RanBP2 (Ran-binding protein 2)                                                                                                                                                                                                                                  | Ranbp2                 | 56  | 49  | 40 | 53 |
| P70296 | Phosphatidylethanolamine-binding protein 1 (PEBP-1) (HCNPPp) [Cleaved into: Hippocampal cholinergic neurostimulating peptide (HCNP)]                                                                                                                                                   | Pebp1 (Pbp) (Pebp)     | 532 | 730 | 25 | 33 |
| Q5SXJ3 | Fanconi anemia group J protein homolog (Protein FACJ) (EC 3.6.1.-) (ATP-dependent RNA helicase BRIP1) (BRCA1-interacting protein C-terminal helicase 1) (BRCA1-interacting protein 1) (BRCA1-associated C-terminal helicase 1)                                                         | Brip1 (Bach1) (Fancj)  | 25  | 18  | 13 | 17 |
| P70168 | Importin subunit beta-1 (Karyopherin subunit beta-1) (Nuclear factor P97) (Pore targeting complex 97 kDa subunit) (PTAC97) (SCG)                                                                                                                                                       | Kpnb1 (Impnb)          | 48  | 17  | 13 | 17 |
| Q9Z277 | Bromodomain adjacent to zinc finger domain protein 1B (Williams-Beuren syndrome chromosomal region 9 protein homolog) (WBSR9)                                                                                                                                                          | Baz1b (Wbscr9)         | 43  | 17  | 26 | 34 |
| Q921C5 | Protein bicaudal D homolog 2 (Bic-D 2)                                                                                                                                                                                                                                                 | Bicd2 (Kiaa0699)       | 31  | 23  | 26 | 34 |
| Q61595 | Kinectin                                                                                                                                                                                                                                                                               | Ktn1                   | 15  | 50  | 43 | 56 |
| Q61846 | Maternal embryonic leucine zipper kinase (EC 2.7.11.1) (Protein kinase PK38) (mPK38)                                                                                                                                                                                                   | Melk (Kiaa0175) (Pk38) | 28  | 32  | 10 | 13 |

|        |                                                                                                                                                                   |                                  |      |      |     |     |
|--------|-------------------------------------------------------------------------------------------------------------------------------------------------------------------|----------------------------------|------|------|-----|-----|
| P63321 | Ras-related protein Ral-A                                                                                                                                         | Rala (Ral) (Rala)                | 25   | 22   | 30  | 39  |
| Q8CIM1 | Leucine-rich repeat-containing protein 45                                                                                                                         | Lrrc45                           | 33   | 71   | 27  | 35  |
| P47753 | F-actin-capping protein subunit alpha-1 (CapZ alpha-1)                                                                                                            | Capza1 (Cappa1)                  | 60   | 33   | 7   | 9   |
| P63163 | Small nuclear ribonucleoprotein-associated protein N (snRNP-N) (Sm protein N) (Sm-N) (SmN) (Sm-D) (Tissue-specific-splicing protein)                              | Snrpn (Smn)                      | 38   | 17   | 7   | 9   |
| Q7TQ07 | DNA polymerase nu (EC 2.7.7.7)                                                                                                                                    | Poln                             | 20   | 39   | 14  | 18  |
| Q61753 | D-3-phosphoglycerate dehydrogenase (3-PGDH) (EC 1.1.1.95) (A10)                                                                                                   | Phgdh                            | 105  | 158  | 14  | 18  |
| Q80X90 | Filamin-B (FLN-B) (Beta-filamin) (Actin-binding like protein) (ABP-280-like protein)                                                                              | Flnb                             | 63   | 279  | 32  | 41  |
| Q91YK0 | Leucine-rich repeat-containing protein 49 (Tubulin polyglutamylase complex subunit 4) (PGs4) (p79)                                                                | Lrrc49                           | 27   | 27   | 18  | 23  |
| Q07133 | Histone H1t (Testicular H1 histone)                                                                                                                               | Hist1h1t (H1ft) (H1t)            | 46   | 72   | 54  | 69  |
| Q61496 | Probable ATP-dependent RNA helicase DDX4 (EC 3.6.1.-) (DEAD box protein 4) (Vasa homolog) (Mvh)                                                                   | Ddx4 (Vasa)                      | 17   | 25   | 44  | 56  |
| O70456 | 14-3-3 protein sigma (Stratifin)                                                                                                                                  | Sfn (Mkrn3)                      | 573  | 666  | 56  | 71  |
| Q923B1 | Lariat debranching enzyme (EC 3.1.-.-)                                                                                                                            | Dbr1                             | 28   | 29   | 15  | 19  |
| P27661 | Histone H2A.x (H2a/x)                                                                                                                                             | H2afx (H2a.x) (H2ax) (Hist5-2ax) | 301  | 426  | 15  | 19  |
| Q62093 | Splicing factor, arginine/serine-rich 2 (Splicing factor SC35) (SC-35) (Splicing component, 35 kDa) (Protein PR264) (Putative myelin regulatory factor 1) (MRF-1) | Sfrs2 (Pr264) (Sfrs10)           | 184  | 117  | 15  | 19  |
| P20152 | Vimentin                                                                                                                                                          | Vim                              | 1749 | 2397 | 125 | 157 |

|        |                                                                                                                                                                          |                             |      |      |     |     |
|--------|--------------------------------------------------------------------------------------------------------------------------------------------------------------------------|-----------------------------|------|------|-----|-----|
| P28271 | Cytoplasmic aconitate hydratase (Aconitase) (EC 4.2.1.3) (Citrate hydro-lyase) (Iron-responsive element-binding protein 1) (IRE-BP 1) (Iron regulatory protein 1) (IRP1) | Aco1 (Ireb1) (Irebp)        | 77   | 122  | 147 | 184 |
| P61028 | Ras-related protein Rab-8B                                                                                                                                               | Rab8b                       | 17   | 59   | 4   | 5   |
| Q60716 | Prolyl 4-hydroxylase subunit alpha-2 (EC 1.14.11.2) (4-PH alpha-2) (Procollagen-proline,2-oxoglutarate-4-dioxygenase subunit alpha-2)                                    | P4ha2                       | 22   | 27   | 8   | 10  |
| P17183 | Gamma-enolase (EC 4.2.1.11) (2-phospho-D-glycerate hydro-lyase) (Neural enolase) (Neuron-specific enolase) (NSE) (Enolase 2)                                             | Eno2 (Eno-2)                | 228  | 181  | 12  | 15  |
| Q63ZW7 | InaD-like protein (Inadl protein) (Pals1-associated tight junction protein) (Protein associated to tight junctions) (Channel-interacting PDZ domain-containing protein)  | Inadl (Cipp) (Patj)         | 18   | 30   | 12  | 15  |
| Q3UKC1 | Tax1-binding protein 1 homolog                                                                                                                                           | Tax1bp1                     | 22   | 27   | 24  | 30  |
| P63101 | 14-3-3 protein zeta/delta (Protein kinase C inhibitor protein 1) (KCIP-1) (SEZ-2)                                                                                        | Ywhaz                       | 1383 | 1947 | 96  | 120 |
| P31001 | Desmin                                                                                                                                                                   | Des                         | 169  | 224  | 25  | 31  |
| Q811J3 | Iron-responsive element-binding protein 2 (IRE-BP 2) (Iron regulatory protein 2) (IRP2)                                                                                  | Ireb2 (Irp2)                | 69   | 119  | 142 | 176 |
| Q80Z38 | SH3 and multiple ankyrin repeat domains protein 2 (Shank2) (Cortactin-binding protein 1) (CortBP1)                                                                       | Shank2 (Cortbp1) (Kiaa1022) | 41   | 57   | 21  | 26  |
| Q61316 | Heat shock 70 kDa protein 4 (Heat shock 70-related protein APG-2)                                                                                                        | Hspa4 (Apg2) (Hsp110)       | 379  | 792  | 42  | 52  |
| Q8BU30 | Isoleucyl-tRNA synthetase, cytoplasmic (EC 6.1.1.5) (Isoleucine--tRNA ligase) (IleRS) (IRS)                                                                              | Iars                        | 85   | 46   | 30  | 37  |
| Q8R2X8 | Golgin-45 (Basic leucine zipper nuclear factor 1)                                                                                                                        | Blzf1                       | 28   | 22   | 13  | 16  |
| Q8BGD9 | Eukaryotic translation initiation factor 4B (eIF-4B)                                                                                                                     | Eif4b                       | 238  | 306  | 13  | 16  |

|        |                                                                                                                                                                                                       |                        |     |     |     |     |
|--------|-------------------------------------------------------------------------------------------------------------------------------------------------------------------------------------------------------|------------------------|-----|-----|-----|-----|
| P51880 | Fatty acid-binding protein, brain (B-FABP) (Fatty acid-binding protein 7) (Brain lipid-binding protein) (BLBP)                                                                                        | Fabp7 (Blbp)           | 933 | 856 | 31  | 38  |
| P59270 | Galactosylgalactosylxylosylprotein 3-beta-glucuronosyltransferase 2 (EC 2.4.1.135) (Beta-1,3-glucuronyltransferase 2) (UDP-glucuronosyltransferase-S) (Glucuronosyltransferase-S) (GlcAT-S) (GlcAT-D) | B3gat2 (Glcats)        | 29  | 16  | 9   | 11  |
| Q8VII8 | Mineralocorticoid receptor (MR) (Nuclear receptor subfamily 3 group C member 2)                                                                                                                       | Nr3c2 (Mlr)            | 28  | 22  | 18  | 22  |
| Q9CZY3 | Ubiquitin-conjugating enzyme E2 variant 1 (UEV-1) (CROC-1)                                                                                                                                            | Ube2v1 (Croc1)         | 83  | 163 | 166 | 201 |
| O08648 | Mitogen-activated protein kinase kinase kinase 4 (EC 2.7.11.25) (MAPK/ERK kinase kinase 4) (MEK kinase 4) (MEKK 4)                                                                                    | Map3k4 (Mekk4)         | 37  | 16  | 19  | 23  |
| P49025 | Citron Rho-interacting kinase (CRIK) (EC 2.7.11.1) (Rho-interacting, serine/threonine-protein kinase 21)                                                                                              | Cit                    | 49  | 67  | 67  | 81  |
| P47754 | F-actin-capping protein subunit alpha-2 (CapZ alpha-2)                                                                                                                                                | Capza2 (Cappa2)        | 60  | 33  | 5   | 6   |
| O35618 | Protein Mdm4 (p53-binding protein Mdm4) (Mdm2-like p53-binding protein) (Protein Mdmx) (Double minute 4 protein)                                                                                      | Mdm4 (Mdmx)            | 17  | 29  | 5   | 6   |
| Q6PDM2 | Splicing factor, arginine/serine-rich 1 (ASF/SF2)                                                                                                                                                     | Sfrs1                  | 24  | 91  | 5   | 6   |
| Q8VHS2 | Crumbs homolog 1                                                                                                                                                                                      | Crb1                   | 23  | 28  | 10  | 12  |
| Q60848 | Lymphocyte-specific helicase (EC 3.6.1.-) (Proliferation associated SNF2-like protein)                                                                                                                | Hells (Lsh) (Pasg)     | 37  | 35  | 10  | 12  |
| P05784 | Keratin, type I cytoskeletal 18 (Cytokeratin-18) (CK-18) (Keratin-18) (K18) (Cytokeratin endo B) (Keratin D)                                                                                          | Krt18 (Kerd) (Krt1-18) | 37  | 46  | 10  | 12  |

|        |                                                                                                                                                                                         |                            |     |     |     |     |
|--------|-----------------------------------------------------------------------------------------------------------------------------------------------------------------------------------------|----------------------------|-----|-----|-----|-----|
| P54227 | Stathmin (Phosphoprotein p19) (pp19) (Leukemia-associated phosphoprotein p18) (Oncoprotein 18) (Op18) (pp17) (Prosolin) (Metablastin) (Protein Pr22) (Leukemia-associated gene protein) | Stmn1 (Lag) (Lap18) (Pr22) | 121 | 120 | 10  | 12  |
| Q8BFY9 | Transportin-1 (Importin beta-2) (Karyopherin beta-2)                                                                                                                                    | Tnp01 (Kpnb2)              | 54  | 43  | 10  | 12  |
| P80315 | T-complex protein 1 subunit delta (TCP-1-delta) (CCT-delta) (A45)                                                                                                                       | Cct4 (Cctd)                | 61  | 59  | 15  | 18  |
| O08908 | Phosphatidylinositol 3-kinase regulatory subunit beta (PI3-kinase p85 subunit beta) (PtdIns-3-kinase p85-beta)                                                                          | Pik3r2                     | 19  | 25  | 20  | 24  |
| Q60575 | Kinesin-like protein KIF1B                                                                                                                                                              | Kif1b                      | 45  | 95  | 30  | 36  |
| Q9JKF1 | Ras GTPase-activating-like protein IQGAP1                                                                                                                                               | Iqgap1                     | 19  | 81  | 21  | 25  |
| O08810 | 116 kDa U5 small nuclear ribonucleoprotein component (U5 snRNP-specific protein, 116 kDa) (U5-116 kDa) (Elongation factor Tu GTP-binding domain-containing protein 2)                   | Eftud2 (Snrp116)           | 80  | 68  | 21  | 25  |
| Q61771 | Kinesin-like protein KIF3B (Microtubule plus end-directed kinesin motor 3B)                                                                                                             | Kif3b                      | 30  | 51  | 16  | 19  |
| Q9R0K7 | Plasma membrane calcium-transporting ATPase 2 (PMCA2) (EC 3.6.3.8) (Plasma membrane calcium ATPase isoform 2) (Plasma membrane calcium pump isoform 2)                                  | Atp2b2 (Pmca2)             | 32  | 27  | 70  | 83  |
| P54103 | DnaJ homolog subfamily C member 2 (Zuotin-related factor 1) (Mouse Id associate 1) (MIDA1)                                                                                              | Dnajc2 (Mida1) (Zrf1)      | 23  | 27  | 11  | 13  |
| P80313 | T-complex protein 1 subunit eta (TCP-1-eta) (CCT-eta)                                                                                                                                   | Cct7 (Ccth)                | 49  | 50  | 11  | 13  |
| Q8C3X4 | GTP-binding protein GUF1 homolog                                                                                                                                                        | Guf1                       | 311 | 506 | 412 | 483 |
| Q61171 | Peroxiredoxin-2 (EC 1.11.1.15) (Thioredoxin peroxidase 1) (Thioredoxin-dependent peroxide reductase 1) (Thiol-specific antioxidant protein) (TSA)                                       | Prdx2 (Tdp1) (Tpx)         | 568 | 898 | 47  | 55  |

|        |                                                                                                                                                                                                                                                                                                                    |                                  |     |     |     |     |
|--------|--------------------------------------------------------------------------------------------------------------------------------------------------------------------------------------------------------------------------------------------------------------------------------------------------------------------|----------------------------------|-----|-----|-----|-----|
| Q80XA6 | RalBP1-associated Eps domain-containing protein 2 (RalBP1-interacting protein 2) (Partner of RalBP1)                                                                                                                                                                                                               | Reps2 (Pob1)                     | 33  | 31  | 6   | 7   |
| P55821 | Stathmin-2 (Superior cervical ganglion-10 protein) (Protein SCG10)                                                                                                                                                                                                                                                 | Stmn2 (Scg10) (Scgn10) (Stmb2)   | 74  | 73  | 6   | 7   |
| Q9WUM4 | Coronin-1C (Coronin-3)                                                                                                                                                                                                                                                                                             | Coro1c                           | 42  | 28  | 18  | 21  |
| Q6GSS7 | Histone H2A type 2-A (H2A.2) (H2a-614) (H2a-615)                                                                                                                                                                                                                                                                   | Hist2h2aa1; Hist2h2aa2           | 505 | 763 | 18  | 21  |
| P49718 | DNA replication licensing factor MCM5 (CDC46 homolog) (P1-CDC46)                                                                                                                                                                                                                                                   | Mcm5 (Cdc46) (Mcmd5)             | 40  | 20  | 18  | 21  |
| Q5SPW0 | Vacuolar protein sorting-associated protein 54 (Tumor antigen SLP-8p homolog)                                                                                                                                                                                                                                      | Vps54                            | 36  | 28  | 13  | 15  |
| P48754 | Breast cancer type 1 susceptibility protein homolog                                                                                                                                                                                                                                                                | Brca1                            | 28  | 25  | 26  | 30  |
| Q9JKP5 | Muscleblind-like protein 1 (Triplet-expansion RNA-binding protein)                                                                                                                                                                                                                                                 | Mbnl1 (Exp) (Mbnl)               | 45  | 63  | 244 | 281 |
| Q62418 | Drebrin-like protein (SH3 domain-containing protein 7) (Actin-binding protein 1)                                                                                                                                                                                                                                   | Dbnl (Abp1) (Sh3p7)              | 24  | 39  | 7   | 8   |
| Q9Z2K1 | Keratin, type I cytoskeletal 16 (Cytokeratin-16) (CK-16) (Keratin-16) (K16)                                                                                                                                                                                                                                        | Krt16 (Krt1-16)                  | 37  | 37  | 7   | 8   |
| Q9QWY8 | 130 kDa phosphatidylinositol 4,5-biphosphate-dependent ARF1 GTPase-activating protein (PIP2-dependent ARF1 GAP) (ADP-ribosylation factor-directed GTPase-activating protein 1) (ARF GTPase-activating protein 1) (Development and differentiation-enhancing factor 1) (Differentiation-enhancing factor 1) (DEF-1) | Ddef1 (Asap1) (Kiaa1249) (Shag1) | 26  | 23  | 14  | 16  |
| P58660 | Caspase recruitment domain-containing protein 10 (Bcl10-interacting MAGUK protein 1) (Bimp1)                                                                                                                                                                                                                       | Card10 (Bimp1)                   | 33  | 23  | 15  | 17  |

|        |                                                                                                                                                                                                                     |                                   |     |     |    |    |
|--------|---------------------------------------------------------------------------------------------------------------------------------------------------------------------------------------------------------------------|-----------------------------------|-----|-----|----|----|
| P97820 | Mitogen-activated protein kinase kinase kinase 4 (EC 2.7.11.1) (MAPK/ERK kinase kinase kinase 4) (MEK kinase kinase 4) (MEKKK 4) (HPK/GCK-like kinase HGK) (Nck-interacting kinase)                                 | Map4k4 (Nik)                      | 65  | 54  | 15 | 17 |
| P62270 | 40S ribosomal protein S18 (Ke-3) (Ke3)                                                                                                                                                                              | Rps18                             | 210 | 209 | 15 | 17 |
| P55200 | Histone-lysine N-methyltransferase HRX (EC 2.1.1.43) (Zinc finger protein HRX) (ALL-1)                                                                                                                              | Mll (All1) (Hrx) (Mll1)           | 67  | 26  | 39 | 44 |
| P62908 | 40S ribosomal protein S3                                                                                                                                                                                            | Rps3                              | 778 | 762 | 39 | 44 |
| Q9CQV8 | 14-3-3 protein beta/alpha (Protein kinase C inhibitor protein 1) (KCIP-1)                                                                                                                                           | Ywhab                             | 983 | 971 | 71 | 80 |
| P40124 | Adenylyl cyclase-associated protein 1 (CAP 1)                                                                                                                                                                       | Cap1 (Cap)                        | 22  | 43  | 8  | 9  |
| Q91X97 | Neurocalcin-delta                                                                                                                                                                                                   | Ncald (D15Ert412e)                | 85  | 82  | 8  | 9  |
| Q921M3 | Splicing factor 3B subunit 3 (Spliceosome-associated protein 130) (SAP 130) (Pre-mRNA splicing factor SF3b 130 kDa subunit) (SF3b130)                                                                               | Sf3b3 (Kiaa0017)                  | 16  | 34  | 24 | 27 |
| Q9WUU9 | 80 kDa MCM3-associated protein (Protein GANP)                                                                                                                                                                       | Mcm3ap (Ganp) (Map80)             | 48  | 32  | 17 | 19 |
| Q9WUF3 | CASP8-associated protein 2 (FLICE-associated huge protein)                                                                                                                                                          | Casp8ap2 (Flash)                  | 28  | 16  | 26 | 29 |
| Q64467 | Glyceraldehyde-3-phosphate dehydrogenase, testis-specific (EC 1.2.1.12) (Spermatogenic glyceraldehyde-3-phosphate dehydrogenase) (Spermatogenic cell-specific glyceraldehyde 3-phosphate dehydrogenase 2) (GAPDH-2) | Gapdhs (Gapds)                    | 75  | 781 | 26 | 29 |
| P41230 | Histone demethylase JARID1C (EC 1.14.11.-) (Jumonji/ARID domain-containing protein 1C) (Protein SmcX) (Protein Xe169)                                                                                               | Jarid1c (Kiaa0234) (Smcx) (Xe169) | 34  | 32  | 26 | 29 |



|        |                                                                                                                                                                                                    |                         |      |      |     |     |
|--------|----------------------------------------------------------------------------------------------------------------------------------------------------------------------------------------------------|-------------------------|------|------|-----|-----|
| P26618 | Alpha-type platelet-derived growth factor receptor (EC 2.7.10.1) (PDGF-R-alpha) (CD140 antigen-like family member A) (CD antigen CD140a)                                                           | Pdgfra                  | 37   | 73   | 160 | 178 |
| Q61599 | Rho GDP-dissociation inhibitor 2 (Rho GDI 2) (Rho-GDI beta) (D4)                                                                                                                                   | Arhgdib (Gdid4)         | 18   | 25   | 9   | 10  |
| Q60864 | Stress-induced-phosphoprotein 1 (STI1) (mSTI1) (Hsc70/Hsp90-organizing protein) (Hop)                                                                                                              | Stip1                   | 257  | 245  | 19  | 21  |
| P62631 | Elongation factor 1-alpha 2 (EF-1-alpha-2) (Elongation factor 1 A-2) (eEF1A-2) (Statin S1)                                                                                                         | Eef1a2 (Eef1al) (Stn)   | 1275 | 1549 | 258 | 285 |
| Q91ZT5 | FYVE, RhoGEF and PH domain-containing protein 4 (Actin filament-binding protein frabin) (FGD1-related F-actin-binding protein)                                                                     | Fgd4                    | 29   | 19   | 10  | 11  |
| O55234 | Proteasome subunit beta type-5 (EC 3.4.25.1) (Proteasome epsilon chain) (Macropain epsilon chain) (Multicatalytic endopeptidase complex epsilon chain) (Proteasome subunit X) (Proteasome chain 6) | Psmb5                   | 168  | 227  | 10  | 11  |
| Q93092 | Transaldolase (EC 2.2.1.2)                                                                                                                                                                         | Taldo1 (Tal) (Taldo)    | 20   | 93   | 10  | 11  |
| Q9R0Q7 | Prostaglandin E synthase 3 (EC 5.3.99.3) (Cytosolic prostaglandin E2 synthase) (cPGES) (Telomerase-binding protein p23) (Hsp90 co-chaperone) (Progesterone receptor complex p23) (Sid 3177)        | Ptges3 (Sid3177) (Tebp) | 124  | 239  | 10  | 11  |
| Q9D8N0 | Elongation factor 1-gamma (EF-1-gamma) (eEF-1B gamma)                                                                                                                                              | Eef1g                   | 31   | 85   | 11  | 12  |
| P19001 | Keratin, type I cytoskeletal 19 (Cytokeratin-19) (CK-19) (Keratin-19) (K19)                                                                                                                        | Krt19 (Krt1-19)         | 37   | 46   | 11  | 12  |
| P49717 | DNA replication licensing factor MCM4 (CDC21 homolog) (P1-CDC21)                                                                                                                                   | Mcm4 (Cdc21) (Mcmd4)    | 29   | 18   | 11  | 12  |

|        |                                                                                                                                                                                        |                                    |      |      |     |     |
|--------|----------------------------------------------------------------------------------------------------------------------------------------------------------------------------------------|------------------------------------|------|------|-----|-----|
| Q3THS6 | S-adenosylmethionine synthetase isoform type 2 (AdoMet synthetase 2) (EC 2.5.1.6) (Methionine adenosyltransferase 2)                                                                   | Mat2a                              | 26   | 42   | 11  | 12  |
| Q9QUI0 | Transforming protein RhoA                                                                                                                                                              | Rhoa (Arha) (Arha2)                | 117  | 231  | 11  | 12  |
| Q99KK9 | Probable histidyl-tRNA synthetase, mitochondrial (EC 6.1.1.21) (Histidine--tRNA ligase) (HisRS) (Histidine--tRNA ligase-like)                                                          | Hars2 (Harsl)                      | 20   | 41   | 22  | 24  |
| P27546 | Microtubule-associated protein 4 (MAP-4)                                                                                                                                               | Map4 (Mtap4)                       | 94   | 41   | 33  | 36  |
| P07901 | Heat shock protein HSP 90-alpha (HSP 86) (Tumor-specific transplantation 86 kDa antigen) (TSTA)                                                                                        | Hsp90aa1 (Hsp86) (Hsp86-1) (Hspca) | 1529 | 2324 | 134 | 146 |
| Q6P9Z1 | SWI/SNF-related matrix-associated actin-dependent regulator of chromatin subfamily D member 3 (60 kDa BRG-1/Brm-associated factor subunit C) (BRG1-associated factor 60C) (mBAF60c)    | Smarcd3 (Baf60c)                   | 29   | 19   | 46  | 50  |
| P70298 | Homeobox protein cut-like 2 (Cut-like 2) (Homeobox protein Cux-2)                                                                                                                      | Cux2 (Cutl2)                       | 30   | 22   | 12  | 13  |
| P38647 | Stress-70 protein, mitochondrial (75 kDa glucose-regulated protein) (GRP 75) (Heat shock 70 kDa protein 9) (Peptide-binding protein 74) (PBP74) (P66 MOT) (Mortalin)                   | Hspa9 (Grp75) (Hsp74) (Hspa9a)     | 33   | 33   | 12  | 13  |
| Q8BKC5 | Importin-5 (Imp5) (Importin subunit beta-3) (Karyopherin beta-3) (Ran-binding protein 5) (RanBP5)                                                                                      | Ipo5 (Kpnb3) (Ranbp5)              | 185  | 91   | 12  | 13  |
| P10126 | Elongation factor 1-alpha 1 (EF-1-alpha-1) (Elongation factor 1 A-1) (eEF1A-1) (Elongation factor Tu) (EF-Tu)                                                                          | Eef1a1 (Eef1a)                     | 2004 | 2344 | 305 | 330 |
| P08113 | Endoplasmic reticulum chaperone protein 90 kDa beta member 1 (94 kDa glucose-regulated protein) (GRP94) (ERP99) (Polymorphic tumor rejection antigen 1) (Tumor rejection antigen gp96) | Hsp90b1 (Tra-1) (Tra1)             | 221  | 298  | 25  | 27  |

|        |                                                                                                                                                                                                                                                                                                                                        |                                    |      |      |    |    |
|--------|----------------------------------------------------------------------------------------------------------------------------------------------------------------------------------------------------------------------------------------------------------------------------------------------------------------------------------------|------------------------------------|------|------|----|----|
| Q9Z104 | SWI/SNF-related matrix-associated actin-dependent regulator of chromatin subfamily E member 1-related (SMARCE1-related protein) (HMG box-containing protein 20B) (Structural DNA-binding protein BRAF35) (BRCA2-associated factor 35)                                                                                                  | Hmg20b (Braf35) (Hmgx2) (Smarce1r) | 30   | 20   | 14 | 15 |
| P11984 | T-complex protein 1 subunit alpha A (TCP-1-alpha) (CCT-alpha) (Tailless complex polypeptide 1A) (TCP-1-A)                                                                                                                                                                                                                              | Cct1 (Ccta) (Tcp1)                 | 29   | 66   | 14 | 15 |
| Q3TY86 | Apoptosis-inducing factor 3 (EC 1.-.-.) (Apoptosis-inducing factor-like protein)                                                                                                                                                                                                                                                       | Aifm3 (Aifl)                       | 42   | 26   | 28 | 30 |
| P70398 | Probable ubiquitin carboxyl-terminal hydrolase FAF-X (EC 3.1.2.15) (Ubiquitin thioesterase FAF-X) (Ubiquitin-specific-processing protease FAF-X) (Deubiquitinating enzyme FAF-X) (Fat facets protein-related, X-linked) (Ubiquitin-specific protease 9, X chromosome) (Ubiquitin carboxyl-terminal hydrolase FAM) (Fat facets homolog) | Usp9x (Faf1) (Fam)                 | 42   | 28   | 57 | 61 |
| Q8BKX6 | Serine/threonine-protein kinase SMG1 (SMG-1) (EC 2.7.11.1)                                                                                                                                                                                                                                                                             | Smg1 (Kiaa0421)                    | 33   | 27   | 30 | 32 |
| P16858 | Glyceraldehyde-3-phosphate dehydrogenase (GAPDH) (EC 1.2.1.12)                                                                                                                                                                                                                                                                         | Gapdh (Gapd)                       | 1514 | 1781 | 84 | 89 |
| Q8VI56 | Low-density lipoprotein receptor-related protein 4 (LDLR dan)                                                                                                                                                                                                                                                                          | Lrp4 (Kiaa0816)                    | 77   | 30   | 19 | 20 |
| Q76MZ3 | Serine/threonine-protein phosphatase 2A 65 kDa regulatory subunit A alpha isoform (PP2A, subunit A, PR65-alpha isoform) (PP2A, subunit A, R1-alpha isoform)                                                                                                                                                                            | Ppp2r1a                            | 142  | 242  | 22 | 23 |
| P16546 | Spectrin alpha chain, brain (Spectrin, non-erythroid alpha chain) (Alpha-II spectrin) (Fodrin alpha chain)                                                                                                                                                                                                                             | Sptan1 (Spna2) (Spta2)             | 68   | 86   | 66 | 69 |
| Q61820 | GTP-binding nuclear protein Ran, testis-specific isoform                                                                                                                                                                                                                                                                               | Rasl2-9                            | 564  | 570  | 23 | 24 |

|        |                                                                                                                                                                                                       |                                                   |     |     |     |     |
|--------|-------------------------------------------------------------------------------------------------------------------------------------------------------------------------------------------------------|---------------------------------------------------|-----|-----|-----|-----|
| Q920R0 | Alsin (Amyotrophic lateral sclerosis protein 2 homolog)                                                                                                                                               | Als2                                              | 74  | 88  | 72  | 75  |
| Q62504 | Msx2-interacting protein (SPEN homolog) (SMART/HDAC1-associated repressor protein)                                                                                                                    | Spen (Kiaa0929) (Mint) (Sharp)                    | 27  | 18  | 72  | 75  |
| O35973 | Period circadian protein homolog 1 (Circadian clock protein PERIOD 1) (Circadian pacemaker protein Rigi) (mPER1)                                                                                      | Per1 (Per) (Rigi)                                 | 29  | 21  | 27  | 28  |
| P62281 | 40S ribosomal protein S11                                                                                                                                                                             | Rps11                                             | 166 | 132 | 27  | 28  |
| P26039 | Talin-1                                                                                                                                                                                               | Tln1 (Tln)                                        | 123 | 161 | 41  | 42  |
| Q9JM05 | E3 SUMO-protein ligase PIAS4 (Protein inhibitor of activated STAT protein 4) (Protein inhibitor of activated STAT protein gamma) (PIAS-gamma) (PIASy)                                                 | Pias4 (Piasg)                                     | 26  | 29  | 162 | 165 |
| P09586 | Prolactin-3B1 (Chorionic somatomammotropin hormone 2) (Placental lactogen II) (PL-II)                                                                                                                 | Pr13b1 (Csh2) (PI-2) (PI2)                        | 29  | 21  | 2   | 2   |
| O54750 | Cytochrome P450 2J6 (EC 1.14.14.1) (CYP11J6) (Arachidonic acid epoxygenase)                                                                                                                           | Cyp2j6                                            | 29  | 34  | 4   | 4   |
| P62141 | Serine/threonine-protein phosphatase PP1-beta catalytic subunit (PP-1B) (EC 3.1.3.16)                                                                                                                 | Ppp1cb                                            | 177 | 57  | 4   | 4   |
| Q60865 | Caprin-1 (Cytoplasmic activation- and proliferation-associated protein 1) (GPI-anchored membrane protein 1) (GPI-anchored protein p137) (p137GPI) (Membrane component chromosome 11 surface marker 1) | Caprin1 (Gpiap) (Gpiap1) (Gpip137) (M11s1) (G5E5) | 20  | 26  | 5   | 5   |
| P12367 | cAMP-dependent protein kinase type II-alpha regulatory subunit                                                                                                                                        | Prkar2a                                           | 33  | 23  | 5   | 5   |
| Q3TXZ1 | Zinc finger protein 575                                                                                                                                                                               | Znf575 (Zfp575)                                   | 30  | 25  | 5   | 5   |
| Q8VCZ3 | THAP domain-containing protein 7                                                                                                                                                                      | Thap7                                             | 26  | 18  | 6   | 6   |

|        |                                                                                                                                                                                                        |                                       |    |     |    |    |
|--------|--------------------------------------------------------------------------------------------------------------------------------------------------------------------------------------------------------|---------------------------------------|----|-----|----|----|
| P30416 | FK506-binding protein 4 (EC 5.2.1.8) (Peptidyl-prolyl cis-trans isomerase) (PPIase) (Rotamase) (HSP-binding immunophilin) (HBI) (FKBP52 protein) (52 kDa FK506-binding protein) (FKBP59) (p59 protein) | Fkbp4                                 | 40 | 62  | 8  | 8  |
| Q8C0N1 | Kinesin-like protein KIF2B                                                                                                                                                                             | Kif2b                                 | 17 | 26  | 8  | 8  |
| Q7TNP2 | Serine/threonine-protein phosphatase 2A 65 kDa regulatory subunit A beta isoform (PP2A, subunit A, PR65-beta isoform) (PP2A, subunit A, R1-beta isoform)                                               | Ppp2r1b                               | 26 | 22  | 9  | 9  |
| Q9R190 | Metastasis-associated protein MTA2 (Metastasis-associated 1-like 1)                                                                                                                                    | Mta2 (Mta111)                         | 27 | 26  | 9  | 9  |
| Q99LX0 | Protein DJ-1 (Parkinson disease protein 7 homolog)                                                                                                                                                     | Park7                                 | 53 | 178 | 9  | 9  |
| Q6P5F9 | Exportin-1 (Exp1) (Chromosome region maintenance 1 protein homolog)                                                                                                                                    | Xpo1 (Crm1)                           | 19 | 43  | 9  | 9  |
| Q9DAI4 | Zinc finger and BTB domain-containing protein 43 (Zinc finger protein 297B)                                                                                                                            | Zbtb43 (Kiaa0414) (Zfp297b) (Znf297b) | 23 | 51  | 9  | 9  |
| Q61781 | Keratin, type I cytoskeletal 14 (Cytokeratin-14) (CK-14) (Keratin-14) (K14)                                                                                                                            | Krt14 (Krt1-14)                       | 38 | 37  | 10 | 10 |
| Q9WV80 | Sorting nexin-1                                                                                                                                                                                        | Snx1                                  | 23 | 49  | 11 | 11 |
| Q61092 | Laminin subunit gamma-2 (Laminin 5 gamma 2 subunit) (Kalinin/nicein/epiligrin 100 kDa subunit) (Laminin B2t chain)                                                                                     | Lamc2                                 | 33 | 29  | 13 | 13 |
| Q80YV4 | Pantothenate kinase 4 (EC 2.7.1.33) (Pantothenic acid kinase 4) (mPanK4)                                                                                                                               | Pank4                                 | 23 | 28  | 13 | 13 |
| Q9DB77 | Cytochrome b-c1 complex subunit 2, mitochondrial (Ubiquinol-cytochrome-c reductase complex core protein 2) (Core protein II) (Complex III subunit 2)                                                   | Uqcrc2                                | 29 | 20  | 13 | 13 |
| Q9JIF7 | Coatomer subunit beta (Beta-coat protein) (Beta-COP)                                                                                                                                                   | Copb1 (Copb)                          | 37 | 22  | 15 | 15 |

|        |                                                                                                                                           |                                                |      |      |     |     |
|--------|-------------------------------------------------------------------------------------------------------------------------------------------|------------------------------------------------|------|------|-----|-----|
| P25206 | DNA replication licensing factor MCM3 (DNA polymerase alpha holoenzyme-associated protein P1) (P1-MCM3)                                   | Mcm3 (Mcmd)<br>(Mcmd3)                         | 74   | 185  | 15  | 15  |
| Q01098 | Glutamate [NMDA] receptor subunit epsilon-3 (N-methyl D-aspartate receptor subtype 2C) (NMDAR2C) (NR2C)                                   | Grin2c                                         | 18   | 33   | 15  | 15  |
| O08788 | Dynactin subunit 1 (150 kDa dynein-associated polypeptide) (DAP-150) (DP-150) (p150-glued)                                                | Dctn1                                          | 64   | 70   | 19  | 19  |
| Q8R4K2 | Interleukin-1 receptor-associated kinase 4 (IRAK-4) (EC 2.7.11.1)                                                                         | Irak4                                          | 32   | 47   | 22  | 22  |
| Q8BSS9 | Liprin-alpha-2 (Protein tyrosine phosphatase receptor type f polypeptide-interacting protein alpha-2) (PTPRF-interacting protein alpha-2) | Ppfia2                                         | 36   | 21   | 22  | 22  |
| P30681 | High mobility group protein B2 (High mobility group protein 2) (HMG-2)                                                                    | Hmgb2<br>(Hmg2)                                | 94   | 222  | 24  | 24  |
| Q80UK8 | Integrator complex subunit 2 (Int2)                                                                                                       | Ints2<br>(Kiaa1287)                            | 16   | 27   | 24  | 24  |
| Q6P8J7 | Creatine kinase, sarcomeric mitochondrial (EC 2.7.3.2) (S-MtCK)                                                                           | Ckmt2                                          | 50   | 66   | 26  | 26  |
| Q62261 | Spectrin beta chain, brain 1 (Spectrin, non-erythroid beta chain 1) (Beta-II spectrin) (Fodrin beta chain) (Embryonic liver fodrin)       | Sptbn1 (Elf)<br>(Spnb-2)<br>(Spnb2)<br>(Sptb2) | 56   | 54   | 48  | 48  |
| Q8K4E0 | Alstrom syndrome protein 1 homolog                                                                                                        | Alms1<br>(Kiaa0328)                            | 29   | 30   | 86  | 86  |
| Q9QYX7 | Protein piccolo (Aczonin) (Multidomain presynaptic cytomatrix protein) (Brain-derived HLMN protein)                                       | Pclo (Acz)                                     | 101  | 117  | 114 | 114 |
| P68254 | 14-3-3 protein theta (14-3-3 protein tau)                                                                                                 | Ywhaq                                          | 1104 | 994  | 92  | 91  |
| P11499 | Heat shock protein HSP 90-beta (HSP 84) (Tumor-specific transplantation 84 kDa antigen) (TSTA)                                            | Hsp90ab1<br>(Hsp84)<br>(Hsp84-1)<br>(Hspcb)    | 2943 | 3523 | 208 | 205 |
| P58252 | Elongation factor 2 (EF-2)                                                                                                                | Eef2                                           | 1630 | 1718 | 128 | 126 |

|        |                                                                                                                                                                                                              |                                        |     |     |    |    |
|--------|--------------------------------------------------------------------------------------------------------------------------------------------------------------------------------------------------------------|----------------------------------------|-----|-----|----|----|
| Q91YE5 | Bromodomain adjacent to zinc finger domain protein 2A (Transcription termination factor I-interacting protein 5) (TTF-I-interacting protein 5) (Tip5)                                                        | Baz2a (Tip5)                           | 36  | 15  | 56 | 55 |
| P45591 | Cofilin-2 (Cofilin, muscle isoform)                                                                                                                                                                          | Cfl2                                   | 528 | 431 | 39 | 38 |
| P23116 | Eukaryotic translation initiation factor 3 subunit A (eIF3a) (Eukaryotic translation initiation factor 3 subunit 10) (eIF-3-theta) (eIF3 p167) (eIF3 p180) (eIF3 p185) (p162) (Centrosomin)                  | Eif3a (Csma) (Eif3) (Eif3s10)          | 199 | 166 | 58 | 56 |
| O08638 | Myosin-11 (Myosin heavy chain 11) (Myosin heavy chain, smooth muscle isoform) (SMMHC)                                                                                                                        | Myh11                                  | 211 | 221 | 79 | 76 |
| Q9QXL1 | Kinesin-like protein KIF21B (Kinesin-like protein KIF6)                                                                                                                                                      | Kif21b (Kif6)                          | 22  | 45  | 26 | 25 |
| Q8R4B8 | NACHT, LRR and PYD domains-containing protein 3 (Cold autoinflammatory syndrome 1 protein homolog) (Cryopyrin) (PYRIN-containing APAF1-like protein 1) (Mast cell maturation-associated-inducible protein 1) | Nlrp3 (Cias1) (Mmig1) (Nalp3) (Pypaf1) | 30  | 20  | 24 | 23 |
| P16406 | Glutamyl aminopeptidase (EC 3.4.11.7) (EAP) (Aminopeptidase A) (APA) (BP-1/6C3 antigen) (CD antigen CD249)                                                                                                   | Enpep                                  | 98  | 90  | 48 | 46 |
| Q8BGQ7 | Alanyl-tRNA synthetase, cytoplasmic (EC 6.1.1.7) (Alanine--tRNA ligase) (AlaRS)                                                                                                                              | Aars                                   | 179 | 216 | 23 | 22 |
| Q91V92 | ATP-citrate synthase (EC 2.3.3.8) (ATP-citrate (pro-S)-lyase) (Citrate cleavage enzyme)                                                                                                                      | Acly                                   | 349 | 488 | 45 | 43 |
| P07724 | Serum albumin                                                                                                                                                                                                | Alb (Alb-1) (Alb1)                     | 550 | 572 | 22 | 21 |
| Q8R1B4 | Eukaryotic translation initiation factor 3 subunit C (eIF3c) (Eukaryotic translation initiation factor 3 subunit 8) (eIF3 p110)                                                                              | Eif3c (Eif3s8)                         | 34  | 63  | 22 | 21 |
| Q61768 | Kinesin-1 heavy chain (Ubiquitous kinesin heavy chain) (UKHC) (Conventional kinesin heavy chain)                                                                                                             | Kif5b (Khcs) (Kns1)                    | 102 | 303 | 43 | 41 |

|        |                                                                                                                                                                                             |                                   |      |      |     |     |
|--------|---------------------------------------------------------------------------------------------------------------------------------------------------------------------------------------------|-----------------------------------|------|------|-----|-----|
| Q6ZPK0 | PHD finger protein 21A (BRAF35-HDAC complex protein BHC80) (mBHC80) (BHC80a)                                                                                                                | Phf21a (Bhc80) (Kiaa1696) (Pfff1) | 28   | 37   | 20  | 19  |
| P62827 | GTP-binding nuclear protein Ran (GTPase Ran) (Ras-related nuclear protein) (Ras-like protein TC4)                                                                                           | Ran (Rasl2-8)                     | 756  | 656  | 38  | 36  |
| P03966 | N-myc proto-oncogene protein                                                                                                                                                                | Mycn (Nmyc) (Nmyc1)               | 65   | 46   | 18  | 17  |
| P30275 | Creatine kinase, ubiquitous mitochondrial (EC 2.7.3.2) (U-MtCK) (Acidic-type mitochondrial creatine kinase) (Mia-CK)                                                                        | Ckmt1                             | 205  | 121  | 32  | 30  |
| Q04447 | Creatine kinase B-type (EC 2.7.3.2) (Creatine kinase B chain) (B-CK)                                                                                                                        | Ckb (Ckbb)                        | 9079 | 7277 | 434 | 406 |
| Q99PF4 | Cadherin-23 (Otocadherin)                                                                                                                                                                   | Cdh23                             | 29   | 32   | 29  | 27  |
| Q8CGC6 | RNA-binding protein 28 (RNA-binding motif protein 28)                                                                                                                                       | Rbm28                             | 24   | 41   | 71  | 66  |
| Q6TXD4 | Dynamin-binding protein (Scaffold protein Tuba)                                                                                                                                             | Dnmbp (Kiaa1010)                  | 32   | 21   | 13  | 12  |
| P08730 | Keratin, type I cytoskeletal 13 (Cytokeratin-13) (CK-13) (Keratin-13) (K13) (47 kDa cytokeratin)                                                                                            | Krt13 (Krt1-13)                   | 37   | 46   | 13  | 12  |
| Q8R5G7 | Centaurin-delta-3 (Cnt-d3) (Arf-GAP, Rho-GAP, ankyrin repeat and pleckstrin homology domain-containing protein 3) (Dual specificity Rho- and Arf-GTPase-activating protein 1)               | Centd3 (Arap3) (Drag1) (Kiaa4097) | 21   | 27   | 26  | 24  |
| Q7TMY8 | E3 ubiquitin-protein ligase HUWE1 (EC 6.3.2.-) (HECT, UBA and WWE domain-containing protein 1) (Upstream regulatory element-binding protein 1) (URE-binding protein 1) (URE-B1) (E3Histone) | Huwe1 (Kiaa0312) (Ureb1)          | 33   | 91   | 39  | 36  |
| O35206 | Collagen alpha-1(XV) chain [Cleaved into: Endostatin (Endostatin-XV)]                                                                                                                       | Col15a1                           | 31   | 37   | 12  | 11  |



|        |                                                                                                                                                                                                                     |                    |     |     |     |     |
|--------|---------------------------------------------------------------------------------------------------------------------------------------------------------------------------------------------------------------------|--------------------|-----|-----|-----|-----|
| P35969 | Vascular endothelial growth factor receptor 1 (VEGFR-1) (EC 2.7.10.1) (Tyrosine-protein kinase receptor FLT) (FLT-1) (Embryonic receptor kinase 2)                                                                  | Flt1 (Emrk2) (Flt) | 29  | 36  | 35  | 32  |
| Q01853 | Transitional endoplasmic reticulum ATPase (TER ATPase) (15S Mg(2+)-ATPase p97 subunit) (Valosin-containing protein) (VCP)                                                                                           | Vcp                | 691 | 699 | 56  | 51  |
| Q9WTR0 | Matrix metalloproteinase-16 (MMP-16) (EC 3.4.24.-) (Membrane-type matrix metalloproteinase 3) (MT-MMP 3) (MTMMP3) (Membrane-type-3 matrix metalloproteinase) (MT3-MMP) (MT3MMP)                                     | Mmp16              | 17  | 36  | 11  | 10  |
| P03995 | Glial fibrillary acidic protein (GFAP)                                                                                                                                                                              | Gfap               | 63  | 90  | 22  | 20  |
| Q8CGC7 | Bifunctional aminoacyl-tRNA synthetase [Includes: Glutamyl-tRNA synthetase (EC 6.1.1.17) (Glutamate--tRNA ligase); Prolyl-tRNA synthetase (EC 6.1.1.15) (Proline--tRNA ligase)]                                     | Eprs (Qprs)        | 130 | 102 | 32  | 29  |
| Q8VDD5 | Myosin-9 (Myosin heavy chain 9) (Myosin heavy chain, non-muscle IIa) (Non-muscle myosin heavy chain IIa) (NMMHC II-a) (NMMHC-IIA) (Cellular myosin heavy chain, type A) (Non-muscle myosin heavy chain-A) (NMMHC-A) | Myh9               | 780 | 839 | 127 | 115 |
| P07310 | Creatine kinase M-type (EC 2.7.3.2) (Creatine kinase M chain) (M-CK)                                                                                                                                                | Ckm (Ckmm)         | 73  | 107 | 31  | 28  |
| Q9QZH3 | Peptidyl-prolyl cis-trans isomerase E (PPIase E) (Rotamase E) (EC 5.2.1.8) (Cyclophilin E) (Cyclophilin-33)                                                                                                         | Ppie (Cyp33)       | 28  | 35  | 10  | 9   |
| P43406 | Integrin alpha-V (Vitronectin receptor subunit alpha) (CD antigen CD51) [Cleaved into: Integrin alpha-V heavy chain; Integrin alpha-V light chain]                                                                  | Itgav              | 23  | 35  | 19  | 17  |

|        |                                                                                                                                                                                                                                |                                    |     |      |    |    |
|--------|--------------------------------------------------------------------------------------------------------------------------------------------------------------------------------------------------------------------------------|------------------------------------|-----|------|----|----|
| P02535 | Keratin, type I cytoskeletal 10 (Cytokeratin-10) (CK-10) (Keratin-10) (K10) (56 kDa cyto keratin) (Keratin, type I cytoskeletal 59 kDa)                                                                                        | Krt10 (Krt1-10)                    | 252 | 152  | 19 | 17 |
| Q925Q8 | Dachshund homolog 2 (Dach2)                                                                                                                                                                                                    | Dach2                              | 22  | 30   | 9  | 8  |
| Q9JIL4 | PDZ domain-containing protein 1 (CFTR-associated protein of 70 kDa) (Na/Pi cotransporter C-terminal-associated protein) (NaPi-Cap1) (Sodium-hydrogen exchanger regulatory factor 3) (Na(+)/H(+) exchanger regulatory factor 3) | Pdzk1 (Cap70) (Nherf3)             | 29  | 39   | 9  | 8  |
| P43277 | Histone H1.3 (H1 VAR.4) (H1d)                                                                                                                                                                                                  | Hist1h1d (H1f3)                    | 78  | 99   | 18 | 16 |
| Q9QXA7 | Tripartite motif-containing protein 44 (Protein DIPB) (Protein Mc7)                                                                                                                                                            | Trim44 (Dipb)                      | 28  | 23   | 18 | 16 |
| P26041 | Moesin (Membrane-organizing extension spike protein)                                                                                                                                                                           | Msn                                | 136 | 127  | 44 | 39 |
| Q68FD5 | Clathrin heavy chain 1                                                                                                                                                                                                         | Cltc                               | 944 | 884  | 88 | 78 |
| Q99104 | Myosin-Va (Dilute myosin heavy chain, non-muscle)                                                                                                                                                                              | Myo5a (Dilute)                     | 28  | 34   | 35 | 31 |
| P33173 | Kinesin-like protein KIF1A (Axonal transporter of synaptic vesicles)                                                                                                                                                           | Kif1a (Atsv) (Kif1)                | 45  | 108  | 25 | 22 |
| Q8BG95 | Protein phosphatase 1 regulatory subunit 12B (Myosin phosphatase-targeting subunit 2)                                                                                                                                          | Ppp1r12b (Mypt2)                   | 25  | 24   | 25 | 22 |
| Q61147 | Ceruloplasmin (EC 1.16.3.1) (Ferroxidase)                                                                                                                                                                                      | Cp                                 | 24  | 27   | 41 | 36 |
| Q9R0P5 | Destrin (Actin-depolymerizing factor) (ADF) (Sid 23)                                                                                                                                                                           | Dstn (Dsn) (Sid23)                 | 61  | 81   | 8  | 7  |
| Q02053 | Ubiquitin-like modifier-activating enzyme 1 (Ubiquitin-activating enzyme E1) (Ubiquitin-like modifier-activating enzyme 1 X) (Ubiquitin-activating enzyme E1 X)                                                                | Uba1 (Sbx) (Ube1) (Ube1ax) (Ube1x) | 660 | 1086 | 63 | 55 |

|        |                                                                                                                                                                                      |                           |     |     |    |    |
|--------|--------------------------------------------------------------------------------------------------------------------------------------------------------------------------------------|---------------------------|-----|-----|----|----|
| Q8CJ27 | Abnormal spindle-like microcephaly-associated protein homolog (Spindle and hydroxyurea checkpoint abnormal protein) (Calmodulin-binding protein Sha1) (Calmodulin binding protein 1) | Aspm (Calmbp1) (Sha1)     | 35  | 23  | 55 | 48 |
| Q8VHE6 | Dynein heavy chain 5, axonemal (Axonemal beta dynein heavy chain 5) (Mdnah5) (Ciliary dynein heavy chain 5)                                                                          | Dnah5 (Dnahc5)            | 47  | 44  | 83 | 72 |
| Q924C1 | Exportin-5 (Exp5) (Ran-binding protein 21)                                                                                                                                           | Xpo5 (Kiaa1291) (Ranbp21) | 20  | 62  | 15 | 13 |
| P21550 | Beta-enolase (EC 4.2.1.11) (2-phospho-D-glycerate hydro-lyase) (Muscle-specific enolase) (MSE) (Skeletal muscle enolase) (Enolase 3)                                                 | Eno3 (Eno-3)              | 313 | 146 | 30 | 26 |
| Q11011 | Puromycin-sensitive aminopeptidase (PSA) (EC 3.4.11.-)                                                                                                                               | Npepps (Psa)              | 71  | 141 | 30 | 26 |
| Q9Z1Q9 | Valyl-tRNA synthetase (EC 6.1.1.9) (Valine--tRNA ligase) (ValRS) (Protein G7a)                                                                                                       | Vars (Bat6) (G7a) (Vars2) | 380 | 302 | 37 | 32 |
| Q9JJK8 | Serine/threonine-protein kinase ATR (EC 2.7.11.1) (Ataxia telangiectasia and Rad3-related protein)                                                                                   | Atr                       | 20  | 25  | 72 | 62 |
| Q63994 | Myeloid cell surface antigen CD33 (Sialic acid-binding Ig-like lectin 3) (Siglec-3) (CD antigen CD33)                                                                                | Cd33 (Siglec3)            | 34  | 34  | 7  | 6  |
| O54749 | Cytochrome P450 2J5 (EC 1.14.14.1) (CYPIIJ5) (Arachidonic acid epoxygenase)                                                                                                          | Cyp2j5                    | 29  | 34  | 7  | 6  |
| Q921E2 | Ras-related protein Rab-31                                                                                                                                                           | Rab31                     | 18  | 29  | 7  | 6  |
| P67984 | 60S ribosomal protein L22 (Heparin-binding protein HBp15)                                                                                                                            | Rpl22                     | 59  | 48  | 7  | 6  |
| O88866 | Hormonally up-regulated neu tumor-associated kinase (EC 2.7.11.1) (Serine/threonine-protein kinase MAK-V)                                                                            | Hunk (Makv)               | 27  | 21  | 14 | 12 |
| P35979 | 60S ribosomal protein L12                                                                                                                                                            | Rpl12                     | 208 | 389 | 14 | 12 |
| P97784 | Cryptochrome-1                                                                                                                                                                       | Cry1                      | 52  | 42  | 21 | 18 |

|        |                                                                                                                                                                                                                                                                  |                                 |     |     |    |    |
|--------|------------------------------------------------------------------------------------------------------------------------------------------------------------------------------------------------------------------------------------------------------------------|---------------------------------|-----|-----|----|----|
| Q9R194 | Cryptochrome-2                                                                                                                                                                                                                                                   | Cry2<br>(Kiaa0658)              | 52  | 42  | 21 | 18 |
| P11881 | Inositol 1,4,5-trisphosphate receptor type 1<br>(Type 1 inositol 1,4,5-trisphosphate receptor)<br>(Type 1 InsP3 receptor) (IP3 receptor isoform 1)<br>(InsP3R1) (Inositol 1,4,5-trisphosphate-binding protein P400) (Purkinje cell protein 1)<br>(Protein PCD-6) | Itpr1 (Insp3r)<br>(Pcd6) (Pcp1) | 37  | 42  | 48 | 41 |
| Q6ZWN5 | 40S ribosomal protein S9                                                                                                                                                                                                                                         | Rps9                            | 459 | 248 | 47 | 40 |
| Q9JM52 | Misshapen-like kinase 1 (EC 2.7.11.1)<br>(Mitogen-activated protein kinase kinase kinase kinase 6) (MAPK/ERK kinase kinase 6) (MEK kinase kinase 6) (MEKKK 6)<br>(Misshapen/NIK-related kinase) (GCK family kinase MiNK)                                         | Mink1<br>(Map4k6)<br>(Mink)     | 18  | 54  | 13 | 11 |
| Q9CQN1 | Heat shock protein 75 kDa, mitochondrial<br>(HSP 75) (Tumor necrosis factor type 1 receptor-associated protein) (TRAP-1) (TNFR-associated protein 1)                                                                                                             | Trap1 (Hsp75)                   | 197 | 335 | 13 | 11 |
| P20029 | 78 kDa glucose-regulated protein (GRP 78)<br>(Heat shock 70 kDa protein 5)<br>(Immunoglobulin heavy chain-binding protein)<br>(BiP)                                                                                                                              | Hspa5 (Grp78)                   | 262 | 312 | 25 | 21 |
| Q80TB8 | Probable oxidoreductase KIAA1576 (EC 1.-.-.-)                                                                                                                                                                                                                    | Kiaa1576                        | 25  | 14  | 25 | 21 |
| Q99PT1 | Rho GDP-dissociation inhibitor 1 (Rho GDI 1)<br>(Rho-GDI alpha) (GDI-1)                                                                                                                                                                                          | Arhgdia<br>(C87222)<br>(Gdi1)   | 923 | 675 | 37 | 31 |
| Q9ES17 | Interleukin-21 (IL-21)                                                                                                                                                                                                                                           | Il21                            | 22  | 25  | 6  | 5  |
| P46664 | Adenylosuccinate synthetase isozyme 2<br>(AMPSase 2) (AdSS 2) (EC 6.3.4.4)<br>(Adenylosuccinate synthetase, non-muscle isozyme) (Adenylosuccinate synthetase, acidic isozyme) (IMP--aspartate ligase 2)                                                          | Adss (Adss2)                    | 36  | 66  | 12 | 10 |

|        |                                                                                                                                                                                        |                             |     |     |    |    |
|--------|----------------------------------------------------------------------------------------------------------------------------------------------------------------------------------------|-----------------------------|-----|-----|----|----|
| Q8R4U0 | Stabilin-2 (Fasciclin, EGF-like, laminin-type EGF-like and link domain-containing scavenger receptor 2) (FEEL-2) [Cleaved into: Short form stabilin-2]                                 | Stab2 (Feel2)               | 25  | 43  | 12 | 10 |
| Q99PP7 | E3 ubiquitin-protein ligase TRIM33 (EC 6.3.2.-) (Tripartite motif-containing protein 33) (Transcription intermediary factor 1-gamma) (TIF1-gamma) (Ectodermin homolog)                 | Trim33 (Kiaa1113)           | 33  | 25  | 12 | 10 |
| Q05816 | Fatty acid-binding protein, epidermal (E-FABP) (Fatty acid-binding protein 5) (Psoriasis-associated fatty acid-binding protein homolog) (PA-FABP) (Keratinocyte lipid-binding protein) | Fabp5 (Fabpe) (Klbp) (Mal1) | 331 | 206 | 18 | 15 |
| P11983 | T-complex protein 1 subunit alpha B (TCP-1-alpha) (CCT-alpha) (Tailless complex polypeptide 1B) (TCP-1-B)                                                                              | Cct1 (Ccta) (Tcpl)          | 29  | 66  | 18 | 15 |
| P20357 | Microtubule-associated protein 2 (MAP-2)                                                                                                                                               | Map2 (Mtap2)                | 50  | 22  | 30 | 25 |
| P11531 | Dystrophin                                                                                                                                                                             | Dmd                         | 25  | 16  | 66 | 55 |
| P09405 | Nucleolin (Protein C23)                                                                                                                                                                | Ncl (Nuc)                   | 775 | 872 | 78 | 65 |
| Q91XQ0 | Dynein heavy chain 8, axonemal (Axonemal beta dynein heavy chain 8) (Ciliary dynein heavy chain 8)                                                                                     | Dnahc8                      | 47  | 51  | 77 | 64 |
| Q6URW6 | Myosin-14 (Myosin heavy chain 14) (Myosin heavy chain, non-muscle IIc) (Non-muscle myosin heavy chain IIc) (NMHC II-C)                                                                 | Myh14                       | 60  | 48  | 53 | 44 |

|        |                                                                                                                                                                                                                                                                                                                                                                                                                                                                         |                               |      |      |     |     |
|--------|-------------------------------------------------------------------------------------------------------------------------------------------------------------------------------------------------------------------------------------------------------------------------------------------------------------------------------------------------------------------------------------------------------------------------------------------------------------------------|-------------------------------|------|------|-----|-----|
| P19096 | Fatty acid synthase (EC 2.3.1.85) [Includes: [Acyl-carrier-protein] S-acetyltransferase (EC 2.3.1.38); [Acyl-carrier-protein] S-malonyltransferase (EC 2.3.1.39); 3-oxoacyl-[acyl-carrier-protein] synthase (EC 2.3.1.41); 3-oxoacyl-[acyl-carrier-protein] reductase (EC 1.1.1.100); 3-hydroxypalmitoyl-[acyl-carrier-protein] dehydratase (EC 4.2.1.61); Enoyl-[acyl-carrier-protein] reductase (EC 1.3.1.10); Oleoyl [acyl-carrier-protein] hydrolase (EC 3.1.2.14)] | Fasn                          | 1869 | 1524 | 163 | 135 |
| Q8R429 | Sarcoplasmic/endoplasmic reticulum calcium ATPase 1 (SERCA1) (EC 3.6.3.8) (Calcium pump 1) (Calcium-transporting ATPase sarcoplasmic reticulum type, fast twitch skeletal muscle isoform) (SR Ca(2+)-ATPase 1) (Endoplasmic reticulum class 1/2 Ca(2+) ATPase)                                                                                                                                                                                                          | Atp2a1                        | 25   | 17   | 17  | 14  |
| P80316 | T-complex protein 1 subunit epsilon (TCP-1-epsilon) (CCT-epsilon)                                                                                                                                                                                                                                                                                                                                                                                                       | Cct5 (Ccte) (Kiaa0098)        | 239  | 102  | 17  | 14  |
| O55103 | Periaxin                                                                                                                                                                                                                                                                                                                                                                                                                                                                | Prx                           | 19   | 30   | 28  | 23  |
| P62259 | 14-3-3 protein epsilon (14-3-3E)                                                                                                                                                                                                                                                                                                                                                                                                                                        | Ywhae                         | 1202 | 998  | 116 | 95  |
| Q6DFV7 | Nuclear receptor coactivator 7                                                                                                                                                                                                                                                                                                                                                                                                                                          | Ncoa7                         | 25   | 16   | 11  | 9   |
| Q6ZQ38 | Cullin-associated NEDD8-dissociated protein 1 (Cullin-associated and neddylation-dissociated protein 1) (p120 CAND1)                                                                                                                                                                                                                                                                                                                                                    | Cand1 (D10Ert516e) (Kiaa0829) | 221  | 246  | 33  | 27  |
| P42227 | Signal transducer and activator of transcription 3 (Acute-phase response factor)                                                                                                                                                                                                                                                                                                                                                                                        | Stat3 (Aprf)                  | 16   | 28   | 33  | 27  |
| Q569Z5 | Probable ATP-dependent RNA helicase DDX46 (EC 3.6.1.-) (DEAD box protein 46)                                                                                                                                                                                                                                                                                                                                                                                            | Ddx46 (Kiaa0801)              | 25   | 17   | 21  | 17  |
| Q80ZW0 | Serine/threonine-protein kinase 35 (EC 2.7.11.1)                                                                                                                                                                                                                                                                                                                                                                                                                        | Stk35                         | 14   | 50   | 21  | 17  |

|        |                                                                                                                                                                                        |                         |     |     |     |     |
|--------|----------------------------------------------------------------------------------------------------------------------------------------------------------------------------------------|-------------------------|-----|-----|-----|-----|
| Q64512 | Tyrosine-protein phosphatase non-receptor type 13 (EC 3.1.3.48) (Protein tyrosine phosphatase PTP-BL) (Protein-tyrosine phosphatase RIP) (Protein tyrosine phosphatase DPZPTP) (PTP36) | Ptpn13 (Ptp14)          | 28  | 27  | 26  | 21  |
| Q921J2 | GTP-binding protein Rheb (Ras homolog enriched in brain)                                                                                                                               | Rheb                    | 21  | 44  | 31  | 25  |
| Q62407 | Striated muscle-specific serine/threonine protein kinase (EC 2.7.11.1) (Aortic preferentially expressed protein 1) (APEG-1)                                                            | Speg (Apeg1) (Kiaa1297) | 26  | 20  | 31  | 25  |
| P17182 | Alpha-enolase (EC 4.2.1.11) (2-phospho-D-glycerate hydro-lyase) (Non-neural enolase) (NNE) (Enolase 1)                                                                                 | Eno1 (Eno-1)            | 976 | 802 | 62  | 50  |
| Q924C6 | Lysyl oxidase homolog 4 (EC 1.4.3.-) (Lysyl oxidase-like protein 4) (Lysyl oxidase-related protein C)                                                                                  | Loxl4 (Loxc)            | 15  | 28  | 5   | 4   |
| Q5XJY5 | Coatomer subunit delta (Delta-coat protein) (Delta-COP) (Archain)                                                                                                                      | Arcn1 (Copd)            | 61  | 45  | 10  | 8   |
| P54923 | [Protein ADP-ribosylarginine] hydrolase (ADP-ribosylarginine hydrolase) (EC 3.2.2.19) (ADP-ribose-L-arginine cleaving enzyme)                                                          | Adprh (Arh1)            | 20  | 41  | 15  | 12  |
| Q8VI47 | Canalicular multispecific organic anion transporter 1 (ATP-binding cassette sub-family C member 2)                                                                                     | Abcc2                   | 31  | 38  | 39  | 31  |
| Q99MD9 | Nuclear autoantigenic sperm protein (NASP)                                                                                                                                             | Nasp                    | 365 | 293 | 34  | 27  |
| Q91ZU6 | Bullous pemphigoid antigen 1, isoforms 1/2/3/4 (BPA) (Hemidesmosomal plaque protein) (Dystonia musculorum protein) (Dystonin)                                                          | Dst (Bpag1)             | 78  | 38  | 126 | 100 |
| Q80T14 | Extracellular matrix protein FRAS1                                                                                                                                                     | Fras1 (Kiaa1500)        | 48  | 109 | 24  | 19  |

|        |                                                                                                                                                 |                                        |      |     |     |     |
|--------|-------------------------------------------------------------------------------------------------------------------------------------------------|----------------------------------------|------|-----|-----|-----|
| Q8C196 | Carbamoyl-phosphate synthase [ammonia], mitochondrial (EC 6.3.4.16) (Carbamoyl-phosphate synthetase I) (CPSase I)                               | Cps1                                   | 22   | 25  | 19  | 15  |
| Q80Z16 | E3 ubiquitin-protein ligase LRSAM1 (EC 6.3.2.-) (Leucine-rich repeat and sterile alpha motif-containing protein 1) (Tsg101-associated ligase)   | Lrsam1                                 | 19   | 35  | 19  | 15  |
| Q80UN9 | tRNA isopentenyltransferase, mitochondrial (IPTase) (EC 2.5.1.8) (Isopentenyl-diphosphate:tRNA isopentenyltransferase) (IPP transferase) (IPPT) | Trit1 (Ipt)                            | 31   | 24  | 19  | 15  |
| P62754 | 40S ribosomal protein S6 (Phosphoprotein NP33)                                                                                                  | Rps6                                   | 127  | 283 | 19  | 15  |
| Q8CIQ7 | Dedicator of cytokinesis protein 3 (Modifier of cell adhesion) (Presenilin-binding protein) (PBP)                                               | Dock3 (Moca)                           | 80   | 56  | 33  | 26  |
| Q9QWL7 | Keratin, type I cytoskeletal 17 (Cytokeratin-17) (CK-17) (Keratin-17) (K17)                                                                     | Krt17 (Krt1-17)                        | 38   | 46  | 14  | 11  |
| Q9JHU4 | Cytoplasmic dynein 1 heavy chain 1 (Cytoplasmic dynein heavy chain 1) (Dynein heavy chain, cytosolic)                                           | Dync1h1 (Dhc1) (Dnch1) (Dnchc1) (Dyhc) | 822  | 395 | 157 | 123 |
| Q6A078 | Centrosomal protein of 290 kDa (Cep290) (Nephrocystin-6)                                                                                        | Cep290 (Kiaa0373) (Nphp6)              | 32   | 57  | 85  | 66  |
| P31254 | Ubiquitin-like modifier-activating enzyme 1 Y (Ubiquitin-activating enzyme E1 Y) (Ubiquitin-activating enzyme E1)                               | Ube1ay (Sby) (Ube1y) (Ube1y1)          | 161  | 77  | 22  | 17  |
| P06151 | L-lactate dehydrogenase A chain (LDH-A) (EC 1.1.1.27) (LDH muscle subunit) (LDH-M)                                                              | Ldha (Ldh-1) (Ldh1)                    | 1033 | 421 | 74  | 57  |
| Q9CZW4 | Long-chain-fatty-acid--CoA ligase 3 (EC 6.2.1.3) (Long-chain acyl-CoA synthetase 3) (LACS 3)                                                    | Acs13 (Acs3) (Fac13)                   | 41   | 37  | 13  | 10  |



|        |                                                                                                                                                                                                                                        |                                 |     |     |    |    |
|--------|----------------------------------------------------------------------------------------------------------------------------------------------------------------------------------------------------------------------------------------|---------------------------------|-----|-----|----|----|
| P05063 | Fructose-bisphosphate aldolase C (EC 4.1.2.13) (Brain-type aldolase) (Aldolase 3) (Zebrin II) (Scrapie-responsive protein 2)                                                                                                           | Aldoc (Aldo3) (Scrg2)           | 35  | 51  | 13 | 10 |
| P62748 | Hippocalcin-like protein 1 (Visinin-like protein 3) (VILIP-3) (Neural visinin-like protein 3) (NVL-3) (NVP-3)                                                                                                                          | Hpcal1                          | 59  | 97  | 13 | 10 |
| Q7TMK6 | Protein Hook homolog 2                                                                                                                                                                                                                 | Hook2                           | 33  | 36  | 26 | 20 |
| Q8CGK3 | Lon protease homolog, mitochondrial (EC 3.4.21.-) (Lon protease-like protein) (LONP) (Mitochondrial ATP-dependent protease Lon) (Serine protease 15)                                                                                   | Lonp1 (Prss15)                  | 21  | 30  | 43 | 33 |
| P62702 | 40S ribosomal protein S4, X isoform                                                                                                                                                                                                    | Rps4x (Rps4)                    | 402 | 304 | 30 | 23 |
| Q8JZQ2 | AFG3-like protein 2 (EC 3.4.24.-)                                                                                                                                                                                                      | Afg3l2                          | 15  | 27  | 17 | 13 |
| P47856 | Glucosamine--fructose-6-phosphate aminotransferase [isomerizing] 1 (EC 2.6.1.16) (Glutamine:fructose 6 phosphate amidotransferase 1) (GFAT 1) (GFAT1) (D-fructose-6-phosphate amidotransferase 1) (Hexosephosphate aminotransferase 1) | Gfpt1 (Gfpt)                    | 17  | 29  | 17 | 13 |
| Q569Z6 | Thyroid hormone receptor-associated protein 3 (Thyroid hormone receptor-associated protein complex 150 kDa component) (Trap150)                                                                                                        | Thrap3 (Trap150)                | 29  | 48  | 21 | 16 |
| P39447 | Tight junction protein ZO-1 (Zonula occludens protein 1) (Zona occludens protein 1) (Tight junction protein 1)                                                                                                                         | Tjp1 (Zo1)                      | 36  | 15  | 21 | 16 |
| Q99MY8 | Probable histone-lysine N-methyltransferase ASH1L (EC 2.1.1.43) (Absent small and homeotic disks protein 1 homolog) (ASH1-like protein)                                                                                                | Ash1l                           | 19  | 31  | 46 | 35 |
| P97434 | Myosin phosphatase Rho-interacting protein (Rho-interacting protein 3) (RIP3) (p116Rip)                                                                                                                                                | Mrip (Kiaa0864) (Mrip) (Rhoip3) | 35  | 23  | 25 | 19 |

|        |                                                                                                                                                                                                                            |                                       |     |     |    |    |
|--------|----------------------------------------------------------------------------------------------------------------------------------------------------------------------------------------------------------------------------|---------------------------------------|-----|-----|----|----|
| P70670 | Nascent polypeptide-associated complex subunit alpha, muscle-specific form (Alpha-NAC, muscle-specific form)                                                                                                               | Naca (Gm1878)                         | 22  | 130 | 29 | 22 |
| P16627 | Heat shock 70 kDa protein 1L (Heat shock 70 kDa protein 1-like) (Heat shock 70 kDa-like protein 1) (Spermatid-specific heat shock protein 70)                                                                              | Hspa1l (Hsc70t)                       | 319 | 238 | 33 | 25 |
| O70228 | Probable phospholipid-transporting ATPase IIA (EC 3.6.3.1) (ATPase class II type 9A)                                                                                                                                       | Atp9a                                 | 31  | 29  | 37 | 28 |
| Q9QYB1 | Chloride intracellular channel protein 4 (mc3s5/mtCLIC)                                                                                                                                                                    | Clic4                                 | 28  | 33  | 4  | 3  |
| P56480 | ATP synthase subunit beta, mitochondrial (EC 3.6.3.14)                                                                                                                                                                     | Atp5b                                 | 31  | 50  | 8  | 6  |
| Q02956 | Protein kinase C zeta type (EC 2.7.11.13) (nPKC-zeta)                                                                                                                                                                      | Prkcz (PkcZ)                          | 29  | 15  | 8  | 6  |
| Q9DBP5 | UMP-CMP kinase (EC 2.7.4.14) (Cytidylate kinase) (Deoxycytidylate kinase) (Cytidine monophosphate kinase) (Uridine monophosphate kinase) (Uridine monophosphate/cytidine monophosphate kinase) (UMP/CMP kinase) (UMP/CMPK) | Cmpk1 (Cmk) (Cmpk) (Uck) (Umk) (Umpk) | 107 | 93  | 12 | 9  |
| P25233 | Necdin                                                                                                                                                                                                                     | Ndn                                   | 30  | 23  | 16 | 12 |
| Q3TXS7 | 26S proteasome non-ATPase regulatory subunit 1 (26S proteasome regulatory subunit RPN2) (26S proteasome regulatory subunit S1)                                                                                             | Psmc1                                 | 100 | 89  | 16 | 12 |
| P62751 | 60S ribosomal protein L23a                                                                                                                                                                                                 | Rpl23a                                | 75  | 49  | 16 | 12 |
| O54887 | Testis-specific serine kinase substrate (Testis-specific kinase substrate) (STK22 substrate 1)                                                                                                                             | Stk22s1 (Tsks)                        | 50  | 21  | 16 | 12 |
| Q8K1F9 | Lactase-like protein (Klotho/lactase-phlorizin hydrolase-related protein)                                                                                                                                                  | Lct1 (Klph)                           | 27  | 21  | 24 | 18 |
| Q8K045 | Serine/threonine-protein kinase N3 (EC 2.7.11.13) (Protein kinase PKN-beta) (Protein-kinase C-related kinase 3)                                                                                                            | Pkn3 (Pknbeta)                        | 130 | 126 | 36 | 27 |

|        |                                                                                                                                      |                                                   |      |      |     |     |
|--------|--------------------------------------------------------------------------------------------------------------------------------------|---------------------------------------------------|------|------|-----|-----|
| Q6P3Y5 | Zinc finger protein 280C (Suppressor of hairy wing homolog 3)                                                                        | Znf280c (Kiaa1584) (Suhw3) (Zfp280c)              | 87   | 142  | 43  | 32  |
| Q4VGL6 | Roquin (RING finger and C3H zinc finger protein 1) (Protein Sanroque)                                                                | Rc3h1 (Gm551) (Kiaa2025)                          | 54   | 54   | 23  | 17  |
| P58681 | Toll-like receptor 7                                                                                                                 | Tlr7                                              | 27   | 33   | 23  | 17  |
| P60710 | Actin, cytoplasmic 1 (Beta-actin)                                                                                                    | Actb                                              | 5140 | 4496 | 282 | 208 |
| Q8VBX6 | Multiple PDZ domain protein (Multi-PDZ domain protein 1)                                                                             | Mpdz (Mupp1)                                      | 17   | 29   | 38  | 28  |
| P62264 | 40S ribosomal protein S14                                                                                                            | Rps14                                             | 163  | 166  | 15  | 11  |
| P25444 | 40S ribosomal protein S2 (S4) (LLRep3 protein)                                                                                       | Rps2 (Llrep3) (Rps4)                              | 217  | 50   | 26  | 19  |
| Q61656 | Probable ATP-dependent RNA helicase DDX5 (EC 3.6.1.-) (DEAD box protein 5) (RNA helicase p68) (DEAD box RNA helicase DEAD1) (mDEAD1) | Ddx5 (Tnz2)                                       | 90   | 43   | 11  | 8   |
| Q91Z67 | SLIT-ROBO Rho GTPase-activating protein 2 (srGAP2) (Formin-binding protein 2) (Formin-binding protein 27) (FBP-27)                   | Srgap2 (Fbp27) (Fnbp2)                            | 77   | 48   | 11  | 8   |
| P62991 | Ubiquitin                                                                                                                            | Rps27a (Uba80) (Ubcep1); Uba52 (Ubcep2); Ubb; Ubc | 61   | 54   | 11  | 8   |
| Q61696 | Heat shock 70 kDa protein 1A (Heat shock 70 kDa protein 3) (HSP70.3) (Hsp68)                                                         | Hspa1a (Hsp70-3) (Hsp70A1)                        | 266  | 236  | 33  | 24  |
| Q61699 | Heat shock protein 105 kDa (Heat shock-related 100 kDa protein E7I) (HSP-E7I) (Heat shock 110 kDa protein) (42 degrees C-HSP)        | Hsph1 (Hsp105) (Hsp110) (Kiaa0201)                | 46   | 48   | 18  | 13  |

|        |                                                                                                                                                                                                                                 |                                          |     |     |    |    |
|--------|---------------------------------------------------------------------------------------------------------------------------------------------------------------------------------------------------------------------------------|------------------------------------------|-----|-----|----|----|
| Q64237 | Dopamine beta-hydroxylase (EC 1.14.17.1) (Dopamine beta-monoxygenase) [Cleaved into: Soluble dopamine beta-hydroxylase]                                                                                                         | Dbh                                      | 44  | 23  | 7  | 5  |
| Q99LG2 | Transportin-2 (Karyopherin beta-2b)                                                                                                                                                                                             | Tnpo2                                    | 42  | 32  | 7  | 5  |
| Q60673 | Receptor-type tyrosine-protein phosphatase-like N (R-PTP-N) (PTP IA-2)                                                                                                                                                          | Ptprn (Ptp35)                            | 30  | 18  | 14 | 10 |
| P14148 | 60S ribosomal protein L7                                                                                                                                                                                                        | Rpl7                                     | 145 | 52  | 14 | 10 |
| Q03172 | Zinc finger protein 40 (Transcription factor alphaA-CRYBP1) (Alpha A-crystallin-binding protein I) (Alpha A-CRYBP1)                                                                                                             | Hivep1 (Cryabp1) (Znf40)                 | 25  | 24  | 21 | 15 |
| P08551 | Neurofilament light polypeptide (NF-L) (Neurofilament triplet L protein) (68 kDa neurofilament protein)                                                                                                                         | Nefl (Nf68) (Nfl)                        | 51  | 36  | 17 | 12 |
| P51410 | 60S ribosomal protein L9                                                                                                                                                                                                        | Rpl9                                     | 187 | 212 | 17 | 12 |
| Q8BMJ2 | Leucyl-tRNA synthetase, cytoplasmic (EC 6.1.1.4) (Leucine--tRNA ligase) (LeuRS)                                                                                                                                                 | Lars                                     | 52  | 45  | 47 | 33 |
| P61294 | Ras-related protein Rab-6B                                                                                                                                                                                                      | Rab6b (D9Bwg0185e)                       | 18  | 53  | 10 | 7  |
| Q6ZQ12 | Ninein-like protein                                                                                                                                                                                                             | Nlp (Kiaa0980)                           | 15  | 34  | 23 | 16 |
| Q91YJ5 | Translation initiation factor IF-2, mitochondrial (IF-2Mt) (IF2(mt)) (IF-2(Mt))                                                                                                                                                 | Mtif2                                    | 29  | 23  | 13 | 9  |
| Q64707 | U2 small nuclear ribonucleoprotein auxiliary factor 35 kDa subunit-related protein 1 (U2(RNU2) small nuclear RNA auxiliary factor 1-like 1) (CCCH type zinc finger, RNA-binding motif and serine/arginine rich protein 1) (SP2) | Zrsr1 (Sp2) (Sp2-7) (U2af1rs1) (U2af111) | 34  | 22  | 13 | 9  |
| Q52KI8 | Serine/arginine repetitive matrix protein 1 (Plenty-of-prolines 101)                                                                                                                                                            | Srrm1 (Pop101)                           | 22  | 73  | 29 | 20 |
| Q8CD91 | SPARC-related modular calcium-binding protein 2 (Secreted modular calcium-binding protein 2) (SMOC-2)                                                                                                                           | Smoc2                                    | 29  | 16  | 16 | 11 |
| Q99PV0 | Pre-mRNA-processing-splicing factor 8 (Splicing factor Prp8)                                                                                                                                                                    | Prpf8 (Prp8)                             | 28  | 29  | 51 | 35 |

|        |                                                                                                                                                                               |                              |      |      |     |     |
|--------|-------------------------------------------------------------------------------------------------------------------------------------------------------------------------------|------------------------------|------|------|-----|-----|
| Q9CWF2 | Tubulin beta-2B chain                                                                                                                                                         | Tubb2b                       | 1435 | 825  | 86  | 59  |
| P68040 | Guanine nucleotide-binding protein subunit beta-2-like 1 (Receptor of activated protein kinase C 1) (RACK1) (Receptor for activated C kinase) (p205) (12-3)                   | Gnb2l1 (Gnb2-rs1)            | 541  | 153  | 35  | 24  |
| P99024 | Tubulin beta-5 chain                                                                                                                                                          | Tubb5                        | 1377 | 976  | 88  | 60  |
| O88799 | Zonadhesin                                                                                                                                                                    | Zan                          | 22   | 26   | 25  | 17  |
| Q80TP3 | E3 ubiquitin-protein ligase UBR5 (EC 6.3.2.-) (E3 ubiquitin-protein ligase, HECT domain-containing 1) (Hyperplastic discs protein homolog)                                    | Ubr5 (Edd) (Edd1) (Kiaa0896) | 27   | 17   | 43  | 29  |
| Q6PHN9 | Ras-related protein Rab-35                                                                                                                                                    | Rab35                        | 17   | 59   | 3   | 2   |
| Q8C9S8 | Cysteine protease ATG4A (EC 3.4.22.-) (Autophagy-related protein 4 homolog A) (Autophagin-2) (Autophagy-related cysteine endopeptidase 2) (AUT-like 2 cysteine endopeptidase) | Atg4a (Apg4a) (Autl2)        | 26   | 21   | 6   | 4   |
| P29391 | Ferritin light chain 1 (Ferritin L subunit 1)                                                                                                                                 | Ftl1 (Ftl) (Ftl-1)           | 150  | 159  | 6   | 4   |
| P43275 | Histone H1.1 (H1 VAR.3) (H1a)                                                                                                                                                 | Hist1h1a (H1f1)              | 28   | 90   | 9   | 6   |
| Q9WV07 | Epidermis-type lipoxygenase 3 (e-LOX-3) (EC 1.13.11.-)                                                                                                                        | Aloxe3                       | 25   | 22   | 9   | 6   |
| P61979 | Heterogeneous nuclear ribonucleoprotein K (hnRNP K)                                                                                                                           | Hnrnpk (Hnrpk)               | 225  | 46   | 18  | 12  |
| Q9Z0T6 | Polycystic kidney disease and receptor for egg jelly-related protein (PKD and REJ homolog)                                                                                    | Pkdrej                       | 32   | 32   | 18  | 12  |
| Q8K4L3 | Supervillin (Archvillin) (p205/p250)                                                                                                                                          | Svil                         | 25   | 22   | 18  | 12  |
| P61164 | Alpha-centractin (Centractin) (Centrosome-associated actin homolog) (Actin-RPV) (ARP1)                                                                                        | Actr1a (Ctrn1)               | 247  | 124  | 27  | 18  |
| P68033 | Actin, alpha cardiac muscle 1 (Alpha-cardiac actin)                                                                                                                           | Actc1 (Actc)                 | 3948 | 2726 | 234 | 155 |

|        |                                                                                                                                                                                                                                                                                                        |                              |      |     |     |    |
|--------|--------------------------------------------------------------------------------------------------------------------------------------------------------------------------------------------------------------------------------------------------------------------------------------------------------|------------------------------|------|-----|-----|----|
| O88444 | Adenylate cyclase type 1 (EC 4.6.1.1) (Adenylate cyclase type I) (ATP pyrophosphate-lyase 1) (Adenylyl cyclase 1) (Ca(2+)/calmodulin-activated adenylyl cyclase)                                                                                                                                       | Adcy1                        | 33   | 31  | 26  | 17 |
| P68372 | Tubulin beta-2C chain                                                                                                                                                                                                                                                                                  | Tubb2c                       | 1300 | 891 | 78  | 51 |
| P42932 | T-complex protein 1 subunit theta (TCP-1-theta) (CCT-theta)                                                                                                                                                                                                                                            | Cct8 (Cctq)                  | 197  | 57  | 23  | 15 |
| Q924W6 | Tripartite motif-containing protein 66 (Transcriptional intermediary factor 1 delta)                                                                                                                                                                                                                   | Trim66 (Tif1d)               | 28   | 18  | 23  | 15 |
| O70435 | Proteasome subunit alpha type-3 (EC 3.4.25.1) (Proteasome component C8) (Macropain subunit C8) (Multicatalytic endopeptidase complex subunit C8) (Proteasome subunit K)                                                                                                                                | Psma3                        | 95   | 76  | 14  | 9  |
| P61161 | Actin-related protein 2 (Actin-like protein 2)                                                                                                                                                                                                                                                         | Actr2 (Arp2)                 | 247  | 124 | 28  | 18 |
| P40142 | Transketolase (TK) (EC 2.2.1.1) (P68)                                                                                                                                                                                                                                                                  | Tkt                          | 562  | 250 | 117 | 75 |
| Q9CXW4 | 60S ribosomal protein L11                                                                                                                                                                                                                                                                              | Rpl11                        | 72   | 79  | 11  | 7  |
| Q8CG48 | Structural maintenance of chromosomes protein 2 (Chromosome-associated protein E) (XCAP-E homolog) (FGF-inducible protein 16)                                                                                                                                                                          | Smc2 (Cape) (Fin16) (Smc2l1) | 32   | 36  | 41  | 26 |
| Q7TMM9 | Tubulin beta-2A chain                                                                                                                                                                                                                                                                                  | Tubb2a (Tubb2)               | 1422 | 775 | 83  | 52 |
| Q61983 | Sodium-dependent phosphate transport protein 1 (Sodium/phosphate cotransporter 1) (Na(+)/Pi cotransporter 1) (Solute carrier family 17 member 1) (Renal sodium-dependent phosphate transport protein 1) (Renal sodium-phosphate transport protein 1) (Renal Na(+)-dependent phosphate cotransporter 1) | Slc17a1 (Npt1)               | 31   | 33  | 8   | 5  |
| Q9QZ09 | Putative homeodomain transcription factor 1                                                                                                                                                                                                                                                            | Phtf1 (Phtf)                 | 29   | 24  | 8   | 5  |
| Q8C7H1 | Methylmalonic aciduria type A homolog, mitochondrial                                                                                                                                                                                                                                                   | Mmaa                         | 31   | 37  | 16  | 10 |

|        |                                                                                                                                                                                                                       |                                    |     |     |    |    |
|--------|-----------------------------------------------------------------------------------------------------------------------------------------------------------------------------------------------------------------------|------------------------------------|-----|-----|----|----|
| Q80U87 | Ubiquitin carboxyl-terminal hydrolase 8 (EC 3.1.2.15) (Ubiquitin thioesterase 8) (Ubiquitin-specific-processing protease 8) (Deubiquitinating enzyme 8) (mUBPy)                                                       | Usp8 (Kiaa0055) (Ubpy)             | 29  | 23  | 24 | 15 |
| P17156 | Heat shock-related 70 kDa protein 2 (Heat shock protein 70.2)                                                                                                                                                         | Hspa2 (Hcp70.2) (Hsp70-2)          | 964 | 544 | 60 | 37 |
| Q68ED2 | Metabotropic glutamate receptor 7 (mGluR7)                                                                                                                                                                            | Grm7 (Gprc1g) (Mglur7)             | 37  | 33  | 13 | 8  |
| P84099 | 60S ribosomal protein L19                                                                                                                                                                                             | Rpl19                              | 39  | 47  | 13 | 8  |
| O35551 | Rab GTPase-binding effector protein 1 (Rabaptin-5) (Rabaptin-5alpha)                                                                                                                                                  | Rabep1 (Rab5ep) (Rabpt5) (Rabpt5a) | 33  | 26  | 26 | 16 |
| Q61879 | Myosin-10 (Myosin heavy chain 10) (Myosin heavy chain, non-muscle IIb) (Non-muscle myosin heavy chain IIb) (NMMHC II-b) (NMMHC-IIB) (Cellular myosin heavy chain, type B) (Non-muscle myosin heavy chain-B) (NMMHC-B) | Myh10                              | 122 | 101 | 65 | 40 |
| P62301 | 40S ribosomal protein S13                                                                                                                                                                                             | Rps13                              | 77  | 100 | 23 | 14 |
| O88291 | Zinc finger protein 326 (Zinc finger protein-associated with nuclear matrix of 75 kDa)                                                                                                                                | Znf326 (Zan75) (Zfp326)            | 41  | 55  | 5  | 3  |
| O35344 | Importin subunit alpha-3 (Karyopherin subunit alpha-3) (Importin alpha Q2) (Qip2)                                                                                                                                     | Kpna3 (Qip2)                       | 24  | 28  | 10 | 6  |
| Q9Z0P5 | Twinfilin-2 (Twinfilin-1-like protein) (A6-related protein) (mA6RP)                                                                                                                                                   | Twf2 (Ptk9I)                       | 29  | 32  | 10 | 6  |
| Q9QWK5 | Baculoviral IAP repeat-containing protein 1a (Neuronal apoptosis inhibitory protein 1)                                                                                                                                | Naip1 (Birc1a) (Naip)              | 21  | 28  | 20 | 12 |

|        |                                                                                                                                                                                                                               |                             |      |     |     |    |
|--------|-------------------------------------------------------------------------------------------------------------------------------------------------------------------------------------------------------------------------------|-----------------------------|------|-----|-----|----|
| Q9EQZ6 | Rap guanine nucleotide exchange factor 4 (cAMP-regulated guanine nucleotide exchange factor II) (cAMP-GEFII) (Exchange factor directly activated by cAMP 2) (Epac 2) (cAMP-dependent Rap1 guanine-nucleotide exchange factor) | Rapgef4 (Cgef2) (Epac2)     | 47   | 23  | 20  | 12 |
| Q8R4K8 | Pappalysin-1 (EC 3.4.24.79) (Pregnancy-associated plasma protein A) (PAPP-A) (Insulin-like growth factor-dependent IGF-binding protein 4 protease) (IGF-dependent IGFBP-4 protease) (IGFBP-4ase)                              | Pappa                       | 41   | 43  | 25  | 15 |
| Q6NZJ6 | Eukaryotic translation initiation factor 4 gamma 1 (eIF-4-gamma 1) (eIF-4G 1) (eIF-4G1)                                                                                                                                       | Eif4g1                      | 47   | 113 | 30  | 18 |
| P26040 | Ezrin (p81) (Cytovillin) (Villin-2)                                                                                                                                                                                           | Ezr (Vil2)                  | 127  | 106 | 27  | 16 |
| P63038 | 60 kDa heat shock protein, mitochondrial (Heat shock protein 60) (HSP-60) (Hsp60) (60 kDa chaperonin) (Chaperonin 60) (CPN60) (Mitochondrial matrix protein P1) (HSP-65)                                                      | Hspd1 (Hsp60)               | 15   | 32  | 22  | 13 |
| P80317 | T-complex protein 1 subunit zeta (TCP-1-zeta) (CCT-zeta) (CCT-zeta-1)                                                                                                                                                         | Cct6a (Cct6) (Cctz) (Cctz1) | 160  | 52  | 22  | 13 |
| P10630 | Eukaryotic initiation factor 4A-II (eIF-4A-II) (eIF4A-II) (EC 3.6.1.-) (ATP-dependent RNA helicase eIF4A-2)                                                                                                                   | Eif4a2 (Ddx2b)              | 194  | 78  | 17  | 10 |
| P09041 | Phosphoglycerate kinase 2 (EC 2.7.2.3) (Phosphoglycerate kinase, testis specific)                                                                                                                                             | Pgk2 (Pgk-2)                | 162  | 73  | 17  | 10 |
| P63017 | Heat shock cognate 71 kDa protein (Heat shock 70 kDa protein 8)                                                                                                                                                               | Hspa8 (Hsc70) (Hsc73)       | 1719 | 959 | 119 | 70 |
| P05532 | Mast/stem cell growth factor receptor (SCFR) (EC 2.7.10.1) (Proto-oncogene tyrosine-protein kinase Kit) (c-kit) (CD antigen CD117)                                                                                            | Kit (SI)                    | 16   | 35  | 12  | 7  |



|        |                                                                                                                                                                                                                                     |                             |     |     |    |    |
|--------|-------------------------------------------------------------------------------------------------------------------------------------------------------------------------------------------------------------------------------------|-----------------------------|-----|-----|----|----|
| Q9JI78 | Peptide-N(4)-(N-acetyl-beta-glucosaminy)asparagine amidase (PNGase) (mPNGase) (EC 3.5.1.52) (Peptide:N-glycanase) (N-glycanase 1)                                                                                                   | Ngly1                       | 29  | 32  | 19 | 11 |
| P41105 | 60S ribosomal protein L28                                                                                                                                                                                                           | Rpl28                       | 49  | 41  | 19 | 11 |
| Q9CZX8 | 40S ribosomal protein S19                                                                                                                                                                                                           | Rps19                       | 206 | 146 | 19 | 11 |
| P53762 | Aryl hydrocarbon receptor nuclear translocator (ARNT protein) (Dioxin receptor, nuclear translocator) (Hypoxia-inducible factor 1 beta) (HIF-1 beta)                                                                                | Arnt                        | 25  | 22  | 7  | 4  |
| P47757 | F-actin-capping protein subunit beta (CapZ beta)                                                                                                                                                                                    | Capzb (Cappb1)              | 107 | 68  | 7  | 4  |
| P97287 | Induced myeloid leukemia cell differentiation protein Mcl-1 homolog (Bcl-2-related protein EAT/mcl1)                                                                                                                                | Mcl1                        | 26  | 30  | 7  | 4  |
| Q9QUK4 | Baculoviral IAP repeat-containing protein 1b (Neuronal apoptosis inhibitory protein 2)                                                                                                                                              | Naip2 (Birc1b) (Naip-rs6)   | 21  | 28  | 14 | 8  |
| P26043 | Radixin (ESP10)                                                                                                                                                                                                                     | Rdx                         | 127 | 106 | 23 | 13 |
| Q9R1X4 | Protein timeless homolog (mTim)                                                                                                                                                                                                     | Timeless (Tim1) (Timeless1) | 22  | 25  | 16 | 9  |
| Q9Z1Q5 | Chloride intracellular channel protein 1 (Nuclear chloride ion channel 27) (NCC27)                                                                                                                                                  | Clic1                       | 137 | 139 | 9  | 5  |
| Q8K2I9 | F-box only protein 18 (EC 3.6.1.-) (F-box DNA helicase 1)                                                                                                                                                                           | Fbxo18 (Fbh1) (Fbx18)       | 30  | 23  | 9  | 5  |
| P63073 | Eukaryotic translation initiation factor 4E (eIF-4E) (eIF4E) (mRNA cap-binding protein) (eIF-4F 25 kDa subunit)                                                                                                                     | Eif4e                       | 110 | 25  | 9  | 5  |
| Q8BYH8 | Chromodomain-helicase-DNA-binding protein 9 (CHD-9) (EC 3.6.1.-) (ATP-dependent helicase CHD9) (Peroxisomal proliferator-activated receptor A-interacting complex 320 kDa protein) (PPAR-alpha-interacting complex protein 320 kDa) | Chd9 (Kiaa0308) (Pric320)   | 39  | 27  | 49 | 27 |

|                 |        |                                                                                                                                                                                         |                                |     |     |    |    |
|-----------------|--------|-----------------------------------------------------------------------------------------------------------------------------------------------------------------------------------------|--------------------------------|-----|-----|----|----|
|                 | P17918 | Proliferating cell nuclear antigen (PCNA) (Cyclin)                                                                                                                                      | Pcna                           | 273 | 207 | 20 | 11 |
|                 | Q9WTU3 | Sodium channel protein type 8 subunit alpha (Sodium channel protein type VIII subunit alpha) (Voltage-gated sodium channel subunit alpha Nav1.6)                                        | Scn8a (Nbna1)                  | 28  | 19  | 20 | 11 |
|                 | O35664 | Interferon-alpha/beta receptor beta chain (Interferon alpha/beta receptor 2) (IFN-alpha-REC) (Type I interferon receptor) (IFN-R)                                                       | Ifnar2                         | 37  | 21  | 11 | 6  |
|                 | Q9WV89 | Syntaxin-binding protein 4 (Syntaxin 4-interacting protein) (Synip) (STX4-interacting protein)                                                                                          | Stxbp4                         | 41  | 19  | 11 | 6  |
|                 | Q9WUJ8 | Origin recognition complex subunit 6                                                                                                                                                    | Orc6l (Orc6)                   | 59  | 37  | 13 | 7  |
|                 | Q9D6F9 | Tubulin beta-4 chain                                                                                                                                                                    | Tubb4                          | 888 | 493 | 58 | 31 |
|                 | O88844 | Isocitrate dehydrogenase [NADP] cytoplasmic (IDH) (EC 1.1.1.42) (Cytosolic NADP-isocitrate dehydrogenase) (Oxalosuccinate decarboxylase) (NADP(+)-specific ICDH) (IDP)                  | Idh1                           | 155 | 163 | 15 | 8  |
|                 | Q61390 | T-complex protein 1 subunit zeta-2 (TCP-1-zeta-2) (CCT-zeta-2) (Cctz-2)                                                                                                                 | Cct6b                          | 55  | 52  | 15 | 8  |
|                 | P11103 | Poly [ADP-ribose] polymerase 1 (PARP-1) (EC 2.4.2.30) (ADPRT) (NAD(+) ADP-ribosyltransferase 1) (Poly[ADP-ribose] synthetase 1) (msPARP)                                                | Parp1 (Adprp) (Adprt) (Adprt1) | 21  | 26  | 17 | 9  |
|                 | Q922F4 | Tubulin beta-6 chain                                                                                                                                                                    | Tubb6                          | 583 | 382 | 40 | 21 |
|                 | P97351 | 40S ribosomal protein S3a                                                                                                                                                               | Rps3a                          | 899 | 392 | 50 | 26 |
|                 | Q9ERD7 | Tubulin beta-3 chain                                                                                                                                                                    | Tubb3                          | 780 | 383 | 52 | 27 |
|                 | Q80UE6 | Serine/threonine-protein kinase WNK4 (EC 2.7.11.1) (Protein kinase with no lysine 4) (Protein kinase, lysine-deficient 4)                                                               | Wnk4 (Prkwnk4)                 | 23  | 33  | 29 | 15 |
| tubulin binding | P54227 | Stathmin (Phosphoprotein p19) (pp19) (Leukemia-associated phosphoprotein p18) (Oncoprotein 18) (Op18) (pp17) (Prosolin) (Metablastin) (Protein Pr22) (Leukemia-associated gene protein) | Stmn1 (Lag) (Lap18) (Pr22)     | 121 | 120 | 10 | 12 |

| Q60575                                   | Kinesin-like protein KIF1B                                                                                                                                                    | Kif1b                                                                                                                                 | 45                        | 95            | 30            | 36              |                 |
|------------------------------------------|-------------------------------------------------------------------------------------------------------------------------------------------------------------------------------|---------------------------------------------------------------------------------------------------------------------------------------|---------------------------|---------------|---------------|-----------------|-----------------|
| P48754                                   | Breast cancer type 1 susceptibility protein homolog                                                                                                                           | Brca1                                                                                                                                 | 28                        | 25            | 26            | 30              |                 |
| Q91X97                                   | Neurocalcin-delta                                                                                                                                                             | Ncald (D15Ert412e)                                                                                                                    | 85                        | 82            | 8             | 9               |                 |
| Q61768                                   | Kinesin-1 heavy chain (Ubiquitous kinesin heavy chain) (UKHC) (Conventional kinesin heavy chain)                                                                              | Kif5b (Khcs) (Kns1)                                                                                                                   | 102                       | 303           | 43            | 41              |                 |
| Q99104                                   | Myosin-Va (Dilute myosin heavy chain, non-muscle)                                                                                                                             | Myo5a (Dilute)                                                                                                                        | 28                        | 34            | 35            | 31              |                 |
| Q91ZU6                                   | Bullous pemphigoid antigen 1, isoforms 1/2/3/4 (BPA) (Hemidesmosomal plaque protein) (Dystonia musculorum protein) (Dystonin)                                                 | Dst (Bpag1)                                                                                                                           | 78                        | 38            | 126           | 100             |                 |
| Q6A078                                   | Centrosomal protein of 290 kDa (Cep290) (Nephrocystin-6)                                                                                                                      | Cep290 (Kiaa0373) (Nphp6)                                                                                                             | 32                        | 57            | 85            | 66              |                 |
| Q7TMK6                                   | Protein Hook homolog 2                                                                                                                                                        | Hook2                                                                                                                                 | 33                        | 36            | 26            | 20              |                 |
| P25233                                   | Necdin                                                                                                                                                                        | Ndn                                                                                                                                   | 30                        | 23            | 16            | 12              |                 |
| Q8C9S8                                   | Cysteine protease ATG4A (EC 3.4.22.-) (Autophagy-related protein 4 homolog A) (Autophagin-2) (Autophagy-related cysteine endopeptidase 2) (AUT-like 2 cysteine endopeptidase) | Atg4a (Apg4a) (Autl2)                                                                                                                 | 26                        | 21            | 6             | 4               |                 |
| Enriched Biological Processes by Panther |                                                                                                                                                                               |                                                                                                                                       |                           |               |               |                 |                 |
| Term                                     | Accession                                                                                                                                                                     | Protein names                                                                                                                         | Genes                     | prot_score_WT | prot_score_KO | prot_matches_WT | prot_matches_KO |
| mRNA transcription regulation            | Q3TCT4                                                                                                                                                                        | Ectonucleoside triphosphate diphosphohydrolase 7 (NTPDase 7) (EC 3.6.1.-) (Lysosomal apyrase-like protein 1)                          | Entpd7 (Kiaa4066) (Lalp1) | 16            | 33            | 42              | 80              |
|                                          | O88705                                                                                                                                                                        | Potassium/sodium hyperpolarization-activated cyclic nucleotide-gated channel 3 (Hyperpolarization-activated cation channel 3) (HAC-3) | Hcn3 (Hac3)               | 75            | 67            | 8               | 15              |

|        |                                                                                                                                                                                     |                   |      |      |     |     |
|--------|-------------------------------------------------------------------------------------------------------------------------------------------------------------------------------------|-------------------|------|------|-----|-----|
| Q99N50 | Synaptotagmin-like protein 2 (Exophilin-4)                                                                                                                                          | Sytl2 (Slp2)      | 26   | 77   | 10  | 18  |
| P56716 | Oxygen-regulated protein 1 (Retinitis pigmentosa RP1 protein homolog)                                                                                                               | Rp1 (Orp1) (Rp1h) | 31   | 49   | 58  | 104 |
| Q8BYC6 | Serine/threonine-protein kinase TAO3 (EC 2.7.11.1) (Thousand and one amino acid protein 3)                                                                                          | Taok3             | 32   | 38   | 9   | 16  |
| P03987 | Ig gamma-3 chain C region                                                                                                                                                           |                   | 30   | 34   | 4   | 7   |
| P62962 | Profilin-1 (Profilin I)                                                                                                                                                             | Pfn1              | 30   | 93   | 4   | 7   |
| Q64674 | Spermidine synthase (SPDSY) (EC 2.5.1.16) (Putrescine aminopropyltransferase)                                                                                                       | Srm               | 55   | 29   | 4   | 7   |
| P56198 | Cell death activator CIDE-3 (Cell death-inducing DFFA-like effector protein C) (Fat-specific protein FSP27)                                                                         | Cidec (Fsp27)     | 51   | 39   | 8   | 14  |
| P18760 | Cofilin-1 (Cofilin, non-muscle isoform)                                                                                                                                             | Cfl1              | 959  | 2552 | 70  | 122 |
| Q9Z1R2 | Large proline-rich protein BAT3 (HLA-B-associated transcript 3)                                                                                                                     | Bat3              | 80   | 49   | 15  | 26  |
| Q9D009 | Putative octanoyltransferase, mitochondrial (EC 2.3.1.181) (Octanoyl-[acyl-carrier-protein]-protein N-octanoyltransferase) (Lipoyl/octanoyl transferase) (Lipoate-protein ligase B) |                   | 38   | 42   | 11  | 19  |
| Q8R1S0 | Ubiquinone biosynthesis monooxygenase COQ6 (EC 1.14.13.-)                                                                                                                           | Coq6              | 42   | 92   | 10  | 17  |
| Q8BFQ9 | Kelch domain-containing protein 5                                                                                                                                                   | Klhdc5 (Kiaa1340) | 30   | 22   | 10  | 17  |
| Q9Z129 | ATP-dependent DNA helicase Q1 (EC 3.6.1.-) (DNA-dependent ATPase Q1)                                                                                                                | Recql (Recql1)    | 17   | 27   | 13  | 22  |
| P52480 | Pyruvate kinase isozymes M1/M2 (EC 2.7.1.40) (Pyruvate kinase muscle isozyme)                                                                                                       | Pkm2 (Pk3) (Pykm) | 1954 | 3481 | 138 | 233 |
| Q8CGP2 | Histone H2B type 1-P                                                                                                                                                                | Hist1h2bp         | 436  | 999  | 46  | 77  |
| Q9Z309 | Calcium and integrin-binding family member 2 (Kinase-interacting protein 2) (KIP 2)                                                                                                 | Cib2 (Kip2)       | 31   | 17   | 3   | 5   |
| P57776 | Elongation factor 1-delta (EF-1-delta)                                                                                                                                              | Eef1d             | 109  | 35   | 3   | 5   |

|        |                                                                                                                                                                                                                                          |                                                                                                                                                 |     |      |    |    |
|--------|------------------------------------------------------------------------------------------------------------------------------------------------------------------------------------------------------------------------------------------|-------------------------------------------------------------------------------------------------------------------------------------------------|-----|------|----|----|
| P62960 | Nuclease-sensitive element-binding protein 1 (Y-box-binding protein 1) (Y-box transcription factor) (YB-1) (CCAAT-binding transcription factor I subunit A) (CBF-A) (Enhancer factor I subunit A) (EFI-A) (DNA-binding protein B) (DBPB) | Ybx1 (Msy-1) (Msy1) (Nsep1) (Yb1)                                                                                                               | 56  | 126  | 6  | 10 |
| P62806 | Histone H4                                                                                                                                                                                                                               | Hist1h4a; Hist1h4b (H4-53); Hist1h4c (H4-12); Hist1h4d; Hist1h4f; Hist1h4h; Hist1h4i; Hist1h4j; Hist1h4k; Hist1h4m; Hist2h4a (Hist2h4); Hist4h4 | 815 | 1617 | 47 | 78 |
| Q64475 | Histone H2B type 1-B (h2B-143)                                                                                                                                                                                                           | Hist1h2bb                                                                                                                                       | 436 | 999  | 46 | 75 |
| P15532 | Nucleoside diphosphate kinase A (NDP kinase A) (NDK A) (EC 2.7.4.6) (Tumor metastatic process-associated protein) (Metastasis inhibition factor NM23) (NDPK-A) (nm23-M1)                                                                 | Nme1 (Nm23)                                                                                                                                     | 150 | 261  | 8  | 13 |
| Q8BHG1 | Nardilysin (EC 3.4.24.61) (N-arginine dibasic convertase) (NRD convertase) (NRD-C)                                                                                                                                                       | Nrd1                                                                                                                                            | 53  | 54   | 13 | 21 |
| Q8VDM4 | 26S proteasome non-ATPase regulatory subunit 2 (26S proteasome regulatory subunit RPN1) (26S proteasome regulatory subunit S2) (26S proteasome subunit p97)                                                                              | Psm2                                                                                                                                            | 113 | 157  | 18 | 29 |
| P19157 | Glutathione S-transferase P 1 (Gst P1) (EC 2.5.1.18) (GST YF-YF) (GST-piB) (GST class-pi) (Preadipocyte growth factor)                                                                                                                   | Gstp1 (GstpiB)                                                                                                                                  | 473 | 572  | 10 | 16 |

|        |                                                                                                                                                 |                                   |     |     |    |     |
|--------|-------------------------------------------------------------------------------------------------------------------------------------------------|-----------------------------------|-----|-----|----|-----|
| Q501J6 | Probable ATP-dependent RNA helicase DDX17 (EC 3.6.1.-) (DEAD box protein 17)                                                                    | Ddx17                             | 90  | 43  | 7  | 11  |
| Q61990 | Poly(rC)-binding protein 2 (Alpha-CP2) (Putative heterogeneous nuclear ribonucleoprotein X) (hnRNP X) (CTBP) (CBP)                              | Pcbp2 (Cbp) (HnrnpX) (Hnrpx)      | 29  | 194 | 7  | 11  |
| Q9D8W5 | 26S proteasome non-ATPase regulatory subunit 12 (26S proteasome regulatory subunit p55)                                                         | Psmd12                            | 67  | 78  | 7  | 11  |
| P14824 | Annexin A6 (Annexin-6) (Annexin VI) (Lipocortin VI) (p68) (p70) (Protein III) (Chromobindin-20) (67 kDa calelectrin) (Calphobindin-II) (CPB-II) | Anxa6 (Anx6)                      | 168 | 591 | 33 | 51  |
| P63158 | High mobility group protein B1 (High mobility group protein 1) (HMG-1)                                                                          | Hmgb1 (Hmg-1) (Hmg1)              | 153 | 405 | 25 | 38  |
| Q60695 | Ral guanine nucleotide dissociation stimulator-like 1 (RalGDS-like 1)                                                                           | Rgl1 (Rgl)                        | 26  | 15  | 4  | 6   |
| O55142 | 60S ribosomal protein L35a                                                                                                                      | Rpl35a                            | 24  | 50  | 4  | 6   |
| Q7TN83 | Synaptotagmin-16 (Synaptotagmin XIV-related protein) (Synaptotagmin 14-like protein)                                                            | Syt16 (Strep14) (Syt14l) (Syt14r) | 20  | 38  | 6  | 9   |
| Q8BUG5 | Calcyphosin-2 (Calcyphosine-2)                                                                                                                  | Caps2                             | 17  | 28  | 8  | 12  |
| P50247 | Adenosylhomocysteinase (AdoHcyase) (EC 3.3.1.1) (S-adenosyl-L-homocysteine hydrolase) (Liver copper-binding protein) (CUBP)                     | Ahcy                              | 90  | 106 | 10 | 15  |
| P83741 | Serine/threonine-protein kinase WNK1 (EC 2.7.11.1) (Protein kinase with no lysine 1) (Protein kinase, lysine-deficient 1)                       | Wnk1 (Prkwnk1)                    | 56  | 36  | 18 | 27  |
| P61982 | 14-3-3 protein gamma                                                                                                                            | Ywhag                             | 653 | 841 | 53 | 79  |
| Q60952 | Centrosome-associated protein CEP250 (Centrosomal protein 2) (Centrosomal Nek2-associated protein 1) (C-Nap1) (Intranuclear matrix protein)     | Cep250 (Cep2) (Inmp)              | 21  | 42  | 90 | 132 |

|        |                                                                                                                                                                                           |                                  |      |      |    |    |
|--------|-------------------------------------------------------------------------------------------------------------------------------------------------------------------------------------------|----------------------------------|------|------|----|----|
| P53657 | Pyruvate kinase isozymes R/L (EC 2.7.1.40) (L PK)                                                                                                                                         | Pklr                             | 144  | 270  | 26 | 38 |
| Q3THW5 | Histone H2A.V (H2A.F/Z)                                                                                                                                                                   | H2afv (H2av)                     | 297  | 426  | 11 | 16 |
| P99026 | Proteasome subunit beta type-4 (Proteasome beta chain) (EC 3.4.25.1) (Macropain beta chain) (Multicatalytic endopeptidase complex beta chain) (Proteasome chain 3)                        | Psmb4 (Lmp3)                     | 93   | 289  | 11 | 16 |
| Q00342 | FL cytokine receptor (EC 2.7.10.1) (Tyrosine-protein kinase receptor flk-2) (Fetal liver kinase 2) (Tyrosine-protein kinase FLT3) (CD antigen CD135)                                      | Flt3 (Flk-2) (Flt3)              | 17   | 34   | 7  | 10 |
| P12813 | Nuclear receptor subfamily 4 group A member 1 (Orphan nuclear receptor HMR) (Nuclear hormone receptor NUR/77) (N10 nuclear protein)                                                       | Nr4a1 (Gfrp) (Hmr) (N10) (Nur77) | 61   | 31   | 7  | 10 |
| O35711 | Liprin-beta-2 (Protein tyrosine phosphatase receptor type f polypeptide-interacting protein-binding protein 2) (PTPRF-interacting protein-binding protein 2) (Coiled-coil-like protein 1) | Ppfibp2 (Cclp1)                  | 108  | 79   | 14 | 20 |
| P70696 | Histone H2B type 1-A (Histone H2B, testis) (Testis-specific histone H2B)                                                                                                                  | Hist1h2ba (Th2b)                 | 146  | 378  | 37 | 51 |
| P05214 | Tubulin alpha-3 chain (Tubulin alpha-3/alpha-7 chain) (Alpha-tubulin 3/7) (Alpha-tubulin isotype M-alpha-3/7)                                                                             | Tuba3a (Tuba3); Tuba3b (Tuba7)   | 1112 | 1288 | 61 | 84 |
| P17047 | Lysosome-associated membrane glycoprotein 2 (LAMP-2) (Lysosomal membrane glycoprotein type B) (LGP-B) (CD107 antigen-like family member B) (CD antigen CD107b)                            | Lamp2 (Lamp-2)                   | 26   | 29   | 8  | 11 |

|        |                                                                                                                                                                                                                                                       |                             |     |      |    |    |
|--------|-------------------------------------------------------------------------------------------------------------------------------------------------------------------------------------------------------------------------------------------------------|-----------------------------|-----|------|----|----|
| P27641 | ATP-dependent DNA helicase 2 subunit 2 (EC 3.6.1.-) (ATP-dependent DNA helicase II 80 kDa subunit) (Ku autoantigen protein p86 homolog) (Ku80) (CTC box-binding factor 85 kDa subunit) (CTCBF) (CTC85) (Nuclear factor IV) (DNA repair protein XRCC5) | Xrcc5 (G22p2)               | 22  | 29   | 16 | 22 |
| Q61937 | Nucleophosmin (NPM) (Nucleolar phosphoprotein B23) (Numatrin) (Nucleolar protein NO38)                                                                                                                                                                | Npm1                        | 92  | 66   | 11 | 15 |
| O08807 | Peroxiredoxin-4 (EC 1.11.1.15) (Prx-IV) (Thioredoxin peroxidase AO372) (Thioredoxin-dependent peroxide reductase A0372) (Antioxidant enzyme AOE372)                                                                                                   | Prdx4                       | 273 | 421  | 25 | 34 |
| P70338 | Zinc finger protein Gfi-1 (Growth factor independent protein 1)                                                                                                                                                                                       | Gfi1 (Gfi-1)                | 45  | 39   | 17 | 23 |
| Q61789 | Laminin subunit alpha-3 (Nicein subunit alpha)                                                                                                                                                                                                        | Lama3                       | 26  | 26   | 37 | 50 |
| Q9ERU9 | E3 SUMO-protein ligase RanBP2 (Ran-binding protein 2)                                                                                                                                                                                                 | Ranbp2                      | 56  | 49   | 40 | 53 |
| P35700 | Peroxiredoxin-1 (EC 1.11.1.15) (Thioredoxin peroxidase 2) (Thioredoxin-dependent peroxide reductase 2) (Osteoblast-specific factor 3) (OSF-3) (Macrophage 23 kDa stress protein)                                                                      | Prdx1 (Msp23) (Paga) (Tdp2) | 836 | 1095 | 75 | 99 |
| Q5SXJ3 | Fanconi anemia group J protein homolog (Protein FACJ) (EC 3.6.1.-) (ATP-dependent RNA helicase BRIP1) (BRCA1-interacting protein C-terminal helicase 1) (BRCA1-interacting protein 1) (BRCA1-associated C-terminal helicase 1)                        | Brip1 (Bach1) (Fancj)       | 25  | 18   | 13 | 17 |
| P70168 | Importin subunit beta-1 (Karyopherin subunit beta-1) (Nuclear factor P97) (Pore targeting complex 97 kDa subunit) (PTAC97) (SCG)                                                                                                                      | Kpnb1 (Impnb)               | 48  | 17   | 13 | 17 |



|        |                                                                                                                                                                         |                                  |     |     |    |    |
|--------|-------------------------------------------------------------------------------------------------------------------------------------------------------------------------|----------------------------------|-----|-----|----|----|
| Q9Z277 | Bromodomain adjacent to zinc finger domain protein 1B (Williams-Beuren syndrome chromosomal region 9 protein homolog) (WBRS9)                                           | Baz1b (Wbscr9)                   | 43  | 17  | 26 | 34 |
| Q61846 | Maternal embryonic leucine zipper kinase (EC 2.7.11.1) (Protein kinase PK38) (mPK38)                                                                                    | Melk (Kiaa0175) (Pk38)           | 28  | 32  | 10 | 13 |
| P63321 | Ras-related protein Ral-A                                                                                                                                               | Rala (Ral) (Rala)                | 25  | 22  | 30 | 39 |
| Q8CIM1 | Leucine-rich repeat-containing protein 45                                                                                                                               | Lrrc45                           | 33  | 71  | 27 | 35 |
| Q7TQ07 | DNA polymerase nu (EC 2.7.7.7)                                                                                                                                          | Poln                             | 20  | 39  | 14 | 18 |
| Q07133 | Histone H1t (Testicular H1 histone)                                                                                                                                     | Hist1h1t (H1ft) (H1t)            | 46  | 72  | 54 | 69 |
| P27661 | Histone H2A.x (H2a/x)                                                                                                                                                   | H2afx (H2a.x) (H2ax) (Hist5-2ax) | 301 | 426 | 15 | 19 |
| P61028 | Ras-related protein Rab-8B                                                                                                                                              | Rab8b                            | 17  | 59  | 4  | 5  |
| Q80X50 | Ubiquitin-associated protein 2-like                                                                                                                                     | Ubp2l                            | 63  | 54  | 4  | 5  |
| Q60716 | Prolyl 4-hydroxylase subunit alpha-2 (EC 1.14.11.2) (4-PH alpha-2) (Procollagen-proline,2-oxoglutarate-4-dioxygenase subunit alpha-2)                                   | P4ha2                            | 22  | 27  | 8  | 10 |
| Q63ZW7 | InaD-like protein (Inadl protein) (Pals1-associated tight junction protein) (Protein associated to tight junctions) (Channel-interacting PDZ domain-containing protein) | Inadl (Cipp) (Patj)              | 18  | 30  | 12 | 15 |
| P31001 | Desmin                                                                                                                                                                  | Des                              | 169 | 224 | 25 | 31 |
| Q61316 | Heat shock 70 kDa protein 4 (Heat shock 70-related protein APG-2)                                                                                                       | Hspa4 (Apg2) (Hsp110)            | 379 | 792 | 42 | 52 |
| Q8R2X8 | Golgin-45 (Basic leucine zipper nuclear factor 1)                                                                                                                       | Blzf1                            | 28  | 22  | 13 | 16 |
| Q8BGD9 | Eukaryotic translation initiation factor 4B (eIF-4B)                                                                                                                    | Eif4b                            | 238 | 306 | 13 | 16 |

|        |                                                                                                                                                                                                                             |                           |    |     |    |    |
|--------|-----------------------------------------------------------------------------------------------------------------------------------------------------------------------------------------------------------------------------|---------------------------|----|-----|----|----|
| Q61466 | SWI/SNF-related matrix-associated actin-dependent regulator of chromatin subfamily D member 1 (SWI/SNF complex 60 kDa subunit) (60 kDa BRG-1/Brm-associated factor subunit A) (BRG1-associated factor 60A) (D15KZ1 protein) | Smarcd1 (Baf60a) (D15Kz1) | 27 | 29  | 13 | 16 |
| P59270 | Galactosylgalactosylxylosylprotein 3-beta-glucuronosyltransferase 2 (EC 2.4.1.135) (Beta-1,3-glucuronyltransferase 2) (UDP-glucuronosyltransferase-S) (Glucuronosyltransferase-S) (GlcAT-S) (GlcAT-D)                       | B3gat2 (Glcats)           | 29 | 16  | 9  | 11 |
| Q8VII8 | Mineralocorticoid receptor (MR) (Nuclear receptor subfamily 3 group C member 2)                                                                                                                                             | Nr3c2 (Mlr)               | 28 | 22  | 18 | 22 |
| Q9R1P0 | Proteasome subunit alpha type-4 (EC 3.4.25.1) (Proteasome component C9) (Macropain subunit C9) (Multicatalytic endopeptidase complex subunit C9) (Proteasome subunit L)                                                     | Psma4                     | 29 | 151 | 14 | 17 |
| O08648 | Mitogen-activated protein kinase kinase kinase 4 (EC 2.7.11.25) (MAPK/ERK kinase kinase 4) (MEK kinase 4) (MEKK 4)                                                                                                          | Map3k4 (Mekk4)            | 37 | 16  | 19 | 23 |
| O35618 | Protein Mdm4 (p53-binding protein Mdm4) (Mdm2-like p53-binding protein) (Protein Mdmx) (Double minute 4 protein)                                                                                                            | Mdm4 (Mdmx)               | 17 | 29  | 5  | 6  |
| Q8VHS2 | Crumbs homolog 1                                                                                                                                                                                                            | Crb1                      | 23 | 28  | 10 | 12 |
| Q60848 | Lymphocyte-specific helicase (EC 3.6.1.-) (Proliferation associated SNF2-like protein)                                                                                                                                      | Hells (Lsh) (Pasg)        | 37 | 35  | 10 | 12 |
| Q8BFY9 | Transportin-1 (Importin beta-2) (Karyopherin beta-2)                                                                                                                                                                        | Tnp1 (Kpnb2)              | 54 | 43  | 10 | 12 |
| Q9QUR6 | Prolyl endopeptidase (PE) (EC 3.4.21.26) (Post-proline cleaving enzyme)                                                                                                                                                     | Prep (Pep)                | 56 | 20  | 15 | 18 |
| P80315 | T-complex protein 1 subunit delta (TCP-1-delta) (CCT-delta) (A45)                                                                                                                                                           | Cct4 (Cctd)               | 61 | 59  | 15 | 18 |

|        |                                                                                                                                                        |                        |     |     |    |    |
|--------|--------------------------------------------------------------------------------------------------------------------------------------------------------|------------------------|-----|-----|----|----|
| O08908 | Phosphatidylinositol 3-kinase regulatory subunit beta (PI3-kinase p85 subunit beta) (PtdIns-3-kinase p85-beta)                                         | Pik3r2                 | 19  | 25  | 20 | 24 |
| Q60575 | Kinesin-like protein KIF1B                                                                                                                             | Kif1b                  | 45  | 95  | 30 | 36 |
| Q61771 | Kinesin-like protein KIF3B (Microtubule plus end-directed kinesin motor 3B)                                                                            | Kif3b                  | 30  | 51  | 16 | 19 |
| Q9R0K7 | Plasma membrane calcium-transporting ATPase 2 (PMCA2) (EC 3.6.3.8) (Plasma membrane calcium ATPase isoform 2) (Plasma membrane calcium pump isoform 2) | Atp2b2 (Pmca2)         | 32  | 27  | 70 | 83 |
| P80313 | T-complex protein 1 subunit eta (TCP-1-eta) (CCT-eta)                                                                                                  | Cct7 (Ccth)            | 49  | 50  | 11 | 13 |
| Q61171 | Peroxiredoxin-2 (EC 1.11.1.15) (Thioredoxin peroxidase 1) (Thioredoxin-dependent peroxide reductase 1) (Thiol-specific antioxidant protein) (TSA)      | Prdx2 (Tdp1) (Tpx)     | 568 | 898 | 47 | 55 |
| Q61122 | NGFI-A-binding protein 1 (EGR-1-binding protein 1)                                                                                                     | Nab1                   | 30  | 25  | 6  | 7  |
| Q80XA6 | RalBP1-associated Eps domain-containing protein 2 (RalBP1-interacting protein 2) (Partner of RalBP1)                                                   | Reps2 (Pob1)           | 33  | 31  | 6  | 7  |
| Q9WUM4 | Coronin-1C (Coronin-3)                                                                                                                                 | Coro1c                 | 42  | 28  | 18 | 21 |
| Q6GSS7 | Histone H2A type 2-A (H2A.2) (H2a-614) (H2a-615)                                                                                                       | Hist2h2aa1; Hist2h2aa2 | 505 | 763 | 18 | 21 |
| P48754 | Breast cancer type 1 susceptibility protein homolog                                                                                                    | Brca1                  | 28  | 25  | 26 | 30 |
| Q62418 | Drebrin-like protein (SH3 domain-containing protein 7) (Actin-binding protein 1)                                                                       | Dbn1 (Abp1) (Sh3p7)    | 24  | 39  | 7  | 8  |
| Q9Z2K1 | Keratin, type I cytoskeletal 16 (Cytokeratin-16) (CK-16) (Keratin-16) (K16)                                                                            | Krt16 (Krt1-16)        | 37  | 37  | 7  | 8  |

|        |                                                                                                                                                                                                                                                                                                                    |                                  |     |     |    |    |
|--------|--------------------------------------------------------------------------------------------------------------------------------------------------------------------------------------------------------------------------------------------------------------------------------------------------------------------|----------------------------------|-----|-----|----|----|
| Q9QWY8 | 130 kDa phosphatidylinositol 4,5-biphosphate-dependent ARF1 GTPase-activating protein (PIP2-dependent ARF1 GAP) (ADP-ribosylation factor-directed GTPase-activating protein 1) (ARF GTPase-activating protein 1) (Development and differentiation-enhancing factor 1) (Differentiation-enhancing factor 1) (DEF-1) | Ddef1 (Asap1) (Kiaa1249) (Shag1) | 26  | 23  | 14 | 16 |
| Q6A4J8 | Ubiquitin carboxyl-terminal hydrolase 7 (EC 3.1.2.15) (Ubiquitin thioesterase 7) (Ubiquitin-specific-processing protease 7) (Deubiquitinating enzyme 7) (Herpesvirus-associated ubiquitin-specific protease) (mHAUSP)                                                                                              | Usp7 (Hausp)                     | 27  | 18  | 14 | 16 |
| P97820 | Mitogen-activated protein kinase kinase kinase kinase 4 (EC 2.7.11.1) (MAPK/ERK kinase kinase kinase 4) (MEK kinase kinase 4) (MEKKK 4) (HPK/GCK-like kinase HGK) (Nck-interacting kinase)                                                                                                                         | Map4k4 (Nik)                     | 65  | 54  | 15 | 17 |
| P62270 | 40S ribosomal protein S18 (Ke-3) (Ke3)                                                                                                                                                                                                                                                                             | Rps18                            | 210 | 209 | 15 | 17 |
| P55200 | Histone-lysine N-methyltransferase HRX (EC 2.1.1.43) (Zinc finger protein HRX) (ALL-1)                                                                                                                                                                                                                             | Mll (All1) (Hrx) (Mll1)          | 67  | 26  | 39 | 44 |
| P62908 | 40S ribosomal protein S3                                                                                                                                                                                                                                                                                           | Rps3                             | 778 | 762 | 39 | 44 |
| P40124 | Adenylyl cyclase-associated protein 1 (CAP 1)                                                                                                                                                                                                                                                                      | Cap1 (Cap)                       | 22  | 43  | 8  | 9  |
| Q91X97 | Neurocalcin-delta                                                                                                                                                                                                                                                                                                  | Ncald (D15Ert412e)               | 85  | 82  | 8  | 9  |
| Q64311 | Protein N-terminal asparagine amidohydrolase (EC 3.5.1.-) (Protein NH2-terminal asparagine deamidase) (PNAD) (N-terminal Asn amidase) (NTN-amidase) (Protein NH2-terminal asparagine amidohydrolase) (PNAA)                                                                                                        | Ntan1                            | 20  | 26  | 8  | 9  |

|        |                                                                                                                                                                                                                     |                                   |     |     |    |    |
|--------|---------------------------------------------------------------------------------------------------------------------------------------------------------------------------------------------------------------------|-----------------------------------|-----|-----|----|----|
| Q9WUU9 | 80 kDa MCM3-associated protein (Protein GANP)                                                                                                                                                                       | Mcm3ap (Ganp) (Map80)             | 48  | 32  | 17 | 19 |
| Q64467 | Glyceraldehyde-3-phosphate dehydrogenase, testis-specific (EC 1.2.1.12) (Spermatogenic glyceraldehyde-3-phosphate dehydrogenase) (Spermatogenic cell-specific glyceraldehyde 3-phosphate dehydrogenase 2) (GAPDH-2) | Gapdhs (Gapds) (Gapds)            | 75  | 781 | 26 | 29 |
| P41230 | Histone demethylase JARID1C (EC 1.14.11.-) (Jumonji/ARID domain-containing protein 1C) (Protein SmcX) (Protein Xe169)                                                                                               | Jarid1c (Kiaa0234) (Smcx) (Xe169) | 34  | 32  | 26 | 29 |
| Q60864 | Stress-induced-phosphoprotein 1 (STI1) (mSTI1) (Hsc70/Hsp90-organizing protein) (Hop)                                                                                                                               | Stip1                             | 257 | 245 | 19 | 21 |
| Q91ZT5 | FYVE, RhoGEF and PH domain-containing protein 4 (Actin filament-binding protein frabin) (FGD1-related F-actin-binding protein)                                                                                      | Fgd4                              | 29  | 19  | 10 | 11 |
| O55234 | Proteasome subunit beta type-5 (EC 3.4.25.1) (Proteasome epsilon chain) (Macropain epsilon chain) (Multicatalytic endopeptidase complex epsilon chain) (Proteasome subunit X) (Proteasome chain 6)                  | Psmb5                             | 168 | 227 | 10 | 11 |
| Q9R0Q7 | Prostaglandin E synthase 3 (EC 5.3.99.3) (Cytosolic prostaglandin E2 synthase) (cPGES) (Telomerase-binding protein p23) (Hsp90 co-chaperone) (Progesterone receptor complex p23) (Sid 3177)                         | Ptges3 (Sid3177) (Tebp)           | 124 | 239 | 10 | 11 |
| P49717 | DNA replication licensing factor MCM4 (CDC21 homolog) (P1-CDC21)                                                                                                                                                    | Mcm4 (Cdc21) (Mcmd4)              | 29  | 18  | 11 | 12 |

|        |                                                                                                                                                                                                             |                                    |      |      |     |     |
|--------|-------------------------------------------------------------------------------------------------------------------------------------------------------------------------------------------------------------|------------------------------------|------|------|-----|-----|
| Q3THS6 | S-adenosylmethionine synthetase isoform type 2 (AdoMet synthetase 2) (EC 2.5.1.6) (Methionine adenosyltransferase 2)                                                                                        | Mat2a                              | 26   | 42   | 11  | 12  |
| Q99KK9 | Probable histidyl-tRNA synthetase, mitochondrial (EC 6.1.1.21) (Histidine--tRNA ligase) (HisRS) (Histidine--tRNA ligase-like)                                                                               | Hars2 (Harsl)                      | 20   | 41   | 22  | 24  |
| P07901 | Heat shock protein HSP 90-alpha (HSP 86) (Tumor-specific transplantation 86 kDa antigen) (TSTA)                                                                                                             | Hsp90aa1 (Hsp86) (Hsp86-1) (Hspca) | 1529 | 2324 | 134 | 146 |
| Q6P9Z1 | SWI/SNF-related matrix-associated actin-dependent regulator of chromatin subfamily D member 3 (60 kDa BRG-1/Brm-associated factor subunit C) (BRG1-associated factor 60C) (mBAF60c)                         | Smarcd3 (Baf60c)                   | 29   | 19   | 46  | 50  |
| P38647 | Stress-70 protein, mitochondrial (75 kDa glucose-regulated protein) (GRP 75) (Heat shock 70 kDa protein 9) (Peptide-binding protein 74) (PBP74) (P66 MOT) (Mortalin)                                        | Hspa9 (Grp75) (Hsp74) (Hspa9a)     | 33   | 33   | 12  | 13  |
| P10126 | Elongation factor 1-alpha 1 (EF-1-alpha-1) (Elongation factor 1 A-1) (eEF1A-1) (Elongation factor Tu) (EF-Tu)                                                                                               | Eef1a1 (Eef1a)                     | 2004 | 2344 | 305 | 330 |
| P08113 | Endoplasmic reticulum chaperone protein (Heat shock protein 90 kDa beta member 1) (94 kDa glucose-regulated protein) (GRP94) (ERP99) (Polymorphic tumor rejection antigen 1) (Tumor rejection antigen gp96) | Hsp90b1 (Tra1) (Tra1)              | 221  | 298  | 25  | 27  |
| Q8CH62 | Oral cancer overexpressed protein 1 homolog                                                                                                                                                                 | Oraov1                             | 37   | 31   | 14  | 15  |
| P11984 | T-complex protein 1 subunit alpha A (TCP-1-alpha) (CCT-alpha) (Tailless complex polypeptide 1A) (TCP-1-A)                                                                                                   | Cct1 (Ccta) (Tcp1)                 | 29   | 66   | 14  | 15  |
| Q3TY86 | Apoptosis-inducing factor 3 (EC 1.-.-.-) (Apoptosis-inducing factor-like protein)                                                                                                                           | Aifm3 (Aifl)                       | 42   | 26   | 28  | 30  |

|        |                                                                                                                                                                                                                                                                                                                                        |                               |      |      |    |    |
|--------|----------------------------------------------------------------------------------------------------------------------------------------------------------------------------------------------------------------------------------------------------------------------------------------------------------------------------------------|-------------------------------|------|------|----|----|
| P70398 | Probable ubiquitin carboxyl-terminal hydrolase FAF-X (EC 3.1.2.15) (Ubiquitin thioesterase FAF-X) (Ubiquitin-specific-processing protease FAF-X) (Deubiquitinating enzyme FAF-X) (Fat facets protein-related, X-linked) (Ubiquitin-specific protease 9, X chromosome) (Ubiquitin carboxyl-terminal hydrolase FAM) (Fat facets homolog) | Usp9x (Faf1) (Fam)            | 42   | 28   | 57 | 61 |
| Q8BKX6 | Serine/threonine-protein kinase SMG1 (SMG-1) (EC 2.7.11.1)                                                                                                                                                                                                                                                                             | Smg1 (Kiaa0421)               | 33   | 27   | 30 | 32 |
| P16858 | Glyceraldehyde-3-phosphate dehydrogenase (GAPDH) (EC 1.2.1.12)                                                                                                                                                                                                                                                                         | Gapdh (Gapd)                  | 1514 | 1781 | 84 | 89 |
| P62242 | 40S ribosomal protein S8                                                                                                                                                                                                                                                                                                               | Rps8                          | 479  | 372  | 18 | 19 |
| Q76MZ3 | Serine/threonine-protein phosphatase 2A 65 kDa regulatory subunit A alpha isoform (PP2A, subunit A, PR65-alpha isoform) (PP2A, subunit A, R1-alpha isoform)                                                                                                                                                                            | Ppp2r1a                       | 142  | 242  | 22 | 23 |
| P16546 | Spectrin alpha chain, brain (Spectrin, non-erythroid alpha chain) (Alpha-II spectrin) (Fodrin alpha chain)                                                                                                                                                                                                                             | Sptan1 (Spna2) (Spta2)        | 68   | 86   | 66 | 69 |
| Q61820 | GTP-binding nuclear protein Ran, testis-specific isoform                                                                                                                                                                                                                                                                               | Rasl2-9                       | 564  | 570  | 23 | 24 |
| Q62504 | Msx2-interacting protein (SPEN homolog) (SMART/HDAC1-associated repressor protein)                                                                                                                                                                                                                                                     | Spn (Kiaa0929) (Mint) (Sharp) | 27   | 18   | 72 | 75 |
| Q6P4S8 | Integrator complex subunit 1 (Int1)                                                                                                                                                                                                                                                                                                    | Ints1                         | 25   | 33   | 26 | 27 |
| O35973 | Period circadian protein homolog 1 (Circadian clock protein PERIOD 1) (Circadian pacemaker protein Rigui) (mPER1)                                                                                                                                                                                                                      | Per1 (Per) (Rigui)            | 29   | 21   | 27 | 28 |
| P62281 | 40S ribosomal protein S11                                                                                                                                                                                                                                                                                                              | Rps11                         | 166  | 132  | 27 | 28 |
| Q8CGM2 | Retinitis pigmentosa 1-like 1 protein (Retinitis pigmentosa 1-like protein 1)                                                                                                                                                                                                                                                          | Rp11 (Rp1hl1)                 | 30   | 21   | 58 | 60 |
| P26039 | Talin-1                                                                                                                                                                                                                                                                                                                                | Tln1 (Tln)                    | 123  | 161  | 41 | 42 |

|        |                                                                                                                                                                                                       |                                                   |     |     |     |     |
|--------|-------------------------------------------------------------------------------------------------------------------------------------------------------------------------------------------------------|---------------------------------------------------|-----|-----|-----|-----|
| Q9JM05 | E3 SUMO-protein ligase PIAS4 (Protein inhibitor of activated STAT protein 4) (Protein inhibitor of activated STAT protein gamma) (PIAS-gamma) (PIASy)                                                 | Pias4 (Piasg)                                     | 26  | 29  | 162 | 165 |
| P09586 | Prolactin-3B1 (Chorionic somatomammotropin hormone 2) (Placental lactogen II) (PL-II)                                                                                                                 | Prl3b1 (Csh2) (PI-2) (PI2)                        | 29  | 21  | 2   | 2   |
| P26350 | Prothymosin alpha [Cleaved into: Thymosin alpha]                                                                                                                                                      | Ptma                                              | 34  | 120 | 2   | 2   |
| P62141 | Serine/threonine-protein phosphatase PP1-beta catalytic subunit (PP-1B) (EC 3.1.3.16)                                                                                                                 | Ppp1cb                                            | 177 | 57  | 4   | 4   |
| Q60865 | Caprin-1 (Cytoplasmic activation- and proliferation-associated protein 1) (GPI-anchored membrane protein 1) (GPI-anchored protein p137) (p137GPI) (Membrane component chromosome 11 surface marker 1) | Caprin1 (Gpiap) (Gpiap1) (Gpip137) (M11s1) (G5E5) | 20  | 26  | 5   | 5   |
| P12367 | cAMP-dependent protein kinase type II-alpha regulatory subunit                                                                                                                                        | Prkar2a                                           | 33  | 23  | 5   | 5   |
| Q3TXZ1 | Zinc finger protein 575                                                                                                                                                                               | Znf575 (Zfp575)                                   | 30  | 25  | 5   | 5   |
| Q8VCZ3 | THAP domain-containing protein 7                                                                                                                                                                      | Thap7                                             | 26  | 18  | 6   | 6   |
| Q9R1P1 | Proteasome subunit beta type-3 (EC 3.4.25.1) (Proteasome theta chain) (Proteasome chain 13) (Proteasome component C10-II)                                                                             | Psmb3                                             | 87  | 135 | 7   | 7   |
| Q9R190 | Metastasis-associated protein MTA2 (Metastasis-associated 1-like 1)                                                                                                                                   | Mta2 (Mta111)                                     | 27  | 26  | 9   | 9   |
| Q6P5F9 | Exportin-1 (Exp1) (Chromosome region maintenance 1 protein homolog)                                                                                                                                   | Xpo1 (Crm1)                                       | 19  | 43  | 9   | 9   |
| Q9DAI4 | Zinc finger and BTB domain-containing protein 43 (Zinc finger protein 297B)                                                                                                                           | Zbtb43 (Kiaa0414) (Zfp297b) (Znf297b)             | 23  | 51  | 9   | 9   |



|        |                                                                                                                                                                          |                     |     |     |    |    |
|--------|--------------------------------------------------------------------------------------------------------------------------------------------------------------------------|---------------------|-----|-----|----|----|
| O54951 | Semaphorin-6B (Semaphorin VIB) (Sema VIB) (Semaphorin-N) (Sema N)                                                                                                        | Sema6b (Seman)      | 34  | 25  | 10 | 10 |
| Q9CQ60 | 6-phosphogluconolactonase (6PGL) (EC 3.1.1.31)                                                                                                                           | Pgls                | 148 | 41  | 11 | 11 |
| O09061 | Proteasome subunit beta type-1 (EC 3.4.25.1) (Proteasome component C5) (Macropain subunit C5) (Multicatalytic endopeptidase complex subunit C5) (Proteasome gamma chain) | Psmb1               | 84  | 94  | 11 | 11 |
| Q61092 | Laminin subunit gamma-2 (Laminin 5 gamma 2 subunit) (Kalinin/nicein/epiligrin 100 kDa subunit) (Laminin B2t chain)                                                       | Lamc2               | 33  | 29  | 13 | 13 |
| Q80YV4 | Pantothenate kinase 4 (EC 2.7.1.33) (Pantothenic acid kinase 4) (mPanK4)                                                                                                 | Pank4               | 23  | 28  | 13 | 13 |
| Q9DB77 | Cytochrome b-c1 complex subunit 2, mitochondrial (Ubiquinol-cytochrome-c reductase complex core protein 2) (Core protein II) (Complex III subunit 2)                     | Uqcrc2              | 29  | 20  | 13 | 13 |
| P25206 | DNA replication licensing factor MCM3 (DNA polymerase alpha holoenzyme-associated protein P1) (P1-MCM3)                                                                  | Mcm3 (Mcmd) (Mcmd3) | 74  | 185 | 15 | 15 |
| Q01098 | Glutamate [NMDA] receptor subunit epsilon-3 (N-methyl D-aspartate receptor subtype 2C) (NMDAR2C) (NR2C)                                                                  | Grin2c              | 18  | 33  | 15 | 15 |
| O08788 | Dynactin subunit 1 (150 kDa dynein-associated polypeptide) (DAP-150) (DP-150) (p150-glued)                                                                               | Dctn1               | 64  | 70  | 19 | 19 |
| Q8BSS9 | Liprin-alpha-2 (Protein tyrosine phosphatase receptor type f polypeptide-interacting protein alpha-2) (PTPRF-interacting protein alpha-2)                                | Ppfia2              | 36  | 21  | 22 | 22 |
| Q80UK8 | Integrator complex subunit 2 (Int2)                                                                                                                                      | Ints2 (Kiaa1287)    | 16  | 27  | 24 | 24 |
| Q6P8J7 | Creatine kinase, sarcomeric mitochondrial (EC 2.7.3.2) (S-MtCK)                                                                                                          | Ckmt2               | 50  | 66  | 26 | 26 |

|        |                                                                                                                                                                                             |                                       |      |      |     |     |
|--------|---------------------------------------------------------------------------------------------------------------------------------------------------------------------------------------------|---------------------------------------|------|------|-----|-----|
| Q62261 | Spectrin beta chain, brain 1 (Spectrin, non-erythroid beta chain 1) (Beta-II spectrin) (Fodrin beta chain) (Embryonic liver fodrin)                                                         | Sptbn1 (Elf) (Spnb-2) (Spnb2) (Sptb2) | 56   | 54   | 48  | 48  |
| Q9QYX7 | Protein piccolo (Aczonin) (Multidomain presynaptic cytomatrix protein) (Brain-derived HLMN protein)                                                                                         | Pclo (Acz)                            | 101  | 117  | 114 | 114 |
| P11499 | Heat shock protein HSP 90-beta (HSP 84) (Tumor-specific transplantation 84 kDa antigen) (TSTA)                                                                                              | Hsp90ab1 (Hsp84) (Hsp84-1) (Hspcb)    | 2943 | 3523 | 208 | 205 |
| P58252 | Elongation factor 2 (EF-2)                                                                                                                                                                  | Eef2                                  | 1630 | 1718 | 128 | 126 |
| Q91YE5 | Bromodomain adjacent to zinc finger domain protein 2A (Transcription termination factor I-interacting protein 5) (TTF-I-interacting protein 5) (Tip5)                                       | Baz2a (Tip5)                          | 36   | 15   | 56  | 55  |
| P23116 | Eukaryotic translation initiation factor 3 subunit A (eIF3a) (Eukaryotic translation initiation factor 3 subunit 10) (eIF-3-theta) (eIF3 p167) (eIF3 p180) (eIF3 p185) (p162) (Centrosomin) | Eif3a (Csm) (Eif3) (Eif3s10)          | 199  | 166  | 58  | 56  |
| O08638 | Myosin-11 (Myosin heavy chain 11) (Myosin heavy chain, smooth muscle isoform) (SMMHC)                                                                                                       | Myh11                                 | 211  | 221  | 79  | 76  |
| P16406 | Glutamyl aminopeptidase (EC 3.4.11.7) (EAP) (Aminopeptidase A) (APA) (BP-1/6C3 antigen) (CD antigen CD249)                                                                                  | Enpep                                 | 98   | 90   | 48  | 46  |
| Q8BGQ7 | Alanyl-tRNA synthetase, cytoplasmic (EC 6.1.1.7) (Alanine--tRNA ligase) (AlaRS)                                                                                                             | Aars                                  | 179  | 216  | 23  | 22  |
| Q91V92 | ATP-citrate synthase (EC 2.3.3.8) (ATP-citrate (pro-S)-lyase) (Citrate cleavage enzyme)                                                                                                     | Acly                                  | 349  | 488  | 45  | 43  |
| Q8R1B4 | Eukaryotic translation initiation factor 3 subunit C (eIF3c) (Eukaryotic translation initiation factor 3 subunit 8) (eIF3 p110)                                                             | Eif3c (Eif3s8)                        | 34   | 63   | 22  | 21  |

|        |                                                                                                                                                                                             |                                   |      |      |     |     |
|--------|---------------------------------------------------------------------------------------------------------------------------------------------------------------------------------------------|-----------------------------------|------|------|-----|-----|
| P62827 | GTP-binding nuclear protein Ran (GTPase Ran) (Ras-related nuclear protein) (Ras-like protein TC4)                                                                                           | Ran (Rasl2-8)                     | 756  | 656  | 38  | 36  |
| P54869 | Hydroxymethylglutaryl-CoA synthase, mitochondrial (HMG-CoA synthase) (EC 2.3.3.10) (3-hydroxy-3-methylglutaryl coenzyme A synthase)                                                         | Hmgcs2                            | 26   | 23   | 18  | 17  |
| P03966 | N-myc proto-oncogene protein                                                                                                                                                                | Mycn (Nmyc) (Nmyc1)               | 65   | 46   | 18  | 17  |
| Q04447 | Creatine kinase B-type (EC 2.7.3.2) (Creatine kinase B chain) (B-CK)                                                                                                                        | Ckb (Ckbb)                        | 9079 | 7277 | 434 | 406 |
| Q8BTI8 | Serine/arginine repetitive matrix protein 2                                                                                                                                                 | Srrm2 (Kiaa0324)                  | 78   | 70   | 92  | 86  |
| Q9CPR4 | 60S ribosomal protein L17                                                                                                                                                                   | Rpl17                             | 187  | 135  | 15  | 14  |
| Q99PF4 | Cadherin-23 (Otocadherin)                                                                                                                                                                   | Cdh23                             | 29   | 32   | 29  | 27  |
| Q9D6Z1 | Nucleolar protein 5A (Nucleolar protein Nop56)                                                                                                                                              | Nol5a (Nop56)                     | 38   | 39   | 14  | 13  |
| Q8R5G7 | Centaurin-delta-3 (Cnt-d3) (Arf-GAP, Rho-GAP, ankyrin repeat and pleckstrin homology domain-containing protein 3) (Dual specificity Rho- and Arf-GTPase-activating protein 1)               | Centd3 (Arap3) (Drag1) (Kiaa4097) | 21   | 27   | 26  | 24  |
| Q7TMY8 | E3 ubiquitin-protein ligase HUWE1 (EC 6.3.2.-) (HECT, UBA and WWE domain-containing protein 1) (Upstream regulatory element-binding protein 1) (URE-binding protein 1) (URE-B1) (E3Histone) | Huwe1 (Kiaa0312) (Ureb1)          | 33   | 91   | 39  | 36  |
| O35206 | Collagen alpha-1(XV) chain [Cleaved into: Endostatin (Endostatin-XV)]                                                                                                                       | Col15a1                           | 31   | 37   | 12  | 11  |
| P35969 | Vascular endothelial growth factor receptor 1 (VEGFR-1) (EC 2.7.10.1) (Tyrosine-protein kinase receptor FLT) (FLT-1) (Embryonic receptor kinase 2)                                          | Flt1 (Emrk2) (Flt)                | 29   | 36   | 35  | 32  |
| Q01853 | Transitional endoplasmic reticulum ATPase (TER ATPase) (15S Mg(2+)-ATPase p97 subunit) (Valosin-containing protein) (VCP)                                                                   | Vcp                               | 691  | 699  | 56  | 51  |

|        |                                                                                                                                                                                                                                |                        |     |     |     |     |
|--------|--------------------------------------------------------------------------------------------------------------------------------------------------------------------------------------------------------------------------------|------------------------|-----|-----|-----|-----|
| Q9WTR0 | Matrix metalloproteinase-16 (MMP-16) (EC 3.4.24.-) (Membrane-type matrix metalloproteinase 3) (MT-MMP 3) (MTMMP3) (Membrane-type-3 matrix metalloproteinase) (MT3-MMP) (MT3MMP)                                                | Mmp16                  | 17  | 36  | 11  | 10  |
| P03995 | Glial fibrillary acidic protein (GFAP)                                                                                                                                                                                         | Gfap                   | 63  | 90  | 22  | 20  |
| Q8R4U7 | Leucine zipper protein 1 (Leucine zipper motif-containing protein)                                                                                                                                                             | Luzp1 (Luzp)           | 31  | 32  | 22  | 20  |
| Q8CGC7 | Bifunctional aminoacyl-tRNA synthetase [Includes: Glutamyl-tRNA synthetase (EC 6.1.1.17) (Glutamate--tRNA ligase); Prolyl-tRNA synthetase (EC 6.1.1.15) (Proline--tRNA ligase)]                                                | Eprs (Qprs)            | 130 | 102 | 32  | 29  |
| Q8VDD5 | Myosin-9 (Myosin heavy chain 9) (Myosin heavy chain, non-muscle IIa) (Non-muscle myosin heavy chain IIa) (NMMHC II-a) (NMMHC-IIA) (Cellular myosin heavy chain, type A) (Non-muscle myosin heavy chain-A) (NMMHC-A)            | Myh9                   | 780 | 839 | 127 | 115 |
| P07310 | Creatine kinase M-type (EC 2.7.3.2) (Creatine kinase M chain) (M-CK)                                                                                                                                                           | Ckm (Ckmm)             | 73  | 107 | 31  | 28  |
| Q91VX2 | Ubiquitin-associated protein 2 (Protein lingerer homolog 1) (MLig-1)                                                                                                                                                           | Ubap2 (Lig1)           | 60  | 41  | 10  | 9   |
| P43406 | Integrin alpha-V (Vitronectin receptor subunit alpha) (CD antigen CD51) [Cleaved into: Integrin alpha-V heavy chain; Integrin alpha-V light chain]                                                                             | Itgav                  | 23  | 35  | 19  | 17  |
| Q925Q8 | Dachshund homolog 2 (Dach2)                                                                                                                                                                                                    | Dach2                  | 22  | 30  | 9   | 8   |
| Q9JIL4 | PDZ domain-containing protein 1 (CFTR-associated protein of 70 kDa) (Na/Pi cotransporter C-terminal-associated protein) (NaPi-Cap1) (Sodium-hydrogen exchanger regulatory factor 3) (Na(+)/H(+) exchanger regulatory factor 3) | Pdzk1 (Cap70) (Nherf3) | 29  | 39  | 9   | 8   |
| P43277 | Histone H1.3 (H1 VAR.4) (H1d)                                                                                                                                                                                                  | Hist1h1d (H1f3)        | 78  | 99  | 18  | 16  |

|        |                                                                                                                                                                 |                                    |     |      |    |    |
|--------|-----------------------------------------------------------------------------------------------------------------------------------------------------------------|------------------------------------|-----|------|----|----|
| Q9QXA7 | Tripartite motif-containing protein 44 (Protein DIPB) (Protein Mc7)                                                                                             | Trim44 (Dipb)                      | 28  | 23   | 18 | 16 |
| Q68FD5 | Clathrin heavy chain 1                                                                                                                                          | Cltc                               | 944 | 884  | 88 | 78 |
| P33173 | Kinesin-like protein KIF1A (Axonal transporter of synaptic vesicles)                                                                                            | Kif1a (Atsv) (Kif1)                | 45  | 108  | 25 | 22 |
| Q99PG2 | Opioid growth factor receptor (OGFr) (Zeta-type opioid receptor)                                                                                                | Ogfr                               | 38  | 24   | 8  | 7  |
| P70195 | Proteasome subunit beta type-7 (EC 3.4.25.1) (Proteasome subunit Z) (Macropain chain Z) (Multicatalytic endopeptidase complex chain Z)                          | Psmb7 (Mmc14)                      | 39  | 40   | 8  | 7  |
| Q02053 | Ubiquitin-like modifier-activating enzyme 1 (Ubiquitin-activating enzyme E1) (Ubiquitin-like modifier-activating enzyme 1 X) (Ubiquitin-activating enzyme E1 X) | Uba1 (Sbx) (Ube1) (Ube1ax) (Ube1x) | 660 | 1086 | 63 | 55 |
| Q8VHE6 | Dynein heavy chain 5, axonemal (Axonemal beta dynein heavy chain 5) (Mdnah5) (Ciliary dynein heavy chain 5)                                                     | Dnah5 (Dnahc5)                     | 47  | 44   | 83 | 72 |
| Q11011 | Puromycin-sensitive aminopeptidase (PSA) (EC 3.4.11.-)                                                                                                          | Npepps (Psa)                       | 71  | 141  | 30 | 26 |
| Q9Z1Q9 | Valyl-tRNA synthetase (EC 6.1.1.9) (Valine--tRNA ligase) (ValRS) (Protein G7a)                                                                                  | Vars (Bat6) (G7a) (Vars2)          | 380 | 302  | 37 | 32 |
| Q9JJK8 | Serine/threonine-protein kinase ATR (EC 2.7.11.1) (Ataxia telangiectasia and Rad3-related protein)                                                              | Atr                                | 20  | 25   | 72 | 62 |
| Q63994 | Myeloid cell surface antigen CD33 (Sialic acid-binding Ig-like lectin 3) (Siglec-3) (CD antigen CD33)                                                           | Cd33 (Siglec3)                     | 34  | 34   | 7  | 6  |
| O54749 | Cytochrome P450 2J5 (EC 1.14.14.1) (CYP11J5) (Arachidonic acid epoxygenase)                                                                                     | Cyp2j5                             | 29  | 34   | 7  | 6  |
| Q9D868 | Peptidyl-prolyl cis-trans isomerase H (PPIase H) (Rotamase H) (EC 5.2.1.8)                                                                                      | Ppih                               | 55  | 31   | 7  | 6  |
| Q9CYF5 | Williams-Beuren syndrome chromosomal region 16 protein homolog                                                                                                  | Wbscr16                            | 38  | 28   | 7  | 6  |
| P35979 | 60S ribosomal protein L12                                                                                                                                       | Rpl12                              | 208 | 389  | 14 | 12 |

|        |                                                                                                                                                                                                                                                      |                              |     |     |    |    |
|--------|------------------------------------------------------------------------------------------------------------------------------------------------------------------------------------------------------------------------------------------------------|------------------------------|-----|-----|----|----|
| P11881 | Inositol 1,4,5-trisphosphate receptor type 1 (Type 1 inositol 1,4,5-trisphosphate receptor) (Type 1 InsP3 receptor) (IP3 receptor isoform 1) (InsP3R1) (Inositol 1,4,5-trisphosphate-binding protein P400) (Purkinje cell protein 1) (Protein PCD-6) | Itpr1 (Insp3r) (Pcd6) (Pcp1) | 37  | 42  | 48 | 41 |
| Q6ZWN5 | 40S ribosomal protein S9                                                                                                                                                                                                                             | Rps9                         | 459 | 248 | 47 | 40 |
| Q91VW5 | Golgin subfamily A member 4 (tGolgin-1)                                                                                                                                                                                                              | Golga4                       | 41  | 60  | 46 | 39 |
| Q9JM52 | Misshapen-like kinase 1 (EC 2.7.11.1) (Mitogen-activated protein kinase kinase kinase 6) (MAPK/ERK kinase kinase 6) (MEK kinase kinase 6) (MEKKK 6) (Misshapen/NIK-related kinase) (GCK family kinase MiNK)                                          | Mink1 (Map4k6) (Mink)        | 18  | 54  | 13 | 11 |
| Q9CQN1 | Heat shock protein 75 kDa, mitochondrial (HSP 75) (Tumor necrosis factor type 1 receptor-associated protein) (TRAP-1) (TNFR-associated protein 1)                                                                                                    | Trap1 (Hsp75)                | 197 | 335 | 13 | 11 |
| Q9R0L6 | Pericentriolar material 1 protein (PCM-1) (mPCM-1)                                                                                                                                                                                                   | Pcm1                         | 24  | 30  | 19 | 16 |
| P14131 | 40S ribosomal protein S16                                                                                                                                                                                                                            | Rps16                        | 160 | 126 | 19 | 16 |
| Q9ES17 | Interleukin-21 (IL-21)                                                                                                                                                                                                                               | Il21                         | 22  | 25  | 6  | 5  |
| Q99PP7 | E3 ubiquitin-protein ligase TRIM33 (EC 6.3.2.-) (Tripartite motif-containing protein 33) (Transcription intermediary factor 1-gamma) (TIF1-gamma) (Ectodermin homolog)                                                                               | Trim33 (Kiaa1113)            | 33  | 25  | 12 | 10 |
| P11983 | T-complex protein 1 subunit alpha B (TCP-1-alpha) (CCT-alpha) (Tailless complex polypeptide 1B) (TCP-1-B)                                                                                                                                            | Cct1 (Ccta) (Tcp1)           | 29  | 66  | 18 | 15 |
| Q64514 | Tripeptidyl-peptidase 2 (EC 3.4.14.10) (Tripeptidyl-peptidase II) (TPP-II) (Tripeptidyl aminopeptidase)                                                                                                                                              | Tpp2                         | 54  | 76  | 24 | 20 |
| P20357 | Microtubule-associated protein 2 (MAP-2)                                                                                                                                                                                                             | Map2 (Mtap2)                 | 50  | 22  | 30 | 25 |
| P11531 | Dystrophin                                                                                                                                                                                                                                           | Dmd                          | 25  | 16  | 66 | 55 |
| P09405 | Nucleolin (Protein C23)                                                                                                                                                                                                                              | Ncl (Nuc)                    | 775 | 872 | 78 | 65 |

|        |                                                                                                                                                                                        |                        |      |     |     |    |
|--------|----------------------------------------------------------------------------------------------------------------------------------------------------------------------------------------|------------------------|------|-----|-----|----|
| Q91XQ0 | Dynein heavy chain 8, axonemal (Axonemal beta dynein heavy chain 8) (Ciliary dynein heavy chain 8)                                                                                     | Dnahc8                 | 47   | 51  | 77  | 64 |
| P80316 | T-complex protein 1 subunit epsilon (TCP-1-epsilon) (CCT-epsilon)                                                                                                                      | Cct5 (Ccte) (Kiaa0098) | 239  | 102 | 17  | 14 |
| P62259 | 14-3-3 protein epsilon (14-3-3E)                                                                                                                                                       | Ywhae                  | 1202 | 998 | 116 | 95 |
| P14206 | 40S ribosomal protein SA (Laminin receptor 1) (p40) (34/67 kDa laminin receptor) (37 kDa oncofetal antigen) (OFA/iLRP)                                                                 | Rpsa (Lamr1) (P40-8)   | 131  | 112 | 11  | 9  |
| P42227 | Signal transducer and activator of transcription 3 (Acute-phase response factor)                                                                                                       | Stat3 (Aprf)           | 16   | 28  | 33  | 27 |
| Q569Z5 | Probable ATP-dependent RNA helicase DDX46 (EC 3.6.1.-) (DEAD box protein 46)                                                                                                           | Ddx46 (Kiaa0801)       | 25   | 17  | 21  | 17 |
| Q80ZW0 | Serine/threonine-protein kinase 35 (EC 2.7.11.1)                                                                                                                                       | Stk35                  | 14   | 50  | 21  | 17 |
| Q64512 | Tyrosine-protein phosphatase non-receptor type 13 (EC 3.1.3.48) (Protein tyrosine phosphatase PTP-BL) (Protein-tyrosine phosphatase RIP) (Protein tyrosine phosphatase DPZPTP) (PTP36) | Ptpn13 (Ptp14)         | 28   | 27  | 26  | 21 |
| P17182 | Alpha-enolase (EC 4.2.1.11) (2-phospho-D-glycerate hydro-lyase) (Non-neural enolase) (NNE) (Enolase 1)                                                                                 | Eno1 (Eno-1)           | 976  | 802 | 62  | 50 |
| P00342 | L-lactate dehydrogenase C chain (LDH-C) (EC 1.1.1.27) (LDH testis subunit) (LDH-X)                                                                                                     | Ldhc (Ldh-3) (Ldh3)    | 97   | 122 | 15  | 12 |
| Q9Z2U0 | Proteasome subunit alpha type-7 (EC 3.4.25.1) (Proteasome subunit RC6-1)                                                                                                               | PsmA7                  | 121  | 253 | 15  | 12 |
| P12970 | 60S ribosomal protein L7a (Surfeit locus protein 3)                                                                                                                                    | Rpl7a (Surf-3) (Surf3) | 111  | 31  | 15  | 12 |
| P62852 | 40S ribosomal protein S25                                                                                                                                                              | Rps25                  | 101  | 100 | 15  | 12 |
| Q99MD9 | Nuclear autoantigenic sperm protein (NASP)                                                                                                                                             | Nasp                   | 365  | 293 | 34  | 27 |

|        |                                                                                                                               |                                        |      |     |     |     |
|--------|-------------------------------------------------------------------------------------------------------------------------------|----------------------------------------|------|-----|-----|-----|
| Q91ZU6 | Bullous pemphigoid antigen 1, isoforms 1/2/3/4 (BPA) (Hemidesmosomal plaque protein) (Dystonia musculorum protein) (Dystonin) | Dst (Bpag1)                            | 78   | 38  | 126 | 100 |
| Q80T14 | Extracellular matrix protein FRAS1                                                                                            | Fras1 (Kiaa1500)                       | 48   | 109 | 24  | 19  |
| Q8C196 | Carbamoyl-phosphate synthase [ammonia], mitochondrial (EC 6.3.4.16) (Carbamoyl-phosphate synthetase I) (CPSase I)             | Cps1                                   | 22   | 25  | 19  | 15  |
| Q8CIQ7 | Dedicator of cytokinesis protein 3 (Modifier of cell adhesion) (Presenilin-binding protein) (PBP)                             | Dock3 (Moca)                           | 80   | 56  | 33  | 26  |
| P63325 | 40S ribosomal protein S10                                                                                                     | Rps10                                  | 468  | 168 | 42  | 33  |
| Q9JHU4 | Cytoplasmic dynein 1 heavy chain 1 (Cytoplasmic dynein heavy chain 1) (Dynein heavy chain, cytosolic)                         | Dync1h1 (Dhc1) (Dnch1) (Dnchc1) (Dyhc) | 822  | 395 | 157 | 123 |
| Q6A078 | Centrosomal protein of 290 kDa (Cep290) (Nephrocystin-6)                                                                      | Cep290 (Kiaa0373) (Nphp6)              | 32   | 57  | 85  | 66  |
| Q8VHK5 | Membrane protein MLC1                                                                                                         | Mlc1                                   | 35   | 25  | 22  | 17  |
| P31254 | Ubiquitin-like modifier-activating enzyme 1 Y (Ubiquitin-activating enzyme E1 Y) (Ubiquitin-activating enzyme E1)             | Ube1ay (Sby) (Ube1y) (Ube1y1)          | 161  | 77  | 22  | 17  |
| P06151 | L-lactate dehydrogenase A chain (LDH-A) (EC 1.1.1.27) (LDH muscle subunit) (LDH-M)                                            | Ldha (Ldh-1) (Ldh1)                    | 1033 | 421 | 74  | 57  |
| Q9CZW4 | Long-chain-fatty-acid--CoA ligase 3 (EC 6.2.1.3) (Long-chain acyl-CoA synthetase 3) (LACS 3)                                  | Acsl3 (Acs3) (FacI3)                   | 41   | 37  | 13  | 10  |
| P62748 | Hippocalcin-like protein 1 (Visinin-like protein 3) (VILIP-3) (Neural visinin-like protein 3) (NVL-3) (NVP-3)                 | Hpcal1                                 | 59   | 97  | 13  | 10  |
| Q7TMK6 | Protein Hook homolog 2                                                                                                        | Hook2                                  | 33   | 36  | 26  | 20  |
| P62702 | 40S ribosomal protein S4, X isoform                                                                                           | Rps4x (Rps4)                           | 402  | 304 | 30  | 23  |



|        |                                                                                                                                                                                                                                        |                                 |     |     |    |    |
|--------|----------------------------------------------------------------------------------------------------------------------------------------------------------------------------------------------------------------------------------------|---------------------------------|-----|-----|----|----|
| Q8JZQ2 | AFG3-like protein 2 (EC 3.4.24.-)                                                                                                                                                                                                      | Afg3l2                          | 15  | 27  | 17 | 13 |
| P47856 | Glucosamine--fructose-6-phosphate aminotransferase [isomerizing] 1 (EC 2.6.1.16) (Glutamine:fructose 6 phosphate amidotransferase 1) (GFAT 1) (GFAT1) (D-fructose-6-phosphate amidotransferase 1) (Hexosephosphate aminotransferase 1) | Gfpt1 (Gfpt)                    | 17  | 29  | 17 | 13 |
| Q8BHS8 | Syntabulin (Syntaxin-1-binding protein) (Golgi-localized syntaphilin-related protein) (m-Golsyn)                                                                                                                                       | Sybu (Golsyn) (Kiaa1472)        | 32  | 19  | 17 | 13 |
| Q569Z6 | Thyroid hormone receptor-associated protein 3 (Thyroid hormone receptor-associated protein complex 150 kDa component) (Trap150)                                                                                                        | Thrap3 (Trap150)                | 29  | 48  | 21 | 16 |
| P39447 | Tight junction protein ZO-1 (Zonula occludens protein 1) (Zona occludens protein 1) (Tight junction protein 1)                                                                                                                         | Tjp1 (Zo1)                      | 36  | 15  | 21 | 16 |
| Q99MY8 | Probable histone-lysine N-methyltransferase ASH1L (EC 2.1.1.43) (Absent small and homeotic disks protein 1 homolog) (ASH1-like protein)                                                                                                | Ash1l                           | 19  | 31  | 46 | 35 |
| P97434 | Myosin phosphatase Rho-interacting protein (Rho-interacting protein 3) (RIP3) (p116Rip)                                                                                                                                                | Mrip (Kiaa0864) (Mrip) (Rhoip3) | 35  | 23  | 25 | 19 |
| P70670 | Nascent polypeptide-associated complex subunit alpha, muscle-specific form (Alpha-NAC, muscle-specific form)                                                                                                                           | Naca (Gm1878)                   | 22  | 130 | 29 | 22 |
| P16627 | Heat shock 70 kDa protein 1L (Heat shock 70 kDa protein 1-like) (Heat shock 70 kDa-like protein 1) (Spermatid-specific heat shock protein 70)                                                                                          | Hspa1l (Hsc70t)                 | 319 | 238 | 33 | 25 |
| P58043 | Sestrin-2                                                                                                                                                                                                                              | Sesn2 (Sest2)                   | 21  | 34  | 4  | 3  |
| Q02956 | Protein kinase C zeta type (EC 2.7.11.13) (nPKC-zeta)                                                                                                                                                                                  | Prkcz (PkcZ)                    | 29  | 15  | 8  | 6  |

|        |                                                                                                                                      |                                                   |      |      |     |     |
|--------|--------------------------------------------------------------------------------------------------------------------------------------|---------------------------------------------------|------|------|-----|-----|
| Q9DBG5 | Mannose-6-phosphate receptor-binding protein 1 (Cargo selection protein TIP47)                                                       | M6prbp1 (Tip47)                                   | 25   | 22   | 8   | 6   |
| P62751 | 60S ribosomal protein L23a                                                                                                           | Rpl23a                                            | 75   | 49   | 16  | 12  |
| O54887 | Testis-specific serine kinase substrate (Testis-specific kinase substrate) (STK22 substrate 1)                                       | Stk22s1 (Tsks)                                    | 50   | 21   | 16  | 12  |
| Q8K1F9 | Lactase-like protein (Klotho/lactase-phlorizin hydrolase-related protein)                                                            | Lctl (Klph)                                       | 27   | 21   | 24  | 18  |
| Q8R5F3 | Uncharacterized protein C6orf130 homolog                                                                                             |                                                   | 64   | 29   | 31  | 23  |
| P60710 | Actin, cytoplasmic 1 (Beta-actin)                                                                                                    | Actb                                              | 5140 | 4496 | 282 | 208 |
| P62264 | 40S ribosomal protein S14                                                                                                            | Rps14                                             | 163  | 166  | 15  | 11  |
| P25444 | 40S ribosomal protein S2 (S4) (LLRep3 protein)                                                                                       | Rps2 (Llrep3) (Rps4)                              | 217  | 50   | 26  | 19  |
| Q61656 | Probable ATP-dependent RNA helicase DDX5 (EC 3.6.1.-) (DEAD box protein 5) (RNA helicase p68) (DEAD box RNA helicase DEAD1) (mDEAD1) | Ddx5 (Tnz2)                                       | 90   | 43   | 11  | 8   |
| Q91Z67 | SLIT-ROBO Rho GTPase-activating protein 2 (srGAP2) (Formin-binding protein 2) (Formin-binding protein 27) (FBP-27)                   | Srgap2 (Fbp27) (Fnbp2)                            | 77   | 48   | 11  | 8   |
| P62991 | Ubiquitin                                                                                                                            | Rps27a (Uba80) (Ubcep1); Uba52 (Ubcep2); Ubb; Ubc | 61   | 54   | 11  | 8   |
| Q61696 | Heat shock 70 kDa protein 1A (Heat shock 70 kDa protein 3) (HSP70.3) (Hsp68)                                                         | Hspa1a (Hsp70-3) (Hsp70A1)                        | 266  | 236  | 33  | 24  |
| Q9CQ65 | S-methyl-5'-thioadenosine phosphorylase (EC 2.4.2.28) (5'-methylthioadenosine phosphorylase) (MTA phosphorylase) (MTAPase)           | Mtap                                              | 48   | 36   | 7   | 5   |
| Q60673 | Receptor-type tyrosine-protein phosphatase-like N (R-PTP-N) (PTP IA-2)                                                               | Ptpn (Ptp35)                                      | 30   | 18   | 14  | 10  |
| P14869 | 60S acidic ribosomal protein P0 (L10E)                                                                                               | Rplp0 (Arbp)                                      | 115  | 334  | 28  | 20  |

|        |                                                                                                                                                                                                                               |                       |      |     |    |    |
|--------|-------------------------------------------------------------------------------------------------------------------------------------------------------------------------------------------------------------------------------|-----------------------|------|-----|----|----|
| Q920E5 | Farnesyl pyrophosphate synthetase (FPP synthetase) (FPS) (Farnesyl diphosphate synthetase) (Cholesterol-regulated 39 kDa protein) (CR 39) [Includes: Dimethylallyltransferase (EC 2.5.1.1); Geranyltransferase (EC 2.5.1.10)] | Fdps                  | 107  | 43  | 17 | 12 |
| Q60692 | Proteasome subunit beta type-6 (EC 3.4.25.1) (Proteasome delta chain) (Macropain delta chain) (Multicatalytic endopeptidase complex delta chain) (Proteasome subunit Y)                                                       | Psmb6 (Lmp19)         | 33   | 89  | 17 | 12 |
| P51410 | 60S ribosomal protein L9                                                                                                                                                                                                      | Rpl9                  | 187  | 212 | 17 | 12 |
| Q8BMJ2 | Leucyl-tRNA synthetase, cytoplasmic (EC 6.1.1.4) (Leucine--tRNA ligase) (LeuRS)                                                                                                                                               | Lars                  | 52   | 45  | 47 | 33 |
| P61294 | Ras-related protein Rab-6B                                                                                                                                                                                                    | Rab6b (D9Bwg0185e)    | 18   | 53  | 10 | 7  |
| Q52KI8 | Serine/arginine repetitive matrix protein 1 (Plenty-of-prolines 101)                                                                                                                                                          | Srrm1 (Pop101)        | 22   | 73  | 29 | 20 |
| P99024 | Tubulin beta-5 chain                                                                                                                                                                                                          | Tubb5                 | 1377 | 976 | 88 | 60 |
| Q6PHN9 | Ras-related protein Rab-35                                                                                                                                                                                                    | Rab35                 | 17   | 59  | 3  | 2  |
| Q8C9S8 | Cysteine protease ATG4A (EC 3.4.22.-) (Autophagy-related protein 4 homolog A) (Autophagin-2) (Autophagy-related cysteine endopeptidase 2) (AUT-like 2 cysteine endopeptidase)                                                 | Atg4a (Apg4a) (Autl2) | 26   | 21  | 6  | 4  |
| P29391 | Ferritin light chain 1 (Ferritin L subunit 1)                                                                                                                                                                                 | Ftl1 (Ftl) (Ftl-1)    | 150  | 159 | 6  | 4  |
| Q99LD8 | N(G),N(G)-dimethylarginine dimethylaminohydrolase 2 (Dimethylarginine dimethylaminohydrolase 2) (DDAH-2) (EC 3.5.3.18) (DDAHII) (Dimethylargininase-2)                                                                        | Ddah2                 | 103  | 92  | 9  | 6  |
| P43275 | Histone H1.1 (H1 VAR.3) (H1a)                                                                                                                                                                                                 | Hist1h1a (H1f1)       | 28   | 90  | 9  | 6  |

|        |                                                                                                                                                                                                                                                                                                        |                                |      |      |     |     |
|--------|--------------------------------------------------------------------------------------------------------------------------------------------------------------------------------------------------------------------------------------------------------------------------------------------------------|--------------------------------|------|------|-----|-----|
| Q62168 | Keratin, type I cuticular Ha2 (Hair keratin, type I Ha2) (Keratin-32) (K32)                                                                                                                                                                                                                            | Krt32 (Hka2) (Krt1-2) (Krtha2) | 39   | 36   | 9   | 6   |
| P61979 | Heterogeneous nuclear ribonucleoprotein K (hnRNP K)                                                                                                                                                                                                                                                    | Hnrnpk (Hnrpk)                 | 225  | 46   | 18  | 12  |
| Q8K4L3 | Supervillin (Archvillin) (p205/p250)                                                                                                                                                                                                                                                                   | Svil                           | 25   | 22   | 18  | 12  |
| P68033 | Actin, alpha cardiac muscle 1 (Alpha-cardiac actin)                                                                                                                                                                                                                                                    | Actc1 (Actc)                   | 3948 | 2726 | 234 | 155 |
| P68372 | Tubulin beta-2C chain                                                                                                                                                                                                                                                                                  | Tubb2c                         | 1300 | 891  | 78  | 51  |
| P42932 | T-complex protein 1 subunit theta (TCP-1-theta) (CCT-theta)                                                                                                                                                                                                                                            | Cct8 (Cctq)                    | 197  | 57   | 23  | 15  |
| Q924W6 | Tripartite motif-containing protein 66 (Transcriptional intermediary factor 1 delta)                                                                                                                                                                                                                   | Trim66 (Tif1d)                 | 28   | 18   | 23  | 15  |
| O70435 | Proteasome subunit alpha type-3 (EC 3.4.25.1) (Proteasome component C8) (Macropain subunit C8) (Multicatalytic endopeptidase complex subunit C8) (Proteasome subunit K)                                                                                                                                | Psma3                          | 95   | 76   | 14  | 9   |
| P61161 | Actin-related protein 2 (Actin-like protein 2)                                                                                                                                                                                                                                                         | Actr2 (Arp2)                   | 247  | 124  | 28  | 18  |
| Q8CG48 | Structural maintenance of chromosomes protein 2 (Chromosome-associated protein E) (XCAP-E homolog) (FGF-inducible protein 16)                                                                                                                                                                          | Smc2 (Cape) (Fin16) (Smc2l1)   | 32   | 36   | 41  | 26  |
| Q7TMM9 | Tubulin beta-2A chain                                                                                                                                                                                                                                                                                  | Tubb2a (Tubb2)                 | 1422 | 775  | 83  | 52  |
| Q61983 | Sodium-dependent phosphate transport protein 1 (Sodium/phosphate cotransporter 1) (Na(+)/Pi cotransporter 1) (Solute carrier family 17 member 1) (Renal sodium-dependent phosphate transport protein 1) (Renal sodium-phosphate transport protein 1) (Renal Na(+)-dependent phosphate cotransporter 1) | Slc17a1 (Npt1)                 | 31   | 33   | 8   | 5   |
| Q9QZ09 | Putative homeodomain transcription factor 1                                                                                                                                                                                                                                                            | Phtf1 (Phtf)                   | 29   | 24   | 8   | 5   |

|        |                                                                                                                                                                                                                          |                                    |     |     |    |    |
|--------|--------------------------------------------------------------------------------------------------------------------------------------------------------------------------------------------------------------------------|------------------------------------|-----|-----|----|----|
| Q8C7H1 | Methylmalonic aciduria type A homolog, mitochondrial                                                                                                                                                                     | Mmaa                               | 31  | 37  | 16 | 10 |
| Q80U87 | Ubiquitin carboxyl-terminal hydrolase 8 (EC 3.1.2.15) (Ubiquitin thioesterase 8) (Ubiquitin-specific-processing protease 8) (Deubiquitinating enzyme 8) (mUBPy)                                                          | Usp8 (Kiaa0055) (Ubpy)             | 29  | 23  | 24 | 15 |
| P16125 | L-lactate dehydrogenase B chain (LDH-B) (EC 1.1.1.27) (LDH heart subunit) (LDH-H)                                                                                                                                        | Ldhb (Ldh-2) (Ldh2)                | 315 | 214 | 34 | 21 |
| P17156 | Heat shock-related 70 kDa protein 2 (Heat shock protein 70.2)                                                                                                                                                            | Hspa2 (Hcp70.2) (Hsp70-2)          | 964 | 544 | 60 | 37 |
| Q3UXZ6 | Protein FAM81A                                                                                                                                                                                                           | Fam81a                             | 22  | 27  | 13 | 8  |
| O35551 | Rab GTPase-binding effector protein 1 (Rabaptin-5) (Rabaptin-5alpha)                                                                                                                                                     | Rabep1 (Rab5ep) (Rabpt5) (Rabpt5a) | 33  | 26  | 26 | 16 |
| Q61879 | Myosin-10 (Myosin heavy chain 10) (Myosin heavy chain, non-muscle IIb) (Non-muscle myosin heavy chain IIb) (NMMHC II-b) (NMMHC-IIb) (Cellular myosin heavy chain, type B) (Non-muscle myosin heavy chain-B) (NMMHC-B)    | Myh10                              | 122 | 101 | 65 | 40 |
| O08709 | Peroxiredoxin-6 (EC 1.11.1.15) (Antioxidant protein 2) (1-Cys peroxiredoxin) (1-Cys PRX) (Acidic calcium-independent phospholipase A2) (aiPLA2) (EC 3.1.1.-) (Non-selenium glutathione peroxidase) (NSGPx) (EC 1.11.1.7) | Prdx6 (Aop2) (Ltw4) (Prdx5)        | 56  | 29  | 5  | 3  |
| O88291 | Zinc finger protein 326 (Zinc finger protein-associated with nuclear matrix of 75 kDa)                                                                                                                                   | Znf326 (Zan75) (Zfp326)            | 41  | 55  | 5  | 3  |
| Q9D1R9 | 60S ribosomal protein L34                                                                                                                                                                                                | Rpl34                              | 34  | 32  | 10 | 6  |
| Q9Z0P5 | Twinfilin-2 (Twinfilin-1-like protein) (A6-related protein) (mA6RP)                                                                                                                                                      | Twf2 (Ptk9l)                       | 29  | 32  | 10 | 6  |

|        |                                                                                                                                                                          |                           |      |     |     |    |
|--------|--------------------------------------------------------------------------------------------------------------------------------------------------------------------------|---------------------------|------|-----|-----|----|
| Q6NZJ6 | Eukaryotic translation initiation factor 4 gamma 1 (eIF-4-gamma 1) (eIF-4G 1) (eIF-4G1)                                                                                  | Eif4g1                    | 47   | 113 | 30  | 18 |
| P26040 | Ezrin (p81) (Cytovillin) (Villin-2)                                                                                                                                      | Ezr (Vil2)                | 127  | 106 | 27  | 16 |
| P63038 | 60 kDa heat shock protein, mitochondrial (Heat shock protein 60) (HSP-60) (Hsp60) (60 kDa chaperonin) (Chaperonin 60) (CPN60) (Mitochondrial matrix protein P1) (HSP-65) | Hspd1 (Hsp60)             | 15   | 32  | 22  | 13 |
| P09041 | Phosphoglycerate kinase 2 (EC 2.7.2.3) (Phosphoglycerate kinase, testis specific)                                                                                        | Pgk2 (Pkg-2)              | 162  | 73  | 17  | 10 |
| P63017 | Heat shock cognate 71 kDa protein (Heat shock 70 kDa protein 8)                                                                                                          | Hspa8 (Hsc70) (Hsc73)     | 1719 | 959 | 119 | 70 |
| P05532 | Mast/stem cell growth factor receptor (SCFR) (EC 2.7.10.1) (Proto-oncogene tyrosine-protein kinase Kit) (c-kit) (CD antigen CD117)                                       | Kit (SI)                  | 16   | 35  | 12  | 7  |
| P62900 | 60S ribosomal protein L31                                                                                                                                                | Rpl31                     | 124  | 62  | 12  | 7  |
| Q9JI78 | Peptide-N(4)-(N-acetyl-beta-glucosaminyl)asparagine amidase (PNGase) (mPNGase) (EC 3.5.1.52) (Peptide:N-glycanase) (N-glycanase 1)                                       | Ngly1                     | 29   | 32  | 19  | 11 |
| P47963 | 60S ribosomal protein L13 (A52)                                                                                                                                          | Rpl13                     | 744  | 379 | 47  | 27 |
| P53762 | Aryl hydrocarbon receptor nuclear translocator (ARNT protein) (Dioxin receptor, nuclear translocator) (Hypoxia-inducible factor 1 beta) (HIF-1 beta)                     | Arnt                      | 25   | 22  | 7   | 4  |
| Q9QUK4 | Baculoviral IAP repeat-containing protein 1b (Neuronal apoptosis inhibitory protein 2)                                                                                   | Naip2 (Birc1b) (Naip-rs6) | 21   | 28  | 14  | 8  |
| Q8K2A7 | Integrator complex subunit 10 (Int10)                                                                                                                                    | Ints10                    | 32   | 47  | 21  | 12 |
| P26043 | Radixin (ESP10)                                                                                                                                                          | Rdx                       | 127  | 106 | 23  | 13 |

|        |                                                                                                                                                                                                                                     |                             |     |     |    |    |
|--------|-------------------------------------------------------------------------------------------------------------------------------------------------------------------------------------------------------------------------------------|-----------------------------|-----|-----|----|----|
| P49722 | Proteasome subunit alpha type-2 (EC 3.4.25.1) (Proteasome component C3) (Macropain subunit C3) (Multicatalytic endopeptidase complex subunit C3)                                                                                    | Psma2 (Lmpc3)               | 188 | 103 | 16 | 9  |
| Q9R1X4 | Protein timeless homolog (mTim)                                                                                                                                                                                                     | Timeless (Tim1) (Timeless1) | 22  | 25  | 16 | 9  |
| Q9Z1Q5 | Chloride intracellular channel protein 1 (Nuclear chloride ion channel 27) (NCC27)                                                                                                                                                  | Clic1                       | 137 | 139 | 9  | 5  |
| P63073 | Eukaryotic translation initiation factor 4E (eIF-4E) (eIF4E) (mRNA cap-binding protein) (eIF-4F 25 kDa subunit)                                                                                                                     | Eif4e                       | 110 | 25  | 9  | 5  |
| Q64105 | Sepiapterin reductase (SPR) (EC 1.1.1.153)                                                                                                                                                                                          | Spr                         | 43  | 27  | 9  | 5  |
| Q8BYH8 | Chromodomain-helicase-DNA-binding protein 9 (CHD-9) (EC 3.6.1.-) (ATP-dependent helicase CHD9) (Peroxisomal proliferator-activated receptor A-interacting complex 320 kDa protein) (PPAR-alpha-interacting complex protein 320 kDa) | Chd9 (Kiaa0308) (Pric320)   | 39  | 27  | 49 | 27 |
| P17918 | Proliferating cell nuclear antigen (PCNA) (Cyclin)                                                                                                                                                                                  | Pcna                        | 273 | 207 | 20 | 11 |
| O35664 | Interferon-alpha/beta receptor beta chain (Interferon alpha/beta receptor 2) (IFN-alpha-REC) (Type I interferon receptor) (IFN-R)                                                                                                   | Ifnar2                      | 37  | 21  | 11 | 6  |
| Q9D6F9 | Tubulin beta-4 chain                                                                                                                                                                                                                | Tubb4                       | 888 | 493 | 58 | 31 |
| O88844 | Isocitrate dehydrogenase [NADP] cytoplasmic (IDH) (EC 1.1.1.42) (Cytosolic NADP-isocitrate dehydrogenase) (Oxalosuccinate decarboxylase) (NADP(+)-specific ICDH) (IDP)                                                              | Idh1                        | 155 | 163 | 15 | 8  |
| Q61390 | T-complex protein 1 subunit zeta-2 (TCP-1-zeta-2) (CCT-zeta-2) (Cctz-2)                                                                                                                                                             | Cct6b                       | 55  | 52  | 15 | 8  |
| Q922F4 | Tubulin beta-6 chain                                                                                                                                                                                                                | Tubb6                       | 583 | 382 | 40 | 21 |
| P97351 | 40S ribosomal protein S3a                                                                                                                                                                                                           | Rps3a                       | 899 | 392 | 50 | 26 |
| Q9ERD7 | Tubulin beta-3 chain                                                                                                                                                                                                                | Tubb3                       | 780 | 383 | 52 | 27 |

|               |                                                                                                                       |                                                                                                                                                        |                             |      |     |    |    |
|---------------|-----------------------------------------------------------------------------------------------------------------------|--------------------------------------------------------------------------------------------------------------------------------------------------------|-----------------------------|------|-----|----|----|
|               | Q80UE6                                                                                                                | Serine/threonine-protein kinase WNK4 (EC 2.7.11.1) (Protein kinase with no lysine 4) (Protein kinase, lysine-deficient 4)                              | Wnk4 (Prkwnk4)              | 23   | 33  | 29 | 15 |
|               | P10649                                                                                                                | Glutathione S-transferase Mu 1 (EC 2.5.1.18) (GST class-mu 1) (Glutathione S-transferase GT8.7) (pmGT10) (GST 1-1)                                     | Gstm1                       | 1081 | 522 | 61 | 31 |
| Gametogenesis | Q8BGQ1                                                                                                                | Uncharacterized protein C14orf133 homolog                                                                                                              |                             | 23   | 28  | 5  | 9  |
|               | Q8BFQ9                                                                                                                | Kelch domain-containing protein 5                                                                                                                      | Klhdc5 (Kiaa1340)           | 30   | 22  | 10 | 17 |
|               | Q3UDW8                                                                                                                | Heparan-alpha-glucosaminide N-acetyltransferase (EC 2.3.1.78) (Transmembrane protein 76)                                                               | Hgsnat (D8Ert354e) (Tmem76) | 34   | 22  | 6  | 9  |
|               | P70168                                                                                                                | Importin subunit beta-1 (Karyopherin subunit beta-1) (Nuclear factor P97) (Pore targeting complex 97 kDa subunit) (PTAC97) (SCG)                       | Kpnb1 (Impnb)               | 48   | 17  | 13 | 17 |
|               | Q8BGD9                                                                                                                | Eukaryotic translation initiation factor 4B (eIF-4B)                                                                                                   | Eif4b                       | 238  | 306 | 13 | 16 |
|               | P51880                                                                                                                | Fatty acid-binding protein, brain (B-FABP) (Fatty acid-binding protein 7) (Brain lipid-binding protein) (BLBP)                                         | Fabp7 (Blbp)                | 933  | 856 | 31 | 38 |
|               | P80315                                                                                                                | T-complex protein 1 subunit delta (TCP-1-delta) (CCT-delta) (A45)                                                                                      | Cct4 (Cctd)                 | 61   | 59  | 15 | 18 |
|               | Q9R0K7                                                                                                                | Plasma membrane calcium-transporting ATPase 2 (PMCA2) (EC 3.6.3.8) (Plasma membrane calcium ATPase isoform 2) (Plasma membrane calcium pump isoform 2) | Atp2b2 (Pmca2)              | 32   | 27  | 70 | 83 |
|               | P80313                                                                                                                | T-complex protein 1 subunit eta (TCP-1-eta) (CCT-eta)                                                                                                  | Cct7 (Ccth)                 | 49   | 50  | 11 | 13 |
|               | Q5SPW0                                                                                                                | Vacuolar protein sorting-associated protein 54 (Tumor antigen SLP-8p homolog)                                                                          | Vps54                       | 36   | 28  | 13 | 15 |
| P41230        | Histone demethylase JARID1C (EC 1.14.11.-) (Jumonji/ARID domain-containing protein 1C) (Protein SmcX) (Protein Xe169) | Jarid1c (Kiaa0234) (Smcx) (Xe169)                                                                                                                      | 34                          | 32   | 26  | 29 |    |



|        |                                                                                                                                                                                                                     |                          |     |     |     |     |
|--------|---------------------------------------------------------------------------------------------------------------------------------------------------------------------------------------------------------------------|--------------------------|-----|-----|-----|-----|
| P11984 | T-complex protein 1 subunit alpha A (TCP-1-alpha) (CCT-alpha) (Tailless complex polypeptide 1A) (TCP-1-A)                                                                                                           | Cct1 (Ccta) (Tcp1)       | 29  | 66  | 14  | 15  |
| Q8VI56 | Low-density lipoprotein receptor-related protein 4 (LDLR dan)                                                                                                                                                       | Lrp4 (Kiaa0816)          | 77  | 30  | 19  | 20  |
| P62141 | Serine/threonine-protein phosphatase PP1-beta catalytic subunit (PP-1B) (EC 3.1.3.16)                                                                                                                               | Ppp1cb                   | 177 | 57  | 4   | 4   |
| Q8R4K2 | Interleukin-1 receptor-associated kinase 4 (IRAK-4) (EC 2.7.11.1)                                                                                                                                                   | Irak4                    | 32  | 47  | 22  | 22  |
| P03966 | N-myc proto-oncogene protein                                                                                                                                                                                        | Mycn (Nmyc) (Nmyc1)      | 65  | 46  | 18  | 17  |
| Q7TMY8 | E3 ubiquitin-protein ligase HUWE1 (EC 6.3.2.-) (HECT, UBA and WWE domain-containing protein 1) (Upstream regulatory element-binding protein 1) (URE-binding protein 1) (URE-B1) (E3Histone)                         | Huwe1 (Kiaa0312) (Ureb1) | 33  | 91  | 39  | 36  |
| Q8VDD5 | Myosin-9 (Myosin heavy chain 9) (Myosin heavy chain, non-muscle IIa) (Non-muscle myosin heavy chain IIa) (NMMHC II-a) (NMMHC-IIA) (Cellular myosin heavy chain, type A) (Non-muscle myosin heavy chain-A) (NMMHC-A) | Myh9                     | 780 | 839 | 127 | 115 |
| Q8VHE6 | Dynein heavy chain 5, axonemal (Axonemal beta dynein heavy chain 5) (Mdnah5) (Ciliary dynein heavy chain 5)                                                                                                         | Dnah5 (Dnahc5)           | 47  | 44  | 83  | 72  |
| Q63994 | Myeloid cell surface antigen CD33 (Sialic acid-binding Ig-like lectin 3) (Siglec-3) (CD antigen CD33)                                                                                                               | Cd33 (Siglec3)           | 34  | 34  | 7   | 6   |
| P11983 | T-complex protein 1 subunit alpha B (TCP-1-alpha) (CCT-alpha) (Tailless complex polypeptide 1B) (TCP-1-B)                                                                                                           | Cct1 (Ccta) (Tcp1)       | 29  | 66  | 18  | 15  |
| P80316 | T-complex protein 1 subunit epsilon (TCP-1-epsilon) (CCT-epsilon)                                                                                                                                                   | Cct5 (Ccte) (Kiaa0098)   | 239 | 102 | 17  | 14  |

|                  |        |                                                                                                                                            |                                        |      |     |     |     |
|------------------|--------|--------------------------------------------------------------------------------------------------------------------------------------------|----------------------------------------|------|-----|-----|-----|
|                  | Q9JHU4 | Cytoplasmic dynein 1 heavy chain 1 (Cytoplasmic dynein heavy chain 1) (Dynein heavy chain, cytosolic)                                      | Dync1h1 (Dhc1) (Dnch1) (Dnchc1) (Dyhc) | 822  | 395 | 157 | 123 |
|                  | Q9QYB1 | Chloride intracellular channel protein 4 (mc3s5/mtCLIC)                                                                                    | Clic4                                  | 28   | 33  | 4   | 3   |
|                  | P14148 | 60S ribosomal protein L7                                                                                                                   | Rpl7                                   | 145  | 52  | 14  | 10  |
|                  | P99024 | Tubulin beta-5 chain                                                                                                                       | Tubb5                                  | 1377 | 976 | 88  | 60  |
|                  | Q80TP3 | E3 ubiquitin-protein ligase UBR5 (EC 6.3.2.-) (E3 ubiquitin-protein ligase, HECT domain-containing 1) (Hyperplastic discs protein homolog) | Ubr5 (Edd) (Edd1) (Kiaa0896)           | 27   | 17  | 43  | 29  |
|                  | P42932 | T-complex protein 1 subunit theta (TCP-1-theta) (CCT-theta)                                                                                | Cct8 (Cctq)                            | 197  | 57  | 23  | 15  |
|                  | P40142 | Transketolase (TK) (EC 2.2.1.1) (P68)                                                                                                      | Tkt                                    | 562  | 250 | 117 | 75  |
|                  | Q8BGR5 | Protein FAM53B                                                                                                                             | Fam53b                                 | 47   | 41  | 19  | 12  |
|                  | Q6NZJ6 | Eukaryotic translation initiation factor 4 gamma 1 (eIF-4-gamma 1) (eIF-4G 1) (eIF-4G1)                                                    | Eif4g1                                 | 47   | 113 | 30  | 18  |
|                  | P80317 | T-complex protein 1 subunit zeta (TCP-1-zeta) (CCT-zeta) (CCT-zeta-1)                                                                      | Cct6a (Cct6) (Cctz) (Cctz1)            | 160  | 52  | 22  | 13  |
|                  | P63017 | Heat shock cognate 71 kDa protein (Heat shock 70 kDa protein 8)                                                                            | Hspa8 (Hsc70) (Hsc73)                  | 1719 | 959 | 119 | 70  |
|                  | Q61390 | T-complex protein 1 subunit zeta-2 (TCP-1-zeta-2) (CCT-zeta-2) (Cctz-2)                                                                    | Cct6b                                  | 55   | 52  | 15  | 8   |
| Other metabolism | Q9CXW3 | Calcyclin-binding protein (CacyBP) (Siah-interacting protein)                                                                              | Cacybp (Sip)                           | 57   | 39  | 7   | 13  |
|                  | P06745 | Glucose-6-phosphate isomerase (GPI) (EC 5.3.1.9) (Phosphoglucose isomerase) (PGI) (Phosphohexose isomerase) (PHI) (Neuroleukin) (NLK)      | Gpi (Gpi1)                             | 39   | 107 | 12  | 22  |
|                  | P56716 | Oxygen-regulated protein 1 (Retinitis pigmentosa RP1 protein homolog)                                                                      | Rp1 (Orp1) (Rp1h)                      | 31   | 49  | 58  | 104 |

|        |                                                                                                                                                                                                       |                                                                                                                                                                                  |     |      |    |    |
|--------|-------------------------------------------------------------------------------------------------------------------------------------------------------------------------------------------------------|----------------------------------------------------------------------------------------------------------------------------------------------------------------------------------|-----|------|----|----|
| Q8K2P1 | Uncharacterized protein C9orf150 homolog                                                                                                                                                              | D4Bwg0951e                                                                                                                                                                       | 21  | 32   | 51 | 91 |
| Q64674 | Spermidine synthase (SPDSY) (EC 2.5.1.16)<br>(Putrescine aminopropyltransferase)                                                                                                                      | Srm                                                                                                                                                                              | 55  | 29   | 4  | 7  |
| O35381 | Acidic leucine-rich nuclear phosphoprotein 32 family member A (Potent heat-stable protein phosphatase 2A inhibitor I1PP2A) (Acidic nuclear phosphoprotein pp32) (Leucine-rich acidic nuclear protein) | Anp32a<br>(Anp32)<br>(Lanp)                                                                                                                                                      | 36  | 112  | 8  | 14 |
| Q9R117 | Non-receptor tyrosine-protein kinase TYK2 (EC 2.7.10.2)                                                                                                                                               | Tyk2                                                                                                                                                                             | 27  | 30   | 15 | 26 |
| Q8R1S0 | Ubiquinone biosynthesis monooxygenase COQ6 (EC 1.14.13.-)                                                                                                                                             | Coq6                                                                                                                                                                             | 42  | 92   | 10 | 17 |
| Q8BFQ9 | Kelch domain-containing protein 5                                                                                                                                                                     | Klhdc5<br>(Kiaa1340)                                                                                                                                                             | 30  | 22   | 10 | 17 |
| Q9ERK4 | Exportin-2 (Exp2) (Importin-alpha re-exporter) (Chromosome segregation 1-like protein)                                                                                                                | Cse1l (Xpo2)                                                                                                                                                                     | 42  | 153  | 26 | 44 |
| Q8CGP2 | Histone H2B type 1-P                                                                                                                                                                                  | Hist1h2bp                                                                                                                                                                        | 436 | 999  | 46 | 77 |
| P35980 | 60S ribosomal protein L18                                                                                                                                                                             | Rpl18                                                                                                                                                                            | 32  | 22   | 51 | 85 |
| P62806 | Histone H4                                                                                                                                                                                            | Hist1h4a;<br>Hist1h4b (H4-53);<br>Hist1h4c (H4-12);<br>Hist1h4d;<br>Hist1h4f;<br>Hist1h4h;<br>Hist1h4i;<br>Hist1h4j;<br>Hist1h4k;<br>Hist1h4m;<br>Hist2h4a (Hist2h4);<br>Hist4h4 | 815 | 1617 | 47 | 78 |

|        |                                                                                                                                                             |                                |      |      |    |    |
|--------|-------------------------------------------------------------------------------------------------------------------------------------------------------------|--------------------------------|------|------|----|----|
| Q8BHG1 | Nardilysin (EC 3.4.24.61) (N-arginine dibasic convertase) (NRD convertase) (NRD-C)                                                                          | Nrd1                           | 53   | 54   | 13 | 21 |
| Q8VDM4 | 26S proteasome non-ATPase regulatory subunit 2 (26S proteasome regulatory subunit RPN1) (26S proteasome regulatory subunit S2) (26S proteasome subunit p97) | Psmc2                          | 113  | 157  | 18 | 29 |
| P62082 | 40S ribosomal protein S7                                                                                                                                    | Rps7                           | 104  | 126  | 9  | 14 |
| P63158 | High mobility group protein B1 (High mobility group protein 1) (HMG-1)                                                                                      | Hmgb1 (Hmg-1) (Hmg1)           | 153  | 405  | 25 | 38 |
| O55142 | 60S ribosomal protein L35a                                                                                                                                  | Rpl35a                         | 24   | 50   | 4  | 6  |
| Q9D1H6 | Protein HRPAP20 (Hormone-regulated proliferation-associated protein of 20 kDa homolog)                                                                      | Hrpap20                        | 70   | 38   | 6  | 9  |
| Q8BUG5 | Calcyphosin-2 (Calcyphosine-2)                                                                                                                              | Caps2                          | 17   | 28   | 8  | 12 |
| P50247 | Adenosylhomocysteinase (AdoHcyase) (EC 3.3.1.1) (S-adenosyl-L-homocysteine hydrolase) (Liver copper-binding protein) (CUBP)                                 | Ahcy                           | 90   | 106  | 10 | 15 |
| Q99K85 | Phosphoserine aminotransferase (PSAT) (EC 2.6.1.52) (Phosphohydroxythreonine aminotransferase) (Endometrial progesterone-induced protein) (EPIP)            | Psat1 (Psa) (Psat)             | 162  | 541  | 16 | 24 |
| Q9QZ39 | Alpha-N-acetylgalactosaminide alpha-2,6-sialyltransferase 1 (EC 2.4.99.3) (GalNAc alpha-2,6-sialyltransferase I) (ST6GalNAc I) (Sialyltransferase 7A)       | St6galnac1 (Siat7a)            | 27   | 18   | 11 | 16 |
| P35761 | Dual specificity protein kinase TTK (ESK) (PYT) (EC 2.7.12.1)                                                                                               | Ttk (Esk)                      | 14   | 34   | 9  | 13 |
| P68510 | 14-3-3 protein eta                                                                                                                                          | Ywhah                          | 707  | 962  | 58 | 80 |
| P05214 | Tubulin alpha-3 chain (Tubulin alpha-3/alpha-7 chain) (Alpha-tubulin 3/7) (Alpha-tubulin isotype M-alpha-3/7)                                               | Tuba3a (Tuba3); Tuba3b (Tuba7) | 1112 | 1288 | 61 | 84 |

|        |                                                                                                                                                                |                           |      |      |     |     |
|--------|----------------------------------------------------------------------------------------------------------------------------------------------------------------|---------------------------|------|------|-----|-----|
| P17047 | Lysosome-associated membrane glycoprotein 2 (LAMP-2) (Lysosomal membrane glycoprotein type B) (LGP-B) (CD107 antigen-like family member B) (CD antigen CD107b) | Lamp2 (Lamp-2)            | 26   | 29   | 8   | 11  |
| Q61937 | Nucleophosmin (NPM) (Nucleolar phosphoprotein B23) (Numatrin) (Nucleolar protein NO38)                                                                         | Npm1                      | 92   | 66   | 11  | 15  |
| Q99M73 | Keratin, type II cuticular Hb4 (Type II hair keratin Hb4) (Keratin-84) (K84) (65 kDa type II keratin)                                                          | Krt84 (Krt2-16) (Krtthb4) | 36   | 74   | 14  | 19  |
| Q8K298 | Actin-binding protein anillin                                                                                                                                  | Anln                      | 16   | 28   | 17  | 23  |
| Q6P8J2 | Diamine acetyltransferase 2 (EC 2.3.1.57) (Spermidine/spermine N(1)-acetyltransferase 2) (Polyamine N-acetyltransferase 2)                                     | Sat2 (Ssat2)              | 33   | 23   | 6   | 8   |
| P70296 | Phosphatidylethanolamine-binding protein 1 (PEBP-1) (HCNPPp) [Cleaved into: Hippocampal cholinergic neurostimulating peptide (HCNP)]                           | Pebp1 (Pbp) (Pebp)        | 532  | 730  | 25  | 33  |
| P70168 | Importin subunit beta-1 (Karyopherin subunit beta-1) (Nuclear factor P97) (Pore targeting complex 97 kDa subunit) (PTAC97) (SCG)                               | Kpnb1 (Impnb)             | 48   | 17   | 13  | 17  |
| P20152 | Vimentin                                                                                                                                                       | Vim                       | 1749 | 2397 | 125 | 157 |
| P17183 | Gamma-enolase (EC 4.2.1.11) (2-phospho-D-glycerate hydro-lyase) (Neural enolase) (Neuron-specific enolase) (NSE) (Enolase 2)                                   | Eno2 (Eno-2)              | 228  | 181  | 12  | 15  |
| P31001 | Desmin                                                                                                                                                         | Des                       | 169  | 224  | 25  | 31  |
| Q811J3 | Iron-responsive element-binding protein 2 (IRE-BP 2) (Iron regulatory protein 2) (IRP2)                                                                        | Ireb2 (Irp2)              | 69   | 119  | 142 | 176 |

|        |                                                                                                                                                                                                                                                                                                                    |                                  |     |     |    |    |
|--------|--------------------------------------------------------------------------------------------------------------------------------------------------------------------------------------------------------------------------------------------------------------------------------------------------------------------|----------------------------------|-----|-----|----|----|
| P59270 | Galactosylgalactosylxylosylprotein 3-beta-glucuronosyltransferase 2 (EC 2.4.1.135) (Beta-1,3-glucuronyltransferase 2) (UDP-glucuronosyltransferase-S) (Glucuronosyltransferase-S) (GlcAT-S) (GlcAT-D)                                                                                                              | B3gat2 (Glcats)                  | 29  | 16  | 9  | 11 |
| O08648 | Mitogen-activated protein kinase kinase kinase 4 (EC 2.7.11.25) (MAPK/ERK kinase kinase 4) (MEK kinase 4) (MEKK 4)                                                                                                                                                                                                 | Map3k4 (Mekk4)                   | 37  | 16  | 19 | 23 |
| P05784 | Keratin, type I cytoskeletal 18 (Cytokeratin-18) (CK-18) (Keratin-18) (K18) (Cytokeratin endo B) (Keratin D)                                                                                                                                                                                                       | Krt18 (Kerd) (Krt1-18)           | 37  | 46  | 10 | 12 |
| P80313 | T-complex protein 1 subunit eta (TCP-1-eta) (CCT-eta)                                                                                                                                                                                                                                                              | Cct7 (Ccth)                      | 49  | 50  | 11 | 13 |
| Q61122 | NGFI-A-binding protein 1 (EGR-1-binding protein 1)                                                                                                                                                                                                                                                                 | Nab1                             | 30  | 25  | 6  | 7  |
| Q80XA6 | RalBP1-associated Eps domain-containing protein 2 (RalBP1-interacting protein 2) (Partner of RalBP1)                                                                                                                                                                                                               | Reps2 (Pob1)                     | 33  | 31  | 6  | 7  |
| Q9WUM4 | Coronin-1C (Coronin-3)                                                                                                                                                                                                                                                                                             | Coro1c                           | 42  | 28  | 18 | 21 |
| Q6GSS7 | Histone H2A type 2-A (H2A.2) (H2a-614) (H2a-615)                                                                                                                                                                                                                                                                   | Hist2h2aa1; Hist2h2aa2           | 505 | 763 | 18 | 21 |
| Q5SPW0 | Vacuolar protein sorting-associated protein 54 (Tumor antigen SLP-8p homolog)                                                                                                                                                                                                                                      | Vps54                            | 36  | 28  | 13 | 15 |
| P48754 | Breast cancer type 1 susceptibility protein homolog                                                                                                                                                                                                                                                                | Brca1                            | 28  | 25  | 26 | 30 |
| Q9QWY8 | 130 kDa phosphatidylinositol 4,5-biphosphate-dependent ARF1 GTPase-activating protein (PIP2-dependent ARF1 GAP) (ADP-ribosylation factor-directed GTPase-activating protein 1) (ARF GTPase-activating protein 1) (Development and differentiation-enhancing factor 1) (Differentiation-enhancing factor 1) (DEF-1) | Ddef1 (Asap1) (Kiaa1249) (Shag1) | 26  | 23  | 14 | 16 |

|        |                                                                                                                                                                                                                     |                            |     |     |     |     |
|--------|---------------------------------------------------------------------------------------------------------------------------------------------------------------------------------------------------------------------|----------------------------|-----|-----|-----|-----|
| P97820 | Mitogen-activated protein kinase kinase kinase 4 (EC 2.7.11.1) (MAPK/ERK kinase kinase 4) (MEK kinase kinase 4) (MEKKK 4) (HPK/GCK-like kinase HGK) (Nck-interacting kinase)                                        | Map4k4 (Nik)               | 65  | 54  | 15  | 17  |
| P62270 | 40S ribosomal protein S18 (Ke-3) (Ke3)                                                                                                                                                                              | Rps18                      | 210 | 209 | 15  | 17  |
| P62908 | 40S ribosomal protein S3                                                                                                                                                                                            | Rps3                       | 778 | 762 | 39  | 44  |
| Q64467 | Glyceraldehyde-3-phosphate dehydrogenase, testis-specific (EC 1.2.1.12) (Spermatogenic glyceraldehyde-3-phosphate dehydrogenase) (Spermatogenic cell-specific glyceraldehyde 3-phosphate dehydrogenase 2) (GAPDH-2) | Gapdhs (Gapds) (Gapds)     | 75  | 781 | 26  | 29  |
| P26618 | Alpha-type platelet-derived growth factor receptor (EC 2.7.10.1) (PDGF-R-alpha) (CD140 antigen-like family member A) (CD antigen CD140a)                                                                            | Pdgfra                     | 37  | 73  | 160 | 178 |
| P19253 | 60S ribosomal protein L13a (Transplantation antigen P198) (Tum-P198 antigen)                                                                                                                                        | Rpl13a (P198) (Tstap198-7) | 27  | 65  | 9   | 10  |
| Q9R0Q7 | Prostaglandin E synthase 3 (EC 5.3.99.3) (Cytosolic prostaglandin E2 synthase) (cPGES) (Telomerase-binding protein p23) (Hsp90 co-chaperone) (Progesterone receptor complex p23) (Sid 3177)                         | Ptges3 (Sid3177) (Tebp)    | 124 | 239 | 10  | 11  |
| P49717 | DNA replication licensing factor MCM4 (CDC21 homolog) (P1-CDC21)                                                                                                                                                    | Mcm4 (Cdc21) (Mcmd4)       | 29  | 18  | 11  | 12  |
| Q9QUI0 | Transforming protein RhoA                                                                                                                                                                                           | Rhoa (Arha) (Arha2)        | 117 | 231 | 11  | 12  |
| Q6P9Z1 | SWI/SNF-related matrix-associated actin-dependent regulator of chromatin subfamily D member 3 (60 kDa BRG-1/Brm-associated factor subunit C) (BRG1-associated factor 60C) (mBAF60c)                                 | Smarcd3 (Baf60c)           | 29  | 19  | 46  | 50  |

|        |                                                                                                                                                                                                                                       |                                       |      |     |    |    |
|--------|---------------------------------------------------------------------------------------------------------------------------------------------------------------------------------------------------------------------------------------|---------------------------------------|------|-----|----|----|
| P70298 | Homeobox protein cut-like 2 (Cut-like 2)<br>(Homeobox protein Cux-2)                                                                                                                                                                  | Cux2 (Cutl2)                          | 30   | 22  | 12 | 13 |
| Q9Z104 | SWI/SNF-related matrix-associated actin-dependent regulator of chromatin subfamily E member 1-related (SMARCE1-related protein) (HMG box-containing protein 20B) (Structural DNA-binding protein BRAF35) (BRCA2-associated factor 35) | Hmg20b (Braf35) (Hmgx2) (Smarce1r)    | 30   | 20  | 14 | 15 |
| P11984 | T-complex protein 1 subunit alpha A (TCP-1-alpha) (CCT-alpha) (Tailless complex polypeptide 1A) (TCP-1-A)                                                                                                                             | Cct1 (Ccta) (Tcp1)                    | 29   | 66  | 14 | 15 |
| P62242 | 40S ribosomal protein S8                                                                                                                                                                                                              | Rps8                                  | 479  | 372 | 18 | 19 |
| P26350 | Prothymosin alpha [Cleaved into: Thymosin alpha]                                                                                                                                                                                      | Ptma                                  | 34   | 120 | 2  | 2  |
| Q8VC28 | Aldo-keto reductase family 1 member C13 (EC 1.1.1.-)                                                                                                                                                                                  | Akr1c13                               | 32   | 23  | 8  | 8  |
| Q7TNP2 | Serine/threonine-protein phosphatase 2A 65 kDa regulatory subunit A beta isoform (PP2A, subunit A, PR65-beta isoform) (PP2A, subunit A, R1-beta isoform)                                                                              | Ppp2r1b                               | 26   | 22  | 9  | 9  |
| Q61781 | Keratin, type I cytoskeletal 14 (Cytokeratin-14) (CK-14) (Keratin-14) (K14)                                                                                                                                                           | Krt14 (Krt1-14)                       | 38   | 37  | 10 | 10 |
| Q8BSS9 | Liprin-alpha-2 (Protein tyrosine phosphatase receptor type f polypeptide-interacting protein alpha-2) (PTPRF-interacting protein alpha-2)                                                                                             | Ppfia2                                | 36   | 21  | 22 | 22 |
| Q62261 | Spectrin beta chain, brain 1 (Spectrin, non-erythroid beta chain 1) (Beta-II spectrin) (Fodrin beta chain) (Embryonic liver fodrin)                                                                                                   | Sptbn1 (Elf) (Spnb-2) (Spnb2) (Sptb2) | 56   | 54  | 48 | 48 |
| P68254 | 14-3-3 protein theta (14-3-3 protein tau)                                                                                                                                                                                             | Ywhaq                                 | 1104 | 994 | 92 | 91 |
| Q91YE5 | Bromodomain adjacent to zinc finger domain protein 2A (Transcription termination factor I-interacting protein 5) (TTF-I-interacting protein 5) (Tip5)                                                                                 | Baz2a (Tip5)                          | 36   | 15  | 56 | 55 |



|        |                                                                                                                                                                                                             |                       |     |     |    |    |
|--------|-------------------------------------------------------------------------------------------------------------------------------------------------------------------------------------------------------------|-----------------------|-----|-----|----|----|
| P16406 | Glutamyl aminopeptidase (EC 3.4.11.7) (EAP) (Aminopeptidase A) (APA) (BP-1/6C3 antigen) (CD antigen CD249)                                                                                                  | Enpep                 | 98  | 90  | 48 | 46 |
| Q91V92 | ATP-citrate synthase (EC 2.3.3.8) (ATP-citrate (pro-S)-lyase) (Citrate cleavage enzyme)                                                                                                                     | Acly                  | 349 | 488 | 45 | 43 |
| Q8R1B4 | Eukaryotic translation initiation factor 3 subunit C (eIF3c) (Eukaryotic translation initiation factor 3 subunit 8) (eIF3 p110)                                                                             | Eif3c (Eif3s8)        | 34  | 63  | 22 | 21 |
| Q9CPR4 | 60S ribosomal protein L17                                                                                                                                                                                   | Rpl17                 | 187 | 135 | 15 | 14 |
| Q68FD5 | Clathrin heavy chain 1                                                                                                                                                                                      | Cltc                  | 944 | 884 | 88 | 78 |
| Q9DBJ1 | Phosphoglycerate mutase 1 (EC 5.4.2.1) (EC 5.4.2.4) (EC 3.1.3.13) (Phosphoglycerate mutase isozyme B) (PGAM-B) (BPG-dependent PGAM 1)                                                                       | Pgam1                 | 612 | 746 | 35 | 31 |
| Q8CJ27 | Abnormal spindle-like microcephaly-associated protein homolog (Spindle and hydroxyurea checkpoint abnormal protein) (Calmodulin-binding protein Sha1) (Calmodulin binding protein 1)                        | Aspm (Calmbp1) (Sha1) | 35  | 23  | 55 | 48 |
| Q9JJK8 | Serine/threonine-protein kinase ATR (EC 2.7.11.1) (Ataxia telangiectasia and Rad3-related protein)                                                                                                          | Atr                   | 20  | 25  | 72 | 62 |
| Q9D868 | Peptidyl-prolyl cis-trans isomerase H (PPIase H) (Rotamase H) (EC 5.2.1.8)                                                                                                                                  | Ppih                  | 55  | 31  | 7  | 6  |
| P67984 | 60S ribosomal protein L22 (Heparin-binding protein HBp15)                                                                                                                                                   | Rpl22                 | 59  | 48  | 7  | 6  |
| P35979 | 60S ribosomal protein L12                                                                                                                                                                                   | Rpl12                 | 208 | 389 | 14 | 12 |
| Q9CZM2 | 60S ribosomal protein L15                                                                                                                                                                                   | Rpl15                 | 225 | 107 | 21 | 18 |
| Q6ZWN5 | 40S ribosomal protein S9                                                                                                                                                                                    | Rps9                  | 459 | 248 | 47 | 40 |
| Q9JM52 | Misshapen-like kinase 1 (EC 2.7.11.1) (Mitogen-activated protein kinase kinase kinase 6) (MAPK/ERK kinase kinase 6) (MEK kinase kinase 6) (MEKKK 6) (Misshapen/NIK-related kinase) (GCK family kinase MiNK) | Mink1 (Map4k6) (Mink) | 18  | 54  | 13 | 11 |

|        |                                                                                                                                                                                                   |                             |     |     |    |    |
|--------|---------------------------------------------------------------------------------------------------------------------------------------------------------------------------------------------------|-----------------------------|-----|-----|----|----|
| Q9CQN1 | Heat shock protein 75 kDa, mitochondrial (HSP 75) (Tumor necrosis factor type 1 receptor-associated protein) (TRAP-1) (TNFR-associated protein 1)                                                 | Trap1 (Hsp75)               | 197 | 335 | 13 | 11 |
| P14131 | 40S ribosomal protein S16                                                                                                                                                                         | Rps16                       | 160 | 126 | 19 | 16 |
| P20029 | 78 kDa glucose-regulated protein (GRP 78) (Heat shock 70 kDa protein 5) (Immunoglobulin heavy chain-binding protein) (BiP)                                                                        | Hspa5 (Grp78)               | 262 | 312 | 25 | 21 |
| Q80TB8 | Probable oxidoreductase KIAA1576 (EC 1.-.-.-)                                                                                                                                                     | Kiaa1576                    | 25  | 14  | 25 | 21 |
| P46664 | Adenylosuccinate synthetase isozyme 2 (AMPSase 2) (AdSS 2) (EC 6.3.4.4) (Adenylosuccinate synthetase, non-muscle isozyme) (Adenylosuccinate synthetase, acidic isozyme) (IMP--aspartate ligase 2) | Adss (Adss2)                | 36  | 66  | 12 | 10 |
| Q05816 | Fatty acid-binding protein, epidermal (E-FABP) (Fatty acid-binding protein 5) (Psoriasis-associated fatty acid-binding protein homolog) (PA-FABP) (Keratinocyte lipid-binding protein)            | Fabp5 (Fabpe) (Klbp) (Mal1) | 331 | 206 | 18 | 15 |
| P11983 | T-complex protein 1 subunit alpha B (TCP-1-alpha) (CCT-alpha) (Tailless complex polypeptide 1B) (TCP-1-B)                                                                                         | Cct1 (Ccta) (Tcp1)          | 29  | 66  | 18 | 15 |
| Q91XQ0 | Dynein heavy chain 8, axonemal (Axonemal beta dynein heavy chain 8) (Ciliary dynein heavy chain 8)                                                                                                | Dnahc8                      | 47  | 51  | 77 | 64 |
| Q6URW6 | Myosin-14 (Myosin heavy chain 14) (Myosin heavy chain, non-muscle IIc) (Non-muscle myosin heavy chain IIc) (NMHC II-C)                                                                            | Myh14                       | 60  | 48  | 53 | 44 |
| Q64512 | Tyrosine-protein phosphatase non-receptor type 13 (EC 3.1.3.48) (Protein tyrosine phosphatase PTP-BL) (Protein-tyrosine phosphatase RIP) (Protein tyrosine phosphatase DPZPTP) (PTP36)            | Ptpn13 (Ptp14)              | 28  | 27  | 26 | 21 |

|        |                                                                                                                                                                                                                                        |                           |     |     |     |     |
|--------|----------------------------------------------------------------------------------------------------------------------------------------------------------------------------------------------------------------------------------------|---------------------------|-----|-----|-----|-----|
| Q9Z1M8 | Protein Red (Protein RER) (IK factor) (Cytokine IK)                                                                                                                                                                                    | Ik (Red) (Rer)            | 29  | 23  | 10  | 8   |
| P62852 | 40S ribosomal protein S25                                                                                                                                                                                                              | Rps25                     | 101 | 100 | 15  | 12  |
| Q99MD9 | Nuclear autoantigenic sperm protein (NASP)                                                                                                                                                                                             | Nasp                      | 365 | 293 | 34  | 27  |
| Q91ZU6 | Bullous pemphigoid antigen 1, isoforms 1/2/3/4 (BPA) (Hemidesmosomal plaque protein) (Dystonia musculorum protein) (Dystonin)                                                                                                          | Dst (Bpag1)               | 78  | 38  | 126 | 100 |
| Q8BP67 | 60S ribosomal protein L24                                                                                                                                                                                                              | Rpl24                     | 354 | 214 | 24  | 19  |
| P62754 | 40S ribosomal protein S6 (Phosphoprotein NP33)                                                                                                                                                                                         | Rps6                      | 127 | 283 | 19  | 15  |
| Q6A078 | Centrosomal protein of 290 kDa (Cep290) (Nephrocystin-6)                                                                                                                                                                               | Cep290 (Kiaa0373) (Nphp6) | 32  | 57  | 85  | 66  |
| Q8CGK3 | Lon protease homolog, mitochondrial (EC 3.4.21.-) (Lon protease-like protein) (LONP) (Mitochondrial ATP-dependent protease Lon) (Serine protease 15)                                                                                   | Lonp1 (Prss15)            | 21  | 30  | 43  | 33  |
| P62702 | 40S ribosomal protein S4, X isoform                                                                                                                                                                                                    | Rps4x (Rps4)              | 402 | 304 | 30  | 23  |
| P47856 | Glucosamine--fructose-6-phosphate aminotransferase [isomerizing] 1 (EC 2.6.1.16) (Glutamine:fructose 6 phosphate amidotransferase 1) (GFAT 1) (GFAT1) (D-fructose-6-phosphate amidotransferase 1) (Hexosephosphate aminotransferase 1) | Gfpt1 (Gfpt)              | 17  | 29  | 17  | 13  |
| Q569Z6 | Thyroid hormone receptor-associated protein 3 (Thyroid hormone receptor-associated protein complex 150 kDa component) (Trap150)                                                                                                        | Thrap3 (Trap150)          | 29  | 48  | 21  | 16  |
| P70670 | Nascent polypeptide-associated complex subunit alpha, muscle-specific form (Alpha-NAC, muscle-specific form)                                                                                                                           | Naca (Gm1878)             | 22  | 130 | 29  | 22  |
| P58043 | Sestrin-2                                                                                                                                                                                                                              | Sesn2 (Sest2)             | 21  | 34  | 4   | 3   |

|        |                                                                                                                                                                                                                            |                                                   |     |     |    |    |
|--------|----------------------------------------------------------------------------------------------------------------------------------------------------------------------------------------------------------------------------|---------------------------------------------------|-----|-----|----|----|
| Q9DBG5 | Mannose-6-phosphate receptor-binding protein 1 (Cargo selection protein TIP47)                                                                                                                                             | M6prbp1 (Tip47)                                   | 25  | 22  | 8  | 6  |
| Q9DBP5 | UMP-CMP kinase (EC 2.7.4.14) (Cytidylate kinase) (Deoxycytidylate kinase) (Cytidine monophosphate kinase) (Uridine monophosphate kinase) (Uridine monophosphate/cytidine monophosphate kinase) (UMP/CMP kinase) (UMP/CMPK) | Cmpk1 (Cmk) (Cmpk) (Uck) (Umk) (Umpk)             | 107 | 93  | 12 | 9  |
| P62751 | 60S ribosomal protein L23a                                                                                                                                                                                                 | Rpl23a                                            | 75  | 49  | 16 | 12 |
| P25444 | 40S ribosomal protein S2 (S4) (LLRep3 protein)                                                                                                                                                                             | Rps2 (Llrep3) (Rps4)                              | 217 | 50  | 26 | 19 |
| Q80TS7 | Dendrin                                                                                                                                                                                                                    | Ddn (Gm748) (Kiaa0749)                            | 31  | 24  | 11 | 8  |
| Q91Z67 | SLIT-ROBO Rho GTPase-activating protein 2 (srGAP2) (Formin-binding protein 2) (Formin-binding protein 27) (FBP-27)                                                                                                         | Srgap2 (Fbp27) (Fnbp2)                            | 77  | 48  | 11 | 8  |
| P62991 | Ubiquitin                                                                                                                                                                                                                  | Rps27a (Uba80) (Ubcep1); Uba52 (Ubcep2); Ubb; Ubc | 61  | 54  | 11 | 8  |
| Q9CR57 | 60S ribosomal protein L14                                                                                                                                                                                                  | Rpl14                                             | 508 | 391 | 33 | 24 |
| P27659 | 60S ribosomal protein L3 (J1 protein)                                                                                                                                                                                      | Rpl3                                              | 192 | 75  | 25 | 18 |
| Q64237 | Dopamine beta-hydroxylase (EC 1.14.17.1) (Dopamine beta-monooxygenase) [Cleaved into: Soluble dopamine beta-hydroxylase]                                                                                                   | Dbh                                               | 44  | 23  | 7  | 5  |
| P14869 | 60S acidic ribosomal protein P0 (L10E)                                                                                                                                                                                     | Rplp0 (Arbp)                                      | 115 | 334 | 28 | 20 |
| P17751 | Triosephosphate isomerase (TIM) (EC 5.3.1.1) (Triose-phosphate isomerase)                                                                                                                                                  | Tpi1 (Tpi)                                        | 706 | 519 | 35 | 25 |
| Q7TQI3 | Ubiquitin thioesterase OTUB1 (EC 3.1.2.-) (Otubain-1) (OTU domain-containing ubiquitin aldehyde-binding protein 1) (Ubiquitin-specific-processing protease OTUB1) (Deubiquitinating enzyme OTUB1)                          | Otub1                                             | 152 | 109 | 10 | 7  |

|        |                                                                                                                                                                                                                                                                                                        |                         |      |     |    |    |
|--------|--------------------------------------------------------------------------------------------------------------------------------------------------------------------------------------------------------------------------------------------------------------------------------------------------------|-------------------------|------|-----|----|----|
| Q6ZQ12 | Ninein-like protein                                                                                                                                                                                                                                                                                    | Nlp (Kiaa0980)          | 15   | 34  | 23 | 16 |
| P61979 | Heterogeneous nuclear ribonucleoprotein K (hnRNP K)                                                                                                                                                                                                                                                    | Hnrnpk (Hnrpk)          | 225  | 46  | 18 | 12 |
| O88444 | Adenylate cyclase type 1 (EC 4.6.1.1) (Adenylate cyclase type I) (ATP pyrophosphate-lyase 1) (Adenylyl cyclase 1) (Ca(2+)/calmodulin-activated adenylyl cyclase)                                                                                                                                       | Adcy1                   | 33   | 31  | 26 | 17 |
| Q9CXW4 | 60S ribosomal protein L11                                                                                                                                                                                                                                                                              | Rpl11                   | 72   | 79  | 11 | 7  |
| Q7TMM9 | Tubulin beta-2A chain                                                                                                                                                                                                                                                                                  | Tubb2a (Tubb2)          | 1422 | 775 | 83 | 52 |
| Q61983 | Sodium-dependent phosphate transport protein 1 (Sodium/phosphate cotransporter 1) (Na(+)/PI cotransporter 1) (Solute carrier family 17 member 1) (Renal sodium-dependent phosphate transport protein 1) (Renal sodium-phosphate transport protein 1) (Renal Na(+)-dependent phosphate cotransporter 1) | Slc17a1 (Npt1)          | 31   | 33  | 8  | 5  |
| Q80U87 | Ubiquitin carboxyl-terminal hydrolase 8 (EC 3.1.2.15) (Ubiquitin thioesterase 8) (Ubiquitin-specific-processing protease 8) (Deubiquitinating enzyme 8) (mUBPy)                                                                                                                                        | Usp8 (Kiaa0055) (UbpY)  | 29   | 23  | 24 | 15 |
| P62717 | 60S ribosomal protein L18a                                                                                                                                                                                                                                                                             | Rpl18a                  | 242  | 62  | 21 | 13 |
| P84099 | 60S ribosomal protein L19                                                                                                                                                                                                                                                                              | Rpl19                   | 39   | 47  | 13 | 8  |
| P62301 | 40S ribosomal protein S13                                                                                                                                                                                                                                                                              | Rps13                   | 77   | 100 | 23 | 14 |
| O88291 | Zinc finger protein 326 (Zinc finger protein-associated with nuclear matrix of 75 kDa)                                                                                                                                                                                                                 | Znf326 (Zan75) (Zfp326) | 41   | 55  | 5  | 3  |
| Q9D1R9 | 60S ribosomal protein L34                                                                                                                                                                                                                                                                              | Rpl34                   | 34   | 32  | 10 | 6  |
| Q9QWK5 | Baculoviral IAP repeat-containing protein 1a (Neuronal apoptosis inhibitory protein 1)                                                                                                                                                                                                                 | Naip1 (Birc1a) (Naip)   | 21   | 28  | 20 | 12 |

|                      |        |                                                                                                                                                     |                                |      |     |     |    |
|----------------------|--------|-----------------------------------------------------------------------------------------------------------------------------------------------------|--------------------------------|------|-----|-----|----|
|                      | P63017 | Heat shock cognate 71 kDa protein (Heat shock 70 kDa protein 8)                                                                                     | Hspa8 (Hsc70) (Hsc73)          | 1719 | 959 | 119 | 70 |
|                      | P62900 | 60S ribosomal protein L31                                                                                                                           | Rpl31                          | 124  | 62  | 12  | 7  |
|                      | P41105 | 60S ribosomal protein L28                                                                                                                           | Rpl28                          | 49   | 41  | 19  | 11 |
|                      | Q9CZX8 | 40S ribosomal protein S19                                                                                                                           | Rps19                          | 206  | 146 | 19  | 11 |
|                      | P47963 | 60S ribosomal protein L13 (A52)                                                                                                                     | Rpl13                          | 744  | 379 | 47  | 27 |
|                      | Q9QUK4 | Baculoviral IAP repeat-containing protein 1b (Neuronal apoptosis inhibitory protein 2)                                                              | Naip2 (Birc1b) (Naip-rs6)      | 21   | 28  | 14  | 8  |
|                      | Q9D8N3 | Transmembrane protein 86A                                                                                                                           | Tmem86a                        | 38   | 27  | 30  | 17 |
|                      | P97461 | 40S ribosomal protein S5                                                                                                                            | Rps5                           | 89   | 33  | 32  | 18 |
|                      | Q64105 | Sepiapterin reductase (SPR) (EC 1.1.1.153)                                                                                                          | Spr                            | 43   | 27  | 9   | 5  |
|                      | P11103 | Poly [ADP-ribose] polymerase 1 (PARP-1) (EC 2.4.2.30) (ADPRT) (NAD(+) ADP-ribosyltransferase 1) (Poly[ADP-ribose] synthetase 1) (msPARP)            | Parp1 (Adprp) (Adprt) (Adprt1) | 21   | 26  | 17  | 9  |
|                      | P97351 | 40S ribosomal protein S3a                                                                                                                           | Rps3a                          | 899  | 392 | 50  | 26 |
|                      | Q9ERD7 | Tubulin beta-3 chain                                                                                                                                | Tubb3                          | 780  | 383 | 52  | 27 |
| Protein biosynthesis | P06745 | Glucose-6-phosphate isomerase (GPI) (EC 5.3.1.9) (Phosphoglucose isomerase) (PGI) (Phosphohexose isomerase) (PHI) (Neuroleukin) (NLK)               | Gpi (Gpi1)                     | 39   | 107 | 12  | 22 |
|                      | Q99N50 | Synaptotagmin-like protein 2 (Exophilin-4)                                                                                                          | Syt12 (Slp2)                   | 26   | 77  | 10  | 18 |
|                      | P57776 | Elongation factor 1-delta (EF-1-delta)                                                                                                              | Eef1d                          | 109  | 35  | 3   | 5  |
|                      | P35980 | 60S ribosomal protein L18                                                                                                                           | Rpl18                          | 32   | 22  | 51  | 85 |
|                      | Q6ZWX6 | Eukaryotic translation initiation factor 2 subunit 1 (Eukaryotic translation initiation factor 2 subunit alpha) (eIF-2-alpha) (EIF-2alpha) (EIF-2A) | Eif2s1 (Eif2a)                 | 27   | 177 | 7   | 11 |
|                      | P62082 | 40S ribosomal protein S7                                                                                                                            | Rps7                           | 104  | 126 | 9   | 14 |
|                      | O55142 | 60S ribosomal protein L35a                                                                                                                          | Rpl35a                         | 24   | 50  | 4   | 6  |
|                      | Q8BUG5 | Calcyphosin-2 (Calcyphosine-2)                                                                                                                      | Caps2                          | 17   | 28  | 8   | 12 |
|                      | P35761 | Dual specificity protein kinase TTK (ESK) (PYT) (EC 2.7.12.1)                                                                                       | Ttk (Esk)                      | 14   | 34  | 9   | 13 |

|        |                                                                                                                                                                         |                     |     |     |    |    |
|--------|-------------------------------------------------------------------------------------------------------------------------------------------------------------------------|---------------------|-----|-----|----|----|
| O70251 | Elongation factor 1-beta (EF-1-beta)                                                                                                                                    | Eef1b (Eef1b2)      | 39  | 102 | 7  | 10 |
| P17047 | Lysosome-associated membrane glycoprotein 2 (LAMP-2) (Lysosomal membrane glycoprotein type B) (LGP-B) (CD107 antigen-like family member B) (CD antigen CD107b)          | Lamp2 (Lamp-2)      | 26  | 29  | 8  | 11 |
| Q6P8J2 | Diamine acetyltransferase 2 (EC 2.3.1.57) (Spermidine/spermine N(1)-acetyltransferase 2) (Polyamine N-acetyltransferase 2)                                              | Sat2 (Ssat2)        | 33  | 23  | 6  | 8  |
| O70456 | 14-3-3 protein sigma (Stratifin)                                                                                                                                        | Sfn (Mkrn3)         | 573 | 666 | 56 | 71 |
| Q63ZW7 | InaD-like protein (Inadl protein) (Pals1-associated tight junction protein) (Protein associated to tight junctions) (Channel-interacting PDZ domain-containing protein) | Inadl (Cipp) (Patj) | 18  | 30  | 12 | 15 |
| Q8R2X8 | Golgin-45 (Basic leucine zipper nuclear factor 1)                                                                                                                       | Blzf1               | 28  | 22  | 13 | 16 |
| Q8BGD9 | Eukaryotic translation initiation factor 4B (eIF-4B)                                                                                                                    | Eif4b               | 238 | 306 | 13 | 16 |
| P51880 | Fatty acid-binding protein, brain (B-FABP) (Fatty acid-binding protein 7) (Brain lipid-binding protein) (BLBP)                                                          | Fabp7 (Blbp)        | 933 | 856 | 31 | 38 |
| Q8VII8 | Mineralocorticoid receptor (MR) (Nuclear receptor subfamily 3 group C member 2)                                                                                         | Nr3c2 (Mlr)         | 28  | 22  | 18 | 22 |
| O08648 | Mitogen-activated protein kinase kinase kinase 4 (EC 2.7.11.25) (MAPK/ERK kinase kinase 4) (MEK kinase 4) (MEKK 4)                                                      | Map3k4 (Mekk4)      | 37  | 16  | 19 | 23 |
| P49025 | Citron Rho-interacting kinase (CRIK) (EC 2.7.11.1) (Rho-interacting, serine/threonine-protein kinase 21)                                                                | Cit                 | 49  | 67  | 67 | 81 |
| O08810 | 116 kDa U5 small nuclear ribonucleoprotein component (U5 snRNP-specific protein, 116 kDa) (U5-116 kDa) (Elongation factor Tu GTP-binding domain-containing protein 2)   | Eftud2 (Snrp116)    | 80  | 68  | 21 | 25 |

|        |                                                                                                                                                                                                                                                                                                                    |                                  |      |      |     |     |
|--------|--------------------------------------------------------------------------------------------------------------------------------------------------------------------------------------------------------------------------------------------------------------------------------------------------------------------|----------------------------------|------|------|-----|-----|
| Q8C3X4 | GTP-binding protein GUF1 homolog                                                                                                                                                                                                                                                                                   | Guf1                             | 311  | 506  | 412 | 483 |
| Q80XA6 | RalBP1-associated Eps domain-containing protein 2 (RalBP1-interacting protein 2) (Partner of RalBP1)                                                                                                                                                                                                               | Reps2 (Pob1)                     | 33   | 31   | 6   | 7   |
| Q9QWY8 | 130 kDa phosphatidylinositol 4,5-biphosphate-dependent ARF1 GTPase-activating protein (PIP2-dependent ARF1 GAP) (ADP-ribosylation factor-directed GTPase-activating protein 1) (ARF GTPase-activating protein 1) (Development and differentiation-enhancing factor 1) (Differentiation-enhancing factor 1) (DEF-1) | Ddef1 (Asap1) (Kiaa1249) (Shag1) | 26   | 23   | 14  | 16  |
| P97820 | Mitogen-activated protein kinase kinase kinase kinase 4 (EC 2.7.11.1) (MAPK/ERK kinase kinase kinase 4) (MEK kinase kinase 4) (MEKKK 4) (HPK/GCK-like kinase HGK) (Nck-interacting kinase)                                                                                                                         | Map4k4 (Nik)                     | 65   | 54   | 15  | 17  |
| P62270 | 40S ribosomal protein S18 (Ke-3) (Ke3)                                                                                                                                                                                                                                                                             | Rps18                            | 210  | 209  | 15  | 17  |
| P62908 | 40S ribosomal protein S3                                                                                                                                                                                                                                                                                           | Rps3                             | 778  | 762  | 39  | 44  |
| P19253 | 60S ribosomal protein L13a (Transplantation antigen P198) (Tum-P198 antigen)                                                                                                                                                                                                                                       | Rpl13a (P198) (Tstap198-7)       | 27   | 65   | 9   | 10  |
| Q9D8N0 | Elongation factor 1-gamma (EF-1-gamma) (eEF-1B gamma)                                                                                                                                                                                                                                                              | Eef1g                            | 31   | 85   | 11  | 12  |
| Q8BKC5 | Importin-5 (Imp5) (Importin subunit beta-3) (Karyopherin beta-3) (Ran-binding protein 5) (RanBP5)                                                                                                                                                                                                                  | Ipo5 (Kpnb3) (Ranbp5)            | 185  | 91   | 12  | 13  |
| P08113 | Endoplasmic reticulum chaperone protein (Heat shock protein 90 kDa beta member 1) (94 kDa glucose-regulated protein) (GRP94) (ERP99) (Polymorphic tumor rejection antigen 1) (Tumor rejection antigen gp96)                                                                                                        | Hsp90b1 (Tra-1) (Tra1)           | 221  | 298  | 25  | 27  |
| P16858 | Glyceraldehyde-3-phosphate dehydrogenase (GAPDH) (EC 1.2.1.12)                                                                                                                                                                                                                                                     | Gapdh (Gapd)                     | 1514 | 1781 | 84  | 89  |
| P62242 | 40S ribosomal protein S8                                                                                                                                                                                                                                                                                           | Rps8                             | 479  | 372  | 18  | 19  |
| P62281 | 40S ribosomal protein S11                                                                                                                                                                                                                                                                                          | Rps11                            | 166  | 132  | 27  | 28  |



|        |                                                                                                                                                                                             |                                    |      |      |     |     |
|--------|---------------------------------------------------------------------------------------------------------------------------------------------------------------------------------------------|------------------------------------|------|------|-----|-----|
| Q9DB77 | Cytochrome b-c1 complex subunit 2, mitochondrial (Ubiquinol-cytochrome-c reductase complex core protein 2) (Core protein II) (Complex III subunit 2)                                        | Uqcrc2                             | 29   | 20   | 13  | 13  |
| Q8R4K2 | Interleukin-1 receptor-associated kinase 4 (IRAK-4) (EC 2.7.11.1)                                                                                                                           | Irak4                              | 32   | 47   | 22  | 22  |
| Q9QYX7 | Protein piccolo (Aczonin) (Multidomain presynaptic cytomatrix protein) (Brain-derived HLMN protein)                                                                                         | Pclo (Acz)                         | 101  | 117  | 114 | 114 |
| P11499 | Heat shock protein HSP 90-beta (HSP 84) (Tumor-specific transplantation 84 kDa antigen) (TSTA)                                                                                              | Hsp90ab1 (Hsp84) (Hsp84-1) (Hspcb) | 2943 | 3523 | 208 | 205 |
| P58252 | Elongation factor 2 (EF-2)                                                                                                                                                                  | Eef2                               | 1630 | 1718 | 128 | 126 |
| P23116 | Eukaryotic translation initiation factor 3 subunit A (eIF3a) (Eukaryotic translation initiation factor 3 subunit 10) (eIF-3-theta) (eIF3 p167) (eIF3 p180) (eIF3 p185) (p162) (Centrosomin) | Eif3a (CsmA) (Eif3) (Eif3s10)      | 199  | 166  | 58  | 56  |
| Q8R1B4 | Eukaryotic translation initiation factor 3 subunit C (eIF3c) (Eukaryotic translation initiation factor 3 subunit 8) (eIF3 p110)                                                             | Eif3c (Eif3s8)                     | 34   | 63   | 22  | 21  |
| P30275 | Creatine kinase, ubiquitous mitochondrial (EC 2.7.3.2) (U-MtCK) (Acidic-type mitochondrial creatine kinase) (Mia-CK)                                                                        | Ckmt1                              | 205  | 121  | 32  | 30  |
| Q8BTI8 | Serine/arginine repetitive matrix protein 2                                                                                                                                                 | Srrm2 (Kiaa0324)                   | 78   | 70   | 92  | 86  |
| Q99PF4 | Cadherin-23 (Otocadherin)                                                                                                                                                                   | Cdh23                              | 29   | 32   | 29  | 27  |
| P35969 | Vascular endothelial growth factor receptor 1 (VEGFR-1) (EC 2.7.10.1) (Tyrosine-protein kinase receptor FLT) (FLT-1) (Embryonic receptor kinase 2)                                          | Flt1 (Emrk2) (Flt)                 | 29   | 36   | 35  | 32  |
| Q01853 | Transitional endoplasmic reticulum ATPase (TER ATPase) (15S Mg(2+)-ATPase p97 subunit) (Valosin-containing protein) (VCP)                                                                   | Vcp                                | 691  | 699  | 56  | 51  |

|        |                                                                                                                                                                                                   |                   |     |     |    |    |
|--------|---------------------------------------------------------------------------------------------------------------------------------------------------------------------------------------------------|-------------------|-----|-----|----|----|
| Q8CGC7 | Bifunctional aminoacyl-tRNA synthetase [Includes: Glutamyl-tRNA synthetase (EC 6.1.1.17) (Glutamate--tRNA ligase); Prolyl-tRNA synthetase (EC 6.1.1.15) (Proline--tRNA ligase)]                   | Eprs (Qprs)       | 130 | 102 | 32 | 29 |
| Q68FD5 | Clathrin heavy chain 1                                                                                                                                                                            | Cltc              | 944 | 884 | 88 | 78 |
| Q8VHE6 | Dynein heavy chain 5, axonemal (Axonemal beta dynein heavy chain 5) (Mdnah5) (Ciliary dynein heavy chain 5)                                                                                       | Dnah5 (Dnahc5)    | 47  | 44  | 83 | 72 |
| Q9JJK8 | Serine/threonine-protein kinase ATR (EC 2.7.11.1) (Ataxia telangiectasia and Rad3-related protein)                                                                                                | Atr               | 20  | 25  | 72 | 62 |
| O54749 | Cytochrome P450 2J5 (EC 1.14.14.1) (CYP11J5) (Arachidonic acid epoxygenase)                                                                                                                       | Cyp2j5            | 29  | 34  | 7  | 6  |
| Q9D868 | Peptidyl-prolyl cis-trans isomerase H (PPIase H) (Rotamase H) (EC 5.2.1.8)                                                                                                                        | Ppih              | 55  | 31  | 7  | 6  |
| P67984 | 60S ribosomal protein L22 (Heparin-binding protein HBp15)                                                                                                                                         | Rpl22             | 59  | 48  | 7  | 6  |
| P35979 | 60S ribosomal protein L12                                                                                                                                                                         | Rpl12             | 208 | 389 | 14 | 12 |
| Q9CZM2 | 60S ribosomal protein L15                                                                                                                                                                         | Rpl15             | 225 | 107 | 21 | 18 |
| Q6ZWN5 | 40S ribosomal protein S9                                                                                                                                                                          | Rps9              | 459 | 248 | 47 | 40 |
| P14131 | 40S ribosomal protein S16                                                                                                                                                                         | Rps16             | 160 | 126 | 19 | 16 |
| Q80TB8 | Probable oxidoreductase KIAA1576 (EC 1.-.-.-)                                                                                                                                                     | Kiaa1576          | 25  | 14  | 25 | 21 |
| Q9ES17 | Interleukin-21 (IL-21)                                                                                                                                                                            | Il21              | 22  | 25  | 6  | 5  |
| P46664 | Adenylosuccinate synthetase isozyme 2 (AMPSase 2) (AdSS 2) (EC 6.3.4.4) (Adenylosuccinate synthetase, non-muscle isozyme) (Adenylosuccinate synthetase, acidic isozyme) (IMP--aspartate ligase 2) | Adss (Adss2)      | 36  | 66  | 12 | 10 |
| Q99PP7 | E3 ubiquitin-protein ligase TRIM33 (EC 6.3.2.-) (Tripartite motif-containing protein 33) (Transcription intermediary factor 1-gamma) (TIF1-gamma) (Ectodermin homolog)                            | Trim33 (Kiaa1113) | 33  | 25  | 12 | 10 |

|        |                                                                                                                                                                                                                                                                                                                                                                                                                                                                         |                                 |      |      |     |     |
|--------|-------------------------------------------------------------------------------------------------------------------------------------------------------------------------------------------------------------------------------------------------------------------------------------------------------------------------------------------------------------------------------------------------------------------------------------------------------------------------|---------------------------------|------|------|-----|-----|
| Q91XQ0 | Dynein heavy chain 8, axonemal (Axonemal beta dynein heavy chain 8) (Ciliary dynein heavy chain 8)                                                                                                                                                                                                                                                                                                                                                                      | Dnahc8                          | 47   | 51   | 77  | 64  |
| P19096 | Fatty acid synthase (EC 2.3.1.85) [Includes: [Acyl-carrier-protein] S-acetyltransferase (EC 2.3.1.38); [Acyl-carrier-protein] S-malonyltransferase (EC 2.3.1.39); 3-oxoacyl-[acyl-carrier-protein] synthase (EC 2.3.1.41); 3-oxoacyl-[acyl-carrier-protein] reductase (EC 1.1.1.100); 3-hydroxypalmitoyl-[acyl-carrier-protein] dehydratase (EC 4.2.1.61); Enoyl-[acyl-carrier-protein] reductase (EC 1.3.1.10); Oleoyl [acyl-carrier-protein] hydrolase (EC 3.1.2.14)] | Fasn                            | 1869 | 1524 | 163 | 135 |
| P14206 | 40S ribosomal protein SA (Laminin receptor 1) (p40) (34/67 kDa laminin receptor) (37 kDa oncofetal antigen) (OFA/iLRP)                                                                                                                                                                                                                                                                                                                                                  | Rpsa (Lamr1) (P40-8)            | 131  | 112  | 11  | 9   |
| P12970 | 60S ribosomal protein L7a (Surfeit locus protein 3)                                                                                                                                                                                                                                                                                                                                                                                                                     | Rpl7a (Surf-3) (Surf3)          | 111  | 31   | 15  | 12  |
| P62852 | 40S ribosomal protein S25                                                                                                                                                                                                                                                                                                                                                                                                                                               | Rps25                           | 101  | 100  | 15  | 12  |
| Q8BP67 | 60S ribosomal protein L24                                                                                                                                                                                                                                                                                                                                                                                                                                               | Rpl24                           | 354  | 214  | 24  | 19  |
| P62754 | 40S ribosomal protein S6 (Phosphoprotein NP33)                                                                                                                                                                                                                                                                                                                                                                                                                          | Rps6                            | 127  | 283  | 19  | 15  |
| P63325 | 40S ribosomal protein S10                                                                                                                                                                                                                                                                                                                                                                                                                                               | Rps10                           | 468  | 168  | 42  | 33  |
| P62702 | 40S ribosomal protein S4, X isoform                                                                                                                                                                                                                                                                                                                                                                                                                                     | Rps4x (Rps4)                    | 402  | 304  | 30  | 23  |
| P97434 | Myosin phosphatase Rho-interacting protein (Rho-interacting protein 3) (RIP3) (p116Rip)                                                                                                                                                                                                                                                                                                                                                                                 | Mrip (Kiaa0864) (Mrip) (Rhoip3) | 35   | 23   | 25  | 19  |
| P70670 | Nascent polypeptide-associated complex subunit alpha, muscle-specific form (Alpha-NAC, muscle-specific form)                                                                                                                                                                                                                                                                                                                                                            | Naca (Gm1878)                   | 22   | 130  | 29  | 22  |
| Q9QYB1 | Chloride intracellular channel protein 4 (mc3s5/mtCLIC)                                                                                                                                                                                                                                                                                                                                                                                                                 | Clic4                           | 28   | 33   | 4   | 3   |

|        |                                                                                                                                                                                                                                                                                                        |                                    |      |      |     |     |
|--------|--------------------------------------------------------------------------------------------------------------------------------------------------------------------------------------------------------------------------------------------------------------------------------------------------------|------------------------------------|------|------|-----|-----|
| Q02956 | Protein kinase C zeta type (EC 2.7.11.13) (nPKC-zeta)                                                                                                                                                                                                                                                  | Prkcz (PkcZ)                       | 29   | 15   | 8   | 6   |
| P62751 | 60S ribosomal protein L23a                                                                                                                                                                                                                                                                             | Rpl23a                             | 75   | 49   | 16  | 12  |
| P60710 | Actin, cytoplasmic 1 (Beta-actin)                                                                                                                                                                                                                                                                      | Actb                               | 5140 | 4496 | 282 | 208 |
| Q8CDN8 | Coiled-coil domain-containing protein 38                                                                                                                                                                                                                                                               | Ccdc38                             | 45   | 95   | 15  | 11  |
| P62264 | 40S ribosomal protein S14                                                                                                                                                                                                                                                                              | Rps14                              | 163  | 166  | 15  | 11  |
| P25444 | 40S ribosomal protein S2 (S4) (LLRep3 protein)                                                                                                                                                                                                                                                         | Rps2 (Llrep3) (Rps4)               | 217  | 50   | 26  | 19  |
| Q9CR57 | 60S ribosomal protein L14                                                                                                                                                                                                                                                                              | Rpl14                              | 508  | 391  | 33  | 24  |
| P27659 | 60S ribosomal protein L3 (J1 protein)                                                                                                                                                                                                                                                                  | Rpl3                               | 192  | 75   | 25  | 18  |
| P14148 | 60S ribosomal protein L7                                                                                                                                                                                                                                                                               | Rpl7                               | 145  | 52   | 14  | 10  |
| P14869 | 60S acidic ribosomal protein P0 (L10E)                                                                                                                                                                                                                                                                 | Rplp0 (Arbp)                       | 115  | 334  | 28  | 20  |
| P51410 | 60S ribosomal protein L9                                                                                                                                                                                                                                                                               | Rpl9                               | 187  | 212  | 17  | 12  |
| Q91YJ5 | Translation initiation factor IF-2, mitochondrial (IF-2Mt) (IF2(mt)) (IF-2(Mt))                                                                                                                                                                                                                        | Mtif2                              | 29   | 23   | 13  | 9   |
| P99024 | Tubulin beta-5 chain                                                                                                                                                                                                                                                                                   | Tubb5                              | 1377 | 976  | 88  | 60  |
| P68033 | Actin, alpha cardiac muscle 1 (Alpha-cardiac actin)                                                                                                                                                                                                                                                    | Actc1 (Actc)                       | 3948 | 2726 | 234 | 155 |
| P42932 | T-complex protein 1 subunit theta (TCP-1-theta) (CCT-theta)                                                                                                                                                                                                                                            | Cct8 (Cctq)                        | 197  | 57   | 23  | 15  |
| P40142 | Transketolase (TK) (EC 2.2.1.1) (P68)                                                                                                                                                                                                                                                                  | Tkt                                | 562  | 250  | 117 | 75  |
| Q9CXW4 | 60S ribosomal protein L11                                                                                                                                                                                                                                                                              | Rpl11                              | 72   | 79   | 11  | 7   |
| Q61983 | Sodium-dependent phosphate transport protein 1 (Sodium/phosphate cotransporter 1) (Na(+)/Pi cotransporter 1) (Solute carrier family 17 member 1) (Renal sodium-dependent phosphate transport protein 1) (Renal sodium-phosphate transport protein 1) (Renal Na(+)-dependent phosphate cotransporter 1) | Slc17a1 (Npt1)                     | 31   | 33   | 8   | 5   |
| P62717 | 60S ribosomal protein L18a                                                                                                                                                                                                                                                                             | Rpl18a                             | 242  | 62   | 21  | 13  |
| P84099 | 60S ribosomal protein L19                                                                                                                                                                                                                                                                              | Rpl19                              | 39   | 47   | 13  | 8   |
| O35551 | Rab GTPase-binding effector protein 1 (Rabaptin-5) (Rabaptin-5alpha)                                                                                                                                                                                                                                   | Rabep1 (Rab5ep) (Rabpt5) (Rabpt5a) | 33   | 26   | 26  | 16  |

|               |        |                                                                                                                                   |                             |      |     |     |    |
|---------------|--------|-----------------------------------------------------------------------------------------------------------------------------------|-----------------------------|------|-----|-----|----|
|               | P62301 | 40S ribosomal protein S13                                                                                                         | Rps13                       | 77   | 100 | 23  | 14 |
|               | O35344 | Importin subunit alpha-3 (Karyopherin subunit alpha-3) (Importin alpha Q2) (Qip2)                                                 | Kpna3 (Qip2)                | 24   | 28  | 10  | 6  |
|               | Q9D1R9 | 60S ribosomal protein L34                                                                                                         | Rpl34                       | 34   | 32  | 10  | 6  |
|               | Q6NZJ6 | Eukaryotic translation initiation factor 4 gamma 1 (eIF-4-gamma 1) (eIF-4G 1) (eIF-4G1)                                           | Eif4g1                      | 47   | 113 | 30  | 18 |
|               | P80317 | T-complex protein 1 subunit zeta (TCP-1-zeta) (CCT-zeta) (CCT-zeta-1)                                                             | Cct6a (Cct6) (Cctz) (Cctz1) | 160  | 52  | 22  | 13 |
|               | P10630 | Eukaryotic initiation factor 4A-II (eIF-4A-II) (eIF4A-II) (EC 3.6.1.-) (ATP-dependent RNA helicase eIF4A-2)                       | Eif4a2 (Ddx2b)              | 194  | 78  | 17  | 10 |
|               | P63017 | Heat shock cognate 71 kDa protein (Heat shock 70 kDa protein 8)                                                                   | Hspa8 (Hsc70) (Hsc73)       | 1719 | 959 | 119 | 70 |
|               | P62900 | 60S ribosomal protein L31                                                                                                         | Rpl31                       | 124  | 62  | 12  | 7  |
|               | P41105 | 60S ribosomal protein L28                                                                                                         | Rpl28                       | 49   | 41  | 19  | 11 |
|               | Q9CZX8 | 40S ribosomal protein S19                                                                                                         | Rps19                       | 206  | 146 | 19  | 11 |
|               | P47963 | 60S ribosomal protein L13 (A52)                                                                                                   | Rpl13                       | 744  | 379 | 47  | 27 |
|               | Q8K2A7 | Integrator complex subunit 10 (Int10)                                                                                             | Ints10                      | 32   | 47  | 21  | 12 |
|               | P97461 | 40S ribosomal protein S5                                                                                                          | Rps5                        | 89   | 33  | 32  | 18 |
|               | P63073 | Eukaryotic translation initiation factor 4E (eIF-4E) (eIF4E) (mRNA cap-binding protein) (eIF-4F 25 kDa subunit)                   | Eif4e                       | 110  | 25  | 9   | 5  |
|               | O35664 | Interferon-alpha/beta receptor beta chain (Interferon alpha/beta receptor 2) (IFN-alpha-REC) (Type I interferon receptor) (IFN-R) | Ifnar2                      | 37   | 21  | 11  | 6  |
|               | Q9WUJ8 | Origin recognition complex subunit 6                                                                                              | Orc6l (Orc6)                | 59   | 37  | 13  | 7  |
|               | P97351 | 40S ribosomal protein S3a                                                                                                         | Rps3a                       | 899  | 392 | 50  | 26 |
| Ion transport | P97311 | DNA replication licensing factor MCM6 (Mis5 homolog)                                                                              | Mcm6 (Mcmd6) (Mis5)         | 110  | 395 | 20  | 38 |

|        |                                                                                                                                                        |                         |      |      |     |     |
|--------|--------------------------------------------------------------------------------------------------------------------------------------------------------|-------------------------|------|------|-----|-----|
| O88705 | Potassium/sodium hyperpolarization-activated cyclic nucleotide-gated channel 3 (Hyperpolarization-activated cation channel 3) (HAC-3)                  | Hcn3 (Hac3)             | 75   | 67   | 8   | 15  |
| P63143 | Voltage-gated potassium channel subunit beta-1 (K(+)-channel subunit beta-1) (Kv-beta-1)                                                               | Kcnab1 (Kvb1)           | 29   | 76   | 12  | 20  |
| Q62522 | Zona pellucida-binding protein 1 (Sp38)                                                                                                                | Zpbp (Zbp1)             | 38   | 42   | 8   | 12  |
| Q9QZ39 | Alpha-N-acetylgalactosaminide alpha-2,6-sialyltransferase 1 (EC 2.4.99.3) (GalNAc alpha-2,6-sialyltransferase I) (ST6GalNAc I) (Sialyltransferase 7A)  | St6galnac1 (Siat7a)     | 27   | 18   | 11  | 16  |
| Q61846 | Maternal embryonic leucine zipper kinase (EC 2.7.11.1) (Protein kinase PK38) (mPK38)                                                                   | Melk (Kiaa0175) (Pk38)  | 28   | 32   | 10  | 13  |
| P20152 | Vimentin                                                                                                                                               | Vim                     | 1749 | 2397 | 125 | 157 |
| O08648 | Mitogen-activated protein kinase kinase kinase 4 (EC 2.7.11.25) (MAPK/ERK kinase kinase 4) (MEK kinase 4) (MEKK 4)                                     | Map3k4 (Mekk4)          | 37   | 16   | 19  | 23  |
| Q9R0K7 | Plasma membrane calcium-transporting ATPase 2 (PMCA2) (EC 3.6.3.8) (Plasma membrane calcium ATPase isoform 2) (Plasma membrane calcium pump isoform 2) | Atp2b2 (Pmca2)          | 32   | 27   | 70  | 83  |
| Q9WUM4 | Coronin-1C (Coronin-3)                                                                                                                                 | Coro1c                  | 42   | 28   | 18  | 21  |
| P49718 | DNA replication licensing factor MCM5 (CDC46 homolog) (P1-CDC46)                                                                                       | Mcm5 (Cdc46) (Mcmd5)    | 40   | 20   | 18  | 21  |
| P48754 | Breast cancer type 1 susceptibility protein homolog                                                                                                    | Brca1                   | 28   | 25   | 26  | 30  |
| P55200 | Histone-lysine N-methyltransferase HRX (EC 2.1.1.43) (Zinc finger protein HRX) (ALL-1)                                                                 | Mll (All1) (Hrx) (Mll1) | 67   | 26   | 39  | 44  |
| Q9CQV8 | 14-3-3 protein beta/alpha (Protein kinase C inhibitor protein 1) (KCIP-1)                                                                              | Ywhab                   | 983  | 971  | 71  | 80  |

|        |                                                                                                                                                                                                                                       |                                    |      |      |     |     |
|--------|---------------------------------------------------------------------------------------------------------------------------------------------------------------------------------------------------------------------------------------|------------------------------------|------|------|-----|-----|
| P40124 | Adenylyl cyclase-associated protein 1 (CAP 1)                                                                                                                                                                                         | Cap1 (Cap)                         | 22   | 43   | 8   | 9   |
| Q9WUU9 | 80 kDa MCM3-associated protein (Protein GANP)                                                                                                                                                                                         | Mcm3ap (Ganp) (Map80)              | 48   | 32   | 17  | 19  |
| P41230 | Histone demethylase JARID1C (EC 1.14.11.-) (Jumonji/ARID domain-containing protein 1C) (Protein SmcX) (Protein Xe169)                                                                                                                 | Jarid1c (Kiaa0234) (Smcx) (Xe169)  | 34   | 32   | 26  | 29  |
| Q62446 | FK506-binding protein 3 (EC 5.2.1.8) (Peptidyl-prolyl cis-trans isomerase) (PPIase) (Rotamase) (25 kDa FKBP) (FKBP-25) (Rapamycin-selective 25 kDa immunophilin)                                                                      | Fkbp3 (Fkbp25)                     | 31   | 31   | 10  | 11  |
| Q9ET77 | Junctophilin-3 (Junctophilin type 3) (JP-3)                                                                                                                                                                                           | Jph3 (Jp3)                         | 37   | 31   | 20  | 22  |
| P49717 | DNA replication licensing factor MCM4 (CDC21 homolog) (P1-CDC21)                                                                                                                                                                      | Mcm4 (Cdc21) (Mcmd4)               | 29   | 18   | 11  | 12  |
| P07901 | Heat shock protein HSP 90-alpha (HSP 86) (Tumor-specific transplantation 86 kDa antigen) (TSTA)                                                                                                                                       | Hsp90aa1 (Hsp86) (Hsp86-1) (Hspca) | 1529 | 2324 | 134 | 146 |
| P70298 | Homeobox protein cut-like 2 (Cut-like 2) (Homeobox protein Cux-2)                                                                                                                                                                     | Cux2 (Cutl2)                       | 30   | 22   | 12  | 13  |
| Q9Z104 | SWI/SNF-related matrix-associated actin-dependent regulator of chromatin subfamily E member 1-related (SMARCE1-related protein) (HMG box-containing protein 20B) (Structural DNA-binding protein BRAF35) (BRCA2-associated factor 35) | Hmg20b (Braf35) (Hmgx2) (Smarce1r) | 30   | 20   | 14  | 15  |
| P11984 | T-complex protein 1 subunit alpha A (TCP-1-alpha) (CCT-alpha) (Tailless complex polypeptide 1A) (TCP-1-A)                                                                                                                             | Cct1 (Ccta) (Tcp1)                 | 29   | 66   | 14  | 15  |

|        |                                                                                                                                                                                                        |                     |     |     |    |    |
|--------|--------------------------------------------------------------------------------------------------------------------------------------------------------------------------------------------------------|---------------------|-----|-----|----|----|
| O35973 | Period circadian protein homolog 1 (Circadian clock protein PERIOD 1) (Circadian pacemaker protein Rigui) (mPER1)                                                                                      | Per1 (Per) (Rigui)  | 29  | 21  | 27 | 28 |
| P30416 | FK506-binding protein 4 (EC 5.2.1.8) (Peptidyl-prolyl cis-trans isomerase) (PPlase) (Rotamase) (HSP-binding immunophilin) (HBI) (FKBP52 protein) (52 kDa FK506-binding protein) (FKBP59) (p59 protein) | Fkbp4               | 40  | 62  | 8  | 8  |
| Q99LX0 | Protein DJ-1 (Parkinson disease protein 7 homolog)                                                                                                                                                     | Park7               | 53  | 178 | 9  | 9  |
| Q9D289 | Trafficking protein particle complex subunit 6B                                                                                                                                                        | Trappc6b            | 62  | 69  | 9  | 9  |
| Q9WV80 | Sorting nexin-1                                                                                                                                                                                        | Snx1                | 23  | 49  | 11 | 11 |
| P25206 | DNA replication licensing factor MCM3 (DNA polymerase alpha holoenzyme-associated protein P1) (P1-MCM3)                                                                                                | Mcm3 (Mcmd) (Mcmd3) | 74  | 185 | 15 | 15 |
| Q8BSS9 | Liprin-alpha-2 (Protein tyrosine phosphatase receptor type f polypeptide-interacting protein alpha-2) (PTPRF-interacting protein alpha-2)                                                              | Ppfia2              | 36  | 21  | 22 | 22 |
| Q6P8J7 | Creatine kinase, sarcomeric mitochondrial (EC 2.7.3.2) (S-MtCK)                                                                                                                                        | Ckmt2               | 50  | 66  | 26 | 26 |
| Q91YE5 | Bromodomain adjacent to zinc finger domain protein 2A (Transcription termination factor I-interacting protein 5) (TTF-I-interacting protein 5) (Tip5)                                                  | Baz2a (Tip5)        | 36  | 15  | 56 | 55 |
| Q9QXL1 | Kinesin-like protein KIF21B (Kinesin-like protein KIF6)                                                                                                                                                | Kif21b (Kif6)       | 22  | 45  | 26 | 25 |
| Q91V92 | ATP-citrate synthase (EC 2.3.3.8) (ATP-citrate (pro-S)-lyase) (Citrate cleavage enzyme)                                                                                                                | Acly                | 349 | 488 | 45 | 43 |
| P30275 | Creatine kinase, ubiquitous mitochondrial (EC 2.7.3.2) (U-MtCK) (Acidic-type mitochondrial creatine kinase) (Mia-CK)                                                                                   | Ckmt1               | 205 | 121 | 32 | 30 |



|        |                                                                                                                                                                                                                     |                                    |      |      |     |     |
|--------|---------------------------------------------------------------------------------------------------------------------------------------------------------------------------------------------------------------------|------------------------------------|------|------|-----|-----|
| Q04447 | Creatine kinase B-type (EC 2.7.3.2) (Creatine kinase B chain) (B-CK)                                                                                                                                                | Ckb (Ckbb)                         | 9079 | 7277 | 434 | 406 |
| Q7TMY8 | E3 ubiquitin-protein ligase HUWE1 (EC 6.3.2.-) (HECT, UBA and WWE domain-containing protein 1) (Upstream regulatory element-binding protein 1) (URE-binding protein 1) (URE-B1) (E3Histone)                         | Huwe1 (Kiaa0312) (Ureb1)           | 33   | 91   | 39  | 36  |
| Q01853 | Transitional endoplasmic reticulum ATPase (TER ATPase) (15S Mg(2+)-ATPase p97 subunit) (Valosin-containing protein) (VCP)                                                                                           | Vcp                                | 691  | 699  | 56  | 51  |
| Q8VDD5 | Myosin-9 (Myosin heavy chain 9) (Myosin heavy chain, non-muscle IIa) (Non-muscle myosin heavy chain IIa) (NMMHC II-a) (NMMHC-IIA) (Cellular myosin heavy chain, type A) (Non-muscle myosin heavy chain-A) (NMMHC-A) | Myh9                               | 780  | 839  | 127 | 115 |
| P07310 | Creatine kinase M-type (EC 2.7.3.2) (Creatine kinase M chain) (M-CK)                                                                                                                                                | Ckm (Ckmm)                         | 73   | 107  | 31  | 28  |
| Q02053 | Ubiquitin-like modifier-activating enzyme 1 (Ubiquitin-activating enzyme E1) (Ubiquitin-like modifier-activating enzyme 1 X) (Ubiquitin-activating enzyme E1 X)                                                     | Uba1 (Sbx) (Ube1) (Ube1ax) (Ube1x) | 660  | 1086 | 63  | 55  |
| Q9JM52 | Misshapen-like kinase 1 (EC 2.7.11.1) (Mitogen-activated protein kinase kinase kinase 6) (MAPK/ERK kinase kinase 6) (MEK kinase kinase 6) (MEKKK 6) (Misshapen/NIK-related kinase) (GCK family kinase MiNK)         | Mink1 (Map4k6) (Mink)              | 18   | 54   | 13  | 11  |
| Q9R0L6 | Pericentriolar material 1 protein (PCM-1) (mPCM-1)                                                                                                                                                                  | Pcm1                               | 24   | 30   | 19  | 16  |
| P20029 | 78 kDa glucose-regulated protein (GRP 78) (Heat shock 70 kDa protein 5) (Immunoglobulin heavy chain-binding protein) (BiP)                                                                                          | Hspa5 (Grp78)                      | 262  | 312  | 25  | 21  |

|        |                                                                                                                                                                                                                                                                |                                 |     |     |     |     |
|--------|----------------------------------------------------------------------------------------------------------------------------------------------------------------------------------------------------------------------------------------------------------------|---------------------------------|-----|-----|-----|-----|
| P11983 | T-complex protein 1 subunit alpha B (TCP-1-alpha) (CCT-alpha) (Tailless complex polypeptide 1B) (TCP-1-B)                                                                                                                                                      | Cct1 (Ccta) (Tcp1)              | 29  | 66  | 18  | 15  |
| P11531 | Dystrophin                                                                                                                                                                                                                                                     | Dmd                             | 25  | 16  | 66  | 55  |
| Q8R429 | Sarcoplasmic/endoplasmic reticulum calcium ATPase 1 (SERCA1) (EC 3.6.3.8) (Calcium pump 1) (Calcium-transporting ATPase sarcoplasmic reticulum type, fast twitch skeletal muscle isoform) (SR Ca(2+)-ATPase 1) (Endoplasmic reticulum class 1/2 Ca(2+) ATPase) | Atp2a1                          | 25  | 17  | 17  | 14  |
| P80316 | T-complex protein 1 subunit epsilon (TCP-1-epsilon) (CCT-epsilon)                                                                                                                                                                                              | Cct5 (Ccte) (Kiaa0098)          | 239 | 102 | 17  | 14  |
| Q6DFV7 | Nuclear receptor coactivator 7                                                                                                                                                                                                                                 | Ncoa7                           | 25  | 16  | 11  | 9   |
| Q80ZW0 | Serine/threonine-protein kinase 35 (EC 2.7.11.1)                                                                                                                                                                                                               | Stk35                           | 14  | 50  | 21  | 17  |
| P54923 | [Protein ADP-ribosylarginine] hydrolase (ADP-ribosylarginine hydrolase) (EC 3.2.2.19) (ADP-ribose-L-arginine cleaving enzyme)                                                                                                                                  | Adprh (Arh1)                    | 20  | 41  | 15  | 12  |
| Q91ZU6 | Bullous pemphigoid antigen 1, isoforms 1/2/3/4 (BPA) (Hemidesmosomal plaque protein) (Dystonia musculorum protein) (Dystonin)                                                                                                                                  | Dst (Bpag1)                     | 78  | 38  | 126 | 100 |
| P62754 | 40S ribosomal protein S6 (Phosphoprotein NP33)                                                                                                                                                                                                                 | Rps6                            | 127 | 283 | 19  | 15  |
| Q8VHK5 | Membrane protein MLC1                                                                                                                                                                                                                                          | Mlc1                            | 35  | 25  | 22  | 17  |
| P31254 | Ubiquitin-like modifier-activating enzyme 1 Y (Ubiquitin-activating enzyme E1 Y) (Ubiquitin-activating enzyme E1)                                                                                                                                              | Ube1ay (Sby) (Ube1y) (Ube1y1)   | 161 | 77  | 22  | 17  |
| P97434 | Myosin phosphatase Rho-interacting protein (Rho-interacting protein 3) (RIP3) (p116Rip)                                                                                                                                                                        | Mrip (Kiaa0864) (Mrip) (Rhoip3) | 35  | 23  | 25  | 19  |

|        |                                                                                                                                               |                              |      |      |     |     |
|--------|-----------------------------------------------------------------------------------------------------------------------------------------------|------------------------------|------|------|-----|-----|
| P16627 | Heat shock 70 kDa protein 1L (Heat shock 70 kDa protein 1-like) (Heat shock 70 kDa-like protein 1) (Spermatid-specific heat shock protein 70) | Hspa1l (Hsc70t)              | 319  | 238  | 33  | 25  |
| O70228 | Probable phospholipid-transporting ATPase IIA (EC 3.6.3.1) (ATPase class II type 9A)                                                          | Atp9a                        | 31   | 29   | 37  | 28  |
| Q4VGL6 | Roquin (RING finger and C3H zinc finger protein 1) (Protein Sanroque)                                                                         | Rc3h1 (Gm551) (Kiaa2025)     | 54   | 54   | 23  | 17  |
| P60710 | Actin, cytoplasmic 1 (Beta-actin)                                                                                                             | Actb                         | 5140 | 4496 | 282 | 208 |
| Q61656 | Probable ATP-dependent RNA helicase DDX5 (EC 3.6.1.-) (DEAD box protein 5) (RNA helicase p68) (DEAD box RNA helicase DEAD1) (mDEAD1)          | Ddx5 (Tnz2)                  | 90   | 43   | 11  | 8   |
| Q91Z67 | SLIT-ROBO Rho GTPase-activating protein 2 (srGAP2) (Formin-binding protein 2) (Formin-binding protein 27) (FBP-27)                            | Srgap2 (Fbp27) (Fnbp2)       | 77   | 48   | 11  | 8   |
| Q61696 | Heat shock 70 kDa protein 1A (Heat shock 70 kDa protein 3) (HSP70.3) (Hsp68)                                                                  | Hspa1a (Hsp70-3) (Hsp70A1)   | 266  | 236  | 33  | 24  |
| Q60673 | Receptor-type tyrosine-protein phosphatase-like N (R-PTP-N) (PTP IA-2)                                                                        | Ptprn (Ptp35)                | 30   | 18   | 14  | 10  |
| Q8CD91 | SPARC-related modular calcium-binding protein 2 (Secreted modular calcium-binding protein 2) (SMOC-2)                                         | Smoc2                        | 29   | 16   | 16  | 11  |
| P61979 | Heterogeneous nuclear ribonucleoprotein K (hnRNP K)                                                                                           | Hnrnpk (Hnrpk)               | 225  | 46   | 18  | 12  |
| Q9Z0T6 | Polycystic kidney disease and receptor for egg jelly-related protein (PKD and REJ homolog)                                                    | Pkdrej                       | 32   | 32   | 18  | 12  |
| P61161 | Actin-related protein 2 (Actin-like protein 2)                                                                                                | Actr2 (Arp2)                 | 247  | 124  | 28  | 18  |
| Q8CG48 | Structural maintenance of chromosomes protein 2 (Chromosome-associated protein E) (XCAP-E homolog) (FGF-inducible protein 16)                 | Smc2 (Cape) (Fin16) (Smc2l1) | 32   | 36   | 41  | 26  |

|                        |        |                                                                                                                                                                                                                                                                                                        |                                    |     |     |    |    |
|------------------------|--------|--------------------------------------------------------------------------------------------------------------------------------------------------------------------------------------------------------------------------------------------------------------------------------------------------------|------------------------------------|-----|-----|----|----|
|                        | Q61983 | Sodium-dependent phosphate transport protein 1 (Sodium/phosphate cotransporter 1) (Na(+)/PI cotransporter 1) (Solute carrier family 17 member 1) (Renal sodium-dependent phosphate transport protein 1) (Renal sodium-phosphate transport protein 1) (Renal Na(+)-dependent phosphate cotransporter 1) | Slc17a1 (Npt1)                     | 31  | 33  | 8  | 5  |
|                        | O35551 | Rab GTPase-binding effector protein 1 (Rabaptin-5) (Rabaptin-5alpha)                                                                                                                                                                                                                                   | Rabep1 (Rab5ep) (Rabpt5) (Rabpt5a) | 33  | 26  | 26 | 16 |
|                        | P63038 | 60 kDa heat shock protein, mitochondrial (Heat shock protein 60) (HSP-60) (Hsp60) (60 kDa chaperonin) (Chaperonin 60) (CPN60) (Mitochondrial matrix protein P1) (HSP-65)                                                                                                                               | Hspd1 (Hsp60)                      | 15  | 32  | 22 | 13 |
|                        | P05532 | Mast/stem cell growth factor receptor (SCFR) (EC 2.7.10.1) (Proto-oncogene tyrosine-protein kinase Kit) (c-kit) (CD antigen CD117)                                                                                                                                                                     | Kit (SI)                           | 16  | 35  | 12 | 7  |
|                        | Q9WTU3 | Sodium channel protein type 8 subunit alpha (Sodium channel protein type VIII subunit alpha) (Voltage-gated sodium channel subunit alpha Nav1.6)                                                                                                                                                       | Scn8a (Nbna1)                      | 28  | 19  | 20 | 11 |
|                        | O35664 | Interferon-alpha/beta receptor beta chain (Interferon alpha/beta receptor 2) (IFN-alpha-REC) (Type I interferon receptor) (IFN-R)                                                                                                                                                                      | Ifnar2                             | 37  | 21  | 11 | 6  |
|                        | Q9WUJ8 | Origin recognition complex subunit 6                                                                                                                                                                                                                                                                   | Orc6l (Orc6)                       | 59  | 37  | 13 | 7  |
| Induction of apoptosis | P56198 | Cell death activator CIDE-3 (Cell death-inducing DFFA-like effector protein C) (Fat-specific protein FSP27)                                                                                                                                                                                            | Cidec (Fsp27)                      | 51  | 39  | 8  | 14 |
|                        | Q80X90 | Filamin-B (FLN-B) (Beta-filamin) (Actin-binding like protein) (ABP-280-like protein)                                                                                                                                                                                                                   | Flnb                               | 63  | 279 | 32 | 41 |
|                        | Q61316 | Heat shock 70 kDa protein 4 (Heat shock 70-related protein APG-2)                                                                                                                                                                                                                                      | Hspa4 (Apg2) (Hsp110)              | 379 | 792 | 42 | 52 |

|                 |        |                                                                                                                                                                                                                                                                                                        |                                        |     |      |     |     |
|-----------------|--------|--------------------------------------------------------------------------------------------------------------------------------------------------------------------------------------------------------------------------------------------------------------------------------------------------------|----------------------------------------|-----|------|-----|-----|
|                 | Q61771 | Kinesin-like protein KIF3B (Microtubule plus end-directed kinesin motor 3B)                                                                                                                                                                                                                            | Kif3b                                  | 30  | 51   | 16  | 19  |
|                 | Q6P4S8 | Integrator complex subunit 1 (Int1)                                                                                                                                                                                                                                                                    | Ints1                                  | 25  | 33   | 26  | 27  |
|                 | Q8R4B8 | NACHT, LRR and PYD domains-containing protein 3 (Cold autoinflammatory syndrome 1 protein homolog) (Cryopyrin) (PYRIN-containing APAF1-like protein 1) (Mast cell maturation-associated-inducible protein 1)                                                                                           | Nlrp3 (Cias1) (Mmig1) (Nalp3) (Pypaf1) | 30  | 20   | 24  | 23  |
|                 | Q11011 | Puromycin-sensitive aminopeptidase (PSA) (EC 3.4.11.-)                                                                                                                                                                                                                                                 | Npepps (Psa)                           | 71  | 141  | 30  | 26  |
|                 | P11881 | Inositol 1,4,5-trisphosphate receptor type 1 (Type 1 inositol 1,4,5-trisphosphate receptor) (Type 1 InsP3 receptor) (IP3 receptor isoform 1) (InsP3R1) (Inositol 1,4,5-trisphosphate-binding protein P400) (Purkinje cell protein 1) (Protein PCD-6)                                                   | Itpr1 (Insp3r) (Pcd6) (Pcp1)           | 37  | 42   | 48  | 41  |
|                 | Q91ZU6 | Bullous pemphigoid antigen 1, isoforms 1/2/3/4 (BPA) (Hemidesmosomal plaque protein) (Dystonia musculorum protein) (Dystonin)                                                                                                                                                                          | Dst (Bpag1)                            | 78  | 38   | 126 | 100 |
|                 | Q8BX70 | Vacuolar protein sorting-associated protein 13C                                                                                                                                                                                                                                                        | Vps13c (Kiaa3021)                      | 25  | 17   | 53  | 38  |
|                 | P14869 | 60S acidic ribosomal protein P0 (L10E)                                                                                                                                                                                                                                                                 | Rplp0 (Arbp)                           | 115 | 334  | 28  | 20  |
|                 | Q61983 | Sodium-dependent phosphate transport protein 1 (Sodium/phosphate cotransporter 1) (Na(+)/PI cotransporter 1) (Solute carrier family 17 member 1) (Renal sodium-dependent phosphate transport protein 1) (Renal sodium-phosphate transport protein 1) (Renal Na(+)-dependent phosphate cotransporter 1) | Slc17a1 (Npt1)                         | 31  | 33   | 8   | 5   |
| Protein folding | P17742 | Peptidyl-prolyl cis-trans isomerase A (PPIase A) (Rotamase A) (EC 5.2.1.8) (Cyclophilin A) (Cyclosporin A-binding protein) (SP18)                                                                                                                                                                      | Ppia                                   | 855 | 1549 | 38  | 66  |

|        |                                                                                                                                                                  |                                   |     |     |    |    |
|--------|------------------------------------------------------------------------------------------------------------------------------------------------------------------|-----------------------------------|-----|-----|----|----|
| Q9R117 | Non-receptor tyrosine-protein kinase TYK2 (EC 2.7.10.2)                                                                                                          | Tyk2                              | 27  | 30  | 15 | 26 |
| Q8BFQ9 | Kelch domain-containing protein 5                                                                                                                                | Klhdc5 (Kiaa1340)                 | 30  | 22  | 10 | 17 |
| Q3UDW8 | Heparan-alpha-glucosaminide N-acetyltransferase (EC 2.3.1.78) (Transmembrane protein 76)                                                                         | Hgsnat (D8Ert354e) (Tmem76)       | 34  | 22  | 6  | 9  |
| P17047 | Lysosome-associated membrane glycoprotein 2 (LAMP-2) (Lysosomal membrane glycoprotein type B) (LGP-B) (CD107 antigen-like family member B) (CD antigen CD107b)   | Lamp2 (Lamp-2)                    | 26  | 29  | 8  | 11 |
| Q80X50 | Ubiquitin-associated protein 2-like                                                                                                                              | Ubap2l                            | 63  | 54  | 4  | 5  |
| Q61316 | Heat shock 70 kDa protein 4 (Heat shock 70-related protein APG-2)                                                                                                | Hspa4 (Apg2) (Hsp110)             | 379 | 792 | 42 | 52 |
| O08648 | Mitogen-activated protein kinase kinase kinase 4 (EC 2.7.11.25) (MAPK/ERK kinase kinase 4) (MEK kinase 4) (MEKK 4)                                               | Map3k4 (Mekk4)                    | 37  | 16  | 19 | 23 |
| P80315 | T-complex protein 1 subunit delta (TCP-1-delta) (CCT-delta) (A45)                                                                                                | Cct4 (Cctd)                       | 61  | 59  | 15 | 18 |
| P54103 | DnaJ homolog subfamily C member 2 (Zuotin-related factor 1) (Mouse Id associate 1) (MIDA1)                                                                       | Dnajc2 (Mida1) (Zrf1)             | 23  | 27  | 11 | 13 |
| P41230 | Histone demethylase JARID1C (EC 1.14.11.-) (Jumonji/ARID domain-containing protein 1C) (Protein SmcX) (Protein Xe169)                                            | Jarid1c (Kiaa0234) (Smcx) (Xe169) | 34  | 32  | 26 | 29 |
| Q91ZT5 | FYVE, RhoGEF and PH domain-containing protein 4 (Actin filament-binding protein frabin) (FGD1-related F-actin-binding protein)                                   | Fgd4                              | 29  | 19  | 10 | 11 |
| Q62446 | FK506-binding protein 3 (EC 5.2.1.8) (Peptidyl-prolyl cis-trans isomerase) (PPIase) (Rotamase) (25 kDa FKBP) (FKBP-25) (Rapamycin-selective 25 kDa immunophilin) | Fkbp3 (Fkbp25)                    | 31  | 31  | 10 | 11 |

|        |                                                                                                                                                                                                        |                                        |      |      |     |     |
|--------|--------------------------------------------------------------------------------------------------------------------------------------------------------------------------------------------------------|----------------------------------------|------|------|-----|-----|
| P07901 | Heat shock protein HSP 90-alpha (HSP 86) (Tumor-specific transplantation 86 kDa antigen) (TSTA)                                                                                                        | Hsp90aa1 (Hsp86) (Hsp86-1) (Hspca)     | 1529 | 2324 | 134 | 146 |
| P30416 | FK506-binding protein 4 (EC 5.2.1.8) (Peptidyl-prolyl cis-trans isomerase) (PPIase) (Rotamase) (HSP-binding immunophilin) (HBI) (FKBP52 protein) (52 kDa FK506-binding protein) (FKBP59) (p59 protein) | Fkbp4                                  | 40   | 62   | 8   | 8   |
| P11499 | Heat shock protein HSP 90-beta (HSP 84) (Tumor-specific transplantation 84 kDa antigen) (TSTA)                                                                                                         | Hsp90ab1 (Hsp84) (Hsp84-1) (Hspcb)     | 2943 | 3523 | 208 | 205 |
| P54869 | Hydroxymethylglutaryl-CoA synthase, mitochondrial (HMG-CoA synthase) (EC 2.3.3.10) (3-hydroxy-3-methylglutaryl coenzyme A synthase)                                                                    | Hmgcs2                                 | 26   | 23   | 18  | 17  |
| P35969 | Vascular endothelial growth factor receptor 1 (VEGFR-1) (EC 2.7.10.1) (Tyrosine-protein kinase receptor FLT) (FLT-1) (Embryonic receptor kinase 2)                                                     | Flt1 (Emrk2) (Flt)                     | 29   | 36   | 35  | 32  |
| O54749 | Cytochrome P450 2J5 (EC 1.14.14.1) (CYPIIJ5) (Arachidonic acid epoxygenase)                                                                                                                            | Cyp2j5                                 | 29   | 34   | 7   | 6   |
| Q9JHU4 | Cytoplasmic dynein 1 heavy chain 1 (Cytoplasmic dynein heavy chain 1) (Dynein heavy chain, cytosolic)                                                                                                  | Dync1h1 (Dhc1) (Dnch1) (Dnchc1) (Dyhc) | 822  | 395  | 157 | 123 |
| P16627 | Heat shock 70 kDa protein 1L (Heat shock 70 kDa protein 1-like) (Heat shock 70 kDa-like protein 1) (Spermatid-specific heat shock protein 70)                                                          | Hspa1l (Hsc70t)                        | 319  | 238  | 33  | 25  |
| P60710 | Actin, cytoplasmic 1 (Beta-actin)                                                                                                                                                                      | Actb                                   | 5140 | 4496 | 282 | 208 |

|                             |        |                                                                                                                                       |                                    |      |      |     |     |
|-----------------------------|--------|---------------------------------------------------------------------------------------------------------------------------------------|------------------------------------|------|------|-----|-----|
|                             | Q61696 | Heat shock 70 kDa protein 1A (Heat shock 70 kDa protein 3) (HSP70.3) (Hsp68)                                                          | Hspa1a (Hsp70-3) (Hsp70A1)         | 266  | 236  | 33  | 24  |
|                             | Q61699 | Heat shock protein 105 kDa (Heat shock-related 100 kDa protein E7I) (HSP-E7I) (Heat shock 110 kDa protein) (42 degrees C-HSP)         | Hsph1 (Hsp105) (Hsp110) (Kiaa0201) | 46   | 48   | 18  | 13  |
|                             | P17156 | Heat shock-related 70 kDa protein 2 (Heat shock protein 70.2)                                                                         | Hspa2 (Hcp70.2) (Hsp70-2)          | 964  | 544  | 60  | 37  |
|                             | P63017 | Heat shock cognate 71 kDa protein (Heat shock 70 kDa protein 8)                                                                       | Hspa8 (Hsc70) (Hsc73)              | 1719 | 959  | 119 | 70  |
|                             | P05532 | Mast/stem cell growth factor receptor (SCFR) (EC 2.7.10.1) (Proto-oncogene tyrosine-protein kinase Kit) (c-kit) (CD antigen CD117)    | Kit (SI)                           | 16   | 35   | 12  | 7   |
| Cell structure and motility | Q8BTM8 | Filamin-A (Alpha-filamin) (Filamin-1) (Endothelial actin-binding protein) (Actin-binding protein 280) (ABP-280) (Non-muscle filamin)  | Flna (Fln) (Fln1)                  | 254  | 1031 | 46  | 86  |
|                             | P06745 | Glucose-6-phosphate isomerase (GPI) (EC 5.3.1.9) (Phosphoglucose isomerase) (PGI) (Phosphohexose isomerase) (PHI) (Neuroleukin) (NLK) | Gpi (Gpi1)                         | 39   | 107  | 12  | 22  |
|                             | Q9CQE1 | Protein NipSnap homolog 3A (NipSnap3A) (NipSnap-related protein)                                                                      | Nipsnap3a (Nipsnap3b)              | 15   | 25   | 16  | 29  |
|                             | Q61414 | Keratin, type I cytoskeletal 15 (Cytokeratin-15) (CK-15) (Keratin-15) (K15)                                                           | Krt15 (Krt1-15)                    | 37   | 46   | 4   | 7   |
|                             | P18760 | Cofilin-1 (Cofilin, non-muscle isoform)                                                                                               | Cfl1                               | 959  | 2552 | 70  | 122 |
|                             | P63001 | Ras-related C3 botulinum toxin substrate 1 (p21-Rac1)                                                                                 | Rac1                               | 31   | 99   | 7   | 11  |
|                             | Q8CCP0 | Serologically defined colon cancer antigen 1 homolog                                                                                  | Sdccag1                            | 37   | 31   | 21  | 33  |



|        |                                                                                                                                                                         |                                  |     |     |    |    |
|--------|-------------------------------------------------------------------------------------------------------------------------------------------------------------------------|----------------------------------|-----|-----|----|----|
| P14824 | Annexin A6 (Annexin-6) (Annexin VI) (Lipocortin VI) (p68) (p70) (Protein III) (Chromobindin-20) (67 kDa calelectrin) (Calphobindin-II) (CPB-II)                         | Anxa6 (Anx6)                     | 168 | 591 | 33 | 51 |
| P63158 | High mobility group protein B1 (High mobility group protein 1) (HMG-1)                                                                                                  | Hmgb1 (Hmg-1) (Hmg1)             | 153 | 405 | 25 | 38 |
| P12813 | Nuclear receptor subfamily 4 group A member 1 (Orphan nuclear receptor HMR) (Nuclear hormone receptor NUR/77) (N10 nuclear protein)                                     | Nr4a1 (Gfrp) (Hmr) (N10) (Nur77) | 61  | 31  | 7  | 10 |
| Q8VHX6 | Filamin-C (Gamma-filamin) (Filamin-2) (FLN-C) (Actin-binding-like protein) (ABP-L) (ABP-280-like protein)                                                               | Finc (Abpl) (Fln2)               | 33  | 115 | 18 | 25 |
| Q61937 | Nucleophosmin (NPM) (Nucleolar phosphoprotein B23) (Numatrin) (Nucleolar protein NO38)                                                                                  | Npm1                             | 92  | 66  | 11 | 15 |
| Q61595 | Kinectin                                                                                                                                                                | Ktn1                             | 15  | 50  | 43 | 56 |
| P47753 | F-actin-capping protein subunit alpha-1 (CapZ alpha-1)                                                                                                                  | Capza1 (Cappa1)                  | 60  | 33  | 7  | 9  |
| Q80X90 | Filamin-B (FLN-B) (Beta-filamin) (Actin-binding-like protein) (ABP-280-like protein)                                                                                    | Flnb                             | 63  | 279 | 32 | 41 |
| Q91YK0 | Leucine-rich repeat-containing protein 49 (Tubulin polyglutamylase complex subunit 4) (PGs4) (p79)                                                                      | Lrrc49                           | 27  | 27  | 18 | 23 |
| Q63ZW7 | InaD-like protein (Inadl protein) (Pals1-associated tight junction protein) (Protein associated to tight junctions) (Channel-interacting PDZ domain-containing protein) | Inadl (Cipp) (Patj)              | 18  | 30  | 12 | 15 |
| Q3UKC1 | Tax1-binding protein 1 homolog                                                                                                                                          | Tax1bp1                          | 22  | 27  | 24 | 30 |
| Q80Z38 | SH3 and multiple ankyrin repeat domains protein 2 (Shank2) (Cortactin-binding protein 1) (CortBP1)                                                                      | Shank2 (Cortbp1) (Kiaa1022)      | 41  | 57  | 21 | 26 |
| P47754 | F-actin-capping protein subunit alpha-2 (CapZ alpha-2)                                                                                                                  | Capza2 (Cappa2)                  | 60  | 33  | 5  | 6  |

|        |                                                                                                              |                         |     |     |    |    |
|--------|--------------------------------------------------------------------------------------------------------------|-------------------------|-----|-----|----|----|
| P05784 | Keratin, type I cytoskeletal 18 (Cytokeratin-18) (CK-18) (Keratin-18) (K18) (Cytokeratin endo B) (Keratin D) | Krt18 (Kerd) (Krt1-18)  | 37  | 46  | 10 | 12 |
| Q60575 | Kinesin-like protein KIF1B                                                                                   | Kif1b                   | 45  | 95  | 30 | 36 |
| Q9JKF1 | Ras GTPase-activating-like protein IQGAP1                                                                    | Iqgap1                  | 19  | 81  | 21 | 25 |
| Q62418 | Drebrin-like protein (SH3 domain-containing protein 7) (Actin-binding protein 1)                             | Dbnl (Abp1) (Sh3p7)     | 24  | 39  | 7  | 8  |
| Q9Z2K1 | Keratin, type I cytoskeletal 16 (Cytokeratin-16) (CK-16) (Keratin-16) (K16)                                  | Krt16 (Krt1-16)         | 37  | 37  | 7  | 8  |
| P55200 | Histone-lysine N-methyltransferase HRX (EC 2.1.1.43) (Zinc finger protein HRX) (ALL-1)                       | Mll (All1) (Hrx) (Mll1) | 67  | 26  | 39 | 44 |
| P19001 | Keratin, type I cytoskeletal 19 (Cytokeratin-19) (CK-19) (Keratin-19) (K19)                                  | Krt19 (Krt1-19)         | 37  | 46  | 11 | 12 |
| Q9QUI0 | Transforming protein RhoA                                                                                    | Rhoa (Arha) (Arha2)     | 117 | 231 | 11 | 12 |
| P27546 | Microtubule-associated protein 4 (MAP-4)                                                                     | Map4 (Mtap4)            | 94  | 41  | 33 | 36 |
| Q8BKC5 | Importin-5 (Imp5) (Importin subunit beta-3) (Karyopherin beta-3) (Ran-binding protein 5) (RanBP5)            | Ipo5 (Kpnb3) (Ranbp5)   | 185 | 91  | 12 | 13 |
| P16546 | Spectrin alpha chain, brain (Spectrin, non-erythroid alpha chain) (Alpha-II spectrin) (Fodrin alpha chain)   | Sptan1 (Spna2) (Spta2)  | 68  | 86  | 66 | 69 |
| Q8CGM2 | Retinitis pigmentosa 1-like 1 protein (Retinitis pigmentosa 1-like protein 1)                                | Rp111 (Rp1hl1)          | 30  | 21  | 58 | 60 |
| P26039 | Talin-1                                                                                                      | Tln1 (Tln)              | 123 | 161 | 41 | 42 |
| Q8R0W0 | Epiplakin                                                                                                    | Eppk1                   | 48  | 25  | 49 | 50 |
| Q9R190 | Metastasis-associated protein MTA2 (Metastasis-associated 1-like 1)                                          | Mta2 (Mta111)           | 27  | 26  | 9  | 9  |
| Q6P5F9 | Exportin-1 (Exp1) (Chromosome region maintenance 1 protein homolog)                                          | Xpo1 (Crm1)             | 19  | 43  | 9  | 9  |
| Q61781 | Keratin, type I cytoskeletal 14 (Cytokeratin-14) (CK-14) (Keratin-14) (K14)                                  | Krt14 (Krt1-14)         | 38  | 37  | 10 | 10 |

|        |                                                                                                                                                    |                                       |      |      |     |     |
|--------|----------------------------------------------------------------------------------------------------------------------------------------------------|---------------------------------------|------|------|-----|-----|
| Q62261 | Spectrin beta chain, brain 1 (Spectrin, non-erythroid beta chain 1) (Beta-II spectrin) (Fodrin beta chain) (Embryonic liver fodrin)                | Sptbn1 (Elf) (Spnb-2) (Spnb2) (Sptb2) | 56   | 54   | 48  | 48  |
| P11499 | Heat shock protein HSP 90-beta (HSP 84) (Tumor-specific transplantation 84 kDa antigen) (TSTA)                                                     | Hsp90ab1 (Hsp84) (Hsp84-1) (Hspcb)    | 2943 | 3523 | 208 | 205 |
| P45591 | Cofilin-2 (Cofilin, muscle isoform)                                                                                                                | Cfl2                                  | 528  | 431  | 39  | 38  |
| Q9QXL1 | Kinesin-like protein KIF21B (Kinesin-like protein KIF6)                                                                                            | Kif21b (Kif6)                         | 22   | 45   | 26  | 25  |
| Q61768 | Kinesin-1 heavy chain (Ubiquitous kinesin heavy chain) (UKHC) (Conventional kinesin heavy chain)                                                   | Kif5b (Khcs) (Kns1)                   | 102  | 303  | 43  | 41  |
| P08730 | Keratin, type I cytoskeletal 13 (Cytokeratin-13) (CK-13) (Keratin-13) (K13) (47 kDa cyto keratin)                                                  | Krt13 (Krt1-13)                       | 37   | 46   | 13  | 12  |
| O35206 | Collagen alpha-1(XV) chain [Cleaved into: Endostatin (Endostatin-XV)]                                                                              | Col15a1                               | 31   | 37   | 12  | 11  |
| P03995 | Glial fibrillary acidic protein (GFAP)                                                                                                             | Gfap                                  | 63   | 90   | 22  | 20  |
| P43406 | Integrin alpha-V (Vitronectin receptor subunit alpha) (CD antigen CD51) [Cleaved into: Integrin alpha-V heavy chain; Integrin alpha-V light chain] | Itgav                                 | 23   | 35   | 19  | 17  |
| P02535 | Keratin, type I cytoskeletal 10 (Cytokeratin-10) (CK-10) (Keratin-10) (K10) (56 kDa cyto keratin) (Keratin, type I cytoskeletal 59 kDa)            | Krt10 (Krt1-10)                       | 252  | 152  | 19  | 17  |
| Q922G7 | Tektin-2 (Testicular tektin) (Tektin-t)                                                                                                            | Tekt2                                 | 25   | 26   | 9   | 8   |
| P26041 | Moesin (Membrane-organizing extension spike protein)                                                                                               | Msn                                   | 136  | 127  | 44  | 39  |
| P33173 | Kinesin-like protein KIF1A (Axonal transporter of synaptic vesicles)                                                                               | Kif1a (Atsv) (Kif1)                   | 45   | 108  | 25  | 22  |
| Q9R0P5 | Destrin (Actin-depolymerizing factor) (ADF) (Sid 23)                                                                                               | Dstn (Dsn) (Sid23)                    | 61   | 81   | 8   | 7   |

|        |                                                                                                                                                                                                                                                                                                                                                                                                                                                                         |                                    |      |      |     |     |
|--------|-------------------------------------------------------------------------------------------------------------------------------------------------------------------------------------------------------------------------------------------------------------------------------------------------------------------------------------------------------------------------------------------------------------------------------------------------------------------------|------------------------------------|------|------|-----|-----|
| Q02053 | Ubiquitin-like modifier-activating enzyme 1 (Ubiquitin-activating enzyme E1) (Ubiquitin-like modifier-activating enzyme 1 X) (Ubiquitin-activating enzyme E1 X)                                                                                                                                                                                                                                                                                                         | Uba1 (Sbx) (Ube1) (Ube1ax) (Ube1x) | 660  | 1086 | 63  | 55  |
| Q9CYF5 | Williams-Beuren syndrome chromosomal region 16 protein homolog                                                                                                                                                                                                                                                                                                                                                                                                          | Wbscr16                            | 38   | 28   | 7   | 6   |
| O88866 | Hormonally up-regulated neu tumor-associated kinase (EC 2.7.11.1) (Serine/threonine-protein kinase MAK-V)                                                                                                                                                                                                                                                                                                                                                               | Hunk (Makv)                        | 27   | 21   | 14  | 12  |
| Q9ES17 | Interleukin-21 (IL-21)                                                                                                                                                                                                                                                                                                                                                                                                                                                  | Il21                               | 22   | 25   | 6   | 5   |
| P20357 | Microtubule-associated protein 2 (MAP-2)                                                                                                                                                                                                                                                                                                                                                                                                                                | Map2 (Mtap2)                       | 50   | 22   | 30  | 25  |
| P19096 | Fatty acid synthase (EC 2.3.1.85) [Includes: [Acyl-carrier-protein] S-acetyltransferase (EC 2.3.1.38); [Acyl-carrier-protein] S-malonyltransferase (EC 2.3.1.39); 3-oxoacyl-[acyl-carrier-protein] synthase (EC 2.3.1.41); 3-oxoacyl-[acyl-carrier-protein] reductase (EC 1.1.1.100); 3-hydroxypalmitoyl-[acyl-carrier-protein] dehydratase (EC 4.2.1.61); Enoyl-[acyl-carrier-protein] reductase (EC 1.3.1.10); Oleoyl [acyl-carrier-protein] hydrolase (EC 3.1.2.14)] | Fasn                               | 1869 | 1524 | 163 | 135 |
| O55103 | Periaxin                                                                                                                                                                                                                                                                                                                                                                                                                                                                | Prx                                | 19   | 30   | 28  | 23  |
| P14206 | 40S ribosomal protein SA (Laminin receptor 1) (p40) (34/67 kDa laminin receptor) (37 kDa oncofetal antigen) (OFA/iLRP)                                                                                                                                                                                                                                                                                                                                                  | Rpsa (Lamr1) (P40-8)               | 131  | 112  | 11  | 9   |
| Q64512 | Tyrosine-protein phosphatase non-receptor type 13 (EC 3.1.3.48) (Protein tyrosine phosphatase PTP-BL) (Protein-tyrosine phosphatase RIP) (Protein tyrosine phosphatase DPZPTP) (PTP36)                                                                                                                                                                                                                                                                                  | Ptpn13 (Ptp14)                     | 28   | 27   | 26  | 21  |
| Q9QWL7 | Keratin, type I cytoskeletal 17 (Cytokeratin-17) (CK-17) (Keratin-17) (K17)                                                                                                                                                                                                                                                                                                                                                                                             | Krt17 (Krt1-17)                    | 38   | 46   | 14  | 11  |

|        |                                                                                                                                      |                                 |      |      |     |     |
|--------|--------------------------------------------------------------------------------------------------------------------------------------|---------------------------------|------|------|-----|-----|
| Q80W68 | Kin of IRRE-like protein 1 (Kin of irregular chiasm-like protein 1) (Nephrin-like protein 1)                                         | Kirrel (Kirrel1) (Neph1)        | 32   | 38   | 22  | 17  |
| P31254 | Ubiquitin-like modifier-activating enzyme 1 Y (Ubiquitin-activating enzyme E1 Y) (Ubiquitin-activating enzyme E1)                    | Ube1ay (Sby) (Ube1y) (Ube1y1)   | 161  | 77   | 22  | 17  |
| P39447 | Tight junction protein ZO-1 (Zonula occludens protein 1) (Zona occludens protein 1) (Tight junction protein 1)                       | Tjp1 (Zo1)                      | 36   | 15   | 21  | 16  |
| P97434 | Myosin phosphatase Rho-interacting protein (Rho-interacting protein 3) (RIP3) (p116Rip)                                              | Mrip (Kiaa0864) (Mrip) (Rhoip3) | 35   | 23   | 25  | 19  |
| Q3TXS7 | 26S proteasome non-ATPase regulatory subunit 1 (26S proteasome regulatory subunit RPN2) (26S proteasome regulatory subunit S1)       | Psm1                            | 100  | 89   | 16  | 12  |
| P60710 | Actin, cytoplasmic 1 (Beta-actin)                                                                                                    | Actb                            | 5140 | 4496 | 282 | 208 |
| Q61656 | Probable ATP-dependent RNA helicase DDX5 (EC 3.6.1.-) (DEAD box protein 5) (RNA helicase p68) (DEAD box RNA helicase DEAD1) (mDEAD1) | Ddx5 (Tnz2)                     | 90   | 43   | 11  | 8   |
| Q60673 | Receptor-type tyrosine-protein phosphatase-like N (R-PTP-N) (PTP IA-2)                                                               | Ptprn (Ptp35)                   | 30   | 18   | 14  | 10  |
| Q03172 | Zinc finger protein 40 (Transcription factor alphaA-CRYBP1) (Alpha A-crystallin-binding protein I) (Alpha A-CRYBP1)                  | Hivep1 (Cryabp1) (Znf40)        | 25   | 24   | 21  | 15  |
| P08551 | Neurofilament light polypeptide (NF-L) (Neurofilament triplet L protein) (68 kDa neurofilament protein)                              | Nefl (Nf68) (Nfl)               | 51   | 36   | 17  | 12  |
| Q6ZQ12 | Ninein-like protein                                                                                                                  | Nlp (Kiaa0980)                  | 15   | 34   | 23  | 16  |
| Q91YJ5 | Translation initiation factor IF-2, mitochondrial (IF-2Mt) (IF2(mt)) (IF-2(Mt))                                                      | Mtif2                           | 29   | 23   | 13  | 9   |
| Q9CWF2 | Tubulin beta-2B chain                                                                                                                | Tubb2b                          | 1435 | 825  | 86  | 59  |
| P99024 | Tubulin beta-5 chain                                                                                                                 | Tubb5                           | 1377 | 976  | 88  | 60  |

|        |                                                                                                                                                                                                                                                                                                        |                                |      |      |     |     |
|--------|--------------------------------------------------------------------------------------------------------------------------------------------------------------------------------------------------------------------------------------------------------------------------------------------------------|--------------------------------|------|------|-----|-----|
| Q62168 | Keratin, type I cuticular Ha2 (Hair keratin, type I Ha2) (Keratin-32) (K32)                                                                                                                                                                                                                            | Krt32 (Hka2) (Krt1-2) (Krtha2) | 39   | 36   | 9   | 6   |
| Q8K4L3 | Supervillin (Archvillin) (p205/p250)                                                                                                                                                                                                                                                                   | Svil                           | 25   | 22   | 18  | 12  |
| Q8K1N2 | Pleckstrin homology-like domain family B member 2 (Protein LL5-beta)                                                                                                                                                                                                                                   | Phldb2 (LI5b)                  | 31   | 31   | 48  | 32  |
| P68033 | Actin, alpha cardiac muscle 1 (Alpha-cardiac actin)                                                                                                                                                                                                                                                    | Actc1 (Actc)                   | 3948 | 2726 | 234 | 155 |
| P40142 | Transketolase (TK) (EC 2.2.1.1) (P68)                                                                                                                                                                                                                                                                  | Tkt                            | 562  | 250  | 117 | 75  |
| Q61983 | Sodium-dependent phosphate transport protein 1 (Sodium/phosphate cotransporter 1) (Na(+)/PI cotransporter 1) (Solute carrier family 17 member 1) (Renal sodium-dependent phosphate transport protein 1) (Renal sodium-phosphate transport protein 1) (Renal Na(+)-dependent phosphate cotransporter 1) | Slc17a1 (Npt1)                 | 31   | 33   | 8   | 5   |
| Q80U87 | Ubiquitin carboxyl-terminal hydrolase 8 (EC 3.1.2.15) (Ubiquitin thioesterase 8) (Ubiquitin-specific-processing protease 8) (Deubiquitinating enzyme 8) (mUBPy)                                                                                                                                        | Usp8 (Kiaa0055) (UbpY)         | 29   | 23   | 24  | 15  |
| Q9Z0P5 | Twinfilin-2 (Twinfilin-1-like protein) (A6-related protein) (mA6RP)                                                                                                                                                                                                                                    | Twf2 (Ptk9I)                   | 29   | 32   | 10  | 6   |
| Q9QWK5 | Baculoviral IAP repeat-containing protein 1a (Neuronal apoptosis inhibitory protein 1)                                                                                                                                                                                                                 | Naip1 (Birc1a) (Naip)          | 21   | 28   | 20  | 12  |
| P26040 | Ezrin (p81) (Cytovillin) (Villin-2)                                                                                                                                                                                                                                                                    | Ezr (Vil2)                     | 127  | 106  | 27  | 16  |
| P63017 | Heat shock cognate 71 kDa protein (Heat shock 70 kDa protein 8)                                                                                                                                                                                                                                        | Hspa8 (Hsc70) (Hsc73)          | 1719 | 959  | 119 | 70  |
| P05532 | Mast/stem cell growth factor receptor (SCFR) (EC 2.7.10.1) (Proto-oncogene tyrosine-protein kinase Kit) (c-kit) (CD antigen CD117)                                                                                                                                                                     | Kit (SI)                       | 16   | 35   | 12  | 7   |
| P47757 | F-actin-capping protein subunit beta (CapZ beta)                                                                                                                                                                                                                                                       | Capzb (Cappb1)                 | 107  | 68   | 7   | 4   |

|            |        |                                                                                                                                                                                                             |                                   |      |      |    |     |
|------------|--------|-------------------------------------------------------------------------------------------------------------------------------------------------------------------------------------------------------------|-----------------------------------|------|------|----|-----|
|            | P26043 | Radixin (ESP10)                                                                                                                                                                                             | Rdx                               | 127  | 106  | 23 | 13  |
|            | Q922F4 | Tubulin beta-6 chain                                                                                                                                                                                        | Tubb6                             | 583  | 382  | 40 | 21  |
| Exocytosis | Q99N50 | Synaptotagmin-like protein 2 (Exophilin-4)                                                                                                                                                                  | Syt12 (Slp2)                      | 26   | 77   | 10 | 18  |
|            | P57776 | Elongation factor 1-delta (EF-1-delta)                                                                                                                                                                      | Eef1d                             | 109  | 35   | 3  | 5   |
|            | P14824 | Annexin A6 (Annexin-6) (Annexin VI) (Lipocortin VI) (p68) (p70) (Protein III) (Chromobindin-20) (67 kDa calelectrin) (Calphobindin-II) (CPB-II)                                                             | Anxa6 (Anx6)                      | 168  | 591  | 33 | 51  |
|            | Q7TN83 | Synaptotagmin-16 (Synaptotagmin XIV-related protein) (Synaptotagmin 14-like protein)                                                                                                                        | Syt16 (Strep14) (Syt14l) (Syt14r) | 20   | 38   | 6  | 9   |
|            | Q9Z277 | Bromodomain adjacent to zinc finger domain protein 1B (Williams-Beuren syndrome chromosomal region 9 protein homolog) (WBRS9)                                                                               | Baz1b (Wbscr9)                    | 43   | 17   | 26 | 34  |
|            | P63101 | 14-3-3 protein zeta/delta (Protein kinase C inhibitor protein 1) (KCIP-1) (SEZ-2)                                                                                                                           | Ywhaz                             | 1383 | 1947 | 96 | 120 |
|            | P31001 | Desmin                                                                                                                                                                                                      | Des                               | 169  | 224  | 25 | 31  |
|            | O35618 | Protein Mdm4 (p53-binding protein Mdm4) (Mdm2-like p53-binding protein) (Protein Mdmx) (Double minute 4 protein)                                                                                            | Mdm4 (Mdmx)                       | 17   | 29   | 5  | 6   |
|            | P48754 | Breast cancer type 1 susceptibility protein homolog                                                                                                                                                         | Brca1                             | 28   | 25   | 26 | 30  |
|            | P08113 | Endoplasmic reticulum chaperone protein (Heat shock protein 90 kDa beta member 1) (94 kDa glucose-regulated protein) (GRP94) (ERP99) (Polymorphic tumor rejection antigen 1) (Tumor rejection antigen gp96) | Hsp90b1 (Tra-1) (Tra1)            | 221  | 298  | 25 | 27  |

|             |        |                                                                                                                                                                                                                                                                                                                                        |                           |     |     |    |    |
|-------------|--------|----------------------------------------------------------------------------------------------------------------------------------------------------------------------------------------------------------------------------------------------------------------------------------------------------------------------------------------|---------------------------|-----|-----|----|----|
|             | P70398 | Probable ubiquitin carboxyl-terminal hydrolase FAF-X (EC 3.1.2.15) (Ubiquitin thioesterase FAF-X) (Ubiquitin-specific-processing protease FAF-X) (Deubiquitinating enzyme FAF-X) (Fat facets protein-related, X-linked) (Ubiquitin-specific protease 9, X chromosome) (Ubiquitin carboxyl-terminal hydrolase FAM) (Fat facets homolog) | Usp9x (FafI) (Fam)        | 42  | 28  | 57 | 61 |
|             | Q9JIF7 | Coatomer subunit beta (Beta-coat protein) (Beta-COP)                                                                                                                                                                                                                                                                                   | Copb1 (Copb)              | 37  | 22  | 15 | 15 |
|             | Q8R4U7 | Leucine zipper protein 1 (Leucine zipper motif-containing protein)                                                                                                                                                                                                                                                                     | Luzp1 (Luzp)              | 31  | 32  | 22 | 20 |
|             | Q9QXA7 | Tripartite motif-containing protein 44 (Protein DIPB) (Protein Mc7)                                                                                                                                                                                                                                                                    | Trim44 (Dipb)             | 28  | 23  | 18 | 16 |
|             | Q921E2 | Ras-related protein Rab-31                                                                                                                                                                                                                                                                                                             | Rab31                     | 18  | 29  | 7  | 6  |
|             | O88866 | Hormonally up-regulated neu tumor-associated kinase (EC 2.7.11.1) (Serine/threonine-protein kinase MAK-V)                                                                                                                                                                                                                              | Hunk (Makv)               | 27  | 21  | 14 | 12 |
|             | Q64512 | Tyrosine-protein phosphatase non-receptor type 13 (EC 3.1.3.48) (Protein tyrosine phosphatase PTP-BL) (Protein-tyrosine phosphatase RIP) (Protein tyrosine phosphatase DPZPTP) (PTP36)                                                                                                                                                 | Ptpn13 (Ptp14)            | 28  | 27  | 26 | 21 |
|             | Q5XJY5 | Coatomer subunit delta (Delta-coat protein) (Delta-COP) (Archain)                                                                                                                                                                                                                                                                      | Arcn1 (Copd)              | 61  | 45  | 10 | 8  |
|             | Q6A078 | Centrosomal protein of 290 kDa (Cep290) (Nephrocystin-6)                                                                                                                                                                                                                                                                               | Cep290 (Kiaa0373) (Nphp6) | 32  | 57  | 85 | 66 |
|             | Q8BHS8 | Syntabulin (Syntaxin-1-binding protein) (Golgi-localized syntaphilin-related protein) (m-Golsyn)                                                                                                                                                                                                                                       | Sybu (Golsyn) (Kiaa1472)  | 32  | 19  | 17 | 13 |
|             | Q3UXZ6 | Protein FAM81A                                                                                                                                                                                                                                                                                                                         | Fam81a                    | 22  | 27  | 13 | 8  |
|             | Q922F4 | Tubulin beta-6 chain                                                                                                                                                                                                                                                                                                                   | Tubb6                     | 583 | 382 | 40 | 21 |
| Spermatogen | Q8BGQ1 | Uncharacterized protein C14orf133 homolog                                                                                                                                                                                                                                                                                              |                           | 23  | 28  | 5  | 9  |



esis and motility

|        |                                                                                            |                                                                                                                                                 |     |      |    |    |
|--------|--------------------------------------------------------------------------------------------|-------------------------------------------------------------------------------------------------------------------------------------------------|-----|------|----|----|
| Q8BYC6 | Serine/threonine-protein kinase TAO3 (EC 2.7.11.1) (Thousand and one amino acid protein 3) | Taok3                                                                                                                                           | 32  | 38   | 9  | 16 |
| P03987 | Ig gamma-3 chain C region                                                                  |                                                                                                                                                 | 30  | 34   | 4  | 7  |
| P62962 | Profilin-1 (Profilin I)                                                                    | Pfn1                                                                                                                                            | 30  | 93   | 4  | 7  |
| Q8BFQ9 | Kelch domain-containing protein 5                                                          | Klhdc5 (Kiaa1340)                                                                                                                               | 30  | 22   | 10 | 17 |
| P62806 | Histone H4                                                                                 | Hist1h4a; Hist1h4b (H4-53); Hist1h4c (H4-12); Hist1h4d; Hist1h4f; Hist1h4h; Hist1h4i; Hist1h4j; Hist1h4k; Hist1h4m; Hist2h4a (Hist2h4); Hist4h4 | 815 | 1617 | 47 | 78 |
| P63158 | High mobility group protein B1 (High mobility group protein 1) (HMG-1)                     | Hmgb1 (Hmg-1) (Hmg1)                                                                                                                            | 153 | 405  | 25 | 38 |
| O55142 | 60S ribosomal protein L35a                                                                 | Rpl35a                                                                                                                                          | 24  | 50   | 4  | 6  |
| Q3UDW8 | Heparan-alpha-glucosaminide N-acetyltransferase (EC 2.3.1.78) (Transmembrane protein 76)   | Hgsnat (D8Ert354e) (Tmem76)                                                                                                                     | 34  | 22   | 6  | 9  |
| Q9D1H6 | Protein HRPAP20 (Hormone-regulated proliferation-associated protein of 20 kDa homolog)     | Hrpap20                                                                                                                                         | 70  | 38   | 6  | 9  |
| Q62522 | Zona pellucida-binding protein 1 (Sp38)                                                    | Zpbp (Zbbp1)                                                                                                                                    | 38  | 42   | 8  | 12 |
| Q61937 | Nucleophosmin (NPM) (Nucleolar phosphoprotein B23) (Numatrin) (Nucleolar protein NO38)     | Npm1                                                                                                                                            | 92  | 66   | 11 | 15 |

|        |                                                                                                                                                                                         |                                   |     |     |     |     |
|--------|-----------------------------------------------------------------------------------------------------------------------------------------------------------------------------------------|-----------------------------------|-----|-----|-----|-----|
| P70168 | Importin subunit beta-1 (Karyopherin subunit beta-1) (Nuclear factor P97) (Pore targeting complex 97 kDa subunit) (PTAC97) (SCG)                                                        | Kpnb1 (Impnb)                     | 48  | 17  | 13  | 17  |
| Q61316 | Heat shock 70 kDa protein 4 (Heat shock 70-related protein APG-2)                                                                                                                       | Hspa4 (Apg2) (Hsp110)             | 379 | 792 | 42  | 52  |
| Q8BU30 | Isoleucyl-tRNA synthetase, cytoplasmic (EC 6.1.1.5) (Isoleucine--tRNA ligase) (IleRS) (IRS)                                                                                             | Iars                              | 85  | 46  | 30  | 37  |
| Q8BGD9 | Eukaryotic translation initiation factor 4B (eIF-4B)                                                                                                                                    | Eif4b                             | 238 | 306 | 13  | 16  |
| P51880 | Fatty acid-binding protein, brain (B-FABP) (Fatty acid-binding protein 7) (Brain lipid-binding protein) (BLBP)                                                                          | Fabp7 (Blbp)                      | 933 | 856 | 31  | 38  |
| Q9CZY3 | Ubiquitin-conjugating enzyme E2 variant 1 (UEV-1) (CROC-1)                                                                                                                              | Ube2v1 (Croc1)                    | 83  | 163 | 166 | 201 |
| O08648 | Mitogen-activated protein kinase kinase kinase 4 (EC 2.7.11.25) (MAPK/ERK kinase kinase 4) (MEK kinase 4) (MEKK 4)                                                                      | Map3k4 (Mekk4)                    | 37  | 16  | 19  | 23  |
| P54227 | Stathmin (Phosphoprotein p19) (pp19) (Leukemia-associated phosphoprotein p18) (Oncoprotein 18) (Op18) (pp17) (Prosolin) (Metablastin) (Protein Pr22) (Leukemia-associated gene protein) | Stmn1 (Lag) (Lap18) (Pr22)        | 121 | 120 | 10  | 12  |
| P80315 | T-complex protein 1 subunit delta (TCP-1-delta) (CCT-delta) (A45)                                                                                                                       | Cct4 (Cctd)                       | 61  | 59  | 15  | 18  |
| Q61771 | Kinesin-like protein KIF3B (Microtubule plus end-directed kinesin motor 3B)                                                                                                             | Kif3b                             | 30  | 51  | 16  | 19  |
| P80313 | T-complex protein 1 subunit eta (TCP-1-eta) (CCT-eta)                                                                                                                                   | Cct7 (Ccth)                       | 49  | 50  | 11  | 13  |
| Q9Z2K1 | Keratin, type I cytoskeletal 16 (Cytokeratin-16) (CK-16) (Keratin-16) (K16)                                                                                                             | Krt16 (Krt1-16)                   | 37  | 37  | 7   | 8   |
| P41230 | Histone demethylase JARID1C (EC 1.14.11.-) (Jumonji/ARID domain-containing protein 1C) (Protein SmcX) (Protein Xe169)                                                                   | Jarid1c (Kiaa0234) (Smcx) (Xe169) | 34  | 32  | 26  | 29  |

|        |                                                                                                                                     |                                                |      |      |     |     |
|--------|-------------------------------------------------------------------------------------------------------------------------------------|------------------------------------------------|------|------|-----|-----|
| P10126 | Elongation factor 1-alpha 1 (EF-1-alpha-1)<br>(Elongation factor 1 A-1) (eEF1A-1)<br>(Elongation factor Tu) (EF-Tu)                 | Eef1a1<br>(Eef1a)                              | 2004 | 2344 | 305 | 330 |
| P11984 | T-complex protein 1 subunit alpha A (TCP-1-alpha)<br>(CCT-alpha) (Tailless complex polypeptide 1A) (TCP-1-A)                        | Cct1 (Ccta)<br>(Tcp1)                          | 29   | 66   | 14  | 15  |
| P62242 | 40S ribosomal protein S8                                                                                                            | Rps8                                           | 479  | 372  | 18  | 19  |
| O35973 | Period circadian protein homolog 1 (Circadian clock protein PERIOD 1) (Circadian pacemaker protein Rigi) (mPER1)                    | Per1 (Per)<br>(Rigi)                           | 29   | 21   | 27  | 28  |
| Q8R4K2 | Interleukin-1 receptor-associated kinase 4 (IRAK-4) (EC 2.7.11.1)                                                                   | Irak4                                          | 32   | 47   | 22  | 22  |
| Q62261 | Spectrin beta chain, brain 1 (Spectrin, non-erythroid beta chain 1) (Beta-II spectrin) (Fodrin beta chain) (Embryonic liver fodrin) | Sptbn1 (Elf)<br>(Spnb-2)<br>(Spnb2)<br>(Sptb2) | 56   | 54   | 48  | 48  |
| P03966 | N-myc proto-oncogene protein                                                                                                        | Mycn (Nmyc)<br>(Nmyc1)                         | 65   | 46   | 18  | 17  |
| Q61147 | Ceruloplasmin (EC 1.16.3.1) (Ferroxidase)                                                                                           | Cp                                             | 24   | 27   | 41  | 36  |
| Q8VHE6 | Dynein heavy chain 5, axonemal (Axonemal beta dynein heavy chain 5) (Mdnah5) (Ciliary dynein heavy chain 5)                         | Dnah5<br>(Dnahc5)                              | 47   | 44   | 83  | 72  |
| O54749 | Cytochrome P450 2J5 (EC 1.14.14.1) (CYPIIJ5) (Arachidonic acid epoxygenase)                                                         | Cyp2j5                                         | 29   | 34   | 7   | 6   |
| P11983 | T-complex protein 1 subunit alpha B (TCP-1-alpha)<br>(CCT-alpha) (Tailless complex polypeptide 1B) (TCP-1-B)                        | Cct1 (Ccta)<br>(Tcp1)                          | 29   | 66   | 18  | 15  |
| P09405 | Nucleolin (Protein C23)                                                                                                             | Ncl (Nuc)                                      | 775  | 872  | 78  | 65  |
| P80316 | T-complex protein 1 subunit epsilon (TCP-1-epsilon) (CCT-epsilon)                                                                   | Cct5 (Ccte)<br>(Kiaa0098)                      | 239  | 102  | 17  | 14  |
| Q8BP67 | 60S ribosomal protein L24                                                                                                           | Rpl24                                          | 354  | 214  | 24  | 19  |

|        |                                                                                                                                   |                                        |      |     |     |     |
|--------|-----------------------------------------------------------------------------------------------------------------------------------|----------------------------------------|------|-----|-----|-----|
| Q9JHU4 | Cytoplasmic dynein 1 heavy chain 1 (Cytoplasmic dynein heavy chain 1) (Dynein heavy chain, cytosolic)                             | Dync1h1 (Dhc1) (Dnch1) (Dnchc1) (Dyhc) | 822  | 395 | 157 | 123 |
| Q9QYB1 | Chloride intracellular channel protein 4 (mc3s5/mtCLIC)                                                                           | Clic4                                  | 28   | 33  | 4   | 3   |
| P25444 | 40S ribosomal protein S2 (S4) (LLRep3 protein)                                                                                    | Rps2 (Llrep3) (Rps4)                   | 217  | 50  | 26  | 19  |
| P14148 | 60S ribosomal protein L7                                                                                                          | Rpl7                                   | 145  | 52  | 14  | 10  |
| P99024 | Tubulin beta-5 chain                                                                                                              | Tubb5                                  | 1377 | 976 | 88  | 60  |
| P42932 | T-complex protein 1 subunit theta (TCP-1-theta) (CCT-theta)                                                                       | Cct8 (Cctq)                            | 197  | 57  | 23  | 15  |
| Q924W6 | Tripartite motif-containing protein 66 (Transcriptional intermediary factor 1 delta)                                              | Trim66 (Tif1d)                         | 28   | 18  | 23  | 15  |
| Q8BGR5 | Protein FAM53B                                                                                                                    | Fam53b                                 | 47   | 41  | 19  | 12  |
| P17156 | Heat shock-related 70 kDa protein 2 (Heat shock protein 70.2)                                                                     | Hspa2 (Hcp70.2) (Hsp70-2)              | 964  | 544 | 60  | 37  |
| P62301 | 40S ribosomal protein S13                                                                                                         | Rps13                                  | 77   | 100 | 23  | 14  |
| Q6NZJ6 | Eukaryotic translation initiation factor 4 gamma 1 (eIF-4-gamma 1) (eIF-4G 1) (eIF-4G1)                                           | Eif4g1                                 | 47   | 113 | 30  | 18  |
| P80317 | T-complex protein 1 subunit zeta (TCP-1-zeta) (CCT-zeta) (CCT-zeta-1)                                                             | Cct6a (Cct6) (Cctz) (Cctz1)            | 160  | 52  | 22  | 13  |
| P63017 | Heat shock cognate 71 kDa protein (Heat shock 70 kDa protein 8)                                                                   | Hspa8 (Hsc70) (Hsc73)                  | 1719 | 959 | 119 | 70  |
| P41105 | 60S ribosomal protein L28                                                                                                         | Rpl28                                  | 49   | 41  | 19  | 11  |
| P26043 | Radixin (ESP10)                                                                                                                   | Rdx                                    | 127  | 106 | 23  | 13  |
| O35664 | Interferon-alpha/beta receptor beta chain (Interferon alpha/beta receptor 2) (IFN-alpha-REC) (Type I interferon receptor) (IFN-R) | Ifnar2                                 | 37   | 21  | 11  | 6   |
| Q61390 | T-complex protein 1 subunit zeta-2 (TCP-1-zeta-2) (CCT-zeta-2) (Cctz-2)                                                           | Cct6b                                  | 55   | 52  | 15  | 8   |

|                                     |        |                                                                                                                                                                                     |                      |     |      |    |    |
|-------------------------------------|--------|-------------------------------------------------------------------------------------------------------------------------------------------------------------------------------------|----------------------|-----|------|----|----|
|                                     | Q922F4 | Tubulin beta-6 chain                                                                                                                                                                | Tubb6                | 583 | 382  | 40 | 21 |
| Protein metabolism and modification | Q9CXW3 | Calcyclin-binding protein (CacyBP) (Siah-interacting protein)                                                                                                                       | Cacybp (Sip)         | 57  | 39   | 7  | 13 |
|                                     | Q99N50 | Synaptotagmin-like protein 2 (Exophilin-4)                                                                                                                                          | Syt12 (Slp2)         | 26  | 77   | 10 | 18 |
|                                     | Q8BYC6 | Serine/threonine-protein kinase TAO3 (EC 2.7.11.1) (Thousand and one amino acid protein 3)                                                                                          | Taok3                | 32  | 38   | 9  | 16 |
|                                     | Q61414 | Keratin, type I cytoskeletal 15 (Cytokeratin-15) (CK-15) (Keratin-15) (K15)                                                                                                         | Krt15 (Krt1-15)      | 37  | 46   | 4  | 7  |
|                                     | P17742 | Peptidyl-prolyl cis-trans isomerase A (PPIase A) (Rotamase A) (EC 5.2.1.8) (Cyclophilin A) (Cyclosporin A-binding protein) (SP18)                                                   | Ppia                 | 855 | 1549 | 38 | 66 |
|                                     | Q9R117 | Non-receptor tyrosine-protein kinase TYK2 (EC 2.7.10.2)                                                                                                                             | Tyk2                 | 27  | 30   | 15 | 26 |
|                                     | Q9D009 | Putative octanoyltransferase, mitochondrial (EC 2.3.1.181) (Octanoyl-[acyl-carrier-protein]-protein N-octanoyltransferase) (Lipoyl/octanoyl transferase) (Lipoate-protein ligase B) |                      | 38  | 42   | 11 | 19 |
|                                     | P57776 | Elongation factor 1-delta (EF-1-delta)                                                                                                                                              | Eef1d                | 109 | 35   | 3  | 5  |
|                                     | P35175 | Stefin-3                                                                                                                                                                            | Stfa3 (Stf-3) (Stf3) | 25  | 27   | 6  | 10 |
|                                     | P35980 | 60S ribosomal protein L18                                                                                                                                                           | Rpl18                | 32  | 22   | 51 | 85 |
|                                     | Q8BHG1 | Nardilysin (EC 3.4.24.61) (N-arginine dibasic convertase) (NRD convertase) (NRD-C)                                                                                                  | Nrd1                 | 53  | 54   | 13 | 21 |
|                                     | Q8VDM4 | 26S proteasome non-ATPase regulatory subunit 2 (26S proteasome regulatory subunit RPN1) (26S proteasome regulatory subunit S2) (26S proteasome subunit p97)                         | Psm2                 | 113 | 157  | 18 | 29 |
|                                     | Q6ZWX6 | Eukaryotic translation initiation factor 2 subunit 1 (Eukaryotic translation initiation factor 2 subunit alpha) (eIF-2-alpha) (EIF-2alpha) (EIF-2A)                                 | Eif2s1 (Eif2a)       | 27  | 177  | 7  | 11 |

|        |                                                                                                                                                                    |                              |     |     |    |    |
|--------|--------------------------------------------------------------------------------------------------------------------------------------------------------------------|------------------------------|-----|-----|----|----|
| Q61990 | Poly(rC)-binding protein 2 (Alpha-CP2) (Putative heterogeneous nuclear ribonucleoprotein X) (hnRNP X) (CTBP) (CBP)                                                 | Pcbp2 (Cbp) (HnrnpX) (Hnrpx) | 29  | 194 | 7  | 11 |
| Q9D8W5 | 26S proteasome non-ATPase regulatory subunit 12 (26S proteasome regulatory subunit p55)                                                                            | Psmc12                       | 67  | 78  | 7  | 11 |
| P62082 | 40S ribosomal protein S7                                                                                                                                           | Rps7                         | 104 | 126 | 9  | 14 |
| Q9Z1S0 | Mitotic checkpoint serine/threonine-protein kinase BUB1 beta (EC 2.7.11.1) (MAD3/BUB1-related protein kinase) (Mitotic checkpoint kinase MAD3L)                    | Bub1b (Mad3l)                | 20  | 41  | 15 | 23 |
| O55142 | 60S ribosomal protein L35a                                                                                                                                         | Rpl35a                       | 24  | 50  | 4  | 6  |
| Q9CQY5 | Magnesium transporter protein 1 (MagT1) (Implantation-associated protein) (IAP)                                                                                    | Magt1 (Iag2)                 | 26  | 22  | 8  | 12 |
| P83741 | Serine/threonine-protein kinase WNK1 (EC 2.7.11.1) (Protein kinase with no lysine 1) (Protein kinase, lysine-deficient 1)                                          | Wnk1 (Prkwnk1)               | 56  | 36  | 18 | 27 |
| P99026 | Proteasome subunit beta type-4 (Proteasome beta chain) (EC 3.4.25.1) (Macropain beta chain) (Multicatalytic endopeptidase complex beta chain) (Proteasome chain 3) | Psmc4 (Lmp3)                 | 93  | 289 | 11 | 16 |
| P60335 | Poly(rC)-binding protein 1 (Alpha-CP1) (hnRNP-E1)                                                                                                                  | Pcbp1                        | 56  | 350 | 9  | 13 |
| P35761 | Dual specificity protein kinase TTK (ESK) (PYT) (EC 2.7.12.1)                                                                                                      | Ttk (Esk)                    | 14  | 34  | 9  | 13 |
| O70251 | Elongation factor 1-beta (EF-1-beta)                                                                                                                               | Eef1b (Eef1b2)               | 39  | 102 | 7  | 10 |
| Q00342 | FL cytokine receptor (EC 2.7.10.1) (Tyrosine-protein kinase receptor flk-2) (Fetal liver kinase 2) (Tyrosine-protein kinase FLT3) (CD antigen CD135)               | Flt3 (Flk-2) (Flt3)          | 17  | 34  | 7  | 10 |

|        |                                                                                                                                                                         |                        |     |     |     |     |
|--------|-------------------------------------------------------------------------------------------------------------------------------------------------------------------------|------------------------|-----|-----|-----|-----|
| Q9Z1F9 | SUMO-activating enzyme subunit 2 (EC 6.3.2.-) (Ubiquitin-like 1-activating enzyme E1B) (Anthracycline-associated resistance ARX)                                        | Uba2 (Sae2) (Uble1b)   | 62  | 77  | 10  | 14  |
| P17047 | Lysosome-associated membrane glycoprotein 2 (LAMP-2) (Lysosomal membrane glycoprotein type B) (LGP-B) (CD107 antigen-like family member B) (CD antigen CD107b)          | Lamp2 (Lamp-2)         | 26  | 29  | 8   | 11  |
| Q9ERU9 | E3 SUMO-protein ligase RanBP2 (Ran-binding protein 2)                                                                                                                   | Ranbp2                 | 56  | 49  | 40  | 53  |
| Q61846 | Maternal embryonic leucine zipper kinase (EC 2.7.11.1) (Protein kinase PK38) (mPK38)                                                                                    | Melk (Kiaa0175) (Pk38) | 28  | 32  | 10  | 13  |
| Q60716 | Prolyl 4-hydroxylase subunit alpha-2 (EC 1.14.11.2) (4-PH alpha-2) (Procollagen-proline,2-oxoglutarate-4-dioxygenase subunit alpha-2)                                   | P4ha2                  | 22  | 27  | 8   | 10  |
| Q61316 | Heat shock 70 kDa protein 4 (Heat shock 70-related protein APG-2)                                                                                                       | Hspa4 (Apg2) (Hsp110)  | 379 | 792 | 42  | 52  |
| Q8BU30 | Isoleucyl-tRNA synthetase, cytoplasmic (EC 6.1.1.5) (Isoleucine--tRNA ligase) (IleRS) (IRS)                                                                             | Iars                   | 85  | 46  | 30  | 37  |
| Q8BGD9 | Eukaryotic translation initiation factor 4B (eIF-4B)                                                                                                                    | Eif4b                  | 238 | 306 | 13  | 16  |
| Q9R1P0 | Proteasome subunit alpha type-4 (EC 3.4.25.1) (Proteasome component C9) (Macropain subunit C9) (Multicatalytic endopeptidase complex subunit C9) (Proteasome subunit L) | Psma4                  | 29  | 151 | 14  | 17  |
| Q9CZY3 | Ubiquitin-conjugating enzyme E2 variant 1 (UEV-1) (CROC-1)                                                                                                              | Ube2v1 (Croc1)         | 83  | 163 | 166 | 201 |
| O08648 | Mitogen-activated protein kinase kinase kinase 4 (EC 2.7.11.25) (MAPK/ERK kinase kinase 4) (MEK kinase 4) (MEKK 4)                                                      | Map3k4 (Mekk4)         | 37  | 16  | 19  | 23  |

|        |                                                                                                                                                                                                                       |                       |     |     |     |     |
|--------|-----------------------------------------------------------------------------------------------------------------------------------------------------------------------------------------------------------------------|-----------------------|-----|-----|-----|-----|
| P49025 | Citron Rho-interacting kinase (CRIK) (EC 2.7.11.1) (Rho-interacting, serine/threonine-protein kinase 21)                                                                                                              | Cit                   | 49  | 67  | 67  | 81  |
| Q9QUR6 | Prolyl endopeptidase (PE) (EC 3.4.21.26) (Post-proline cleaving enzyme)                                                                                                                                               | Prep (Pep)            | 56  | 20  | 15  | 18  |
| P80315 | T-complex protein 1 subunit delta (TCP-1-delta) (CCT-delta) (A45)                                                                                                                                                     | Cct4 (Cctd)           | 61  | 59  | 15  | 18  |
| O08810 | 116 kDa U5 small nuclear ribonucleoprotein component (U5 snRNP-specific protein, 116 kDa) (U5-116 kDa) (Elongation factor Tu GTP-binding domain-containing protein 2)                                                 | Eftud2 (Snrp116)      | 80  | 68  | 21  | 25  |
| P54103 | DnaJ homolog subfamily C member 2 (Zuotin-related factor 1) (Mouse Id associate 1) (MIDA1)                                                                                                                            | Dnajc2 (Mida1) (Zrf1) | 23  | 27  | 11  | 13  |
| P80313 | T-complex protein 1 subunit eta (TCP-1-eta) (CCT-eta)                                                                                                                                                                 | Cct7 (Ccth)           | 49  | 50  | 11  | 13  |
| Q8C3X4 | GTP-binding protein GUF1 homolog                                                                                                                                                                                      | Guf1                  | 311 | 506 | 412 | 483 |
| Q5SPW0 | Vacuolar protein sorting-associated protein 54 (Tumor antigen SLP-8p homolog)                                                                                                                                         | Vps54                 | 36  | 28  | 13  | 15  |
| Q6A4J8 | Ubiquitin carboxyl-terminal hydrolase 7 (EC 3.1.2.15) (Ubiquitin thioesterase 7) (Ubiquitin-specific-processing protease 7) (Deubiquitinating enzyme 7) (Herpesvirus-associated ubiquitin-specific protease) (mHAUSP) | Usp7 (Hausp)          | 27  | 18  | 14  | 16  |
| P97820 | Mitogen-activated protein kinase kinase kinase kinase 4 (EC 2.7.11.1) (MAPK/ERK kinase kinase kinase 4) (MEK kinase kinase 4) (MEKKK 4) (HPK/GCK-like kinase HGK) (Nck-interacting kinase)                            | Map4k4 (Nik)          | 65  | 54  | 15  | 17  |
| P62270 | 40S ribosomal protein S18 (Ke-3) (Ke3)                                                                                                                                                                                | Rps18                 | 210 | 209 | 15  | 17  |
| P62908 | 40S ribosomal protein S3                                                                                                                                                                                              | Rps3                  | 778 | 762 | 39  | 44  |



|        |                                                                                                                                                                                                             |                            |      |      |     |     |
|--------|-------------------------------------------------------------------------------------------------------------------------------------------------------------------------------------------------------------|----------------------------|------|------|-----|-----|
| Q64311 | Protein N-terminal asparagine amidohydrolase (EC 3.5.1.-) (Protein NH2-terminal asparagine deamidase) (PNAD) (N-terminal Asn amidase) (NTN-amidase) (Protein NH2-terminal asparagine amidohydrolase) (PNAA) | Ntan1                      | 20   | 26   | 8   | 9   |
| P26618 | Alpha-type platelet-derived growth factor receptor (EC 2.7.10.1) (PDGF-R-alpha) (CD140 antigen-like family member A) (CD antigen CD140a)                                                                    | Pdgfra                     | 37   | 73   | 160 | 178 |
| P19253 | 60S ribosomal protein L13a (Transplantation antigen P198) (Tum-P198 antigen)                                                                                                                                | Rpl13a (P198) (Tstap198-7) | 27   | 65   | 9   | 10  |
| P62631 | Elongation factor 1-alpha 2 (EF-1-alpha-2) (Elongation factor 1 A-2) (eEF1A-2) (Statin S1)                                                                                                                  | Eef1a2 (Eef1a) (Stn)       | 1275 | 1549 | 258 | 285 |
| Q62446 | FK506-binding protein 3 (EC 5.2.1.8) (Peptidyl-prolyl cis-trans isomerase) (PPlase) (Rotamase) (25 kDa FKBP) (FKBP-25) (Rapamycin-selective 25 kDa immunophilin)                                            | Fkbp3 (Fkbp25)             | 31   | 31   | 10  | 11  |
| O55234 | Proteasome subunit beta type-5 (EC 3.4.25.1) (Proteasome epsilon chain) (Macropain epsilon chain) (Multicatalytic endopeptidase complex epsilon chain) (Proteasome subunit X) (Proteasome chain 6)          | Psmb5                      | 168  | 227  | 10  | 11  |
| Q9D8N0 | Elongation factor 1-gamma (EF-1-gamma) (eEF-1B gamma)                                                                                                                                                       | Eef1g                      | 31   | 85   | 11  | 12  |
| P19001 | Keratin, type I cytoskeletal 19 (Cytokeratin-19) (CK-19) (Keratin-19) (K19)                                                                                                                                 | Krt19 (Krt1-19)            | 37   | 46   | 11  | 12  |
| Q99KK9 | Probable histidyl-tRNA synthetase, mitochondrial (EC 6.1.1.21) (Histidine--tRNA ligase) (HisRS) (Histidine--tRNA ligase-like)                                                                               | Hars2 (Harsl)              | 20   | 41   | 22  | 24  |

|        |                                                                                                                                                                                                                                                                                                                                        |                                    |      |      |     |     |
|--------|----------------------------------------------------------------------------------------------------------------------------------------------------------------------------------------------------------------------------------------------------------------------------------------------------------------------------------------|------------------------------------|------|------|-----|-----|
| P07901 | Heat shock protein HSP 90-alpha (HSP 86) (Tumor-specific transplantation 86 kDa antigen) (TSTA)                                                                                                                                                                                                                                        | Hsp90aa1 (Hsp86) (Hsp86-1) (Hspca) | 1529 | 2324 | 134 | 146 |
| P38647 | Stress-70 protein, mitochondrial (75 kDa glucose-regulated protein) (GRP 75) (Heat shock 70 kDa protein 9) (Peptide-binding protein 74) (PBP74) (P66 MOT) (Mortalin)                                                                                                                                                                   | Hspa9 (Grp75) (Hsp74) (Hspa9a)     | 33   | 33   | 12  | 13  |
| P10126 | Elongation factor 1-alpha 1 (EF-1-alpha-1) (Elongation factor 1 A-1) (eEF1A-1) (Elongation factor Tu) (EF-Tu)                                                                                                                                                                                                                          | Eef1a1 (Eef1a)                     | 2004 | 2344 | 305 | 330 |
| P08113 | Endoplasmic (Heat shock protein 90 kDa beta member 1) (94 kDa glucose-regulated protein) (GRP94) (ERP99) (Polymorphic tumor rejection antigen 1) (Tumor rejection antigen gp96)                                                                                                                                                        | Hsp90b1 (Tra-1) (Tra1)             | 221  | 298  | 25  | 27  |
| P11984 | T-complex protein 1 subunit alpha A (TCP-1-alpha) (CCT-alpha) (Tailless complex polypeptide 1A) (TCP-1-A)                                                                                                                                                                                                                              | Cct1 (Ccta) (Tcp1)                 | 29   | 66   | 14  | 15  |
| P70398 | Probable ubiquitin carboxyl-terminal hydrolase FAF-X (EC 3.1.2.15) (Ubiquitin thioesterase FAF-X) (Ubiquitin-specific-processing protease FAF-X) (Deubiquitinating enzyme FAF-X) (Fat facets protein-related, X-linked) (Ubiquitin-specific protease 9, X chromosome) (Ubiquitin carboxyl-terminal hydrolase FAM) (Fat facets homolog) | Usp9x (Faf1) (Fam)                 | 42   | 28   | 57  | 61  |
| Q9DBR7 | Protein phosphatase 1 regulatory subunit 12A (Myosin phosphatase-targeting subunit 1) (Myosin phosphatase target subunit 1)                                                                                                                                                                                                            | Ppp1r12a (Mypt1)                   | 88   | 67   | 18  | 19  |
| P62242 | 40S ribosomal protein S8                                                                                                                                                                                                                                                                                                               | Rps8                               | 479  | 372  | 18  | 19  |
| P62281 | 40S ribosomal protein S11                                                                                                                                                                                                                                                                                                              | Rps11                              | 166  | 132  | 27  | 28  |

|        |                                                                                                                                                                                                        |                                    |      |      |     |     |
|--------|--------------------------------------------------------------------------------------------------------------------------------------------------------------------------------------------------------|------------------------------------|------|------|-----|-----|
| Q9JM05 | E3 SUMO-protein ligase PIAS4 (Protein inhibitor of activated STAT protein 4) (Protein inhibitor of activated STAT protein gamma) (PIAS-gamma) (PIASy)                                                  | Pias4 (Piasg)                      | 26   | 29   | 162 | 165 |
| P12367 | cAMP-dependent protein kinase type II-alpha regulatory subunit                                                                                                                                         | Prkar2a                            | 33   | 23   | 5   | 5   |
| Q9R1P1 | Proteasome subunit beta type-3 (EC 3.4.25.1) (Proteasome theta chain) (Proteasome chain 13) (Proteasome component C10-II)                                                                              | Psmb3                              | 87   | 135  | 7   | 7   |
| P30416 | FK506-binding protein 4 (EC 5.2.1.8) (Peptidyl-prolyl cis-trans isomerase) (PPIase) (Rotamase) (HSP-binding immunophilin) (HBI) (FKBP52 protein) (52 kDa FK506-binding protein) (FKBP59) (p59 protein) | Fkbp4                              | 40   | 62   | 8   | 8   |
| O09061 | Proteasome subunit beta type-1 (EC 3.4.25.1) (Proteasome component C5) (Macropain subunit C5) (Multicatalytic endopeptidase complex subunit C5) (Proteasome gamma chain)                               | Psmb1                              | 84   | 94   | 11  | 11  |
| Q9DB77 | Cytochrome b-c1 complex subunit 2, mitochondrial (Ubiquinol-cytochrome-c reductase complex core protein 2) (Core protein II) (Complex III subunit 2)                                                   | Uqcrc2                             | 29   | 20   | 13  | 13  |
| Q8R4K2 | Interleukin-1 receptor-associated kinase 4 (IRAK-4) (EC 2.7.11.1)                                                                                                                                      | Irak4                              | 32   | 47   | 22  | 22  |
| P11499 | Heat shock protein HSP 90-beta (HSP 84) (Tumor-specific transplantation 84 kDa antigen) (TSTA)                                                                                                         | Hsp90ab1 (Hsp84) (Hsp84-1) (Hspcb) | 2943 | 3523 | 208 | 205 |
| P58252 | Elongation factor 2 (EF-2)                                                                                                                                                                             | Eef2                               | 1630 | 1718 | 128 | 126 |

|        |                                                                                                                                                                                             |                                   |     |     |    |    |
|--------|---------------------------------------------------------------------------------------------------------------------------------------------------------------------------------------------|-----------------------------------|-----|-----|----|----|
| P23116 | Eukaryotic translation initiation factor 3 subunit A (eIF3a) (Eukaryotic translation initiation factor 3 subunit 10) (eIF-3-theta) (eIF3 p167) (eIF3 p180) (eIF3 p185) (p162) (Centrosomin) | Eif3a (Csma) (Eif3) (Eif3s10)     | 199 | 166 | 58 | 56 |
| P16406 | Glutamyl aminopeptidase (EC 3.4.11.7) (EAP) (Aminopeptidase A) (APA) (BP-1/6C3 antigen) (CD antigen CD249)                                                                                  | Enpep                             | 98  | 90  | 48 | 46 |
| Q8R1B4 | Eukaryotic translation initiation factor 3 subunit C (eIF3c) (Eukaryotic translation initiation factor 3 subunit 8) (eIF3 p110)                                                             | Eif3c (Eif3s8)                    | 34  | 63  | 22 | 21 |
| Q6ZPK0 | PHD finger protein 21A (BRAF35-HDAC complex protein BHC80) (mBHC80) (BHC80a)                                                                                                                | Phf21a (Bhc80) (Kiaa1696) (Pfff1) | 28  | 37  | 20 | 19 |
| Q9CPR4 | 60S ribosomal protein L17                                                                                                                                                                   | Rpl17                             | 187 | 135 | 15 | 14 |
| Q7TMY8 | E3 ubiquitin-protein ligase HUWE1 (EC 6.3.2.-) (HECT, UBA and WWE domain-containing protein 1) (Upstream regulatory element-binding protein 1) (URE-binding protein 1) (URE-B1) (E3Histone) | Huwe1 (Kiaa0312) (Ureb1)          | 33  | 91  | 39 | 36 |
| P35969 | Vascular endothelial growth factor receptor 1 (VEGFR-1) (EC 2.7.10.1) (Tyrosine-protein kinase receptor FLT) (FLT-1) (Embryonic receptor kinase 2)                                          | Flt1 (Emrk2) (Flt)                | 29  | 36  | 35 | 32 |
| Q01853 | Transitional endoplasmic reticulum ATPase (TER ATPase) (15S Mg(2+)-ATPase p97 subunit) (Valosin-containing protein) (VCP)                                                                   | Vcp                               | 691 | 699 | 56 | 51 |
| Q9WTR0 | Matrix metalloproteinase-16 (MMP-16) (EC 3.4.24.-) (Membrane-type matrix metalloproteinase 3) (MT-MMP 3) (MTMMP3) (Membrane-type-3 matrix metalloproteinase) (MT3-MMP) (MT3MMP)             | Mmp16                             | 17  | 36  | 11 | 10 |
| P03995 | Glial fibrillary acidic protein (GFAP)                                                                                                                                                      | Gfap                              | 63  | 90  | 22 | 20 |

|        |                                                                                                                                                                                 |                                    |     |      |    |    |
|--------|---------------------------------------------------------------------------------------------------------------------------------------------------------------------------------|------------------------------------|-----|------|----|----|
| Q8CGC7 | Bifunctional aminoacyl-tRNA synthetase [Includes: Glutamyl-tRNA synthetase (EC 6.1.1.17) (Glutamate--tRNA ligase); Prolyl-tRNA synthetase (EC 6.1.1.15) (Proline--tRNA ligase)] | Eprs (Qprs)                        | 130 | 102  | 32 | 29 |
| Q9QZH3 | Peptidyl-prolyl cis-trans isomerase E (PPIase E) (Rotamase E) (EC 5.2.1.8) (Cyclophilin E) (Cyclophilin-33)                                                                     | Ppie (Cyp33)                       | 28  | 35   | 10 | 9  |
| P02535 | Keratin, type I cytoskeletal 10 (Cytokeratin-10) (CK-10) (Keratin-10) (K10) (56 kDa cytokeratin) (Keratin, type I cytoskeletal 59 kDa)                                          | Krt10 (Krt1-10)                    | 252 | 152  | 19 | 17 |
| Q8BG95 | Protein phosphatase 1 regulatory subunit 12B (Myosin phosphatase-targeting subunit 2)                                                                                           | Ppp1r12b (Mypt2)                   | 25  | 24   | 25 | 22 |
| P70195 | Proteasome subunit beta type-7 (EC 3.4.25.1) (Proteasome subunit Z) (Macropain chain Z) (Multicatalytic endopeptidase complex chain Z)                                          | Psb7 (Mmc14)                       | 39  | 40   | 8  | 7  |
| Q02053 | Ubiquitin-like modifier-activating enzyme 1 (Ubiquitin-activating enzyme E1) (Ubiquitin-like modifier-activating enzyme 1 X) (Ubiquitin-activating enzyme E1 X)                 | Uba1 (Sbx) (Ube1) (Ube1ax) (Ube1x) | 660 | 1086 | 63 | 55 |
| Q11011 | Puromycin-sensitive aminopeptidase (PSA) (EC 3.4.11.-)                                                                                                                          | Npepps (Psa)                       | 71  | 141  | 30 | 26 |
| Q9Z1Q9 | Valyl-tRNA synthetase (EC 6.1.1.9) (Valine--tRNA ligase) (ValRS) (Protein G7a)                                                                                                  | Vars (Bat6) (G7a) (Vars2)          | 380 | 302  | 37 | 32 |
| Q9D868 | Peptidyl-prolyl cis-trans isomerase H (PPIase H) (Rotamase H) (EC 5.2.1.8)                                                                                                      | Ppih                               | 55  | 31   | 7  | 6  |
| P67984 | 60S ribosomal protein L22 (Heparin-binding protein HBp15)                                                                                                                       | Rpl22                              | 59  | 48   | 7  | 6  |
| O88866 | Hormonally up-regulated neu tumor-associated kinase (EC 2.7.11.1) (Serine/threonine-protein kinase MAK-V)                                                                       | Hunk (Makv)                        | 27  | 21   | 14 | 12 |
| P35979 | 60S ribosomal protein L12                                                                                                                                                       | Rpl12                              | 208 | 389  | 14 | 12 |
| Q9CZM2 | 60S ribosomal protein L15                                                                                                                                                       | Rpl15                              | 225 | 107  | 21 | 18 |

|        |                                                                                                                                                                                                             |                         |     |     |    |    |
|--------|-------------------------------------------------------------------------------------------------------------------------------------------------------------------------------------------------------------|-------------------------|-----|-----|----|----|
| Q6ZWN5 | 40S ribosomal protein S9                                                                                                                                                                                    | Rps9                    | 459 | 248 | 47 | 40 |
| Q9JM52 | Misshapen-like kinase 1 (EC 2.7.11.1) (Mitogen-activated protein kinase kinase kinase 6) (MAPK/ERK kinase kinase 6) (MEK kinase kinase 6) (MEKKK 6) (Misshapen/NIK-related kinase) (GCK family kinase MiNK) | Mink1 (Map4k6) (Mink)   | 18  | 54  | 13 | 11 |
| Q9CQN1 | Heat shock protein 75 kDa, mitochondrial (HSP 75) (Tumor necrosis factor type 1 receptor-associated protein) (TRAP-1) (TNFR-associated protein 1)                                                           | Trap1 (Hsp75)           | 197 | 335 | 13 | 11 |
| P14131 | 40S ribosomal protein S16                                                                                                                                                                                   | Rps16                   | 160 | 126 | 19 | 16 |
| P20029 | 78 kDa glucose-regulated protein (GRP 78) (Heat shock 70 kDa protein 5) (Immunoglobulin heavy chain-binding protein) (BiP)                                                                                  | Hspa5 (Grp78)           | 262 | 312 | 25 | 21 |
| P11983 | T-complex protein 1 subunit alpha B (TCP-1-alpha) (CCT-alpha) (Tailless complex polypeptide 1B) (TCP-1-B)                                                                                                   | Cct1 (Ccta) (Tcp1)      | 29  | 66  | 18 | 15 |
| Q64514 | Tripeptidyl-peptidase 2 (EC 3.4.14.10) (Tripeptidyl-peptidase II) (TPP-II) (Tripeptidyl aminopeptidase)                                                                                                     | Tpp2                    | 54  | 76  | 24 | 20 |
| P80316 | T-complex protein 1 subunit epsilon (TCP-1-epsilon) (CCT-epsilon)                                                                                                                                           | Cct5 (Ccte) (Kiaa0098)  | 239 | 102 | 17 | 14 |
| Q80ZW0 | Serine/threonine-protein kinase 35 (EC 2.7.11.1)                                                                                                                                                            | Stk35                   | 14  | 50  | 21 | 17 |
| Q64512 | Tyrosine-protein phosphatase non-receptor type 13 (EC 3.1.3.48) (Protein tyrosine phosphatase PTP-BL) (Protein-tyrosine phosphatase RIP) (Protein tyrosine phosphatase DPZPTP) (PTP36)                      | Ptpn13 (Ptp14)          | 28  | 27  | 26 | 21 |
| Q62407 | Striated muscle-specific serine/threonine protein kinase (EC 2.7.11.1) (Aortic preferentially expressed protein 1) (APEG-1)                                                                                 | Speg (Apeg1) (Kiaa1297) | 26  | 20  | 31 | 25 |

|        |                                                                                                                                                      |                               |     |     |    |    |
|--------|------------------------------------------------------------------------------------------------------------------------------------------------------|-------------------------------|-----|-----|----|----|
| Q9Z2U0 | Proteasome subunit alpha type-7 (EC 3.4.25.1) (Proteasome subunit RC6-1)                                                                             | PsmA7                         | 121 | 253 | 15 | 12 |
| P12970 | 60S ribosomal protein L7a (Surfeit locus protein 3)                                                                                                  | Rpl7a (Surf-3) (Surf3)        | 111 | 31  | 15 | 12 |
| Q8BP67 | 60S ribosomal protein L24                                                                                                                            | Rpl24                         | 354 | 214 | 24 | 19 |
| P63325 | 40S ribosomal protein S10                                                                                                                            | Rps10                         | 468 | 168 | 42 | 33 |
| P31254 | Ubiquitin-like modifier-activating enzyme 1 Y (Ubiquitin-activating enzyme E1 Y) (Ubiquitin-activating enzyme E1)                                    | Ube1ay (Sby) (Ube1y) (Ube1y1) | 161 | 77  | 22 | 17 |
| Q8CGK3 | Lon protease homolog, mitochondrial (EC 3.4.21.-) (Lon protease-like protein) (LONP) (Mitochondrial ATP-dependent protease Lon) (Serine protease 15) | Lonp1 (Prss15)                | 21  | 30  | 43 | 33 |
| P62702 | 40S ribosomal protein S4, X isoform                                                                                                                  | Rps4x (Rps4)                  | 402 | 304 | 30 | 23 |
| Q8JZQ2 | AFG3-like protein 2 (EC 3.4.24.-)                                                                                                                    | Afg3l2                        | 15  | 27  | 17 | 13 |
| P16627 | Heat shock 70 kDa protein 1L (Heat shock 70 kDa protein 1-like) (Heat shock 70 kDa-like protein 1) (Spermatid-specific heat shock protein 70)        | Hspa1l (Hsc70t)               | 319 | 238 | 33 | 25 |
| Q02956 | Protein kinase C zeta type (EC 2.7.11.13) (nPKC-zeta)                                                                                                | Prkcz (PkcZ)                  | 29  | 15  | 8  | 6  |
| Q3TXS7 | 26S proteasome non-ATPase regulatory subunit 1 (26S proteasome regulatory subunit RPN2) (26S proteasome regulatory subunit S1)                       | PsmD1                         | 100 | 89  | 16 | 12 |
| P62751 | 60S ribosomal protein L23a                                                                                                                           | Rpl23a                        | 75  | 49  | 16 | 12 |
| Q8K045 | Serine/threonine-protein kinase N3 (EC 2.7.11.13) (Protein kinase PKN-beta) (Protein-kinase C-related kinase 3)                                      | Pkn3 (Pknbeta)                | 130 | 126 | 36 | 27 |
| P62264 | 40S ribosomal protein S14                                                                                                                            | Rps14                         | 163 | 166 | 15 | 11 |
| P25444 | 40S ribosomal protein S2 (S4) (LLRep3 protein)                                                                                                       | Rps2 (Llrep3) (Rps4)          | 217 | 50  | 26 | 19 |

|        |                                                                                                                                                                                                   |                                                                  |     |     |    |    |
|--------|---------------------------------------------------------------------------------------------------------------------------------------------------------------------------------------------------|------------------------------------------------------------------|-----|-----|----|----|
| P62991 | Ubiquitin                                                                                                                                                                                         | Rps27a<br>(Uba80)<br>(Ubcep1);<br>Uba52<br>(Ubcep2);<br>Ubb; Ubc | 61  | 54  | 11 | 8  |
| Q61696 | Heat shock 70 kDa protein 1A (Heat shock 70 kDa protein 3) (HSP70.3) (Hsp68)                                                                                                                      | Hspa1a<br>(Hsp70-3)<br>(Hsp70A1)                                 | 266 | 236 | 33 | 24 |
| Q9CR57 | 60S ribosomal protein L14                                                                                                                                                                         | Rpl14                                                            | 508 | 391 | 33 | 24 |
| Q61699 | Heat shock protein 105 kDa (Heat shock-related 100 kDa protein E7I) (HSP-E7I) (Heat shock 110 kDa protein) (42 degrees C-HSP)                                                                     | Hsph1<br>(Hsp105)<br>(Hsp110)<br>(Kiaa0201)                      | 46  | 48  | 18 | 13 |
| P27659 | 60S ribosomal protein L3 (J1 protein)                                                                                                                                                             | Rpl3                                                             | 192 | 75  | 25 | 18 |
| Q60673 | Receptor-type tyrosine-protein phosphatase-like N (R-PTP-N) (PTP IA-2)                                                                                                                            | Ptpn (Ptp35)                                                     | 30  | 18  | 14 | 10 |
| P14148 | 60S ribosomal protein L7                                                                                                                                                                          | Rpl7                                                             | 145 | 52  | 14 | 10 |
| Q60692 | Proteasome subunit beta type-6 (EC 3.4.25.1) (Proteasome delta chain) (Macropain delta chain) (Multicatalytic endopeptidase complex delta chain) (Proteasome subunit Y)                           | Psm6<br>(Lmp19)                                                  | 33  | 89  | 17 | 12 |
| P51410 | 60S ribosomal protein L9                                                                                                                                                                          | Rpl9                                                             | 187 | 212 | 17 | 12 |
| Q8BMJ2 | Leucyl-tRNA synthetase, cytoplasmic (EC 6.1.1.4) (Leucine--tRNA ligase) (LeuRS)                                                                                                                   | Lars                                                             | 52  | 45  | 47 | 33 |
| Q7TQI3 | Ubiquitin thioesterase OTUB1 (EC 3.1.2.-) (Otubain-1) (OTU domain-containing ubiquitin aldehyde-binding protein 1) (Ubiquitin-specific-processing protease OTUB1) (Deubiquitinating enzyme OTUB1) | Otub1                                                            | 152 | 109 | 10 | 7  |
| Q91YJ5 | Translation initiation factor IF-2, mitochondrial (IF-2Mt) (IF2(mt)) (IF-2(Mt))                                                                                                                   | Mtif2                                                            | 29  | 23  | 13 | 9  |



|        |                                                                                                                                                                                                  |                              |     |     |    |    |
|--------|--------------------------------------------------------------------------------------------------------------------------------------------------------------------------------------------------|------------------------------|-----|-----|----|----|
| Q80TP3 | E3 ubiquitin-protein ligase UBR5 (EC 6.3.2.-) (E3 ubiquitin-protein ligase, HECT domain-containing 1) (Hyperplastic discs protein homolog)                                                       | Ubr5 (Edd) (Edd1) (Kiaa0896) | 27  | 17  | 43 | 29 |
| Q8C9S8 | Cysteine protease ATG4A (EC 3.4.22.-) (Autophagy-related protein 4 homolog A) (Autophagin-2) (Autophagy-related cysteine endopeptidase 2) (AUT-like 2 cysteine endopeptidase)                    | Atg4a (Apg4a) (Autl2)        | 26  | 21  | 6  | 4  |
| Q8CAY6 | Acetyl-CoA acetyltransferase, cytosolic (EC 2.3.1.9) (Cytosolic acetoacetyl-CoA thiolase)                                                                                                        | Acat2                        | 65  | 18  | 9  | 6  |
| P42932 | T-complex protein 1 subunit theta (TCP-1-theta) (CCT-theta)                                                                                                                                      | Cct8 (Cctq)                  | 197 | 57  | 23 | 15 |
| O70435 | Proteasome subunit alpha type-3 (EC 3.4.25.1) (Proteasome component C8) (Macropain subunit C8) (Multicatalytic endopeptidase complex subunit C8) (Proteasome subunit K)                          | Psma3                        | 95  | 76  | 14 | 9  |
| Q9CXW4 | 60S ribosomal protein L11                                                                                                                                                                        | Rpl11                        | 72  | 79  | 11 | 7  |
| Q80U87 | Ubiquitin carboxyl-terminal hydrolase 8 (EC 3.1.2.15) (Ubiquitin thioesterase 8) (Ubiquitin-specific-processing protease 8) (Deubiquitinating enzyme 8) (mUBPy)                                  | Usp8 (Kiaa0055) (Ubpy)       | 29  | 23  | 24 | 15 |
| P62717 | 60S ribosomal protein L18a                                                                                                                                                                       | Rpl18a                       | 242 | 62  | 21 | 13 |
| P17156 | Heat shock-related 70 kDa protein 2 (Heat shock protein 70.2)                                                                                                                                    | Hspa2 (Hcp70.2) (Hsp70-2)    | 964 | 544 | 60 | 37 |
| P84099 | 60S ribosomal protein L19                                                                                                                                                                        | Rpl19                        | 39  | 47  | 13 | 8  |
| P62301 | 40S ribosomal protein S13                                                                                                                                                                        | Rps13                        | 77  | 100 | 23 | 14 |
| Q9D1R9 | 60S ribosomal protein L34                                                                                                                                                                        | Rpl34                        | 34  | 32  | 10 | 6  |
| Q8R4K8 | Pappalysin-1 (EC 3.4.24.79) (Pregnancy-associated plasma protein A) (PAPP-A) (Insulin-like growth factor-dependent IGF-binding protein 4 protease) (IGF-dependent IGFBP-4 protease) (IGFBP-4ase) | Pappa                        | 41  | 43  | 25 | 15 |

|        |                                                                                                                                                                          |                             |      |     |     |    |
|--------|--------------------------------------------------------------------------------------------------------------------------------------------------------------------------|-----------------------------|------|-----|-----|----|
| Q6NZJ6 | Eukaryotic translation initiation factor 4 gamma 1 (eIF-4-gamma 1) (eIF-4G 1) (eIF-4G1)                                                                                  | Eif4g1                      | 47   | 113 | 30  | 18 |
| P63038 | 60 kDa heat shock protein, mitochondrial (Heat shock protein 60) (HSP-60) (Hsp60) (60 kDa chaperonin) (Chaperonin 60) (CPN60) (Mitochondrial matrix protein P1) (HSP-65) | Hspd1 (Hsp60)               | 15   | 32  | 22  | 13 |
| P80317 | T-complex protein 1 subunit zeta (TCP-1-zeta) (CCT-zeta) (CCT-zeta-1)                                                                                                    | Cct6a (Cct6) (Cctz) (Cctz1) | 160  | 52  | 22  | 13 |
| P10630 | Eukaryotic initiation factor 4A-II (eIF-4A-II) (eIF4A-II) (EC 3.6.1.-) (ATP-dependent RNA helicase eIF4A-2)                                                              | Eif4a2 (Ddx2b)              | 194  | 78  | 17  | 10 |
| P63017 | Heat shock cognate 71 kDa protein (Heat shock 70 kDa protein 8)                                                                                                          | Hspa8 (Hsc70) (Hsc73)       | 1719 | 959 | 119 | 70 |
| P05532 | Mast/stem cell growth factor receptor (SCFR) (EC 2.7.10.1) (Proto-oncogene tyrosine-protein kinase Kit) (c-kit) (CD antigen CD117)                                       | Kit (SI)                    | 16   | 35  | 12  | 7  |
| P62900 | 60S ribosomal protein L31                                                                                                                                                | Rpl31                       | 124  | 62  | 12  | 7  |
| Q9JI78 | Peptide-N(4)-(N-acetyl-beta-glucosaminy)asparagine amidase (PNGase) (mPNGase) (EC 3.5.1.52) (Peptide:N-glycanase) (N-glycanase 1)                                        | Ngly1                       | 29   | 32  | 19  | 11 |
| P41105 | 60S ribosomal protein L28                                                                                                                                                | Rpl28                       | 49   | 41  | 19  | 11 |
| Q9CZX8 | 40S ribosomal protein S19                                                                                                                                                | Rps19                       | 206  | 146 | 19  | 11 |
| P47963 | 60S ribosomal protein L13 (A52)                                                                                                                                          | Rpl13                       | 744  | 379 | 47  | 27 |
| P49722 | Proteasome subunit alpha type-2 (EC 3.4.25.1) (Proteasome component C3) (Macropain subunit C3) (Multicatalytic endopeptidase complex subunit C3)                         | Psma2 (Lmpc3)               | 188  | 103 | 16  | 9  |
| P97461 | 40S ribosomal protein S5                                                                                                                                                 | Rps5                        | 89   | 33  | 32  | 18 |

|            |        |                                                                                                                                       |                     |     |     |    |    |
|------------|--------|---------------------------------------------------------------------------------------------------------------------------------------|---------------------|-----|-----|----|----|
|            | P63073 | Eukaryotic translation initiation factor 4E (eIF-4E) (eIF4E) (mRNA cap-binding protein) (eIF-4F 25 kDa subunit)                       | Eif4e               | 110 | 25  | 9  | 5  |
|            | Q61390 | T-complex protein 1 subunit zeta-2 (TCP-1-zeta-2) (CCT-zeta-2) (Cctz-2)                                                               | Cct6b               | 55  | 52  | 15 | 8  |
|            | P97351 | 40S ribosomal protein S3a                                                                                                             | Rps3a               | 899 | 392 | 50 | 26 |
|            | Q80UE6 | Serine/threonine-protein kinase WNK4 (EC 2.7.11.1) (Protein kinase with no lysine 4) (Protein kinase, lysine-deficient 4)             | Wnk4 (Prkwnk4)      | 23  | 33  | 29 | 15 |
| DNA repair | P97311 | DNA replication licensing factor MCM6 (Mis5 homolog)                                                                                  | Mcm6 (Mcmd6) (Mis5) | 110 | 395 | 20 | 38 |
|            | P06745 | Glucose-6-phosphate isomerase (GPI) (EC 5.3.1.9) (Phosphoglucose isomerase) (PGI) (Phosphohexose isomerase) (PHI) (Neuroleukin) (NLK) | Gpi (Gpi1)          | 39  | 107 | 12 | 22 |
|            | Q7TSG3 | F-box only protein 5 (Early mitotic inhibitor 1)                                                                                      | Fbxo5 (Emi1)        | 15  | 27  | 5  | 9  |
|            | P56198 | Cell death activator CIDE-3 (Cell death-inducing DFFA-like effector protein C) (Fat-specific protein FSP27)                           | Cidec (Fsp27)       | 51  | 39  | 8  | 14 |
|            | Q9R117 | Non-receptor tyrosine-protein kinase TYK2 (EC 2.7.10.2)                                                                               | Tyk2                | 27  | 30  | 15 | 26 |
|            | Q9Z129 | ATP-dependent DNA helicase Q1 (EC 3.6.1.-) (DNA-dependent ATPase Q1)                                                                  | Recql (Recql1)      | 17  | 27  | 13 | 22 |
|            | Q9ERK4 | Exportin-2 (Exp2) (Importin-alpha re-exporter) (Chromosome segregation 1-like protein)                                                | Cse1l (Xpo2)        | 42  | 153 | 26 | 44 |
|            | P57776 | Elongation factor 1-delta (EF-1-delta)                                                                                                | Eef1d               | 109 | 35  | 3  | 5  |
|            | Q8BHG1 | Nardilysin (EC 3.4.24.61) (N-arginine dibasic convertase) (NRD convertase) (NRD-C)                                                    | Nrd1                | 53  | 54  | 13 | 21 |
|            | Q501J6 | Probable ATP-dependent RNA helicase DDX17 (EC 3.6.1.-) (DEAD box protein 17)                                                          | Ddx17               | 90  | 43  | 7  | 11 |

|        |                                                                                                                                                                                                                                                       |                                                        |     |     |    |    |
|--------|-------------------------------------------------------------------------------------------------------------------------------------------------------------------------------------------------------------------------------------------------------|--------------------------------------------------------|-----|-----|----|----|
| Q61990 | Poly(rC)-binding protein 2 (Alpha-CP2) (Putative heterogeneous nuclear ribonucleoprotein X) (hnRNP X) (CTBP) (CBP)                                                                                                                                    | Pcbp2 (Cbp) (HnrnpX) (Hnrpx)                           | 29  | 194 | 7  | 11 |
| Q8CCP0 | Serologically defined colon cancer antigen 1 homolog                                                                                                                                                                                                  | Sdccag1                                                | 37  | 31  | 21 | 33 |
| P63158 | High mobility group protein B1 (High mobility group protein 1) (HMG-1)                                                                                                                                                                                | Hmgb1 (Hmg-1) (Hmg1)                                   | 153 | 405 | 25 | 38 |
| Q8BUG5 | Calcyphosin-2 (Calcyphosine-2)                                                                                                                                                                                                                        | Caps2                                                  | 17  | 28  | 8  | 12 |
| P97868 | Retinoblastoma-binding protein 6 (p53-associated cellular protein of testis) (Proliferation potential-related protein) (Protein P2P-R)                                                                                                                | Rbbp6 (P2pr) (Pact)                                    | 21  | 29  | 24 | 35 |
| P35761 | Dual specificity protein kinase TTK (ESK) (PYT) (EC 2.7.12.1)                                                                                                                                                                                         | Ttk (Esk)                                              | 14  | 34  | 9  | 13 |
| Q8BVI4 | Dihydropteridine reductase (EC 1.5.1.34) (HDHPR) (Quinoid dihydropteridine reductase)                                                                                                                                                                 | Qdpr (Dhpr)                                            | 144 | 277 | 7  | 10 |
| O35711 | Liprin-beta-2 (Protein tyrosine phosphatase receptor type f polypeptide-interacting protein-binding protein 2) (PTPRF-interacting protein-binding protein 2) (Coiled-coil-like protein 1)                                                             | Ppfibp2 (Cclp1)                                        | 108 | 79  | 14 | 20 |
| Q9WVP9 | Interferon-induced GTP-binding protein Mx2 (Myxovirus resistance protein 2)                                                                                                                                                                           | Mx2                                                    | 32  | 22  | 14 | 20 |
| P27641 | ATP-dependent DNA helicase 2 subunit 2 (EC 3.6.1.-) (ATP-dependent DNA helicase II 80 kDa subunit) (Ku autoantigen protein p86 homolog) (Ku80) (CTC box-binding factor 85 kDa subunit) (CTCBF) (CTC85) (Nuclear factor IV) (DNA repair protein XRCC5) | Xrcc5 (G22p2)                                          | 22  | 29  | 16 | 22 |
| Q99M73 | Keratin, type II cuticular Hb4 (Type II hair keratin Hb4) (Keratin-84) (K84) (65 kDa type II keratin)                                                                                                                                                 | Krt84 (Krt2-16) (Krt84) (K84) (65 kDa type II keratin) | 36  | 74  | 14 | 19 |

|        |                                                                                                                                                                                                                                                                                                                    |                                   |      |      |     |     |
|--------|--------------------------------------------------------------------------------------------------------------------------------------------------------------------------------------------------------------------------------------------------------------------------------------------------------------------|-----------------------------------|------|------|-----|-----|
| Q61846 | Maternal embryonic leucine zipper kinase (EC 2.7.11.1) (Protein kinase PK38) (mPK38)                                                                                                                                                                                                                               | Melk (Kiaa0175) (Pk38)            | 28   | 32   | 10  | 13  |
| Q7TQ07 | DNA polymerase nu (EC 2.7.7.7)                                                                                                                                                                                                                                                                                     | Poln                              | 20   | 39   | 14  | 18  |
| Q61496 | Probable ATP-dependent RNA helicase DDX4 (EC 3.6.1.-) (DEAD box protein 4) (Vasa homolog) (Mvh)                                                                                                                                                                                                                    | Ddx4 (Vasa)                       | 17   | 25   | 44  | 56  |
| P20152 | Vimentin                                                                                                                                                                                                                                                                                                           | Vim                               | 1749 | 2397 | 125 | 157 |
| Q63ZW7 | InaD-like protein (Inadl protein) (Pals1-associated tight junction protein) (Protein associated to tight junctions) (Channel-interacting PDZ domain-containing protein)                                                                                                                                            | Inadl (Cipp) (Patj)               | 18   | 30   | 12  | 15  |
| Q61316 | Heat shock 70 kDa protein 4 (Heat shock 70-related protein APG-2)                                                                                                                                                                                                                                                  | Hspa4 (Apg2) (Hsp110)             | 379  | 792  | 42  | 52  |
| O35618 | Protein Mdm4 (p53-binding protein Mdm4) (Mdm2-like p53-binding protein) (Protein Mdmx) (Double minute 4 protein)                                                                                                                                                                                                   | Mdm4 (Mdmx)                       | 17   | 29   | 5   | 6   |
| Q9QWY8 | 130 kDa phosphatidylinositol 4,5-biphosphate-dependent ARF1 GTPase-activating protein (PIP2-dependent ARF1 GAP) (ADP-ribosylation factor-directed GTPase-activating protein 1) (ARF GTPase-activating protein 1) (Development and differentiation-enhancing factor 1) (Differentiation-enhancing factor 1) (DEF-1) | Ddef1 (Asap1) (Kiaa1249) (Shag1)  | 26   | 23   | 14  | 16  |
| P97820 | Mitogen-activated protein kinase kinase kinase 4 (EC 2.7.11.1) (MAPK/ERK kinase kinase kinase 4) (MEK kinase kinase 4) (MEKKK 4) (HPK/GCK-like kinase HGK) (Nck-interacting kinase)                                                                                                                                | Map4k4 (Nik)                      | 65   | 54   | 15  | 17  |
| P41230 | Histone demethylase JARID1C (EC 1.14.11.-) (Jumonji/ARID domain-containing protein 1C) (Protein SmcX) (Protein Xe169)                                                                                                                                                                                              | Jarid1c (Kiaa0234) (Smcx) (Xe169) | 34   | 32   | 26  | 29  |

|        |                                                                                                                                                                                                                     |                                        |     |     |     |     |
|--------|---------------------------------------------------------------------------------------------------------------------------------------------------------------------------------------------------------------------|----------------------------------------|-----|-----|-----|-----|
| P26618 | Alpha-type platelet-derived growth factor receptor (EC 2.7.10.1) (PDGF-R-alpha) (CD140 antigen-like family member A) (CD antigen CD140a)                                                                            | Pdgfra                                 | 37  | 73  | 160 | 178 |
| O35973 | Period circadian protein homolog 1 (Circadian clock protein PERIOD 1) (Circadian pacemaker protein Rigi) (mPER1)                                                                                                    | Per1 (Per) (Rigi)                      | 29  | 21  | 27  | 28  |
| P62281 | 40S ribosomal protein S11                                                                                                                                                                                           | Rps11                                  | 166 | 132 | 27  | 28  |
| Q9R190 | Metastasis-associated protein MTA2 (Metastasis-associated 1-like 1)                                                                                                                                                 | Mta2 (Mta11)                           | 27  | 26  | 9   | 9   |
| Q6P5F9 | Exportin-1 (Exp1) (Chromosome region maintenance 1 protein homolog)                                                                                                                                                 | Xpo1 (Crm1)                            | 19  | 43  | 9   | 9   |
| P23116 | Eukaryotic translation initiation factor 3 subunit A (eIF3a) (Eukaryotic translation initiation factor 3 subunit 10) (eIF-3-theta) (eIF3 p167) (eIF3 p180) (eIF3 p185) (p162) (Centrosomin)                         | Eif3a (Csm) (Eif3) (Eif3s10)           | 199 | 166 | 58  | 56  |
| Q8R4B8 | NACHT, LRR and PYD domains-containing protein 3 (Cold autoinflammatory syndrome 1 protein homolog) (Cryopyrin) (PYRIN-containing APAF1-like protein 1) (Mast cell maturation-associated-inducible protein 1)        | Nlrp3 (Cias1) (Mmig1) (Nalp3) (Pypaf1) | 30  | 20  | 24  | 23  |
| Q91V92 | ATP-citrate synthase (EC 2.3.3.8) (ATP-citrate (pro-S)-lyase) (Citrate cleavage enzyme)                                                                                                                             | Acly                                   | 349 | 488 | 45  | 43  |
| Q99PF4 | Cadherin-23 (Otocadherin)                                                                                                                                                                                           | Cdh23                                  | 29  | 32  | 29  | 27  |
| Q8CGC6 | RNA-binding protein 28 (RNA-binding motif protein 28)                                                                                                                                                               | Rbm28                                  | 24  | 41  | 71  | 66  |
| Q8VDD5 | Myosin-9 (Myosin heavy chain 9) (Myosin heavy chain, non-muscle IIa) (Non-muscle myosin heavy chain IIa) (NMMHC II-a) (NMMHC-IIA) (Cellular myosin heavy chain, type A) (Non-muscle myosin heavy chain-A) (NMMHC-A) | Myh9                                   | 780 | 839 | 127 | 115 |

|        |                                                                                                                                                    |                           |     |     |    |    |
|--------|----------------------------------------------------------------------------------------------------------------------------------------------------|---------------------------|-----|-----|----|----|
| P43406 | Integrin alpha-V (Vitronectin receptor subunit alpha) (CD antigen CD51) [Cleaved into: Integrin alpha-V heavy chain; Integrin alpha-V light chain] | Itgav                     | 23  | 35  | 19 | 17 |
| Q9QXA7 | Tripartite motif-containing protein 44 (Protein DIPB) (Protein Mc7)                                                                                | Trim44 (Dipb)             | 28  | 23  | 18 | 16 |
| P26041 | Moesin (Membrane-organizing extension spike protein)                                                                                               | Msn                       | 136 | 127 | 44 | 39 |
| Q99104 | Myosin-Va (Dilute myosin heavy chain, non-muscle)                                                                                                  | Myo5a (Dilute)            | 28  | 34  | 35 | 31 |
| Q9R0P5 | Destrin (Actin-depolymerizing factor) (ADF) (Sid 23)                                                                                               | Dstn (Dsn) (Sid23)        | 61  | 81  | 8  | 7  |
| Q99PG2 | Opioid growth factor receptor (OGFr) (Zeta-type opioid receptor)                                                                                   | Ogfr                      | 38  | 24  | 8  | 7  |
| Q924C1 | Exportin-5 (Exp5) (Ran-binding protein 21)                                                                                                         | Xpo5 (Kiaa1291) (Ranbp21) | 20  | 62  | 15 | 13 |
| Q9CYF5 | Williams-Beuren syndrome chromosomal region 16 protein homolog                                                                                     | Wbscr16                   | 38  | 28  | 7  | 6  |
| P97784 | Cryptochrome-1                                                                                                                                     | Cry1                      | 52  | 42  | 21 | 18 |
| Q9R194 | Cryptochrome-2                                                                                                                                     | Cry2 (Kiaa0658)           | 52  | 42  | 21 | 18 |
| Q6ZWN5 | 40S ribosomal protein S9                                                                                                                           | Rps9                      | 459 | 248 | 47 | 40 |
| Q64514 | Tripeptidyl-peptidase 2 (EC 3.4.14.10) (Tripeptidyl-peptidase II) (TPP-II) (Tripeptidyl aminopeptidase)                                            | Tpp2                      | 54  | 76  | 24 | 20 |
| P11531 | Dystrophin                                                                                                                                         | Dmd                       | 25  | 16  | 66 | 55 |
| P09405 | Nucleolin (Protein C23)                                                                                                                            | Ncl (Nuc)                 | 775 | 872 | 78 | 65 |
| Q9Z1M8 | Protein Red (Protein RER) (IK factor) (Cytokine IK)                                                                                                | Ik (Red) (Rer)            | 29  | 23  | 10 | 8  |
| Q80UN9 | tRNA isopentenyltransferase, mitochondrial (IPTase) (EC 2.5.1.8) (Isopentenyl-diphosphate:tRNA isopentenyltransferase) (IPP transferase) (IPPT)    | Trit1 (lpt)               | 31  | 24  | 19 | 15 |
| P63325 | 40S ribosomal protein S10                                                                                                                          | Rps10                     | 468 | 168 | 42 | 33 |
| Q7TMK6 | Protein Hook homolog 2                                                                                                                             | Hook2                     | 33  | 36  | 26 | 20 |

|        |                                                                                                                                                                                                                                                                                                        |                          |     |     |    |    |
|--------|--------------------------------------------------------------------------------------------------------------------------------------------------------------------------------------------------------------------------------------------------------------------------------------------------------|--------------------------|-----|-----|----|----|
| Q3TXS7 | 26S proteasome non-ATPase regulatory subunit 1 (26S proteasome regulatory subunit RPN2) (26S proteasome regulatory subunit S1)                                                                                                                                                                         | Psmc1                    | 100 | 89  | 16 | 12 |
| P62264 | 40S ribosomal protein S14                                                                                                                                                                                                                                                                              | Rps14                    | 163 | 166 | 15 | 11 |
| Q99LG2 | Transportin-2 (Karyopherin beta-2b)                                                                                                                                                                                                                                                                    | Tnpo2                    | 42  | 32  | 7  | 5  |
| Q60673 | Receptor-type tyrosine-protein phosphatase-like N (R-PTP-N) (PTP IA-2)                                                                                                                                                                                                                                 | Ptprn (Ptp35)            | 30  | 18  | 14 | 10 |
| Q03172 | Zinc finger protein 40 (Transcription factor alphaA-CRYBP1) (Alpha A-crystallin-binding protein I) (Alpha A-CRYBP1)                                                                                                                                                                                    | Hivep1 (Cryabp1) (Znf40) | 25  | 24  | 21 | 15 |
| P08551 | Neurofilament light polypeptide (NF-L) (Neurofilament triplet L protein) (68 kDa neurofilament protein)                                                                                                                                                                                                | Nefl (Nf68) (Nfl)        | 51  | 36  | 17 | 12 |
| Q91YJ5 | Translation initiation factor IF-2, mitochondrial (IF-2Mt) (IF2(mt)) (IF-2(Mt))                                                                                                                                                                                                                        | Mtif2                    | 29  | 23  | 13 | 9  |
| O88444 | Adenylate cyclase type 1 (EC 4.6.1.1) (Adenylate cyclase type I) (ATP pyrophosphate-lyase 1) (Adenylyl cyclase 1) (Ca(2+)/calmodulin-activated adenylyl cyclase)                                                                                                                                       | Adcy1                    | 33  | 31  | 26 | 17 |
| Q61983 | Sodium-dependent phosphate transport protein 1 (Sodium/phosphate cotransporter 1) (Na(+)/Pi cotransporter 1) (Solute carrier family 17 member 1) (Renal sodium-dependent phosphate transport protein 1) (Renal sodium-phosphate transport protein 1) (Renal Na(+)-dependent phosphate cotransporter 1) | Slc17a1 (Npt1)           | 31  | 33  | 8  | 5  |
| P62301 | 40S ribosomal protein S13                                                                                                                                                                                                                                                                              | Rps13                    | 77  | 100 | 23 | 14 |
| Q6NZJ6 | Eukaryotic translation initiation factor 4 gamma 1 (eIF-4-gamma 1) (eIF-4G 1) (eIF-4G1)                                                                                                                                                                                                                | Eif4g1                   | 47  | 113 | 30 | 18 |



|                  |        |                                                                                                                                                                                                       |                           |     |     |    |    |
|------------------|--------|-------------------------------------------------------------------------------------------------------------------------------------------------------------------------------------------------------|---------------------------|-----|-----|----|----|
|                  | P63038 | 60 kDa heat shock protein, mitochondrial (Heat shock protein 60) (HSP-60) (Hsp60) (60 kDa chaperonin) (Chaperonin 60) (CPN60) (Mitochondrial matrix protein P1) (HSP-65)                              | Hspd1 (Hsp60)             | 15  | 32  | 22 | 13 |
|                  | Q8K2I9 | F-box only protein 18 (EC 3.6.1.-) (F-box DNA helicase 1)                                                                                                                                             | Fbxo18 (Fbh1) (Fbx18)     | 30  | 23  | 9  | 5  |
|                  | Q8BHK0 | Paraneoplastic antigen Ma2 homolog                                                                                                                                                                    | Pnma2                     | 36  | 22  | 9  | 5  |
|                  | O35664 | Interferon-alpha/beta receptor beta chain (Interferon alpha/beta receptor 2) (IFN-alpha-REC) (Type I interferon receptor) (IFN-R)                                                                     | Ifnar2                    | 37  | 21  | 11 | 6  |
| Cation transport | Q3TCT4 | Ectonucleoside triphosphate diphosphohydrolase 7 (NTPDase 7) (EC 3.6.1.-) (Lysosomal apyrase-like protein 1)                                                                                          | Entpd7 (Kiaa4066) (Lalp1) | 16  | 33  | 42 | 80 |
|                  | P97311 | DNA replication licensing factor MCM6 (Mis5 homolog)                                                                                                                                                  | Mcm6 (Mcmd6) (Mis5)       | 110 | 395 | 20 | 38 |
|                  | Q64674 | Spermidine synthase (SPDSY) (EC 2.5.1.16) (Putrescine aminopropyltransferase)                                                                                                                         | Srm                       | 55  | 29  | 4  | 7  |
|                  | O35381 | Acidic leucine-rich nuclear phosphoprotein 32 family member A (Potent heat-stable protein phosphatase 2A inhibitor I1PP2A) (Acidic nuclear phosphoprotein pp32) (Leucine-rich acidic nuclear protein) | Anp32a (Anp32) (Lanp)     | 36  | 112 | 8  | 14 |
|                  | Q9Z1R2 | Large proline-rich protein BAT3 (HLA-B-associated transcript 3)                                                                                                                                       | Bat3                      | 80  | 49  | 15 | 26 |
|                  | Q9R117 | Non-receptor tyrosine-protein kinase TYK2 (EC 2.7.10.2)                                                                                                                                               | Tyk2                      | 27  | 30  | 15 | 26 |
|                  | P63143 | Voltage-gated potassium channel subunit beta-1 (K(+)-channel subunit beta-1) (Kv-beta-1)                                                                                                              | Kcnab1 (Kvb1)             | 29  | 76  | 12 | 20 |

|        |                                                                                                                                                                          |                                                                                                                                                                               |     |      |    |    |
|--------|--------------------------------------------------------------------------------------------------------------------------------------------------------------------------|-------------------------------------------------------------------------------------------------------------------------------------------------------------------------------|-----|------|----|----|
| P62806 | Histone H4                                                                                                                                                               | Hist1h4a;<br>Hist1h4b (H4-53); Hist1h4c (H4-12);<br>Hist1h4d;<br>Hist1h4f;<br>Hist1h4h;<br>Hist1h4i;<br>Hist1h4j;<br>Hist1h4k;<br>Hist1h4m;<br>Hist2h4a (Hist2h4);<br>Hist4h4 | 815 | 1617 | 47 | 78 |
| Q922U2 | Keratin, type II cytoskeletal 5 (Cytokeratin-5) (CK-5) (Keratin-5) (K5)                                                                                                  | Krt5 (Krt2-5)                                                                                                                                                                 | 396 | 550  | 23 | 38 |
| P15532 | Nucleoside diphosphate kinase A (NDP kinase A) (NDK A) (EC 2.7.4.6) (Tumor metastatic process-associated protein) (Metastasis inhibition factor NM23) (NDPK-A) (nm23-M1) | Nme1 (Nm23)                                                                                                                                                                   | 150 | 261  | 8  | 13 |
| Q8VDM4 | 26S proteasome non-ATPase regulatory subunit 2 (26S proteasome regulatory subunit RPN1) (26S proteasome regulatory subunit S2) (26S proteasome subunit p97)              | Psm2                                                                                                                                                                          | 113 | 157  | 18 | 29 |
| Q80Y17 | Lethal(2) giant larvae protein homolog 1 (LLGL) (Mlg1) (Mgl-1)                                                                                                           | Llg1 (Llg1h)                                                                                                                                                                  | 30  | 29   | 7  | 11 |
| Q9Z1S0 | Mitotic checkpoint serine/threonine-protein kinase BUB1 beta (EC 2.7.11.1) (MAD3/BUB1-related protein kinase) (Mitotic checkpoint kinase MAD3L)                          | Bub1b (Mad3l)                                                                                                                                                                 | 20  | 41   | 15 | 23 |
| P50247 | Adenosylhomocysteinase (AdoHcyase) (EC 3.3.1.1) (S-adenosyl-L-homocysteine hydrolase) (Liver copper-binding protein) (CUBP)                                              | Ahcy                                                                                                                                                                          | 90  | 106  | 10 | 15 |

|        |                                                                                                                                                                                           |                             |      |      |     |     |
|--------|-------------------------------------------------------------------------------------------------------------------------------------------------------------------------------------------|-----------------------------|------|------|-----|-----|
| P83741 | Serine/threonine-protein kinase WNK1 (EC 2.7.11.1) (Protein kinase with no lysine 1) (Protein kinase, lysine-deficient 1)                                                                 | Wnk1 (Prkwnk1)              | 56   | 36   | 18  | 27  |
| O35711 | Liprin-beta-2 (Protein tyrosine phosphatase receptor type f polypeptide-interacting protein-binding protein 2) (PTPRF-interacting protein-binding protein 2) (Coiled-coil-like protein 1) | Ppfibp2 (Cclp1)             | 108  | 79   | 14  | 20  |
| O08677 | Kininogen-1 [Cleaved into: Kininogen-1 heavy chain; Bradykinin; Kininogen-1 light chain]                                                                                                  | Kng1 (Kng)                  | 26   | 21   | 5   | 7   |
| P70696 | Histone H2B type 1-A (Histone H2B, testis) (Testis-specific histone H2B)                                                                                                                  | Hist1h2ba (Th2b)            | 146  | 378  | 37  | 51  |
| Q61789 | Laminin subunit alpha-3 (Nicein subunit alpha)                                                                                                                                            | Lama3                       | 26   | 26   | 37  | 50  |
| P35700 | Peroxiredoxin-1 (EC 1.11.1.15) (Thioredoxin peroxidase 2) (Thioredoxin-dependent peroxide reductase 2) (Osteoblast-specific factor 3) (OSF-3) (Macrophage 23 kDa stress protein)          | Prdx1 (Msp23) (Paga) (Tdp2) | 836  | 1095 | 75  | 99  |
| Q61846 | Maternal embryonic leucine zipper kinase (EC 2.7.11.1) (Protein kinase PK38) (mPK38)                                                                                                      | Melk (Kiaa0175) (Pk38)      | 28   | 32   | 10  | 13  |
| P20152 | Vimentin                                                                                                                                                                                  | Vim                         | 1749 | 2397 | 125 | 157 |
| P17183 | Gamma-enolase (EC 4.2.1.11) (2-phospho-D-glycerate hydro-lyase) (Neural enolase) (Neuron-specific enolase) (NSE) (Enolase 2)                                                              | Eno2 (Eno-2)                | 228  | 181  | 12  | 15  |
| Q811J3 | Iron-responsive element-binding protein 2 (IRE-BP 2) (Iron regulatory protein 2) (IRP2)                                                                                                   | Ireb2 (Irp2)                | 69   | 119  | 142 | 176 |
| Q8BU30 | Isoleucyl-tRNA synthetase, cytoplasmic (EC 6.1.1.5) (Isoleucine--tRNA ligase) (IleRS) (IRS)                                                                                               | Iars                        | 85   | 46   | 30  | 37  |
| Q8R2X8 | Golgin-45 (Basic leucine zipper nuclear factor 1)                                                                                                                                         | Blzf1                       | 28   | 22   | 13  | 16  |

|        |                                                                                                                                                                                         |                            |     |     |    |    |
|--------|-----------------------------------------------------------------------------------------------------------------------------------------------------------------------------------------|----------------------------|-----|-----|----|----|
| Q8BGD9 | Eukaryotic translation initiation factor 4B (eIF-4B)                                                                                                                                    | Eif4b                      | 238 | 306 | 13 | 16 |
| P49025 | Citron Rho-interacting kinase (CRIK) (EC 2.7.11.1) (Rho-interacting, serine/threonine-protein kinase 21)                                                                                | Cit                        | 49  | 67  | 67 | 81 |
| P47754 | F-actin-capping protein subunit alpha-2 (CapZ alpha-2)                                                                                                                                  | Capza2 (Cappa2)            | 60  | 33  | 5  | 6  |
| Q8VHS2 | Crumbs homolog 1                                                                                                                                                                        | Crb1                       | 23  | 28  | 10 | 12 |
| P54227 | Stathmin (Phosphoprotein p19) (pp19) (Leukemia-associated phosphoprotein p18) (Oncoprotein 18) (Op18) (pp17) (Prosolin) (Metablastin) (Protein Pr22) (Leukemia-associated gene protein) | Stmn1 (Lag) (Lap18) (Pr22) | 121 | 120 | 10 | 12 |
| Q8BFY9 | Transportin-1 (Importin beta-2) (Karyopherin beta-2)                                                                                                                                    | Tnpo1 (Kpnb2)              | 54  | 43  | 10 | 12 |
| Q9QUR6 | Prolyl endopeptidase (PE) (EC 3.4.21.26) (Post-proline cleaving enzyme)                                                                                                                 | Prep (Pep)                 | 56  | 20  | 15 | 18 |
| Q9JKF1 | Ras GTPase-activating-like protein IQGAP1                                                                                                                                               | Iqgap1                     | 19  | 81  | 21 | 25 |
| Q9R0K7 | Plasma membrane calcium-transporting ATPase 2 (PMCA2) (EC 3.6.3.8) (Plasma membrane calcium ATPase isoform 2) (Plasma membrane calcium pump isoform 2)                                  | Atp2b2 (Pmca2)             | 32  | 27  | 70 | 83 |
| Q80XA6 | RalBP1-associated Eps domain-containing protein 2 (RalBP1-interacting protein 2) (Partner of RalBP1)                                                                                    | Reps2 (Pob1)               | 33  | 31  | 6  | 7  |
| Q9WUM4 | Coronin-1C (Coronin-3)                                                                                                                                                                  | Coro1c                     | 42  | 28  | 18 | 21 |
| P49718 | DNA replication licensing factor MCM5 (CDC46 homolog) (P1-CDC46)                                                                                                                        | Mcm5 (Cdc46) (Mcmd5)       | 40  | 20  | 18 | 21 |
| Q5SPW0 | Vacuolar protein sorting-associated protein 54 (Tumor antigen SLP-8p homolog)                                                                                                           | Vps54                      | 36  | 28  | 13 | 15 |
| Q62418 | Drebrin-like protein (SH3 domain-containing protein 7) (Actin-binding protein 1)                                                                                                        | Dbnl (Abp1) (Sh3p7)        | 24  | 39  | 7  | 8  |
| Q9Z2K1 | Keratin, type I cytoskeletal 16 (Cytokeratin-16) (CK-16) (Keratin-16) (K16)                                                                                                             | Krt16 (Krt1-16)            | 37  | 37  | 7  | 8  |

|        |                                                                                                                                                                                            |                                    |      |      |     |     |
|--------|--------------------------------------------------------------------------------------------------------------------------------------------------------------------------------------------|------------------------------------|------|------|-----|-----|
| P97820 | Mitogen-activated protein kinase kinase kinase kinase 4 (EC 2.7.11.1) (MAPK/ERK kinase kinase kinase 4) (MEK kinase kinase 4) (MEKKK 4) (HPK/GCK-like kinase HGK) (Nck-interacting kinase) | Map4k4 (Nik)                       | 65   | 54   | 15  | 17  |
| P55200 | Histone-lysine N-methyltransferase HRX (EC 2.1.1.43) (Zinc finger protein HRX) (ALL-1)                                                                                                     | Mll (All1) (Hrx) (Mll1)            | 67   | 26   | 39  | 44  |
| Q9WUU9 | 80 kDa MCM3-associated protein (Protein GANP)                                                                                                                                              | Mcm3ap (Ganp) (Map80)              | 48   | 32   | 17  | 19  |
| Q9WUF3 | CASP8-associated protein 2 (FLICE-associated huge protein)                                                                                                                                 | Casp8ap2 (Flash)                   | 28   | 16   | 26  | 29  |
| P41230 | Histone demethylase JARID1C (EC 1.14.11.-) (Jumonji/ARID domain-containing protein 1C) (Protein SmcX) (Protein Xe169)                                                                      | Jarid1c (Kiaa0234) (Smcx) (Xe169)  | 34   | 32   | 26  | 29  |
| Q62446 | FK506-binding protein 3 (EC 5.2.1.8) (Peptidyl-prolyl cis-trans isomerase) (PPlase) (Rotamase) (25 kDa FKBP) (FKBP-25) (Rapamycin-selective 25 kDa immunophilin)                           | Fkbp3 (Fkbp25)                     | 31   | 31   | 10  | 11  |
| Q9ET77 | Junctophilin-3 (Junctophilin type 3) (JP-3)                                                                                                                                                | Jph3 (Jp3)                         | 37   | 31   | 20  | 22  |
| P49717 | DNA replication licensing factor MCM4 (CDC21 homolog) (P1-CDC21)                                                                                                                           | Mcm4 (Cdc21) (Mcmd4)               | 29   | 18   | 11  | 12  |
| P07901 | Heat shock protein HSP 90-alpha (HSP 86) (Tumor-specific transplantation 86 kDa antigen) (TSTA)                                                                                            | Hsp90aa1 (Hsp86) (Hsp86-1) (Hspca) | 1529 | 2324 | 134 | 146 |
| P70298 | Homeobox protein cut-like 2 (Cut-like 2) (Homeobox protein Cux-2)                                                                                                                          | Cux2 (Cutl2)                       | 30   | 22   | 12  | 13  |
| Q8BKC5 | Importin-5 (Imp5) (Importin subunit beta-3) (Karyopherin beta-3) (Ran-binding protein 5) (RanBP5)                                                                                          | Ipo5 (Kpnb3) (Ranbp5)              | 185  | 91   | 12  | 13  |

|        |                                                                                                                                                                                                                                                                                                                                        |                                    |     |     |     |     |
|--------|----------------------------------------------------------------------------------------------------------------------------------------------------------------------------------------------------------------------------------------------------------------------------------------------------------------------------------------|------------------------------------|-----|-----|-----|-----|
| Q9Z104 | SWI/SNF-related matrix-associated actin-dependent regulator of chromatin subfamily E member 1-related (SMARCE1-related protein) (HMG box-containing protein 20B) (Structural DNA-binding protein BRAF35) (BRCA2-associated factor 35)                                                                                                  | Hmg20b (Braf35) (Hmgx2) (Smarce1r) | 30  | 20  | 14  | 15  |
| P11984 | T-complex protein 1 subunit alpha A (TCP-1-alpha) (CCT-alpha) (Tailless complex polypeptide 1A) (TCP-1-A)                                                                                                                                                                                                                              | Cct1 (Ccta) (Tcp1)                 | 29  | 66  | 14  | 15  |
| P70398 | Probable ubiquitin carboxyl-terminal hydrolase FAF-X (EC 3.1.2.15) (Ubiquitin thioesterase FAF-X) (Ubiquitin-specific-processing protease FAF-X) (Deubiquitinating enzyme FAF-X) (Fat facets protein-related, X-linked) (Ubiquitin-specific protease 9, X chromosome) (Ubiquitin carboxyl-terminal hydrolase FAM) (Fat facets homolog) | Usp9x (Faf1) (Fam)                 | 42  | 28  | 57  | 61  |
| Q920R0 | Alsin (Amyotrophic lateral sclerosis protein 2 homolog)                                                                                                                                                                                                                                                                                | Als2                               | 74  | 88  | 72  | 75  |
| Q6P4S8 | Integrator complex subunit 1 (Int1)                                                                                                                                                                                                                                                                                                    | Ints1                              | 25  | 33  | 26  | 27  |
| O35973 | Period circadian protein homolog 1 (Circadian clock protein PERIOD 1) (Circadian pacemaker protein Rigui) (mPER1)                                                                                                                                                                                                                      | Per1 (Per) (Rigui)                 | 29  | 21  | 27  | 28  |
| Q9JM05 | E3 SUMO-protein ligase PIAS4 (Protein inhibitor of activated STAT protein 4) (Protein inhibitor of activated STAT protein gamma) (PIAS-gamma) (PIASy)                                                                                                                                                                                  | Pias4 (Piasg)                      | 26  | 29  | 162 | 165 |
| P26350 | Prothymosin alpha [Cleaved into: Thymosin alpha]                                                                                                                                                                                                                                                                                       | Ptma                               | 34  | 120 | 2   | 2   |
| P62141 | Serine/threonine-protein phosphatase PP1-beta catalytic subunit (PP-1B) (EC 3.1.3.16)                                                                                                                                                                                                                                                  | Ppp1cb                             | 177 | 57  | 4   | 4   |
| Q8VCZ3 | THAP domain-containing protein 7                                                                                                                                                                                                                                                                                                       | Thap7                              | 26  | 18  | 6   | 6   |

|        |                                                                                                                                                                                                              |                                        |      |      |     |     |
|--------|--------------------------------------------------------------------------------------------------------------------------------------------------------------------------------------------------------------|----------------------------------------|------|------|-----|-----|
| Q8VC28 | Aldo-keto reductase family 1 member C13 (EC 1.1.1.-)                                                                                                                                                         | Akr1c13                                | 32   | 23   | 8   | 8   |
| Q99LX0 | Protein DJ-1 (Parkinson disease protein 7 homolog)                                                                                                                                                           | Park7                                  | 53   | 178  | 9   | 9   |
| Q9D289 | Trafficking protein particle complex subunit 6B                                                                                                                                                              | Trappc6b                               | 62   | 69   | 9   | 9   |
| Q61092 | Laminin subunit gamma-2 (Laminin 5 gamma 2 subunit) (Kalinin/nicein/epiligrin 100 kDa subunit) (Laminin B2t chain)                                                                                           | Lamc2                                  | 33   | 29   | 13  | 13  |
| P25206 | DNA replication licensing factor MCM3 (DNA polymerase alpha holoenzyme-associated protein P1) (P1-MCM3)                                                                                                      | Mcm3 (Mcmd) (Mcmd3)                    | 74   | 185  | 15  | 15  |
| Q6P8J7 | Creatine kinase, sarcomeric mitochondrial (EC 2.7.3.2) (S-MtCK)                                                                                                                                              | Ckmt2                                  | 50   | 66   | 26  | 26  |
| P58252 | Elongation factor 2 (EF-2)                                                                                                                                                                                   | Eef2                                   | 1630 | 1718 | 128 | 126 |
| Q91YE5 | Bromodomain adjacent to zinc finger domain protein 2A (Transcription termination factor I-interacting protein 5) (TTF-I-interacting protein 5) (Tip5)                                                        | Baz2a (Tip5)                           | 36   | 15   | 56  | 55  |
| Q9QXL1 | Kinesin-like protein KIF21B (Kinesin-like protein KIF6)                                                                                                                                                      | Kif21b (Kif6)                          | 22   | 45   | 26  | 25  |
| Q8R4B8 | NACHT, LRR and PYD domains-containing protein 3 (Cold autoinflammatory syndrome 1 protein homolog) (Cryopyrin) (PYRIN-containing APAF1-like protein 1) (Mast cell maturation-associated-inducible protein 1) | Nlrp3 (Cias1) (Mmig1) (Nalp3) (Pypaf1) | 30   | 20   | 24  | 23  |
| Q91V92 | ATP-citrate synthase (EC 2.3.3.8) (ATP-citrate (pro-S)-lyase) (Citrate cleavage enzyme)                                                                                                                      | Acly                                   | 349  | 488  | 45  | 43  |
| Q8R1B4 | Eukaryotic translation initiation factor 3 subunit C (eIF3c) (Eukaryotic translation initiation factor 3 subunit 8) (eIF3 p110)                                                                              | Eif3c (Eif3s8)                         | 34   | 63   | 22  | 21  |
| P30275 | Creatine kinase, ubiquitous mitochondrial (EC 2.7.3.2) (U-MtCK) (Acidic-type mitochondrial creatine kinase) (Mia-CK)                                                                                         | Ckmt1                                  | 205  | 121  | 32  | 30  |

|        |                                                                                                                                                                                                                     |                          |      |      |     |     |
|--------|---------------------------------------------------------------------------------------------------------------------------------------------------------------------------------------------------------------------|--------------------------|------|------|-----|-----|
| Q04447 | Creatine kinase B-type (EC 2.7.3.2) (Creatine kinase B chain) (B-CK)                                                                                                                                                | Ckb (Ckbb)               | 9079 | 7277 | 434 | 406 |
| Q9CPR4 | 60S ribosomal protein L17                                                                                                                                                                                           | Rpl17                    | 187  | 135  | 15  | 14  |
| Q9D6Z1 | Nucleolar protein 5A (Nucleolar protein Nop56)                                                                                                                                                                      | Nol5a (Nop56)            | 38   | 39   | 14  | 13  |
| Q7TMY8 | E3 ubiquitin-protein ligase HUWE1 (EC 6.3.2.-) (HECT, UBA and WWE domain-containing protein 1) (Upstream regulatory element-binding protein 1) (URE-binding protein 1) (URE-B1) (E3Histone)                         | Huwe1 (Kiaa0312) (Ureb1) | 33   | 91   | 39  | 36  |
| Q01853 | Transitional endoplasmic reticulum ATPase (TER ATPase) (15S Mg(2+)-ATPase p97 subunit) (Valosin-containing protein) (VCP)                                                                                           | Vcp                      | 691  | 699  | 56  | 51  |
| P03995 | Glial fibrillary acidic protein (GFAP)                                                                                                                                                                              | Gfap                     | 63   | 90   | 22  | 20  |
| Q8CGC7 | Bifunctional aminoacyl-tRNA synthetase [Includes: Glutamyl-tRNA synthetase (EC 6.1.1.17) (Glutamate--tRNA ligase); Prolyl-tRNA synthetase (EC 6.1.1.15) (Proline--tRNA ligase)]                                     | Eprs (Qprs)              | 130  | 102  | 32  | 29  |
| Q8VDD5 | Myosin-9 (Myosin heavy chain 9) (Myosin heavy chain, non-muscle IIa) (Non-muscle myosin heavy chain IIa) (NMMHC II-a) (NMMHC-IIA) (Cellular myosin heavy chain, type A) (Non-muscle myosin heavy chain-A) (NMMHC-A) | Myh9                     | 780  | 839  | 127 | 115 |
| P07310 | Creatine kinase M-type (EC 2.7.3.2) (Creatine kinase M chain) (M-CK)                                                                                                                                                | Ckm (Ckmm)               | 73   | 107  | 31  | 28  |
| Q9QZH3 | Peptidyl-prolyl cis-trans isomerase E (PPIase E) (Rotamase E) (EC 5.2.1.8) (Cyclophilin E) (Cyclophilin-33)                                                                                                         | Ppie (Cyp33)             | 28   | 35   | 10  | 9   |
| Q91VX2 | Ubiquitin-associated protein 2 (Protein lingerer homolog 1) (MLig-1)                                                                                                                                                | Ubp2 (Lig1)              | 60   | 41   | 10  | 9   |
| P26041 | Moesin (Membrane-organizing extension spike protein)                                                                                                                                                                | Msn                      | 136  | 127  | 44  | 39  |
| Q68FD5 | Clathrin heavy chain 1                                                                                                                                                                                              | Cltc                     | 944  | 884  | 88  | 78  |



|        |                                                                                                                                                                                                             |                                    |     |      |    |    |
|--------|-------------------------------------------------------------------------------------------------------------------------------------------------------------------------------------------------------------|------------------------------------|-----|------|----|----|
| Q9R0P5 | Destrin (Actin-depolymerizing factor) (ADF) (Sid 23)                                                                                                                                                        | Dstn (Dsn) (Sid23)                 | 61  | 81   | 8  | 7  |
| Q02053 | Ubiquitin-like modifier-activating enzyme 1 (Ubiquitin-activating enzyme E1) (Ubiquitin-like modifier-activating enzyme 1 X) (Ubiquitin-activating enzyme E1 X)                                             | Uba1 (Sbx) (Ube1) (Ube1ax) (Ube1x) | 660 | 1086 | 63 | 55 |
| Q11011 | Puromycin-sensitive aminopeptidase (PSA) (EC 3.4.11.-)                                                                                                                                                      | Npepps (Psa)                       | 71  | 141  | 30 | 26 |
| Q9D868 | Peptidyl-prolyl cis-trans isomerase H (PPIase H) (Rotamase H) (EC 5.2.1.8)                                                                                                                                  | Ppih                               | 55  | 31   | 7  | 6  |
| O88866 | Hormonally up-regulated neu tumor-associated kinase (EC 2.7.11.1) (Serine/threonine-protein kinase MAK-V)                                                                                                   | Hunk (Makv)                        | 27  | 21   | 14 | 12 |
| Q9JM52 | Misshapen-like kinase 1 (EC 2.7.11.1) (Mitogen-activated protein kinase kinase kinase 6) (MAPK/ERK kinase kinase 6) (MEK kinase kinase 6) (MEKKK 6) (Misshapen/NIK-related kinase) (GCK family kinase MiNK) | Mink1 (Map4k6) (Mink)              | 18  | 54   | 13 | 11 |
| P20029 | 78 kDa glucose-regulated protein (GRP 78) (Heat shock 70 kDa protein 5) (Immunoglobulin heavy chain-binding protein) (BiP)                                                                                  | Hspa5 (Grp78)                      | 262 | 312  | 25 | 21 |
| P11983 | T-complex protein 1 subunit alpha B (TCP-1-alpha) (CCT-alpha) (Tailless complex polypeptide 1B) (TCP-1-B)                                                                                                   | Cct1 (Ccta) (Tcp1)                 | 29  | 66   | 18 | 15 |
| P11531 | Dystrophin                                                                                                                                                                                                  | Dmd                                | 25  | 16   | 66 | 55 |
| Q91XQ0 | Dynein heavy chain 8, axonemal (Axonemal beta dynein heavy chain 8) (Ciliary dynein heavy chain 8)                                                                                                          | Dnahc8                             | 47  | 51   | 77 | 64 |

|        |                                                                                                                                                                                                                                                                |                               |     |     |     |     |
|--------|----------------------------------------------------------------------------------------------------------------------------------------------------------------------------------------------------------------------------------------------------------------|-------------------------------|-----|-----|-----|-----|
| Q8R429 | Sarcoplasmic/endoplasmic reticulum calcium ATPase 1 (SERCA1) (EC 3.6.3.8) (Calcium pump 1) (Calcium-transporting ATPase sarcoplasmic reticulum type, fast twitch skeletal muscle isoform) (SR Ca(2+)-ATPase 1) (Endoplasmic reticulum class 1/2 Ca(2+) ATPase) | Atp2a1                        | 25  | 17  | 17  | 14  |
| P80316 | T-complex protein 1 subunit epsilon (TCP-1-epsilon) (CCT-epsilon)                                                                                                                                                                                              | Cct5 (Ccte) (Kiaa0098)        | 239 | 102 | 17  | 14  |
| Q6DFV7 | Nuclear receptor coactivator 7                                                                                                                                                                                                                                 | Ncoa7                         | 25  | 16  | 11  | 9   |
| Q569Z5 | Probable ATP-dependent RNA helicase DDX46 (EC 3.6.1.-) (DEAD box protein 46)                                                                                                                                                                                   | Ddx46 (Kiaa0801)              | 25  | 17  | 21  | 17  |
| Q80ZW0 | Serine/threonine-protein kinase 35 (EC 2.7.11.1)                                                                                                                                                                                                               | Stk35                         | 14  | 50  | 21  | 17  |
| P54923 | [Protein ADP-ribosylarginine] hydrolase (ADP-ribosylarginine hydrolase) (EC 3.2.2.19) (ADP-ribose-L-arginine cleaving enzyme)                                                                                                                                  | Adprh (Arh1)                  | 20  | 41  | 15  | 12  |
| P00342 | L-lactate dehydrogenase C chain (LDH-C) (EC 1.1.1.27) (LDH testis subunit) (LDH-X)                                                                                                                                                                             | Ldhc (Ldh-3) (Ldh3)           | 97  | 122 | 15  | 12  |
| P12970 | 60S ribosomal protein L7a (Surfeit locus protein 3)                                                                                                                                                                                                            | Rpl7a (Surf-3) (Surf3)        | 111 | 31  | 15  | 12  |
| Q91ZU6 | Bullous pemphigoid antigen 1, isoforms 1/2/3/4 (BPA) (Hemidesmosomal plaque protein) (Dystonia musculorum protein) (Dystonin)                                                                                                                                  | Dst (Bpag1)                   | 78  | 38  | 126 | 100 |
| P62754 | 40S ribosomal protein S6 (Phosphoprotein NP33)                                                                                                                                                                                                                 | Rps6                          | 127 | 283 | 19  | 15  |
| P63325 | 40S ribosomal protein S10                                                                                                                                                                                                                                      | Rps10                         | 468 | 168 | 42  | 33  |
| Q8VHK5 | Membrane protein MLC1                                                                                                                                                                                                                                          | Mlc1                          | 35  | 25  | 22  | 17  |
| P31254 | Ubiquitin-like modifier-activating enzyme 1 Y (Ubiquitin-activating enzyme E1 Y) (Ubiquitin-activating enzyme E1)                                                                                                                                              | Ube1ay (Sby) (Ube1y) (Ube1y1) | 161 | 77  | 22  | 17  |
| Q9CZW4 | Long-chain-fatty-acid--CoA ligase 3 (EC 6.2.1.3) (Long-chain acyl-CoA synthetase 3) (LACS 3)                                                                                                                                                                   | Acsl3 (Acs3) (FacI3)          | 41  | 37  | 13  | 10  |

|        |                                                                                                                                                                                                                            |                                       |      |      |     |     |
|--------|----------------------------------------------------------------------------------------------------------------------------------------------------------------------------------------------------------------------------|---------------------------------------|------|------|-----|-----|
| Q8CGK3 | Lon protease homolog, mitochondrial (EC 3.4.21.-) (Lon protease-like protein) (LONP) (Mitochondrial ATP-dependent protease Lon) (Serine protease 15)                                                                       | Lonp1 (Prss15)                        | 21   | 30   | 43  | 33  |
| Q99MY8 | Probable histone-lysine N-methyltransferase ASH1L (EC 2.1.1.43) (Absent small and homeotic disks protein 1 homolog) (ASH1-like protein)                                                                                    | Ash1l                                 | 19   | 31   | 46  | 35  |
| P16627 | Heat shock 70 kDa protein 1L (Heat shock 70 kDa protein 1-like) (Heat shock 70 kDa-like protein 1) (Spermatid-specific heat shock protein 70)                                                                              | Hspa1l (Hsc70t)                       | 319  | 238  | 33  | 25  |
| O70228 | Probable phospholipid-transporting ATPase IIA (EC 3.6.3.1) (ATPase class II type 9A)                                                                                                                                       | Atp9a                                 | 31   | 29   | 37  | 28  |
| Q9QYB1 | Chloride intracellular channel protein 4 (mc3s5/mtCLIC)                                                                                                                                                                    | Clic4                                 | 28   | 33   | 4   | 3   |
| Q9DBP5 | UMP-CMP kinase (EC 2.7.4.14) (Cytidylate kinase) (Deoxycytidylate kinase) (Cytidine monophosphate kinase) (Uridine monophosphate kinase) (Uridine monophosphate/cytidine monophosphate kinase) (UMP/CMP kinase) (UMP/CMPK) | Cmpk1 (Cmk) (Cmpk) (Uck) (Umk) (Umpk) | 107  | 93   | 12  | 9   |
| Q3TXS7 | 26S proteasome non-ATPase regulatory subunit 1 (26S proteasome regulatory subunit RPN2) (26S proteasome regulatory subunit S1)                                                                                             | Psmc1                                 | 100  | 89   | 16  | 12  |
| P62751 | 60S ribosomal protein L23a                                                                                                                                                                                                 | Rpl23a                                | 75   | 49   | 16  | 12  |
| Q4VGL6 | Roquin (RING finger and C3H zinc finger protein 1) (Protein Sanroque)                                                                                                                                                      | Rc3h1 (Gm551) (Kiaa2025)              | 54   | 54   | 23  | 17  |
| P60710 | Actin, cytoplasmic 1 (Beta-actin)                                                                                                                                                                                          | Actb                                  | 5140 | 4496 | 282 | 208 |
| Q61656 | Probable ATP-dependent RNA helicase DDX5 (EC 3.6.1.-) (DEAD box protein 5) (RNA helicase p68) (DEAD box RNA helicase DEAD1) (mDEAD1)                                                                                       | Ddx5 (Tnz2)                           | 90   | 43   | 11  | 8   |

|        |                                                                                                                            |                            |      |      |     |     |
|--------|----------------------------------------------------------------------------------------------------------------------------|----------------------------|------|------|-----|-----|
| Q91Z67 | SLIT-ROBO Rho GTPase-activating protein 2 (srGAP2) (Formin-binding protein 2) (Formin-binding protein 27) (FBP-27)         | Srgap2 (Fbp27) (Fbnp2)     | 77   | 48   | 11  | 8   |
| Q61696 | Heat shock 70 kDa protein 1A (Heat shock 70 kDa protein 3) (HSP70.3) (Hsp68)                                               | Hspa1a (Hsp70-3) (Hsp70A1) | 266  | 236  | 33  | 24  |
| Q9CR57 | 60S ribosomal protein L14                                                                                                  | Rpl14                      | 508  | 391  | 33  | 24  |
| P27659 | 60S ribosomal protein L3 (J1 protein)                                                                                      | Rpl3                       | 192  | 75   | 25  | 18  |
| Q8BX70 | Vacuolar protein sorting-associated protein 13C                                                                            | Vps13c (Kiaa3021)          | 25   | 17   | 53  | 38  |
| Q9CQ65 | S-methyl-5'-thioadenosine phosphorylase (EC 2.4.2.28) (5'-methylthioadenosine phosphorylase) (MTA phosphorylase) (MTAPase) | Mtap                       | 48   | 36   | 7   | 5   |
| Q60673 | Receptor-type tyrosine-protein phosphatase-like N (R-PTP-N) (PTP IA-2)                                                     | Ptpn (Ptp35)               | 30   | 18   | 14  | 10  |
| Q8BMJ2 | Leucyl-tRNA synthetase, cytoplasmic (EC 6.1.1.4) (Leucine--tRNA ligase) (LeuRS)                                            | Lars                       | 52   | 45   | 47  | 33  |
| P61294 | Ras-related protein Rab-6B                                                                                                 | Rab6b (D9Bwg0185e)         | 18   | 53   | 10  | 7   |
| Q8CD91 | SPARC-related modular calcium-binding protein 2 (Secreted modular calcium-binding protein 2) (SMOC-2)                      | Smoc2                      | 29   | 16   | 16  | 11  |
| P61979 | Heterogeneous nuclear ribonucleoprotein K (hnRNP K)                                                                        | Hnrnpk (Hnrpk)             | 225  | 46   | 18  | 12  |
| Q9Z0T6 | Polycystic kidney disease and receptor for egg jelly-related protein (PKD and REJ homolog)                                 | Pkdrej                     | 32   | 32   | 18  | 12  |
| P61164 | Alpha-centractin (Centractin) (Centrosome-associated actin homolog) (Actin-RPV) (ARP1)                                     | Actr1a (Ctrn1)             | 247  | 124  | 27  | 18  |
| P68033 | Actin, alpha cardiac muscle 1 (Alpha-cardiac actin)                                                                        | Actc1 (Actc)               | 3948 | 2726 | 234 | 155 |
| P61161 | Actin-related protein 2 (Actin-like protein 2)                                                                             | Actr2 (Arp2)               | 247  | 124  | 28  | 18  |
| Q9CXW4 | 60S ribosomal protein L11                                                                                                  | Rpl11                      | 72   | 79   | 11  | 7   |

|        |                                                                                                                                                                                                                                                                                                        |                                    |      |     |     |    |
|--------|--------------------------------------------------------------------------------------------------------------------------------------------------------------------------------------------------------------------------------------------------------------------------------------------------------|------------------------------------|------|-----|-----|----|
| Q8CG48 | Structural maintenance of chromosomes protein 2 (Chromosome-associated protein E) (XCAP-E homolog) (FGF-inducible protein 16)                                                                                                                                                                          | Smc2 (Cape) (Fin16) (Smc2l1)       | 32   | 36  | 41  | 26 |
| Q61983 | Sodium-dependent phosphate transport protein 1 (Sodium/phosphate cotransporter 1) (Na(+)/PI cotransporter 1) (Solute carrier family 17 member 1) (Renal sodium-dependent phosphate transport protein 1) (Renal sodium-phosphate transport protein 1) (Renal Na(+)-dependent phosphate cotransporter 1) | Slc17a1 (Npt1)                     | 31   | 33  | 8   | 5  |
| P16125 | L-lactate dehydrogenase B chain (LDH-B) (EC 1.1.1.27) (LDH heart subunit) (LDH-H)                                                                                                                                                                                                                      | Ldhb (Ldh-2) (Ldh2)                | 315  | 214 | 34  | 21 |
| Q3UXZ6 | Protein FAM81A                                                                                                                                                                                                                                                                                         | Fam81a                             | 22   | 27  | 13  | 8  |
| O35551 | Rab GTPase-binding effector protein 1 (Rabaptin-5) (Rabaptin-5alpha)                                                                                                                                                                                                                                   | Rabep1 (Rab5ep) (Rabpt5) (Rabpt5a) | 33   | 26  | 26  | 16 |
| Q6NZJ6 | Eukaryotic translation initiation factor 4 gamma 1 (eIF-4-gamma 1) (eIF-4G 1) (eIF-4G1)                                                                                                                                                                                                                | Eif4g1                             | 47   | 113 | 30  | 18 |
| P63017 | Heat shock cognate 71 kDa protein (Heat shock 70 kDa protein 8)                                                                                                                                                                                                                                        | Hspa8 (Hsc70) (Hsc73)              | 1719 | 959 | 119 | 70 |
| P62900 | 60S ribosomal protein L31                                                                                                                                                                                                                                                                              | Rpl31                              | 124  | 62  | 12  | 7  |
| Q9QUK4 | Baculoviral IAP repeat-containing protein 1b (Neuronal apoptosis inhibitory protein 2)                                                                                                                                                                                                                 | Naip2 (Birc1b) (Naip-rs6)          | 21   | 28  | 14  | 8  |
| P26043 | Radixin (ESP10)                                                                                                                                                                                                                                                                                        | Rdx                                | 127  | 106 | 23  | 13 |
| P63073 | Eukaryotic translation initiation factor 4E (eIF-4E) (eIF4E) (mRNA cap-binding protein) (eIF-4F 25 kDa subunit)                                                                                                                                                                                        | Eif4e                              | 110  | 25  | 9   | 5  |

|                         |        |                                                                                                                                                                        |                    |     |     |    |    |
|-------------------------|--------|------------------------------------------------------------------------------------------------------------------------------------------------------------------------|--------------------|-----|-----|----|----|
|                         | Q9WTU3 | Sodium channel protein type 8 subunit alpha (Sodium channel protein type VIII subunit alpha) (Voltage-gated sodium channel subunit alpha Nav1.6)                       | Scn8a (Nbna1)      | 28  | 19  | 20 | 11 |
|                         | O35664 | Interferon-alpha/beta receptor beta chain (Interferon alpha/beta receptor 2) (IFN-alpha-REC) (Type I interferon receptor) (IFN-R)                                      | Ifnar2             | 37  | 21  | 11 | 6  |
|                         | Q9WUJ8 | Origin recognition complex subunit 6                                                                                                                                   | Orc6l (Orc6)       | 59  | 37  | 13 | 7  |
|                         | O88844 | Isocitrate dehydrogenase [NADP] cytoplasmic (IDH) (EC 1.1.1.42) (Cytosolic NADP-isocitrate dehydrogenase) (Oxalosuccinate decarboxylase) (NADP(+)-specific ICDH) (IDP) | Idh1               | 155 | 163 | 15 | 8  |
| MHCII-mediated immunity | P06745 | Glucose-6-phosphate isomerase (GPI) (EC 5.3.1.9) (Phosphoglucose isomerase) (PGI) (Phosphohexose isomerase) (PHI) (Neuroleukin) (NLK)                                  | Gpi (Gpi1)         | 39  | 107 | 12 | 22 |
|                         | Q9R117 | Non-receptor tyrosine-protein kinase TYK2 (EC 2.7.10.2)                                                                                                                | Tyk2               | 27  | 30  | 15 | 26 |
|                         | Q501J6 | Probable ATP-dependent RNA helicase DDX17 (EC 3.6.1.-) (DEAD box protein 17)                                                                                           | Ddx17              | 90  | 43  | 7  | 11 |
|                         | P63001 | Ras-related C3 botulinum toxin substrate 1 (p21-Rac1)                                                                                                                  | Rac1               | 31  | 99  | 7  | 11 |
|                         | Q8K386 | Ras-related protein Rab-15                                                                                                                                             | Rab15              | 44  | 74  | 4  | 6  |
|                         | Q60695 | Ral guanine nucleotide dissociation stimulator-like 1 (RalGDS-like 1)                                                                                                  | Rgl1 (Rgl)         | 26  | 15  | 4  | 6  |
|                         | Q7TQG1 | Pleckstrin homology domain-containing family A member 6 (Phosphoinositol 3-phosphate-binding protein 3) (PEPP-3)                                                       | Plekha6 (Pepp3)    | 17  | 37  | 14 | 21 |
|                         | Q99K85 | Phosphoserine aminotransferase (PSAT) (EC 2.6.1.52) (Phosphohydroxythreonine aminotransferase) (Endometrial progesterone-induced protein) (EPIP)                       | Psat1 (Psa) (Psat) | 162 | 541 | 16 | 24 |

|        |                                                                                                                                                                                                                                |                                |      |      |    |    |
|--------|--------------------------------------------------------------------------------------------------------------------------------------------------------------------------------------------------------------------------------|--------------------------------|------|------|----|----|
| Q9Z1F9 | SUMO-activating enzyme subunit 2 (EC 6.3.2.-) (Ubiquitin-like 1-activating enzyme E1B) (Anthracycline-associated resistance ARX)                                                                                               | Uba2 (Sae2) (Uble1b)           | 62   | 77   | 10 | 14 |
| P05214 | Tubulin alpha-3 chain (Tubulin alpha-3/alpha-7 chain) (Alpha-tubulin 3/7) (Alpha-tubulin isotype M-alpha-3/7)                                                                                                                  | Tuba3a (Tuba3); Tuba3b (Tuba7) | 1112 | 1288 | 61 | 84 |
| Q61937 | Nucleophosmin (NPM) (Nucleolar phosphoprotein B23) (Numatrin) (Nucleolar protein NO38)                                                                                                                                         | Npm1                           | 92   | 66   | 11 | 15 |
| Q5SXJ3 | Fanconi anemia group J protein homolog (Protein FACJ) (EC 3.6.1.-) (ATP-dependent RNA helicase BRIP1) (BRCA1-interacting protein C-terminal helicase 1) (BRCA1-interacting protein 1) (BRCA1-associated C-terminal helicase 1) | Brip1 (Bach1) (Fancj)          | 25   | 18   | 13 | 17 |
| P05064 | Fructose-bisphosphate aldolase A (EC 4.1.2.13) (Muscle-type aldolase) (Aldolase 1)                                                                                                                                             | Aldoa (Aldo1)                  | 211  | 567  | 36 | 46 |
| Q80X50 | Ubiquitin-associated protein 2-like                                                                                                                                                                                            | Ubp2l                          | 63   | 54   | 4  | 5  |
| Q60716 | Prolyl 4-hydroxylase subunit alpha-2 (EC 1.14.11.2) (4-PH alpha-2) (Procollagen-proline,2-oxoglutarate-4-dioxygenase subunit alpha-2)                                                                                          | P4ha2                          | 22   | 27   | 8  | 10 |
| Q8BGD9 | Eukaryotic translation initiation factor 4B (eIF-4B)                                                                                                                                                                           | Eif4b                          | 238  | 306  | 13 | 16 |
| P54227 | Stathmin (Phosphoprotein p19) (pp19) (Leukemia-associated phosphoprotein p18) (Oncoprotein 18) (Op18) (pp17) (Prosolin) (Metablastin) (Protein Pr22) (Leukemia-associated gene protein)                                        | Stmn1 (Lag) (Lap18) (Pr22)     | 121  | 120  | 10 | 12 |
| O08908 | Phosphatidylinositol 3-kinase regulatory subunit beta (PI3-kinase p85 subunit beta) (PtdIns-3-kinase p85-beta)                                                                                                                 | Pik3r2                         | 19   | 25   | 20 | 24 |
| Q60575 | Kinesin-like protein KIF1B                                                                                                                                                                                                     | Kif1b                          | 45   | 95   | 30 | 36 |

|        |                                                                                                                                                    |                                       |     |     |    |    |
|--------|----------------------------------------------------------------------------------------------------------------------------------------------------|---------------------------------------|-----|-----|----|----|
| Q9ET77 | Junctophilin-3 (Junctophilin type 3) (JP-3)                                                                                                        | Jph3 (Jp3)                            | 37  | 31  | 20 | 22 |
| Q6P4S8 | Integrator complex subunit 1 (Int1)                                                                                                                | Ints1                                 | 25  | 33  | 26 | 27 |
| P26039 | Talin-1                                                                                                                                            | Tln1 (Tln)                            | 123 | 161 | 41 | 42 |
| Q62261 | Spectrin beta chain, brain 1 (Spectrin, non-erythroid beta chain 1) (Beta-II spectrin) (Fodrin beta chain) (Embryonic liver fodrin)                | Sptbn1 (Elf) (Spnb-2) (Spnb2) (Sptb2) | 56  | 54  | 48 | 48 |
| P07724 | Serum albumin                                                                                                                                      | Alb (Alb-1) (Alb1)                    | 550 | 572 | 22 | 21 |
| Q99PF4 | Cadherin-23 (Otocadherin)                                                                                                                          | Cdh23                                 | 29  | 32  | 29 | 27 |
| Q9D6Z1 | Nucleolar protein 5A (Nucleolar protein Nop56)                                                                                                     | Nol5a (Nop56)                         | 38  | 39  | 14 | 13 |
| Q6TXD4 | Dynamin-binding protein (Scaffold protein Tuba)                                                                                                    | Dnmbp (Kiaa1010)                      | 32  | 21  | 13 | 12 |
| P35969 | Vascular endothelial growth factor receptor 1 (VEGFR-1) (EC 2.7.10.1) (Tyrosine-protein kinase receptor FLT) (FLT-1) (Embryonic receptor kinase 2) | Flt1 (Emrk2) (Flt)                    | 29  | 36  | 35 | 32 |
| Q99PG2 | Opioid growth factor receptor (OGFr) (Zeta-type opioid receptor)                                                                                   | Ogfr                                  | 38  | 24  | 8  | 7  |
| P21550 | Beta-enolase (EC 4.2.1.11) (2-phospho-D-glycerate hydro-lyase) (Muscle-specific enolase) (MSE) (Skeletal muscle enolase) (Enolase 3)               | Eno3 (Eno-3)                          | 313 | 146 | 30 | 26 |
| P35979 | 60S ribosomal protein L12                                                                                                                          | Rpl12                                 | 208 | 389 | 14 | 12 |
| Q91VW5 | Golgin subfamily A member 4 (tGolgin-1)                                                                                                            | Golga4                                | 41  | 60  | 46 | 39 |
| Q6DFV7 | Nuclear receptor coactivator 7                                                                                                                     | Ncoa7                                 | 25  | 16  | 11 | 9  |
| P00342 | L-lactate dehydrogenase C chain (LDH-C) (EC 1.1.1.27) (LDH testis subunit) (LDH-X)                                                                 | Ldhc (Ldh-3) (Ldh3)                   | 97  | 122 | 15 | 12 |
| Q99MD9 | Nuclear autoantigenic sperm protein (NASP)                                                                                                         | Nasp                                  | 365 | 293 | 34 | 27 |
| Q8BP67 | 60S ribosomal protein L24                                                                                                                          | Rpl24                                 | 354 | 214 | 24 | 19 |
| Q99MY8 | Probable histone-lysine N-methyltransferase ASH1L (EC 2.1.1.43) (Absent small and homeotic disks protein 1 homolog) (ASH1-like protein)            | Ash1l                                 | 19  | 31  | 46 | 35 |



|        |                                                                                                                                                                                                                       |                                  |      |     |     |    |
|--------|-----------------------------------------------------------------------------------------------------------------------------------------------------------------------------------------------------------------------|----------------------------------|------|-----|-----|----|
| P97434 | Myosin phosphatase Rho-interacting protein (Rho-interacting protein 3) (RIP3) (p116Rip)                                                                                                                               | Mprip (Kiaa0864) (Mrip) (Rhoip3) | 35   | 23  | 25  | 19 |
| Q02956 | Protein kinase C zeta type (EC 2.7.11.13) (nPKC-zeta)                                                                                                                                                                 | Prkcz (PkcZ)                     | 29   | 15  | 8   | 6  |
| Q9D8V0 | Minor histocompatibility antigen H13 (EC 3.4.23.-) (Signal peptide peptidase) (Presenilin-like protein 3)                                                                                                             | Hm13 (H13) (Psl3)                | 23   | 29  | 28  | 21 |
| P25444 | 40S ribosomal protein S2 (S4) (LLRep3 protein)                                                                                                                                                                        | Rps2 (Llrep3) (Rps4)             | 217  | 50  | 26  | 19 |
| Q60673 | Receptor-type tyrosine-protein phosphatase-like N (R-PTP-N) (PTP IA-2)                                                                                                                                                | Ptprn (Ptp35)                    | 30   | 18  | 14  | 10 |
| P29391 | Ferritin light chain 1 (Ferritin L subunit 1)                                                                                                                                                                         | Ftl1 (Ftl) (Ftl-1)               | 150  | 159 | 6   | 4  |
| Q61879 | Myosin-10 (Myosin heavy chain 10) (Myosin heavy chain, non-muscle IIb) (Non-muscle myosin heavy chain IIb) (NMMHC II-b) (NMMHC-IIB) (Cellular myosin heavy chain, type B) (Non-muscle myosin heavy chain-B) (NMMHC-B) | Myh10                            | 122  | 101 | 65  | 40 |
| Q6NZJ6 | Eukaryotic translation initiation factor 4 gamma 1 (eIF-4-gamma 1) (eIF-4G 1) (eIF-4G1)                                                                                                                               | Eif4g1                           | 47   | 113 | 30  | 18 |
| P80317 | T-complex protein 1 subunit zeta (TCP-1-zeta) (CCT-zeta) (CCT-zeta-1)                                                                                                                                                 | Cct6a (Cct6) (Cctz) (Cctz1)      | 160  | 52  | 22  | 13 |
| P63017 | Heat shock cognate 71 kDa protein (Heat shock 70 kDa protein 8)                                                                                                                                                       | Hspa8 (Hsc70) (Hsc73)            | 1719 | 959 | 119 | 70 |
| Q9D9P2 | Coiled-coil domain-containing protein 103                                                                                                                                                                             | Ccdc103                          | 136  | 63  | 12  | 7  |
| P26043 | Radixin (ESP10)                                                                                                                                                                                                       | Rdx                              | 127  | 106 | 23  | 13 |
| Q9WTU3 | Sodium channel protein type 8 subunit alpha (Sodium channel protein type VIII subunit alpha) (Voltage-gated sodium channel subunit alpha Nav1.6)                                                                      | Scn8a (Nbna1)                    | 28   | 19  | 20  | 11 |

|               |        |                                                                                                                                                                                                                                |                                                                                                                                                                               |      |      |    |    |
|---------------|--------|--------------------------------------------------------------------------------------------------------------------------------------------------------------------------------------------------------------------------------|-------------------------------------------------------------------------------------------------------------------------------------------------------------------------------|------|------|----|----|
| Fertilization | P62806 | Histone H4                                                                                                                                                                                                                     | Hist1h4a;<br>Hist1h4b (H4-53); Hist1h4c (H4-12);<br>Hist1h4d;<br>Hist1h4f;<br>Hist1h4h;<br>Hist1h4i;<br>Hist1h4j;<br>Hist1h4k;<br>Hist1h4m;<br>Hist2h4a (Hist2h4);<br>Hist4h4 | 815  | 1617 | 47 | 78 |
|               | Q62522 | Zona pellucida-binding protein 1 (Sp38)                                                                                                                                                                                        | Zpbp (Zpbp1)                                                                                                                                                                  | 38   | 42   | 8  | 12 |
|               | Q5SXJ3 | Fanconi anemia group J protein homolog (Protein FACJ) (EC 3.6.1.-) (ATP-dependent RNA helicase BRIP1) (BRCA1-interacting protein C-terminal helicase 1) (BRCA1-interacting protein 1) (BRCA1-associated C-terminal helicase 1) | Brip1 (Bach1) (Fancj)                                                                                                                                                         | 25   | 18   | 13 | 17 |
|               | P63321 | Ras-related protein Ral-A                                                                                                                                                                                                      | Rala (Ral) (Rala)                                                                                                                                                             | 25   | 22   | 30 | 39 |
|               | O08810 | 116 kDa U5 small nuclear ribonucleoprotein component (U5 snRNP-specific protein, 116 kDa) (U5-116 kDa) (Elongation factor Tu GTP-binding domain-containing protein 2)                                                          | Eftud2 (Snrp116)                                                                                                                                                              | 80   | 68   | 21 | 25 |
|               | P41230 | Histone demethylase JARID1C (EC 1.14.11.-) (Jumonji/ARID domain-containing protein 1C) (Protein SmcX) (Protein Xe169)                                                                                                          | Jarid1c (Kiaa0234) (Smcx) (Xe169)                                                                                                                                             | 34   | 32   | 26 | 29 |
|               | P16858 | Glyceraldehyde-3-phosphate dehydrogenase (GAPDH) (EC 1.2.1.12)                                                                                                                                                                 | Gapdh (Gapd)                                                                                                                                                                  | 1514 | 1781 | 84 | 89 |
|               | P26350 | Prothymosin alpha [Cleaved into: Thymosin alpha]                                                                                                                                                                               | Ptma                                                                                                                                                                          | 34   | 120  | 2  | 2  |

|            |        |                                                                                                                                                                   |                              |      |      |     |     |
|------------|--------|-------------------------------------------------------------------------------------------------------------------------------------------------------------------|------------------------------|------|------|-----|-----|
|            | Q8VCZ3 | THAP domain-containing protein 7                                                                                                                                  | Thap7                        | 26   | 18   | 6   | 6   |
|            | Q99PF4 | Cadherin-23 (Otocadherin)                                                                                                                                         | Cdh23                        | 29   | 32   | 29  | 27  |
|            | Q8VHE6 | Dynein heavy chain 5, axonemal (Axonemal beta dynein heavy chain 5) (Mdnah5) (Ciliary dynein heavy chain 5)                                                       | Dnah5 (Dnahc5)               | 47   | 44   | 83  | 72  |
|            | Q8CGK3 | Lon protease homolog, mitochondrial (EC 3.4.21.-) (Lon protease-like protein) (LONP) (Mitochondrial ATP-dependent protease Lon) (Serine protease 15)              | Lonp1 (Prss15)               | 21   | 30   | 43  | 33  |
|            | O88799 | Zonadhesin                                                                                                                                                        | Zan                          | 22   | 26   | 25  | 17  |
|            | P68033 | Actin, alpha cardiac muscle 1 (Alpha-cardiac actin)                                                                                                               | Actc1 (Actc)                 | 3948 | 2726 | 234 | 155 |
|            | Q8CG48 | Structural maintenance of chromosomes protein 2 (Chromosome-associated protein E) (XCAP-E homolog) (FGF-inducible protein 16)                                     | Smc2 (Cape) (Fin16) (Smc2l1) | 32   | 36   | 41  | 26  |
|            | Q9QUK4 | Baculoviral IAP repeat-containing protein 1b (Neuronal apoptosis inhibitory protein 2)                                                                            | Naip2 (Birc1b) (Naip-rs6)    | 21   | 28   | 14  | 8   |
|            | Q8K2A7 | Integrator complex subunit 10 (Int10)                                                                                                                             | Ints10                       | 32   | 47   | 21  | 12  |
| Glycolysis | P52480 | Pyruvate kinase isozymes M1/M2 (EC 2.7.1.40) (Pyruvate kinase muscle isozyme)                                                                                     | Pkm2 (Pk3) (Pykm)            | 1954 | 3481 | 138 | 233 |
|            | P63158 | High mobility group protein B1 (High mobility group protein 1) (HMG-1)                                                                                            | Hmgb1 (Hmg-1) (Hmg1)         | 153  | 405  | 25  | 38  |
|            | P16045 | Galectin-1 (Lectin galactoside-binding soluble 1) (Beta-galactoside-binding lectin L-14-I) (Lactose-binding lectin 1) (S-Lac lectin 1) (Galaptin) (14 kDa lectin) | Lgals1 (Gbp)                 | 79   | 85   | 6   | 9   |
|            | P53657 | Pyruvate kinase isozymes R/L (EC 2.7.1.40) (L PK)                                                                                                                 | Pklr                         | 144  | 270  | 26  | 38  |
|            | Q921C5 | Protein bicaudal D homolog 2 (Bic-D 2)                                                                                                                            | Bicd2 (Kiaa0699)             | 31   | 23   | 26  | 34  |
|            | P05064 | Fructose-bisphosphate aldolase A (EC 4.1.2.13) (Muscle-type aldolase) (Aldolase 1)                                                                                | Aldoa (Aldo1)                | 211  | 567  | 36  | 46  |

|        |                                                                                                                                                                                                                                       |                                    |      |      |     |     |
|--------|---------------------------------------------------------------------------------------------------------------------------------------------------------------------------------------------------------------------------------------|------------------------------------|------|------|-----|-----|
| O09010 | Beta-1,3-N-acetylglucosaminyltransferase lunatic fringe (EC 2.4.1.222) (O-fucosylpeptide 3-beta-N-acetylglucosaminyltransferase)                                                                                                      | Lfng                               | 33   | 33   | 8   | 10  |
| P17183 | Gamma-enolase (EC 4.2.1.11) (2-phospho-D-glycerate hydro-lyase) (Neural enolase) (Neuron-specific enolase) (NSE) (Enolase 2)                                                                                                          | Eno2 (Eno-2)                       | 228  | 181  | 12  | 15  |
| Q9JKF1 | Ras GTPase-activating-like protein IQGAP1                                                                                                                                                                                             | Iqgap1                             | 19   | 81   | 21  | 25  |
| Q64467 | Glyceraldehyde-3-phosphate dehydrogenase, testis-specific (EC 1.2.1.12) (Spermatogenic glyceraldehyde-3-phosphate dehydrogenase) (Spermatogenic cell-specific glyceraldehyde 3-phosphate dehydrogenase 2) (GAPDH-2)                   | Gapdhs (Gapds) (Gapds)             | 75   | 781  | 26  | 29  |
| P26618 | Alpha-type platelet-derived growth factor receptor (EC 2.7.10.1) (PDGF-R-alpha) (CD140 antigen-like family member A) (CD antigen CD140a)                                                                                              | Pdgfra                             | 37   | 73   | 160 | 178 |
| Q9R0Q7 | Prostaglandin E synthase 3 (EC 5.3.99.3) (Cytosolic prostaglandin E2 synthase) (cPGES) (Telomerase-binding protein p23) (Hsp90 co-chaperone) (Progesterone receptor complex p23) (Sid 3177)                                           | Ptges3 (Sid3177) (Tebp)            | 124  | 239  | 10  | 11  |
| Q9Z104 | SWI/SNF-related matrix-associated actin-dependent regulator of chromatin subfamily E member 1-related (SMARCE1-related protein) (HMG box-containing protein 20B) (Structural DNA-binding protein BRAF35) (BRCA2-associated factor 35) | Hmg20b (Braf35) (Hmgx2) (Smarce1r) | 30   | 20   | 14  | 15  |
| P16858 | Glyceraldehyde-3-phosphate dehydrogenase (GAPDH) (EC 1.2.1.12)                                                                                                                                                                        | Gapdh (Gapd)                       | 1514 | 1781 | 84  | 89  |
| Q99LX0 | Protein DJ-1 (Parkinson disease protein 7 homolog)                                                                                                                                                                                    | Park7                              | 53   | 178  | 9   | 9   |
| Q80UK8 | Integrator complex subunit 2 (Int2)                                                                                                                                                                                                   | Ints2 (Kiaa1287)                   | 16   | 27   | 24  | 24  |

|           |        |                                                                                                                                                                                        |                       |      |     |    |    |
|-----------|--------|----------------------------------------------------------------------------------------------------------------------------------------------------------------------------------------|-----------------------|------|-----|----|----|
|           | Q9DBJ1 | Phosphoglycerate mutase 1 (EC 5.4.2.1) (EC 5.4.2.4) (EC 3.1.3.13) (Phosphoglycerate mutase isozyme B) (PGAM-B) (BPG-dependent PGAM 1)                                                  | Pgam1                 | 612  | 746 | 35 | 31 |
|           | P21550 | Beta-enolase (EC 4.2.1.11) (2-phospho-D-glycerate hydro-lyase) (Muscle-specific enolase) (MSE) (Skeletal muscle enolase) (Enolase 3)                                                   | Eno3 (Eno-3)          | 313  | 146 | 30 | 26 |
|           | Q64512 | Tyrosine-protein phosphatase non-receptor type 13 (EC 3.1.3.48) (Protein tyrosine phosphatase PTP-BL) (Protein-tyrosine phosphatase RIP) (Protein tyrosine phosphatase DPZPTP) (PTP36) | Ptpn13 (Ptp14)        | 28   | 27  | 26 | 21 |
|           | P17182 | Alpha-enolase (EC 4.2.1.11) (2-phospho-D-glycerate hydro-lyase) (Non-neural enolase) (NNE) (Enolase 1)                                                                                 | Eno1 (Eno-1)          | 976  | 802 | 62 | 50 |
|           | P00342 | L-lactate dehydrogenase C chain (LDH-C) (EC 1.1.1.27) (LDH testis subunit) (LDH-X)                                                                                                     | Ldhc (Ldh-3) (Ldh3)   | 97   | 122 | 15 | 12 |
|           | P06151 | L-lactate dehydrogenase A chain (LDH-A) (EC 1.1.1.27) (LDH muscle subunit) (LDH-M)                                                                                                     | Ldha (Ldh-1) (Ldh1)   | 1033 | 421 | 74 | 57 |
|           | P05063 | Fructose-bisphosphate aldolase C (EC 4.1.2.13) (Brain-type aldolase) (Aldolase 3) (Zebrin II) (Scrapie-responsive protein 2)                                                           | Aldoc (Aldo3) (Scrg2) | 35   | 51  | 13 | 10 |
|           | P17751 | Triosephosphate isomerase (TIM) (EC 5.3.1.1) (Triose-phosphate isomerase)                                                                                                              | Tpi1 (Tpi)            | 706  | 519 | 35 | 25 |
|           | P16125 | L-lactate dehydrogenase B chain (LDH-B) (EC 1.1.1.27) (LDH heart subunit) (LDH-H)                                                                                                      | Ldhb (Ldh-2) (Ldh2)   | 315  | 214 | 34 | 21 |
|           | P09041 | Phosphoglycerate kinase 2 (EC 2.7.2.3) (Phosphoglycerate kinase, testis specific)                                                                                                      | Pgk2 (Pgk-2)          | 162  | 73  | 17 | 10 |
| Oogenesis | Q9Z129 | ATP-dependent DNA helicase Q1 (EC 3.6.1.-) (DNA-dependent ATPase Q1)                                                                                                                   | Recql (Recql1)        | 17   | 27  | 13 | 22 |

|        |                                                                                                                                                                                                                     |                            |     |     |     |     |
|--------|---------------------------------------------------------------------------------------------------------------------------------------------------------------------------------------------------------------------|----------------------------|-----|-----|-----|-----|
| P54227 | Stathmin (Phosphoprotein p19) (pp19) (Leukemia-associated phosphoprotein p18) (Oncoprotein 18) (Op18) (pp17) (Prosolin) (Metablastin) (Protein Pr22) (Leukemia-associated gene protein)                             | Stmn1 (Lag) (Lap18) (Pr22) | 121 | 120 | 10  | 12  |
| Q9R0K7 | Plasma membrane calcium-transporting ATPase 2 (PMCA2) (EC 3.6.3.8) (Plasma membrane calcium ATPase isoform 2) (Plasma membrane calcium pump isoform 2)                                                              | Atp2b2 (Pmca2)             | 32  | 27  | 70  | 83  |
| Q5SPW0 | Vacuolar protein sorting-associated protein 54 (Tumor antigen SLP-8p homolog)                                                                                                                                       | Vps54                      | 36  | 28  | 13  | 15  |
| Q61599 | Rho GDP-dissociation inhibitor 2 (Rho GDI 2) (Rho-GDI beta) (D4)                                                                                                                                                    | Arhgdib (Gdid4)            | 18  | 25  | 9   | 10  |
| Q8VI56 | Low-density lipoprotein receptor-related protein 4 (LDLR dan)                                                                                                                                                       | Lrp4 (Kiaa0816)            | 77  | 30  | 19  | 20  |
| P62141 | Serine/threonine-protein phosphatase PP1-beta catalytic subunit (PP-1B) (EC 3.1.3.16)                                                                                                                               | Ppp1cb                     | 177 | 57  | 4   | 4   |
| Q7TMY8 | E3 ubiquitin-protein ligase HUWE1 (EC 6.3.2.-) (HECT, UBA and WWE domain-containing protein 1) (Upstream regulatory element-binding protein 1) (URE-binding protein 1) (URE-B1) (E3Histone)                         | Huwe1 (Kiaa0312) (Ureb1)   | 33  | 91  | 39  | 36  |
| Q8VDD5 | Myosin-9 (Myosin heavy chain 9) (Myosin heavy chain, non-muscle IIa) (Non-muscle myosin heavy chain IIa) (NMMHC II-a) (NMMHC-IIA) (Cellular myosin heavy chain, type A) (Non-muscle myosin heavy chain-A) (NMMHC-A) | Myh9                       | 780 | 839 | 127 | 115 |
| Q63994 | Myeloid cell surface antigen CD33 (Sialic acid-binding Ig-like lectin 3) (Siglec-3) (CD antigen CD33)                                                                                                               | Cd33 (Siglec3)             | 34  | 34  | 7   | 6   |
| Q99PT1 | Rho GDP-dissociation inhibitor 1 (Rho GDI 1) (Rho-GDI alpha) (GDI-1)                                                                                                                                                | Arhgdia (C87222) (Gdi1)    | 923 | 675 | 37  | 31  |

|                                    |        |                                                                                                                                      |                                                   |     |      |     |    |
|------------------------------------|--------|--------------------------------------------------------------------------------------------------------------------------------------|---------------------------------------------------|-----|------|-----|----|
|                                    | P09405 | Nucleolin (Protein C23)                                                                                                              | Ncl (Nuc)                                         | 775 | 872  | 78  | 65 |
|                                    | P54923 | [Protein ADP-ribosylarginine] hydrolase (ADP-ribosylarginine hydrolase) (EC 3.2.2.19) (ADP-ribose-L-arginine cleaving enzyme)        | Adprh (Arh1)                                      | 20  | 41   | 15  | 12 |
|                                    | Q9Z2U0 | Proteasome subunit alpha type-7 (EC 3.4.25.1) (Proteasome subunit RC6-1)                                                             | Psma7                                             | 121 | 253  | 15  | 12 |
|                                    | P62991 | Ubiquitin                                                                                                                            | Rps27a (Uba80) (Ubcep1); Uba52 (Ubcep2); Ubb; Ubc | 61  | 54   | 11  | 8  |
|                                    | P40142 | Transketolase (TK) (EC 2.2.1.1) (P68)                                                                                                | Tkt                                               | 562 | 250  | 117 | 75 |
|                                    | Q68ED2 | Metabotropic glutamate receptor 7 (mGluR7)                                                                                           | Grm7 (Gprc1g) (Mglur7)                            | 37  | 33   | 13  | 8  |
|                                    | P62301 | 40S ribosomal protein S13                                                                                                            | Rps13                                             | 77  | 100  | 23  | 14 |
| Chromatin packaging and remodeling | Q8BTM8 | Filamin-A (Alpha-filamin) (Filamin-1) (Endothelial actin-binding protein) (Actin-binding protein 280) (ABP-280) (Non-muscle filamin) | Flna (Fln) (Fln1)                                 | 254 | 1031 | 46  | 86 |
|                                    | Q8CGP2 | Histone H2B type 1-P                                                                                                                 | Hist1h2bp                                         | 436 | 999  | 46  | 77 |

|        |                                                                                                                                                 |                                                                                                                                                                               |     |      |    |    |
|--------|-------------------------------------------------------------------------------------------------------------------------------------------------|-------------------------------------------------------------------------------------------------------------------------------------------------------------------------------|-----|------|----|----|
| P62806 | Histone H4                                                                                                                                      | Hist1h4a;<br>Hist1h4b (H4-53); Hist1h4c (H4-12);<br>Hist1h4d;<br>Hist1h4f;<br>Hist1h4h;<br>Hist1h4i;<br>Hist1h4j;<br>Hist1h4k;<br>Hist1h4m;<br>Hist2h4a (Hist2h4);<br>Hist4h4 | 815 | 1617 | 47 | 78 |
| Q64475 | Histone H2B type 1-B (h2B-143)                                                                                                                  | Hist1h2bb                                                                                                                                                                     | 436 | 999  | 46 | 75 |
| P14824 | Annexin A6 (Annexin-6) (Annexin VI) (Lipocortin VI) (p68) (p70) (Protein III) (Chromobindin-20) (67 kDa calelectrin) (Calphobindin-II) (CPB-II) | Anxa6 (Anx6)                                                                                                                                                                  | 168 | 591  | 33 | 51 |
| Q60695 | Ral guanine nucleotide dissociation stimulator-like 1 (RalGDS-like 1)                                                                           | Rgl1 (Rgl)                                                                                                                                                                    | 26  | 15   | 4  | 6  |
| P61982 | 14-3-3 protein gamma                                                                                                                            | Ywhag                                                                                                                                                                         | 653 | 841  | 53 | 79 |
| Q3THW5 | Histone H2A.V (H2A.F/Z)                                                                                                                         | H2afv (H2av)                                                                                                                                                                  | 297 | 426  | 11 | 16 |
| P70696 | Histone H2B type 1-A (Histone H2B, testis) (Testis-specific histone H2B)                                                                        | Hist1h2ba (Th2b)                                                                                                                                                              | 146 | 378  | 37 | 51 |
| Q9Z277 | Bromodomain adjacent to zinc finger domain protein 1B (Williams-Beuren syndrome chromosomal region 9 protein homolog) (WBRS9)                   | Baz1b (Wbscr9)                                                                                                                                                                | 43  | 17   | 26 | 34 |
| Q07133 | Histone H1t (Testicular H1 histone)                                                                                                             | Hist1h1t (H1ft) (H1t)                                                                                                                                                         | 46  | 72   | 54 | 69 |
| P27661 | Histone H2A.x (H2a/x)                                                                                                                           | H2afx (H2a.x) (H2ax) (Hist5-2ax)                                                                                                                                              | 301 | 426  | 15 | 19 |



|        |                                                                                                                                                                                                                             |                           |     |     |     |     |
|--------|-----------------------------------------------------------------------------------------------------------------------------------------------------------------------------------------------------------------------------|---------------------------|-----|-----|-----|-----|
| Q61466 | SWI/SNF-related matrix-associated actin-dependent regulator of chromatin subfamily D member 1 (SWI/SNF complex 60 kDa subunit) (60 kDa BRG-1/Brm-associated factor subunit A) (BRG1-associated factor 60A) (D15KZ1 protein) | Smarcd1 (Baf60a) (D15Kz1) | 27  | 29  | 13  | 16  |
| Q6GSS7 | Histone H2A type 2-A (H2A.2) (H2a-614) (H2a-615)                                                                                                                                                                            | Hist2h2aa1; Hist2h2aa2    | 505 | 763 | 18  | 21  |
| P55200 | Histone-lysine N-methyltransferase HRX (EC 2.1.1.43) (Zinc finger protein HRX) (ALL-1)                                                                                                                                      | Mll (All1) (Hrx) (Mll1)   | 67  | 26  | 39  | 44  |
| P40124 | Adenylyl cyclase-associated protein 1 (CAP 1)                                                                                                                                                                               | Cap1 (Cap)                | 22  | 43  | 8   | 9   |
| Q6P9Z1 | SWI/SNF-related matrix-associated actin-dependent regulator of chromatin subfamily D member 3 (60 kDa BRG-1/Brm-associated factor subunit C) (BRG1-associated factor 60C) (mBAF60c)                                         | Smarcd3 (Baf60c)          | 29  | 19  | 46  | 50  |
| P11984 | T-complex protein 1 subunit alpha A (TCP-1-alpha) (CCT-alpha) (Tailless complex polypeptide 1A) (TCP-1-A)                                                                                                                   | Cct1 (Ccta) (Tcp1)        | 29  | 66  | 14  | 15  |
| Q9R190 | Metastasis-associated protein MTA2 (Metastasis-associated 1-like 1)                                                                                                                                                         | Mta2 (Mta111)             | 27  | 26  | 9   | 9   |
| P30275 | Creatine kinase, ubiquitous mitochondrial (EC 2.7.3.2) (U-MtCK) (Acidic-type mitochondrial creatine kinase) (Mia-CK)                                                                                                        | Ckmt1                     | 205 | 121 | 32  | 30  |
| Q01853 | Transitional endoplasmic reticulum ATPase (TER ATPase) (15S Mg(2+)-ATPase p97 subunit) (Valosin-containing protein) (VCP)                                                                                                   | Vcp                       | 691 | 699 | 56  | 51  |
| Q8VDD5 | Myosin-9 (Myosin heavy chain 9) (Myosin heavy chain, non-muscle IIa) (Non-muscle myosin heavy chain IIa) (NMMHC II-a) (NMMHC-IIA) (Cellular myosin heavy chain, type A) (Non-muscle myosin heavy chain-A) (NMMHC-A)         | Myh9                      | 780 | 839 | 127 | 115 |

|           |        |                                                                                                                                                                                                             |                       |     |     |    |    |
|-----------|--------|-------------------------------------------------------------------------------------------------------------------------------------------------------------------------------------------------------------|-----------------------|-----|-----|----|----|
|           | P43277 | Histone H1.3 (H1 VAR.4) (H1d)                                                                                                                                                                               | Hist1h1d (H1f3)       | 78  | 99  | 18 | 16 |
|           | Q68FD5 | Clathrin heavy chain 1                                                                                                                                                                                      | Cltc                  | 944 | 884 | 88 | 78 |
|           | Q9JM52 | Misshapen-like kinase 1 (EC 2.7.11.1) (Mitogen-activated protein kinase kinase kinase 6) (MAPK/ERK kinase kinase 6) (MEK kinase kinase 6) (MEKKK 6) (Misshapen/NIK-related kinase) (GCK family kinase MiNK) | Mink1 (Map4k6) (Mink) | 18  | 54  | 13 | 11 |
|           | P11983 | T-complex protein 1 subunit alpha B (TCP-1-alpha) (CCT-alpha) (Tailless complex polypeptide 1B) (TCP-1-B)                                                                                                   | Cct1 (Ccta) (Tcp1)    | 29  | 66  | 18 | 15 |
|           | P14206 | 40S ribosomal protein SA (Laminin receptor 1) (p40) (34/67 kDa laminin receptor) (37 kDa oncofetal antigen) (OFA/iLRP)                                                                                      | Rpsa (Lamr1) (P40-8)  | 131 | 112 | 11 | 9  |
|           | Q9Z1M8 | Protein Red (Protein RER) (IK factor) (Cytokine IK)                                                                                                                                                         | Ik (Red) (Rer)        | 29  | 23  | 10 | 8  |
|           | Q99MY8 | Probable histone-lysine N-methyltransferase ASH1L (EC 2.1.1.43) (Absent small and homeotic disks protein 1 homolog) (ASH1-like protein)                                                                     | Ash1l                 | 19  | 31  | 46 | 35 |
|           | Q9QYB1 | Chloride intracellular channel protein 4 (mc3s5/mtCLIC)                                                                                                                                                     | Clic4                 | 28  | 33  | 4  | 3  |
|           | Q60673 | Receptor-type tyrosine-protein phosphatase-like N (R-PTP-N) (PTP IA-2)                                                                                                                                      | Ptprn (Ptp35)         | 30  | 18  | 14 | 10 |
|           | P43275 | Histone H1.1 (H1 VAR.3) (H1a)                                                                                                                                                                               | Hist1h1a (H1f1)       | 28  | 90  | 9  | 6  |
|           | P42932 | T-complex protein 1 subunit theta (TCP-1-theta) (CCT-theta)                                                                                                                                                 | Cct8 (Cctq)           | 197 | 57  | 23 | 15 |
|           | Q9Z1Q5 | Chloride intracellular channel protein 1 (Nuclear chloride ion channel 27) (NCC27)                                                                                                                          | Clic1                 | 137 | 139 | 9  | 5  |
| Apoptosis | P56198 | Cell death activator CIDE-3 (Cell death-inducing DFFA-like effector protein C) (Fat-specific protein FSP27)                                                                                                 | Cidec (Fsp27)         | 51  | 39  | 8  | 14 |
|           | Q9Z1R2 | Large proline-rich protein BAT3 (HLA-B-associated transcript 3)                                                                                                                                             | Bat3                  | 80  | 49  | 15 | 26 |

|        |                                                                                                                                                                                                              |                                        |      |      |    |    |
|--------|--------------------------------------------------------------------------------------------------------------------------------------------------------------------------------------------------------------|----------------------------------------|------|------|----|----|
| Q61937 | Nucleophosmin (NPM) (Nucleolar phosphoprotein B23) (Numatrin) (Nucleolar protein NO38)                                                                                                                       | Npm1                                   | 92   | 66   | 11 | 15 |
| Q9ERU9 | E3 SUMO-protein ligase RanBP2 (Ran-binding protein 2)                                                                                                                                                        | Ranbp2                                 | 56   | 49   | 40 | 53 |
| P63163 | Small nuclear ribonucleoprotein-associated protein N (snRNP-N) (Sm protein N) (Sm-N) (SmN) (Sm-D) (Tissue-specific-splicing protein)                                                                         | Snrpn (Smn)                            | 38   | 17   | 7  | 9  |
| Q80X50 | Ubiquitin-associated protein 2-like                                                                                                                                                                          | Ubp2l                                  | 63   | 54   | 4  | 5  |
| O35618 | Protein Mdm4 (p53-binding protein Mdm4) (Mdm2-like p53-binding protein) (Protein Mdmx) (Double minute 4 protein)                                                                                             | Mdm4 (Mdmx)                            | 17   | 29   | 5  | 6  |
| Q9WUU9 | 80 kDa MCM3-associated protein (Protein GANP)                                                                                                                                                                | Mcm3ap (Ganp) (Map80)                  | 48   | 32   | 17 | 19 |
| Q9WUF3 | CASP8-associated protein 2 (FLICE-associated huge protein)                                                                                                                                                   | Casp8ap2 (Flash)                       | 28   | 16   | 26 | 29 |
| P27546 | Microtubule-associated protein 4 (MAP-4)                                                                                                                                                                     | Map4 (Mtap4)                           | 94   | 41   | 33 | 36 |
| P70298 | Homeobox protein cut-like 2 (Cut-like 2) (Homeobox protein Cux-2)                                                                                                                                            | Cux2 (Cutl2)                           | 30   | 22   | 12 | 13 |
| P16858 | Glyceraldehyde-3-phosphate dehydrogenase (GAPDH) (EC 1.2.1.12)                                                                                                                                               | Gapdh (Gapd)                           | 1514 | 1781 | 84 | 89 |
| P62281 | 40S ribosomal protein S11                                                                                                                                                                                    | Rps11                                  | 166  | 132  | 27 | 28 |
| O54951 | Semaphorin-6B (Semaphorin VIB) (Sema VIB) (Semaphorin-N) (Sema N)                                                                                                                                            | Sema6b (Seman)                         | 34   | 25   | 10 | 10 |
| Q9WV80 | Sorting nexin-1                                                                                                                                                                                              | Snx1                                   | 23   | 49   | 11 | 11 |
| Q91YE5 | Bromodomain adjacent to zinc finger domain protein 2A (Transcription termination factor I-interacting protein 5) (TTF-I-interacting protein 5) (Tip5)                                                        | Baz2a (Tip5)                           | 36   | 15   | 56 | 55 |
| Q8R4B8 | NACHT, LRR and PYD domains-containing protein 3 (Cold autoinflammatory syndrome 1 protein homolog) (Cryopyrin) (PYRIN-containing APAF1-like protein 1) (Mast cell maturation-associated-inducible protein 1) | Nlrp3 (Cias1) (Mmig1) (Nalp3) (Pypaf1) | 30   | 20   | 24 | 23 |

|        |                                                                                                                                                                                                             |                                                   |    |    |    |    |
|--------|-------------------------------------------------------------------------------------------------------------------------------------------------------------------------------------------------------------|---------------------------------------------------|----|----|----|----|
| Q8R1B4 | Eukaryotic translation initiation factor 3 subunit C (eIF3c) (Eukaryotic translation initiation factor 3 subunit 8) (eIF3 p110)                                                                             | Eif3c (Eif3s8)                                    | 34 | 63 | 22 | 21 |
| Q924C1 | Exportin-5 (Exp5) (Ran-binding protein 21)                                                                                                                                                                  | Xpo5 (Kiaa1291) (Ranbp21)                         | 20 | 62 | 15 | 13 |
| Q9JM52 | Misshapen-like kinase 1 (EC 2.7.11.1) (Mitogen-activated protein kinase kinase kinase 6) (MAPK/ERK kinase kinase 6) (MEK kinase kinase 6) (MEKKK 6) (Misshapen/NIK-related kinase) (GCK family kinase MiNK) | Mink1 (Map4k6) (Mink)                             | 18 | 54 | 13 | 11 |
| P20357 | Microtubule-associated protein 2 (MAP-2)                                                                                                                                                                    | Map2 (Mtap2)                                      | 50 | 22 | 30 | 25 |
| O55103 | Periaxin                                                                                                                                                                                                    | Prx                                               | 19 | 30 | 28 | 23 |
| Q8VI47 | Canalicular multispecific organic anion transporter 1 (ATP-binding cassette sub-family C member 2)                                                                                                          | Abcc2                                             | 31 | 38 | 39 | 31 |
| Q80W68 | Kin of IRRE-like protein 1 (Kin of irregular chiasm-like protein 1) (Nephrin-like protein 1)                                                                                                                | Kirrel (Kirrel1) (Neph1)                          | 32 | 38 | 22 | 17 |
| Q569Z6 | Thyroid hormone receptor-associated protein 3 (Thyroid hormone receptor-associated protein complex 150 kDa component) (Trap150)                                                                             | Thrap3 (Trap150)                                  | 29 | 48 | 21 | 16 |
| Q61656 | Probable ATP-dependent RNA helicase DDX5 (EC 3.6.1.-) (DEAD box protein 5) (RNA helicase p68) (DEAD box RNA helicase DEAD1) (mDEAD1)                                                                        | Ddx5 (Tnz2)                                       | 90 | 43 | 11 | 8  |
| P62991 | Ubiquitin                                                                                                                                                                                                   | Rps27a (Uba80) (Ubcep1); Uba52 (Ubcep2); Ubb; Ubc | 61 | 54 | 11 | 8  |

|        |                                                                                                                                                                 |                           |    |    |    |    |
|--------|-----------------------------------------------------------------------------------------------------------------------------------------------------------------|---------------------------|----|----|----|----|
| Q80U87 | Ubiquitin carboxyl-terminal hydrolase 8 (EC 3.1.2.15) (Ubiquitin thioesterase 8) (Ubiquitin-specific-processing protease 8) (Deubiquitinating enzyme 8) (mUBPy) | Usp8 (Kiaa0055) (Ubpy)    | 29 | 23 | 24 | 15 |
| Q68ED2 | Metabotropic glutamate receptor 7 (mGluR7)                                                                                                                      | Grm7 (Gprc1g) (Mglur7)    | 37 | 33 | 13 | 8  |
| Q9QWK5 | Baculoviral IAP repeat-containing protein 1a (Neuronal apoptosis inhibitory protein 1)                                                                          | Naip1 (Birc1a) (Naip)     | 21 | 28 | 20 | 12 |
| P05532 | Mast/stem cell growth factor receptor (SCFR) (EC 2.7.10.1) (Proto-oncogene tyrosine-protein kinase Kit) (c-kit) (CD antigen CD117)                              | Kit (Sl)                  | 16 | 35 | 12 | 7  |
| P97287 | Induced myeloid leukemia cell differentiation protein Mcl-1 homolog (Bcl-2-related protein EAT/mcl1)                                                            | Mcl1                      | 26 | 30 | 7  | 4  |
| Q9QUK4 | Baculoviral IAP repeat-containing protein 1b (Neuronal apoptosis inhibitory protein 2)                                                                          | Naip2 (Birc1b) (Naip-rs6) | 21 | 28 | 14 | 8  |
| P97461 | 40S ribosomal protein S5                                                                                                                                        | Rps5                      | 89 | 33 | 32 | 18 |

#### Enriched Molecular Function by Panther

| Term      | Accession | Protein names                                                                          | Genes                 | prot_score_WT | prot_score_KO | prot_matches_WT | prot_matches_KO |
|-----------|-----------|----------------------------------------------------------------------------------------|-----------------------|---------------|---------------|-----------------|-----------------|
| Chaperone | P61982    | 14-3-3 protein gamma                                                                   | Ywhag                 | 653           | 841           | 53              | 79              |
|           | P68510    | 14-3-3 protein eta                                                                     | Ywhah                 | 707           | 962           | 58              | 80              |
|           | Q61937    | Nucleophosmin (NPM) (Nucleolar phosphoprotein B23) (Numatrin) (Nucleolar protein NO38) | Npm1                  | 92            | 66            | 11              | 15              |
|           | O70456    | 14-3-3 protein sigma (Stratifin)                                                       | Sfn (Mkrn3)           | 573           | 666           | 56              | 71              |
|           | P63101    | 14-3-3 protein zeta/delta (Protein kinase C inhibitor protein 1) (KCIP-1) (SEZ-2)      | Ywhaz                 | 1383          | 1947          | 96              | 120             |
|           | Q61316    | Heat shock 70 kDa protein 4 (Heat shock 70-related protein APG-2)                      | Hspa4 (Apg2) (Hsp110) | 379           | 792           | 42              | 52              |

|        |                                                                                                                                                                                                             |                                    |      |      |     |     |
|--------|-------------------------------------------------------------------------------------------------------------------------------------------------------------------------------------------------------------|------------------------------------|------|------|-----|-----|
| P80315 | T-complex protein 1 subunit delta (TCP-1-delta) (CCT-delta) (A45)                                                                                                                                           | Cct4 (Cctd)                        | 61   | 59   | 15  | 18  |
| P54103 | DnaJ homolog subfamily C member 2 (Zuotin-related factor 1) (Mouse Id associate 1) (MIDA1)                                                                                                                  | Dnajc2 (Mida1) (Zrf1)              | 23   | 27   | 11  | 13  |
| P80313 | T-complex protein 1 subunit eta (TCP-1-eta) (CCT-eta)                                                                                                                                                       | Cct7 (Ccth)                        | 49   | 50   | 11  | 13  |
| Q9CQV8 | 14-3-3 protein beta/alpha (Protein kinase C inhibitor protein 1) (KCIP-1)                                                                                                                                   | Ywhab                              | 983  | 971  | 71  | 80  |
| Q62446 | FK506-binding protein 3 (EC 5.2.1.8) (Peptidyl-prolyl cis-trans isomerase) (PPIase) (Rotamase) (25 kDa FKBP) (FKBP-25) (Rapamycin-selective 25 kDa immunophilin)                                            | Fkbp3 (Fkbp25)                     | 31   | 31   | 10  | 11  |
| P07901 | Heat shock protein HSP 90-alpha (HSP 86) (Tumor-specific transplantation 86 kDa antigen) (TSTA)                                                                                                             | Hsp90aa1 (Hsp86) (Hsp86-1) (Hspca) | 1529 | 2324 | 134 | 146 |
| P38647 | Stress-70 protein, mitochondrial (75 kDa glucose-regulated protein) (GRP 75) (Heat shock 70 kDa protein 9) (Peptide-binding protein 74) (PBP74) (P66 MOT) (Mortalin)                                        | Hspa9 (Grp75) (Hsp74) (Hspa9a)     | 33   | 33   | 12  | 13  |
| P08113 | Endoplasmic reticulum chaperone protein (Heat shock protein 90 kDa beta member 1) (94 kDa glucose-regulated protein) (GRP94) (ERP99) (Polymorphic tumor rejection antigen 1) (Tumor rejection antigen gp96) | Hsp90b1 (Tra-1) (Tra1)             | 221  | 298  | 25  | 27  |
| P11984 | T-complex protein 1 subunit alpha A (TCP-1-alpha) (CCT-alpha) (Tailless complex polypeptide 1A) (TCP-1-A)                                                                                                   | Cct1 (Ccta) (Tcp1)                 | 29   | 66   | 14  | 15  |
| P30416 | FK506-binding protein 4 (EC 5.2.1.8) (Peptidyl-prolyl cis-trans isomerase) (PPIase) (Rotamase) (HSP-binding immunophilin) (HBI) (FKBP52 protein) (52 kDa FK506-binding protein) (FKBP59) (p59 protein)      | Fkbp4                              | 40   | 62   | 8   | 8   |

|        |                                                                                                                                                   |                                    |      |      |     |     |
|--------|---------------------------------------------------------------------------------------------------------------------------------------------------|------------------------------------|------|------|-----|-----|
| P68254 | 14-3-3 protein theta (14-3-3 protein tau)                                                                                                         | Ywhaq                              | 1104 | 994  | 92  | 91  |
| P11499 | Heat shock protein HSP 90-beta (HSP 84) (Tumor-specific transplantation 84 kDa antigen) (TSTA)                                                    | Hsp90ab1 (Hsp84) (Hsp84-1) (Hspcb) | 2943 | 3523 | 208 | 205 |
| Q9CQN1 | Heat shock protein 75 kDa, mitochondrial (HSP 75) (Tumor necrosis factor type 1 receptor-associated protein) (TRAP-1) (TNFR-associated protein 1) | Trap1 (Hsp75)                      | 197  | 335  | 13  | 11  |
| P20029 | 78 kDa glucose-regulated protein (GRP 78) (Heat shock 70 kDa protein 5) (Immunoglobulin heavy chain-binding protein) (BiP)                        | Hspa5 (Grp78)                      | 262  | 312  | 25  | 21  |
| P11983 | T-complex protein 1 subunit alpha B (TCP-1-alpha) (CCT-alpha) (Tailless complex polypeptide 1B) (TCP-1-B)                                         | Cct1 (Ccta) (Tcp1)                 | 29   | 66   | 18  | 15  |
| P80316 | T-complex protein 1 subunit epsilon (TCP-1-epsilon) (CCT-epsilon)                                                                                 | Cct5 (Ccte) (Kiaa0098)             | 239  | 102  | 17  | 14  |
| P62259 | 14-3-3 protein epsilon (14-3-3E)                                                                                                                  | Ywhae                              | 1202 | 998  | 116 | 95  |
| P16627 | Heat shock 70 kDa protein 1L (Heat shock 70 kDa protein 1-like) (Heat shock 70 kDa-like protein 1) (Spermatid-specific heat shock protein 70)     | Hspa1l (Hsc70t)                    | 319  | 238  | 33  | 25  |
| Q61696 | Heat shock 70 kDa protein 1A (Heat shock 70 kDa protein 3) (HSP70.3) (Hsp68)                                                                      | Hspa1a (Hsp70-3) (Hsp70A1)         | 266  | 236  | 33  | 24  |
| Q61699 | Heat shock protein 105 kDa (Heat shock-related 100 kDa protein E7I) (HSP-E7I) (Heat shock 110 kDa protein) (42 degrees C-HSP)                     | Hsph1 (Hsp105) (Hsp110) (Kiaa0201) | 46   | 48   | 18  | 13  |
| P42932 | T-complex protein 1 subunit theta (TCP-1-theta) (CCT-theta)                                                                                       | Cct8 (Cctq)                        | 197  | 57   | 23  | 15  |
| P17156 | Heat shock-related 70 kDa protein 2 (Heat shock protein 70.2)                                                                                     | Hspa2 (Hcp70.2) (Hsp70-2)          | 964  | 544  | 60  | 37  |

|                      |        |                                                                                                                                                                          |                             |      |     |     |     |
|----------------------|--------|--------------------------------------------------------------------------------------------------------------------------------------------------------------------------|-----------------------------|------|-----|-----|-----|
|                      | P63038 | 60 kDa heat shock protein, mitochondrial (Heat shock protein 60) (HSP-60) (Hsp60) (60 kDa chaperonin) (Chaperonin 60) (CPN60) (Mitochondrial matrix protein P1) (HSP-65) | Hspd1 (Hsp60)               | 15   | 32  | 22  | 13  |
|                      | P80317 | T-complex protein 1 subunit zeta (TCP-1-zeta) (CCT-zeta) (CCT-zeta-1)                                                                                                    | Cct6a (Cct6) (Cctz) (Cctz1) | 160  | 52  | 22  | 13  |
|                      | P63017 | Heat shock cognate 71 kDa protein (Heat shock 70 kDa protein 8)                                                                                                          | Hspa8 (Hsc70) (Hsc73)       | 1719 | 959 | 119 | 70  |
|                      | Q61390 | T-complex protein 1 subunit zeta-2 (TCP-1-zeta-2) (CCT-zeta-2) (Cctz-2)                                                                                                  | Cct6b                       | 55   | 52  | 15  | 8   |
| Nucleic acid binding | P97311 | DNA replication licensing factor MCM6 (Mis5 homolog)                                                                                                                     | Mcm6 (Mcmd6) (Mis5)         | 110  | 395 | 20  | 38  |
|                      | O88705 | Potassium/sodium hyperpolarization-activated cyclic nucleotide-gated channel 3 (Hyperpolarization-activated cation channel 3) (HAC-3)                                    | Hcn3 (Hac3)                 | 75   | 67  | 8   | 15  |
|                      | P06745 | Glucose-6-phosphate isomerase (GPI) (EC 5.3.1.9) (Phosphoglucose isomerase) (PGI) (Phosphohexose isomerase) (PHI) (Neuroleukin) (NLK)                                    | Gpi (Gpi1)                  | 39   | 107 | 12  | 22  |
|                      | Q8R3C6 | Probable RNA-binding protein 19 (RNA-binding motif protein 19)                                                                                                           | Rbm19                       | 26   | 32  | 11  | 20  |
|                      | Q8BGQ1 | Uncharacterized protein C14orf133 homolog                                                                                                                                |                             | 23   | 28  | 5   | 9   |
|                      | Q99N50 | Synaptotagmin-like protein 2 (Exophilin-4)                                                                                                                               | Syt12 (Slp2)                | 26   | 77  | 10  | 18  |
|                      | P56716 | Oxygen-regulated protein 1 (Retinitis pigmentosa RP1 protein homolog)                                                                                                    | Rp1 (Orp1) (Rp1h)           | 31   | 49  | 58  | 104 |
|                      | Q9Z1R2 | Large proline-rich protein BAT3 (HLA-B-associated transcript 3)                                                                                                          | Bat3                        | 80   | 49  | 15  | 26  |



|        |                                                                                                                                                                                                                                          |                                                                                                                                                                               |      |      |     |     |
|--------|------------------------------------------------------------------------------------------------------------------------------------------------------------------------------------------------------------------------------------------|-------------------------------------------------------------------------------------------------------------------------------------------------------------------------------|------|------|-----|-----|
| Q9D009 | Putative octanoyltransferase, mitochondrial (EC 2.3.1.181) (Octanoyl-[acyl-carrier-protein]-protein N-octanoyltransferase) (Lipoyl/octanoyl transferase) (Lipoate-protein ligase B)                                                      |                                                                                                                                                                               | 38   | 42   | 11  | 19  |
| Q8BFQ9 | Kelch domain-containing protein 5                                                                                                                                                                                                        | Klhdc5 (Kiaa1340)                                                                                                                                                             | 30   | 22   | 10  | 17  |
| Q9Z129 | ATP-dependent DNA helicase Q1 (EC 3.6.1.-) (DNA-dependent ATPase Q1)                                                                                                                                                                     | Recql (Recql1)                                                                                                                                                                | 17   | 27   | 13  | 22  |
| P52480 | Pyruvate kinase isozymes M1/M2 (EC 2.7.1.40) (Pyruvate kinase muscle isozyme)                                                                                                                                                            | Pkm2 (Pk3) (Pykm)                                                                                                                                                             | 1954 | 3481 | 138 | 233 |
| Q8CGP2 | Histone H2B type 1-P                                                                                                                                                                                                                     | Hist1h2bp                                                                                                                                                                     | 436  | 999  | 46  | 77  |
| P57776 | Elongation factor 1-delta (EF-1-delta)                                                                                                                                                                                                   | Eef1d                                                                                                                                                                         | 109  | 35   | 3   | 5   |
| P62960 | Nuclease-sensitive element-binding protein 1 (Y-box-binding protein 1) (Y-box transcription factor) (YB-1) (CCAAT-binding transcription factor I subunit A) (CBF-A) (Enhancer factor I subunit A) (EFI-A) (DNA-binding protein B) (DBPB) | Ybx1 (Msy-1) (Msy1) (Nsep1) (Yb1)                                                                                                                                             | 56   | 126  | 6   | 10  |
| P35980 | 60S ribosomal protein L18                                                                                                                                                                                                                | Rpl18                                                                                                                                                                         | 32   | 22   | 51  | 85  |
| P62806 | Histone H4                                                                                                                                                                                                                               | Hist1h4a;<br>Hist1h4b (H4-53); Hist1h4c (H4-12);<br>Hist1h4d;<br>Hist1h4f;<br>Hist1h4h;<br>Hist1h4i;<br>Hist1h4j;<br>Hist1h4k;<br>Hist1h4m;<br>Hist2h4a (Hist2h4);<br>Hist4h4 | 815  | 1617 | 47  | 78  |

|        |                                                                                                                                                                          |                                   |     |     |    |    |
|--------|--------------------------------------------------------------------------------------------------------------------------------------------------------------------------|-----------------------------------|-----|-----|----|----|
| Q922U2 | Keratin, type II cytoskeletal 5 (Cytokeratin-5) (CK-5) (Keratin-5) (K5)                                                                                                  | Krt5 (Krt2-5)                     | 396 | 550 | 23 | 38 |
| Q64475 | Histone H2B type 1-B (h2B-143)                                                                                                                                           | Hist1h2bb                         | 436 | 999 | 46 | 75 |
| P15532 | Nucleoside diphosphate kinase A (NDP kinase A) (NDK A) (EC 2.7.4.6) (Tumor metastatic process-associated protein) (Metastasis inhibition factor NM23) (NDPK-A) (nm23-M1) | Nme1 (Nm23)                       | 150 | 261 | 8  | 13 |
| Q8BHG1 | Nardilysin (EC 3.4.24.61) (N-arginine dibasic convertase) (NRD convertase) (NRD-C)                                                                                       | Nrd1                              | 53  | 54  | 13 | 21 |
| Q501J6 | Probable ATP-dependent RNA helicase DDX17 (EC 3.6.1.-) (DEAD box protein 17)                                                                                             | Ddx17                             | 90  | 43  | 7  | 11 |
| Q6ZWX6 | Eukaryotic translation initiation factor 2 subunit 1 (Eukaryotic translation initiation factor 2 subunit alpha) (eIF-2-alpha) (EIF-2alpha) (EIF-2A)                      | Eif2s1 (Eif2a)                    | 27  | 177 | 7  | 11 |
| P62082 | 40S ribosomal protein S7                                                                                                                                                 | Rps7                              | 104 | 126 | 9  | 14 |
| P63158 | High mobility group protein B1 (High mobility group protein 1) (HMG-1)                                                                                                   | Hmgb1 (Hmg-1) (Hmg1)              | 153 | 405 | 25 | 38 |
| O55142 | 60S ribosomal protein L35a                                                                                                                                               | Rpl35a                            | 24  | 50  | 4  | 6  |
| Q3UDW8 | Heparan-alpha-glucosaminide N-acetyltransferase (EC 2.3.1.78) (Transmembrane protein 76)                                                                                 | Hgsnat (D8Ert354e) (Tmem76)       | 34  | 22  | 6  | 9  |
| Q7TN83 | Synaptotagmin-16 (Synaptotagmin XIV-related protein) (Synaptotagmin 14-like protein)                                                                                     | Syt16 (Strep14) (Syt14l) (Syt14r) | 20  | 38  | 6  | 9  |
| Q8BUG5 | Calcyphosin-2 (Calcyphosine-2)                                                                                                                                           | Caps2                             | 17  | 28  | 8  | 12 |
| Q62522 | Zona pellucida-binding protein 1 (Sp38)                                                                                                                                  | Zpbp (Zpbp1)                      | 38  | 42  | 8  | 12 |
| P50247 | Adenosylhomocysteinase (AdoHcyase) (EC 3.3.1.1) (S-adenosyl-L-homocysteine hydrolase) (Liver copper-binding protein) (CUBP)                                              | Ahcy                              | 90  | 106 | 10 | 15 |

|        |                                                                                                                                                                                                                                                       |                     |     |     |    |    |
|--------|-------------------------------------------------------------------------------------------------------------------------------------------------------------------------------------------------------------------------------------------------------|---------------------|-----|-----|----|----|
| P97868 | Retinoblastoma-binding protein 6 (p53-associated cellular protein of testis) (Proliferation potential-related protein) (Protein P2P-R)                                                                                                                | Rbbp6 (P2pr) (Pact) | 21  | 29  | 24 | 35 |
| Q3THW5 | Histone H2A.V (H2A.F/Z)                                                                                                                                                                                                                               | H2afv (H2av)        | 297 | 426 | 11 | 16 |
| P60335 | Poly(rC)-binding protein 1 (Alpha-CP1) (hnRNP-E1)                                                                                                                                                                                                     | Pcbp1               | 56  | 350 | 9  | 13 |
| O70251 | Elongation factor 1-beta (EF-1-beta)                                                                                                                                                                                                                  | Eef1b (Eef1b2)      | 39  | 102 | 7  | 10 |
| Q9WVP9 | Interferon-induced GTP-binding protein Mx2 (Myxovirus resistance protein 2)                                                                                                                                                                           | Mx2                 | 32  | 22  | 14 | 20 |
| P70696 | Histone H2B type 1-A (Histone H2B, testis) (Testis-specific histone H2B)                                                                                                                                                                              | Hist1h2ba (Th2b)    | 146 | 378 | 37 | 51 |
| P17047 | Lysosome-associated membrane glycoprotein 2 (LAMP-2) (Lysosomal membrane glycoprotein type B) (LGP-B) (CD107 antigen-like family member B) (CD antigen CD107b)                                                                                        | Lamp2 (Lamp-2)      | 26  | 29  | 8  | 11 |
| P27641 | ATP-dependent DNA helicase 2 subunit 2 (EC 3.6.1.-) (ATP-dependent DNA helicase II 80 kDa subunit) (Ku autoantigen protein p86 homolog) (Ku80) (CTC box-binding factor 85 kDa subunit) (CTCBF) (CTC85) (Nuclear factor IV) (DNA repair protein XRCC5) | Xrcc5 (G22p2)       | 22  | 29  | 16 | 22 |
| Q61937 | Nucleophosmin (NPM) (Nucleolar phosphoprotein B23) (Numatrin) (Nucleolar protein NO38)                                                                                                                                                                | Npm1                | 92  | 66  | 11 | 15 |
| Q61789 | Laminin subunit alpha-3 (Nicein subunit alpha)                                                                                                                                                                                                        | Lama3               | 26  | 26  | 37 | 50 |
| P47867 | Secretogranin-3 (Secretogranin III) (SgIII)                                                                                                                                                                                                           | Scg3                | 21  | 26  | 6  | 8  |

|        |                                                                                                                                                                                                                                                                                        |                                  |      |      |     |     |
|--------|----------------------------------------------------------------------------------------------------------------------------------------------------------------------------------------------------------------------------------------------------------------------------------------|----------------------------------|------|------|-----|-----|
| Q9WTX2 | Interferon-inducible double stranded RNA-dependent protein kinase activator A (Protein kinase, interferon-inducible double stranded RNA-dependent activator) (Protein activator of the interferon-induced protein kinase) (PKR-associated protein X) (PKR-associating protein X) (RAX) | Prkra (Rax)                      | 28   | 39   | 9   | 12  |
| Q5SXJ3 | Fanconi anemia group J protein homolog (Protein FACJ) (EC 3.6.1.-) (ATP-dependent RNA helicase BRIP1) (BRCA1-interacting protein C-terminal helicase 1) (BRCA1-interacting protein 1) (BRCA1-associated C-terminal helicase 1)                                                         | Brip1 (Bach1) (Fancj)            | 25   | 18   | 13  | 17  |
| Q921C5 | Protein bicaudal D homolog 2 (Bic-D 2)                                                                                                                                                                                                                                                 | Bicd2 (Kiaa0699)                 | 31   | 23   | 26  | 34  |
| P63163 | Small nuclear ribonucleoprotein-associated protein N (snRNP-N) (Sm protein N) (Sm-N) (SmN) (Sm-D) (Tissue-specific-splicing protein)                                                                                                                                                   | Snrpn (Smn)                      | 38   | 17   | 7   | 9   |
| Q7TQ07 | DNA polymerase nu (EC 2.7.7.7)                                                                                                                                                                                                                                                         | Poln                             | 20   | 39   | 14  | 18  |
| Q07133 | Histone H1t (Testicular H1 histone)                                                                                                                                                                                                                                                    | Hist1h1t (H1ft) (H1t)            | 46   | 72   | 54  | 69  |
| Q61496 | Probable ATP-dependent RNA helicase DDX4 (EC 3.6.1.-) (DEAD box protein 4) (Vasa homolog) (Mvh)                                                                                                                                                                                        | Ddx4 (Vasa)                      | 17   | 25   | 44  | 56  |
| Q923B1 | Lariat debranching enzyme (EC 3.1.-.-)                                                                                                                                                                                                                                                 | Dbr1                             | 28   | 29   | 15  | 19  |
| P27661 | Histone H2A.x (H2a/x)                                                                                                                                                                                                                                                                  | H2afx (H2a.x) (H2ax) (Hist5-2ax) | 301  | 426  | 15  | 19  |
| Q62093 | Splicing factor, arginine/serine-rich 2 (Splicing factor SC35) (SC-35) (Splicing component, 35 kDa) (Protein PR264) (Putative myelin regulatory factor 1) (MRF-1)                                                                                                                      | Sfrs2 (Pr264) (Sfrs10)           | 184  | 117  | 15  | 19  |
| P20152 | Vimentin                                                                                                                                                                                                                                                                               | Vim                              | 1749 | 2397 | 125 | 157 |
| Q80X50 | Ubiquitin-associated protein 2-like                                                                                                                                                                                                                                                    | Ubap2l                           | 63   | 54   | 4   | 5   |

|        |                                                                                                                                                                                                                             |                           |     |     |     |     |
|--------|-----------------------------------------------------------------------------------------------------------------------------------------------------------------------------------------------------------------------------|---------------------------|-----|-----|-----|-----|
| O09010 | Beta-1,3-N-acetylglucosaminyltransferase lunatic fringe (EC 2.4.1.222) (O-fucosylpeptide 3-beta-N-acetylglucosaminyltransferase)                                                                                            | Lfng                      | 33  | 33  | 8   | 10  |
| P17183 | Gamma-enolase (EC 4.2.1.11) (2-phospho-D-glycerate hydro-lyase) (Neural enolase) (Neuron-specific enolase) (NSE) (Enolase 2)                                                                                                | Eno2 (Eno-2)              | 228 | 181 | 12  | 15  |
| Q63ZW7 | InaD-like protein (Inadl protein) (Pals1-associated tight junction protein) (Protein associated to tight junctions) (Channel-interacting PDZ domain-containing protein)                                                     | Inadl (Cipp) (Patj)       | 18  | 30  | 12  | 15  |
| P31001 | Desmin                                                                                                                                                                                                                      | Des                       | 169 | 224 | 25  | 31  |
| Q811J3 | Iron-responsive element-binding protein 2 (IREBP 2) (Iron regulatory protein 2) (IRP2)                                                                                                                                      | Ireb2 (Irp2)              | 69  | 119 | 142 | 176 |
| Q61316 | Heat shock 70 kDa protein 4 (Heat shock 70-related protein APG-2)                                                                                                                                                           | Hspa4 (Apg2) (Hsp110)     | 379 | 792 | 42  | 52  |
| Q8BU30 | Isoleucyl-tRNA synthetase, cytoplasmic (EC 6.1.1.5) (Isoleucine--tRNA ligase) (IleRS) (IRS)                                                                                                                                 | Iars                      | 85  | 46  | 30  | 37  |
| Q8BGD9 | Eukaryotic translation initiation factor 4B (eIF-4B)                                                                                                                                                                        | Eif4b                     | 238 | 306 | 13  | 16  |
| Q61466 | SWI/SNF-related matrix-associated actin-dependent regulator of chromatin subfamily D member 1 (SWI/SNF complex 60 kDa subunit) (60 kDa BRG-1/Brm-associated factor subunit A) (BRG1-associated factor 60A) (D15KZ1 protein) | Smarcd1 (Baf60a) (D15Kz1) | 27  | 29  | 13  | 16  |
| P59270 | Galactosylgalactosylxylosylprotein 3-beta-glucuronosyltransferase 2 (EC 2.4.1.135) (Beta-1,3-glucuronyltransferase 2) (UDP-glucuronosyltransferase-S) (Glucuronosyltransferase-S) (GlcAT-S) (GlcAT-D)                       | B3gat2 (Glcats)           | 29  | 16  | 9   | 11  |
| Q8VII8 | Mineralocorticoid receptor (MR) (Nuclear receptor subfamily 3 group C member 2)                                                                                                                                             | Nr3c2 (Mlr)               | 28  | 22  | 18  | 22  |

|        |                                                                                                                                                                                         |                            |     |     |     |     |
|--------|-----------------------------------------------------------------------------------------------------------------------------------------------------------------------------------------|----------------------------|-----|-----|-----|-----|
| Q35618 | Protein Mdm4 (p53-binding protein Mdm4) (Mdm2-like p53-binding protein) (Protein Mdmx) (Double minute 4 protein)                                                                        | Mdm4 (Mdmx)                | 17  | 29  | 5   | 6   |
| Q6PDM2 | Splicing factor, arginine/serine-rich 1 (ASF/SF2)                                                                                                                                       | Sfrs1                      | 24  | 91  | 5   | 6   |
| Q8VHS2 | Crumbs homolog 1                                                                                                                                                                        | Crb1                       | 23  | 28  | 10  | 12  |
| Q60848 | Lymphocyte-specific helicase (EC 3.6.1.-) (Proliferation associated SNF2-like protein)                                                                                                  | Hells (Lsh) (Pasg)         | 37  | 35  | 10  | 12  |
| P05784 | Keratin, type I cytoskeletal 18 (Cytokeratin-18) (CK-18) (Keratin-18) (K18) (Cytokeratin endo B) (Keratin D)                                                                            | Krt18 (Kerd) (Krt1-18)     | 37  | 46  | 10  | 12  |
| P54227 | Stathmin (Phosphoprotein p19) (pp19) (Leukemia-associated phosphoprotein p18) (Oncoprotein 18) (Op18) (pp17) (Prosolin) (Metablastin) (Protein Pr22) (Leukemia-associated gene protein) | Stmn1 (Lag) (Lap18) (Pr22) | 121 | 120 | 10  | 12  |
| Q9QUR6 | Prolyl endopeptidase (PE) (EC 3.4.21.26) (Post-proline cleaving enzyme)                                                                                                                 | Prep (Pep)                 | 56  | 20  | 15  | 18  |
| P80315 | T-complex protein 1 subunit delta (TCP-1-delta) (CCT-delta) (A45)                                                                                                                       | Cct4 (Cctd)                | 61  | 59  | 15  | 18  |
| Q9JKF1 | Ras GTPase-activating-like protein IQGAP1                                                                                                                                               | Iqgap1                     | 19  | 81  | 21  | 25  |
| O08810 | 116 kDa U5 small nuclear ribonucleoprotein component (U5 snRNP-specific protein, 116 kDa) (U5-116 kDa) (Elongation factor Tu GTP-binding domain-containing protein 2)                   | Eftud2 (Snrp116)           | 80  | 68  | 21  | 25  |
| P80313 | T-complex protein 1 subunit eta (TCP-1-eta) (CCT-eta)                                                                                                                                   | Cct7 (Ccth)                | 49  | 50  | 11  | 13  |
| Q8C3X4 | GTP-binding protein GUF1 homolog                                                                                                                                                        | Guf1                       | 311 | 506 | 412 | 483 |
| Q61171 | Peroxiredoxin-2 (EC 1.11.1.15) (Thioredoxin peroxidase 1) (Thioredoxin-dependent peroxide reductase 1) (Thiol-specific antioxidant protein) (TSA)                                       | Prdx2 (Tdp1) (Tpx)         | 568 | 898 | 47  | 55  |
| Q80XA6 | RalBP1-associated Eps domain-containing protein 2 (RalBP1-interacting protein 2) (Partner of RalBP1)                                                                                    | Reps2 (Pob1)               | 33  | 31  | 6   | 7   |

|        |                                                                                                                                                                                                                                                                                                                    |                                  |     |     |     |     |
|--------|--------------------------------------------------------------------------------------------------------------------------------------------------------------------------------------------------------------------------------------------------------------------------------------------------------------------|----------------------------------|-----|-----|-----|-----|
| Q6GSS7 | Histone H2A type 2-A (H2A.2) (H2a-614) (H2a-615)                                                                                                                                                                                                                                                                   | Hist2h2aa1;<br>Hist2h2aa2        | 505 | 763 | 18  | 21  |
| P49718 | DNA replication licensing factor MCM5 (CDC46 homolog) (P1-CDC46)                                                                                                                                                                                                                                                   | Mcm5 (Cdc46) (Mcmd5)             | 40  | 20  | 18  | 21  |
| Q3UEN2 | Protein FAM35                                                                                                                                                                                                                                                                                                      | Fam35                            | 21  | 41  | 13  | 15  |
| Q5SPW0 | Vacuolar protein sorting-associated protein 54 (Tumor antigen SLP-8p homolog)                                                                                                                                                                                                                                      | Vps54                            | 36  | 28  | 13  | 15  |
| P48754 | Breast cancer type 1 susceptibility protein homolog                                                                                                                                                                                                                                                                | Brca1                            | 28  | 25  | 26  | 30  |
| Q9JKP5 | Muscleblind-like protein 1 (Triplet-expansion RNA-binding protein)                                                                                                                                                                                                                                                 | Mbnl1 (Exp) (Mbnl)               | 45  | 63  | 244 | 281 |
| Q9Z2K1 | Keratin, type I cytoskeletal 16 (Cytokeratin-16) (CK-16) (Keratin-16) (K16)                                                                                                                                                                                                                                        | Krt16 (Krt1-16)                  | 37  | 37  | 7   | 8   |
| Q9QWY8 | 130 kDa phosphatidylinositol 4,5-biphosphate-dependent ARF1 GTPase-activating protein (PIP2-dependent ARF1 GAP) (ADP-ribosylation factor-directed GTPase-activating protein 1) (ARF GTPase-activating protein 1) (Development and differentiation-enhancing factor 1) (Differentiation-enhancing factor 1) (DEF-1) | Ddef1 (Asap1) (Kiaa1249) (Shag1) | 26  | 23  | 14  | 16  |
| P62270 | 40S ribosomal protein S18 (Ke-3) (Ke3)                                                                                                                                                                                                                                                                             | Rps18                            | 210 | 209 | 15  | 17  |
| P55200 | Histone-lysine N-methyltransferase HRX (EC 2.1.1.43) (Zinc finger protein HRX) (ALL-1)                                                                                                                                                                                                                             | Mll (All1) (Hrx) (Mll1)          | 67  | 26  | 39  | 44  |
| P62908 | 40S ribosomal protein S3                                                                                                                                                                                                                                                                                           | Rps3                             | 778 | 762 | 39  | 44  |
| P40124 | Adenylyl cyclase-associated protein 1 (CAP 1)                                                                                                                                                                                                                                                                      | Cap1 (Cap)                       | 22  | 43  | 8   | 9   |
| Q91X97 | Neurocalcin-delta                                                                                                                                                                                                                                                                                                  | Ncald (D15Ert412e)               | 85  | 82  | 8   | 9   |
| Q921M3 | Splicing factor 3B subunit 3 (Spliceosome-associated protein 130) (SAP 130) (Pre-mRNA splicing factor SF3b 130 kDa subunit) (SF3b130)                                                                                                                                                                              | Sf3b3 (Kiaa0017)                 | 16  | 34  | 24  | 27  |

|        |                                                                                                                                                                                     |                            |      |      |     |     |
|--------|-------------------------------------------------------------------------------------------------------------------------------------------------------------------------------------|----------------------------|------|------|-----|-----|
| Q9WUU9 | 80 kDa MCM3-associated protein (Protein GANP)                                                                                                                                       | Mcm3ap (Ganp) (Map80)      | 48   | 32   | 17  | 19  |
| Q9WUF3 | CASP8-associated protein 2 (FLICE-associated huge protein)                                                                                                                          | Casp8ap2 (Flash)           | 28   | 16   | 26  | 29  |
| P26618 | Alpha-type platelet-derived growth factor receptor (EC 2.7.10.1) (PDGF-R-alpha) (CD140 antigen-like family member A) (CD antigen CD140a)                                            | Pdgfra                     | 37   | 73   | 160 | 178 |
| P19253 | 60S ribosomal protein L13a (Transplantation antigen P198) (Tum-P198 antigen)                                                                                                        | Rpl13a (P198) (Tstap198-7) | 27   | 65   | 9   | 10  |
| P62631 | Elongation factor 1-alpha 2 (EF-1-alpha-2) (Elongation factor 1 A-2) (eEF1A-2) (Statin S1)                                                                                          | Eef1a2 (Eef1a) (Str)       | 1275 | 1549 | 258 | 285 |
| Q93092 | Transaldolase (EC 2.2.1.2)                                                                                                                                                          | Taldo1 (Tal) (Taldo)       | 20   | 93   | 10  | 11  |
| Q9D8N0 | Elongation factor 1-gamma (EF-1-gamma) (eEF-1B gamma)                                                                                                                               | Eef1g                      | 31   | 85   | 11  | 12  |
| P49717 | DNA replication licensing factor MCM4 (CDC21 homolog) (P1-CDC21)                                                                                                                    | Mcm4 (Cdc21) (Mcmd4)       | 29   | 18   | 11  | 12  |
| Q3THS6 | S-adenosylmethionine synthetase isoform type 2 (AdoMet synthetase 2) (EC 2.5.1.6) (Methionine adenosyltransferase 2)                                                                | Mat2a                      | 26   | 42   | 11  | 12  |
| Q99KK9 | Probable histidyl-tRNA synthetase, mitochondrial (EC 6.1.1.21) (Histidine--tRNA ligase) (HisRS) (Histidine--tRNA ligase-like)                                                       | Hars2 (Harsl)              | 20   | 41   | 22  | 24  |
| Q6P9Z1 | SWI/SNF-related matrix-associated actin-dependent regulator of chromatin subfamily D member 3 (60 kDa BRG-1/Brm-associated factor subunit C) (BRG1-associated factor 60C) (mBAF60c) | Smarcd3 (Baf60c)           | 29   | 19   | 46  | 50  |
| P70298 | Homeobox protein cut-like 2 (Cut-like 2) (Homeobox protein Cux-2)                                                                                                                   | Cux2 (Cutl2)               | 30   | 22   | 12  | 13  |



|        |                                                                                                                                                                                                                                                                                                                                        |                                    |      |      |     |     |
|--------|----------------------------------------------------------------------------------------------------------------------------------------------------------------------------------------------------------------------------------------------------------------------------------------------------------------------------------------|------------------------------------|------|------|-----|-----|
| P38647 | Stress-70 protein, mitochondrial (75 kDa glucose-regulated protein) (GRP 75) (Heat shock 70 kDa protein 9) (Peptide-binding protein 74) (PBP74) (P66 MOT) (Mortalin)                                                                                                                                                                   | Hspa9 (Grp75) (Hsp74) (Hspa9a)     | 33   | 33   | 12  | 13  |
| Q8BKC5 | Importin-5 (Imp5) (Importin subunit beta-3) (Karyopherin beta-3) (Ran-binding protein 5) (RanBP5)                                                                                                                                                                                                                                      | Ipo5 (Kpnb3) (Ranbp5)              | 185  | 91   | 12  | 13  |
| P10126 | Elongation factor 1-alpha 1 (EF-1-alpha-1) (Elongation factor 1 A-1) (eEF1A-1) (Elongation factor Tu) (EF-Tu)                                                                                                                                                                                                                          | Eef1a1 (Eef1a)                     | 2004 | 2344 | 305 | 330 |
| P08113 | Endoplasmin (Heat shock protein 90 kDa beta member 1) (94 kDa glucose-regulated protein) (GRP94) (ERP99) (Polymorphic tumor rejection antigen 1) (Tumor rejection antigen gp96)                                                                                                                                                        | Hsp90b1 (Tra-1) (Tra1)             | 221  | 298  | 25  | 27  |
| Q9Z104 | SWI/SNF-related matrix-associated actin-dependent regulator of chromatin subfamily E member 1-related (SMARCE1-related protein) (HMG box-containing protein 20B) (Structural DNA-binding protein BRAF35) (BRCA2-associated factor 35)                                                                                                  | Hmg20b (Braf35) (Hmgx2) (Smarce1r) | 30   | 20   | 14  | 15  |
| Q8CH62 | Oral cancer overexpressed protein 1 homolog                                                                                                                                                                                                                                                                                            | Oraov1                             | 37   | 31   | 14  | 15  |
| P11984 | T-complex protein 1 subunit alpha A (TCP-1-alpha) (CCT-alpha) (Tailless complex polypeptide 1A) (TCP-1-A)                                                                                                                                                                                                                              | Cct1 (Ccta) (Tcp1)                 | 29   | 66   | 14  | 15  |
| P70398 | Probable ubiquitin carboxyl-terminal hydrolase FAF-X (EC 3.1.2.15) (Ubiquitin thioesterase FAF-X) (Ubiquitin-specific-processing protease FAF-X) (Deubiquitinating enzyme FAF-X) (Fat facets protein-related, X-linked) (Ubiquitin-specific protease 9, X chromosome) (Ubiquitin carboxyl-terminal hydrolase FAM) (Fat facets homolog) | Usp9x (Faf1) (Fam)                 | 42   | 28   | 57  | 61  |

|        |                                                                                                                                                                                        |                               |      |      |    |    |
|--------|----------------------------------------------------------------------------------------------------------------------------------------------------------------------------------------|-------------------------------|------|------|----|----|
| Q8BKX6 | Serine/threonine-protein kinase SMG1 (SMG-1) (EC 2.7.11.1)                                                                                                                             | Smg1 (Kiaa0421)               | 33   | 27   | 30 | 32 |
| P16858 | Glyceraldehyde-3-phosphate dehydrogenase (GAPDH) (EC 1.2.1.12)                                                                                                                         | Gapdh (Gapd)                  | 1514 | 1781 | 84 | 89 |
| P62242 | 40S ribosomal protein S8                                                                                                                                                               | Rps8                          | 479  | 372  | 18 | 19 |
| Q76MZ3 | Serine/threonine-protein phosphatase 2A 65 kDa regulatory subunit A alpha isoform (PP2A, subunit A, PR65-alpha isoform) (PP2A, subunit A, R1-alpha isoform)                            | Ppp2r1a                       | 142  | 242  | 22 | 23 |
| P16546 | Spectrin alpha chain, brain (Spectrin, non-erythroid alpha chain) (Alpha-II spectrin) (Fodrin alpha chain)                                                                             | Sptan1 (Spna2) (Spta2)        | 68   | 86   | 66 | 69 |
| Q62504 | Msx2-interacting protein (SPEN homolog) (SMART/HDAC1-associated repressor protein)                                                                                                     | Spn (Kiaa0929) (Mint) (Sharp) | 27   | 18   | 72 | 75 |
| Q6P4S8 | Integrator complex subunit 1 (Int1)                                                                                                                                                    | Ints1                         | 25   | 33   | 26 | 27 |
| P62281 | 40S ribosomal protein S11                                                                                                                                                              | Rps11                         | 166  | 132  | 27 | 28 |
| Q8CGM2 | Retinitis pigmentosa 1-like 1 protein (Retinitis pigmentosa 1-like protein 1)                                                                                                          | Rp111 (Rp1hl1)                | 30   | 21   | 58 | 60 |
| P09586 | Prolactin-3B1 (Chorionic somatomammotropin hormone 2) (Placental lactogen II) (PL-II)                                                                                                  | Prl3b1 (Csh2) (PI-2) (PI2)    | 29   | 21   | 2  | 2  |
| P26350 | Prothymosin alpha [Cleaved into: Thymosin alpha]                                                                                                                                       | Ptma                          | 34   | 120  | 2  | 2  |
| P62141 | Serine/threonine-protein phosphatase PP1-beta catalytic subunit (PP-1B) (EC 3.1.3.16)                                                                                                  | Ppp1cb                        | 177  | 57   | 4  | 4  |
| Q8VCZ3 | THAP domain-containing protein 7                                                                                                                                                       | Thap7                         | 26   | 18   | 6  | 6  |
| O88693 | Ceramide glucosyltransferase (EC 2.4.1.80) (Glucosylceramide synthase) (GCS) (UDP-glucose:N-acylsphingosine D-glucosyltransferase) (UDP-glucose ceramide glucosyltransferase) (GLCT-1) | Ugcg                          | 37   | 50   | 7  | 7  |

|        |                                                                                                                                                      |                     |     |     |    |    |
|--------|------------------------------------------------------------------------------------------------------------------------------------------------------|---------------------|-----|-----|----|----|
| Q9R1P1 | Proteasome subunit beta type-3 (EC 3.4.25.1) (Proteasome theta chain) (Proteasome chain 13) (Proteasome component C10-II)                            | Psmb3               | 87  | 135 | 7  | 7  |
| Q8VC28 | Aldo-keto reductase family 1 member C13 (EC 1.1.1.-)                                                                                                 | Akr1c13             | 32  | 23  | 8  | 8  |
| Q9R190 | Metastasis-associated protein MTA2 (Metastasis-associated 1-like 1)                                                                                  | Mta2 (Mta111)       | 27  | 26  | 9  | 9  |
| Q99LX0 | Protein DJ-1 (Parkinson disease protein 7 homolog)                                                                                                   | Park7               | 53  | 178 | 9  | 9  |
| Q9D289 | Trafficking protein particle complex subunit 6B                                                                                                      | Trappc6b            | 62  | 69  | 9  | 9  |
| Q61781 | Keratin, type I cytoskeletal 14 (Cytokeratin-14) (CK-14) (Keratin-14) (K14)                                                                          | Krt14 (Krt1-14)     | 38  | 37  | 10 | 10 |
| Q9CQ60 | 6-phosphogluconolactonase (6PGL) (EC 3.1.1.31)                                                                                                       | Pgls                | 148 | 41  | 11 | 11 |
| Q9WV80 | Sorting nexin-1                                                                                                                                      | Snx1                | 23  | 49  | 11 | 11 |
| Q61092 | Laminin subunit gamma-2 (Laminin 5 gamma 2 subunit) (Kalinin/nicein/epiligrin 100 kDa subunit) (Laminin B2t chain)                                   | Lamc2               | 33  | 29  | 13 | 13 |
| Q9DB77 | Cytochrome b-c1 complex subunit 2, mitochondrial (Ubiquinol-cytochrome-c reductase complex core protein 2) (Core protein II) (Complex III subunit 2) | Uqcrc2              | 29  | 20  | 13 | 13 |
| P25206 | DNA replication licensing factor MCM3 (DNA polymerase alpha holoenzyme-associated protein P1) (P1-MCM3)                                              | Mcm3 (Mcmd) (Mcmd3) | 74  | 185 | 15 | 15 |
| Q01098 | Glutamate [NMDA] receptor subunit epsilon-3 (N-methyl D-aspartate receptor subtype 2C) (NMDAR2C) (NR2C)                                              | Grin2c              | 18  | 33  | 15 | 15 |
| P30681 | High mobility group protein B2 (High mobility group protein 2) (HMG-2)                                                                               | Hmgb2 (Hmg2)        | 94  | 222 | 24 | 24 |
| Q80UK8 | Integrator complex subunit 2 (Int2)                                                                                                                  | Ints2 (Kiaa1287)    | 16  | 27  | 24 | 24 |

|        |                                                                                                                                                                                                              |                                        |      |      |     |     |
|--------|--------------------------------------------------------------------------------------------------------------------------------------------------------------------------------------------------------------|----------------------------------------|------|------|-----|-----|
| P11499 | Heat shock protein HSP 90-beta (HSP 84) (Tumor-specific transplantation 84 kDa antigen) (TSTA)                                                                                                               | Hsp90ab1 (Hsp84) (Hsp84-1) (Hspcb)     | 2943 | 3523 | 208 | 205 |
| P58252 | Elongation factor 2 (EF-2)                                                                                                                                                                                   | Eef2                                   | 1630 | 1718 | 128 | 126 |
| Q91YE5 | Bromodomain adjacent to zinc finger domain protein 2A (Transcription termination factor I-interacting protein 5) (TTF-I-interacting protein 5) (Tip5)                                                        | Baz2a (Tip5)                           | 36   | 15   | 56  | 55  |
| P23116 | Eukaryotic translation initiation factor 3 subunit A (eIF3a) (Eukaryotic translation initiation factor 3 subunit 10) (eIF-3-theta) (eIF3 p167) (eIF3 p180) (eIF3 p185) (p162) (Centrosomin)                  | Eif3a (CsmA) (Eif3) (Eif3s10)          | 199  | 166  | 58  | 56  |
| Q8R4B8 | NACHT, LRR and PYD domains-containing protein 3 (Cold autoinflammatory syndrome 1 protein homolog) (Cryopyrin) (PYRIN-containing APAF1-like protein 1) (Mast cell maturation-associated-inducible protein 1) | Nlrp3 (Cias1) (Mmig1) (Nalp3) (Pypaf1) | 30   | 20   | 24  | 23  |
| Q8BGQ7 | Alanyl-tRNA synthetase, cytoplasmic (EC 6.1.1.7) (Alanine--tRNA ligase) (AlaRS)                                                                                                                              | Aars                                   | 179  | 216  | 23  | 22  |
| Q91V92 | ATP-citrate synthase (EC 2.3.3.8) (ATP-citrate (pro-S-)-lyase) (Citrate cleavage enzyme)                                                                                                                     | Acly                                   | 349  | 488  | 45  | 43  |
| Q8R1B4 | Eukaryotic translation initiation factor 3 subunit C (eIF3c) (Eukaryotic translation initiation factor 3 subunit 8) (eIF3 p110)                                                                              | Eif3c (Eif3s8)                         | 34   | 63   | 22  | 21  |
| P54869 | Hydroxymethylglutaryl-CoA synthase, mitochondrial (HMG-CoA synthase) (EC 2.3.3.10) (3-hydroxy-3-methylglutaryl coenzyme A synthase)                                                                          | Hmgcs2                                 | 26   | 23   | 18  | 17  |
| P03966 | N-myc proto-oncogene protein                                                                                                                                                                                 | Mycn (Nmyc) (Nmyc1)                    | 65   | 46   | 18  | 17  |
| P97412 | Lysosomal-trafficking regulator (Beige protein) (CHS1 homolog)                                                                                                                                               | Lyst (Bg) (Chs1)                       | 46   | 27   | 33  | 31  |
| Q9CPR4 | 60S ribosomal protein L17                                                                                                                                                                                    | Rpl17                                  | 187  | 135  | 15  | 14  |

|        |                                                                                                                                                                                             |                                   |     |     |    |    |
|--------|---------------------------------------------------------------------------------------------------------------------------------------------------------------------------------------------|-----------------------------------|-----|-----|----|----|
| Q99PF4 | Cadherin-23 (Otocadherin)                                                                                                                                                                   | Cdh23                             | 29  | 32  | 29 | 27 |
| Q8CGC6 | RNA-binding protein 28 (RNA-binding motif protein 28)                                                                                                                                       | Rbm28                             | 24  | 41  | 71 | 66 |
| Q9D6Z1 | Nucleolar protein 5A (Nucleolar protein Nop56)                                                                                                                                              | Nol5a (Nop56)                     | 38  | 39  | 14 | 13 |
| Q8R5G7 | Centaurin-delta-3 (Cnt-d3) (Arf-GAP, Rho-GAP, ankyrin repeat and pleckstrin homology domain-containing protein 3) (Dual specificity Rho- and Arf-GTPase-activating protein 1)               | Centd3 (Arap3) (Drag1) (Kiaa4097) | 21  | 27  | 26 | 24 |
| Q7TMY8 | E3 ubiquitin-protein ligase HUWE1 (EC 6.3.2.-) (HECT, UBA and WWE domain-containing protein 1) (Upstream regulatory element-binding protein 1) (URE-binding protein 1) (URE-B1) (E3Histone) | Huwe1 (Kiaa0312) (Ureb1)          | 33  | 91  | 39 | 36 |
| Q8CGC7 | Bifunctional aminoacyl-tRNA synthetase [Includes: Glutamyl-tRNA synthetase (EC 6.1.1.17) (Glutamate--tRNA ligase); Prolyl-tRNA synthetase (EC 6.1.1.15) (Proline--tRNA ligase)]             | Eprs (Qprs)                       | 130 | 102 | 32 | 29 |
| P43277 | Histone H1.3 (H1 VAR.4) (H1d)                                                                                                                                                               | Hist1h1d (H1f3)                   | 78  | 99  | 18 | 16 |
| Q9QXA7 | Tripartite motif-containing protein 44 (Protein DIPB) (Protein Mc7)                                                                                                                         | Trim44 (Dipb)                     | 28  | 23  | 18 | 16 |
| Q68FD5 | Clathrin heavy chain 1                                                                                                                                                                      | Cltc                              | 944 | 884 | 88 | 78 |
| Q9DBJ1 | Phosphoglycerate mutase 1 (EC 5.4.2.1) (EC 5.4.2.4) (EC 3.1.3.13) (Phosphoglycerate mutase isozyme B) (PGAM-B) (BPG-dependent PGAM 1)                                                       | Pgam1                             | 612 | 746 | 35 | 31 |
| Q99PG2 | Opioid growth factor receptor (OGFr) (Zeta-type opioid receptor)                                                                                                                            | Ogfr                              | 38  | 24  | 8  | 7  |
| Q924C1 | Exportin-5 (Exp5) (Ran-binding protein 21)                                                                                                                                                  | Xpo5 (Kiaa1291) (Ranbp21)         | 20  | 62  | 15 | 13 |

|        |                                                                                                                                                                                                   |                   |     |     |    |    |
|--------|---------------------------------------------------------------------------------------------------------------------------------------------------------------------------------------------------|-------------------|-----|-----|----|----|
| P21550 | Beta-enolase (EC 4.2.1.11) (2-phospho-D-glycerate hydro-lyase) (Muscle-specific enolase) (MSE) (Skeletal muscle enolase) (Enolase 3)                                                              | Eno3 (Eno-3)      | 313 | 146 | 30 | 26 |
| P67984 | 60S ribosomal protein L22 (Heparin-binding protein HBp15)                                                                                                                                         | Rpl22             | 59  | 48  | 7  | 6  |
| Q9CYF5 | Williams-Beuren syndrome chromosomal region 16 protein homolog                                                                                                                                    | Wbscr16           | 38  | 28  | 7  | 6  |
| P35979 | 60S ribosomal protein L12                                                                                                                                                                         | Rpl12             | 208 | 389 | 14 | 12 |
| P97784 | Cryptochrome-1                                                                                                                                                                                    | Cry1              | 52  | 42  | 21 | 18 |
| Q9R194 | Cryptochrome-2                                                                                                                                                                                    | Cry2 (Kiaa0658)   | 52  | 42  | 21 | 18 |
| Q9CZM2 | 60S ribosomal protein L15                                                                                                                                                                         | Rpl15             | 225 | 107 | 21 | 18 |
| Q6ZWN5 | 40S ribosomal protein S9                                                                                                                                                                          | Rps9              | 459 | 248 | 47 | 40 |
| Q91VW5 | Golgin subfamily A member 4 (tGolgin-1)                                                                                                                                                           | Golga4            | 41  | 60  | 46 | 39 |
| Q9R0L6 | Pericentriolar material 1 protein (PCM-1) (mPCM-1)                                                                                                                                                | Pcm1              | 24  | 30  | 19 | 16 |
| P14131 | 40S ribosomal protein S16                                                                                                                                                                         | Rps16             | 160 | 126 | 19 | 16 |
| P20029 | 78 kDa glucose-regulated protein (GRP 78) (Heat shock 70 kDa protein 5) (Immunoglobulin heavy chain-binding protein) (BiP)                                                                        | Hspa5 (Grp78)     | 262 | 312 | 25 | 21 |
| P46664 | Adenylosuccinate synthetase isozyme 2 (AMPSase 2) (AdSS 2) (EC 6.3.4.4) (Adenylosuccinate synthetase, non-muscle isozyme) (Adenylosuccinate synthetase, acidic isozyme) (IMP--aspartate ligase 2) | Adss (Adss2)      | 36  | 66  | 12 | 10 |
| Q8R4U0 | Stabilin-2 (Fasciclin, EGF-like, laminin-type EGF-like and link domain-containing scavenger receptor 2) (FEEL-2) [Cleaved into: Short form stabilin-2]                                            | Stab2 (Feel2)     | 25  | 43  | 12 | 10 |
| Q99PP7 | E3 ubiquitin-protein ligase TRIM33 (EC 6.3.2.-) (Tripartite motif-containing protein 33) (Transcription intermediary factor 1-gamma) (TIF1-gamma) (Ectodermin homolog)                            | Trim33 (Kiaa1113) | 33  | 25  | 12 | 10 |

|        |                                                                                                                                                                                        |                               |     |     |    |    |
|--------|----------------------------------------------------------------------------------------------------------------------------------------------------------------------------------------|-------------------------------|-----|-----|----|----|
| Q05816 | Fatty acid-binding protein, epidermal (E-FABP) (Fatty acid-binding protein 5) (Psoriasis-associated fatty acid-binding protein homolog) (PA-FABP) (Keratinocyte lipid-binding protein) | Fabp5 (Fabpe) (Klbp) (Mal1)   | 331 | 206 | 18 | 15 |
| P11983 | T-complex protein 1 subunit alpha B (TCP-1-alpha) (CCT-alpha) (Tailless complex polypeptide 1B) (TCP-1-B)                                                                              | Cct1 (Ccta) (Tcp1)            | 29  | 66  | 18 | 15 |
| P09405 | Nucleolin (Protein C23)                                                                                                                                                                | Ncl (Nuc)                     | 775 | 872 | 78 | 65 |
| Q91XQ0 | Dynein heavy chain 8, axonemal (Axonemal beta dynein heavy chain 8) (Ciliary dynein heavy chain 8)                                                                                     | Dnahc8                        | 47  | 51  | 77 | 64 |
| P80316 | T-complex protein 1 subunit epsilon (TCP-1-epsilon) (CCT-epsilon)                                                                                                                      | Cct5 (Ccte) (Kiaa0098)        | 239 | 102 | 17 | 14 |
| P14206 | 40S ribosomal protein SA (Laminin receptor 1) (p40) (34/67 kDa laminin receptor) (37 kDa oncofetal antigen) (OFA/iLRP)                                                                 | Rpsa (Lamr1) (P40-8)          | 131 | 112 | 11 | 9  |
| Q6ZQ38 | Cullin-associated NEDD8-dissociated protein 1 (Cullin-associated and neddylation-dissociated protein 1) (p120 CAND1)                                                                   | Cand1 (D10Erd516e) (Kiaa0829) | 221 | 246 | 33 | 27 |
| P42227 | Signal transducer and activator of transcription 3 (Acute-phase response factor)                                                                                                       | Stat3 (Aprf)                  | 16  | 28  | 33 | 27 |
| Q569Z5 | Probable ATP-dependent RNA helicase DDX46 (EC 3.6.1.-) (DEAD box protein 46)                                                                                                           | Ddx46 (Kiaa0801)              | 25  | 17  | 21 | 17 |
| P17182 | Alpha-enolase (EC 4.2.1.11) (2-phospho-D-glycerate hydro-lyase) (Non-neural enolase) (NNE) (Enolase 1)                                                                                 | Eno1 (Eno-1)                  | 976 | 802 | 62 | 50 |
| Q924C6 | Lysyl oxidase homolog 4 (EC 1.4.3.-) (Lysyl oxidase-like protein 4) (Lysyl oxidase-related protein C)                                                                                  | Loxl4 (Loxc)                  | 15  | 28  | 5  | 4  |
| Q5XJY5 | Coatomer subunit delta (Delta-coat protein) (Delta-COP) (Archain)                                                                                                                      | Arcn1 (Copd)                  | 61  | 45  | 10 | 8  |
| Q9Z1M8 | Protein Red (Protein RER) (IK factor) (Cytokine IK)                                                                                                                                    | Ik (Red) (Rer)                | 29  | 23  | 10 | 8  |

|        |                                                                                                                                         |                                        |      |     |     |     |
|--------|-----------------------------------------------------------------------------------------------------------------------------------------|----------------------------------------|------|-----|-----|-----|
| Q9Z2U0 | Proteasome subunit alpha type-7 (EC 3.4.25.1) (Proteasome subunit RC6-1)                                                                | Psm7                                   | 121  | 253 | 15  | 12  |
| P12970 | 60S ribosomal protein L7a (Surfeit locus protein 3)                                                                                     | Rpl7a (Surf-3) (Surf3)                 | 111  | 31  | 15  | 12  |
| Q99MD9 | Nuclear autoantigenic sperm protein (NASP)                                                                                              | Nasp                                   | 365  | 293 | 34  | 27  |
| Q8BP67 | 60S ribosomal protein L24                                                                                                               | Rpl24                                  | 354  | 214 | 24  | 19  |
| P63325 | 40S ribosomal protein S10                                                                                                               | Rps10                                  | 468  | 168 | 42  | 33  |
| Q9JHU4 | Cytoplasmic dynein 1 heavy chain 1 (Cytoplasmic dynein heavy chain 1) (Dynein heavy chain, cytosolic)                                   | Dync1h1 (Dhc1) (Dnch1) (Dnchc1) (Dyhc) | 822  | 395 | 157 | 123 |
| Q6A078 | Centrosomal protein of 290 kDa (Cep290) (Nephrocystin-6)                                                                                | Cep290 (Kiaa0373) (Nphp6)              | 32   | 57  | 85  | 66  |
| P06151 | L-lactate dehydrogenase A chain (LDH-A) (EC 1.1.1.27) (LDH muscle subunit) (LDH-M)                                                      | Ldha (Ldh-1) (Ldh1)                    | 1033 | 421 | 74  | 57  |
| P62748 | Hippocalcin-like protein 1 (Visinin-like protein 3) (VILIP-3) (Neural visinin-like protein 3) (NVL-3) (NVP-3)                           | Hpcal1                                 | 59   | 97  | 13  | 10  |
| P62702 | 40S ribosomal protein S4, X isoform                                                                                                     | Rps4x (Rps4)                           | 402  | 304 | 30  | 23  |
| Q8JZQ2 | AFG3-like protein 2 (EC 3.4.24.-)                                                                                                       | Afg3l2                                 | 15   | 27  | 17  | 13  |
| Q8BHS8 | Syntabulin (Syntaxin-1-binding protein) (Golgi-localized syntaphilin-related protein) (m-Golsyn)                                        | Sybu (Golsyn) (Kiaa1472)               | 32   | 19  | 17  | 13  |
| Q569Z6 | Thyroid hormone receptor-associated protein 3 (Thyroid hormone receptor-associated protein complex 150 kDa component) (Trap150)         | Thrap3 (Trap150)                       | 29   | 48  | 21  | 16  |
| Q99MY8 | Probable histone-lysine N-methyltransferase ASH1L (EC 2.1.1.43) (Absent small and homeotic disks protein 1 homolog) (ASH1-like protein) | Ash1l                                  | 19   | 31  | 46  | 35  |



|        |                                                                                                                                               |                          |     |     |    |    |
|--------|-----------------------------------------------------------------------------------------------------------------------------------------------|--------------------------|-----|-----|----|----|
| P16627 | Heat shock 70 kDa protein 1L (Heat shock 70 kDa protein 1-like) (Heat shock 70 kDa-like protein 1) (Spermatid-specific heat shock protein 70) | Hspa1l (Hsc70t)          | 319 | 238 | 33 | 25 |
| O70228 | Probable phospholipid-transporting ATPase IIA (EC 3.6.3.1) (ATPase class II type 9A)                                                          | Atp9a                    | 31  | 29  | 37 | 28 |
| Q9QYB1 | Chloride intracellular channel protein 4 (mc3s5/mtCLIC)                                                                                       | Clic4                    | 28  | 33  | 4  | 3  |
| P56480 | ATP synthase subunit beta, mitochondrial (EC 3.6.3.14)                                                                                        | Atp5b                    | 31  | 50  | 8  | 6  |
| Q02956 | Protein kinase C zeta type (EC 2.7.11.13) (nPKC-zeta)                                                                                         | Prkcz (PkcZ)             | 29  | 15  | 8  | 6  |
| P25233 | Necdin                                                                                                                                        | Ndn                      | 30  | 23  | 16 | 12 |
| P62751 | 60S ribosomal protein L23a                                                                                                                    | Rpl23a                   | 75  | 49  | 16 | 12 |
| Q9D8V0 | Minor histocompatibility antigen H13 (EC 3.4.23.-) (Signal peptide peptidase) (Presenilin-like protein 3)                                     | Hm13 (H13) (Psi3)        | 23  | 29  | 28 | 21 |
| Q8R5F3 | Uncharacterized protein C6orf130 homolog                                                                                                      |                          | 64  | 29  | 31 | 23 |
| Q4VGL6 | Roquin (RING finger and C3H zinc finger protein 1) (Protein Sanroque)                                                                         | Rc3h1 (Gm551) (Kiaa2025) | 54  | 54  | 23 | 17 |
| P58681 | Toll-like receptor 7                                                                                                                          | Tlr7                     | 27  | 33  | 23 | 17 |
| P62264 | 40S ribosomal protein S14                                                                                                                     | Rps14                    | 163 | 166 | 15 | 11 |
| P25444 | 40S ribosomal protein S2 (S4) (LLRep3 protein)                                                                                                | Rps2 (Llrep3) (Rps4)     | 217 | 50  | 26 | 19 |
| Q61656 | Probable ATP-dependent RNA helicase DDX5 (EC 3.6.1.-) (DEAD box protein 5) (RNA helicase p68) (DEAD box RNA helicase DEAD1) (mDEAD1)          | Ddx5 (Tnz2)              | 90  | 43  | 11 | 8  |
| Q91Z67 | SLIT-ROBO Rho GTPase-activating protein 2 (srGAP2) (Formin-binding protein 2) (Formin-binding protein 27) (FBP-27)                            | Srgap2 (Fbp27) (Fnbp2)   | 77  | 48  | 11 | 8  |

|        |                                                                                                                            |                                                                  |     |     |    |    |
|--------|----------------------------------------------------------------------------------------------------------------------------|------------------------------------------------------------------|-----|-----|----|----|
| P62991 | Ubiquitin                                                                                                                  | Rps27a<br>(Uba80)<br>(Ubcep1);<br>Uba52<br>(Ubcep2);<br>Ubb; Ubc | 61  | 54  | 11 | 8  |
| Q61696 | Heat shock 70 kDa protein 1A (Heat shock 70 kDa protein 3) (HSP70.3) (Hsp68)                                               | Hspa1a<br>(Hsp70-3)<br>(Hsp70A1)                                 | 266 | 236 | 33 | 24 |
| Q9CR57 | 60S ribosomal protein L14                                                                                                  | Rpl14                                                            | 508 | 391 | 33 | 24 |
| P27659 | 60S ribosomal protein L3 (J1 protein)                                                                                      | Rpl3                                                             | 192 | 75  | 25 | 18 |
| Q9CQ65 | S-methyl-5'-thioadenosine phosphorylase (EC 2.4.2.28) (5'-methylthioadenosine phosphorylase) (MTA phosphorylase) (MTAPase) | Mtap                                                             | 48  | 36  | 7  | 5  |
| Q99LG2 | Transportin-2 (Karyopherin beta-2b)                                                                                        | Tnpo2                                                            | 42  | 32  | 7  | 5  |
| Q60673 | Receptor-type tyrosine-protein phosphatase-like N (R-PTP-N) (PTP IA-2)                                                     | Ptpn (Ptp35)                                                     | 30  | 18  | 14 | 10 |
| P14148 | 60S ribosomal protein L7                                                                                                   | Rpl7                                                             | 145 | 52  | 14 | 10 |
| Q03172 | Zinc finger protein 40 (Transcription factor alphaA-CRYBP1) (Alpha A-crystallin-binding protein I) (Alpha A-CRYBP1)        | Hivep1<br>(Cryabp1)<br>(Znf40)                                   | 25  | 24  | 21 | 15 |
| P17751 | Triosephosphate isomerase (TIM) (EC 5.3.1.1) (Triose-phosphate isomerase)                                                  | Tpi1 (Tpi)                                                       | 706 | 519 | 35 | 25 |
| P08551 | Neurofilament light polypeptide (NF-L) (Neurofilament triplet L protein) (68 kDa neurofilament protein)                    | Nefl (Nf68)<br>(Nfl)                                             | 51  | 36  | 17 | 12 |
| P51410 | 60S ribosomal protein L9                                                                                                   | Rpl9                                                             | 187 | 212 | 17 | 12 |
| Q6ZQ12 | Ninein-like protein                                                                                                        | Nlp (Kiaa0980)                                                   | 15  | 34  | 23 | 16 |
| Q91YJ5 | Translation initiation factor IF-2, mitochondrial (IF-2Mt) (IF2(mt)) (IF-2(Mt))                                            | Mtif2                                                            | 29  | 23  | 13 | 9  |

|        |                                                                                                                                                                                                                                 |                                          |     |     |     |    |
|--------|---------------------------------------------------------------------------------------------------------------------------------------------------------------------------------------------------------------------------------|------------------------------------------|-----|-----|-----|----|
| Q64707 | U2 small nuclear ribonucleoprotein auxiliary factor 35 kDa subunit-related protein 1 (U2(RNU2) small nuclear RNA auxiliary factor 1-like 1) (CCCH type zinc finger, RNA-binding motif and serine/arginine rich protein 1) (SP2) | Zrsr1 (Sp2) (Sp2-7) (U2af1rs1) (U2af111) | 34  | 22  | 13  | 9  |
| Q52KI8 | Serine/arginine repetitive matrix protein 1 (Plenty-of-prolines 101)                                                                                                                                                            | Srrm1 (Pop101)                           | 22  | 73  | 29  | 20 |
| Q99PV0 | Pre-mRNA-processing-splicing factor 8 (Splicing factor Prp8)                                                                                                                                                                    | Prpf8 (Prp8)                             | 28  | 29  | 51  | 35 |
| P68040 | Guanine nucleotide-binding protein subunit beta-2-like 1 (Receptor of activated protein kinase C 1) (RACK1) (Receptor for activated C kinase) (p205) (12-3)                                                                     | Gnb2l1 (Gnb2-rs1)                        | 541 | 153 | 35  | 24 |
| Q9QYC1 | Pecanex-like protein 1 (Pecanex homolog)                                                                                                                                                                                        | Pcnx (Kiaa0805) (Pcnx1)                  | 26  | 21  | 25  | 17 |
| P29391 | Ferritin light chain 1 (Ferritin L subunit 1)                                                                                                                                                                                   | Ftl1 (Ftl) (Ftl-1)                       | 150 | 159 | 6   | 4  |
| P43275 | Histone H1.1 (H1 VAR.3) (H1a)                                                                                                                                                                                                   | Hist1h1a (H1f1)                          | 28  | 90  | 9   | 6  |
| P61979 | Heterogeneous nuclear ribonucleoprotein K (hnRNP K)                                                                                                                                                                             | Hnrnpk (Hnrpk)                           | 225 | 46  | 18  | 12 |
| Q9Z0T6 | Polycystic kidney disease and receptor for egg jelly-related protein (PKD and REJ homolog)                                                                                                                                      | Pkdrej                                   | 32  | 32  | 18  | 12 |
| Q8K4L3 | Supervillin (Archvillin) (p205/p250)                                                                                                                                                                                            | Svil                                     | 25  | 22  | 18  | 12 |
| Q924W6 | Tripartite motif-containing protein 66 (Transcriptional intermediary factor 1 delta)                                                                                                                                            | Trim66 (Tif1d)                           | 28  | 18  | 23  | 15 |
| P40142 | Transketolase (TK) (EC 2.2.1.1) (P68)                                                                                                                                                                                           | Tkt                                      | 562 | 250 | 117 | 75 |
| Q9CXW4 | 60S ribosomal protein L11                                                                                                                                                                                                       | Rpl11                                    | 72  | 79  | 11  | 7  |
| Q8CG48 | Structural maintenance of chromosomes protein 2 (Chromosome-associated protein E) (XCAP-E homolog) (FGF-inducible protein 16)                                                                                                   | Smc2 (Cape) (Fin16) (Smc2l1)             | 32  | 36  | 41  | 26 |

|        |                                                                                                                                                                                                                                                                                                        |                             |     |     |    |    |
|--------|--------------------------------------------------------------------------------------------------------------------------------------------------------------------------------------------------------------------------------------------------------------------------------------------------------|-----------------------------|-----|-----|----|----|
| Q61983 | Sodium-dependent phosphate transport protein 1 (Sodium/phosphate cotransporter 1) (Na(+)/PI cotransporter 1) (Solute carrier family 17 member 1) (Renal sodium-dependent phosphate transport protein 1) (Renal sodium-phosphate transport protein 1) (Renal Na(+)-dependent phosphate cotransporter 1) | Slc17a1 (Npt1)              | 31  | 33  | 8  | 5  |
| Q9QZ09 | Putative homeodomain transcription factor 1                                                                                                                                                                                                                                                            | Phtf1 (Phtf)                | 29  | 24  | 8  | 5  |
| Q8C7H1 | Methylmalonic aciduria type A homolog, mitochondrial                                                                                                                                                                                                                                                   | Mmaa                        | 31  | 37  | 16 | 10 |
| Q80U87 | Ubiquitin carboxyl-terminal hydrolase 8 (EC 3.1.2.15) (Ubiquitin thioesterase 8) (Ubiquitin-specific-processing protease 8) (Deubiquitinating enzyme 8) (mUBPy)                                                                                                                                        | Usp8 (Kiaa0055) (Ubpy)      | 29  | 23  | 24 | 15 |
| P62717 | 60S ribosomal protein L18a                                                                                                                                                                                                                                                                             | Rpl18a                      | 242 | 62  | 21 | 13 |
| P17156 | Heat shock-related 70 kDa protein 2 (Heat shock protein 70.2)                                                                                                                                                                                                                                          | Hspa2 (Hcp70.2) (Hsp70-2)   | 964 | 544 | 60 | 37 |
| Q3UXZ6 | Protein FAM81A                                                                                                                                                                                                                                                                                         | Fam81a                      | 22  | 27  | 13 | 8  |
| P84099 | 60S ribosomal protein L19                                                                                                                                                                                                                                                                              | Rpl19                       | 39  | 47  | 13 | 8  |
| P62301 | 40S ribosomal protein S13                                                                                                                                                                                                                                                                              | Rps13                       | 77  | 100 | 23 | 14 |
| O08709 | Peroxiredoxin-6 (EC 1.11.1.15) (Antioxidant protein 2) (1-Cys peroxiredoxin) (1-Cys PRX) (Acidic calcium-independent phospholipase A2) (aiPLA2) (EC 3.1.1.-) (Non-selenium glutathione peroxidase) (NSGPx) (EC 1.11.1.7)                                                                               | Prdx6 (Aop2) (Ltw4) (Prdx5) | 56  | 29  | 5  | 3  |
| Q9D1R9 | 60S ribosomal protein L34                                                                                                                                                                                                                                                                              | Rpl34                       | 34  | 32  | 10 | 6  |
| Q6NZJ6 | Eukaryotic translation initiation factor 4 gamma 1 (eIF-4-gamma 1) (eIF-4G 1) (eIF-4G1)                                                                                                                                                                                                                | Eif4g1                      | 47  | 113 | 30 | 18 |
| P26040 | Ezrin (p81) (Cytovillin) (Villin-2)                                                                                                                                                                                                                                                                    | Ezr (Vil2)                  | 127 | 106 | 27 | 16 |

|        |                                                                                                                                                                          |                             |      |     |     |    |
|--------|--------------------------------------------------------------------------------------------------------------------------------------------------------------------------|-----------------------------|------|-----|-----|----|
| P63038 | 60 kDa heat shock protein, mitochondrial (Heat shock protein 60) (HSP-60) (Hsp60) (60 kDa chaperonin) (Chaperonin 60) (CPN60) (Mitochondrial matrix protein P1) (HSP-65) | Hspd1 (Hsp60)               | 15   | 32  | 22  | 13 |
| P10630 | Eukaryotic initiation factor 4A-II (eIF-4A-II) (eIF4A-II) (EC 3.6.1.-) (ATP-dependent RNA helicase eIF4A-2)                                                              | Eif4a2 (Ddx2b)              | 194  | 78  | 17  | 10 |
| P09041 | Phosphoglycerate kinase 2 (EC 2.7.2.3) (Phosphoglycerate kinase, testis specific)                                                                                        | Pgk2 (Pgk-2)                | 162  | 73  | 17  | 10 |
| P63017 | Heat shock cognate 71 kDa protein (Heat shock 70 kDa protein 8)                                                                                                          | Hspa8 (Hsc70) (Hsc73)       | 1719 | 959 | 119 | 70 |
| P62900 | 60S ribosomal protein L31                                                                                                                                                | Rpl31                       | 124  | 62  | 12  | 7  |
| P41105 | 60S ribosomal protein L28                                                                                                                                                | Rpl28                       | 49   | 41  | 19  | 11 |
| Q9CZX8 | 40S ribosomal protein S19                                                                                                                                                | Rps19                       | 206  | 146 | 19  | 11 |
| P47963 | 60S ribosomal protein L13 (A52)                                                                                                                                          | Rpl13                       | 744  | 379 | 47  | 27 |
| P53762 | Aryl hydrocarbon receptor nuclear translocator (ARNT protein) (Dioxin receptor, nuclear translocator) (Hypoxia-inducible factor 1 beta) (HIF-1 beta)                     | Arnt                        | 25   | 22  | 7   | 4  |
| Q9QUK4 | Baculoviral IAP repeat-containing protein 1b (Neuronal apoptosis inhibitory protein 2)                                                                                   | Naip2 (Birc1b) (Naip-rs6)   | 21   | 28  | 14  | 8  |
| P26043 | Radixin (ESP10)                                                                                                                                                          | Rdx                         | 127  | 106 | 23  | 13 |
| P49722 | Proteasome subunit alpha type-2 (EC 3.4.25.1) (Proteasome component C3) (Macropain subunit C3) (Multicatalytic endopeptidase complex subunit C3)                         | Psm2 (Lmpc3)                | 188  | 103 | 16  | 9  |
| Q9R1X4 | Protein timeless homolog (mTim)                                                                                                                                          | Timeless (Tim1) (Timeless1) | 22   | 25  | 16  | 9  |
| P97461 | 40S ribosomal protein S5                                                                                                                                                 | Rps5                        | 89   | 33  | 32  | 18 |
| Q8K219 | F-box only protein 18 (EC 3.6.1.-) (F-box DNA helicase 1)                                                                                                                | Fbxo18 (Fbh1) (Fbx18)       | 30   | 23  | 9   | 5  |

|             |                                                                                                                                                                                                                                     |                                                                                                              |                           |     |     |    |     |
|-------------|-------------------------------------------------------------------------------------------------------------------------------------------------------------------------------------------------------------------------------------|--------------------------------------------------------------------------------------------------------------|---------------------------|-----|-----|----|-----|
| P63073      | Eukaryotic translation initiation factor 4E (eIF-4E) (eIF4E) (mRNA cap-binding protein) (eIF-4F 25 kDa subunit)                                                                                                                     | Eif4e                                                                                                        | 110                       | 25  | 9   | 5  |     |
| Q8BYH8      | Chromodomain-helicase-DNA-binding protein 9 (CHD-9) (EC 3.6.1.-) (ATP-dependent helicase CHD9) (Peroxisomal proliferator-activated receptor A-interacting complex 320 kDa protein) (PPAR-alpha-interacting complex protein 320 kDa) | Chd9 (Kiaa0308) (Pric320)                                                                                    | 39                        | 27  | 49  | 27 |     |
| P17918      | Proliferating cell nuclear antigen (PCNA) (Cyclin)                                                                                                                                                                                  | Pcna                                                                                                         | 273                       | 207 | 20  | 11 |     |
| Q9WTU3      | Sodium channel protein type 8 subunit alpha (Sodium channel protein type VIII subunit alpha) (Voltage-gated sodium channel subunit alpha Nav1.6)                                                                                    | Scn8a (Nbna1)                                                                                                | 28                        | 19  | 20  | 11 |     |
| Q9WUJ8      | Origin recognition complex subunit 6                                                                                                                                                                                                | Orc6l (Orc6)                                                                                                 | 59                        | 37  | 13  | 7  |     |
| O88844      | Isocitrate dehydrogenase [NADP] cytoplasmic (IDH) (EC 1.1.1.42) (Cytosolic NADP-isocitrate dehydrogenase) (Oxalosuccinate decarboxylase) (NADP(+)-specific ICDH) (IDP)                                                              | Idh1                                                                                                         | 155                       | 163 | 15  | 8  |     |
| P11103      | Poly [ADP-ribose] polymerase 1 (PARP-1) (EC 2.4.2.30) (ADPRT) (NAD(+) ADP-ribosyltransferase 1) (Poly[ADP-ribose] synthetase 1) (msPARP)                                                                                            | Parp1 (Adprp) (Adprt) (Adprt1)                                                                               | 21                        | 26  | 17  | 9  |     |
| P97351      | 40S ribosomal protein S3a                                                                                                                                                                                                           | Rps3a                                                                                                        | 899                       | 392 | 50  | 26 |     |
| Transferase | P10639                                                                                                                                                                                                                              | Thioredoxin (Trx) (ATL-derived factor) (ADF)                                                                 | Txn (Txn1)                | 169 | 914 | 22 | 42  |
|             | Q3TCT4                                                                                                                                                                                                                              | Ectonucleoside triphosphate diphosphohydrolase 7 (NTPDase 7) (EC 3.6.1.-) (Lysosomal apyrase-like protein 1) | Entpd7 (Kiaa4066) (Lalp1) | 16  | 33  | 42 | 80  |
|             | Q9CQE1                                                                                                                                                                                                                              | Protein NipSnap homolog 3A (NipSnap3A) (NipSnap-related protein)                                             | Nipsnap3a (Nipsnap3b)     | 15  | 25  | 16 | 29  |
|             | P56716                                                                                                                                                                                                                              | Oxygen-regulated protein 1 (Retinitis pigmentosa RP1 protein homolog)                                        | Rp1 (Orp1) (Rp1h)         | 31  | 49  | 58 | 104 |
|             | Q8K2P1                                                                                                                                                                                                                              | Uncharacterized protein C9orf150 homolog                                                                     | D4Bwg0951e                | 21  | 32  | 51 | 91  |

|        |                                                                                                                                                                                     |                                                                                                                                                                                  |     |      |    |    |
|--------|-------------------------------------------------------------------------------------------------------------------------------------------------------------------------------------|----------------------------------------------------------------------------------------------------------------------------------------------------------------------------------|-----|------|----|----|
| Q8BYC6 | Serine/threonine-protein kinase TAO3 (EC 2.7.11.1) (Thousand and one amino acid protein 3)                                                                                          | Taok3                                                                                                                                                                            | 32  | 38   | 9  | 16 |
| Q64674 | Spermidine synthase (SPDSY) (EC 2.5.1.16) (Putrescine aminopropyltransferase)                                                                                                       | Srm                                                                                                                                                                              | 55  | 29   | 4  | 7  |
| P56198 | Cell death activator CIDE-3 (Cell death-inducing DFFA-like effector protein C) (Fat-specific protein FSP27)                                                                         | Cidec (Fsp27)                                                                                                                                                                    | 51  | 39   | 8  | 14 |
| Q8QZR5 | Alanine aminotransferase 1 (ALT1) (EC 2.6.1.2) (Glutamic--pyruvic transaminase 1) (Glutamate pyruvate transaminase 1) (GPT 1) (Glutamic--alanine transaminase 1)                    | Gpt (Gpt1)                                                                                                                                                                       | 25  | 20   | 15 | 26 |
| Q9D009 | Putative octanoyltransferase, mitochondrial (EC 2.3.1.181) (Octanoyl-[acyl-carrier-protein]-protein N-octanoyltransferase) (Lipoyl/octanoyl transferase) (Lipoate-protein ligase B) |                                                                                                                                                                                  | 38  | 42   | 11 | 19 |
| P62806 | Histone H4                                                                                                                                                                          | Hist1h4a;<br>Hist1h4b (H4-53);<br>Hist1h4c (H4-12);<br>Hist1h4d;<br>Hist1h4f;<br>Hist1h4h;<br>Hist1h4i;<br>Hist1h4j;<br>Hist1h4k;<br>Hist1h4m;<br>Hist2h4a (Hist2h4);<br>Hist4h4 | 815 | 1617 | 47 | 78 |

|        |                                                                                                                                                                          |                                  |     |     |    |    |
|--------|--------------------------------------------------------------------------------------------------------------------------------------------------------------------------|----------------------------------|-----|-----|----|----|
| P15532 | Nucleoside diphosphate kinase A (NDP kinase A) (NDK A) (EC 2.7.4.6) (Tumor metastatic process-associated protein) (Metastasis inhibition factor NM23) (NDPK-A) (nm23-M1) | Nme1 (Nm23)                      | 150 | 261 | 8  | 13 |
| P19157 | Glutathione S-transferase P 1 (Gst P1) (EC 2.5.1.18) (GST YF-YF) (GST-piB) (GST class-pi) (Preadipocyte growth factor)                                                   | Gstp1 (Gstpib)                   | 473 | 572 | 10 | 16 |
| Q8BGT5 | Alanine aminotransferase 2 (ALT2) (EC 2.6.1.2) (Glutamic--pyruvic transaminase 2) (Glutamate pyruvate transaminase 2) (GPT 2) (Glutamic--alanine transaminase 2)         | Gpt2 (Aat2)                      | 25  | 20  | 15 | 24 |
| Q61990 | Poly(rC)-binding protein 2 (Alpha-CP2) (Putative heterogeneous nuclear ribonucleoprotein X) (hnRNP X) (CTBP) (CBP)                                                       | Pcbp2 (Cbp) (HnrnpX) (Hnrpx)     | 29  | 194 | 7  | 11 |
| P63158 | High mobility group protein B1 (High mobility group protein 1) (HMG-1)                                                                                                   | Hmgb1 (Hmg-1) (Hmg1)             | 153 | 405 | 25 | 38 |
| Q9CQY5 | Magnesium transporter protein 1 (MagT1) (Implantation-associated protein) (IAP)                                                                                          | Magt1 (Iag2)                     | 26  | 22  | 8  | 12 |
| Q99K85 | Phosphoserine aminotransferase (PSAT) (EC 2.6.1.52) (Phosphohydroxythreonine aminotransferase) (Endometrial progesterone-induced protein) (EPIP)                         | Psat1 (Psa) (Psat)               | 162 | 541 | 16 | 24 |
| Q9QZ39 | Alpha-N-acetylgalactosaminide alpha-2,6-sialyltransferase 1 (EC 2.4.99.3) (GalNAc alpha-2,6-sialyltransferase I) (ST6GalNAc I) (Sialyltransferase 7A)                    | St6galnac1 (Siat7a)              | 27  | 18  | 11 | 16 |
| P60335 | Poly(rC)-binding protein 1 (Alpha-CP1) (hnRNP-E1)                                                                                                                        | Pcbp1                            | 56  | 350 | 9  | 13 |
| P12813 | Nuclear receptor subfamily 4 group A member 1 (Orphan nuclear receptor HMR) (Nuclear hormone receptor NUR/77) (N10 nuclear protein)                                      | Nr4a1 (Gfrp) (Hmr) (N10) (Nur77) | 61  | 31  | 7  | 10 |



|        |                                                                                                                                                                                                                                                                                        |                                         |     |     |    |    |
|--------|----------------------------------------------------------------------------------------------------------------------------------------------------------------------------------------------------------------------------------------------------------------------------------------|-----------------------------------------|-----|-----|----|----|
| Q99M73 | Keratin, type II cuticular Hb4 (Type II hair keratin Hb4) (Keratin-84) (K84) (65 kDa type II keratin)                                                                                                                                                                                  | Krt84 (Krt2-16) (Krt84) (Krt84) (Krt84) | 36  | 74  | 14 | 19 |
| P70338 | Zinc finger protein Gfi-1 (Growth factor independent protein 1)                                                                                                                                                                                                                        | Gfi1 (Gfi-1)                            | 45  | 39  | 17 | 23 |
| Q6P8J2 | Diamine acetyltransferase 2 (EC 2.3.1.57) (Spermidine/spermine N(1)-acetyltransferase 2) (Polyamine N-acetyltransferase 2)                                                                                                                                                             | Sat2 (Ssat2)                            | 33  | 23  | 6  | 8  |
| P47867 | Secretogranin-3 (Secretogranin III) (SgIII)                                                                                                                                                                                                                                            | Scg3                                    | 21  | 26  | 6  | 8  |
| Q9WTX2 | Interferon-inducible double stranded RNA-dependent protein kinase activator A (Protein kinase, interferon-inducible double stranded RNA-dependent activator) (Protein activator of the interferon-induced protein kinase) (PKR-associated protein X) (PKR-associating protein X) (RAX) | Prkra (Rax)                             | 28  | 39  | 9  | 12 |
| Q9Z277 | Bromodomain adjacent to zinc finger domain protein 1B (Williams-Beuren syndrome chromosomal region 9 protein homolog) (WBRS9)                                                                                                                                                          | Baz1b (Wbscr9)                          | 43  | 17  | 26 | 34 |
| Q7TQ07 | DNA polymerase nu (EC 2.7.7.7)                                                                                                                                                                                                                                                         | Poln                                    | 20  | 39  | 14 | 18 |
| O70456 | 14-3-3 protein sigma (Stratifin)                                                                                                                                                                                                                                                       | Sfn (Mkrn3)                             | 573 | 666 | 56 | 71 |
| Q923B1 | Lariat debranching enzyme (EC 3.1.-.-)                                                                                                                                                                                                                                                 | Dbr1                                    | 28  | 29  | 15 | 19 |
| Q60716 | Prolyl 4-hydroxylase subunit alpha-2 (EC 1.14.11.2) (4-PH alpha-2) (Procollagen-proline,2-oxoglutarate-4-dioxygenase subunit alpha-2)                                                                                                                                                  | P4ha2                                   | 22  | 27  | 8  | 10 |
| P59270 | Galactosylgalactosylxylosylprotein 3-beta-glucuronosyltransferase 2 (EC 2.4.1.135) (Beta-1,3-glucuronyltransferase 2) (UDP-glucuronosyltransferase-S) (Glucuronosyltransferase-S) (GlcAT-S) (GlcAT-D)                                                                                  | B3gat2 (Glcats)                         | 29  | 16  | 9  | 11 |

|        |                                                                                                                                                                                                                                                                                                                    |                                  |     |     |    |    |
|--------|--------------------------------------------------------------------------------------------------------------------------------------------------------------------------------------------------------------------------------------------------------------------------------------------------------------------|----------------------------------|-----|-----|----|----|
| Q9R1P0 | Proteasome subunit alpha type-4 (EC 3.4.25.1) (Proteasome component C9) (Macropain subunit C9) (Multicatalytic endopeptidase complex subunit C9) (Proteasome subunit L)                                                                                                                                            | Psma4                            | 29  | 151 | 14 | 17 |
| O08648 | Mitogen-activated protein kinase kinase kinase 4 (EC 2.7.11.25) (MAPK/ERK kinase kinase 4) (MEK kinase 4) (MEKK 4)                                                                                                                                                                                                 | Map3k4 (Mekk4)                   | 37  | 16  | 19 | 23 |
| Q9EQC4 | Elongation of very long chain fatty acids protein 4                                                                                                                                                                                                                                                                | Elov14                           | 25  | 18  | 5  | 6  |
| O35618 | Protein Mdm4 (p53-binding protein Mdm4) (Mdm2-like p53-binding protein) (Protein Mdmx) (Double minute 4 protein)                                                                                                                                                                                                   | Mdm4 (Mdmx)                      | 17  | 29  | 5  | 6  |
| P54227 | Stathmin (Phosphoprotein p19) (pp19) (Leukemia-associated phosphoprotein p18) (Oncoprotein 18) (Op18) (pp17) (Prosolin) (Metablastin) (Protein Pr22) (Leukemia-associated gene protein)                                                                                                                            | Stmn1 (Lag) (Lap18) (Pr22)       | 121 | 120 | 10 | 12 |
| Q8BFY9 | Transportin-1 (Importin beta-2) (Karyopherin beta-2)                                                                                                                                                                                                                                                               | Tnpo1 (Kpnb2)                    | 54  | 43  | 10 | 12 |
| Q80XA6 | RalBP1-associated Eps domain-containing protein 2 (RalBP1-interacting protein 2) (Partner of RalBP1)                                                                                                                                                                                                               | Reps2 (Pob1)                     | 33  | 31  | 6  | 7  |
| P55821 | Stathmin-2 (Superior cervical ganglion-10 protein) (Protein SCG10)                                                                                                                                                                                                                                                 | Stmn2 (Scg10) (Scgn10) (Stmb2)   | 74  | 73  | 6  | 7  |
| Q9QWY8 | 130 kDa phosphatidylinositol 4,5-biphosphate-dependent ARF1 GTPase-activating protein (PIP2-dependent ARF1 GAP) (ADP-ribosylation factor-directed GTPase-activating protein 1) (ARF GTPase-activating protein 1) (Development and differentiation-enhancing factor 1) (Differentiation-enhancing factor 1) (DEF-1) | Ddef1 (Asap1) (Kiaa1249) (Shag1) | 26  | 23  | 14 | 16 |

|        |                                                                                                                                                                                            |                                             |      |      |     |     |
|--------|--------------------------------------------------------------------------------------------------------------------------------------------------------------------------------------------|---------------------------------------------|------|------|-----|-----|
| P97820 | Mitogen-activated protein kinase kinase kinase kinase 4 (EC 2.7.11.1) (MAPK/ERK kinase kinase kinase 4) (MEK kinase kinase 4) (MEKKK 4) (HPK/GCK-like kinase HGK) (Nck-interacting kinase) | Map4k4 (Nik)                                | 65   | 54   | 15  | 17  |
| P62270 | 40S ribosomal protein S18 (Ke-3) (Ke3)                                                                                                                                                     | Rps18                                       | 210  | 209  | 15  | 17  |
| P62908 | 40S ribosomal protein S3                                                                                                                                                                   | Rps3                                        | 778  | 762  | 39  | 44  |
| Q93092 | Transaldolase (EC 2.2.1.2)                                                                                                                                                                 | Taldo1 (Tal)<br>(Taldo)                     | 20   | 93   | 10  | 11  |
| Q3THS6 | S-adenosylmethionine synthetase isoform type 2 (AdoMet synthetase 2) (EC 2.5.1.6) (Methionine adenosyltransferase 2)                                                                       | Mat2a                                       | 26   | 42   | 11  | 12  |
| P07901 | Heat shock protein HSP 90-alpha (HSP 86) (Tumor-specific transplantation 86 kDa antigen) (TSTA)                                                                                            | Hsp90aa1<br>(Hsp86)<br>(Hsp86-1)<br>(Hspca) | 1529 | 2324 | 134 | 146 |
| P11984 | T-complex protein 1 subunit alpha A (TCP-1-alpha) (CCT-alpha) (Tailless complex polypeptide 1A) (TCP-1-A)                                                                                  | Cct1 (Ccta)<br>(Tcp1)                       | 29   | 66   | 14  | 15  |
| Q9DBR7 | Protein phosphatase 1 regulatory subunit 12A (Myosin phosphatase-targeting subunit 1) (Myosin phosphatase target subunit 1)                                                                | Ppp1r12a<br>(Mypt1)                         | 88   | 67   | 18  | 19  |
| Q62504 | Msx2-interacting protein (SPEN homolog) (SMART/HDAC1-associated repressor protein)                                                                                                         | Spen<br>(Kiaa0929)<br>(Mint) (Sharp)        | 27   | 18   | 72  | 75  |
| O88693 | Ceramide glucosyltransferase (EC 2.4.1.80) (Glucosylceramide synthase) (GCS) (UDP-glucose:N-acylsphingosine D-glucosyltransferase) (UDP-glucose ceramide glucosyltransferase) (GLCT-1)     | Ugcg                                        | 37   | 50   | 7   | 7   |
| Q9R190 | Metastasis-associated protein MTA2 (Metastasis-associated 1-like 1)                                                                                                                        | Mta2 (Mta111)                               | 27   | 26   | 9   | 9   |
| Q61092 | Laminin subunit gamma-2 (Laminin 5 gamma 2 subunit) (Kalinin/nicein/epiligrin 100 kDa subunit) (Laminin B2t chain)                                                                         | Lamc2                                       | 33   | 29   | 13  | 13  |

|        |                                                                                                                                                                                                              |                                        |     |      |     |     |
|--------|--------------------------------------------------------------------------------------------------------------------------------------------------------------------------------------------------------------|----------------------------------------|-----|------|-----|-----|
| Q9QYX7 | Protein piccolo (Aczonin) (Multidomain presynaptic cytomatrix protein) (Brain-derived HLMN protein)                                                                                                          | Pclo (Acz)                             | 101 | 117  | 114 | 114 |
| Q91YE5 | Bromodomain adjacent to zinc finger domain protein 2A (Transcription termination factor I-interacting protein 5) (TTF-I-interacting protein 5) (Tip5)                                                        | Baz2a (Tip5)                           | 36  | 15   | 56  | 55  |
| Q8R4B8 | NACHT, LRR and PYD domains-containing protein 3 (Cold autoinflammatory syndrome 1 protein homolog) (Cryopyrin) (PYRIN-containing APAF1-like protein 1) (Mast cell maturation-associated-inducible protein 1) | Nlrp3 (Cias1) (Mmig1) (Nalp3) (Pypaf1) | 30  | 20   | 24  | 23  |
| Q91V92 | ATP-citrate synthase (EC 2.3.3.8) (ATP-citrate (pro-S)-lyase) (Citrate cleavage enzyme)                                                                                                                      | Acly                                   | 349 | 488  | 45  | 43  |
| Q9CPR4 | 60S ribosomal protein L17                                                                                                                                                                                    | Rpl17                                  | 187 | 135  | 15  | 14  |
| P03995 | Glial fibrillary acidic protein (GFAP)                                                                                                                                                                       | Gfap                                   | 63  | 90   | 22  | 20  |
| Q8R4U7 | Leucine zipper protein 1 (Leucine zipper motif-containing protein)                                                                                                                                           | Luzp1 (Luzp)                           | 31  | 32   | 22  | 20  |
| Q8CGC7 | Bifunctional aminoacyl-tRNA synthetase [Includes: Glutamyl-tRNA synthetase (EC 6.1.1.17) (Glutamate--tRNA ligase); Prolyl-tRNA synthetase (EC 6.1.1.15) (Proline--tRNA ligase)]                              | Eprs (Qprs)                            | 130 | 102  | 32  | 29  |
| Q9QXA7 | Tripartite motif-containing protein 44 (Protein DIPB) (Protein Mc7)                                                                                                                                          | Trim44 (Dipb)                          | 28  | 23   | 18  | 16  |
| Q68FD5 | Clathrin heavy chain 1                                                                                                                                                                                       | Cltc                                   | 944 | 884  | 88  | 78  |
| Q02053 | Ubiquitin-like modifier-activating enzyme 1 (Ubiquitin-activating enzyme E1) (Ubiquitin-like modifier-activating enzyme 1 X) (Ubiquitin-activating enzyme E1 X)                                              | Uba1 (Sbx) (Ube1) (Ube1ax) (Ube1x)     | 660 | 1086 | 63  | 55  |
| Q9JJK8 | Serine/threonine-protein kinase ATR (EC 2.7.11.1) (Ataxia telangiectasia and Rad3-related protein)                                                                                                           | Atr                                    | 20  | 25   | 72  | 62  |

|        |                                                                                                                                                                                                                                                                                                                                                                                                                                                                         |                       |      |      |     |     |
|--------|-------------------------------------------------------------------------------------------------------------------------------------------------------------------------------------------------------------------------------------------------------------------------------------------------------------------------------------------------------------------------------------------------------------------------------------------------------------------------|-----------------------|------|------|-----|-----|
| Q9JM52 | Misshapen-like kinase 1 (EC 2.7.11.1)<br>(Mitogen-activated protein kinase kinase kinase 6) (MAPK/ERK kinase kinase 6) (MEK kinase kinase 6) (MEKKK 6) (Misshapen/NIK-related kinase) (GCK family kinase MiNK)                                                                                                                                                                                                                                                          | Mink1 (Map4k6) (Mink) | 18   | 54   | 13  | 11  |
| P46664 | Adenylosuccinate synthetase isozyme 2 (AMPSase 2) (AdSS 2) (EC 6.3.4.4)<br>(Adenylosuccinate synthetase, non-muscle isozyme) (Adenylosuccinate synthetase, acidic isozyme) (IMP--aspartate ligase 2)                                                                                                                                                                                                                                                                    | Adss (Adss2)          | 36   | 66   | 12  | 10  |
| P11983 | T-complex protein 1 subunit alpha B (TCP-1-alpha) (CCT-alpha) (Tailless complex polypeptide 1B) (TCP-1-B)                                                                                                                                                                                                                                                                                                                                                               | Cct1 (Ccta) (Tcp1)    | 29   | 66   | 18  | 15  |
| P19096 | Fatty acid synthase (EC 2.3.1.85) [Includes: [Acyl-carrier-protein] S-acetyltransferase (EC 2.3.1.38); [Acyl-carrier-protein] S-malonyltransferase (EC 2.3.1.39); 3-oxoacyl-[acyl-carrier-protein] synthase (EC 2.3.1.41); 3-oxoacyl-[acyl-carrier-protein] reductase (EC 1.1.1.100); 3-hydroxypalmitoyl-[acyl-carrier-protein] dehydratase (EC 4.2.1.61); Enoyl-[acyl-carrier-protein] reductase (EC 1.3.1.10); Oleoyl [acyl-carrier-protein] hydrolase (EC 3.1.2.14)] | Fasn                  | 1869 | 1524 | 163 | 135 |
| P42227 | Signal transducer and activator of transcription 3 (Acute-phase response factor)                                                                                                                                                                                                                                                                                                                                                                                        | Stat3 (Aprf)          | 16   | 28   | 33  | 27  |
| Q91ZU6 | Bullous pemphigoid antigen 1, isoforms 1/2/3/4 (BPA) (Hemidesmosomal plaque protein) (Dystonia musculorum protein) (Dystonin)                                                                                                                                                                                                                                                                                                                                           | Dst (Bpag1)           | 78   | 38   | 126 | 100 |

|        |                                                                                                                                                                                                                                        |                               |     |     |    |    |
|--------|----------------------------------------------------------------------------------------------------------------------------------------------------------------------------------------------------------------------------------------|-------------------------------|-----|-----|----|----|
| Q80UN9 | tRNA isopentenyltransferase, mitochondrial (IPTase) (EC 2.5.1.8) (Isopentenyl-diphosphate:tRNA isopentenyltransferase) (IPP transferase) (IPPT)                                                                                        | Trit1 (lpt)                   | 31  | 24  | 19 | 15 |
| P31254 | Ubiquitin-like modifier-activating enzyme 1 Y (Ubiquitin-activating enzyme E1 Y) (Ubiquitin-activating enzyme E1)                                                                                                                      | Ube1ay (Sby) (Ube1y) (Ube1y1) | 161 | 77  | 22 | 17 |
| P62702 | 40S ribosomal protein S4, X isoform                                                                                                                                                                                                    | Rps4x (Rps4)                  | 402 | 304 | 30 | 23 |
| P47856 | Glucosamine--fructose-6-phosphate aminotransferase [isomerizing] 1 (EC 2.6.1.16) (Glutamine:fructose 6 phosphate amidotransferase 1) (GFAT 1) (GFAT1) (D-fructose-6-phosphate amidotransferase 1) (Hexosephosphate aminotransferase 1) | Gfpt1 (Gfpt)                  | 17  | 29  | 17 | 13 |
| P58043 | Sestrin-2                                                                                                                                                                                                                              | Sesn2 (Sest2)                 | 21  | 34  | 4  | 3  |
| Q9DBG5 | Mannose-6-phosphate receptor-binding protein 1 (Cargo selection protein TIP47)                                                                                                                                                         | M6prbp1 (Tip47)               | 25  | 22  | 8  | 6  |
| Q8K045 | Serine/threonine-protein kinase N3 (EC 2.7.11.13) (Protein kinase PKN-beta) (Protein-kinase C-related kinase 3)                                                                                                                        | Pkn3 (Pknbeta)                | 130 | 126 | 36 | 27 |
| P62264 | 40S ribosomal protein S14                                                                                                                                                                                                              | Rps14                         | 163 | 166 | 15 | 11 |
| Q9CQ65 | S-methyl-5'-thioadenosine phosphorylase (EC 2.4.2.28) (5'-methylthioadenosine phosphorylase) (MTA phosphorylase) (MTAPase)                                                                                                             | Mtap                          | 48  | 36  | 7  | 5  |
| Q03172 | Zinc finger protein 40 (Transcription factor alphaA-CRYBP1) (Alpha A-crystallin-binding protein I) (Alpha A-CRYBP1)                                                                                                                    | Hivep1 (Cryabp1) (Znf40)      | 25  | 24  | 21 | 15 |
| Q99LD8 | N(G),N(G)-dimethylarginine dimethylaminohydrolase 2 (Dimethylarginine dimethylaminohydrolase 2) (DDAH-2) (EC 3.5.3.18) (DDAHII) (Dimethylargininase-2)                                                                                 | Ddah2                         | 103 | 92  | 9  | 6  |

|        |                                                                                                                                                                                                                                                                                                        |                        |      |     |     |    |
|--------|--------------------------------------------------------------------------------------------------------------------------------------------------------------------------------------------------------------------------------------------------------------------------------------------------------|------------------------|------|-----|-----|----|
| Q8CAY6 | Acetyl-CoA acetyltransferase, cytosolic (EC 2.3.1.9) (Cytosolic acetoacetyl-CoA thiolase)                                                                                                                                                                                                              | Acat2                  | 65   | 18  | 9   | 6  |
| P42932 | T-complex protein 1 subunit theta (TCP-1-theta) (CCT-theta)                                                                                                                                                                                                                                            | Cct8 (Cctq)            | 197  | 57  | 23  | 15 |
| P40142 | Transketolase (TK) (EC 2.2.1.1) (P68)                                                                                                                                                                                                                                                                  | Tkt                    | 562  | 250 | 117 | 75 |
| Q61983 | Sodium-dependent phosphate transport protein 1 (Sodium/phosphate cotransporter 1) (Na(+)/PI cotransporter 1) (Solute carrier family 17 member 1) (Renal sodium-dependent phosphate transport protein 1) (Renal sodium-phosphate transport protein 1) (Renal Na(+)-dependent phosphate cotransporter 1) | Slc17a1 (Npt1)         | 31   | 33  | 8   | 5  |
| P63042 | Stathmin-4 (Stathmin-like protein B3) (RB3)                                                                                                                                                                                                                                                            | Stmn4                  | 74   | 53  | 8   | 5  |
| Q68ED2 | Metabotropic glutamate receptor 7 (mGluR7)                                                                                                                                                                                                                                                             | Grm7 (Gprc1g) (Mglur7) | 37   | 33  | 13  | 8  |
| Q9D1R9 | 60S ribosomal protein L34                                                                                                                                                                                                                                                                              | Rpl34                  | 34   | 32  | 10  | 6  |
| Q9QWK5 | Baculoviral IAP repeat-containing protein 1a (Neuronal apoptosis inhibitory protein 1)                                                                                                                                                                                                                 | Naip1 (Birc1a) (Naip)  | 21   | 28  | 20  | 12 |
| Q8R4K8 | Pappalysin-1 (EC 3.4.24.79) (Pregnancy-associated plasma protein A) (PAPP-A) (Insulin-like growth factor-dependent IGF-binding protein 4 protease) (IGF-dependent IGFBP-4 protease) (IGFBP-4ase)                                                                                                       | Pappa                  | 41   | 43  | 25  | 15 |
| P09041 | Phosphoglycerate kinase 2 (EC 2.7.2.3) (Phosphoglycerate kinase, testis specific)                                                                                                                                                                                                                      | Pgk2 (Pgk-2)           | 162  | 73  | 17  | 10 |
| P63017 | Heat shock cognate 71 kDa protein (Heat shock 70 kDa protein 8)                                                                                                                                                                                                                                        | Hspa8 (Hsc70) (Hsc73)  | 1719 | 959 | 119 | 70 |
| P05532 | Mast/stem cell growth factor receptor (SCFR) (EC 2.7.10.1) (Proto-oncogene tyrosine-protein kinase Kit) (c-kit) (CD antigen CD117)                                                                                                                                                                     | Kit (Sl)               | 16   | 35  | 12  | 7  |

|                                 |        |                                                                                                                                                      |                                |      |      |    |     |
|---------------------------------|--------|------------------------------------------------------------------------------------------------------------------------------------------------------|--------------------------------|------|------|----|-----|
|                                 | P62900 | 60S ribosomal protein L31                                                                                                                            | Rpl31                          | 124  | 62   | 12 | 7   |
|                                 | P53762 | Aryl hydrocarbon receptor nuclear translocator (ARNT protein) (Dioxin receptor, nuclear translocator) (Hypoxia-inducible factor 1 beta) (HIF-1 beta) | Arnt                           | 25   | 22   | 7  | 4   |
|                                 | Q9QUK4 | Baculoviral IAP repeat-containing protein 1b (Neuronal apoptosis inhibitory protein 2)                                                               | Naip2 (Birc1b) (Naip-rs6)      | 21   | 28   | 14 | 8   |
|                                 | P17918 | Proliferating cell nuclear antigen (PCNA) (Cyclin)                                                                                                   | Pcna                           | 273  | 207  | 20 | 11  |
|                                 | P11103 | Poly [ADP-ribose] polymerase 1 (PARP-1) (EC 2.4.2.30) (ADPRT) (NAD(+) ADP-ribosyltransferase 1) (Poly[ADP-ribose] synthetase 1) (msPARP)             | Parp1 (Adprp) (Adprt) (Adprt1) | 21   | 26   | 17 | 9   |
|                                 | P10649 | Glutathione S-transferase Mu 1 (EC 2.5.1.18) (GST class-mu 1) (Glutathione S-transferase GT8.7) (pmGT10) (GST 1-1)                                   | Gstm1                          | 1081 | 522  | 61 | 31  |
| Non-motor actin binding protein | P04104 | Keratin, type II cytoskeletal 1 (Cytokeratin-1) (CK-1) (Keratin-1) (K1) (67 kDa cyto keratin) (Krt1 protein)                                         | Krt1 (Krt2-1)                  | 87   | 124  | 14 | 27  |
|                                 | Q3TCT4 | Ectonucleoside triphosphate diphosphohydrolase 7 (NTPDase 7) (EC 3.6.1.1) (Lysosomal apyrase-like protein 1)                                         | Entpd7 (Kiaa4066) (Lalp1)      | 16   | 33   | 42 | 80  |
|                                 | Q8BTM8 | Filamin-A (Alpha-filamin) (Filamin-1) (Endothelial actin-binding protein) (Actin-binding protein 280) (ABP-280) (Non-muscle filamin)                 | Flna (Fln) (Fln1)              | 254  | 1031 | 46 | 86  |
|                                 | Q8R3C6 | Probable RNA-binding protein 19 (RNA-binding motif protein 19)                                                                                       | Rbm19                          | 26   | 32   | 11 | 20  |
|                                 | Q99N50 | Synaptotagmin-like protein 2 (Exophilin-4)                                                                                                           | Syt12 (Slp2)                   | 26   | 77   | 10 | 18  |
|                                 | P03987 | Ig gamma-3 chain C region                                                                                                                            |                                | 30   | 34   | 4  | 7   |
|                                 | P62962 | Profilin-1 (Profilin I)                                                                                                                              | Pfn1                           | 30   | 93   | 4  | 7   |
|                                 | P18760 | Cofilin-1 (Cofilin, non-muscle isoform)                                                                                                              | Cfl1                           | 959  | 2552 | 70 | 122 |
|                                 | Q9Z309 | Calcium and integrin-binding family member 2 (Kinase-interacting protein 2) (KIP 2)                                                                  | Cib2 (Kip2)                    | 31   | 17   | 3  | 5   |
|                                 | Q64475 | Histone H2B type 1-B (h2B-143)                                                                                                                       | Hist1h2bb                      | 436  | 999  | 46 | 75  |



|        |                                                                                                                                                                   |                    |     |     |    |    |
|--------|-------------------------------------------------------------------------------------------------------------------------------------------------------------------|--------------------|-----|-----|----|----|
| Q8VDM4 | 26S proteasome non-ATPase regulatory subunit 2 (26S proteasome regulatory subunit RPN1) (26S proteasome regulatory subunit S2) (26S proteasome subunit p97)       | Psm2               | 113 | 157 | 18 | 29 |
| Q9D8W5 | 26S proteasome non-ATPase regulatory subunit 12 (26S proteasome regulatory subunit p55)                                                                           | Psm12              | 67  | 78  | 7  | 11 |
| O55142 | 60S ribosomal protein L35a                                                                                                                                        | Rpl35a             | 24  | 50  | 4  | 6  |
| Q9D1H6 | Protein HRPAP20 (Hormone-regulated proliferation-associated protein of 20 kDa homolog)                                                                            | Hrpap20            | 70  | 38  | 6  | 9  |
| P16045 | Galectin-1 (Lectin galactoside-binding soluble 1) (Beta-galactoside-binding lectin L-14-I) (Lactose-binding lectin 1) (S-Lac lectin 1) (Galaptin) (14 kDa lectin) | Lgals1 (Gbp)       | 79  | 85  | 6  | 9  |
| Q8VHX6 | Filamin-C (Gamma-filamin) (Filamin-2) (FLN-C) (Actin-binding-like protein) (ABP-L) (ABP-280-like protein)                                                         | Fln1 (Abpl) (Fln2) | 33  | 115 | 18 | 25 |
| Q61937 | Nucleophosmin (NPM) (Nucleolar phosphoprotein B23) (Numatrin) (Nucleolar protein NO38)                                                                            | Npm1               | 92  | 66  | 11 | 15 |
| O08807 | Peroxiredoxin-4 (EC 1.11.1.15) (Prx-IV) (Thioredoxin peroxidase AO372) (Thioredoxin-independent peroxide reductase A0372) (Antioxidant enzyme AOE372)             | Prdx4              | 273 | 421 | 25 | 34 |
| P70338 | Zinc finger protein Gfi-1 (Growth factor independent protein 1)                                                                                                   | Gfi1 (Gfi-1)       | 45  | 39  | 17 | 23 |
| Q6P8J2 | Diamine acetyltransferase 2 (EC 2.3.1.57) (Spermidine/spermine N(1)-acetyltransferase 2) (Polyamine N-acetyltransferase 2)                                        | Sat2 (Ssat2)       | 33  | 23  | 6  | 8  |
| Q640P2 | Angiopoietin-related protein 1 (Angiopoietin-like 1)                                                                                                              | Angptl1            | 55  | 41  | 21 | 28 |

|        |                                                                                                                                       |                       |      |      |     |     |
|--------|---------------------------------------------------------------------------------------------------------------------------------------|-----------------------|------|------|-----|-----|
| P70296 | Phosphatidylethanolamine-binding protein 1 (PEBP-1) (HCNPPp) [Cleaved into: Hippocampal cholinergic neurostimulating peptide (HCNP)]  | Pebp1 (Pbp) (Pebp)    | 532  | 730  | 25  | 33  |
| Q9Z277 | Bromodomain adjacent to zinc finger domain protein 1B (Williams-Beuren syndrome chromosomal region 9 protein homolog) (WBRS9)         | Baz1b (Wbscr9)        | 43   | 17   | 26  | 34  |
| Q8CIM1 | Leucine-rich repeat-containing protein 45                                                                                             | Lrrc45                | 33   | 71   | 27  | 35  |
| P47753 | F-actin-capping protein subunit alpha-1 (CapZ alpha-1)                                                                                | Capza1 (Cappa1)       | 60   | 33   | 7   | 9   |
| Q80X90 | Filamin-B (FLN-B) (Beta-filamin) (Actin-binding like protein) (ABP-280-like protein)                                                  | Flnb                  | 63   | 279  | 32  | 41  |
| P20152 | Vimentin                                                                                                                              | Vim                   | 1749 | 2397 | 125 | 157 |
| O09010 | Beta-1,3-N-acetylglucosaminyltransferase lunatic fringe (EC 2.4.1.222) (O-fucosylpeptide 3-beta-N-acetylglucosaminyltransferase)      | Lfng                  | 33   | 33   | 8   | 10  |
| Q60716 | Prolyl 4-hydroxylase subunit alpha-2 (EC 1.14.11.2) (4-PH alpha-2) (Procollagen-proline,2-oxoglutarate-4-dioxygenase subunit alpha-2) | P4ha2                 | 22   | 27   | 8   | 10  |
| Q811J3 | Iron-responsive element-binding protein 2 (IRE BP 2) (Iron regulatory protein 2) (IRP2)                                               | Ireb2 (Irp2)          | 69   | 119  | 142 | 176 |
| Q61316 | Heat shock 70 kDa protein 4 (Heat shock 70-related protein APG-2)                                                                     | Hspa4 (Apg2) (Hsp110) | 379  | 792  | 42  | 52  |
| Q8R2X8 | Golgin-45 (Basic leucine zipper nuclear factor 1)                                                                                     | Blzf1                 | 28   | 22   | 13  | 16  |
| P51880 | Fatty acid-binding protein, brain (B-FABP) (Fatty acid-binding protein 7) (Brain lipid-binding protein) (BLBP)                        | Fabp7 (Blbp)          | 933  | 856  | 31  | 38  |
| P47754 | F-actin-capping protein subunit alpha-2 (CapZ alpha-2)                                                                                | Capza2 (Cappa2)       | 60   | 33   | 5   | 6   |
| Q9JKF1 | Ras GTPase-activating-like protein IQGAP1                                                                                             | Iqgap1                | 19   | 81   | 21  | 25  |

|        |                                                                                                                                                                                                                       |                     |     |     |     |     |
|--------|-----------------------------------------------------------------------------------------------------------------------------------------------------------------------------------------------------------------------|---------------------|-----|-----|-----|-----|
| O08810 | 116 kDa U5 small nuclear ribonucleoprotein component (U5 snRNP-specific protein, 116 kDa) (U5-116 kDa) (Elongation factor Tu GTP-binding domain-containing protein 2)                                                 | Eftud2 (Snrp116)    | 80  | 68  | 21  | 25  |
| Q9WUM4 | Coronin-1C (Coronin-3)                                                                                                                                                                                                | Coro1c              | 42  | 28  | 18  | 21  |
| Q5SPW0 | Vacuolar protein sorting-associated protein 54 (Tumor antigen SLP-8p homolog)                                                                                                                                         | Vps54               | 36  | 28  | 13  | 15  |
| Q9JKP5 | Muscleblind-like protein 1 (Triplet-expansion RNA-binding protein)                                                                                                                                                    | Mbnl1 (Exp) (Mbnl)  | 45  | 63  | 244 | 281 |
| Q62418 | Drebrin-like protein (SH3 domain-containing protein 7) (Actin-binding protein 1)                                                                                                                                      | Dbnl (Abp1) (Sh3p7) | 24  | 39  | 7   | 8   |
| Q9Z2K1 | Keratin, type I cytoskeletal 16 (Cytokeratin-16) (CK-16) (Keratin-16) (K16)                                                                                                                                           | Krt16 (Krt1-16)     | 37  | 37  | 7   | 8   |
| Q6A4J8 | Ubiquitin carboxyl-terminal hydrolase 7 (EC 3.1.2.15) (Ubiquitin thioesterase 7) (Ubiquitin-specific-processing protease 7) (Deubiquitinating enzyme 7) (Herpesvirus-associated ubiquitin-specific protease) (mHAUSP) | Usp7 (Hausp)        | 27  | 18  | 14  | 16  |
| P58660 | Caspase recruitment domain-containing protein 10 (Bcl10-interacting MAGUK protein 1) (Bimp1)                                                                                                                          | Card10 (Bimp1)      | 33  | 23  | 15  | 17  |
| P62270 | 40S ribosomal protein S18 (Ke-3) (Ke3)                                                                                                                                                                                | Rps18               | 210 | 209 | 15  | 17  |
| Q9D8N0 | Elongation factor 1-gamma (EF-1-gamma) (eEF-1B gamma)                                                                                                                                                                 | Eef1g               | 31  | 85  | 11  | 12  |
| Q99KK9 | Probable histidyl-tRNA synthetase, mitochondrial (EC 6.1.1.21) (Histidine--tRNA ligase) (HisRS) (Histidine--tRNA ligase-like)                                                                                         | Hars2 (Harsl)       | 20  | 41  | 22  | 24  |
| Q6P9Z1 | SWI/SNF-related matrix-associated actin-dependent regulator of chromatin subfamily D member 3 (60 kDa BRG-1/Brm-associated factor subunit C) (BRG1-associated factor 60C) (mBAF60c)                                   | Smarcd3 (Baf60c)    | 29  | 19  | 46  | 50  |

|        |                                                                                                                                                                                                                                                                                                                                        |                                                   |      |      |    |    |
|--------|----------------------------------------------------------------------------------------------------------------------------------------------------------------------------------------------------------------------------------------------------------------------------------------------------------------------------------------|---------------------------------------------------|------|------|----|----|
| P38647 | Stress-70 protein, mitochondrial (75 kDa glucose-regulated protein) (GRP 75) (Heat shock 70 kDa protein 9) (Peptide-binding protein 74) (PBP74) (P66 MOT) (Mortalin)                                                                                                                                                                   | Hspa9 (Grp75) (Hsp74) (Hspa9a)                    | 33   | 33   | 12 | 13 |
| P70398 | Probable ubiquitin carboxyl-terminal hydrolase FAF-X (EC 3.1.2.15) (Ubiquitin thioesterase FAF-X) (Ubiquitin-specific-processing protease FAF-X) (Deubiquitinating enzyme FAF-X) (Fat facets protein-related, X-linked) (Ubiquitin-specific protease 9, X chromosome) (Ubiquitin carboxyl-terminal hydrolase FAM) (Fat facets homolog) | Usp9x (Faf1) (Fam)                                | 42   | 28   | 57 | 61 |
| P16858 | Glyceraldehyde-3-phosphate dehydrogenase (GAPDH) (EC 1.2.1.12)                                                                                                                                                                                                                                                                         | Gapdh (Gapd)                                      | 1514 | 1781 | 84 | 89 |
| Q9DBR7 | Protein phosphatase 1 regulatory subunit 12A (Myosin phosphatase-targeting subunit 1) (Myosin phosphatase target subunit 1)                                                                                                                                                                                                            | Ppp1r12a (Mypt1)                                  | 88   | 67   | 18 | 19 |
| P16546 | Spectrin alpha chain, brain (Spectrin, non-erythroid alpha chain) (Alpha-II spectrin) (Fodrin alpha chain)                                                                                                                                                                                                                             | Sptan1 (Spna2) (Spta2)                            | 68   | 86   | 66 | 69 |
| Q60865 | Caprin-1 (Cytoplasmic activation- and proliferation-associated protein 1) (GPI-anchored membrane protein 1) (GPI-anchored protein p137) (p137GPI) (Membrane component chromosome 11 surface marker 1)                                                                                                                                  | Caprin1 (Gpiap) (Gpiap1) (Gpip137) (M11s1) (G5E5) | 20   | 26   | 5  | 5  |
| Q8VCZ3 | THAP domain-containing protein 7                                                                                                                                                                                                                                                                                                       | Thap7                                             | 26   | 18   | 6  | 6  |
| Q61781 | Keratin, type I cytoskeletal 14 (Cytokeratin-14) (CK-14) (Keratin-14) (K14)                                                                                                                                                                                                                                                            | Krt14 (Krt1-14)                                   | 38   | 37   | 10 | 10 |
| O54951 | Semaphorin-6B (Semaphorin VIB) (Sema VIB) (Semaphorin-N) (Sema N)                                                                                                                                                                                                                                                                      | Sema6b (Seman)                                    | 34   | 25   | 10 | 10 |
| Q8BSS9 | Liprin-alpha-2 (Protein tyrosine phosphatase receptor type f polypeptide-interacting protein alpha-2) (PTPRF-interacting protein alpha-2)                                                                                                                                                                                              | Ppfia2                                            | 36   | 21   | 22 | 22 |

|        |                                                                                                                                                       |                                       |     |     |    |    |
|--------|-------------------------------------------------------------------------------------------------------------------------------------------------------|---------------------------------------|-----|-----|----|----|
| Q62261 | Spectrin beta chain, brain 1 (Spectrin, non-erythroid beta chain 1) (Beta-II spectrin) (Fodrin beta chain) (Embryonic liver fodrin)                   | Sptbn1 (Elf) (Spnb-2) (Spnb2) (Sptb2) | 56  | 54  | 48 | 48 |
| Q91YE5 | Bromodomain adjacent to zinc finger domain protein 2A (Transcription termination factor I-interacting protein 5) (TTF-I-interacting protein 5) (Tip5) | Baz2a (Tip5)                          | 36  | 15  | 56 | 55 |
| P45591 | Cofilin-2 (Cofilin, muscle isoform)                                                                                                                   | Cfl2                                  | 528 | 431 | 39 | 38 |
| P16406 | Glutamyl aminopeptidase (EC 3.4.11.7) (EAP) (Aminopeptidase A) (APA) (BP-1/6C3 antigen) (CD antigen CD249)                                            | Enpep                                 | 98  | 90  | 48 | 46 |
| P97412 | Lysosomal-trafficking regulator (Beige protein) (CHS1 homolog)                                                                                        | Lyst (Bg) (Chs1)                      | 46  | 27  | 33 | 31 |
| Q9CPR4 | 60S ribosomal protein L17                                                                                                                             | Rpl17                                 | 187 | 135 | 15 | 14 |
| Q99PF4 | Cadherin-23 (Otocadherin)                                                                                                                             | Cdh23                                 | 29  | 32  | 29 | 27 |
| Q9D6Z1 | Nucleolar protein 5A (Nucleolar protein Nop56)                                                                                                        | Nol5a (Nop56)                         | 38  | 39  | 14 | 13 |
| O35206 | Collagen alpha-1(XV) chain [Cleaved into: Endostatin (Endostatin-XV)]                                                                                 | Col15a1                               | 31  | 37  | 12 | 11 |
| P35969 | Vascular endothelial growth factor receptor 1 (VEGFR-1) (EC 2.7.10.1) (Tyrosine-protein kinase receptor FLT) (FLT-1) (Embryonic receptor kinase 2)    | Flt1 (Emrk2) (Flt)                    | 29  | 36  | 35 | 32 |
| Q925Q8 | Dachshund homolog 2 (Dach2)                                                                                                                           | Dach2                                 | 22  | 30  | 9  | 8  |
| P43277 | Histone H1.3 (H1 VAR.4) (H1d)                                                                                                                         | Hist1h1d (H1f3)                       | 78  | 99  | 18 | 16 |
| Q68FD5 | Clathrin heavy chain 1                                                                                                                                | Cltc                                  | 944 | 884 | 88 | 78 |
| Q8BG95 | Protein phosphatase 1 regulatory subunit 12B (Myosin phosphatase-targeting subunit 2)                                                                 | Ppp1r12b (Mypt2)                      | 25  | 24  | 25 | 22 |
| Q9R0P5 | Destrin (Actin-depolymerizing factor) (ADF) (Sid 23)                                                                                                  | Dstn (Dsn) (Sid23)                    | 61  | 81  | 8  | 7  |
| Q9CZM2 | 60S ribosomal protein L15                                                                                                                             | Rpl15                                 | 225 | 107 | 21 | 18 |
| Q91VW5 | Golgin subfamily A member 4 (tGolgin-1)                                                                                                               | Golga4                                | 41  | 60  | 46 | 39 |

|        |                                                                                                                                                                                        |                             |     |     |    |    |
|--------|----------------------------------------------------------------------------------------------------------------------------------------------------------------------------------------|-----------------------------|-----|-----|----|----|
| Q9R0L6 | Pericentriolar material 1 protein (PCM-1) (mPCM-1)                                                                                                                                     | Pcm1                        | 24  | 30  | 19 | 16 |
| P14131 | 40S ribosomal protein S16                                                                                                                                                              | Rps16                       | 160 | 126 | 19 | 16 |
| Q9ES17 | Interleukin-21 (IL-21)                                                                                                                                                                 | Il21                        | 22  | 25  | 6  | 5  |
| Q8R4U0 | Stabilin-2 (Fasciclin, EGF-like, laminin-type EGF-like and link domain-containing scavenger receptor 2) (FEEL-2) [Cleaved into: Short form stabilin-2]                                 | Stab2 (Feel2)               | 25  | 43  | 12 | 10 |
| Q05816 | Fatty acid-binding protein, epidermal (E-FABP) (Fatty acid-binding protein 5) (Psoriasis-associated fatty acid-binding protein homolog) (PA-FABP) (Keratinocyte lipid-binding protein) | Fabp5 (Fabpe) (Klbp) (Mal1) | 331 | 206 | 18 | 15 |
| P11531 | Dystrophin                                                                                                                                                                             | Dmd                         | 25  | 16  | 66 | 55 |
| P09405 | Nucleolin (Protein C23)                                                                                                                                                                | Ncl (Nuc)                   | 775 | 872 | 78 | 65 |
| Q91XQ0 | Dynein heavy chain 8, axonemal (Axonemal beta dynein heavy chain 8) (Ciliary dynein heavy chain 8)                                                                                     | Dnahc8                      | 47  | 51  | 77 | 64 |
| P80316 | T-complex protein 1 subunit epsilon (TCP-1-epsilon) (CCT-epsilon)                                                                                                                      | Cct5 (Ccte) (Kiaa0098)      | 239 | 102 | 17 | 14 |
| Q6DFV7 | Nuclear receptor coactivator 7                                                                                                                                                         | Ncoa7                       | 25  | 16  | 11 | 9  |
| Q64512 | Tyrosine-protein phosphatase non-receptor type 13 (EC 3.1.3.48) (Protein tyrosine phosphatase PTP-BL) (Protein-tyrosine phosphatase RIP) (Protein tyrosine phosphatase DPZPTP) (PTP36) | Ptpn13 (Ptp14)              | 28  | 27  | 26 | 21 |
| P17182 | Alpha-enolase (EC 4.2.1.11) (2-phospho-D-glycerate hydro-lyase) (Non-neural enolase) (NNE) (Enolase 1)                                                                                 | Eno1 (Eno-1)                | 976 | 802 | 62 | 50 |
| P54923 | [Protein ADP-ribosylarginine] hydrolase (ADP-ribosylarginine hydrolase) (EC 3.2.2.19) (ADP-ribose-L-arginine cleaving enzyme)                                                          | Adprh (Arh1)                | 20  | 41  | 15 | 12 |
| Q8VI47 | Canalicular multispecific organic anion transporter 1 (ATP-binding cassette sub-family C member 2)                                                                                     | Abcc2                       | 31  | 38  | 39 | 31 |

|        |                                                                                                                                                                                                                                        |                                        |      |     |     |     |
|--------|----------------------------------------------------------------------------------------------------------------------------------------------------------------------------------------------------------------------------------------|----------------------------------------|------|-----|-----|-----|
| Q99MD9 | Nuclear autoantigenic sperm protein (NASP)                                                                                                                                                                                             | Nasp                                   | 365  | 293 | 34  | 27  |
| Q9JHU4 | Cytoplasmic dynein 1 heavy chain 1 (Cytoplasmic dynein heavy chain 1) (Dynein heavy chain, cytosolic)                                                                                                                                  | Dync1h1 (Dhc1) (Dnch1) (Dnchc1) (Dyhc) | 822  | 395 | 157 | 123 |
| P06151 | L-lactate dehydrogenase A chain (LDH-A) (EC 1.1.1.27) (LDH muscle subunit) (LDH-M)                                                                                                                                                     | Ldha (Ldh-1) (Ldh1)                    | 1033 | 421 | 74  | 57  |
| Q7TMK6 | Protein Hook homolog 2                                                                                                                                                                                                                 | Hook2                                  | 33   | 36  | 26  | 20  |
| P47856 | Glucosamine--fructose-6-phosphate aminotransferase [isomerizing] 1 (EC 2.6.1.16) (Glutamine:fructose 6 phosphate amidotransferase 1) (GFAT 1) (GFAT1) (D-fructose-6-phosphate amidotransferase 1) (Hexosephosphate aminotransferase 1) | Gfpt1 (Gfpt)                           | 17   | 29  | 17  | 13  |
| P97434 | Myosin phosphatase Rho-interacting protein (Rho-interacting protein 3) (RIP3) (p116Rip)                                                                                                                                                | Mrip (Kiaa0864) (Mrip) (Rhoip3)        | 35   | 23  | 25  | 19  |
| P56480 | ATP synthase subunit beta, mitochondrial (EC 3.6.3.14)                                                                                                                                                                                 | Atp5b                                  | 31   | 50  | 8   | 6   |
| Q9DBP5 | UMP-CMP kinase (EC 2.7.4.14) (Cytidylate kinase) (Deoxycytidylate kinase) (Cytidine monophosphate kinase) (Uridine monophosphate kinase) (Uridine monophosphate/cytidine monophosphate kinase) (UMP/CMP kinase) (UMP/CMPK)             | Cmpk1 (Cmk) (Cmpk) (Uck) (Umk) (Umpk)  | 107  | 93  | 12  | 9   |
| P25233 | Necdin                                                                                                                                                                                                                                 | Ndn                                    | 30   | 23  | 16  | 12  |
| Q9D8V0 | Minor histocompatibility antigen H13 (EC 3.4.23.-) (Signal peptide peptidase) (Presenilin-like protein 3)                                                                                                                              | Hm13 (H13) (Psl3)                      | 23   | 29  | 28  | 21  |
| P25444 | 40S ribosomal protein S2 (S4) (LLRep3 protein)                                                                                                                                                                                         | Rps2 (Llrep3) (Rps4)                   | 217  | 50  | 26  | 19  |

|        |                                                                                                                                                                                                                                         |                                                                  |     |     |    |    |
|--------|-----------------------------------------------------------------------------------------------------------------------------------------------------------------------------------------------------------------------------------------|------------------------------------------------------------------|-----|-----|----|----|
| Q80TS7 | Dendrin                                                                                                                                                                                                                                 | Ddn (Gm748)<br>(Kiaa0749)                                        | 31  | 24  | 11 | 8  |
| P62991 | Ubiquitin                                                                                                                                                                                                                               | Rps27a<br>(Uba80)<br>(Ubcep1);<br>Uba52<br>(Ubcep2);<br>Ubb; Ubc | 61  | 54  | 11 | 8  |
| Q61696 | Heat shock 70 kDa protein 1A (Heat shock 70 kDa protein 3) (HSP70.3) (Hsp68)                                                                                                                                                            | Hspa1a<br>(Hsp70-3)<br>(Hsp70A1)                                 | 266 | 236 | 33 | 24 |
| P27659 | 60S ribosomal protein L3 (J1 protein)                                                                                                                                                                                                   | Rpl3                                                             | 192 | 75  | 25 | 18 |
| Q8BX70 | Vacuolar protein sorting-associated protein 13C                                                                                                                                                                                         | Vps13c<br>(Kiaa3021)                                             | 25  | 17  | 53 | 38 |
| Q60673 | Receptor-type tyrosine-protein phosphatase-like N (R-PTP-N) (PTP IA-2)                                                                                                                                                                  | Ptpn (Ptp35)                                                     | 30  | 18  | 14 | 10 |
| P14148 | 60S ribosomal protein L7                                                                                                                                                                                                                | Rpl7                                                             | 145 | 52  | 14 | 10 |
| P14869 | 60S acidic ribosomal protein P0 (L10E)                                                                                                                                                                                                  | Rplp0 (Arbp)                                                     | 115 | 334 | 28 | 20 |
| P17751 | Triosephosphate isomerase (TIM) (EC 5.3.1.1) (Triose-phosphate isomerase)                                                                                                                                                               | Tpi1 (Tpi)                                                       | 706 | 519 | 35 | 25 |
| Q920E5 | Farnesyl pyrophosphate synthetase (FPP synthetase) (FPS) (Farnesyl diphosphate synthetase) (Cholesterol-regulated 39 kDa protein) (CR 39) [Includes: Dimethylallyltranstransferase (EC 2.5.1.1); Geranyltranstransferase (EC 2.5.1.10)] | Fdps                                                             | 107 | 43  | 17 | 12 |
| P51410 | 60S ribosomal protein L9                                                                                                                                                                                                                | Rpl9                                                             | 187 | 212 | 17 | 12 |
| Q91YJ5 | Translation initiation factor IF-2, mitochondrial (IF-2Mt) (IF2(mt)) (IF-2(Mt))                                                                                                                                                         | Mtif2                                                            | 29  | 23  | 13 | 9  |
| Q62168 | Keratin, type I cuticular Ha2 (Hair keratin, type I Ha2) (Keratin-32) (K32)                                                                                                                                                             | Krt32 (Hka2)<br>(Krt1-2)<br>(Krtha2)                             | 39  | 36  | 9  | 6  |
| Q8K4L3 | Supervillin (Archvillin) (p205/p250)                                                                                                                                                                                                    | Svil                                                             | 25  | 22  | 18 | 12 |
| P42932 | T-complex protein 1 subunit theta (TCP-1-theta) (CCT-theta)                                                                                                                                                                             | Cct8 (Cctq)                                                      | 197 | 57  | 23 | 15 |
| Q9CXW4 | 60S ribosomal protein L11                                                                                                                                                                                                               | Rpl11                                                            | 72  | 79  | 11 | 7  |



|                               |        |                                                                                                                                                                        |                                    |      |     |     |    |
|-------------------------------|--------|------------------------------------------------------------------------------------------------------------------------------------------------------------------------|------------------------------------|------|-----|-----|----|
|                               | Q8BGR5 | Protein FAM53B                                                                                                                                                         | Fam53b                             | 47   | 41  | 19  | 12 |
|                               | Q80U87 | Ubiquitin carboxyl-terminal hydrolase 8 (EC 3.1.2.15) (Ubiquitin thioesterase 8) (Ubiquitin-specific-processing protease 8) (Deubiquitinating enzyme 8) (mUBPy)        | Usp8 (Kiaa0055) (UbpY)             | 29   | 23  | 24  | 15 |
|                               | P62717 | 60S ribosomal protein L18a                                                                                                                                             | Rpl18a                             | 242  | 62  | 21  | 13 |
|                               | P16125 | L-lactate dehydrogenase B chain (LDH-B) (EC 1.1.1.27) (LDH heart subunit) (LDH-H)                                                                                      | Ldhb (Ldh-2) (Ldh2)                | 315  | 214 | 34  | 21 |
|                               | Q68ED2 | Metabotropic glutamate receptor 7 (mGluR7)                                                                                                                             | Grm7 (Gprc1g) (Mglur7)             | 37   | 33  | 13  | 8  |
|                               | O35551 | Rab GTPase-binding effector protein 1 (Rabaptin-5) (Rabaptin-5alpha)                                                                                                   | Rabep1 (Rab5ep) (Rabpt5) (Rabpt5a) | 33   | 26  | 26  | 16 |
|                               | Q9Z0P5 | Twinfilin-2 (Twinfilin-1-like protein) (A6-related protein) (mA6RP)                                                                                                    | Twf2 (Ptk9I)                       | 29   | 32  | 10  | 6  |
|                               | P63017 | Heat shock cognate 71 kDa protein (Heat shock 70 kDa protein 8)                                                                                                        | Hspa8 (Hsc70) (Hsc73)              | 1719 | 959 | 119 | 70 |
|                               | P05532 | Mast/stem cell growth factor receptor (SCFR) (EC 2.7.10.1) (Proto-oncogene tyrosine-protein kinase Kit) (c-kit) (CD antigen CD117)                                     | Kit (SI)                           | 16   | 35  | 12  | 7  |
|                               | P47757 | F-actin-capping protein subunit beta (CapZ beta)                                                                                                                       | Capzb (Cappb1)                     | 107  | 68  | 7   | 4  |
|                               | Q8BHK0 | Paraneoplastic antigen Ma2 homolog                                                                                                                                     | Pnma2                              | 36   | 22  | 9   | 5  |
|                               | O88844 | Isocitrate dehydrogenase [NADP] cytoplasmic (IDH) (EC 1.1.1.42) (Cytosolic NADP-isocitrate dehydrogenase) (Oxalosuccinate decarboxylase) (NADP(+)-specific ICDH) (IDP) | Idh1                               | 155  | 163 | 15  | 8  |
| KRAB box transcription factor | P06745 | Glucose-6-phosphate isomerase (GPI) (EC 5.3.1.9) (Phosphoglucose isomerase) (PGI) (Phosphohexose isomerase) (PHI) (Neuroleukin) (NLK)                                  | Gpi (Gpi1)                         | 39   | 107 | 12  | 22 |

|        |                                                                                                                                                             |                                                                                                                                                 |     |      |    |     |
|--------|-------------------------------------------------------------------------------------------------------------------------------------------------------------|-------------------------------------------------------------------------------------------------------------------------------------------------|-----|------|----|-----|
| P56716 | Oxygen-regulated protein 1 (Retinitis pigmentosa RP1 protein homolog)                                                                                       | Rp1 (Orp1) (Rp1h)                                                                                                                               | 31  | 49   | 58 | 104 |
| P62962 | Profilin-1 (Profilin I)                                                                                                                                     | Pfn1                                                                                                                                            | 30  | 93   | 4  | 7   |
| Q8BFQ9 | Kelch domain-containing protein 5                                                                                                                           | Klhdc5 (Kiaa1340)                                                                                                                               | 30  | 22   | 10 | 17  |
| Q9ERK4 | Exportin-2 (Exp2) (Importin-alpha re-exporter) (Chromosome segregation 1-like protein)                                                                      | Cse1l (Xpo2)                                                                                                                                    | 42  | 153  | 26 | 44  |
| P57776 | Elongation factor 1-delta (EF-1-delta)                                                                                                                      | Eef1d                                                                                                                                           | 109 | 35   | 3  | 5   |
| P35980 | 60S ribosomal protein L18                                                                                                                                   | Rpl18                                                                                                                                           | 32  | 22   | 51 | 85  |
| P62806 | Histone H4                                                                                                                                                  | Hist1h4a; Hist1h4b (H4-53); Hist1h4c (H4-12); Hist1h4d; Hist1h4f; Hist1h4h; Hist1h4i; Hist1h4j; Hist1h4k; Hist1h4m; Hist2h4a (Hist2h4); Hist4h4 | 815 | 1617 | 47 | 78  |
| Q922U2 | Keratin, type II cytoskeletal 5 (Cytokeratin-5) (CK-5) (Keratin-5) (K5)                                                                                     | Krt5 (Krt2-5)                                                                                                                                   | 396 | 550  | 23 | 38  |
| Q64475 | Histone H2B type 1-B (h2B-143)                                                                                                                              | Hist1h2bb                                                                                                                                       | 436 | 999  | 46 | 75  |
| Q8BHG1 | Nardilysin (EC 3.4.24.61) (N-arginine dibasic convertase) (NRD convertase) (NRD-C)                                                                          | Nrd1                                                                                                                                            | 53  | 54   | 13 | 21  |
| Q8VDM4 | 26S proteasome non-ATPase regulatory subunit 2 (26S proteasome regulatory subunit RPN1) (26S proteasome regulatory subunit S2) (26S proteasome subunit p97) | Psm2                                                                                                                                            | 113 | 157  | 18 | 29  |
| Q8CCP0 | Serologically defined colon cancer antigen 1 homolog                                                                                                        | Sdccag1                                                                                                                                         | 37  | 31   | 21 | 33  |

|        |                                                                                                                                                                    |                                   |     |     |    |    |
|--------|--------------------------------------------------------------------------------------------------------------------------------------------------------------------|-----------------------------------|-----|-----|----|----|
| Q7TN83 | Synaptotagmin-16 (Synaptotagmin XIV-related protein) (Synaptotagmin 14-like protein)                                                                               | Syt16 (Strep14) (Syt14l) (Syt14r) | 20  | 38  | 6  | 9  |
| Q8BUG5 | Calcyphosin-2 (Calcyphosine-2)                                                                                                                                     | Caps2                             | 17  | 28  | 8  | 12 |
| Q9CQY5 | Magnesium transporter protein 1 (MagT1) (Implantation-associated protein) (IAP)                                                                                    | Magt1 (Iag2)                      | 26  | 22  | 8  | 12 |
| Q62522 | Zona pellucida-binding protein 1 (Sp38)                                                                                                                            | Zpbp (Zpbp1)                      | 38  | 42  | 8  | 12 |
| Q99K85 | Phosphoserine aminotransferase (PSAT) (EC 2.6.1.52) (Phosphohydroxythreonine aminotransferase) (Endometrial progesterone-induced protein) (EPIP)                   | Psat1 (Psa) (Psat)                | 162 | 541 | 16 | 24 |
| P61982 | 14-3-3 protein gamma                                                                                                                                               | Ywhag                             | 653 | 841 | 53 | 79 |
| P53657 | Pyruvate kinase isozymes R/L (EC 2.7.1.40) (L PK)                                                                                                                  | Pklr                              | 144 | 270 | 26 | 38 |
| P99026 | Proteasome subunit beta type-4 (Proteasome beta chain) (EC 3.4.25.1) (Macropain beta chain) (Multicatalytic endopeptidase complex beta chain) (Proteasome chain 3) | Psmb4 (Lmp3)                      | 93  | 289 | 11 | 16 |
| Q00342 | FL cytokine receptor (EC 2.7.10.1) (Tyrosine-protein kinase receptor flk-2) (Fetal liver kinase 2) (Tyrosine-protein kinase FLT3) (CD antigen CD135)               | Flt3 (Flk-2) (Flt3)               | 17  | 34  | 7  | 10 |
| O08807 | Peroxiredoxin-4 (EC 1.11.1.15) (Prx-IV) (Thioredoxin peroxidase AO372) (Thioredoxin-independent peroxide reductase A0372) (Antioxidant enzyme AOE372)              | Prdx4                             | 273 | 421 | 25 | 34 |
| Q6P8J2 | Diamine acetyltransferase 2 (EC 2.3.1.57) (Spermidine/spermine N(1)-acetyltransferase 2) (Polyamine N-acetyltransferase 2)                                         | Sat2 (Ssat2)                      | 33  | 23  | 6  | 8  |
| Q9ERU9 | E3 SUMO-protein ligase RanBP2 (Ran-binding protein 2)                                                                                                              | Ranbp2                            | 56  | 49  | 40 | 53 |

|        |                                                                                                                                                                                                       |                             |     |      |    |    |
|--------|-------------------------------------------------------------------------------------------------------------------------------------------------------------------------------------------------------|-----------------------------|-----|------|----|----|
| P35700 | Peroxiredoxin-1 (EC 1.11.1.15) (Thioredoxin peroxidase 2) (Thioredoxin-dependent peroxide reductase 2) (Osteoblast-specific factor 3) (OSF-3) (Macrophage 23 kDa stress protein)                      | Prdx1 (Msp23) (Paga) (Tdp2) | 836 | 1095 | 75 | 99 |
| Q9Z277 | Bromodomain adjacent to zinc finger domain protein 1B (Williams-Beuren syndrome chromosomal region 9 protein homolog) (WBRS9)                                                                         | Baz1b (Wbscr9)              | 43  | 17   | 26 | 34 |
| Q80X50 | Ubiquitin-associated protein 2-like                                                                                                                                                                   | Ubp2l                       | 63  | 54   | 4  | 5  |
| P17183 | Gamma-enolase (EC 4.2.1.11) (2-phospho-D-glycerate hydro-lyase) (Neural enolase) (Neuron-specific enolase) (NSE) (Enolase 2)                                                                          | Eno2 (Eno-2)                | 228 | 181  | 12 | 15 |
| Q80Z38 | SH3 and multiple ankyrin repeat domains protein 2 (Shank2) (Cortactin-binding protein 1) (CortBP1)                                                                                                    | Shank2 (Cortbp1) (Kiaa1022) | 41  | 57   | 21 | 26 |
| P51880 | Fatty acid-binding protein, brain (B-FABP) (Fatty acid-binding protein 7) (Brain lipid-binding protein) (BLBP)                                                                                        | Fabp7 (Blbp)                | 933 | 856  | 31 | 38 |
| P59270 | Galactosylgalactosylxylosylprotein 3-beta-glucuronosyltransferase 2 (EC 2.4.1.135) (Beta-1,3-glucuronyltransferase 2) (UDP-glucuronosyltransferase-S) (Glucuronosyltransferase-S) (GlcAT-S) (GlcAT-D) | B3gat2 (Glcats)             | 29  | 16   | 9  | 11 |
| Q9R1P0 | Proteasome subunit alpha type-4 (EC 3.4.25.1) (Proteasome component C9) (Macropain subunit C9) (Multicatalytic endopeptidase complex subunit C9) (Proteasome subunit L)                               | Psma4                       | 29  | 151  | 14 | 17 |
| Q8BFY9 | Transportin-1 (Importin beta-2) (Karyopherin beta-2)                                                                                                                                                  | Tnpo1 (Kpnb2)               | 54  | 43   | 10 | 12 |
| Q60575 | Kinesin-like protein KIF1B                                                                                                                                                                            | Kif1b                       | 45  | 95   | 30 | 36 |

|        |                                                                                                                                                                                                                       |                         |     |     |     |     |
|--------|-----------------------------------------------------------------------------------------------------------------------------------------------------------------------------------------------------------------------|-------------------------|-----|-----|-----|-----|
| P54103 | DnaJ homolog subfamily C member 2 (Zuotin-related factor 1) (Mouse Id associate 1) (MIDA1)                                                                                                                            | Dnajc2 (Mida1) (Zrf1)   | 23  | 27  | 11  | 13  |
| P80313 | T-complex protein 1 subunit eta (TCP-1-eta) (CCT-eta)                                                                                                                                                                 | Cct7 (Ccth)             | 49  | 50  | 11  | 13  |
| Q61171 | Peroxiredoxin-2 (EC 1.11.1.15) (Thioredoxin peroxidase 1) (Thioredoxin-dependent peroxide reductase 1) (Thiol-specific antioxidant protein) (TSA)                                                                     | Prdx2 (Tdp1) (Tpx)      | 568 | 898 | 47  | 55  |
| Q61122 | NGFI-A-binding protein 1 (EGR-1-binding protein 1)                                                                                                                                                                    | Nab1                    | 30  | 25  | 6   | 7   |
| Q6GSS7 | Histone H2A type 2-A (H2A.2) (H2a-614) (H2a-615)                                                                                                                                                                      | Hist2h2aa1; Hist2h2aa2  | 505 | 763 | 18  | 21  |
| P48754 | Breast cancer type 1 susceptibility protein homolog                                                                                                                                                                   | Brca1                   | 28  | 25  | 26  | 30  |
| Q9Z2K1 | Keratin, type I cytoskeletal 16 (Cytokeratin-16) (CK-16) (Keratin-16) (K16)                                                                                                                                           | Krt16 (Krt1-16)         | 37  | 37  | 7   | 8   |
| Q6A4J8 | Ubiquitin carboxyl-terminal hydrolase 7 (EC 3.1.2.15) (Ubiquitin thioesterase 7) (Ubiquitin-specific-processing protease 7) (Deubiquitinating enzyme 7) (Herpesvirus-associated ubiquitin-specific protease) (mHAUSP) | Usp7 (Hausp)            | 27  | 18  | 14  | 16  |
| P55200 | Histone-lysine N-methyltransferase HRX (EC 2.1.1.43) (Zinc finger protein HRX) (ALL-1)                                                                                                                                | Mll (All1) (Hrx) (Mll1) | 67  | 26  | 39  | 44  |
| Q9WUU9 | 80 kDa MCM3-associated protein (Protein GANP)                                                                                                                                                                         | Mcm3ap (Ganp) (Map80)   | 48  | 32  | 17  | 19  |
| Q9WUF3 | CASP8-associated protein 2 (FLICE-associated huge protein)                                                                                                                                                            | Casp8ap2 (Flash)        | 28  | 16  | 26  | 29  |
| P26618 | Alpha-type platelet-derived growth factor receptor (EC 2.7.10.1) (PDGF-R-alpha) (CD140 antigen-like family member A) (CD antigen CD140a)                                                                              | Pdgfra                  | 37  | 73  | 160 | 178 |

|        |                                                                                                                                                                                                    |                                    |      |      |     |     |
|--------|----------------------------------------------------------------------------------------------------------------------------------------------------------------------------------------------------|------------------------------------|------|------|-----|-----|
| Q91ZT5 | FYVE, RhoGEF and PH domain-containing protein 4 (Actin filament-binding protein frabin) (FGD1-related F-actin-binding protein)                                                                     | Fgd4                               | 29   | 19   | 10  | 11  |
| O55234 | Proteasome subunit beta type-5 (EC 3.4.25.1) (Proteasome epsilon chain) (Macropain epsilon chain) (Multicatalytic endopeptidase complex epsilon chain) (Proteasome subunit X) (Proteasome chain 6) | Psmb5                              | 168  | 227  | 10  | 11  |
| P49717 | DNA replication licensing factor MCM4 (CDC21 homolog) (P1-CDC21)                                                                                                                                   | Mcm4 (Cdc21) (Mcmd4)               | 29   | 18   | 11  | 12  |
| P07901 | Heat shock protein HSP 90-alpha (HSP 86) (Tumor-specific transplantation 86 kDa antigen) (TSTA)                                                                                                    | Hsp90aa1 (Hsp86) (Hsp86-1) (Hspca) | 1529 | 2324 | 134 | 146 |
| Q8BKC5 | Importin-5 (Imp5) (Importin subunit beta-3) (Karyopherin beta-3) (Ran-binding protein 5) (RanBP5)                                                                                                  | Ipo5 (Kpnb3) (Ranbp5)              | 185  | 91   | 12  | 13  |
| P11984 | T-complex protein 1 subunit alpha A (TCP-1-alpha) (CCT-alpha) (Tailless complex polypeptide 1A) (TCP-1-A)                                                                                          | Cct1 (Ccta) (Tcp1)                 | 29   | 66   | 14  | 15  |
| Q3TY86 | Apoptosis-inducing factor 3 (EC 1.-.-) (Apoptosis-inducing factor-like protein)                                                                                                                    | Aifm3 (Aifl)                       | 42   | 26   | 28  | 30  |
| Q8VI56 | Low-density lipoprotein receptor-related protein 4 (LDLR dan)                                                                                                                                      | Lrp4 (Kiaa0816)                    | 77   | 30   | 19  | 20  |
| P16546 | Spectrin alpha chain, brain (Spectrin, non-erythroid alpha chain) (Alpha-II spectrin) (Fodrin alpha chain)                                                                                         | Sptan1 (Spna2) (Spta2)             | 68   | 86   | 66  | 69  |
| O35973 | Period circadian protein homolog 1 (Circadian clock protein PERIOD 1) (Circadian pacemaker protein Rigui) (mPER1)                                                                                  | Per1 (Per) (Rigui)                 | 29   | 21   | 27  | 28  |
| P62281 | 40S ribosomal protein S11                                                                                                                                                                          | Rps11                              | 166  | 132  | 27  | 28  |
| Q8R0W0 | Epiplakin                                                                                                                                                                                          | Eppk1                              | 48   | 25   | 49  | 50  |

|        |                                                                                                                                                                                                              |                                                   |     |     |     |     |
|--------|--------------------------------------------------------------------------------------------------------------------------------------------------------------------------------------------------------------|---------------------------------------------------|-----|-----|-----|-----|
| P26350 | Prothymosin alpha [Cleaved into: Thymosin alpha]                                                                                                                                                             | Ptma                                              | 34  | 120 | 2   | 2   |
| Q60865 | Caprin-1 (Cytoplasmic activation- and proliferation-associated protein 1) (GPI-anchored membrane protein 1) (GPI-anchored protein p137) (p137GPI) (Membrane component chromosome 11 surface marker 1)        | Caprin1 (Gpiap) (Gpiap1) (Gpip137) (M11s1) (G5E5) | 20  | 26  | 5   | 5   |
| P12367 | cAMP-dependent protein kinase type II-alpha regulatory subunit                                                                                                                                               | Prkar2a                                           | 33  | 23  | 5   | 5   |
| Q3TXZ1 | Zinc finger protein 575                                                                                                                                                                                      | Znf575 (Zfp575)                                   | 30  | 25  | 5   | 5   |
| Q6P5F9 | Exportin-1 (Exp1) (Chromosome region maintenance 1 protein homolog)                                                                                                                                          | Xpo1 (Crm1)                                       | 19  | 43  | 9   | 9   |
| Q9DAI4 | Zinc finger and BTB domain-containing protein 43 (Zinc finger protein 297B)                                                                                                                                  | Zbtb43 (Kiaa0414) (Zfp297b) (Znf297b)             | 23  | 51  | 9   | 9   |
| Q9CQ60 | 6-phosphogluconolactonase (6PGL) (EC 3.1.1.31)                                                                                                                                                               | Pgls                                              | 148 | 41  | 11  | 11  |
| Q9QYX7 | Protein piccolo (Aczonin) (Multidomain presynaptic cytomatrix protein) (Brain-derived HLMN protein)                                                                                                          | Pclo (Acz)                                        | 101 | 117 | 114 | 114 |
| Q91YE5 | Bromodomain adjacent to zinc finger domain protein 2A (Transcription termination factor I-interacting protein 5) (TTF-I-interacting protein 5) (Tip5)                                                        | Baz2a (Tip5)                                      | 36  | 15  | 56  | 55  |
| Q8R4B8 | NACHT, LRR and PYD domains-containing protein 3 (Cold autoinflammatory syndrome 1 protein homolog) (Cryopyrin) (PYRIN-containing APAF1-like protein 1) (Mast cell maturation-associated-inducible protein 1) | Nlrp3 (Cias1) (Mmig1) (Nalp3) (Pypaf1)            | 30  | 20  | 24  | 23  |
| Q8BGQ7 | Alanyl-tRNA synthetase, cytoplasmic (EC 6.1.1.7) (Alanine--tRNA ligase) (AlaRS)                                                                                                                              | Aars                                              | 179 | 216 | 23  | 22  |
| P07724 | Serum albumin                                                                                                                                                                                                | Alb (Alb-1) (Alb1)                                | 550 | 572 | 22  | 21  |

|        |                                                                                                                                                                                 |                                   |     |     |    |    |
|--------|---------------------------------------------------------------------------------------------------------------------------------------------------------------------------------|-----------------------------------|-----|-----|----|----|
| P97412 | Lysosomal-trafficking regulator (Beige protein) (CHS1 homolog)                                                                                                                  | Lyst (Bg) (Chs1)                  | 46  | 27  | 33 | 31 |
| Q99PF4 | Cadherin-23 (Otocadherin)                                                                                                                                                       | Cdh23                             | 29  | 32  | 29 | 27 |
| Q8CGC6 | RNA-binding protein 28 (RNA-binding motif protein 28)                                                                                                                           | Rbm28                             | 24  | 41  | 71 | 66 |
| Q9D6Z1 | Nucleolar protein 5A (Nucleolar protein Nop56)                                                                                                                                  | Nol5a (Nop56)                     | 38  | 39  | 14 | 13 |
| Q6TXD4 | Dynamamin-binding protein (Scaffold protein Tuba)                                                                                                                               | Dnmbp (Kiaa1010)                  | 32  | 21  | 13 | 12 |
| Q8R5G7 | Centaurin-delta-3 (Cnt-d3) (Arf-GAP, Rho-GAP, ankyrin repeat and pleckstrin homology domain-containing protein 3) (Dual specificity Rho- and Arf-GTPase-activating protein 1)   | Centd3 (Arap3) (Drag1) (Kiaa4097) | 21  | 27  | 26 | 24 |
| P35969 | Vascular endothelial growth factor receptor 1 (VEGFR-1) (EC 2.7.10.1) (Tyrosine-protein kinase receptor FLT) (FLT-1) (Embryonic receptor kinase 2)                              | Flt1 (Emrk2) (Flt)                | 29  | 36  | 35 | 32 |
| Q01853 | Transitional endoplasmic reticulum ATPase (TER ATPase) (15S Mg(2+)-ATPase p97 subunit) (Valosin-containing protein) (VCP)                                                       | Vcp                               | 691 | 699 | 56 | 51 |
| Q9WTR0 | Matrix metalloproteinase-16 (MMP-16) (EC 3.4.24.-) (Membrane-type matrix metalloproteinase 3) (MT-MMP 3) (MTMMP3) (Membrane-type-3 matrix metalloproteinase) (MT3-MMP) (MT3MMP) | Mmp16                             | 17  | 36  | 11 | 10 |
| Q8R4U7 | Leucine zipper protein 1 (Leucine zipper motif-containing protein)                                                                                                              | Luzp1 (Luzp)                      | 31  | 32  | 22 | 20 |
| P43406 | Integrin alpha-V (Vitronectin receptor subunit alpha) (CD antigen CD51) [Cleaved into: Integrin alpha-V heavy chain; Integrin alpha-V light chain]                              | Itgav                             | 23  | 35  | 19 | 17 |
| Q9DBJ1 | Phosphoglycerate mutase 1 (EC 5.4.2.1) (EC 5.4.2.4) (EC 3.1.3.13) (Phosphoglycerate mutase isozyme B) (PGAM-B) (BPG-dependent PGAM 1)                                           | Pgam1                             | 612 | 746 | 35 | 31 |



|        |                                                                                                                                                                                                                                                      |                              |     |     |    |    |
|--------|------------------------------------------------------------------------------------------------------------------------------------------------------------------------------------------------------------------------------------------------------|------------------------------|-----|-----|----|----|
| Q61147 | Ceruloplasmin (EC 1.16.3.1) (Ferroxidase)                                                                                                                                                                                                            | Cp                           | 24  | 27  | 41 | 36 |
| Q99PG2 | Opioid growth factor receptor (OGFr) (Zeta-type opioid receptor)                                                                                                                                                                                     | Ogfr                         | 38  | 24  | 8  | 7  |
| P70195 | Proteasome subunit beta type-7 (EC 3.4.25.1) (Proteasome subunit Z) (Macropain chain Z) (Multicatalytic endopeptidase complex chain Z)                                                                                                               | Psmb7 (Mmc14)                | 39  | 40  | 8  | 7  |
| Q924C1 | Exportin-5 (Exp5) (Ran-binding protein 21)                                                                                                                                                                                                           | Xpo5 (Kiaa1291) (Ranbp21)    | 20  | 62  | 15 | 13 |
| Q9JJK8 | Serine/threonine-protein kinase ATR (EC 2.7.11.1) (Ataxia telangiectasia and Rad3-related protein)                                                                                                                                                   | Atr                          | 20  | 25  | 72 | 62 |
| Q9D868 | Peptidyl-prolyl cis-trans isomerase H (PPIase H) (Rotamase H) (EC 5.2.1.8)                                                                                                                                                                           | Ppih                         | 55  | 31  | 7  | 6  |
| Q9CYF5 | Williams-Beuren syndrome chromosomal region 16 protein homolog                                                                                                                                                                                       | Wbscr16                      | 38  | 28  | 7  | 6  |
| P11881 | Inositol 1,4,5-trisphosphate receptor type 1 (Type 1 inositol 1,4,5-trisphosphate receptor) (Type 1 InsP3 receptor) (IP3 receptor isoform 1) (InsP3R1) (Inositol 1,4,5-trisphosphate-binding protein P400) (Purkinje cell protein 1) (Protein PCD-6) | Itpr1 (Insp3r) (Pcd6) (Pcp1) | 37  | 42  | 48 | 41 |
| Q6ZWN5 | 40S ribosomal protein S9                                                                                                                                                                                                                             | Rps9                         | 459 | 248 | 47 | 40 |
| Q91VW5 | Golgin subfamily A member 4 (tGolgin-1)                                                                                                                                                                                                              | Golga4                       | 41  | 60  | 46 | 39 |
| Q9R0L6 | Pericentriolar material 1 protein (PCM-1) (mPCM-1)                                                                                                                                                                                                   | Pcm1                         | 24  | 30  | 19 | 16 |
| P14131 | 40S ribosomal protein S16                                                                                                                                                                                                                            | Rps16                        | 160 | 126 | 19 | 16 |
| Q80TB8 | Probable oxidoreductase KIAA1576 (EC 1.1.1.1)                                                                                                                                                                                                        | Kiaa1576                     | 25  | 14  | 25 | 21 |
| P11983 | T-complex protein 1 subunit alpha B (TCP-1-alpha) (CCT-alpha) (Tailless complex polypeptide 1B) (TCP-1-B)                                                                                                                                            | Cct1 (Ccta) (Tcp1)           | 29  | 66  | 18 | 15 |
| P09405 | Nucleolin (Protein C23)                                                                                                                                                                                                                              | Ncl (Nuc)                    | 775 | 872 | 78 | 65 |

|        |                                                                                                                                                                                        |                 |     |     |     |     |
|--------|----------------------------------------------------------------------------------------------------------------------------------------------------------------------------------------|-----------------|-----|-----|-----|-----|
| Q91XQ0 | Dynein heavy chain 8, axonemal (Axonemal beta dynein heavy chain 8) (Ciliary dynein heavy chain 8)                                                                                     | Dnahc8          | 47  | 51  | 77  | 64  |
| Q6DFV7 | Nuclear receptor coactivator 7                                                                                                                                                         | Ncoa7           | 25  | 16  | 11  | 9   |
| Q64512 | Tyrosine-protein phosphatase non-receptor type 13 (EC 3.1.3.48) (Protein tyrosine phosphatase PTP-BL) (Protein-tyrosine phosphatase RIP) (Protein tyrosine phosphatase DPZPTP) (PTP36) | Ptpn13 (Ptp14)  | 28  | 27  | 26  | 21  |
| P17182 | Alpha-enolase (EC 4.2.1.11) (2-phospho-D-glycerate hydro-lyase) (Non-neural enolase) (NNE) (Enolase 1)                                                                                 | Eno1 (Eno-1)    | 976 | 802 | 62  | 50  |
| Q924C6 | Lysyl oxidase homolog 4 (EC 1.4.3.-) (Lysyl oxidase-like protein 4) (Lysyl oxidase-related protein C)                                                                                  | Loxl4 (Loxc)    | 15  | 28  | 5   | 4   |
| Q9Z1M8 | Protein Red (Protein RER) (IK factor) (Cytokine IK)                                                                                                                                    | Ik (Red) (Rer)  | 29  | 23  | 10  | 8   |
| P54923 | [Protein ADP-ribosylarginine] hydrolase (ADP-ribosylarginine hydrolase) (EC 3.2.2.19) (ADP-ribose-L-arginine cleaving enzyme)                                                          | Adprh (Arh1)    | 20  | 41  | 15  | 12  |
| P62852 | 40S ribosomal protein S25                                                                                                                                                              | Rps25           | 101 | 100 | 15  | 12  |
| Q8VI47 | Canalicular multispecific organic anion transporter 1 (ATP-binding cassette sub-family C member 2)                                                                                     | Abcc2           | 31  | 38  | 39  | 31  |
| Q99MD9 | Nuclear autoantigenic sperm protein (NASP)                                                                                                                                             | Nasp            | 365 | 293 | 34  | 27  |
| Q91ZU6 | Bullous pemphigoid antigen 1, isoforms 1/2/3/4 (BPA) (Hemidesmosomal plaque protein) (Dystonia musculorum protein) (Dystonin)                                                          | Dst (Bpag1)     | 78  | 38  | 126 | 100 |
| Q9QWL7 | Keratin, type I cytoskeletal 17 (Cytokeratin-17) (CK-17) (Keratin-17) (K17)                                                                                                            | Krt17 (Krt1-17) | 38  | 46  | 14  | 11  |

|        |                                                                                                                                                                                                                                        |                                        |      |     |     |     |
|--------|----------------------------------------------------------------------------------------------------------------------------------------------------------------------------------------------------------------------------------------|----------------------------------------|------|-----|-----|-----|
| Q9JHU4 | Cytoplasmic dynein 1 heavy chain 1 (Cytoplasmic dynein heavy chain 1) (Dynein heavy chain, cytosolic)                                                                                                                                  | Dync1h1 (Dhc1) (Dnch1) (Dnchc1) (Dyhc) | 822  | 395 | 157 | 123 |
| P06151 | L-lactate dehydrogenase A chain (LDH-A) (EC 1.1.1.27) (LDH muscle subunit) (LDH-M)                                                                                                                                                     | Ldha (Ldh-1) (Ldh1)                    | 1033 | 421 | 74  | 57  |
| Q7TMK6 | Protein Hook homolog 2                                                                                                                                                                                                                 | Hook2                                  | 33   | 36  | 26  | 20  |
| P47856 | Glucosamine--fructose-6-phosphate aminotransferase [isomerizing] 1 (EC 2.6.1.16) (Glutamine:fructose 6 phosphate amidotransferase 1) (GFAT 1) (GFAT1) (D-fructose-6-phosphate amidotransferase 1) (Hexosephosphate aminotransferase 1) | Gfpt1 (Gfpt)                           | 17   | 29  | 17  | 13  |
| Q569Z6 | Thyroid hormone receptor-associated protein 3 (Thyroid hormone receptor-associated protein complex 150 kDa component) (Trap150)                                                                                                        | Thrap3 (Trap150)                       | 29   | 48  | 21  | 16  |
| P39447 | Tight junction protein ZO-1 (Zonula occludens protein 1) (Zona occludens protein 1) (Tight junction protein 1)                                                                                                                         | Tjp1 (Zo1)                             | 36   | 15  | 21  | 16  |
| Q99MY8 | Probable histone-lysine N-methyltransferase ASH1L (EC 2.1.1.43) (Absent small and homeotic disks protein 1 homolog) (ASH1-like protein)                                                                                                | Ash1l                                  | 19   | 31  | 46  | 35  |
| P97434 | Myosin phosphatase Rho-interacting protein (Rho-interacting protein 3) (RIP3) (p116Rip)                                                                                                                                                | Mrip (Kiaa0864) (Mrip) (Rhoip3)        | 35   | 23  | 25  | 19  |
| P70670 | Nascent polypeptide-associated complex subunit alpha, muscle-specific form (Alpha-NAC, muscle-specific form)                                                                                                                           | Naca (Gm1878)                          | 22   | 130 | 29  | 22  |

|        |                                                                                                                                                                                                                            |                                       |     |     |    |    |
|--------|----------------------------------------------------------------------------------------------------------------------------------------------------------------------------------------------------------------------------|---------------------------------------|-----|-----|----|----|
| P16627 | Heat shock 70 kDa protein 1L (Heat shock 70 kDa protein 1-like) (Heat shock 70 kDa-like protein 1) (Spermatid-specific heat shock protein 70)                                                                              | Hspa1l (Hsc70t)                       | 319 | 238 | 33 | 25 |
| Q9DBP5 | UMP-CMP kinase (EC 2.7.4.14) (Cytidylate kinase) (Deoxycytidylate kinase) (Cytidine monophosphate kinase) (Uridine monophosphate kinase) (Uridine monophosphate/cytidine monophosphate kinase) (UMP/CMP kinase) (UMP/CMPK) | Cmpk1 (Cmk) (Cmpk) (Uck) (Umk) (Umpk) | 107 | 93  | 12 | 9  |
| Q3TXS7 | 26S proteasome non-ATPase regulatory subunit 1 (26S proteasome regulatory subunit RPN2) (26S proteasome regulatory subunit S1)                                                                                             | Psmd1                                 | 100 | 89  | 16 | 12 |
| P62751 | 60S ribosomal protein L23a                                                                                                                                                                                                 | Rpl23a                                | 75  | 49  | 16 | 12 |
| Q8K1F9 | Lactase-like protein (Klotho/lactase-phlorizin hydrolase-related protein)                                                                                                                                                  | Lctl (Klph)                           | 27  | 21  | 24 | 18 |
| Q9D8V0 | Minor histocompatibility antigen H13 (EC 3.4.23.-) (Signal peptide peptidase) (Presenilin-like protein 3)                                                                                                                  | Hm13 (H13) (Psl3)                     | 23  | 29  | 28 | 21 |
| Q8R5F3 | Uncharacterized protein C6orf130 homolog                                                                                                                                                                                   |                                       | 64  | 29  | 31 | 23 |
| P25444 | 40S ribosomal protein S2 (S4) (LLRep3 protein)                                                                                                                                                                             | Rps2 (Llrep3) (Rps4)                  | 217 | 50  | 26 | 19 |
| Q80TS7 | Dendrin                                                                                                                                                                                                                    | Ddn (Gm748) (Kiaa0749)                | 31  | 24  | 11 | 8  |
| Q91Z67 | SLIT-ROBO Rho GTPase-activating protein 2 (srGAP2) (Formin-binding protein 2) (Formin-binding protein 27) (FBP-27)                                                                                                         | Srgap2 (Fbp27) (Fbnp2)                | 77  | 48  | 11 | 8  |
| Q61696 | Heat shock 70 kDa protein 1A (Heat shock 70 kDa protein 3) (HSP70.3) (Hsp68)                                                                                                                                               | Hspa1a (Hsp70-3) (Hsp70A1)            | 266 | 236 | 33 | 24 |
| Q60673 | Receptor-type tyrosine-protein phosphatase-like N (R-PTP-N) (PTP IA-2)                                                                                                                                                     | Ptprn (Ptp35)                         | 30  | 18  | 14 | 10 |
| P17751 | Triosephosphate isomerase (TIM) (EC 5.3.1.1) (Triose-phosphate isomerase)                                                                                                                                                  | Tpi1 (Tpi)                            | 706 | 519 | 35 | 25 |

|        |                                                                                                                                                                                                                          |                             |      |     |     |    |
|--------|--------------------------------------------------------------------------------------------------------------------------------------------------------------------------------------------------------------------------|-----------------------------|------|-----|-----|----|
| Q8BMJ2 | Leucyl-tRNA synthetase, cytoplasmic (EC 6.1.1.4) (Leucine--tRNA ligase) (LeuRS)                                                                                                                                          | Lars                        | 52   | 45  | 47  | 33 |
| Q91YJ5 | Translation initiation factor IF-2, mitochondrial (IF-2Mt) (IF2(mt)) (IF-2(Mt))                                                                                                                                          | Mtif2                       | 29   | 23  | 13  | 9  |
| Q9QYC1 | Pecanex-like protein 1 (Pecanex homolog)                                                                                                                                                                                 | Pcnx (Kiaa0805) (Pcnx1)     | 26   | 21  | 25  | 17 |
| O88799 | Zonadhesin                                                                                                                                                                                                               | Zan                         | 22   | 26  | 25  | 17 |
| P29391 | Ferritin light chain 1 (Ferritin L subunit 1)                                                                                                                                                                            | Ftl1 (Ftl) (Ftl-1)          | 150  | 159 | 6   | 4  |
| P61979 | Heterogeneous nuclear ribonucleoprotein K (hnRNP K)                                                                                                                                                                      | Hnrnpk (Hnrpk)              | 225  | 46  | 18  | 12 |
| Q9Z0T6 | Polycystic kidney disease and receptor for egg jelly-related protein (PKD and REJ homolog)                                                                                                                               | Pkdrej                      | 32   | 32  | 18  | 12 |
| Q3UXZ6 | Protein FAM81A                                                                                                                                                                                                           | Fam81a                      | 22   | 27  | 13  | 8  |
| P62301 | 40S ribosomal protein S13                                                                                                                                                                                                | Rps13                       | 77   | 100 | 23  | 14 |
| O08709 | Peroxiredoxin-6 (EC 1.11.1.15) (Antioxidant protein 2) (1-Cys peroxiredoxin) (1-Cys PRX) (Acidic calcium-independent phospholipase A2) (aiPLA2) (EC 3.1.1.-) (Non-selenium glutathione peroxidase) (NSGPx) (EC 1.11.1.7) | Prdx6 (Aop2) (Ltw4) (Prdx5) | 56   | 29  | 5   | 3  |
| O88291 | Zinc finger protein 326 (Zinc finger protein-associated with nuclear matrix of 75 kDa)                                                                                                                                   | Znf326 (Zan75) (Zfp326)     | 41   | 55  | 5   | 3  |
| P63038 | 60 kDa heat shock protein, mitochondrial (Heat shock protein 60) (HSP-60) (Hsp60) (60 kDa chaperonin) (Chaperonin 60) (CPN60) (Mitochondrial matrix protein P1) (HSP-65)                                                 | Hspd1 (Hsp60)               | 15   | 32  | 22  | 13 |
| P63017 | Heat shock cognate 71 kDa protein (Heat shock 70 kDa protein 8)                                                                                                                                                          | Hspa8 (Hsc70) (Hsc73)       | 1719 | 959 | 119 | 70 |
| P62900 | 60S ribosomal protein L31                                                                                                                                                                                                | Rpl31                       | 124  | 62  | 12  | 7  |
| P26043 | Radixin (ESP10)                                                                                                                                                                                                          | Rdx                         | 127  | 106 | 23  | 13 |

|                   |        |                                                                                                                                                  |                      |      |      |     |     |
|-------------------|--------|--------------------------------------------------------------------------------------------------------------------------------------------------|----------------------|------|------|-----|-----|
|                   | P49722 | Proteasome subunit alpha type-2 (EC 3.4.25.1) (Proteasome component C3) (Macropain subunit C3) (Multicatalytic endopeptidase complex subunit C3) | Psma2 (Lmpc3)        | 188  | 103  | 16  | 9   |
|                   | Q9Z1Q5 | Chloride intracellular channel protein 1 (Nuclear chloride ion channel 27) (NCC27)                                                               | Clic1                | 137  | 139  | 9   | 5   |
|                   | Q64105 | Sepiapterin reductase (SPR) (EC 1.1.1.153)                                                                                                       | Spr                  | 43   | 27   | 9   | 5   |
|                   | Q61390 | T-complex protein 1 subunit zeta-2 (TCP-1-zeta-2) (CCT-zeta-2) (Cctz-2)                                                                          | Cct6b                | 55   | 52   | 15  | 8   |
|                   | P97351 | 40S ribosomal protein S3a                                                                                                                        | Rps3a                | 899  | 392  | 50  | 26  |
| Other transporter | Q9Z1R2 | Large proline-rich protein BAT3 (HLA-B-associated transcript 3)                                                                                  | Bat3                 | 80   | 49   | 15  | 26  |
|                   | Q8BHG1 | Nardilysin (EC 3.4.24.61) (N-arginine dibasic convertase) (NRD convertase) (NRD-C)                                                               | Nrd1                 | 53   | 54   | 13  | 21  |
|                   | P63158 | High mobility group protein B1 (High mobility group protein 1) (HMG-1)                                                                           | Hmgb1 (Hmg-1) (Hmg1) | 153  | 405  | 25  | 38  |
|                   | Q62522 | Zona pellucida-binding protein 1 (Sp38)                                                                                                          | Zpbp (Zpbp1)         | 38   | 42   | 8   | 12  |
|                   | Q9WVP9 | Interferon-induced GTP-binding protein Mx2 (Myxovirus resistance protein 2)                                                                      | Mx2                  | 32   | 22   | 14  | 20  |
|                   | Q9EPL8 | Importin-7 (Imp7) (Ran-binding protein 7) (RanBP7)                                                                                               | Ipo7 (Ranbp7)        | 25   | 121  | 9   | 12  |
|                   | Q9ERU9 | E3 SUMO-protein ligase RanBP2 (Ran-binding protein 2)                                                                                            | Ranbp2               | 56   | 49   | 40  | 53  |
|                   | P70168 | Importin subunit beta-1 (Karyopherin subunit beta-1) (Nuclear factor P97) (Pore targeting complex 97 kDa subunit) (PTAC97) (SCG)                 | Kpnb1 (Impnb)        | 48   | 17   | 13  | 17  |
|                   | Q921C5 | Protein bicaudal D homolog 2 (Bic-D 2)                                                                                                           | Bicd2 (Kiaa0699)     | 31   | 23   | 26  | 34  |
|                   | P20152 | Vimentin                                                                                                                                         | Vim                  | 1749 | 2397 | 125 | 157 |
|                   | P17183 | Gamma-enolase (EC 4.2.1.11) (2-phospho-D-glycerate hydro-lyase) (Neural enolase) (Neuron-specific enolase) (NSE) (Enolase 2)                     | Eno2 (Eno-2)         | 228  | 181  | 12  | 15  |

|        |                                                                                                                                                                                                       |                                                   |      |      |    |    |
|--------|-------------------------------------------------------------------------------------------------------------------------------------------------------------------------------------------------------|---------------------------------------------------|------|------|----|----|
| P31001 | Desmin                                                                                                                                                                                                | Des                                               | 169  | 224  | 25 | 31 |
| Q8BGD9 | Eukaryotic translation initiation factor 4B (eIF-4B)                                                                                                                                                  | Eif4b                                             | 238  | 306  | 13 | 16 |
| O08648 | Mitogen-activated protein kinase kinase kinase 4 (EC 2.7.11.25) (MAPK/ERK kinase kinase 4) (MEK kinase 4) (MEKK 4)                                                                                    | Map3k4 (Mekk4)                                    | 37   | 16   | 19 | 23 |
| Q9R0K7 | Plasma membrane calcium-transporting ATPase 2 (PMCA2) (EC 3.6.3.8) (Plasma membrane calcium ATPase isoform 2) (Plasma membrane calcium pump isoform 2)                                                | Atp2b2 (Pmca2)                                    | 32   | 27   | 70 | 83 |
| P55200 | Histone-lysine N-methyltransferase HRX (EC 2.1.1.43) (Zinc finger protein HRX) (ALL-1)                                                                                                                | Mll (All1) (Hrx) (Mll1)                           | 67   | 26   | 39 | 44 |
| Q62446 | FK506-binding protein 3 (EC 5.2.1.8) (Peptidyl-prolyl cis-trans isomerase) (PPIase) (Rotamase) (25 kDa FKBP) (FKBP-25) (Rapamycin-selective 25 kDa immunophilin)                                      | Fkbp3 (Fkbp25)                                    | 31   | 31   | 10 | 11 |
| Q99KK9 | Probable histidyl-tRNA synthetase, mitochondrial (EC 6.1.1.21) (Histidine--tRNA ligase) (HisRS) (Histidine--tRNA ligase-like)                                                                         | Hars2 (Harsl)                                     | 20   | 41   | 22 | 24 |
| Q8BKX6 | Serine/threonine-protein kinase SMG1 (SMG-1) (EC 2.7.11.1)                                                                                                                                            | Smg1 (Kiaa0421)                                   | 33   | 27   | 30 | 32 |
| P16858 | Glyceraldehyde-3-phosphate dehydrogenase (GAPDH) (EC 1.2.1.12)                                                                                                                                        | Gapdh (Gapd)                                      | 1514 | 1781 | 84 | 89 |
| Q6P4S8 | Integrator complex subunit 1 (Int1)                                                                                                                                                                   | Ints1                                             | 25   | 33   | 26 | 27 |
| Q60865 | Caprin-1 (Cytoplasmic activation- and proliferation-associated protein 1) (GPI-anchored membrane protein 1) (GPI-anchored protein p137) (p137GPI) (Membrane component chromosome 11 surface marker 1) | Caprin1 (Gpiap) (Gpiap1) (Gpip137) (M11s1) (G5E5) | 20   | 26   | 5  | 5  |

|        |                                                                                                                                                                                                        |                           |     |     |    |    |
|--------|--------------------------------------------------------------------------------------------------------------------------------------------------------------------------------------------------------|---------------------------|-----|-----|----|----|
| P30416 | FK506-binding protein 4 (EC 5.2.1.8) (Peptidyl-prolyl cis-trans isomerase) (PPIase) (Rotamase) (HSP-binding immunophilin) (HBI) (FKBP52 protein) (52 kDa FK506-binding protein) (FKBP59) (p59 protein) | Fkbp4                     | 40  | 62  | 8  | 8  |
| Q8BGQ7 | Alanyl-tRNA synthetase, cytoplasmic (EC 6.1.1.7) (Alanine--tRNA ligase) (AlaRS)                                                                                                                        | Aars                      | 179 | 216 | 23 | 22 |
| P03966 | N-myc proto-oncogene protein                                                                                                                                                                           | Mycn (Nmyc) (Nmyc1)       | 65  | 46  | 18 | 17 |
| P35969 | Vascular endothelial growth factor receptor 1 (VEGFR-1) (EC 2.7.10.1) (Tyrosine-protein kinase receptor FLT) (FLT-1) (Embryonic receptor kinase 2)                                                     | Flt1 (Emrk2) (Flt)        | 29  | 36  | 35 | 32 |
| P07310 | Creatine kinase M-type (EC 2.7.3.2) (Creatine kinase M chain) (M-CK)                                                                                                                                   | Ckm (Ckmm)                | 73  | 107 | 31 | 28 |
| Q924C1 | Exportin-5 (Exp5) (Ran-binding protein 21)                                                                                                                                                             | Xpo5 (Kiaa1291) (Ranbp21) | 20  | 62  | 15 | 13 |
| P21550 | Beta-enolase (EC 4.2.1.11) (2-phospho-D-glycerate hydro-lyase) (Muscle-specific enolase) (MSE) (Skeletal muscle enolase) (Enolase 3)                                                                   | Eno3 (Eno-3)              | 313 | 146 | 30 | 26 |
| Q9JJK8 | Serine/threonine-protein kinase ATR (EC 2.7.11.1) (Ataxia telangiectasia and Rad3-related protein)                                                                                                     | Atr                       | 20  | 25  | 72 | 62 |
| Q921E2 | Ras-related protein Rab-31                                                                                                                                                                             | Rab31                     | 18  | 29  | 7  | 6  |
| Q91VW5 | Golgin subfamily A member 4 (tGolgin-1)                                                                                                                                                                | Golga4                    | 41  | 60  | 46 | 39 |
| P14131 | 40S ribosomal protein S16                                                                                                                                                                              | Rps16                     | 160 | 126 | 19 | 16 |
| Q91XQ0 | Dynein heavy chain 8, axonemal (Axonemal beta dynein heavy chain 8) (Ciliary dynein heavy chain 8)                                                                                                     | Dnahc8                    | 47  | 51  | 77 | 64 |
| Q6DFV7 | Nuclear receptor coactivator 7                                                                                                                                                                         | Ncoa7                     | 25  | 16  | 11 | 9  |
| Q8BHS8 | Syntabulin (Syntaxin-1-binding protein) (Golgi-localized syntaphilin-related protein) (m-Golsyn)                                                                                                       | Sybu (Golsyn) (Kiaa1472)  | 32  | 19  | 17 | 13 |



|        |                                                                                                                                                                                                                                                                                                        |                                    |     |     |    |    |
|--------|--------------------------------------------------------------------------------------------------------------------------------------------------------------------------------------------------------------------------------------------------------------------------------------------------------|------------------------------------|-----|-----|----|----|
| Q569Z6 | Thyroid hormone receptor-associated protein 3 (Thyroid hormone receptor-associated protein complex 150 kDa component) (Trap150)                                                                                                                                                                        | Thrap3 (Trap150)                   | 29  | 48  | 21 | 16 |
| Q99MY8 | Probable histone-lysine N-methyltransferase ASH1L (EC 2.1.1.43) (Absent small and homeotic disks protein 1 homolog) (ASH1-like protein)                                                                                                                                                                | Ash1l                              | 19  | 31  | 46 | 35 |
| P56480 | ATP synthase subunit beta, mitochondrial (EC 3.6.3.14)                                                                                                                                                                                                                                                 | Atp5b                              | 31  | 50  | 8  | 6  |
| Q920E5 | Farnesyl pyrophosphate synthetase (FPP synthetase) (FPS) (Farnesyl diphosphate synthetase) (Cholesterol-regulated 39 kDa protein) (CR 39) [Includes: Dimethylallyltransferase (EC 2.5.1.1); Geranyltransferase (EC 2.5.1.10)]                                                                          | Fdps                               | 107 | 43  | 17 | 12 |
| Q9WV07 | Epidermis-type lipoxygenase 3 (e-LOX-3) (EC 1.13.11.-)                                                                                                                                                                                                                                                 | Aloxe3                             | 25  | 22  | 9  | 6  |
| Q61983 | Sodium-dependent phosphate transport protein 1 (Sodium/phosphate cotransporter 1) (Na(+)/PI cotransporter 1) (Solute carrier family 17 member 1) (Renal sodium-dependent phosphate transport protein 1) (Renal sodium-phosphate transport protein 1) (Renal Na(+)-dependent phosphate cotransporter 1) | Slc17a1 (Npt1)                     | 31  | 33  | 8  | 5  |
| P17156 | Heat shock-related 70 kDa protein 2 (Heat shock protein 70.2)                                                                                                                                                                                                                                          | Hspa2 (Hcp70.2) (Hsp70-2)          | 964 | 544 | 60 | 37 |
| O35551 | Rab GTPase-binding effector protein 1 (Rabaptin-5) (Rabaptin-5alpha)                                                                                                                                                                                                                                   | Rabep1 (Rab5ep) (Rabpt5) (Rabpt5a) | 33  | 26  | 26 | 16 |

|                               |        |                                                                                                                                                     |                                                                                                                                                 |     |      |    |    |
|-------------------------------|--------|-----------------------------------------------------------------------------------------------------------------------------------------------------|-------------------------------------------------------------------------------------------------------------------------------------------------|-----|------|----|----|
|                               | P05532 | Mast/stem cell growth factor receptor (SCFR) (EC 2.7.10.1) (Proto-oncogene tyrosine-protein kinase Kit) (c-kit) (CD antigen CD117)                  | Kit (SI)                                                                                                                                        | 16  | 35   | 12 | 7  |
| Translation initiation factor | Q3TCT4 | Ectonucleoside triphosphate diphosphohydrolase 7 (NTPDase 7) (EC 3.6.1.-) (Lysosomal apyrase-like protein 1)                                        | Entpd7 (Kiaa4066) (Lalp1)                                                                                                                       | 16  | 33   | 42 | 80 |
|                               | P17742 | Peptidyl-prolyl cis-trans isomerase A (PPIase A) (Rotamase A) (EC 5.2.1.8) (Cyclophilin A) (Cyclosporin A-binding protein) (SP18)                   | Ppia                                                                                                                                            | 855 | 1549 | 38 | 66 |
|                               | Q8R1S0 | Ubiquinone biosynthesis monooxygenase COQ6 (EC 1.14.13.-)                                                                                           | Coq6                                                                                                                                            | 42  | 92   | 10 | 17 |
|                               | P62806 | Histone H4                                                                                                                                          | Hist1h4a; Hist1h4b (H4-53); Hist1h4c (H4-12); Hist1h4d; Hist1h4f; Hist1h4h; Hist1h4i; Hist1h4j; Hist1h4k; Hist1h4m; Hist2h4a (Hist2h4); Hist4h4 | 815 | 1617 | 47 | 78 |
|                               | Q6ZWX6 | Eukaryotic translation initiation factor 2 subunit 1 (Eukaryotic translation initiation factor 2 subunit alpha) (eIF-2-alpha) (EIF-2alpha) (EIF-2A) | Eif2s1 (Eif2a)                                                                                                                                  | 27  | 177  | 7  | 11 |
|                               | O55142 | 60S ribosomal protein L35a                                                                                                                          | Rpl35a                                                                                                                                          | 24  | 50   | 4  | 6  |
|                               | Q9Z1F9 | SUMO-activating enzyme subunit 2 (EC 6.3.2.-) (Ubiquitin-like 1-activating enzyme E1B) (Anthracycline-associated resistance ARX)                    | Uba2 (Sae2) (Uble1b)                                                                                                                            | 62  | 77   | 10 | 14 |

|        |                                                                                                                                                                                                         |                                             |      |      |     |     |
|--------|---------------------------------------------------------------------------------------------------------------------------------------------------------------------------------------------------------|---------------------------------------------|------|------|-----|-----|
| Q921C5 | Protein bicaudal D homolog 2 (Bic-D 2)                                                                                                                                                                  | Bicd2<br>(Kiaa0699)                         | 31   | 23   | 26  | 34  |
| Q8CIM1 | Leucine-rich repeat-containing protein 45                                                                                                                                                               | Lrrc45                                      | 33   | 71   | 27  | 35  |
| Q91YK0 | Leucine-rich repeat-containing protein 49<br>(Tubulin polyglutamylase complex subunit 4)<br>(PGs4) (p79)                                                                                                | Lrrc49                                      | 27   | 27   | 18  | 23  |
| P05064 | Fructose-bisphosphate aldolase A (EC<br>4.1.2.13) (Muscle-type aldolase) (Aldolase 1)                                                                                                                   | Aldoa (Aldo1)                               | 211  | 567  | 36  | 46  |
| O70456 | 14-3-3 protein sigma (Stratifin)                                                                                                                                                                        | Sfn (Mkrn3)                                 | 573  | 666  | 56  | 71  |
| Q80X50 | Ubiquitin-associated protein 2-like                                                                                                                                                                     | Ubap2l                                      | 63   | 54   | 4   | 5   |
| Q60716 | Prolyl 4-hydroxylase subunit alpha-2 (EC<br>1.14.11.2) (4-PH alpha-2) (Procollagen-<br>proline,2-oxoglutarate-4-dioxygenase subunit<br>alpha-2)                                                         | P4ha2                                       | 22   | 27   | 8   | 10  |
| Q8R2X8 | Golgin-45 (Basic leucine zipper nuclear factor<br>1)                                                                                                                                                    | Blzf1                                       | 28   | 22   | 13  | 16  |
| Q8BGD9 | Eukaryotic translation initiation factor 4B (eIF-<br>4B)                                                                                                                                                | Eif4b                                       | 238  | 306  | 13  | 16  |
| Q5SPW0 | Vacuolar protein sorting-associated protein 54<br>(Tumor antigen SLP-8p homolog)                                                                                                                        | Vps54                                       | 36   | 28   | 13  | 15  |
| Q9WUF3 | CASP8-associated protein 2 (FLICE-<br>associated huge protein)                                                                                                                                          | Casp8ap2<br>(Flash)                         | 28   | 16   | 26  | 29  |
| Q9R0Q7 | Prostaglandin E synthase 3 (EC 5.3.99.3)<br>(Cytosolic prostaglandin E2 synthase)<br>(cPGES) (Telomerase-binding protein p23)<br>(Hsp90 co-chaperone) (Progesterone receptor<br>complex p23) (Sid 3177) | Ptges3<br>(Sid3177)<br>(Tebp)               | 124  | 239  | 10  | 11  |
| P49717 | DNA replication licensing factor MCM4<br>(CDC21 homolog) (P1-CDC21)                                                                                                                                     | Mcm4 (Cdc21)<br>(Mcmd4)                     | 29   | 18   | 11  | 12  |
| P07901 | Heat shock protein HSP 90-alpha (HSP 86)<br>(Tumor-specific transplantation 86 kDa<br>antigen) (TSTA)                                                                                                   | Hsp90aa1<br>(Hsp86)<br>(Hsp86-1)<br>(Hspca) | 1529 | 2324 | 134 | 146 |
| P62242 | 40S ribosomal protein S8                                                                                                                                                                                | Rps8                                        | 479  | 372  | 18  | 19  |

|        |                                                                                                                                                                                                   |                               |     |     |    |    |
|--------|---------------------------------------------------------------------------------------------------------------------------------------------------------------------------------------------------|-------------------------------|-----|-----|----|----|
| O35973 | Period circadian protein homolog 1 (Circadian clock protein PERIOD 1) (Circadian pacemaker protein Rigui) (mPER1)                                                                                 | Per1 (Per) (Rigui)            | 29  | 21  | 27 | 28 |
| P62141 | Serine/threonine-protein phosphatase PP1-beta catalytic subunit (PP-1B) (EC 3.1.3.16)                                                                                                             | Ppp1cb                        | 177 | 57  | 4  | 4  |
| P30681 | High mobility group protein B2 (High mobility group protein 2) (HMG-2)                                                                                                                            | Hmgb2 (Hmg2)                  | 94  | 222 | 24 | 24 |
| P23116 | Eukaryotic translation initiation factor 3 subunit A (eIF3a) (Eukaryotic translation initiation factor 3 subunit 10) (eIF-3-theta) (eIF3 p167) (eIF3 p180) (eIF3 p185) (p162) (Centrosomin)       | Eif3a (CsmA) (Eif3) (Eif3s10) | 199 | 166 | 58 | 56 |
| Q8R1B4 | Eukaryotic translation initiation factor 3 subunit C (eIF3c) (Eukaryotic translation initiation factor 3 subunit 8) (eIF3 p110)                                                                   | Eif3c (Eif3s8)                | 34  | 63  | 22 | 21 |
| Q99PF4 | Cadherin-23 (Otocadherin)                                                                                                                                                                         | Cdh23                         | 29  | 32  | 29 | 27 |
| Q9D868 | Peptidyl-prolyl cis-trans isomerase H (PPlase H) (Rotamase H) (EC 5.2.1.8)                                                                                                                        | Ppih                          | 55  | 31  | 7  | 6  |
| Q9CYF5 | Williams-Beuren syndrome chromosomal region 16 protein homolog                                                                                                                                    | Wbscr16                       | 38  | 28  | 7  | 6  |
| Q91VW5 | Golgin subfamily A member 4 (tGolgin-1)                                                                                                                                                           | Golga4                        | 41  | 60  | 46 | 39 |
| Q9R0L6 | Pericentriolar material 1 protein (PCM-1) (mPCM-1)                                                                                                                                                | Pcm1                          | 24  | 30  | 19 | 16 |
| Q9ES17 | Interleukin-21 (IL-21)                                                                                                                                                                            | Il21                          | 22  | 25  | 6  | 5  |
| P46664 | Adenylosuccinate synthetase isozyme 2 (AMPSase 2) (AdSS 2) (EC 6.3.4.4) (Adenylosuccinate synthetase, non-muscle isozyme) (Adenylosuccinate synthetase, acidic isozyme) (IMP--aspartate ligase 2) | Adss (Adss2)                  | 36  | 66  | 12 | 10 |
| Q91XQ0 | Dynein heavy chain 8, axonemal (Axonemal beta dynein heavy chain 8) (Ciliary dynein heavy chain 8)                                                                                                | Dnahc8                        | 47  | 51  | 77 | 64 |

|        |                                                                                                                                                                                                                                 |                                          |      |     |    |    |
|--------|---------------------------------------------------------------------------------------------------------------------------------------------------------------------------------------------------------------------------------|------------------------------------------|------|-----|----|----|
| Q6ZQ38 | Cullin-associated NEDD8-dissociated protein 1 (Cullin-associated and neddylation-dissociated protein 1) (p120 CAND1)                                                                                                            | Cand1 (D10Ert516e) (Kiaa0829)            | 221  | 246 | 33 | 27 |
| Q9Z1M8 | Protein Red (Protein RER) (IK factor) (Cytokine IK)                                                                                                                                                                             | Ik (Red) (Rer)                           | 29   | 23  | 10 | 8  |
| Q8C196 | Carbamoyl-phosphate synthase [ammonia], mitochondrial (EC 6.3.4.16) (Carbamoyl-phosphate synthetase I) (CPSase I)                                                                                                               | Cps1                                     | 22   | 25  | 19 | 15 |
| P62754 | 40S ribosomal protein S6 (Phosphoprotein NP33)                                                                                                                                                                                  | Rps6                                     | 127  | 283 | 19 | 15 |
| P63325 | 40S ribosomal protein S10                                                                                                                                                                                                       | Rps10                                    | 468  | 168 | 42 | 33 |
| P06151 | L-lactate dehydrogenase A chain (LDH-A) (EC 1.1.1.27) (LDH muscle subunit) (LDH-M)                                                                                                                                              | Ldha (Ldh-1) (Ldh1)                      | 1033 | 421 | 74 | 57 |
| P56480 | ATP synthase subunit beta, mitochondrial (EC 3.6.3.14)                                                                                                                                                                          | Atp5b                                    | 31   | 50  | 8  | 6  |
| Q02956 | Protein kinase C zeta type (EC 2.7.11.13) (nPKC-zeta)                                                                                                                                                                           | Prkcz (PkcZ)                             | 29   | 15  | 8  | 6  |
| P25444 | 40S ribosomal protein S2 (S4) (LLRep3 protein)                                                                                                                                                                                  | Rps2 (Llrep3) (Rps4)                     | 217  | 50  | 26 | 19 |
| Q91YJ5 | Translation initiation factor IF-2, mitochondrial (IF-2Mt) (IF2(mt)) (IF-2(Mt))                                                                                                                                                 | Mtif2                                    | 29   | 23  | 13 | 9  |
| Q64707 | U2 small nuclear ribonucleoprotein auxiliary factor 35 kDa subunit-related protein 1 (U2(RNU2) small nuclear RNA auxiliary factor 1-like 1) (CCCH type zinc finger, RNA-binding motif and serine/arginine rich protein 1) (SP2) | Zrsr1 (Sp2) (Sp2-7) (U2af1rs1) (U2af111) | 34   | 22  | 13 | 9  |
| P61979 | Heterogeneous nuclear ribonucleoprotein K (hnRNP K)                                                                                                                                                                             | Hnrnpk (Hnrpk)                           | 225  | 46  | 18 | 12 |
| O35551 | Rab GTPase-binding effector protein 1 (Rabaptin-5) (Rabaptin-5alpha)                                                                                                                                                            | Rabep1 (Rab5ep) (Rabpt5) (Rabpt5a)       | 33   | 26  | 26 | 16 |

|                   |        |                                                                                                                                                                                                                                                                                                                    |                                  |      |     |     |    |
|-------------------|--------|--------------------------------------------------------------------------------------------------------------------------------------------------------------------------------------------------------------------------------------------------------------------------------------------------------------------|----------------------------------|------|-----|-----|----|
|                   | Q6NZJ6 | Eukaryotic translation initiation factor 4 gamma 1 (eIF-4-gamma 1) (eIF-4G 1) (eIF-4G1)                                                                                                                                                                                                                            | Eif4g1                           | 47   | 113 | 30  | 18 |
|                   | P26040 | Ezrin (p81) (Cytovillin) (Villin-2)                                                                                                                                                                                                                                                                                | Ezr (Vil2)                       | 127  | 106 | 27  | 16 |
|                   | P80317 | T-complex protein 1 subunit zeta (TCP-1-zeta) (CCT-zeta) (CCT-zeta-1)                                                                                                                                                                                                                                              | Cct6a (Cct6) (Cctz) (Cctz1)      | 160  | 52  | 22  | 13 |
|                   | P10630 | Eukaryotic initiation factor 4A-II (eIF-4A-II) (eIF4A-II) (EC 3.6.1.-) (ATP-dependent RNA helicase eIF4A-2)                                                                                                                                                                                                        | Eif4a2 (Ddx2b)                   | 194  | 78  | 17  | 10 |
|                   | P63017 | Heat shock cognate 71 kDa protein (Heat shock 70 kDa protein 8)                                                                                                                                                                                                                                                    | Hspa8 (Hsc70) (Hsc73)            | 1719 | 959 | 119 | 70 |
|                   | P63073 | Eukaryotic translation initiation factor 4E (eIF-4E) (eIF4E) (mRNA cap-binding protein) (eIF-4F 25 kDa subunit)                                                                                                                                                                                                    | Eif4e                            | 110  | 25  | 9   | 5  |
| Ribosomal protein | Q99N50 | Synaptotagmin-like protein 2 (Exophilin-4)                                                                                                                                                                                                                                                                         | Syt2 (Slp2)                      | 26   | 77  | 10  | 18 |
|                   | P35980 | 60S ribosomal protein L18                                                                                                                                                                                                                                                                                          | Rpl18                            | 32   | 22  | 51  | 85 |
|                   | P62082 | 40S ribosomal protein S7                                                                                                                                                                                                                                                                                           | Rps7                             | 104  | 126 | 9   | 14 |
|                   | O55142 | 60S ribosomal protein L35a                                                                                                                                                                                                                                                                                         | Rpl35a                           | 24   | 50  | 4   | 6  |
|                   | Q9D1H6 | Protein HRPAP20 (Hormone-regulated proliferation-associated protein of 20 kDa homolog)                                                                                                                                                                                                                             | Hrpap20                          | 70   | 38  | 6   | 9  |
|                   | P17183 | Gamma-enolase (EC 4.2.1.11) (2-phospho-D-glycerate hydro-lyase) (Neural enolase) (Neuron-specific enolase) (NSE) (Enolase 2)                                                                                                                                                                                       | Eno2 (Eno-2)                     | 228  | 181 | 12  | 15 |
|                   | Q9QWY8 | 130 kDa phosphatidylinositol 4,5-biphosphate-dependent ARF1 GTPase-activating protein (PIP2-dependent ARF1 GAP) (ADP-ribosylation factor-directed GTPase-activating protein 1) (ARF GTPase-activating protein 1) (Development and differentiation-enhancing factor 1) (Differentiation-enhancing factor 1) (DEF-1) | Ddef1 (Asap1) (Kiaa1249) (Shag1) | 26   | 23  | 14  | 16 |
|                   | P62270 | 40S ribosomal protein S18 (Ke-3) (Ke3)                                                                                                                                                                                                                                                                             | Rps18                            | 210  | 209 | 15  | 17 |

|        |                                                                                                                                                                                                                                                                                                                                                                                                                                                                         |                            |      |      |     |     |
|--------|-------------------------------------------------------------------------------------------------------------------------------------------------------------------------------------------------------------------------------------------------------------------------------------------------------------------------------------------------------------------------------------------------------------------------------------------------------------------------|----------------------------|------|------|-----|-----|
| P62908 | 40S ribosomal protein S3                                                                                                                                                                                                                                                                                                                                                                                                                                                | Rps3                       | 778  | 762  | 39  | 44  |
| P19253 | 60S ribosomal protein L13a (Transplantation antigen P198) (Tum-P198 antigen)                                                                                                                                                                                                                                                                                                                                                                                            | Rpl13a (P198) (Tstap198-7) | 27   | 65   | 9   | 10  |
| P16858 | Glyceraldehyde-3-phosphate dehydrogenase (GAPDH) (EC 1.2.1.12)                                                                                                                                                                                                                                                                                                                                                                                                          | Gapdh (Gapd)               | 1514 | 1781 | 84  | 89  |
| P62242 | 40S ribosomal protein S8                                                                                                                                                                                                                                                                                                                                                                                                                                                | Rps8                       | 479  | 372  | 18  | 19  |
| P62281 | 40S ribosomal protein S11                                                                                                                                                                                                                                                                                                                                                                                                                                               | Rps11                      | 166  | 132  | 27  | 28  |
| Q9CPR4 | 60S ribosomal protein L17                                                                                                                                                                                                                                                                                                                                                                                                                                               | Rpl17                      | 187  | 135  | 15  | 14  |
| Q01853 | Transitional endoplasmic reticulum ATPase (TER ATPase) (15S Mg(2+)-ATPase p97 subunit) (Valosin-containing protein) (VCP)                                                                                                                                                                                                                                                                                                                                               | Vcp                        | 691  | 699  | 56  | 51  |
| P67984 | 60S ribosomal protein L22 (Heparin-binding protein HBp15)                                                                                                                                                                                                                                                                                                                                                                                                               | Rpl22                      | 59   | 48   | 7   | 6   |
| P35979 | 60S ribosomal protein L12                                                                                                                                                                                                                                                                                                                                                                                                                                               | Rpl12                      | 208  | 389  | 14  | 12  |
| Q9CZM2 | 60S ribosomal protein L15                                                                                                                                                                                                                                                                                                                                                                                                                                               | Rpl15                      | 225  | 107  | 21  | 18  |
| Q6ZWN5 | 40S ribosomal protein S9                                                                                                                                                                                                                                                                                                                                                                                                                                                | Rps9                       | 459  | 248  | 47  | 40  |
| P14131 | 40S ribosomal protein S16                                                                                                                                                                                                                                                                                                                                                                                                                                               | Rps16                      | 160  | 126  | 19  | 16  |
| Q9ES17 | Interleukin-21 (IL-21)                                                                                                                                                                                                                                                                                                                                                                                                                                                  | Il21                       | 22   | 25   | 6   | 5   |
| P19096 | Fatty acid synthase (EC 2.3.1.85) [Includes: [Acyl-carrier-protein] S-acetyltransferase (EC 2.3.1.38); [Acyl-carrier-protein] S-malonyltransferase (EC 2.3.1.39); 3-oxoacyl-[acyl-carrier-protein] synthase (EC 2.3.1.41); 3-oxoacyl-[acyl-carrier-protein] reductase (EC 1.1.1.100); 3-hydroxypalmitoyl-[acyl-carrier-protein] dehydratase (EC 4.2.1.61); Enoyl-[acyl-carrier-protein] reductase (EC 1.3.1.10); Oleoyl [acyl-carrier-protein] hydrolase (EC 3.1.2.14)] | Fasn                       | 1869 | 1524 | 163 | 135 |
| P14206 | 40S ribosomal protein SA (Laminin receptor 1) (p40) (34/67 kDa laminin receptor) (37 kDa oncofetal antigen) (OFA/iLRP)                                                                                                                                                                                                                                                                                                                                                  | Rpsa (Lamr1) (P40-8)       | 131  | 112  | 11  | 9   |

|        |                                                                                                                                                                                        |                                                   |     |     |    |    |
|--------|----------------------------------------------------------------------------------------------------------------------------------------------------------------------------------------|---------------------------------------------------|-----|-----|----|----|
| Q64512 | Tyrosine-protein phosphatase non-receptor type 13 (EC 3.1.3.48) (Protein tyrosine phosphatase PTP-BL) (Protein-tyrosine phosphatase RIP) (Protein tyrosine phosphatase DPZPTP) (PTP36) | Ptpn13 (Ptp14)                                    | 28  | 27  | 26 | 21 |
| P17182 | Alpha-enolase (EC 4.2.1.11) (2-phospho-D-glycerate hydro-lyase) (Non-neural enolase) (NNE) (Enolase 1)                                                                                 | Eno1 (Eno-1)                                      | 976 | 802 | 62 | 50 |
| P12970 | 60S ribosomal protein L7a (Surfeit locus protein 3)                                                                                                                                    | Rpl7a (Surf-3) (Surf3)                            | 111 | 31  | 15 | 12 |
| P62852 | 40S ribosomal protein S25                                                                                                                                                              | Rps25                                             | 101 | 100 | 15 | 12 |
| Q8BP67 | 60S ribosomal protein L24                                                                                                                                                              | Rpl24                                             | 354 | 214 | 24 | 19 |
| P62754 | 40S ribosomal protein S6 (Phosphoprotein NP33)                                                                                                                                         | Rps6                                              | 127 | 283 | 19 | 15 |
| P63325 | 40S ribosomal protein S10                                                                                                                                                              | Rps10                                             | 468 | 168 | 42 | 33 |
| P62702 | 40S ribosomal protein S4, X isoform                                                                                                                                                    | Rps4x (Rps4)                                      | 402 | 304 | 30 | 23 |
| P97434 | Myosin phosphatase Rho-interacting protein (Rho-interacting protein 3) (RIP3) (p116Rip)                                                                                                | Mrip (Kiaa0864) (Mrip) (Rhoip3)                   | 35  | 23  | 25 | 19 |
| O70228 | Probable phospholipid-transporting ATPase IIA (EC 3.6.3.1) (ATPase class II type 9A)                                                                                                   | Atp9a                                             | 31  | 29  | 37 | 28 |
| P62751 | 60S ribosomal protein L23a                                                                                                                                                             | Rpl23a                                            | 75  | 49  | 16 | 12 |
| Q8CDN8 | Coiled-coil domain-containing protein 38                                                                                                                                               | Ccdc38                                            | 45  | 95  | 15 | 11 |
| P62264 | 40S ribosomal protein S14                                                                                                                                                              | Rps14                                             | 163 | 166 | 15 | 11 |
| P25444 | 40S ribosomal protein S2 (S4) (LLRep3 protein)                                                                                                                                         | Rps2 (Llrep3) (Rps4)                              | 217 | 50  | 26 | 19 |
| P62991 | Ubiquitin                                                                                                                                                                              | Rps27a (Uba80) (Ubcep1); Uba52 (Ubcep2); Ubb; Ubc | 61  | 54  | 11 | 8  |
| Q9CR57 | 60S ribosomal protein L14                                                                                                                                                              | Rpl14                                             | 508 | 391 | 33 | 24 |
| P27659 | 60S ribosomal protein L3 (J1 protein)                                                                                                                                                  | Rpl3                                              | 192 | 75  | 25 | 18 |
| P14148 | 60S ribosomal protein L7                                                                                                                                                               | Rpl7                                              | 145 | 52  | 14 | 10 |



|                                    |        |                                                                                                                                       |                    |     |      |    |     |
|------------------------------------|--------|---------------------------------------------------------------------------------------------------------------------------------------|--------------------|-----|------|----|-----|
|                                    | P14869 | 60S acidic ribosomal protein P0 (L10E)                                                                                                | Rplp0 (Arbp)       | 115 | 334  | 28 | 20  |
|                                    | P51410 | 60S ribosomal protein L9                                                                                                              | Rpl9               | 187 | 212  | 17 | 12  |
|                                    | Q8BMJ2 | Leucyl-tRNA synthetase, cytoplasmic (EC 6.1.1.4) (Leucine--tRNA ligase) (LeuRS)                                                       | Lars               | 52  | 45   | 47 | 33  |
|                                    | Q9CXW4 | 60S ribosomal protein L11                                                                                                             | Rpl11              | 72  | 79   | 11 | 7   |
|                                    | P62717 | 60S ribosomal protein L18a                                                                                                            | Rpl18a             | 242 | 62   | 21 | 13  |
|                                    | P84099 | 60S ribosomal protein L19                                                                                                             | Rpl19              | 39  | 47   | 13 | 8   |
|                                    | P62301 | 40S ribosomal protein S13                                                                                                             | Rps13              | 77  | 100  | 23 | 14  |
|                                    | O35344 | Importin subunit alpha-3 (Karyopherin subunit alpha-3) (Importin alpha Q2) (Qip2)                                                     | Kpna3 (Qip2)       | 24  | 28   | 10 | 6   |
|                                    | Q9D1R9 | 60S ribosomal protein L34                                                                                                             | Rpl34              | 34  | 32   | 10 | 6   |
|                                    | P62900 | 60S ribosomal protein L31                                                                                                             | Rpl31              | 124 | 62   | 12 | 7   |
|                                    | P41105 | 60S ribosomal protein L28                                                                                                             | Rpl28              | 49  | 41   | 19 | 11  |
|                                    | Q9CZX8 | 40S ribosomal protein S19                                                                                                             | Rps19              | 206 | 146  | 19 | 11  |
|                                    | P47963 | 60S ribosomal protein L13 (A52)                                                                                                       | Rpl13              | 744 | 379  | 47 | 27  |
|                                    | P97461 | 40S ribosomal protein S5                                                                                                              | Rps5               | 89  | 33   | 32 | 18  |
|                                    | P97351 | 40S ribosomal protein S3a                                                                                                             | Rps3a              | 899 | 392  | 50 | 26  |
| Actin binding cytoskeletal protein | Q8BTM8 | Filamin-A (Alpha-filamin) (Filamin-1) (Endothelial actin-binding protein) (Actin-binding protein 280) (ABP-280) (Non-muscle filamin)  | Flna (Fln) (Fln1)  | 254 | 1031 | 46 | 86  |
|                                    | P06745 | Glucose-6-phosphate isomerase (GPI) (EC 5.3.1.9) (Phosphoglucose isomerase) (PGI) (Phosphohexose isomerase) (PHI) (Neuroleukin) (NLK) | Gpi (Gpi1)         | 39  | 107  | 12 | 22  |
|                                    | P56716 | Oxygen-regulated protein 1 (Retinitis pigmentosa RP1 protein homolog)                                                                 | Rp1 (Orp1) (Rp1h)  | 31  | 49   | 58 | 104 |
|                                    | P62962 | Profilin-1 (Profilin I)                                                                                                               | Pfn1               | 30  | 93   | 4  | 7   |
|                                    | P18760 | Cofilin-1 (Cofilin, non-muscle isoform)                                                                                               | Cfl1               | 959 | 2552 | 70 | 122 |
|                                    | Q64475 | Histone H2B type 1-B (h2B-143)                                                                                                        | Hist1h2bb          | 436 | 999  | 46 | 75  |
|                                    | Q9D8W5 | 26S proteasome non-ATPase regulatory subunit 12 (26S proteasome regulatory subunit p55)                                               | Psm12              | 67  | 78   | 7  | 11  |
|                                    | Q8VHX6 | Filamin-C (Gamma-filamin) (Filamin-2) (FLN-C) (Actin-binding-like protein) (ABP-L) (ABP-280-like protein)                             | Flnc (Abpl) (Fln2) | 33  | 115  | 18 | 25  |

|        |                                                                                                                                                                                                                             |                           |      |      |     |     |
|--------|-----------------------------------------------------------------------------------------------------------------------------------------------------------------------------------------------------------------------------|---------------------------|------|------|-----|-----|
| P17047 | Lysosome-associated membrane glycoprotein 2 (LAMP-2) (Lysosomal membrane glycoprotein type B) (LGP-B) (CD107 antigen-like family member B) (CD antigen CD107b)                                                              | Lamp2 (Lamp-2)            | 26   | 29   | 8   | 11  |
| Q9Z277 | Bromodomain adjacent to zinc finger domain protein 1B (Williams-Beuren syndrome chromosomal region 9 protein homolog) (WBRS9)                                                                                               | Baz1b (Wbscr9)            | 43   | 17   | 26  | 34  |
| Q8CIM1 | Leucine-rich repeat-containing protein 45                                                                                                                                                                                   | Lrrc45                    | 33   | 71   | 27  | 35  |
| P47753 | F-actin-capping protein subunit alpha-1 (CapZ alpha-1)                                                                                                                                                                      | Capza1 (Cappa1)           | 60   | 33   | 7   | 9   |
| Q80X90 | Filamin-B (FLN-B) (Beta-filamin) (Actin-binding like protein) (ABP-280-like protein)                                                                                                                                        | Flnb                      | 63   | 279  | 32  | 41  |
| P20152 | Vimentin                                                                                                                                                                                                                    | Vim                       | 1749 | 2397 | 125 | 157 |
| Q61466 | SWI/SNF-related matrix-associated actin-dependent regulator of chromatin subfamily D member 1 (SWI/SNF complex 60 kDa subunit) (60 kDa BRG-1/Brm-associated factor subunit A) (BRG1-associated factor 60A) (D15KZ1 protein) | Smarcd1 (Baf60a) (D15Kz1) | 27   | 29   | 13  | 16  |
| P47754 | F-actin-capping protein subunit alpha-2 (CapZ alpha-2)                                                                                                                                                                      | Capza2 (Cappa2)           | 60   | 33   | 5   | 6   |
| Q8BFY9 | Transportin-1 (Importin beta-2) (Karyopherin beta-2)                                                                                                                                                                        | Tnp1 (Kpnb2)              | 54   | 43   | 10  | 12  |
| Q9WUM4 | Coronin-1C (Coronin-3)                                                                                                                                                                                                      | Coro1c                    | 42   | 28   | 18  | 21  |
| Q62418 | Drebrin-like protein (SH3 domain-containing protein 7) (Actin-binding protein 1)                                                                                                                                            | Dbn1 (Abp1) (Sh3p7)       | 24   | 39   | 7   | 8   |
| Q93092 | Transaldolase (EC 2.2.1.2)                                                                                                                                                                                                  | Taldo1 (Tal) (Taldo)      | 20   | 93   | 10  | 11  |
| Q9D8N0 | Elongation factor 1-gamma (EF-1-gamma) (eEF-1B gamma)                                                                                                                                                                       | Eef1g                     | 31   | 85   | 11  | 12  |
| Q3THS6 | S-adenosylmethionine synthetase isoform type 2 (AdoMet synthetase 2) (EC 2.5.1.6) (Methionine adenosyltransferase 2)                                                                                                        | Mat2a                     | 26   | 42   | 11  | 12  |

|        |                                                                                                                                                                                                                     |                                         |     |     |     |     |
|--------|---------------------------------------------------------------------------------------------------------------------------------------------------------------------------------------------------------------------|-----------------------------------------|-----|-----|-----|-----|
| P16546 | Spectrin alpha chain, brain (Spectrin, non-erythroid alpha chain) (Alpha-II spectrin) (Fodrin alpha chain)                                                                                                          | Sptan1 (Spna2) (Spta2)                  | 68  | 86  | 66  | 69  |
| P26039 | Talin-1                                                                                                                                                                                                             | Tln1 (Tln)                              | 123 | 161 | 41  | 42  |
| Q8BSS9 | Liprin-alpha-2 (Protein tyrosine phosphatase receptor type f polypeptide-interacting protein alpha-2) (PTPRF-interacting protein alpha-2)                                                                           | Ppfia2                                  | 36  | 21  | 22  | 22  |
| Q62261 | Spectrin beta chain, brain 1 (Spectrin, non-erythroid beta chain 1) (Beta-II spectrin) (Fodrin beta chain) (Embryonic liver fodrin)                                                                                 | Sptbn1 (Elf) (Sptnb-2) (Sptnb2) (Sptb2) | 56  | 54  | 48  | 48  |
| P45591 | Cofilin-2 (Cofilin, muscle isoform)                                                                                                                                                                                 | Cfl2                                    | 528 | 431 | 39  | 38  |
| O08638 | Myosin-11 (Myosin heavy chain 11) (Myosin heavy chain, smooth muscle isoform) (SMMHC)                                                                                                                               | Myh11                                   | 211 | 221 | 79  | 76  |
| P03995 | Glial fibrillary acidic protein (GFAP)                                                                                                                                                                              | Gfap                                    | 63  | 90  | 22  | 20  |
| Q8VDD5 | Myosin-9 (Myosin heavy chain 9) (Myosin heavy chain, non-muscle IIa) (Non-muscle myosin heavy chain IIa) (NMMHC II-a) (NMMHC-IIA) (Cellular myosin heavy chain, type A) (Non-muscle myosin heavy chain-A) (NMMHC-A) | Myh9                                    | 780 | 839 | 127 | 115 |
| Q91VX2 | Ubiquitin-associated protein 2 (Protein lingerer homolog 1) (MLig-1)                                                                                                                                                | Ubap2 (Lig1)                            | 60  | 41  | 10  | 9   |
| P26041 | Moesin (Membrane-organizing extension spike protein)                                                                                                                                                                | Msn                                     | 136 | 127 | 44  | 39  |
| Q99104 | Myosin-Va (Dilute myosin heavy chain, non-muscle)                                                                                                                                                                   | Myo5a (Dilute)                          | 28  | 34  | 35  | 31  |
| Q9R0P5 | Destrin (Actin-depolymerizing factor) (ADF) (Sid 23)                                                                                                                                                                | Dstn (Dsn) (Sid23)                      | 61  | 81  | 8   | 7   |
| Q8CJ27 | Abnormal spindle-like microcephaly-associated protein homolog (Spindle and hydroxyurea checkpoint abnormal protein) (Calmodulin-binding protein Sha1) (Calmodulin binding protein 1)                                | Aspm (Calmbp1) (Sha1)                   | 35  | 23  | 55  | 48  |

|        |                                                                                                                                      |                                        |      |      |     |     |
|--------|--------------------------------------------------------------------------------------------------------------------------------------|----------------------------------------|------|------|-----|-----|
| P21550 | Beta-enolase (EC 4.2.1.11) (2-phospho-D-glycerate hydro-lyase) (Muscle-specific enolase) (MSE) (Skeletal muscle enolase) (Enolase 3) | Eno3 (Eno-3)                           | 313  | 146  | 30  | 26  |
| Q9CYF5 | Williams-Beuren syndrome chromosomal region 16 protein homolog                                                                       | Wbscr16                                | 38   | 28   | 7   | 6   |
| Q91VW5 | Golgin subfamily A member 4 (tGolgin-1)                                                                                              | Golga4                                 | 41   | 60   | 46  | 39  |
| P11531 | Dystrophin                                                                                                                           | Dmd                                    | 25   | 16   | 66  | 55  |
| Q91XQ0 | Dynein heavy chain 8, axonemal (Axonemal beta dynein heavy chain 8) (Ciliary dynein heavy chain 8)                                   | Dnahc8                                 | 47   | 51   | 77  | 64  |
| Q6URW6 | Myosin-14 (Myosin heavy chain 14) (Myosin heavy chain, non-muscle IIc) (Non-muscle myosin heavy chain IIc) (NMHC II-C)               | Myh14                                  | 60   | 48   | 53  | 44  |
| Q6DFV7 | Nuclear receptor coactivator 7                                                                                                       | Ncoa7                                  | 25   | 16   | 11  | 9   |
| Q9JHU4 | Cytoplasmic dynein 1 heavy chain 1 (Cytoplasmic dynein heavy chain 1) (Dynein heavy chain, cytosolic)                                | Dync1h1 (Dhc1) (Dnch1) (Dnchc1) (Dyhc) | 822  | 395  | 157 | 123 |
| P97434 | Myosin phosphatase Rho-interacting protein (Rho-interacting protein 3) (RIP3) (p116Rip)                                              | Mrip (Kiaa0864) (Mrip) (Rhoip3)        | 35   | 23   | 25  | 19  |
| Q9D8V0 | Minor histocompatibility antigen H13 (EC 3.4.23.-) (Signal peptide peptidase) (Presenilin-like protein 3)                            | Hm13 (H13) (Psl3)                      | 23   | 29   | 28  | 21  |
| P60710 | Actin, cytoplasmic 1 (Beta-actin)                                                                                                    | Actb                                   | 5140 | 4496 | 282 | 208 |
| Q80TS7 | Dendrin                                                                                                                              | Ddn (Gm748) (Kiaa0749)                 | 31   | 24   | 11  | 8   |
| Q99LG2 | Transportin-2 (Karyopherin beta-2b)                                                                                                  | Tnpo2                                  | 42   | 32   | 7   | 5   |
| Q8K4L3 | Supervillin (Archvillin) (p205/p250)                                                                                                 | Svil                                   | 25   | 22   | 18  | 12  |
| P61164 | Alpha-centractin (Centractin) (Centrosome-associated actin homolog) (Actin-RPV) (ARP1)                                               | Actr1a (Ctrn1)                         | 247  | 124  | 27  | 18  |

|                             |        |                                                                                                                                                                                                                       |                      |      |      |     |     |
|-----------------------------|--------|-----------------------------------------------------------------------------------------------------------------------------------------------------------------------------------------------------------------------|----------------------|------|------|-----|-----|
|                             | P68033 | Actin, alpha cardiac muscle 1 (Alpha-cardiac actin)                                                                                                                                                                   | Actc1 (Actc)         | 3948 | 2726 | 234 | 155 |
|                             | P61161 | Actin-related protein 2 (Actin-like protein 2)                                                                                                                                                                        | Actr2 (Arp2)         | 247  | 124  | 28  | 18  |
|                             | Q8BGR5 | Protein FAM53B                                                                                                                                                                                                        | Fam53b               | 47   | 41   | 19  | 12  |
|                             | Q61879 | Myosin-10 (Myosin heavy chain 10) (Myosin heavy chain, non-muscle IIb) (Non-muscle myosin heavy chain IIb) (NMMHC II-b) (NMMHC-IIB) (Cellular myosin heavy chain, type B) (Non-muscle myosin heavy chain-B) (NMMHC-B) | Myh10                | 122  | 101  | 65  | 40  |
|                             | Q9Z0P5 | Twinfilin-2 (Twinfilin-1-like protein) (A6-related protein) (mA6RP)                                                                                                                                                   | Twf2 (Ptk9l)         | 29   | 32   | 10  | 6   |
|                             | P26040 | Ezrin (p81) (Cytovillin) (Villin-2)                                                                                                                                                                                   | Ezr (Vil2)           | 127  | 106  | 27  | 16  |
|                             | P47757 | F-actin-capping protein subunit beta (CapZ beta)                                                                                                                                                                      | Capzb (Cappb1)       | 107  | 68   | 7   | 4   |
|                             | P26043 | Radixin (ESP10)                                                                                                                                                                                                       | Rdx                  | 127  | 106  | 23  | 13  |
| Other cell junction protein | P28271 | Cytoplasmic aconitate hydratase (Aconitase) (EC 4.2.1.3) (Citrate hydro-lyase) (Iron-responsive element-binding protein 1) (IRE-BP 1) (Iron regulatory protein 1) (IRP1)                                              | Aco1 (Ireb1) (Irebp) | 77   | 122  | 147 | 184 |
|                             | Q00342 | FL cytokine receptor (EC 2.7.10.1) (Tyrosine-protein kinase receptor flk-2) (Fetal liver kinase 2) (Tyrosine-protein kinase FLT3) (CD antigen CD135)                                                                  | Flt3 (Flk-2) (Flt3)  | 17   | 34   | 7   | 10  |
|                             | O35711 | Liprin-beta-2 (Protein tyrosine phosphatase receptor type f polypeptide-interacting protein-binding protein 2) (PTPRF-interacting protein-binding protein 2) (Coiled-coil-like protein 1)                             | Ppfibp2 (Cclp1)      | 108  | 79   | 14  | 20  |
|                             | Q63ZW7 | InaD-like protein (Inadl protein) (Pals1-associated tight junction protein) (Protein associated to tight junctions) (Channel-interacting PDZ domain-containing protein)                                               | Inadl (Cipp) (Patj)  | 18   | 30   | 12  | 15  |
|                             | Q9JKP5 | Muscleblind-like protein 1 (Triplet-expansion RNA-binding protein)                                                                                                                                                    | Mbnl1 (Exp) (Mbnl)   | 45   | 63   | 244 | 281 |

|                     |        |                                                                                                                                           |                       |      |      |     |     |
|---------------------|--------|-------------------------------------------------------------------------------------------------------------------------------------------|-----------------------|------|------|-----|-----|
|                     | Q9WUF3 | CASP8-associated protein 2 (FLICE-associated huge protein)                                                                                | Casp8ap2 (Flash)      | 28   | 16   | 26  | 29  |
|                     | P26618 | Alpha-type platelet-derived growth factor receptor (EC 2.7.10.1) (PDGF-R-alpha) (CD140 antigen-like family member A) (CD antigen CD140a)  | Pdgfra                | 37   | 73   | 160 | 178 |
|                     | Q8BKC5 | Importin-5 (Imp5) (Importin subunit beta-3) (Karyopherin beta-3) (Ran-binding protein 5) (RanBP5)                                         | Ipo5 (Kpnb3) (Ranbp5) | 185  | 91   | 12  | 13  |
|                     | Q8BSS9 | Liprin-alpha-2 (Protein tyrosine phosphatase receptor type f polypeptide-interacting protein alpha-2) (PTPRF-interacting protein alpha-2) | Ppfia2                | 36   | 21   | 22  | 22  |
|                     | O35206 | Collagen alpha-1(XV) chain [Cleaved into: Endostatin (Endostatin-XV)]                                                                     | Col15a1               | 31   | 37   | 12  | 11  |
|                     | Q9CZM2 | 60S ribosomal protein L15                                                                                                                 | Rpl15                 | 225  | 107  | 21  | 18  |
|                     | Q8VBX6 | Multiple PDZ domain protein (Multi-PDZ domain protein 1)                                                                                  | Mpdz (Mupp1)          | 17   | 29   | 38  | 28  |
|                     | P26040 | Ezrin (p81) (Cytovillin) (Villin-2)                                                                                                       | Ezr (Vil2)            | 127  | 106  | 27  | 16  |
|                     | P63017 | Heat shock cognate 71 kDa protein (Heat shock 70 kDa protein 8)                                                                           | Hspa8 (Hsc70) (Hsc73) | 1719 | 959  | 119 | 70  |
|                     | Q9WV89 | Syntaxin-binding protein 4 (Syntaxin 4-interacting protein) (Synip) (STX4-interacting protein)                                            | Stxbp4                | 41   | 19   | 11  | 6   |
| Exoribonuclea<br>se | P56716 | Oxygen-regulated protein 1 (Retinitis pigmentosa RP1 protein homolog)                                                                     | Rp1 (Orp1) (Rp1h)     | 31   | 49   | 58  | 104 |
|                     | P17742 | Peptidyl-prolyl cis-trans isomerase A (PPIase A) (Rotamase A) (EC 5.2.1.8) (Cyclophilin A) (Cyclosporin A-binding protein) (SP18)         | Ppia                  | 855  | 1549 | 38  | 66  |
|                     | P62082 | 40S ribosomal protein S7                                                                                                                  | Rps7                  | 104  | 126  | 9   | 14  |
|                     | P35761 | Dual specificity protein kinase TTK (ESK) (PYT) (EC 2.7.12.1)                                                                             | Ttk (Esk)             | 14   | 34   | 9   | 13  |

|        |                                                                                                                                                                                                       |                                                   |     |     |    |    |
|--------|-------------------------------------------------------------------------------------------------------------------------------------------------------------------------------------------------------|---------------------------------------------------|-----|-----|----|----|
| Q9R1P0 | Proteasome subunit alpha type-4 (EC 3.4.25.1) (Proteasome component C9) (Macropain subunit C9) (Multicatalytic endopeptidase complex subunit C9) (Proteasome subunit L)                               | Psma4                                             | 29  | 151 | 14 | 17 |
| P62270 | 40S ribosomal protein S18 (Ke-3) (Ke3)                                                                                                                                                                | Rps18                                             | 210 | 209 | 15 | 17 |
| P62908 | 40S ribosomal protein S3                                                                                                                                                                              | Rps3                                              | 778 | 762 | 39 | 44 |
| P62242 | 40S ribosomal protein S8                                                                                                                                                                              | Rps8                                              | 479 | 372 | 18 | 19 |
| P62281 | 40S ribosomal protein S11                                                                                                                                                                             | Rps11                                             | 166 | 132 | 27 | 28 |
| Q60865 | Caprin-1 (Cytoplasmic activation- and proliferation-associated protein 1) (GPI-anchored membrane protein 1) (GPI-anchored protein p137) (p137GPI) (Membrane component chromosome 11 surface marker 1) | Caprin1 (Gpiap) (Gpiap1) (Gpip137) (M11s1) (G5E5) | 20  | 26  | 5  | 5  |
| Q80YV4 | Pantothenate kinase 4 (EC 2.7.1.33) (Pantothenic acid kinase 4) (mPanK4)                                                                                                                              | Pank4                                             | 23  | 28  | 13 | 13 |
| Q8R5G7 | Centaurin-delta-3 (Cnt-d3) (Arf-GAP, Rho-GAP, ankyrin repeat and pleckstrin homology domain-containing protein 3) (Dual specificity Rho- and Arf-GTPase-activating protein 1)                         | Centd3 (Arap3) (Drag1) (Kiaa4097)                 | 21  | 27  | 26 | 24 |
| Q9DBJ1 | Phosphoglycerate mutase 1 (EC 5.4.2.1) (EC 5.4.2.4) (EC 3.1.3.13) (Phosphoglycerate mutase isozyme B) (PGAM-B) (BPG-dependent PGAM 1)                                                                 | Pgam1                                             | 612 | 746 | 35 | 31 |
| Q6ZWN5 | 40S ribosomal protein S9                                                                                                                                                                              | Rps9                                              | 459 | 248 | 47 | 40 |
| P14131 | 40S ribosomal protein S16                                                                                                                                                                             | Rps16                                             | 160 | 126 | 19 | 16 |
| P62852 | 40S ribosomal protein S25                                                                                                                                                                             | Rps25                                             | 101 | 100 | 15 | 12 |
| Q80T14 | Extracellular matrix protein FRAS1                                                                                                                                                                    | Fras1 (Kiaa1500)                                  | 48  | 109 | 24 | 19 |
| P62754 | 40S ribosomal protein S6 (Phosphoprotein NP33)                                                                                                                                                        | Rps6                                              | 127 | 283 | 19 | 15 |
| P63325 | 40S ribosomal protein S10                                                                                                                                                                             | Rps10                                             | 468 | 168 | 42 | 33 |
| P62702 | 40S ribosomal protein S4, X isoform                                                                                                                                                                   | Rps4x (Rps4)                                      | 402 | 304 | 30 | 23 |

|                           |        |                                                                                                                                            |                                                   |     |     |    |     |
|---------------------------|--------|--------------------------------------------------------------------------------------------------------------------------------------------|---------------------------------------------------|-----|-----|----|-----|
|                           | Q99MY8 | Probable histone-lysine N-methyltransferase ASH1L (EC 2.1.1.43) (Absent small and homeotic disks protein 1 homolog) (ASH1-like protein)    | Ash1l                                             | 19  | 31  | 46 | 35  |
|                           | P62264 | 40S ribosomal protein S14                                                                                                                  | Rps14                                             | 163 | 166 | 15 | 11  |
|                           | P25444 | 40S ribosomal protein S2 (S4) (LLRep3 protein)                                                                                             | Rps2 (Llrep3) (Rps4)                              | 217 | 50  | 26 | 19  |
|                           | P62991 | Ubiquitin                                                                                                                                  | Rps27a (Uba80) (Ubcep1); Uba52 (Ubcep2); Ubb; Ubc | 61  | 54  | 11 | 8   |
|                           | Q80TP3 | E3 ubiquitin-protein ligase UBR5 (EC 6.3.2.-) (E3 ubiquitin-protein ligase, HECT domain-containing 1) (Hyperplastic discs protein homolog) | Ubr5 (Edd) (Edd1) (Kiaa0896)                      | 27  | 17  | 43 | 29  |
|                           | P62301 | 40S ribosomal protein S13                                                                                                                  | Rps13                                             | 77  | 100 | 23 | 14  |
|                           | Q9CZX8 | 40S ribosomal protein S19                                                                                                                  | Rps19                                             | 206 | 146 | 19 | 11  |
|                           | P97461 | 40S ribosomal protein S5                                                                                                                   | Rps5                                              | 89  | 33  | 32 | 18  |
|                           | P11103 | Poly [ADP-ribose] polymerase 1 (PARP-1) (EC 2.4.2.30) (ADPRT) (NAD(+) ADP-ribosyltransferase 1) (Poly[ADP-ribose] synthetase 1) (msPARP)   | Parp1 (Adprp) (Adprt) (Adprt1)                    | 21  | 26  | 17 | 9   |
|                           | P97351 | 40S ribosomal protein S3a                                                                                                                  | Rps3a                                             | 899 | 392 | 50 | 26  |
| Serine protease inhibitor | O88705 | Potassium/sodium hyperpolarization-activated cyclic nucleotide-gated channel 3 (Hyperpolarization-activated cation channel 3) (HAC-3)      | Hcn3 (Hac3)                                       | 75  | 67  | 8  | 15  |
|                           | P56716 | Oxygen-regulated protein 1 (Retinitis pigmentosa RP1 protein homolog)                                                                      | Rp1 (Orp1) (Rp1h)                                 | 31  | 49  | 58 | 104 |



|        |                                                                                                                                                                   |                                                                                                                                                                               |     |      |    |    |
|--------|-------------------------------------------------------------------------------------------------------------------------------------------------------------------|-------------------------------------------------------------------------------------------------------------------------------------------------------------------------------|-----|------|----|----|
| P62806 | Histone H4                                                                                                                                                        | Hist1h4a;<br>Hist1h4b (H4-53); Hist1h4c (H4-12);<br>Hist1h4d;<br>Hist1h4f;<br>Hist1h4h;<br>Hist1h4i;<br>Hist1h4j;<br>Hist1h4k;<br>Hist1h4m;<br>Hist2h4a (Hist2h4);<br>Hist4h4 | 815 | 1617 | 47 | 78 |
| Q8BHG1 | Nardilysin (EC 3.4.24.61) (N-arginine dibasic convertase) (NRD convertase) (NRD-C)                                                                                | Nrd1                                                                                                                                                                          | 53  | 54   | 13 | 21 |
| Q8VDM4 | 26S proteasome non-ATPase regulatory subunit 2 (26S proteasome regulatory subunit RPN1) (26S proteasome regulatory subunit S2) (26S proteasome subunit p97)       | Psm2                                                                                                                                                                          | 113 | 157  | 18 | 29 |
| Q61990 | Poly(rC)-binding protein 2 (Alpha-CP2) (Putative heterogeneous nuclear ribonucleoprotein X) (hnRNP X) (CTBP) (CBP)                                                | Pcbp2 (Cbp) (HnrnpX) (Hnrpx)                                                                                                                                                  | 29  | 194  | 7  | 11 |
| Q9D8W5 | 26S proteasome non-ATPase regulatory subunit 12 (26S proteasome regulatory subunit p55)                                                                           | Psm12                                                                                                                                                                         | 67  | 78   | 7  | 11 |
| P62082 | 40S ribosomal protein S7                                                                                                                                          | Rps7                                                                                                                                                                          | 104 | 126  | 9  | 14 |
| Q3UDW8 | Heparan-alpha-glucosaminide N-acetyltransferase (EC 2.3.1.78) (Transmembrane protein 76)                                                                          | Hgsnat (D8Erd354e) (Tmem76)                                                                                                                                                   | 34  | 22   | 6  | 9  |
| P16045 | Galectin-1 (Lectin galactoside-binding soluble 1) (Beta-galactoside-binding lectin L-14-l) (Lactose-binding lectin 1) (S-Lac lectin 1) (Galaptin) (14 kDa lectin) | Lgals1 (Gbp)                                                                                                                                                                  | 79  | 85   | 6  | 9  |

|        |                                                                                                                                                                                           |                     |      |      |    |     |
|--------|-------------------------------------------------------------------------------------------------------------------------------------------------------------------------------------------|---------------------|------|------|----|-----|
| Q9CQY5 | Magnesium transporter protein 1 (MagT1) (Implantation-associated protein) (IAP)                                                                                                           | Magt1 (Iag2)        | 26   | 22   | 8  | 12  |
| Q99K85 | Phosphoserine aminotransferase (PSAT) (EC 2.6.1.52) (Phosphohydroxythreonine aminotransferase) (Endometrial progesterone-induced protein) (EPIP)                                          | Psat1 (Psa) (Psat)  | 162  | 541  | 16 | 24  |
| P53657 | Pyruvate kinase isozymes R/L (EC 2.7.1.40) (L PK)                                                                                                                                         | Pklr                | 144  | 270  | 26 | 38  |
| P99026 | Proteasome subunit beta type-4 (Proteasome beta chain) (EC 3.4.25.1) (Macropain beta chain) (Multicatalytic endopeptidase complex beta chain) (Proteasome chain 3)                        | Psmb4 (Lmp3)        | 93   | 289  | 11 | 16  |
| Q00342 | FL cytokine receptor (EC 2.7.10.1) (Tyrosine-protein kinase receptor flk-2) (Fetal liver kinase 2) (Tyrosine-protein kinase FLT3) (CD antigen CD135)                                      | Flt3 (Flk-2) (Flt3) | 17   | 34   | 7  | 10  |
| O35711 | Liprin-beta-2 (Protein tyrosine phosphatase receptor type f polypeptide-interacting protein-binding protein 2) (PTPRF-interacting protein-binding protein 2) (Coiled-coil-like protein 1) | Ppfibp2 (Cclp1)     | 108  | 79   | 14 | 20  |
| P70696 | Histone H2B type 1-A (Histone H2B, testis) (Testis-specific histone H2B)                                                                                                                  | Hist1h2ba (Th2b)    | 146  | 378  | 37 | 51  |
| Q640P2 | Angiopoietin-related protein 1 (Angiopoietin-like 1)                                                                                                                                      | Angptl1             | 55   | 41   | 21 | 28  |
| P70168 | Importin subunit beta-1 (Karyopherin subunit beta-1) (Nuclear factor P97) (Pore targeting complex 97 kDa subunit) (PTAC97) (SCG)                                                          | Kpnb1 (Impnb)       | 48   | 17   | 13 | 17  |
| Q61753 | D-3-phosphoglycerate dehydrogenase (3-PGDH) (EC 1.1.1.95) (A10)                                                                                                                           | Phgdh               | 105  | 158  | 14 | 18  |
| P63101 | 14-3-3 protein zeta/delta (Protein kinase C inhibitor protein 1) (KCIP-1) (SEZ-2)                                                                                                         | Ywhaz               | 1383 | 1947 | 96 | 120 |
| Q8VII8 | Mineralocorticoid receptor (MR) (Nuclear receptor subfamily 3 group C member 2)                                                                                                           | Nr3c2 (Mlr)         | 28   | 22   | 18 | 22  |

|        |                                                                                                                                                                                                    |                            |     |     |    |    |
|--------|----------------------------------------------------------------------------------------------------------------------------------------------------------------------------------------------------|----------------------------|-----|-----|----|----|
| Q9R1P0 | Proteasome subunit alpha type-4 (EC 3.4.25.1) (Proteasome component C9) (Macropain subunit C9) (Multicatalytic endopeptidase complex subunit C9) (Proteasome subunit L)                            | Psma4                      | 29  | 151 | 14 | 17 |
| P54227 | Stathmin (Phosphoprotein p19) (pp19) (Leukemia-associated phosphoprotein p18) (Oncoprotein 18) (Op18) (pp17) (Prosolin) (Metablastin) (Protein Pr22) (Leukemia-associated gene protein)            | Stmn1 (Lag) (Lap18) (Pr22) | 121 | 120 | 10 | 12 |
| Q9QUR6 | Prolyl endopeptidase (PE) (EC 3.4.21.26) (Post-proline cleaving enzyme)                                                                                                                            | Prep (Pep)                 | 56  | 20  | 15 | 18 |
| P80315 | T-complex protein 1 subunit delta (TCP-1-delta) (CCT-delta) (A45)                                                                                                                                  | Cct4 (Cctd)                | 61  | 59  | 15 | 18 |
| O08908 | Phosphatidylinositol 3-kinase regulatory subunit beta (PI3-kinase p85 subunit beta) (PtdIns-3-kinase p85-beta)                                                                                     | Pik3r2                     | 19  | 25  | 20 | 24 |
| P54103 | DnaJ homolog subfamily C member 2 (Zuotin-related factor 1) (Mouse Id associate 1) (MIDA1)                                                                                                         | Dnajc2 (Mida1) (Zrf1)      | 23  | 27  | 11 | 13 |
| Q91ZT5 | FYVE, RhoGEF and PH domain-containing protein 4 (Actin filament-binding protein frabin) (FGD1-related F-actin-binding protein)                                                                     | Fgd4                       | 29  | 19  | 10 | 11 |
| O55234 | Proteasome subunit beta type-5 (EC 3.4.25.1) (Proteasome epsilon chain) (Macropain epsilon chain) (Multicatalytic endopeptidase complex epsilon chain) (Proteasome subunit X) (Proteasome chain 6) | Psmb5                      | 168 | 227 | 10 | 11 |
| Q8BKC5 | Importin-5 (Imp5) (Importin subunit beta-3) (Karyopherin beta-3) (Ran-binding protein 5) (RanBP5)                                                                                                  | Ipo5 (Kpnb3) (Ranbp5)      | 185 | 91  | 12 | 13 |
| P62242 | 40S ribosomal protein S8                                                                                                                                                                           | Rps8                       | 479 | 372 | 18 | 19 |

|        |                                                                                                                                                                                                              |                                        |     |     |    |    |
|--------|--------------------------------------------------------------------------------------------------------------------------------------------------------------------------------------------------------------|----------------------------------------|-----|-----|----|----|
| Q9R1P1 | Proteasome subunit beta type-3 (EC 3.4.25.1) (Proteasome theta chain) (Proteasome chain 13) (Proteasome component C10-II)                                                                                    | Psmb3                                  | 87  | 135 | 7  | 7  |
| Q9R190 | Metastasis-associated protein MTA2 (Metastasis-associated 1-like 1)                                                                                                                                          | Mta2 (Mta111)                          | 27  | 26  | 9  | 9  |
| O09061 | Proteasome subunit beta type-1 (EC 3.4.25.1) (Proteasome component C5) (Macropain subunit C5) (Multicatalytic endopeptidase complex subunit C5) (Proteasome gamma chain)                                     | Psmb1                                  | 84  | 94  | 11 | 11 |
| Q9WV80 | Sorting nexin-1                                                                                                                                                                                              | Snx1                                   | 23  | 49  | 11 | 11 |
| Q9DB77 | Cytochrome b-c1 complex subunit 2, mitochondrial (Ubiquinol-cytochrome-c reductase complex core protein 2) (Core protein II) (Complex III subunit 2)                                                         | Uqcrc2                                 | 29  | 20  | 13 | 13 |
| Q9JIF7 | Coatomer subunit beta (Beta-coat protein) (Beta-COP)                                                                                                                                                         | Copb1 (Copb)                           | 37  | 22  | 15 | 15 |
| Q8BSS9 | Liprin-alpha-2 (Protein tyrosine phosphatase receptor type f polypeptide-interacting protein alpha-2) (PTPRF-interacting protein alpha-2)                                                                    | Ppfia2                                 | 36  | 21  | 22 | 22 |
| Q80UK8 | Integrator complex subunit 2 (Int2)                                                                                                                                                                          | Ints2 (Kiaa1287)                       | 16  | 27  | 24 | 24 |
| Q8K4E0 | Alstrom syndrome protein 1 homolog                                                                                                                                                                           | Alms1 (Kiaa0328)                       | 29  | 30  | 86 | 86 |
| Q8R4B8 | NACHT, LRR and PYD domains-containing protein 3 (Cold autoinflammatory syndrome 1 protein homolog) (Cryopyrin) (PYRIN-containing APAF1-like protein 1) (Mast cell maturation-associated-inducible protein 1) | Nlrp3 (Cias1) (Mmig1) (Nalp3) (Pypaf1) | 30  | 20  | 24 | 23 |
| Q8BGQ7 | Alanyl-tRNA synthetase, cytoplasmic (EC 6.1.1.7) (Alanine--tRNA ligase) (AlaRS)                                                                                                                              | Aars                                   | 179 | 216 | 23 | 22 |

|        |                                                                                                                                                                                                                                                      |                              |     |     |    |    |
|--------|------------------------------------------------------------------------------------------------------------------------------------------------------------------------------------------------------------------------------------------------------|------------------------------|-----|-----|----|----|
| P54869 | Hydroxymethylglutaryl-CoA synthase, mitochondrial (HMG-CoA synthase) (EC 2.3.3.10) (3-hydroxy-3-methylglutaryl coenzyme A synthase)                                                                                                                  | Hmgcs2                       | 26  | 23  | 18 | 17 |
| P03995 | Glial fibrillary acidic protein (GFAP)                                                                                                                                                                                                               | Gfap                         | 63  | 90  | 22 | 20 |
| P70195 | Proteasome subunit beta type-7 (EC 3.4.25.1) (Proteasome subunit Z) (Macropain chain Z) (Multicatalytic endopeptidase complex chain Z)                                                                                                               | Psmb7 (Mmc14)                | 39  | 40  | 8  | 7  |
| Q11011 | Puromycin-sensitive aminopeptidase (PSA) (EC 3.4.11.-)                                                                                                                                                                                               | Npepps (Psa)                 | 71  | 141 | 30 | 26 |
| Q9JJK8 | Serine/threonine-protein kinase ATR (EC 2.7.11.1) (Ataxia telangiectasia and Rad3-related protein)                                                                                                                                                   | Atr                          | 20  | 25  | 72 | 62 |
| P11881 | Inositol 1,4,5-trisphosphate receptor type 1 (Type 1 inositol 1,4,5-trisphosphate receptor) (Type 1 InsP3 receptor) (IP3 receptor isoform 1) (InsP3R1) (Inositol 1,4,5-trisphosphate-binding protein P400) (Purkinje cell protein 1) (Protein PCD-6) | Itpr1 (Insp3r) (Pcd6) (Pcp1) | 37  | 42  | 48 | 41 |
| P20029 | 78 kDa glucose-regulated protein (GRP 78) (Heat shock 70 kDa protein 5) (Immunoglobulin heavy chain-binding protein) (BiP)                                                                                                                           | Hspa5 (Grp78)                | 262 | 312 | 25 | 21 |
| Q99PT1 | Rho GDP-dissociation inhibitor 1 (Rho GDI 1) (Rho-GDI alpha) (GDI-1)                                                                                                                                                                                 | Arhgdia (C87222) (Gdi1)      | 923 | 675 | 37 | 31 |
| Q64514 | Tripeptidyl-peptidase 2 (EC 3.4.14.10) (Tripeptidyl-peptidase II) (TPP-II) (Tripeptidyl aminopeptidase)                                                                                                                                              | Tpp2                         | 54  | 76  | 24 | 20 |
| Q924C6 | Lysyl oxidase homolog 4 (EC 1.4.3.-) (Lysyl oxidase-like protein 4) (Lysyl oxidase-related protein C)                                                                                                                                                | Loxl4 (Loxc)                 | 15  | 28  | 5  | 4  |
| P00342 | L-lactate dehydrogenase C chain (LDH-C) (EC 1.1.1.27) (LDH testis subunit) (LDH-X)                                                                                                                                                                   | Ldhc (Ldh-3) (Ldh3)          | 97  | 122 | 15 | 12 |

|        |                                                                                                                                                                                                                            |                                                   |     |     |    |    |
|--------|----------------------------------------------------------------------------------------------------------------------------------------------------------------------------------------------------------------------------|---------------------------------------------------|-----|-----|----|----|
| Q9Z2U0 | Proteasome subunit alpha type-7 (EC 3.4.25.1) (Proteasome subunit RC6-1)                                                                                                                                                   | Psma7                                             | 121 | 253 | 15 | 12 |
| P70670 | Nascent polypeptide-associated complex subunit alpha, muscle-specific form (Alpha-NAC, muscle-specific form)                                                                                                               | Naca (Gm1878)                                     | 22  | 130 | 29 | 22 |
| Q9DBG5 | Mannose-6-phosphate receptor-binding protein 1 (Cargo selection protein TIP47)                                                                                                                                             | M6prbp1 (Tip47)                                   | 25  | 22  | 8  | 6  |
| Q9DBP5 | UMP-CMP kinase (EC 2.7.4.14) (Cytidylate kinase) (Deoxycytidylate kinase) (Cytidine monophosphate kinase) (Uridine monophosphate kinase) (Uridine monophosphate/cytidine monophosphate kinase) (UMP/CMP kinase) (UMP/CMPK) | Cmpk1 (Cmk) (Cmpk) (Uck) (Umk) (Umpk)             | 107 | 93  | 12 | 9  |
| P62991 | Ubiquitin                                                                                                                                                                                                                  | Rps27a (Uba80) (Ubcep1); Uba52 (Ubcep2); Ubb; Ubc | 61  | 54  | 11 | 8  |
| P27659 | 60S ribosomal protein L3 (J1 protein)                                                                                                                                                                                      | Rpl3                                              | 192 | 75  | 25 | 18 |
| Q60692 | Proteasome subunit beta type-6 (EC 3.4.25.1) (Proteasome delta chain) (Macropain delta chain) (Multicatalytic endopeptidase complex delta chain) (Proteasome subunit Y)                                                    | Psm6 (Lmp19)                                      | 33  | 89  | 17 | 12 |
| Q8CAY6 | Acetyl-CoA acetyltransferase, cytosolic (EC 2.3.1.9) (Cytosolic acetoacetyl-CoA thiolase)                                                                                                                                  | Acat2                                             | 65  | 18  | 9  | 6  |
| O70435 | Proteasome subunit alpha type-3 (EC 3.4.25.1) (Proteasome component C8) (Macropain subunit C8) (Multicatalytic endopeptidase complex subunit C8) (Proteasome subunit K)                                                    | Psma3                                             | 95  | 76  | 14 | 9  |

|                           |        |                                                                                                                                                                                                                                                                                                        |                         |      |      |     |     |
|---------------------------|--------|--------------------------------------------------------------------------------------------------------------------------------------------------------------------------------------------------------------------------------------------------------------------------------------------------------|-------------------------|------|------|-----|-----|
|                           | Q61983 | Sodium-dependent phosphate transport protein 1 (Sodium/phosphate cotransporter 1) (Na(+)/PI cotransporter 1) (Solute carrier family 17 member 1) (Renal sodium-dependent phosphate transport protein 1) (Renal sodium-phosphate transport protein 1) (Renal Na(+)-dependent phosphate cotransporter 1) | Slc17a1 (Npt1)          | 31   | 33   | 8   | 5   |
|                           | O88291 | Zinc finger protein 326 (Zinc finger protein-associated with nuclear matrix of 75 kDa)                                                                                                                                                                                                                 | Znf326 (Zan75) (Zfp326) | 41   | 55   | 5   | 3   |
|                           | P26040 | Ezrin (p81) (Cytovillin) (Villin-2)                                                                                                                                                                                                                                                                    | Ezr (Vil2)              | 127  | 106  | 27  | 16  |
|                           | Q9D9P2 | Coiled-coil domain-containing protein 103                                                                                                                                                                                                                                                              | Ccdc103                 | 136  | 63   | 12  | 7   |
|                           | P49722 | Proteasome subunit alpha type-2 (EC 3.4.25.1) (Proteasome component C3) (Macropain subunit C3) (Multicatalytic endopeptidase complex subunit C3)                                                                                                                                                       | Psm2 (Lmpc3)            | 188  | 103  | 16  | 9   |
|                           | Q64105 | Sepiapterin reductase (SPR) (EC 1.1.1.153)                                                                                                                                                                                                                                                             | Spr                     | 43   | 27   | 9   | 5   |
|                           | Q9WV89 | Syntaxin-binding protein 4 (Syntaxin 4-interacting protein) (Synip) (STX4-interacting protein)                                                                                                                                                                                                         | Stxbp4                  | 41   | 19   | 11  | 6   |
|                           | P97351 | 40S ribosomal protein S3a                                                                                                                                                                                                                                                                              | Rps3a                   | 899  | 392  | 50  | 26  |
| Other G-protein modulator | Q99N50 | Synaptotagmin-like protein 2 (Exophilin-4)                                                                                                                                                                                                                                                             | Syt12 (Slp2)            | 26   | 77   | 10  | 18  |
|                           | Q8QZR5 | Alanine aminotransferase 1 (ALT1) (EC 2.6.1.2) (Glutamic--pyruvic transaminase 1) (Glutamate pyruvate transaminase 1) (GPT 1) (Glutamic--alanine transaminase 1)                                                                                                                                       | Gpt (Gpt1)              | 25   | 20   | 15  | 26  |
|                           | Q9Z1R2 | Large proline-rich protein BAT3 (HLA-B-associated transcript 3)                                                                                                                                                                                                                                        | Bat3                    | 80   | 49   | 15  | 26  |
|                           | P52480 | Pyruvate kinase isozymes M1/M2 (EC 2.7.1.40) (Pyruvate kinase muscle isozyme)                                                                                                                                                                                                                          | Pkm2 (Pk3) (Pykm)       | 1954 | 3481 | 138 | 233 |
|                           | Q8BYW1 | Rho GTPase-activating protein 25 (Rho-type GTPase-activating protein 25)                                                                                                                                                                                                                               | Arhgap25 (Kiaa0053)     | 30   | 26   | 6   | 10  |

|        |                                                                                                                                                                    |                              |     |     |    |    |
|--------|--------------------------------------------------------------------------------------------------------------------------------------------------------------------|------------------------------|-----|-----|----|----|
| Q61990 | Poly(rC)-binding protein 2 (Alpha-CP2) (Putative heterogeneous nuclear ribonucleoprotein X) (hnRNP X) (CTBP) (CBP)                                                 | Pcbp2 (Cbp) (HnrnpX) (Hnrpx) | 29  | 194 | 7  | 11 |
| Q9D8W5 | 26S proteasome non-ATPase regulatory subunit 12 (26S proteasome regulatory subunit p55)                                                                            | Psmc12                       | 67  | 78  | 7  | 11 |
| P62082 | 40S ribosomal protein S7                                                                                                                                           | Rps7                         | 104 | 126 | 9  | 14 |
| Q3UDW8 | Heparan-alpha-glucosaminide N-acetyltransferase (EC 2.3.1.78) (Transmembrane protein 76)                                                                           | Hgsnat (D8Ert354e) (Tmem76)  | 34  | 22  | 6  | 9  |
| Q8BUG5 | Calcyphosin-2 (Calcyphosine-2)                                                                                                                                     | Caps2                        | 17  | 28  | 8  | 12 |
| P50247 | Adenosylhomocysteinase (AdoHcyase) (EC 3.3.1.1) (S-adenosyl-L-homocysteine hydrolase) (Liver copper-binding protein) (CUBP)                                        | Ahcy                         | 90  | 106 | 10 | 15 |
| P99026 | Proteasome subunit beta type-4 (Proteasome beta chain) (EC 3.4.25.1) (Macropain beta chain) (Multicatalytic endopeptidase complex beta chain) (Proteasome chain 3) | Psmc4 (Lmp3)                 | 93  | 289 | 11 | 16 |
| Q9QZ39 | Alpha-N-acetylgalactosaminide alpha-2,6-sialyltransferase 1 (EC 2.4.99.3) (GalNAc alpha-2,6-sialyltransferase I) (ST6GalNAc I) (Sialyltransferase 7A)              | St6galnac1 (Siat7a)          | 27  | 18  | 11 | 16 |
| P35761 | Dual specificity protein kinase TTK (ESK) (PYT) (EC 2.7.12.1)                                                                                                      | Ttk (Esk)                    | 14  | 34  | 9  | 13 |
| Q8BVI4 | Dihydropteridine reductase (EC 1.5.1.34) (HDHPR) (Quinoid dihydropteridine reductase)                                                                              | Qdpr (Dhpr)                  | 144 | 277 | 7  | 10 |
| P17047 | Lysosome-associated membrane glycoprotein 2 (LAMP-2) (Lysosomal membrane glycoprotein type B) (LGP-B) (CD107 antigen-like family member B) (CD antigen CD107b)     | Lamp2 (Lamp-2)               | 26  | 29  | 8  | 11 |



|        |                                                                                                                                                                                         |                            |     |     |     |     |
|--------|-----------------------------------------------------------------------------------------------------------------------------------------------------------------------------------------|----------------------------|-----|-----|-----|-----|
| O08807 | Peroxiredoxin-4 (EC 1.11.1.15) (Prx-IV) (Thioredoxin peroxidase AO372) (Thioredoxin-independent peroxide reductase A0372) (Antioxidant enzyme AOE372)                                   | Prdx4                      | 273 | 421 | 25  | 34  |
| Q9ERU9 | E3 SUMO-protein ligase RanBP2 (Ran-binding protein 2)                                                                                                                                   | Ranbp2                     | 56  | 49  | 40  | 53  |
| P28271 | Cytoplasmic aconitate hydratase (Aconitase) (EC 4.2.1.3) (Citrate hydro-lyase) (Iron-responsive element-binding protein 1) (IRE-BP 1) (Iron regulatory protein 1) (IRP1)                | Aco1 (Ireb1) (Irebp)       | 77  | 122 | 147 | 184 |
| Q811J3 | Iron-responsive element-binding protein 2 (IRE-BP 2) (Iron regulatory protein 2) (IRP2)                                                                                                 | Ireb2 (Irp2)               | 69  | 119 | 142 | 176 |
| Q8BU30 | Isoleucyl-tRNA synthetase, cytoplasmic (EC 6.1.1.5) (Isoleucine--tRNA ligase) (IleRS) (IRS)                                                                                             | Iars                       | 85  | 46  | 30  | 37  |
| P51880 | Fatty acid-binding protein, brain (B-FABP) (Fatty acid-binding protein 7) (Brain lipid-binding protein) (BLBP)                                                                          | Fabp7 (Blbp)               | 933 | 856 | 31  | 38  |
| P05784 | Keratin, type I cytoskeletal 18 (Cytokeratin-18) (CK-18) (Keratin-18) (K18) (Cytokeratin endo B) (Keratin D)                                                                            | Krt18 (Kerd) (Krt1-18)     | 37  | 46  | 10  | 12  |
| P54227 | Stathmin (Phosphoprotein p19) (pp19) (Leukemia-associated phosphoprotein p18) (Oncoprotein 18) (Op18) (pp17) (Prosolin) (Metablastin) (Protein Pr22) (Leukemia-associated gene protein) | Stmn1 (Lag) (Lap18) (Pr22) | 121 | 120 | 10  | 12  |
| Q9QUR6 | Prolyl endopeptidase (PE) (EC 3.4.21.26) (Post-proline cleaving enzyme)                                                                                                                 | Prep (Pep)                 | 56  | 20  | 15  | 18  |
| P80315 | T-complex protein 1 subunit delta (TCP-1-delta) (CCT-delta) (A45)                                                                                                                       | Cct4 (Cctd)                | 61  | 59  | 15  | 18  |
| O08908 | Phosphatidylinositol 3-kinase regulatory subunit beta (PI3-kinase p85 subunit beta) (PtdIns-3-kinase p85-beta)                                                                          | Pik3r2                     | 19  | 25  | 20  | 24  |
| Q9JKF1 | Ras GTPase-activating-like protein IQGAP1                                                                                                                                               | Iqgap1                     | 19  | 81  | 21  | 25  |

|        |                                                                                                                                                                                                                       |                        |     |     |     |     |
|--------|-----------------------------------------------------------------------------------------------------------------------------------------------------------------------------------------------------------------------|------------------------|-----|-----|-----|-----|
| Q9R0K7 | Plasma membrane calcium-transporting ATPase 2 (PMCA2) (EC 3.6.3.8) (Plasma membrane calcium ATPase isoform 2) (Plasma membrane calcium pump isoform 2)                                                                | Atp2b2 (Pmca2)         | 32  | 27  | 70  | 83  |
| P80313 | T-complex protein 1 subunit eta (TCP-1-eta) (CCT-eta)                                                                                                                                                                 | Cct7 (Ccth)            | 49  | 50  | 11  | 13  |
| Q8C3X4 | GTP-binding protein GUF1 homolog                                                                                                                                                                                      | Guf1                   | 311 | 506 | 412 | 483 |
| P49718 | DNA replication licensing factor MCM5 (CDC46 homolog) (P1-CDC46)                                                                                                                                                      | Mcm5 (Cdc46) (Mcmd5)   | 40  | 20  | 18  | 21  |
| Q5SPW0 | Vacuolar protein sorting-associated protein 54 (Tumor antigen SLP-8p homolog)                                                                                                                                         | Vps54                  | 36  | 28  | 13  | 15  |
| Q6A4J8 | Ubiquitin carboxyl-terminal hydrolase 7 (EC 3.1.2.15) (Ubiquitin thioesterase 7) (Ubiquitin-specific-processing protease 7) (Deubiquitinating enzyme 7) (Herpesvirus-associated ubiquitin-specific protease) (mHAUSP) | Usp7 (Hausp)           | 27  | 18  | 14  | 16  |
| P40124 | Adenylyl cyclase-associated protein 1 (CAP 1)                                                                                                                                                                         | Cap1 (Cap)             | 22  | 43  | 8   | 9   |
| Q64311 | Protein N-terminal asparagine amidohydrolase (EC 3.5.1.-) (Protein NH2-terminal asparagine deamidase) (PNAD) (N-terminal Asn amidase) (NTN-amidase) (Protein NH2-terminal asparagine amidohydrolase) (PNAA)           | Ntan1                  | 20  | 26  | 8   | 9   |
| Q64467 | Glyceraldehyde-3-phosphate dehydrogenase, testis-specific (EC 1.2.1.12) (Spermatogenic glyceraldehyde-3-phosphate dehydrogenase) (Spermatogenic cell-specific glyceraldehyde 3-phosphate dehydrogenase 2) (GAPDH-2)   | Gapdhs (Gapds) (Gapds) | 75  | 781 | 26  | 29  |
| P49717 | DNA replication licensing factor MCM4 (CDC21 homolog) (P1-CDC21)                                                                                                                                                      | Mcm4 (Cdc21) (Mcmd4)   | 29  | 18  | 11  | 12  |

|        |                                                                                                                                                                                             |                               |      |      |     |     |
|--------|---------------------------------------------------------------------------------------------------------------------------------------------------------------------------------------------|-------------------------------|------|------|-----|-----|
| Q8BKC5 | Importin-5 (Imp5) (Importin subunit beta-3) (Karyopherin beta-3) (Ran-binding protein 5) (RanBP5)                                                                                           | Ipo5 (Kpnb3) (Ranbp5)         | 185  | 91   | 12  | 13  |
| P11984 | T-complex protein 1 subunit alpha A (TCP-1-alpha) (CCT-alpha) (Tailless complex polypeptide 1A) (TCP-1-A)                                                                                   | Cct1 (Ccta) (Tcp1)            | 29   | 66   | 14  | 15  |
| P16858 | Glyceraldehyde-3-phosphate dehydrogenase (GAPDH) (EC 1.2.1.12)                                                                                                                              | Gapdh (Gapd)                  | 1514 | 1781 | 84  | 89  |
| Q8VI56 | Low-density lipoprotein receptor-related protein 4 (LDLR dan)                                                                                                                               | Lrp4 (Kiaa0816)               | 77   | 30   | 19  | 20  |
| Q62504 | Msx2-interacting protein (SPEN homolog) (SMART/HDAC1-associated repressor protein)                                                                                                          | Spn (Kiaa0929) (Mint) (Sharp) | 27   | 18   | 72  | 75  |
| Q9JM05 | E3 SUMO-protein ligase PIAS4 (Protein inhibitor of activated STAT protein 4) (Protein inhibitor of activated STAT protein gamma) (PIAS-gamma) (PIASy)                                       | Pias4 (Piasg)                 | 26   | 29   | 162 | 165 |
| Q6P5F9 | Exportin-1 (Exp1) (Chromosome region maintenance 1 protein homolog)                                                                                                                         | Xpo1 (Crm1)                   | 19   | 43   | 9   | 9   |
| Q9CQ60 | 6-phosphogluconolactonase (6PGL) (EC 3.1.1.31)                                                                                                                                              | Pgls                          | 148  | 41   | 11  | 11  |
| Q9WV80 | Sorting nexin-1                                                                                                                                                                             | Snx1                          | 23   | 49   | 11  | 11  |
| Q8R4K2 | Interleukin-1 receptor-associated kinase 4 (IRAK-4) (EC 2.7.11.1)                                                                                                                           | Irak4                         | 32   | 47   | 22  | 22  |
| Q80UK8 | Integrator complex subunit 2 (Int2)                                                                                                                                                         | Ints2 (Kiaa1287)              | 16   | 27   | 24  | 24  |
| Q91YE5 | Bromodomain adjacent to zinc finger domain protein 2A (Transcription termination factor I-interacting protein 5) (TTF-I-interacting protein 5) (Tip5)                                       | Baz2a (Tip5)                  | 36   | 15   | 56  | 55  |
| P23116 | Eukaryotic translation initiation factor 3 subunit A (eIF3a) (Eukaryotic translation initiation factor 3 subunit 10) (eIF-3-theta) (eIF3 p167) (eIF3 p180) (eIF3 p185) (p162) (Centrosomin) | Eif3a (Csma) (Eif3) (Eif3s10) | 199  | 166  | 58  | 56  |

|        |                                                                                                                                                                                      |                       |     |     |    |    |
|--------|--------------------------------------------------------------------------------------------------------------------------------------------------------------------------------------|-----------------------|-----|-----|----|----|
| Q9QXL1 | Kinesin-like protein KIF21B (Kinesin-like protein KIF6)                                                                                                                              | Kif21b (Kif6)         | 22  | 45  | 26 | 25 |
| Q8BGQ7 | Alanyl-tRNA synthetase, cytoplasmic (EC 6.1.1.7) (Alanine--tRNA ligase) (AlaRS)                                                                                                      | Aars                  | 179 | 216 | 23 | 22 |
| Q91V92 | ATP-citrate synthase (EC 2.3.3.8) (ATP-citrate (pro-S-)-lyase) (Citrate cleavage enzyme)                                                                                             | Acly                  | 349 | 488 | 45 | 43 |
| Q9D6Z1 | Nucleolar protein 5A (Nucleolar protein Nop56)                                                                                                                                       | Nol5a (Nop56)         | 38  | 39  | 14 | 13 |
| P08730 | Keratin, type I cytoskeletal 13 (Cytokeratin-13) (CK-13) (Keratin-13) (K13) (47 kDa cytokeratin)                                                                                     | Krt13 (Krt1-13)       | 37  | 46  | 13 | 12 |
| Q8CGC7 | Bifunctional aminoacyl-tRNA synthetase [Includes: Glutamyl-tRNA synthetase (EC 6.1.1.17) (Glutamate--tRNA ligase); Prolyl-tRNA synthetase (EC 6.1.1.15) (Proline--tRNA ligase)]      | Eprs (Qprs)           | 130 | 102 | 32 | 29 |
| Q9QXA7 | Tripartite motif-containing protein 44 (Protein DIPB) (Protein Mc7)                                                                                                                  | Trim44 (Dipb)         | 28  | 23  | 18 | 16 |
| Q8CJ27 | Abnormal spindle-like microcephaly-associated protein homolog (Spindle and hydroxyurea checkpoint abnormal protein) (Calmodulin-binding protein Sha1) (Calmodulin binding protein 1) | Aspm (Calmbp1) (Sha1) | 35  | 23  | 55 | 48 |
| Q9JJK8 | Serine/threonine-protein kinase ATR (EC 2.7.11.1) (Ataxia telangiectasia and Rad3-related protein)                                                                                   | Atr                   | 20  | 25  | 72 | 62 |
| Q9D868 | Peptidyl-prolyl cis-trans isomerase H (PPlase H) (Rotamase H) (EC 5.2.1.8)                                                                                                           | Ppih                  | 55  | 31  | 7  | 6  |
| P20029 | 78 kDa glucose-regulated protein (GRP 78) (Heat shock 70 kDa protein 5) (Immunoglobulin heavy chain-binding protein) (BiP)                                                           | Hspa5 (Grp78)         | 262 | 312 | 25 | 21 |
| P11983 | T-complex protein 1 subunit alpha B (TCP-1-alpha) (CCT-alpha) (Tailless complex polypeptide 1B) (TCP-1-B)                                                                            | Cct1 (Ccta) (Tcp1)    | 29  | 66  | 18 | 15 |

|        |                                                                                                                                                                                                                                                                                                                                                                                                                                                                         |                        |      |      |     |     |
|--------|-------------------------------------------------------------------------------------------------------------------------------------------------------------------------------------------------------------------------------------------------------------------------------------------------------------------------------------------------------------------------------------------------------------------------------------------------------------------------|------------------------|------|------|-----|-----|
| P19096 | Fatty acid synthase (EC 2.3.1.85) [Includes: [Acyl-carrier-protein] S-acetyltransferase (EC 2.3.1.38); [Acyl-carrier-protein] S-malonyltransferase (EC 2.3.1.39); 3-oxoacyl-[acyl-carrier-protein] synthase (EC 2.3.1.41); 3-oxoacyl-[acyl-carrier-protein] reductase (EC 1.1.1.100); 3-hydroxypalmitoyl-[acyl-carrier-protein] dehydratase (EC 4.2.1.61); Enoyl-[acyl-carrier-protein] reductase (EC 1.3.1.10); Oleoyl [acyl-carrier-protein] hydrolase (EC 3.1.2.14)] | Fasn                   | 1869 | 1524 | 163 | 135 |
| P80316 | T-complex protein 1 subunit epsilon (TCP-1-epsilon) (CCT-epsilon)                                                                                                                                                                                                                                                                                                                                                                                                       | Cct5 (Ccte) (Kiaa0098) | 239  | 102  | 17  | 14  |
| Q64512 | Tyrosine-protein phosphatase non-receptor type 13 (EC 3.1.3.48) (Protein tyrosine phosphatase PTP-BL) (Protein-tyrosine phosphatase RIP) (Protein tyrosine phosphatase DPZPTP) (PTP36)                                                                                                                                                                                                                                                                                  | Ptpn13 (Ptp14)         | 28   | 27   | 26  | 21  |
| Q5XJY5 | Coatomer subunit delta (Delta-coat protein) (Delta-COP) (Archain)                                                                                                                                                                                                                                                                                                                                                                                                       | Arcn1 (Copd)           | 61   | 45   | 10  | 8   |
| P12970 | 60S ribosomal protein L7a (Surfeit locus protein 3)                                                                                                                                                                                                                                                                                                                                                                                                                     | Rpl7a (Surf-3) (Surf3) | 111  | 31   | 15  | 12  |
| Q99MD9 | Nuclear autoantigenic sperm protein (NASP)                                                                                                                                                                                                                                                                                                                                                                                                                              | Nasp                   | 365  | 293  | 34  | 27  |
| Q91ZU6 | Bullous pemphigoid antigen 1, isoforms 1/2/3/4 (BPA) (Hemidesmosomal plaque protein) (Dystonia musculorum protein) (Dystonin)                                                                                                                                                                                                                                                                                                                                           | Dst (Bpag1)            | 78   | 38   | 126 | 100 |
| Q8BP67 | 60S ribosomal protein L24                                                                                                                                                                                                                                                                                                                                                                                                                                               | Rpl24                  | 354  | 214  | 24  | 19  |
| Q80ZI6 | E3 ubiquitin-protein ligase LRSAM1 (EC 6.3.2.-) (Leucine-rich repeat and sterile alpha motif-containing protein 1) (Tsg101-associated ligase)                                                                                                                                                                                                                                                                                                                           | Lrsam1                 | 19   | 35   | 19  | 15  |
| P63325 | 40S ribosomal protein S10                                                                                                                                                                                                                                                                                                                                                                                                                                               | Rps10                  | 468  | 168  | 42  | 33  |

|        |                                                                                                                                                                                                                            |                                       |     |     |    |    |
|--------|----------------------------------------------------------------------------------------------------------------------------------------------------------------------------------------------------------------------------|---------------------------------------|-----|-----|----|----|
| P97434 | Myosin phosphatase Rho-interacting protein (Rho-interacting protein 3) (RIP3) (p116Rip)                                                                                                                                    | Mprip (Kiaa0864) (Mrip) (Rhoip3)      | 35  | 23  | 25 | 19 |
| Q9QYB1 | Chloride intracellular channel protein 4 (mc3s5/mtCLIC)                                                                                                                                                                    | Clic4                                 | 28  | 33  | 4  | 3  |
| Q9DBP5 | UMP-CMP kinase (EC 2.7.4.14) (Cytidylate kinase) (Deoxycytidylate kinase) (Cytidine monophosphate kinase) (Uridine monophosphate kinase) (Uridine monophosphate/cytidine monophosphate kinase) (UMP/CMP kinase) (UMP/CMPK) | Cmpk1 (Cmk) (Cmpk) (Uck) (Umk) (Umpk) | 107 | 93  | 12 | 9  |
| P62751 | 60S ribosomal protein L23a                                                                                                                                                                                                 | Rpl23a                                | 75  | 49  | 16 | 12 |
| O54887 | Testis-specific serine kinase substrate (Testis-specific kinase substrate) (STK22 substrate 1)                                                                                                                             | Stk22s1 (Tsks)                        | 50  | 21  | 16 | 12 |
| Q9D8V0 | Minor histocompatibility antigen H13 (EC 3.4.23.-) (Signal peptide peptidase) (Presenilin-like protein 3)                                                                                                                  | Hm13 (H13) (Psl3)                     | 23  | 29  | 28 | 21 |
| P62264 | 40S ribosomal protein S14                                                                                                                                                                                                  | Rps14                                 | 163 | 166 | 15 | 11 |
| Q91Z67 | SLIT-ROBO Rho GTPase-activating protein 2 (srGAP2) (Formin-binding protein 2) (Formin-binding protein 27) (FBP-27)                                                                                                         | Srgap2 (Fbp27) (Fnbp2)                | 77  | 48  | 11 | 8  |
| Q9CR57 | 60S ribosomal protein L14                                                                                                                                                                                                  | Rpl14                                 | 508 | 391 | 33 | 24 |
| Q8BX70 | Vacuolar protein sorting-associated protein 13C                                                                                                                                                                            | Vps13c (Kiaa3021)                     | 25  | 17  | 53 | 38 |
| Q60673 | Receptor-type tyrosine-protein phosphatase-like N (R-PTP-N) (PTP IA-2)                                                                                                                                                     | Ptpn (Ptp35)                          | 30  | 18  | 14 | 10 |
| Q6PFD5 | Disks large-associated protein 3 (DAP-3) (SAP90/PSD-95-associated protein 3) (SAPAP3) (PSD-95/SAP90-binding protein 3)                                                                                                     | Dlgap3 (Dap3)                         | 28  | 21  | 21 | 15 |
| P14869 | 60S acidic ribosomal protein P0 (L10E)                                                                                                                                                                                     | Rplp0 (Arbp)                          | 115 | 334 | 28 | 20 |
| Q91YJ5 | Translation initiation factor IF-2, mitochondrial (IF-2Mt) (IF2(mt)) (IF-2(Mt))                                                                                                                                            | Mtif2                                 | 29  | 23  | 13 | 9  |

|        |                                                                                                                                                                                                                                                                                                        |                             |      |     |     |    |
|--------|--------------------------------------------------------------------------------------------------------------------------------------------------------------------------------------------------------------------------------------------------------------------------------------------------------|-----------------------------|------|-----|-----|----|
| P29391 | Ferritin light chain 1 (Ferritin L subunit 1)                                                                                                                                                                                                                                                          | Ftl1 (Ftl) (Ftl-1)          | 150  | 159 | 6   | 4  |
| P42932 | T-complex protein 1 subunit theta (TCP-1-theta) (CCT-theta)                                                                                                                                                                                                                                            | Cct8 (Cctq)                 | 197  | 57  | 23  | 15 |
| P40142 | Transketolase (TK) (EC 2.2.1.1) (P68)                                                                                                                                                                                                                                                                  | Tkt                         | 562  | 250 | 117 | 75 |
| Q61983 | Sodium-dependent phosphate transport protein 1 (Sodium/phosphate cotransporter 1) (Na(+)/PI cotransporter 1) (Solute carrier family 17 member 1) (Renal sodium-dependent phosphate transport protein 1) (Renal sodium-phosphate transport protein 1) (Renal Na(+)-dependent phosphate cotransporter 1) | Slc17a1 (Npt1)              | 31   | 33  | 8   | 5  |
| Q80U87 | Ubiquitin carboxyl-terminal hydrolase 8 (EC 3.1.2.15) (Ubiquitin thioesterase 8) (Ubiquitin-specific-processing protease 8) (Deubiquitinating enzyme 8) (mUBPy)                                                                                                                                        | Usp8 (Kiaa0055) (Ubpy)      | 29   | 23  | 24  | 15 |
| Q3UXZ6 | Protein FAM81A                                                                                                                                                                                                                                                                                         | Fam81a                      | 22   | 27  | 13  | 8  |
| P84099 | 60S ribosomal protein L19                                                                                                                                                                                                                                                                              | Rpl19                       | 39   | 47  | 13  | 8  |
| O08709 | Peroxiredoxin-6 (EC 1.11.1.15) (Antioxidant protein 2) (1-Cys peroxiredoxin) (1-Cys PRX) (Acidic calcium-independent phospholipase A2) (aiPLA2) (EC 3.1.1.-) (Non-selenium glutathione peroxidase) (NSGPx) (EC 1.11.1.7)                                                                               | Prdx6 (Aop2) (Ltw4) (Prdx5) | 56   | 29  | 5   | 3  |
| P80317 | T-complex protein 1 subunit zeta (TCP-1-zeta) (CCT-zeta) (CCT-zeta-1)                                                                                                                                                                                                                                  | Cct6a (Cct6) (Cctz) (Cctz1) | 160  | 52  | 22  | 13 |
| P63017 | Heat shock cognate 71 kDa protein (Heat shock 70 kDa protein 8)                                                                                                                                                                                                                                        | Hspa8 (Hsc70) (Hsc73)       | 1719 | 959 | 119 | 70 |
| Q9JI78 | Peptide-N(4)-(N-acetyl-beta-glucosaminy)asparagine amidase (PNGase) (mPNGase) (EC 3.5.1.52) (Peptide:N-glycanase) (N-glycanase 1)                                                                                                                                                                      | Ngly1                       | 29   | 32  | 19  | 11 |

|        |                                                                                                                                                      |                           |     |     |    |    |
|--------|------------------------------------------------------------------------------------------------------------------------------------------------------|---------------------------|-----|-----|----|----|
| P53762 | Aryl hydrocarbon receptor nuclear translocator (ARNT protein) (Dioxin receptor, nuclear translocator) (Hypoxia-inducible factor 1 beta) (HIF-1 beta) | Arnt                      | 25  | 22  | 7  | 4  |
| P97287 | Induced myeloid leukemia cell differentiation protein Mcl-1 homolog (Bcl-2-related protein EAT/mcl1)                                                 | Mcl1                      | 26  | 30  | 7  | 4  |
| Q9QUK4 | Baculoviral IAP repeat-containing protein 1b (Neuronal apoptosis inhibitory protein 2)                                                               | Naip2 (Birc1b) (Naip-rs6) | 21  | 28  | 14 | 8  |
| Q9D8N3 | Transmembrane protein 86A                                                                                                                            | Tmem86a                   | 38  | 27  | 30 | 17 |
| Q9WUJ8 | Origin recognition complex subunit 6                                                                                                                 | Orc6l (Orc6)              | 59  | 37  | 13 | 7  |
| Q61390 | T-complex protein 1 subunit zeta-2 (TCP-1-zeta-2) (CCT-zeta-2) (Cctz-2)                                                                              | Cct6b                     | 55  | 52  | 15 | 8  |
| P97351 | 40S ribosomal protein S3a                                                                                                                            | Rps3a                     | 899 | 392 | 50 | 26 |
